# Supplementary material for: RNA-dependent RNA targeting by CRISPR-Cas9
Source: eLife journal article supplement (doi:10.7554/elife.32724), 2018-01-05
Supplement: supp [file elife-32724-supp-v1.zip]

Archive with 15 entries (15 files):
- elife_poa_e32724_Figure_3_figure_supplement_2_source_data_1.xlsx
- elife_poa_e32724_Figure_4_figure_supplement_1_source_data_1.xlsx
- elife_poa_e32724_Figure_1_figure_supplement_3_source_data_1.xlsx
- elife_poa_e32724_Figure_3_figure_supplement_3_source_data_1.xlsx
- elife_poa_e32724_Transparent_Reporting_File.pdf
- elife_poa_e32724_Figure_1_figure_supplement_1_source_data_1.xlsx
- elife_poa_e32724_Figure_2_figure_supplement_1_source_data_1.xlsx
- elife_poa_e32724_Figure_2_source_data_1.xlsx
- elife_poa_e32724_Figure_3_figure_supplement_1_source_data_1.xlsx
- elife_poa_e32724_Supplementary_File_1.xlsx
- elife_poa_e32724_Figure_1_figure_supplement_2_source_data_1.xlsx
- elife_poa_e32724_Figure_1_figure_supplement_4_source_data_1.xlsx
- elife_poa_e32724_Figure_3_figure_supplement_4_source_data_1.xlsx
- elife_poa_e32724_Figure_3_source_data_1.xlsx
- elife_poa_e32724_Figure_4_source_data_1.xlsx
