# Supplementary material for: RNA-dependent RNA targeting by CRISPR-Cas9
Source: eLife journal article supplement (doi:10.7554/elife.32724), 2018-01-05
Supplement: supp [file elife-32724-supp-v1.zip › elife_poa_e32724_Figure_1_figure_supplement_1_source_data_1.xlsx]

## Sheet: FigS1C
Time	Spy			Sau			Fno			Cje
0	0	0.00306492	0.00294745	0	0.00556432	0	0.00428604	0.0057728	0.00466911	0.00584921	0.00637727	0.00529006
1	0	0.00292994	0	0.00558631	0.0149622	0.0150183	0.00375432	0.002773	0.00410063	0.0206864	0.0144856	0.0182008
2	0	0.00250162	0	0.0220629	0.0337222	0.0307399	0.00330917	0.00733986	0.00309802	0.0328209	0.031	0.032119
5	0.00122759	0.00274889	0	0.0959408	0.121687	0.0972937	0.00429622	0.00280211	0.00519708	0.0995787	0.0927229	0.0748018
10	0	0	0.00500098	0.154297	0.168637	0.18243	0.00452471	0.0029407	0.00531017	0.156581	0.144117	0.132865
30	0.0109402	0.0101098	0.002589	0.43747	0.486531	0.403329	0.0102376	0.00818113	0.00812381	0.352177	0.360317	0.259645
60	0.0111581	0.0104208	0.0058397	0.432798	0.460965	0.333704	0.0144515	0.012304	0.00923137	0.435642	0.363106	0.255316
120	0.00864477	0.00684055	0.0073385	0.337562	0.324989	0.30643	0.0220489	0.0207951	0.0183377	0.355274	0.309847	0.218355
Calculated Fit
	Spy	Sau	Fno	Cje
One phase decay			Ambiguous
Best-fit values
Y0	0.0004984	-0.0229	0.003888	-0.007451
Plateau	0.008783	0.3929	~ 0.3969	0.3326
K	0.04309	0.08143	~ 0.0003571	0.07119
Half Life	16.09	8.512	~ 1941	9.737
Tau	23.21	12.28	~ 2801	14.05
Span	-0.008284	-0.4158	~ -0.393	-0.3401
Std. Error
Y0	0.0008626	0.02123	0.0004605	0.01785
Plateau	0.001313	0.02105	~ 4.044	0.0191
K	0.0233	0.01698	~ 0.00375	0.01607
Span	0.001407	0.02747	~ 4.044	0.0238
95% CI (profile likelihood)
Y0	-0.001233 to 0.002143	-0.0649 to 0.01772	???	-0.04363 to 0.02725
Plateau	0.006611 to 0.01202	0.3527 to 0.4348	(Very wide)	0.2961 to 0.3718
K	0.01554 to 0.09607	0.05774 to 0.1137	(Very wide)	0.04748 to 0.1052
Half Life	7.215 to 44.61	6.094 to 12		6.588 to 14.6
Tau	10.41 to 64.36	8.792 to 17.32		9.505 to 21.06
Goodness of Fit
Degrees of Freedom	21	21	21	21
R square	0.6534	0.916	0.9301	0.907
Absolute Sum of Squares	0.0001274	0.05914	5.34e-05	0.04415
Sy.x	0.002463	0.05307	0.001595	0.04585
Constraints
K	K > 0	K > 0	K > 0	K > 0
Number of points
# of X values	24	24	24	24
# Y values analyzed	24	24	24	24
