# Supplementary material for: RNA-dependent RNA targeting by CRISPR-Cas9
Source: eLife journal article supplement (doi:10.7554/elife.32724), 2018-01-05
Supplement: supp [file elife-32724-supp-v1.zip › elife_poa_e32724_Figure_1_figure_supplement_2_source_data_1.xlsx]

## Sheet: FigS2C
Time(min)	100:10			5:10			2.5:10				1:10
0	0.00121779	0	0.00163848	0.00123668	0.00124756	0.00174222	0.00176688	0.000574638	0.000338063	0.000946783	0.00147295	0.00168637
1	0.030033	0.0261455	0.0494273	0.0212576	0.0189869	0.0200575	0.0110211	0.0104287	0.0109539	0.00541645	0.00354059	0.00483321
2	0.0693282	0.0684567	0.107473	0.0481681	0.0361405	0.0468385	0.025872	0.0239517	0.027152	0.00961559	0.0083122	0.0085215
5	0.164345	0.174532	0.225027	0.120601	0.104065	0.114444	0.0537402	0.0495641	0.0566398	0.0198176	0.0157798	0.0180599
10	0.262141	0.253078	0.371029	0.153865	0.124666	0.165119	0.0724453	0.0716351	0.0780958	0.0204527	0.0160979	0.0234527
30	0.457365	0.384572	0.556156	0.226993	0.224595	0.222102	0.0988337	0.0866257	0.0986645	0.0263405	0.015415	0.0277047
60	0.543044	0.460284	0.525856	0.227458	0.210577	0.229932	0.0908648	0.0778369	0.0916081	0.0222566	0.0191613	0.0283403
120	0.542929	0.466519	0.623864	0.196602	0.217937	0.230075	0.0813553	0.0985523	0.0938596	0.0240199	0.0274127	0.0270559
Calculated Fit
	4 days, 4:10:00	05:10:00	2.5:10	01:10:00
One-phase association
Best-fit values
Y0	0.001893	-0.00171	-0.001022	0.00089
Plateau	0.5251	0.2216	0.09103	0.02404
K	0.08147	0.1244	0.172	0.2187
Tau	12.27	8.039	5.814	4.573
Half-time	8.508	5.572	4.03	3.17
Span	0.5232	0.2233	0.09205	0.02315
Std. Error
Y0	0.01866	0.005194	0.002409	0.00154
Plateau	0.0185	0.004253	0.001762	0.001039
K	0.01187	0.01009	0.01437	0.04447
Span	0.02415	0.006338	0.002837	0.001764
95% CI (profile likelihood)
Y0	-0.03834 to 0.04076	-0.01257 to 0.008957	-0.006045 to 0.003908	-0.002428 to 0.004055
Plateau	0.487 to 0.5659	0.2128 to 0.2304	0.0874 to 0.09469	0.0219 to 0.02626
K	0.05835 to 0.111	0.105 to 0.1467	0.145 to 0.2038	0.139 to 0.3372
Tau	9.006 to 17.14	6.816 to 9.52	4.908 to 6.898	2.966 to 7.194
Half-time	6.242 to 11.88	4.725 to 6.599	3.402 to 4.781	2.056 to 4.987
Goodness of Fit
Degrees of Freedom	21	21	21	21
R square	0.9572	0.9836	0.981	0.8951
Absolute Sum of Squares	0.0457	0.003031	0.0005789	0.0002145
Sy.x	0.04665	0.01201	0.00525	0.003196
Constraints
K	K > 0	K > 0	K > 0	K > 0
Number of points
# of X values	24	24	24	24
# Y values analyzed	24	24	24	24
