# Supplementary material for: RNA-dependent RNA targeting by CRISPR-Cas9
Source: eLife journal article supplement (doi:10.7554/elife.32724), 2018-01-05
Supplement: supp [file elife-32724-supp-v1.zip › elife_poa_e32724_Figure_1_figure_supplement_3_source_data_1.xlsx]

## Sheet: FigS3C
Time (min)	ssDNA			dsDNA			ssRNA			dsRNA			ssRNA+PAMmer			ssRNA NTS			ssRNA + 23mer DNA oligo
0	0	0	0	0.00528895	0.00721373	0.00758455	0.00338892	0.00267944	0.00891732	0.00175423	0	0	0.00721002	0.00742587	0	0.00816365	0.0101682	0.00643962	0.00360475	0.00473894	0.00219417
1	0.417391	0.428479	0.513349	0.902074	0.917485	0.878816	0.0105651	0.0120889	0.015398	0.00164613	0	0.000888357	0.00826968	0.0129533	0.00698313	0.00741711	0.00319688	0.00805569	0.0147953	0.0100035	0.00393776
2	0.618157	0.658242	0.729081	0.909332	0.909401	0.930728	0.0278485	0.0245765	0.030053	0.000819889	0	0.00254711	0.00915207	0.0123515	0.0085807	0.0109775	0.00649955	0.00630768	0.0327829	0.0101084	0.0259778
5	0.747898	0.777075	0.825227	0.929711	0.926565	0.921894	0.0924737	0.0846764	0.09118	0.00065209	0	0.00128834	0.0135829	0.0203338	0.0128864	0.0132189	6.07486e-05	0.00663752	0.0701179	0.0884752	0.102258
10	0.749371	0.776547	0.824682	0.93676	0.936932	0.93578	0.155423	0.159814	0.209006	0.000621998	0	0.00143395	0.0260615	0.0265407	0.0214619	0.00535828	0.0109016	0.0122291	0.123087	0.114624	0.147444
30	0.706956	0.740804	0.809041	0.968478	0.958192	0.952652	0.480305	0.505408	0.366318	0.00138616	0	0.00163774	0.0530952	0.0552872	0.0442785	0.0080655	0.00798686	0.0158107	0.227234	0.228075	0.290018
60	0.814832	0.74969	0.853297	0.968278	0.967037	0.969563	0.449657	0.360093	0.375481	0.000646461	0.000313785	0.00253842	0.0711112	0.061661	0.0604353	0.00868966	0.00534101	0.0113723	0.248835	0.225339	0.261951
120	0.815314	0.863734	0.869478	0.963207	0.967816	0.961644	0.363147	0.288197	0.336713	0.00173009	0.000816197	0.00181099	0.0705096	0.0617847	0.0678733	0.00308342	0.00924039	0.00832423	0.254883	0.273985	0.305785
Calculated Fit
	ssDNA	dsDNA	ssRNA	dsRNA	ssRNA+PAMmer	ssRNA NTS	ssRNA + 23mer DNA oligo
One phase decay
Best-fit values
Y0	-0.001808	0.006771	-0.02414	0.0007612	0.00499	0.007188	-0.004951
Plateau	0.7979	0.9461	0.3926	0.002649	0.0684	0.008706	0.2675
K	0.8677	2.943	0.08144	0.003845	0.04114	0.1405	0.07277
Half Life	0.7988	0.2355	8.511	180.3	16.85	4.934	9.525
Tau	1.152	0.3398	12.28	260.1	24.31	7.118	13.74
Span	-0.7997	-0.9393	-0.4167	-0.001887	-0.06341	-0.001518	-0.2724
Std. Error
Y0	0.02683	0.01125	0.02266	0.0002416	0.001366	0.001576	0.007985
Plateau	0.01236	0.004671	0.02246	0.01821	0.002161	0.001235	0.008437
K	0.07367	0.2466	0.01808	0.0459	0.00469	0.4895	0.009101
Span	0.02918	0.01217	0.02932	0.0181	0.002289	0.001898	0.01059
95% CI (profile likelihood)
Y0	-0.05758 to 0.05386	-0.01662 to 0.03016	-0.06883 to 0.01909	0.0006771 to 0.001203	0.002156 to 0.007768	0.003808 to 0.00946	-0.02173 to 0.01139
Plateau	0.7724 to 0.8237	0.9364 to 0.9559	0.3499 to 0.4373	-infinity to +infinity	0.06422 to 0.07303	??? to +infinity	0.2505 to 0.2856
K	0.7281 to 1.036	2.518 to 3.702	0.05661 to 0.1155	5.769e-011 to +infinity	0.03271 to 0.05141	??? to +infinity	0.05576 to 0.09349
Half Life	0.6692 to 0.952	0.1872 to 0.2753	5.999 to 12.24	??? to 12014390669	13.48 to 21.19		7.414 to 12.43
Tau	0.9655 to 1.373	0.2701 to 0.3972	8.655 to 17.66	??? to 17333101837	19.45 to 30.57		10.7 to 17.93
Goodness of Fit
Degrees of Freedom	21	21	21	21	21	21	21
R square	0.9735	0.9965	0.9058	0.08345	0.9772	0.03019	0.9693
Absolute Sum of Squares	0.04619	0.007968	0.06736	1.431e-05	0.0003254	0.0002673	0.00876
Sy.x	0.0469	0.01948	0.05664	0.0008255	0.003937	0.003568	0.02042
Constraints
K	K > 0	K > 0	K > 0	K > 0	K > 0	K > 0	K > 0
Number of points
# of X values	24	24	24	24	24	24	24
# Y values analyzed	24	24	24	24	24	24	24
