# Supplementary material for: RNA-dependent RNA targeting by CRISPR-Cas9
Source: eLife journal article supplement (doi:10.7554/elife.32724), 2018-01-05
Supplement: supp [file elife-32724-supp-v1.zip › elife_poa_e32724_Figure_1_figure_supplement_4_source_data_1.xlsx]

## Sheet: FigS4C
Time (min)	20mer			21mer			22mer			23mer			24mer			25mer			26mer
0	0.00507905	0	0.00596941	0	0.00886954	0.00710547	0	0	0.00779191	0.0106597	0	0.0106098	0.00102984	0.000665485	0.000304882	0.00181053	0.00106622	0.00124901	0	0.000752654	0.00113173
1	0	0	0.00250725	0	0.00145746	0.00831564	0	0.0161158	0.0088702	0.0203019	0.016094	0.0206052	0.00382848	0.00351707	0.000474687	0.00320878	0.00375251	0	0	0.00417048	0.00568965
2	0.00316649	0	0.002381	0	0.0107619	0.00957241	0.0117582	0.0149283	0.0115677	0.040398	0.0354304	0.0354763	0.00447771	0.00830554	0.00676593	0.006646	0.00862787	0.00504103	0.00964034	0.0137918	0.0111069
5	0.00513101	0.000547546	0.00229105	0.0208525	0.022509	0.0223657	0.0425435	0.0510721	0.0423372	0.0897259	0.0927486	0.0986146	0.0182485	0.0277629	0.0284531	0.0164194	0.0279447	0.0207397	0.0419416	0.0494188	0.0446352
10	0.00732683	0.0149494	0	0.0572505	0.0587286	0.0573463	0.0901098	0.125061	0.0982474	0.175601	0.165782	0.193926	0.0459998	0.0480947	0.0414571	0.0293144	0.0583867	0.043535	0.102603	0.112863	0.104772
30	0.0295207	0.0322678	0.0212219	0.130829	0.146139	0.169638	0.19219	0.21773	0.248599	0.328363	0.272495	0.357424	0.111087	0.193463	0.155208	0.0919816	0.163041	0.183445	0.243337	0.285574	0.30424
60	0.0334763	0.0409788	0.0310319	0.17466	0.168206	0.222704	0.205541	0.242302	0.285763	0.312496	0.323073	0.386729	0.0942333	0.166187	0.173744	0.0904442	0.154153	0.168933	0.208403	0.298001	0.255503
120	0.0376215	0.0401342	0.0339258	0.151186	0.178541	0.186874	0.201968	0.227082	0.261235	0.296478	0.318496	0.380822	0.0981738	0.121522	0.0950442	0.10538	0.129487	0.101616	0.218965	0.217166	0.176331
Summary
Targeting length	Plateau	SE
20mer	0.03933	0.002917
21mer	0.1862	0.008372
22mer	0.2436	0.009587
23mer	0.3425	0.01021
24mer	0.1347	0.01152
25mer	0.1338	0.01134
26mer	0.2468	0.01422
Calculated fit
	20mer	21mer	22mer	23mer	24mer	25mer	26mer
One phase decay
Best-fit values
Y0	-0.0004493	-0.007608	-0.009936	-0.004782	-0.01044	-0.009726	-0.01999
Plateau	0.03933	0.1862	0.2436	0.3425	0.1347	0.1338	0.2468
K	0.03351	0.0479	0.0626	0.07483	0.07263	0.06825	0.07847
Half Life	20.68	14.47	11.07	9.263	9.543	10.16	8.833
Tau	29.84	20.88	15.97	13.36	13.77	14.65	12.74
Span	-0.03978	-0.1938	-0.2535	-0.3473	-0.1452	-0.1435	-0.2668
Std. Error
Y0	0.001535	0.005973	0.008263	0.009817	0.01089	0.01033	0.01405
Plateau	0.002917	0.008372	0.009587	0.01021	0.01152	0.01135	0.01421
K	0.007508	0.007363	0.009217	0.008929	0.02326	0.02148	0.01712
Span	0.002958	0.009218	0.01144	0.01294	0.01445	0.01394	0.01832
95% CI (profile likelihood)
Y0	-0.003602 to 0.002625	-0.01972 to 0.004224	-0.02679 to 0.006462	-0.02501 to 0.01495	-0.03189 to 0.01004	-0.03019 to 0.009859	-0.04767 to 0.006814
Plateau	0.0342 to 0.04604	0.1705 to 0.2033	0.225 to 0.2634	0.3222 to 0.3637	0.1134 to 0.1575	0.1128 to 0.1565	0.2199 to 0.275
K	0.02139 to 0.04992	0.03619 to 0.06279	0.04749 to 0.08175	0.05915 to 0.09384	0.04397 to 0.1178	0.04081 to 0.1108	0.05501 to 0.1105
Half Life	13.89 to 32.41	11.04 to 19.15	8.479 to 14.6	7.387 to 11.72	5.882 to 15.77	6.255 to 16.98	6.275 to 12.6
Tau	20.03 to 46.76	15.93 to 27.63	12.23 to 21.06	10.66 to 16.91	8.485 to 22.75	9.025 to 24.5	9.053 to 18.18
Goodness of Fit
Degrees of Freedom	21	21	21	21	21	21	21
R square	0.9211	0.9582	0.9596	0.9717	0.8281	0.8356	0.91
Absolute Sum of Squares	0.000442	0.005855	0.009996	0.01309	0.0163	0.01506	0.02629
Sy.x	0.004588	0.0167	0.02182	0.02496	0.02786	0.02678	0.03538
Constraints
K	K > 0	K > 0	K > 0	K > 0	K > 0	K > 0	K > 0
Number of points
# of X values	24	24	24	24	24	24	24
# Y values analyzed	24	24	24	24	24	24	24

## Sheet: FigS4D
Concentration (nM)	20mer			21mer			22mer			23mer			24mer			25mer			26mer			dsDNA
200	0.703014	0.731729	0.718498	0.693213	0.696589	0.690687	0.794587	0.797926	0.822251	0.935807	0.933477	0.918166	0.645549	0.792379	0.706809	0.806629	0.777814	0.781689	0.874816	0.896242	0.890041	0.974628	0.974462	0.971965
20	0.432446	0.448609	0.44219	0.431243	0.405424	0.380328	0.674146	0.713619	0.717306	0.878041	0.8868	0.871073	0.498635	0.456169	0.37632	0.450331	0.47703	0.36328	0.63019	0.631453	0.627526	0.969328	0.967099	0.965019
2	0.109903	0.119242	0.114306	0.122519	0.126848	0.110253	0.190347	0.236243	0.257643	0.450587	0.513687	0.537529	0.0728173	0.0862391	0.0704629	0.0768619	0.0600018	0.0395197	0.287863	0.282087	0.197891	0.831814	0.809113	0.776306
0.2	0.0256331	0.0273568	0.0331726	0.0369515	0.0380863	0.0320296	0.0259398	0.0402563	0.0454316	0.0789155	0.0776297	0.0833318	0	0	0.00310902	0	0.00475623	0.00317294	0.0723071	0.0742196	0.0592659	0.376632	0.360636	0.332905
0.02	0.00716252	0.00730091	0.00986656	0.00863407	0.00912636	0.0194765	0.00741636	0.00812166	0.0215649	0.00839619	0.0122569	0.0486347	0	0	0	0	0	0	0.0550362	0.0672155	0.053793	0.0957353	0.100489	0.107689
0.002	0.00500639	0.0050239	0.0059712	0.00557552	0.00499351	0.00650346	0.00609255	0.00360756	0.00562659	0.00542438	0.00519139	0.00976128	0	0	0	0	0	1.90009e-05	0.0598696	0.0725235	0.0492645	0.0649587	0.0587631	0.0603178
Summary
targeting length	Kd (Mean)	SE
20mer	13.83	0.6989
21mer	14.98	1.263
22mer	4.827	0.3332
23mer	1.798	0.09286
24mer	15.3	1.897
25mer	21.21	1.634
26mer	6.008	1.058
dsDNA with 23mer guide	0.3433	0.03102
Calculated fit
	20mer	21mer	22mer	23mer	24mer	25mer	26mer	dsDNA
One site binding (hyperbola)
Best-fit values
Bmax	0.7633	0.7391	0.8401	0.9466	0.7719	0.8741	0.8838	0.9709
Kd	13.83	14.98	4.827	1.798	15.3	21.21	6.008	0.3433
Std. Error
Bmax	0.009452	0.01555	0.01176	0.009289	0.024	0.01805	0.0322	0.01407
Kd	0.6989	1.263	0.3332	0.09286	1.897	1.634	1.058	0.03102
95% CI (profile likelihood)
Bmax	0.7434 to 0.7837	0.7061 to 0.7733	0.8161 to 0.8645	0.9273 to 0.9661	0.7233 to 0.8228	0.8372 to 0.9123	0.8149 to 0.9587	0.941 to 1.001
Kd	12.37 to 15.41	12.37 to 18.01	4.205 to 5.543	1.615 to 1.999	11.8 to 19.66	18.07 to 24.85	3.952 to 9.157	0.2813 to 0.4194
Goodness of Fit
Degrees of Freedom	19	19	19	19	19	19	19	16
R square	0.9978	0.9935	0.9963	0.9977	0.9869	0.9946	0.9729	0.9922
Absolute Sum of Squares	0.003197	0.008322	0.008267	0.007301	0.01964	0.009308	0.05565	0.02094
Sy.x	0.01297	0.02093	0.02086	0.0196	0.03215	0.02213	0.05412	0.03618
Constraints
Bmax	Bmax > 0	Bmax > 0	Bmax > 0	Bmax > 0	Bmax > 0	Bmax > 0	Bmax > 0	Bmax > 0
Kd	Kd > 0	Kd > 0	Kd > 0	Kd > 0	Kd > 0	Kd > 0	Kd > 0	Kd > 0
Number of points
# of X values	21	21	21	21	21	21	21	18
# Y values analyzed	21	21	21	21	21	21	21	18
