# Supplementary material for: RNA-dependent RNA targeting by CRISPR-Cas9
Source: eLife journal article supplement (doi:10.7554/elife.32724), 2018-01-05
Supplement: supp [file elife-32724-supp-v1.zip › elife_poa_e32724_Figure_2_figure_supplement_1_source_data_1.xlsx]

## Sheet: FigS5D
Time post addition (min)	RNP			Apo
0	0.361809	0.340976	0.34318	0.554181	0.315234	0.346362
1	0.412552	0.363403	0.343322	0.470764	0.334948	0.346812
2	0.277968	0.331477	0.320756	0.364712	0.318794	0.337284
5	0.358769	0.328596	0.323792	0.388179	0.356952	0.351636
10	0.341275	0.329282	0.335014	0.371098	0.36271	0.31275
30	0.339005	0.305753	0.285879	0.32696	0.342517	0.329043
60	0.309907	0.252279	0.272832	0.419196	0.285406	0.343239
Calculated fit
	RNP	Apo
One phase decay
Best-fit values
Y0	0.346	0.4074
Plateau	0.1707	0.347
K	0.008037	0.8685
Half Life	86.24	0.7981
Tau	124.4	1.151
Span	0.1753	0.06037
Std. Error
Y0	0.009202	0.0333
Plateau	0.6224	0.01723
K	0.03589	1.241
Span	0.6178	0.03695
95% CI (profile likelihood)
Y0	0.3289 to 0.3679	0.3443 to 0.4771
Plateau	-infinity to 0.3126	-infinity to 0.3801
K	??? to 0.2116	??? to +infinity
Half Life	3.276 to ???
Tau	4.726 to ???
Goodness of Fit
Degrees of Freedom	18	18
R square	0.4441	0.1306
Absolute Sum of Squares	0.01414	0.06097
Sy.x	0.02802	0.0582
Constraints
K	K > 0	K > 0
Number of points
# of X values	21	21
# Y values analyzed	21	21

## Sheet: FigS5E
Time post addition (Min)	Reaction 1			Reaction 2			Reaction 3			Reaction 4
0	0.0162759	-0.0243426	0.00574623	0.0224628	0.00441302	0.00998241	0.00171641	0	0.000703974	0.00245159	0.00103718	0.00124377
10	0.0249207	0.0313486	0.0068164	0.0201933	0.00398885	0	0.0253758	0.0238525	0.02047	0.00098838	0	0.0005731
30	0.0405611	0.0151542	0.0267618	0.0161588	0.00774039	0	0.0528625	0.018859	0.0391789	0.000439363	0.00197206	0.00260757
60	0.0430324	0.0397517	0.0189607	0.0101612	0.00335048	0.00221251	0.0564209	0.0388572	0.0304073	0	0	0.0021129
Calculated Fit
	Reaction 1	Reaction 2	Reaction 3	Reaction 4
One-phase association				Not converged
Best-fit values
Y0	-0.0005109	0.01204	0.0009367
Plateau	0.03198	0.005961	0.04186
K	0.0993	0.07406	0.07641
Tau	10.07	13.5	13.09
Half-time	6.981	9.359	9.071
Span	0.03249	-0.00608	0.04092
Std. Error
Y0	0.008404	0.004577	0.005895
Plateau	0.007323	0.00478	0.006014
K	0.08903	0.2063	0.04031
Span	0.0108	0.006215	0.00794
95% CI (profile likelihood)
Y0	-0.01971 to 0.01862	0.003724 to 0.02271	-0.01251 to 0.01419
Plateau	0.01759 to +infinity	-infinity to 0.01307	0.03034 to 0.1111
K	??? to +infinity	??? to +infinity	0.007879 to 0.4936
Tau			2.026 to 126.9
Half-time			1.404 to 87.98
Goodness of Fit
Degrees of Freedom	9	9	9
R square	0.5112	0.1037	0.7611
Absolute Sum of Squares	0.001917	0.0005766	0.0009547
Sy.x	0.01459	0.008004	0.0103
Constraints
K	K > 0	K > 0	K > 0	K > 0
Number of points
# of X values	12	12	12	12
# Y values analyzed	12	12	12	12
