# Supplementary material for: RNA-dependent RNA targeting by CRISPR-Cas9
Source: eLife journal article supplement (doi:10.7554/elife.32724), 2018-01-05
Supplement: supp [file elife-32724-supp-v1.zip › elife_poa_e32724_Figure_2_source_data_1.xlsx]

## Sheet: Fig2C
Time	1			2			3			4			5			6			7			8			9			10			11			12
0	0.0100422	0.0122168	0.00583934	0.00787941	0.00987618	0.00530473	0.00505987	0.00692386	0.0036049	0.00787103	0.00605239	0.00363485	0.00798586	0.0068637	0.00853543	0.0106411	0.00827907	0.00575902	0.000507396	0.00622528	0.00914334	0	0.004765	0.0056307	0.00554088	0.00901465	0.00897459	0.000950616	0.00276502	0.00733072	0.00353421	0.00544751	0.00634129	0.00571243	0.0068059	0.00665586
1	0.0156865	0.0174373	0.00807334	0.005963	0.0148619	0.00900652	0.00546055	0.00544705	0.00426836	0.00288115	0.00321214	0.00552962	0.00807471	0.0047492	0.0116157	0.00970518	0.00372529	0.00473155	0.00176129	0.00436008	0.00733946	0.0487537	0.0642563	0.069568	0.0625512	0.0751332	0.0566697	0	0	0.00387259	0.00123881	0.00550574	0.00625912	0.00748552	0.00816682	0.00640455
2	0.027595	0.030436	0.0192122	0.0183802	0.0146736	0.011357	0.00429331	0.00753417	0.00537107	0	0.00457739	0.0057184	0.00307013	0.00248315	0.0100513	0.0108491	0.00713926	0.00278276	0.000721154	0.00286056	0.00546411	0.184795	0.32751	0.216262	0.139607	0.216206	0.181456	0.00359375	0.00365818	0.00894884	0	0.00410357	0.00635151	0.00856128	0.0123309	0.018716
5	0.0694899	0.0883124	0.0757828	0.0648736	0.070695	0.0656057	0.00448392	0.00568053	0.00174435	0	0.00680414	0.00146311	0.0042309	0.00674193	0	0.00875833	0.00182481	0.00356119	0.00576041	0.0172473	0.0152327	0.541338	0.542612	0.589111	0.483102	0.514135	0.439814	0.00135487	0.00664323	0.00769307	0.000442191	0.00671735	0.00686836	0.0395983	0.0405295	0.0457832
10	0.159656	0.173416	0.130487	0.180923	0.174609	0.149689	0.00474217	0.00229399	0	0	0.00982681	0	0.00285933	0.00316667	0	0.00660196	0.00401123	0.00229609	0.00764439	0.0203244	0.0222449	0.693537	0.726919	0.779684	0.616478	0.633437	0.615679	0.000803428	0.00798349	0.00082684	0	0.00515614	0.00615276	0.101156	0.0901909	0.0951398
30	0.45697	0.383077	0.367634	0.416554	0.389673	0.390467	0.00519623	0.00637045	0	0	0.00676929	0	0.00246407	0.00303528	0	0.00501841	0.00963237	0	0.0273769	0.033712	0.0305154	0.732897	0.749851	0.765226	0.727217	0.733007	0.723319	0	0.00678795	0	0	0.00359975	0.00627584	0.266099	0.181005	0.17767
60	0.366262	0.294826	0.332569	0.394562	0.451585	0.358437	0.00667443	0.00669845	0	0.00625168	0.00909299	0	0.00238956	0.00394299	0	0.0108891	0.00779523	0	0.0502508	0.0393938	0.0342251	0.695585	0.690862	0.658429	0.771208	0.761334	0.775524	0	0.00741609	0	0	0.00461456	0.00835031	0.125185	0.130723	0.140441
120	0.27769	0.219543	0.247876	0.287267	0.293041	0.261232	0.0071233	0.00457341	0	0.00898429	0.0108061	0.00270982	0.00763548	0.0102514	0.00708116	0.0044372	0.0111594	0.000650457	0.0489069	0.0461611	0.048567	0.689807	0.52422	0.613015	0.70467	0.643839	0.701785	0.00358346	0.00818757	0.00143021	0	0.00785552	0.00823726	0.134281	0.164089	0.121948
Substrate	Fraction cleaved	SD	Notes:
1	0.3243	0.02167
2	0.3635	0.02073
3	0.003701	0.0007532	ns
4	Poor Fit		ns
5	0.003509	0.0009217	ns
6	0.005149	0.001001	ns
7	0.04853	0.003249
8	0.7026	0.02322
9	0.7304	0.01379
10	0.003583	0.0009071	ns
11	0.004167	0.0007366	ns
12	0.1585	0.01167
Any cleavage less than 1% is deemed to be nonsignificant

## Sheet: Fig2D
Guide (nM)	1			2			3			4			5			6			7			8			9			10			11			12
0	0	0.00573725	0.00959509	0	0.00424541	0.00639382	0.0011271	0	0.00206496	0.000182781	0	0.0031762	0.00188807	0	0.00452108	0.000665034	0.00340028	0.000869736	8.33396e-05	0	0.000139276	0.00206162	0.00636521	0.00241428	0.00500289	0.00564052	0.00741324	0.00185346	0	0.00105347	0	0.000350258	0.000869036	0.00108635	0	0
0.002	0	0.0021927	0.00568247	0	0.00421282	0.00454734	0	0.00380143	0	0	0	0	0.000803514	0.00481042	0.000208535	0.000935191	0	0	0.00277648	0.00090021	5.25936e-05	0.00586531	0.00173578	0.0017858	0.0048473	0.00132508	0.00341824	0	0.000298636	0	0.000645247	0	0.000368527	0.00350658	0	0
0.02	0	0.00874504	0	0.00122852	0.00647454	0.00111861	0	0.00549606	0.00197953	0.0026316	0.00101216	0.00319962	0.0013087	0.013511	0	0.00102984	0.00192449	0.000492891	0.00237008	0.00253074	0.00325264	0.00492237	0.000499877	0.00700493	0.00484942	0	0.0115583	0.000317909	0	0.000991111	0.000791838	0	0.00109734	0.00168283	0.000595594	0.000327392
0.2	0.00311232	0.0104631	0.000935762	0	0.0027639	0.0102214	0	0.000627796	0.000300808	0	0.00306163	0	0.00641473	0	0	0.00171487	0.0019683	0.000419365	0.00564874	0	9.96086e-05	0.0128719	0.0201758	0.0188992	0.0112963	0.00860446	0.0152045	0	0.00251322	0.00225492	0.000834823	0.00490056	0	0.000898478	0.00467916	0.000592073
2	0.00155979	0.106805	0.1583	0	0.0486871	0.053417	0	0.00826306	0	0.00311721	0.00800857	0.00586944	0	0.00276906	0.00233643	0	0	0.00227892	0.00893274	0.00808564	0.0154571	0.0965729	0.136368	0.191285	0.0828138	0.111411	0.126429	0	0	0.000847134	0.00370916	0.00199895	0.000915211	0.0153991	0.0146509	0.00300667
20	0.454173	0.547458	0.625135	0.240249	0.298004	0.340464	0.0064943	0.00351405	0.00617943	0.00702884	0.00412539	0.00938248	0.00545684	0.00388488	0.00793856	0.00612631	0.00138857	0.00581116	0.129776	0.112529	0.142443	0.780095	0.728796	0.795897	0.605973	0.531352	0.542263	0.00578837	0.00323643	0.00530026	0.0128226	0.00629118	0.00483854	0.126126	0.1341	0.0727562
200	0.767237	0.741256	0.810272	0.688514	0.67841	0.729792	0.0169406	0.00463664	0.01492	0.0320839	0.0207474	0.0246259	0.0241367	0	0.0150897	0.0206246	0.0134414	0.0138228	0.798139	0.741716	0.748536	0.930458	0.920562	0.899786	0.851564	0.798352	0.795734	0.024365	0.0107127	0.0167887	0.0407164	0.03448	0.0290392	0.703472	0.664461	0.669717
Substrate	Kd Mean	SD
1	11.64	1.796
2	36.95	3.361
3	Poor fit
4	Poor fit
5	Poor fit
6	Poor fit
7	246	34.04
8	7.645	0.9401
9	11.68	0.8334
10	Poor fit
11	Poor fit
12	264.4	50.23
