# Supplementary material for: RNA-dependent RNA targeting by CRISPR-Cas9
Source: eLife journal article supplement (doi:10.7554/elife.32724), 2018-01-05
Supplement: supp [file elife-32724-supp-v1.zip › elife_poa_e32724_Figure_3_figure_supplement_1_source_data_1.xlsx]

## Sheet: FigS6A
MOI 10						MOI 100							20	21	22	23
sgRNA	logFC	Sequence	Length	Type		sgRNA	logFC	Sequence	Length	Type		MOI10	61	27	19	21
M45	3.20826	CCCGGGTCCTCTCTTTAGGG	20	MS2 targeting		M45	3.52609	CCCGGGTCCTCTCTTTAGGG	20	MS2 targeting		MOI100	76	48	25	12
M48	3.8839	GGGTCCTCTCTTTAGGGGGA	20	MS2 targeting		M292	2.16925	AGTATGGAACCACGCTATGT	20	MS2 targeting		Untreated libraries	3242	2628	2234	1303
M292	2.45486	AGTATGGAACCACGCTATGT	20	MS2 targeting		M601	3.5025	GGCGAAGAGATTGTCAACAG	20	MS2 targeting
M519	3.94807	GTACCCACACCTTATAGAGG	20	MS2 targeting		M602	3.44973	GCGAAGAGATTGTCAACAGG	20	MS2 targeting
M556	2.30753	TCCGACAACTCCCCAACCCC	20	MS2 targeting		M612	3.24925	TGTCAACAGGTTTCTTGATG	20	MS2 targeting
M611	3.33901	TTGTCAACAGGTTTCTTGAT	20	MS2 targeting		M792	2.99746	CGTAGATGCCTATGGTTCCG	20	MS2 targeting
M616	4.91886	AACAGGTTTCTTGATGTAAA	20	MS2 targeting		M896	2.99788	GTGGAAAATAGTTCCCATCG	20	MS2 targeting
M719	4.39487	GGTTTAAAACCGTAGTAGGC	20	MS2 targeting		M905	2.96603	AGTTCCCATCGTATCGTCTC	20	MS2 targeting
M806	2.59418	GTTCCGGCGTTACCAAAATG	20	MS2 targeting		M1101	5.01715	CATTCAGGTCTATACCAACG	20	MS2 targeting
M907	2.48072	TTCCCATCGTATCGTCTCGC	20	MS2 targeting		M1121	3.95339	GATTTGAGCCGGCGTCTGAT	20	MS2 targeting
M957	5.61537	GATCGAGATATGAATATAGC	20	MS2 targeting		M1152	4.19507	CCCCTTTCTGGAGGTACATA	20	MS2 targeting
M1161	2.41533	GGAGGTACATATTCATATCA	20	MS2 targeting		M1153	4.33117	CCCTTTCTGGAGGTACATAT	20	MS2 targeting
M1196	3.5018	GCCCGATCTATTTTATTATT	20	MS2 targeting		M1161	2.24528	GGAGGTACATATTCATATCA	20	MS2 targeting
M1198	3.31635	CCGATCTATTTTATTATTCT	20	MS2 targeting		M1195	3.59677	AGCCCGATCTATTTTATTAT	20	MS2 targeting
M1204	5.29002	TATTTTATTATTCTTCGGAA	20	MS2 targeting		M1196	2.66891	GCCCGATCTATTTTATTATT	20	MS2 targeting
M1206	3.00955	TTTTATTATTCTTCGGAACT	20	MS2 targeting		M1198	2.93284	CCGATCTATTTTATTATTCT	20	MS2 targeting
M1207	3.71762	TTTATTATTCTTCGGAACTG	20	MS2 targeting		M1258	4.25072	TTCATATGACTCGTTATAGC	20	MS2 targeting
M1220	3.61521	GGAACTGTAAACACTCCGTT	20	MS2 targeting		M1365	3.5116	CGAACTTCTTGTAAGGCGCT	20	MS2 targeting
M1259	2.97292	TCATATGACTCGTTATAGCG	20	MS2 targeting		M1394	4.125	AACTTGTGCCCCATAGGAGC	20	MS2 targeting
M1541	3.37471	CCTTCTCTATTTATCTGACC	20	MS2 targeting		M1449	4.52428	ATCGGTAGCCAGAGAGGAGG	20	MS2 targeting
M1634	3.44142	AAGGTCGGATGCTTTGTGAG	20	MS2 targeting		M1541	3.49023	CCTTCTCTATTTATCTGACC	20	MS2 targeting
M1748	2.01036	AGAGAAAGATCGCGAGGAAG	20	MS2 targeting		M1612	2.97188	CGCCTCGTCATTACCAGAAC	20	MS2 targeting
M1754	4.51759	AGATCGCGAGGAAGATCAAT	20	MS2 targeting		M1613	3.67004	GCCTCGTCATTACCAGAACC	20	MS2 targeting
M1756	4.22011	ATCGCGAGGAAGATCAATAC	20	MS2 targeting		M1617	3.22522	CGTCATTACCAGAACCTAAG	20	MS2 targeting
M1788	5.84833	ACTTCTTTGTTGTCTTCGAC	20	MS2 targeting		M1732	3.04987	TGATTGGTAAATTTCGAGAG	20	MS2 targeting
M1812	3.03308	GTAATCCTCATGTTTGAATG	20	MS2 targeting		M1748	2.50105	AGAGAAAGATCGCGAGGAAG	20	MS2 targeting
M1894	3.5196	TTTTAGGAGACCTTGCATTG	20	MS2 targeting		M1760	3.20379	CGAGGAAGATCAATACATAA	20	MS2 targeting
M1941	2.65207	TCGTAGCGAAAATTGGAATG	20	MS2 targeting		M1761	2.88558	GAGGAAGATCAATACATAAA	20	MS2 targeting
M2053	2.77588	GATGGTGTATTTGCGATTCT	20	MS2 targeting		M1783	4.77904	GTTGAACTTCTTTGTTGTCT	20	MS2 targeting
M2126	2.62136	TTAGAGCTGATCCATTCAGC	20	MS2 targeting		M1786	3.35821	GAACTTCTTTGTTGTCTTCG	20	MS2 targeting
M2572	3.164	TTTTCCCACACTATACCTAG	20	MS2 targeting		M1876	4.92184	GGGAATCGGGTTTCCATCTT	20	MS2 targeting
M2745	2.55364	ACGTACGGCTCTCATAGGAA	20	MS2 targeting		M1962	3.07509	TTAGTTCCATATTTAAGTAC	20	MS2 targeting
M3096	2.65322	TTCGATGTAAGTCAAGTTTT	20	MS2 targeting		M2057	3.1249	GTGTATTTGCGATTCTGCGC	20	MS2 targeting
M3124	3.4741	GGGAAGAGGCTGTAGCAGGA	20	MS2 targeting		M2126	2.49657	TTAGAGCTGATCCATTCAGC	20	MS2 targeting
M3210	3.89717	TCGCTTGTAGGCACCTTGAT	20	MS2 targeting		M2287	2.30376	GCTAACGCATCTAAGGTATG	20	MS2 targeting
M3268	3.04023	GAGGGGTAGTGCCACTGTTT	20	MS2 targeting		M2376	3.44185	GGCTGAGATTTGGGCCTTAG	20	MS2 targeting
M3293	2.9457	TGGCCCCAGTCGAGTTAAAA	20	MS2 targeting		M2575	2.87622	TCCCACACTATACCTAGTGG	20	MS2 targeting
M3404	3.40548	TCTCGTTCTCCCTATCAAGG	20	MS2 targeting		M2592	4.06752	TGGGTTCAAGATACCTAGAG	20	MS2 targeting
M3406	4.29482	TCGTTCTCCCTATCAAGGGT	20	MS2 targeting		M2673	2.54156	GTTGCACGTTGTCTGGAAGT	20	MS2 targeting
M3415	5.59438	CTATCAAGGGTACTAAAAGC	20	MS2 targeting		M2745	2.18514	ACGTACGGCTCTCATAGGAA	20	MS2 targeting
M3501	3.4142	CGCTAAAGACATTAAAAATG	20	MS2 targeting		M2785	3.69513	TTCGTAAGCATCTCATATGC	20	MS2 targeting
M3611	2.61512	GGGGGAGGTCCCTGGGCCGAA	21	MS2 targeting		M3003	3.20187	GGCCTCTGCTAAAGCAACAC	20	MS2 targeting
M3615	2.25241	GAGGTCCCTGGGCCGAAGCCC	21	MS2 targeting		M3096	4.24756	TTCGATGTAAGTCAAGTTTT	20	MS2 targeting
M4250	4.48402	AACGTTTTACGAAGATTCGGT	21	MS2 targeting		M3202	5.57099	GACCCACTTCGCTTGTAGGC	20	MS2 targeting
M4327	4.64713	TATAATATCGTCCCCGTAGAT	21	MS2 targeting		M3207	4.61525	ACTTCGCTTGTAGGCACCTT	20	MS2 targeting
M4726	4.05566	ATCAGGCTCCTTACAGGCAGC	21	MS2 targeting		M3210	5.04487	TCGCTTGTAGGCACCTTGAT	20	MS2 targeting
M4744	5.24731	AGCCCGATCTATTTTATTATT	21	MS2 targeting		M3220	4.93271	GCACCTTGATCTATCGATGT	20	MS2 targeting
M5116	4.16554	ACCATTCGCCTCCCGTAGCTT	21	MS2 targeting		M3329	3.42825	TCGAACGATATTTTAAAGAG	20	MS2 targeting
M5341	4.25502	CTTTGTTGTCTTCGACATGGG	21	MS2 targeting		M3366	3.40439	CTCACCGTCCGCGTAAACGC	20	MS2 targeting
M5431	4.62434	CGGGTTTCCATCTTTTAGGAG	21	MS2 targeting		M3404	2.92493	TCTCGTTCTCCCTATCAAGG	20	MS2 targeting
M5519	4.41011	ATATTTAAGTACGAACGCCAT	21	MS2 targeting		M3413	3.44904	CCCTATCAAGGGTACTAAAA	20	MS2 targeting
M5675	3.0777	TTAGAGCTGATCCATTCAGCG	21	MS2 targeting		M3419	3.51447	CAAGGGTACTAAAAGCTCGC	20	MS2 targeting
M5999	5.51531	ACTCACCCGTTATTACGTCAG	21	MS2 targeting		M3421	4.8591	AGGGTACTAAAAGCTCGCAC	20	MS2 targeting
M6097	3.50703	TCGACAACGAATGAGAAAGGC	21	MS2 targeting		M3501	2.75844	CGCTAAAGACATTAAAAATG	20	MS2 targeting
M6831	6.36118	CTGTTTCGTTTTGGCCCCAGT	21	MS2 targeting		M3523	3.89553	ATTAGCTCGACAGGAAGTTG	20	MS2 targeting
M6874	3.62314	CAGTTCGAACGATATTTTAAA	21	MS2 targeting		M3615	2.19452	GAGGTCCCTGGGCCGAAGCCC	21	MS2 targeting
M6885	5.20831	ATATTTTAAAGAGAATGAGTT	21	MS2 targeting		M4337	4.92892	TCCCCGTAGATGCCTATGGTT	21	MS2 targeting
M7176	4.53655	CGAAGCCCGCCCACCTTTCGGT	22	MS2 targeting		M4442	4.57949	ATTGTGGAAAATAGTTCCCAT	21	MS2 targeting
M7714	4.72495	ACAGGTTTCTTGATGTAAAACG	22	MS2 targeting		M4532	3.66518	GGGAGAAAACTCCACACCAGG	21	MS2 targeting
M7977	4.02181	GAACCCATTTCCCATTGTGGAA	22	MS2 targeting		M4735	3.27509	CTTACAGGCAGCCCGATCTAT	21	MS2 targeting
M7990	3.28012	ATTGTGGAAAATAGTTCCCATC	22	MS2 targeting		M4746	4.45305	CCCGATCTATTTTATTATTCT	21	MS2 targeting
M8197	4.50179	TCATTCAGGTCTATACCAACGG	22	MS2 targeting		M4785	4.35369	CGTTCCCTACAACGAGCCTAA	21	MS2 targeting
M8267	3.36399	TATTCATATCAGGCTCCTTACA	22	MS2 targeting		M4786	6.38885	GTTCCCTACAACGAGCCTAAA	21	MS2 targeting
M8268	4.49237	ATTCATATCAGGCTCCTTACAG	22	MS2 targeting		M4903	3.8851	TGCTTGTTCAGCGAACTTCTT	21	MS2 targeting
M8579	5.14519	TACGGATGCTGGTTTGTAAAAC	22	MS2 targeting		M5121	5.31599	TCGCCTCCCGTAGCTTAGCGA	21	MS2 targeting
M8750	4.92871	GCAATTCGTCCCTTAAGTAAGC	22	MS2 targeting		M5202	5.1161	GCAATTCGTCCCTTAAGTAAG	21	MS2 targeting
M8832	5.5422	TTGGTAAATTTCGAGAGAAAGA	22	MS2 targeting		M5207	2.78787	TCGTCCCTTAAGTAAGCAATT	21	MS2 targeting
M8836	3.78752	TAAATTTCGAGAGAAAGATCGC	22	MS2 targeting		M5296	3.96923	GAGAGAAAGATCGCGAGGAAG	21	MS2 targeting
M8878	6.27192	GAGTTGAACTTCTTTGTTGTCT	22	MS2 targeting		M5363	2.647	AATCCTCATGTTTGAATGGCC	21	MS2 targeting
M9546	2.8561	GACTCACCCGTTATTACGTCAG	22	MS2 targeting		M5372	3.72555	GTTTGAATGGCCGGCGTCTAT	21	MS2 targeting
M9663	5.39037	GGCACCTTTTCCCACACTATAC	22	MS2 targeting		M5715	6.38057	TTGGGGCGACAGTCACGTCGC	21	MS2 targeting
M9880	6.89476	CCTTCGTAAGCATCTCATATGC	22	MS2 targeting		M5785	3.98701	GCTTCAAACTCCGGTTGAGGG	21	MS2 targeting
M10305	4.50855	CTTCGCTTGTAGGCACCTTGAT	22	MS2 targeting		M5800	4.44712	TGAGGGCTCTATCTAGAGAGC	21	MS2 targeting
M10327	6.7652	CTATCGATGTGACACTTAACGC	22	MS2 targeting		M6186	5.72339	GTTTATGTAAAACCATATCAC	21	MS2 targeting
M10509	4.64876	TCCCTATCAAGGGTACTAAAAG	22	MS2 targeting		M6492	3.67757	GGCAGTGTACGCCTTCACGAG	21	MS2 targeting
M10658	6.14822	GCCAAGCAGCTAGTTACCAAATC	23	MS2 targeting		M6763	3.54471	TTGTAGGCACCTTGATCTATC	21	MS2 targeting
M11033	4.66926	GTATCCGCGAGCAGCCGCCCGTA	23	MS2 targeting		M6878	5.51226	TCGAACGATATTTTAAAGAGA	21	MS2 targeting
M11543	4.23781	GAAAATAGTTCCCATCGTATCGT	23	MS2 targeting		M6954	3.81804	CTCGTTCTCCCTATCAAGGGT	21	MS2 targeting
M11845	5.71124	ATCTATTTTATTATTCTTCGGAA	23	MS2 targeting		M7010	2.4187	GGAATTCCGGCTACCTACAGC	21	MS2 targeting
M12541	5.27417	TAGGAGACCTTGCATTGCCTTAA	23	MS2 targeting		M7063	2.56006	AAAAATGGCATTAGCTCGACA	21	MS2 targeting
M12997	4.40402	ACGGATTGTACCCCTCGATGCAT	23	MS2 targeting		M7136	5.87373	GAGAATCCCGGGTCCTCTCTTT	22	MS2 targeting
M13236	4.54975	TGGGTTCAAGATACCTAGAGACG	23	MS2 targeting		M7242	4.68631	CCCCGTTTACGGGGGTCCCTCG	22	MS2 targeting
M13851	3.77433	ACTTCGCTTGTAGGCACCTTGAT	23	MS2 targeting		M7682	5.78634	TTAATATCAGCATCAGGGCGAA	22	MS2 targeting
M14044	5.26913	AAGGTCTCGTTCTCCCTATCAAG	23	MS2 targeting		M7701	2.72906	GAAGAGATTGTCAACAGGTTTC	22	MS2 targeting
M14210	3.0839	TACGGACCGGTCTCAGGGAATT	22	Control		M7723	5.11298	TTGATGTAAAACGGTTTGACAT	22	MS2 targeting
M14238	5.12078	TATACCGCTTTCAGTTTTCATTT	23	Control		M7818	3.10076	TTTAAAACCGTAGTAGGCAAGT	22	MS2 targeting
M14734	3.92913	GTCAAGGCTTCTTATTATTTTAT	23	Control		M7990	4.45112	ATTGTGGAAAATAGTTCCCATC	22	MS2 targeting
M14945	2.50199	GAGGTCCCTGGGCCGGAGCCCGC	23	SNP		M8254	4.59312	TTCTGGAGGTACATATTCATAT	22	MS2 targeting
M14950	2.52227	GAGGTCCCTGGGCCGAAACCCGC	23	SNP		M8268	4.44634	ATTCATATCAGGCTCCTTACAG	22	MS2 targeting
M14956	2.34245	GAGGTCCCTGGGCCGAAGCACGC	23	SNP		M8295	5.84663	CCGATCTATTTTATTATTCTTC	22	MS2 targeting
M15119	2.75649	TTAGAGGTGATCCATTCAGCG	21	SNP		M8457	3.80702	TTCAGCGAACTTCTTGTAAGGC	22	MS2 targeting
M15120	3.22749	TTAGAGTTGATCCATTCAGCG	21	SNP		M8824	3.82841	GCAATTGATTGGTAAATTTCGA	22	MS2 targeting
M15121	3.35235	TTAGAGCAGATCCATTCAGCG	21	SNP		M8835	5.00503	GTAAATTTCGAGAGAAAGATCG	22	MS2 targeting
M15122	3.89443	TTAGAGCCGATCCATTCAGCG	21	SNP		M8978	4.57106	TCGGGTTTCCATCTTTTAGGAG	22	MS2 targeting
M15126	2.99008	TTAGAGCTTATCCATTCAGCG	21	SNP		M9485	2.67256	GGCCTTAGCAGTGCCCTGTCTC	22	MS2 targeting
M15152	2.97586	TTAGAGCTGATCCATTCGGCG	21	SNP		M9787	4.53253	AGTTTGCAGCTGGATACGACAG	22	MS2 targeting
M15172	3.83596	AGTCTGGAACCACGCTATGT	20	SNP		M9989	2.54821	TTCGTTTAGGGCAAGGTAGCGG	22	MS2 targeting
M15183	3.37012	AGTATGTAACCACGCTATGT	20	SNP		M10305	3.81337	CTTCGCTTGTAGGCACCTTGAT	22	MS2 targeting
M15196	3.06025	AGTATGGAACCCCGCTATGT	20	SNP		M10431	5.14124	CGATATTTTAAAGAGAATGAGT	22	MS2 targeting
M15199	2.97702	AGTATGGAACCAAGCTATGT	20	SNP		M10471	3.8183	CCGCGTAAACGCGAACGGAGGG	22	MS2 targeting
M15219	3.46476	AGTATGGAACCACGCTATTT	20	SNP		M10687	7.04854	ATCCCGGGTCCTCTCTTTAGGGG	23	MS2 targeting
M15279	4.44219	ACGGATGCTGGTTTGTAATACA	22	SNP		M11770	3.73477	GAGCCGGCGTCTGATGAAAGCAC	23	MS2 targeting
M15303	2.74526	GCTATCGCATCTAAGGTATGG	21	SNP		M11888	7.03224	ACAACGAGCCTAAATTCATATGA	23	MS2 targeting
M15315	3.13084	GCTAACGCTTCTAAGGTATGG	21	SNP		M12466	4.66889	TGTTTGAATGGCCGGCGTCTATT	23	MS2 targeting
M16039	4.1857	GCATCTAAGGTATAGACCATCGA	23	SNP		M12585	5.54128	TCGTAGCGAAAATTGGAATGGTT	23	MS2 targeting
M16428	3.9682	CGGATTGTACCCCTTGATGC	20	SNP		M12588	3.74783	TAGCGAAAATTGGAATGGTTAGT	23	MS2 targeting
M16474	4.00085	GTCGGTGATTACACCTCCAGTAT	23	SNP		M13851	3.30603	ACTTCGCTTGTAGGCACCTTGAT	23	MS2 targeting
M17304	3.31066	AGAGTAAGATCGCGAGGAAG	20	SNP		M14210	3.42936	TACGGACCGGTCTCAGGGAATT	22	Control
M17311	3.25519	AGAGAAAAATCGCGAGGAAG	20	SNP		M14238	5.2338	TATACCGCTTTCAGTTTTCATTT	23	Control
M17313	2.88451	AGAGAAATATCGCGAGGAAG	20	SNP		M14281	5.53574	GTACGACATATACGCAGGGTGA	22	Control
M17316	3.07682	AGAGAAAGTTCGCGAGGAAG	20	SNP		M14483	5.98331	TTGCGGAATACCTTATCAAC	20	Control
M17317	2.2745	AGAGAAAGAACGCGAGGAAG	20	SNP		M14551	3.95562	GCGGGACTACGACTATAATTTAG	23	Control
M17319	2.68385	AGAGAAAGAGCGCGAGGAAG	20	SNP		M14966	4.55313	GAGGTCCCTGGGCCGAAGCCCGG	23	SNP
M17320	2.6442	AGAGAAAGATAGCGAGGAAG	20	SNP		M14991	3.81338	CTCATAGTAAGAAACTCTTGAA	22	SNP
M17322	2.57005	AGAGAAAGATTGCGAGGAAG	20	SNP		M15120	3.66778	TTAGAGTTGATCCATTCAGCG	21	SNP
M17328	3.6881	AGAGAAAGATCGTGAGGAAG	20	SNP		M15124	3.62197	TTAGAGCTAATCCATTCAGCG	21	SNP
M17330	2.46506	AGAGAAAGATCGCCAGGAAG	20	SNP		M15139	3.99865	TTAGAGCTGATCCCTTCAGCG	21	SNP
M17588	2.82558	GGAGGGGACGAAGGCCTCGTTCT	23	SNP		M15148	3.62998	TTAGAGCTGATCCATTAAGCG	21	SNP
M17703	2.4843	GAAGAGATTTTCAACAGGTT	20	SNP		M15152	3.41974	TTAGAGCTGATCCATTCGGCG	21	SNP
M17716	2.09049	GAAGAGATTGTCAAAAGGTT	20	SNP		M15164	4.03276	GGTATGGAACCACGCTATGT	20	SNP
M17718	2.29972	GAAGAGATTGTCAATAGGTT	20	SNP		M15193	3.42248	AGTATGGAACAACGCTATGT	20	SNP
M17725	2.27088	GAAGAGATTGTCAACAGATT	20	SNP		M15200	2.9446	AGTATGGAACCAGGCTATGT	20	SNP
M17881	2.43245	TTGAGAAGGACCCCGAAAGGG	21	SNP		M15203	5.40402	AGTATGGAACCACCCTATGT	20	SNP
M18032	2.45833	GAAGAGATTGTCAAGAGGTTT	21	SNP		M15219	2.38044	AGTATGGAACCACGCTATTT	20	SNP
M18036	2.65695	GAAGAGATTGTCAACTGGTTT	21	SNP		M15220	2.49998	AGTATGGAACCACGCTATGA	20	SNP
						M15305	3.09065	GCTAAGGCATCTAAGGTATGG	21	SNP
						M15307	3.23204	GCTAACACATCTAAGGTATGG	21	SNP
						M15312	2.45285	GCTAACGTATCTAAGGTATGG	21	SNP
						M15313	2.28959	GCTAACGCCTCTAAGGTATGG	21	SNP
						M15315	2.76828	GCTAACGCTTCTAAGGTATGG	21	SNP
						M15320	2.91074	GCTAACGCATGTAAGGTATGG	21	SNP
						M15329	2.46726	GCTAACGCATCTAGGGTATGG	21	SNP
						M15351	2.71217	GCTAACGCATCTAAGGTATGT	21	SNP
						M15555	3.48165	ATCTATCTTGATGTTAGTACCG	22	SNP
						M15588	5.21516	ATCTAACTTGATGTTATTACCG	22	SNP
						M15630	2.8411	ACGTACGGTTCTCATAGGAAGA	22	SNP
						M15682	3.17432	GGCTATAGCAGGAGCGTGCGTC	22	SNP
						M16089	3.50134	ATGCCGTAGTTTGCTGCGAT	20	SNP
						M16102	2.54249	ATGCCGGAGTTAGCTGCGAT	20	SNP
						M16134	3.50148	GTGGGAGAAGCCGAAACCGGC	21	SNP
						M16413	3.34206	CGGATTGTATCCCTCGATGC	20	SNP
						M16721	3.82415	ACCAGCGGATTTGAGCCGGCG	21	SNP
						M17020	5.15344	CGAACGTTTTACGAAGATACGGT	23	SNP
						M17299	2.51694	AGAAAAAGATCGCGAGGAAG	20	SNP
						M17318	2.22537	AGAGAAAGACCGCGAGGAAG	20	SNP
						M17322	2.61574	AGAGAAAGATTGCGAGGAAG	20	SNP
						M17324	2.62563	AGAGAAAGATCCCGAGGAAG	20	SNP
						M17326	2.19064	AGAGAAAGATCGAGAGGAAG	20	SNP
						M17328	2.78422	AGAGAAAGATCGTGAGGAAG	20	SNP
						M17330	2.90119	AGAGAAAGATCGCCAGGAAG	20	SNP
						M17345	2.28695	AGAGAAAGATCGCGAGGAGG	20	SNP
						M17491	3.9823	CTATGATTCCGGCGTTACCAAAA	23	SNP
						M17527	3.07793	CTATGGTTCCGGCGTTAACAAAA	23	SNP
						M17586	2.83918	GGAGGGGACGAAGTTCTCGTTCT	23	SNP
						M17681	2.44151	GAGGAGATTGTCAACAGGTT	20	SNP
						M17703	2.49898	GAAGAGATTTTCAACAGGTT	20	SNP
						M17707	2.89471	GAAGAGATTGTAAACAGGTT	20	SNP
						M17871	2.63906	TGGAGCAGGACCCCGAAAGGG	21	SNP
						M17877	2.49276	TTGTGCAGGACCCCGAAAGGG	21	SNP
						M17878	2.74719	TTGAACAGGACCCCGAAAGGG	21	SNP
						M17908	2.46616	TTGAGCAGGACCCCAAAAGGG	21	SNP
						M17973	3.59373	CAGTATGGAACCACTCTATG	20	SNP
						M18037	2.44828	GAAGAGATTGTCAACAAGTTT	21	SNP
						M18046	2.61545	GAAGAGATTGTCAACAGGTAT	21	SNP
						M18047	2.20732	GAAGAGATTGTCAACAGGTCT	21	SNP

## Sheet: FigS6B
N's added to 5' end to align all sequences at the 3' end
MOI-10			MOI-100
GCCAAGCAGCTAGTTACCAAATC			ATCCCGGGTCCTCTCTTTAGGGG
GTATCCGCGAGCAGCCGCCCGTA			GAGCCGGCGTCTGATGAAAGCAC
GAAAATAGTTCCCATCGTATCGT			ACAACGAGCCTAAATTCATATGA
ATCTATTTTATTATTCTTCGGAA			TGTTTGAATGGCCGGCGTCTATT
TAGGAGACCTTGCATTGCCTTAA			TCGTAGCGAAAATTGGAATGGTT
ACGGATTGTACCCCTCGATGCAT			TAGCGAAAATTGGAATGGTTAGT
TGGGTTCAAGATACCTAGAGACG			ACTTCGCTTGTAGGCACCTTGAT
ACTTCGCTTGTAGGCACCTTGAT			NGAGAATCCCGGGTCCTCTCTTT
AAGGTCTCGTTCTCCCTATCAAG			NCCCCGTTTACGGGGGTCCCTCG
NCGAAGCCCGCCCACCTTTCGGT			NTTAATATCAGCATCAGGGCGAA
NACAGGTTTCTTGATGTAAAACG			NGAAGAGATTGTCAACAGGTTTC
NGAACCCATTTCCCATTGTGGAA			NTTGATGTAAAACGGTTTGACAT
NATTGTGGAAAATAGTTCCCATC			NTTTAAAACCGTAGTAGGCAAGT
NTCATTCAGGTCTATACCAACGG			NATTGTGGAAAATAGTTCCCATC
NTATTCATATCAGGCTCCTTACA			NTTCTGGAGGTACATATTCATAT
NATTCATATCAGGCTCCTTACAG			NATTCATATCAGGCTCCTTACAG
NTACGGATGCTGGTTTGTAAAAC			NCCGATCTATTTTATTATTCTTC
NGCAATTCGTCCCTTAAGTAAGC			NTTCAGCGAACTTCTTGTAAGGC
NTTGGTAAATTTCGAGAGAAAGA			NGCAATTGATTGGTAAATTTCGA
NTAAATTTCGAGAGAAAGATCGC			NGTAAATTTCGAGAGAAAGATCG
NGAGTTGAACTTCTTTGTTGTCT			NTCGGGTTTCCATCTTTTAGGAG
NGACTCACCCGTTATTACGTCAG			NGGCCTTAGCAGTGCCCTGTCTC
NGGCACCTTTTCCCACACTATAC			NAGTTTGCAGCTGGATACGACAG
NCCTTCGTAAGCATCTCATATGC			NTTCGTTTAGGGCAAGGTAGCGG
NCTTCGCTTGTAGGCACCTTGAT			NCTTCGCTTGTAGGCACCTTGAT
NCTATCGATGTGACACTTAACGC			NCGATATTTTAAAGAGAATGAGT
NTCCCTATCAAGGGTACTAAAAG			NCCGCGTAAACGCGAACGGAGGG
NNGGGGGAGGTCCCTGGGCCGAA			NNGAGGTCCCTGGGCCGAAGCCC
NNGAGGTCCCTGGGCCGAAGCCC			NNTCCCCGTAGATGCCTATGGTT
NNAACGTTTTACGAAGATTCGGT			NNATTGTGGAAAATAGTTCCCAT
NNTATAATATCGTCCCCGTAGAT			NNGGGAGAAAACTCCACACCAGG
NNATCAGGCTCCTTACAGGCAGC			NNCTTACAGGCAGCCCGATCTAT
NNAGCCCGATCTATTTTATTATT			NNCCCGATCTATTTTATTATTCT
NNACCATTCGCCTCCCGTAGCTT			NNCGTTCCCTACAACGAGCCTAA
NNCTTTGTTGTCTTCGACATGGG			NNGTTCCCTACAACGAGCCTAAA
NNCGGGTTTCCATCTTTTAGGAG			NNTGCTTGTTCAGCGAACTTCTT
NNATATTTAAGTACGAACGCCAT			NNTCGCCTCCCGTAGCTTAGCGA
NNTTAGAGCTGATCCATTCAGCG			NNGCAATTCGTCCCTTAAGTAAG
NNACTCACCCGTTATTACGTCAG			NNTCGTCCCTTAAGTAAGCAATT
NNTCGACAACGAATGAGAAAGGC			NNGAGAGAAAGATCGCGAGGAAG
NNCTGTTTCGTTTTGGCCCCAGT			NNAATCCTCATGTTTGAATGGCC
NNCAGTTCGAACGATATTTTAAA			NNGTTTGAATGGCCGGCGTCTAT
NNATATTTTAAAGAGAATGAGTT			NNTTGGGGCGACAGTCACGTCGC
NNNCCCGGGTCCTCTCTTTAGGG			NNGCTTCAAACTCCGGTTGAGGG
NNNGGGTCCTCTCTTTAGGGGGA			NNTGAGGGCTCTATCTAGAGAGC
NNNAGTATGGAACCACGCTATGT			NNGTTTATGTAAAACCATATCAC
NNNGTACCCACACCTTATAGAGG			NNGGCAGTGTACGCCTTCACGAG
NNNTCCGACAACTCCCCAACCCC			NNTTGTAGGCACCTTGATCTATC
NNNTTGTCAACAGGTTTCTTGAT			NNTCGAACGATATTTTAAAGAGA
NNNAACAGGTTTCTTGATGTAAA			NNCTCGTTCTCCCTATCAAGGGT
NNNGGTTTAAAACCGTAGTAGGC			NNGGAATTCCGGCTACCTACAGC
NNNGTTCCGGCGTTACCAAAATG			NNAAAAATGGCATTAGCTCGACA
NNNTTCCCATCGTATCGTCTCGC			NNNCCCGGGTCCTCTCTTTAGGG
NNNGATCGAGATATGAATATAGC			NNNAGTATGGAACCACGCTATGT
NNNGGAGGTACATATTCATATCA			NNNGGCGAAGAGATTGTCAACAG
NNNGCCCGATCTATTTTATTATT			NNNGCGAAGAGATTGTCAACAGG
NNNCCGATCTATTTTATTATTCT			NNNTGTCAACAGGTTTCTTGATG
NNNTATTTTATTATTCTTCGGAA			NNNCGTAGATGCCTATGGTTCCG
NNNTTTTATTATTCTTCGGAACT			NNNGTGGAAAATAGTTCCCATCG
NNNTTTATTATTCTTCGGAACTG			NNNAGTTCCCATCGTATCGTCTC
NNNGGAACTGTAAACACTCCGTT			NNNCATTCAGGTCTATACCAACG
NNNTCATATGACTCGTTATAGCG			NNNGATTTGAGCCGGCGTCTGAT
NNNCCTTCTCTATTTATCTGACC			NNNCCCCTTTCTGGAGGTACATA
NNNAAGGTCGGATGCTTTGTGAG			NNNCCCTTTCTGGAGGTACATAT
NNNAGAGAAAGATCGCGAGGAAG			NNNGGAGGTACATATTCATATCA
NNNAGATCGCGAGGAAGATCAAT			NNNAGCCCGATCTATTTTATTAT
NNNATCGCGAGGAAGATCAATAC			NNNGCCCGATCTATTTTATTATT
NNNACTTCTTTGTTGTCTTCGAC			NNNCCGATCTATTTTATTATTCT
NNNGTAATCCTCATGTTTGAATG			NNNTTCATATGACTCGTTATAGC
NNNTTTTAGGAGACCTTGCATTG			NNNCGAACTTCTTGTAAGGCGCT
NNNTCGTAGCGAAAATTGGAATG			NNNAACTTGTGCCCCATAGGAGC
NNNGATGGTGTATTTGCGATTCT			NNNATCGGTAGCCAGAGAGGAGG
NNNTTAGAGCTGATCCATTCAGC			NNNCCTTCTCTATTTATCTGACC
NNNTTTTCCCACACTATACCTAG			NNNCGCCTCGTCATTACCAGAAC
NNNACGTACGGCTCTCATAGGAA			NNNGCCTCGTCATTACCAGAACC
NNNTTCGATGTAAGTCAAGTTTT			NNNCGTCATTACCAGAACCTAAG
NNNGGGAAGAGGCTGTAGCAGGA			NNNTGATTGGTAAATTTCGAGAG
NNNTCGCTTGTAGGCACCTTGAT			NNNAGAGAAAGATCGCGAGGAAG
NNNGAGGGGTAGTGCCACTGTTT			NNNCGAGGAAGATCAATACATAA
NNNTGGCCCCAGTCGAGTTAAAA			NNNGAGGAAGATCAATACATAAA
NNNTCTCGTTCTCCCTATCAAGG			NNNGTTGAACTTCTTTGTTGTCT
NNNTCGTTCTCCCTATCAAGGGT			NNNGAACTTCTTTGTTGTCTTCG
NNNCTATCAAGGGTACTAAAAGC			NNNGGGAATCGGGTTTCCATCTT
NNNCGCTAAAGACATTAAAAATG			NNNTTAGTTCCATATTTAAGTAC
			NNNGTGTATTTGCGATTCTGCGC
			NNNTTAGAGCTGATCCATTCAGC
			NNNGCTAACGCATCTAAGGTATG
			NNNGGCTGAGATTTGGGCCTTAG
			NNNTCCCACACTATACCTAGTGG
			NNNTGGGTTCAAGATACCTAGAG
			NNNGTTGCACGTTGTCTGGAAGT
			NNNACGTACGGCTCTCATAGGAA
			NNNTTCGTAAGCATCTCATATGC
			NNNGGCCTCTGCTAAAGCAACAC
			NNNTTCGATGTAAGTCAAGTTTT
			NNNGACCCACTTCGCTTGTAGGC
			NNNACTTCGCTTGTAGGCACCTT
			NNNTCGCTTGTAGGCACCTTGAT
			NNNGCACCTTGATCTATCGATGT
			NNNTCGAACGATATTTTAAAGAG
			NNNCTCACCGTCCGCGTAAACGC
			NNNTCTCGTTCTCCCTATCAAGG
			NNNCCCTATCAAGGGTACTAAAA
			NNNCAAGGGTACTAAAAGCTCGC
			NNNAGGGTACTAAAAGCTCGCAC
			NNNCGCTAAAGACATTAAAAATG
			NNNATTAGCTCGACAGGAAGTTG

## Sheet: FigS6C
sgRNA	Start	End	logFC
M45	3506	3525	3.52609
M292	3259	3278	2.16925
M601	2950	2969	3.5025
M602	2949	2968	3.44973
M612	2939	2958	3.24925
M792	2759	2778	2.99746
M896	2655	2674	2.99788
M905	2646	2665	2.96603
M1101	2450	2469	5.01715
M1121	2430	2449	3.95339
M1152	2399	2418	4.19507
M1153	2398	2417	4.33117
M1161	2390	2409	2.24528
M1195	2356	2375	3.59677
M1196	2355	2374	2.66891
M1198	2353	2372	2.93284
M1258	2293	2312	4.25072
M1365	2186	2205	3.5116
M1394	2157	2176	4.125
M1449	2102	2121	4.52428
M1541	2010	2029	3.49023
M1612	1939	1958	2.97188
M1613	1938	1957	3.67004
M1617	1934	1953	3.22522
M1732	1819	1838	3.04987
M1748	1803	1822	2.50105
M1760	1791	1810	3.20379
M1761	1790	1809	2.88558
M1783	1768	1787	4.77904
M1786	1765	1784	3.35821
M1876	1675	1694	4.92184
M1962	1589	1608	3.07509
M2057	1494	1513	3.1249
M2126	1425	1444	2.49657
M2287	1264	1283	2.30376
M2376	1175	1194	3.44185
M2575	976	995	2.87622
M2592	959	978	4.06752
M2673	878	897	2.54156
M2745	806	825	2.18514
M2785	766	785	3.69513
M3003	548	567	3.20187
M3096	455	474	4.24756
M3202	349	368	5.57099
M3207	344	363	4.61525
M3210	341	360	5.04487
M3220	331	350	4.93271
M3329	222	241	3.42825
M3366	185	204	3.40439
M3404	147	166	2.92493
M3413	138	157	3.44904
M3419	132	151	3.51447
M3421	130	149	4.8591
M3501	50	69	2.75844
M3523	28	47	3.89553
M3615	3484	3504	2.19452
M4337	2762	2782	4.92892
M4442	2657	2677	4.57949
M4532	2567	2587	3.66518
M4735	2364	2384	3.27509
M4746	2353	2373	4.45305
M4785	2314	2334	4.35369
M4786	2313	2333	6.38885
M4903	2196	2216	3.8851
M5121	1978	1998	5.31599
M5202	1897	1917	5.1161
M5207	1892	1912	2.78787
M5296	1803	1823	3.96923
M5363	1736	1756	2.647
M5372	1727	1747	3.72555
M5715	1384	1404	6.38057
M5785	1314	1334	3.98701
M5800	1299	1319	4.44712
M6186	913	933	5.72339
M6492	607	627	3.67757
M6763	336	356	3.54471
M6878	221	241	5.51226
M6954	145	165	3.81804
M7010	89	109	2.4187
M7063	36	56	2.56006
M7136	3510	3531	5.87373
M7242	3404	3425	4.68631
M7682	2964	2985	5.78634
M7701	2945	2966	2.72906
M7723	2923	2944	5.11298
M7818	2828	2849	3.10076
M7990	2656	2677	4.45112
M8254	2392	2413	4.59312
M8268	2378	2399	4.44634
M8295	2351	2372	5.84663
M8457	2189	2210	3.80702
M8824	1822	1843	3.82841
M8835	1811	1832	5.00503
M8978	1668	1689	4.57106
M9485	1161	1182	2.67256
M9787	859	880	4.53253
M9989	657	678	2.54821
M10305	341	362	3.81337
M10431	215	236	5.14124
M10471	175	196	3.8183
M10687	3505	3527	7.04854
M11770	2422	2444	3.73477
M11888	2304	2326	7.03224
M12466	1726	1748	4.66889
M12585	1607	1629	5.54128
M12588	1604	1626	3.74783
M13851	341	363	3.30603

## Sheet: FigS6D
sgRNA	Start	End	logFC
M45	3506	3525	3.20826
M48	3503	3522	3.8839
M292	3259	3278	2.45486
M519	3032	3051	3.94807
M556	2995	3014	2.30753
M611	2940	2959	3.33901
M616	2935	2954	4.91886
M719	2832	2851	4.39487
M806	2745	2764	2.59418
M907	2644	2663	2.48072
M957	2594	2613	5.61537
M1161	2390	2409	2.41533
M1196	2355	2374	3.5018
M1198	2353	2372	3.31635
M1204	2347	2366	5.29002
M1206	2345	2364	3.00955
M1207	2344	2363	3.71762
M1220	2331	2350	3.61521
M1259	2292	2311	2.97292
M1541	2010	2029	3.37471
M1634	1917	1936	3.44142
M1748	1803	1822	2.01036
M1754	1797	1816	4.51759
M1756	1795	1814	4.22011
M1788	1763	1782	5.84833
M1812	1739	1758	3.03308
M1894	1657	1676	3.5196
M1941	1610	1629	2.65207
M2053	1498	1517	2.77588
M2126	1425	1444	2.62136
M2572	979	998	3.164
M2745	806	825	2.55364
M3096	455	474	2.65322
M3124	427	446	3.4741
M3210	341	360	3.89717
M3268	283	302	3.04023
M3293	258	277	2.9457
M3404	147	166	3.40548
M3406	145	164	4.29482
M3415	136	155	5.59438
M3501	50	69	3.4142
M3611	3488	3508	2.61512
M3615	3484	3504	2.25241
M4250	2849	2869	4.48402
M4327	2772	2792	4.64713
M4726	2373	2393	4.05566
M4744	2355	2375	5.24731
M5116	1983	2003	4.16554
M5341	1758	1778	4.25502
M5431	1668	1688	4.62434
M5519	1580	1600	4.41011
M5675	1424	1444	3.0777
M5999	1100	1120	5.51531
M6097	1002	1022	3.50703
M6831	268	288	6.36118
M6874	225	245	3.62314
M6885	214	234	5.20831
M7176	3470	3491	4.53655
M7714	2932	2953	4.72495
M7977	2669	2690	4.02181
M7990	2656	2677	3.28012
M8197	2449	2470	4.50179
M8267	2379	2400	3.36399
M8268	2378	2399	4.49237
M8579	2067	2088	5.14519
M8750	1896	1917	4.92871
M8832	1814	1835	5.5422
M8836	1810	1831	3.78752
M8878	1768	1789	6.27192
M9546	1100	1121	2.8561
M9663	983	1004	5.39037
M9880	766	787	6.89476
M10305	341	362	4.50855
M10327	319	340	6.7652
M10509	137	158	4.64876
M10658	3534	3556	6.14822
M11033	3159	3181	4.66926
M11543	2649	2671	4.23781
M11845	2347	2369	5.71124
M12541	1651	1673	5.27417
M12997	1195	1217	4.40402
M13236	956	978	4.54975
M13851	341	363	3.77433
M14044	148	170	5.26913
