# Supplementary material for: RNA-dependent RNA targeting by CRISPR-Cas9
Source: eLife journal article supplement (doi:10.7554/elife.32724), 2018-01-05
Supplement: supp [file elife-32724-supp-v1.zip › elife_poa_e32724_Figure_3_figure_supplement_2_source_data_1.xlsx]

## Sheet: FigS7
MS2	Start	End	Sequence
M45	3506	3525	CCCGGGTCCTCTCTTTAGGG
M292	3259	3278	AGTATGGAACCACGCTATGT
M601	2950	2969	GGCGAAGAGATTGTCAACAG
M602	2949	2968	GCGAAGAGATTGTCAACAGG
M612	2939	2958	TGTCAACAGGTTTCTTGATG
M792	2759	2778	CGTAGATGCCTATGGTTCCG
M896	2655	2674	GTGGAAAATAGTTCCCATCG
M905	2646	2665	AGTTCCCATCGTATCGTCTC
M1101	2450	2469	CATTCAGGTCTATACCAACG
M1121	2430	2449	GATTTGAGCCGGCGTCTGAT
M1152	2399	2418	CCCCTTTCTGGAGGTACATA
M1153	2398	2417	CCCTTTCTGGAGGTACATAT
M1161	2390	2409	GGAGGTACATATTCATATCA
M1195	2356	2375	AGCCCGATCTATTTTATTAT
M1196	2355	2374	GCCCGATCTATTTTATTATT
M1198	2353	2372	CCGATCTATTTTATTATTCT
M1258	2293	2312	TTCATATGACTCGTTATAGC
M1365	2186	2205	CGAACTTCTTGTAAGGCGCT
M1394	2157	2176	AACTTGTGCCCCATAGGAGC
M1449	2102	2121	ATCGGTAGCCAGAGAGGAGG
M1541	2010	2029	CCTTCTCTATTTATCTGACC
M1612	1939	1958	CGCCTCGTCATTACCAGAAC
M1613	1938	1957	GCCTCGTCATTACCAGAACC
M1617	1934	1953	CGTCATTACCAGAACCTAAG
M1732	1819	1838	TGATTGGTAAATTTCGAGAG
M1748	1803	1822	AGAGAAAGATCGCGAGGAAG
M1760	1791	1810	CGAGGAAGATCAATACATAA
M1761	1790	1809	GAGGAAGATCAATACATAAA
M1783	1768	1787	GTTGAACTTCTTTGTTGTCT
M1786	1765	1784	GAACTTCTTTGTTGTCTTCG
M1876	1675	1694	GGGAATCGGGTTTCCATCTT
M1962	1589	1608	TTAGTTCCATATTTAAGTAC
M2057	1494	1513	GTGTATTTGCGATTCTGCGC
M2126	1425	1444	TTAGAGCTGATCCATTCAGC
M2287	1264	1283	GCTAACGCATCTAAGGTATG
M2376	1175	1194	GGCTGAGATTTGGGCCTTAG
M2575	976	995	TCCCACACTATACCTAGTGG
M2592	959	978	TGGGTTCAAGATACCTAGAG
M2673	878	897	GTTGCACGTTGTCTGGAAGT
M2745	806	825	ACGTACGGCTCTCATAGGAA
M2785	766	785	TTCGTAAGCATCTCATATGC
M3003	548	567	GGCCTCTGCTAAAGCAACAC
M3096	455	474	TTCGATGTAAGTCAAGTTTT
M3202	349	368	GACCCACTTCGCTTGTAGGC
M3207	344	363	ACTTCGCTTGTAGGCACCTT
M3210	341	360	TCGCTTGTAGGCACCTTGAT
M3220	331	350	GCACCTTGATCTATCGATGT
M3329	222	241	TCGAACGATATTTTAAAGAG
M3366	185	204	CTCACCGTCCGCGTAAACGC
M3404	147	166	TCTCGTTCTCCCTATCAAGG
M3413	138	157	CCCTATCAAGGGTACTAAAA
M3419	132	151	CAAGGGTACTAAAAGCTCGC
M3421	130	149	AGGGTACTAAAAGCTCGCAC
M3501	50	69	CGCTAAAGACATTAAAAATG
M3523	28	47	ATTAGCTCGACAGGAAGTTG
M3615	3484	3504	GAGGTCCCTGGGCCGAAGCCC
M4337	2762	2782	TCCCCGTAGATGCCTATGGTT
M4442	2657	2677	ATTGTGGAAAATAGTTCCCAT
M4532	2567	2587	GGGAGAAAACTCCACACCAGG
M4735	2364	2384	CTTACAGGCAGCCCGATCTAT
M4746	2353	2373	CCCGATCTATTTTATTATTCT
M4785	2314	2334	CGTTCCCTACAACGAGCCTAA
M4786	2313	2333	GTTCCCTACAACGAGCCTAAA
M4903	2196	2216	TGCTTGTTCAGCGAACTTCTT
M5121	1978	1998	TCGCCTCCCGTAGCTTAGCGA
M5202	1897	1917	GCAATTCGTCCCTTAAGTAAG
M5207	1892	1912	TCGTCCCTTAAGTAAGCAATT
M5296	1803	1823	GAGAGAAAGATCGCGAGGAAG
M5363	1736	1756	AATCCTCATGTTTGAATGGCC
M5372	1727	1747	GTTTGAATGGCCGGCGTCTAT
M5715	1384	1404	TTGGGGCGACAGTCACGTCGC
M5785	1314	1334	GCTTCAAACTCCGGTTGAGGG
M5800	1299	1319	TGAGGGCTCTATCTAGAGAGC
M6186	913	933	GTTTATGTAAAACCATATCAC
M6492	607	627	GGCAGTGTACGCCTTCACGAG
M6763	336	356	TTGTAGGCACCTTGATCTATC
M6878	221	241	TCGAACGATATTTTAAAGAGA
M6954	145	165	CTCGTTCTCCCTATCAAGGGT
M7010	89	109	GGAATTCCGGCTACCTACAGC
M7063	36	56	AAAAATGGCATTAGCTCGACA
M7136	3510	3531	GAGAATCCCGGGTCCTCTCTTT
M7242	3404	3425	CCCCGTTTACGGGGGTCCCTCG
M7682	2964	2985	TTAATATCAGCATCAGGGCGAA
M7701	2945	2966	GAAGAGATTGTCAACAGGTTTC
M7723	2923	2944	TTGATGTAAAACGGTTTGACAT
M7818	2828	2849	TTTAAAACCGTAGTAGGCAAGT
M7990	2656	2677	ATTGTGGAAAATAGTTCCCATC
M8254	2392	2413	TTCTGGAGGTACATATTCATAT
M8268	2378	2399	ATTCATATCAGGCTCCTTACAG
M8295	2351	2372	CCGATCTATTTTATTATTCTTC
M8457	2189	2210	TTCAGCGAACTTCTTGTAAGGC
M8824	1822	1843	GCAATTGATTGGTAAATTTCGA
M8835	1811	1832	GTAAATTTCGAGAGAAAGATCG
M8978	1668	1689	TCGGGTTTCCATCTTTTAGGAG
M9485	1161	1182	GGCCTTAGCAGTGCCCTGTCTC
M9787	859	880	AGTTTGCAGCTGGATACGACAG
M9989	657	678	TTCGTTTAGGGCAAGGTAGCGG
M10305	341	362	CTTCGCTTGTAGGCACCTTGAT
M10431	215	236	CGATATTTTAAAGAGAATGAGT
M10471	175	196	CCGCGTAAACGCGAACGGAGGG
M10687	3505	3527	ATCCCGGGTCCTCTCTTTAGGGG
M11770	2422	2444	GAGCCGGCGTCTGATGAAAGCAC
M11888	2304	2326	ACAACGAGCCTAAATTCATATGA
M12466	1726	1748	TGTTTGAATGGCCGGCGTCTATT
M12585	1607	1629	TCGTAGCGAAAATTGGAATGGTT
M12588	1604	1626	TAGCGAAAATTGGAATGGTTAGT
M13851	341	363	ACTTCGCTTGTAGGCACCTTGAT
