# Supplementary material for: RNA-dependent RNA targeting by CRISPR-Cas9
Source: eLife journal article supplement (doi:10.7554/elife.32724), 2018-01-05
Supplement: supp [file elife-32724-supp-v1.zip › elife_poa_e32724_Figure_3_figure_supplement_3_source_data_1.xlsx]

## Sheet: FigS8B
Apo SauCas9	Non-targeting	23	22	21	20
1200000000000	1200000000000	80000000000	40000000000	40000000000	40000000000
800000000000	800000000000	40000000000	60000000000	40000000000	140000000000
800000000000	800000000000	40000000000	60000000000	40000000000	80000000000

## Sheet: FigS8D
Apo SauCas9	Non-targeting	14238	14238-scr	14210	14210-scr
1200000000000	1200000000000	80000000000	800000000000	120000000000	1400000000000
800000000000	800000000000	40000000000	1200000000000	40000000000	400000000000
800000000000	800000000000	100000000000	1000000000000	100000000000	600000000000
