# Supplementary material for: RNA-dependent RNA targeting by CRISPR-Cas9
Source: eLife journal article supplement (doi:10.7554/elife.32724), 2018-01-05
Supplement: supp [file elife-32724-supp-v1.zip › elife_poa_e32724_Figure_3_figure_supplement_4_source_data_1.xlsx]

## Sheet: logFC per sample and guide
sgRNA	Gene	Sequence	Length	Position	Mutation	LogFC-MOI10_1	LogFC-MOI10_2	LogFC-MOI10_3	LogFC-MOI100_1	LogFC-MOI100_2	LogFC-MOI100_3
M14899	SNP	AAGGTCCCTGGGCCGAAGCCCGC	23	1	G1A	-0.609305	-3.80724	1.03632	-4.50846	-1.25251	-1.91247
M14900	SNP	CAGGTCCCTGGGCCGAAGCCCGC	23	1	G1C	-5.48856	-4.09588	-2.37044	-2.60876	0.257896	2.38088
M14901	SNP	TAGGTCCCTGGGCCGAAGCCCGC	23	1	G1T	-5.69499	-0.826747	0.0491364	-2.8152	-3.48798	1.09403
M15799	SNP	ACACCGTTGGAGAACGTGCATTG	23	1	G1A	#N/A	#N/A	#N/A	#N/A	#N/A	#N/A
M15800	SNP	CCACCGTTGGAGAACGTGCATTG	23	1	G1C	#N/A	#N/A	#N/A	#N/A	#N/A	#N/A
M15801	SNP	TCACCGTTGGAGAACGTGCATTG	23	1	G1T	-6.78407	-3.19878	-0.159361	3.30989	-7.28885	-2.76229
M16000	SNP	ACATCTAAGGTATGGACCATCGA	23	1	G1A	#N/A	#N/A	#N/A	#N/A	#N/A	#N/A
M16001	SNP	CCATCTAAGGTATGGACCATCGA	23	1	G1C	#N/A	#N/A	#N/A	#N/A	#N/A	#N/A
M16002	SNP	TCATCTAAGGTATGGACCATCGA	23	1	G1T	0.44323	-1.85063	-2.8422	-0.724177	-1.64898	-5.57539
M16444	SNP	ATCGGTGATTTCACCTCCAGTAT	23	1	G1A	#N/A	#N/A	#N/A	#N/A	#N/A	#N/A
M16445	SNP	CTCGGTGATTTCACCTCCAGTAT	23	1	G1C	#N/A	#N/A	#N/A	#N/A	#N/A	#N/A
M16446	SNP	TTCGGTGATTTCACCTCCAGTAT	23	1	G1T	#N/A	#N/A	#N/A	#N/A	#N/A	#N/A
M16573	SNP	ATTACCTACAGGTAGGAGCCAGT	23	1	G1A	-1.99306	-7.0036	-0.71071	-2.13704	-2.15168	-2.05461
M16574	SNP	CTTACCTACAGGTAGGAGCCAGT	23	1	G1C	#N/A	#N/A	#N/A	#N/A	#N/A	#N/A
M16575	SNP	TTTACCTACAGGTAGGAGCCAGT	23	1	G1T	#N/A	#N/A	#N/A	#N/A	#N/A	#N/A
M16897	SNP	ATCAAATGTGAACCCATTTCCCA	23	1	C1A	-3.12497	0.201312	2.07472	-0.952585	4.1472	-2.80742
M16898	SNP	GTCAAATGTGAACCCATTTCCCA	23	1	C1G	-0.0493631	2.7075	-1.77615	2.01453	-3.76318	-1.49199
M16899	SNP	TTCAAATGTGAACCCATTTCCCA	23	1	C1T	1.50632	1.25993	-0.62379	-0.502255	-1.13275	-2.07251
M16966	SNP	AGAACGTTTTACGAAGATTCGGT	23	1	C1A	-7.69845	-3.28923	-4.9884	-4.64892	-7.93575	-4.63645
M16967	SNP	GGAACGTTTTACGAAGATTCGGT	23	1	C1G	#N/A	#N/A	#N/A	#N/A	#N/A	#N/A
M16968	SNP	TGAACGTTTTACGAAGATTCGGT	23	1	C1T	-6.56386	-5.9407	-2.82854	-6.56386	-5.9407	-3.3638
M17476	SNP	ATATGGTTCCGGCGTTACCAAAA	23	1	C1A	-1.98937	-0.461675	0.551161	-1.31872	0.509022	2.99647
M17477	SNP	GTATGGTTCCGGCGTTACCAAAA	23	1	C1G	2.52886	-0.930555	1.84632	-0.0290599	-1.25387	-4.78679
M17478	SNP	TTATGGTTCCGGCGTTACCAAAA	23	1	C1T	-0.699835	-2.00415	3.26411	-0.641547	3.29268	1.8011
M17545	SNP	AGAGGGGACGAAGGTCTCGTTCT	23	1	G1A	#N/A	#N/A	#N/A	#N/A	#N/A	#N/A
M17546	SNP	CGAGGGGACGAAGGTCTCGTTCT	23	1	G1C	3.11712	-2.56272	-3.26863	-4.19879	0.689143	-3.83162
M17547	SNP	TGAGGGGACGAAGGTCTCGTTCT	23	1	G1T	2.25234	-3.0678	-4.0699	-3.73411	-2.86047	0.624309
M17734	SNP	AACTCACCCGTTATTACGTCAGT	23	1	G1A	#N/A	#N/A	#N/A	#N/A	#N/A	#N/A
M17735	SNP	CACTCACCCGTTATTACGTCAGT	23	1	G1C	-1.65386	2.80581	-3.30162	-2.05555	2.31202	-2.15318
M17736	SNP	TACTCACCCGTTATTACGTCAGT	23	1	G1T	#N/A	#N/A	#N/A	#N/A	#N/A	#N/A
M14902	SNP	GCGGTCCCTGGGCCGAAGCCCGC	23	2	A2C	0.905161	1.72446	-3.93397	-3.12224	0.739107	-0.925927
M14903	SNP	GGGGTCCCTGGGCCGAAGCCCGC	23	2	A2G	1.96371	1.48142	1.9893	1.09154	2.03267	-1.26474
M14904	SNP	GTGGTCCCTGGGCCGAAGCCCGC	23	2	A2T	1.33828	4.45963	-0.870217	1.45149	-2.07302	2.29012
M15802	SNP	GAACCGTTGGAGAACGTGCATTG	23	2	C2A	-1.39993	-1.02351	3.58598	-5.91129	-3.68475	-5.641
M15803	SNP	GGACCGTTGGAGAACGTGCATTG	23	2	C2G	-6.67817	-4.49896	2.50516	-6.67817	-3.37963	-6.59543
M15804	SNP	GTACCGTTGGAGAACGTGCATTG	23	2	C2T	#N/A	#N/A	#N/A	#N/A	#N/A	#N/A
M16003	SNP	GAATCTAAGGTATGGACCATCGA	23	2	C2A	-1.62894	-4.98068	-1.79489	-1.72625	-4.05843	2.42432
M16004	SNP	GGATCTAAGGTATGGACCATCGA	23	2	C2G	0.712736	1.09285	-6.55809	2.21488	-0.751157	-4.02705
M16005	SNP	GTATCTAAGGTATGGACCATCGA	23	2	C2T	-5.00843	-4.81393	-5.9663	2.8542	3.46149	-4.06572
M16447	SNP	GACGGTGATTTCACCTCCAGTAT	23	2	T2A	#N/A	#N/A	#N/A	#N/A	#N/A	#N/A
M16448	SNP	GCCGGTGATTTCACCTCCAGTAT	23	2	T2C	3.25712	-2.51472	3.40926	2.40518	-2.30442	-5.65682
M16449	SNP	GGCGGTGATTTCACCTCCAGTAT	23	2	T2G	#N/A	#N/A	#N/A	#N/A	#N/A	#N/A
M16576	SNP	GATACCTACAGGTAGGAGCCAGT	23	2	T2A	-4.31979	-1.96944	-1.50006	1.67905	0.559888	-4.51168
M16577	SNP	GCTACCTACAGGTAGGAGCCAGT	23	2	T2C	2.37521	-2.61842	-0.0578545	-3.59655	-3.34493	-2.25829
M16578	SNP	GGTACCTACAGGTAGGAGCCAGT	23	2	T2G	#N/A	#N/A	#N/A	#N/A	#N/A	#N/A
M16900	SNP	CACAAATGTGAACCCATTTCCCA	23	2	T2A	2.48584	0.389698	1.38222	0.0153428	0.961424	0.0993428
M16901	SNP	CCCAAATGTGAACCCATTTCCCA	23	2	T2C	-0.0794233	1.5331	-0.533102	1.58383	-3.44024	0.769882
M16902	SNP	CGCAAATGTGAACCCATTTCCCA	23	2	T2G	-3.30382	-0.918031	0.134403	0.162975	-1.61374	-3.87433
M16969	SNP	CAAACGTTTTACGAAGATTCGGT	23	2	G2A	0.921633	-1.21546	3.64725	2.55242	0.452687	2.22896
M16970	SNP	CCAACGTTTTACGAAGATTCGGT	23	2	G2C	-2.27172	-5.34211	1.53379	-1.89599	-5.15093	-5.33179
M16971	SNP	CTAACGTTTTACGAAGATTCGGT	23	2	G2T	-3.74739	-2.11562	-2.27545	-5.66567	-1.06049	-3.84392
M17479	SNP	CAATGGTTCCGGCGTTACCAAAA	23	2	T2A	3.2855	-1.34259	-2.55823	-5.35328	-0.438665	-5.06704
M17480	SNP	CCATGGTTCCGGCGTTACCAAAA	23	2	T2C	-0.429091	-3.53349	1.55632	-1.98292	-2.84156	3.11378
M17481	SNP	CGATGGTTCCGGCGTTACCAAAA	23	2	T2G	1.85177	-4.00258	0.265109	2.60786	-4.52101	-4.67981
M17548	SNP	GAAGGGGACGAAGGTCTCGTTCT	23	2	G2A	#N/A	#N/A	#N/A	#N/A	#N/A	#N/A
M17549	SNP	GCAGGGGACGAAGGTCTCGTTCT	23	2	G2C	#N/A	#N/A	#N/A	#N/A	#N/A	#N/A
M17550	SNP	GTAGGGGACGAAGGTCTCGTTCT	23	2	G2T	2.02552	-3.12207	0.737292	-3.42171	-2.91002	-0.427815
M17737	SNP	GCCTCACCCGTTATTACGTCAGT	23	2	A2C	0.369607	-4.81498	-2.17514	-2.94533	-2.22795	2.4493
M17738	SNP	GGCTCACCCGTTATTACGTCAGT	23	2	A2G	0.832732	-1.76519	2.55104	1.98199	-1.99081	-1.77779
M17739	SNP	GTCTCACCCGTTATTACGTCAGT	23	2	A2T	2.442	-2.89208	4.45488	1.15061	-3.66953	-4.46815
M14905	SNP	GAAGTCCCTGGGCCGAAGCCCGC	23	3	G3A	0.462098	3.02414	0.846405	0.218049	0.114593	-3.41786
M14906	SNP	GACGTCCCTGGGCCGAAGCCCGC	23	3	G3C	-0.997363	-0.122572	1.61939	2.58517	0.323944	0.589434
M14907	SNP	GATGTCCCTGGGCCGAAGCCCGC	23	3	G3T	2.25241	-2.49541	0.810581	-2.77743	1.15047	-1.02825
M15805	SNP	GCCCCGTTGGAGAACGTGCATTG	23	3	A3C	-3.80122	-3.46871	-2.95858	-6.26485	1.61814	-4.34007
M15806	SNP	GCGCCGTTGGAGAACGTGCATTG	23	3	A3G	0.519088	-5.01522	-1.34033	0.102519	-0.486745	-6.77953
M15807	SNP	GCTCCGTTGGAGAACGTGCATTG	23	3	A3T	-1.37813	-2.38271	-5.30589	-4.46259	1.86837	0.247255
M16006	SNP	GCCTCTAAGGTATGGACCATCGA	23	3	A3C	-2.37309	-0.133763	0.0567784	-0.0896399	1.01919	3.49101
M16007	SNP	GCGTCTAAGGTATGGACCATCGA	23	3	A3G	3.14509	-9.32623	-5.5239	-5.96123	2.26972	-5.14676
M16008	SNP	GCTTCTAAGGTATGGACCATCGA	23	3	A3T	0.638615	2.29597	4.3633	2.20742	-1.78058	-2.38076
M14968	SNP	ATCATAGGAAGAAACTCTTGAA	22	1	C1A	-3.79723	3.47109	-3.21559	-1.81144	-2.30586	1.81082
M14969	SNP	GTCATAGGAAGAAACTCTTGAA	22	1	C1G	0.0130052	0.447364	-2.74017	1.21851	-1.77163	-0.167488
M14970	SNP	TTCATAGGAAGAAACTCTTGAA	22	1	C1T	2.9308	-5.15086	-5.64434	-4.71982	-5.15086	2.99147
M15034	SNP	CGCAAGACGGAAACCCGAGGTA	22	1	A1C	0.619342	1.86321	-2.46255	-0.156269	1.6533	-0.514579
M15035	SNP	GGCAAGACGGAAACCCGAGGTA	22	1	A1G	-0.756595	0.109184	1.67655	-0.574797	-0.816922	-0.592368
M15036	SNP	TGCAAGACGGAAACCCGAGGTA	22	1	A1T	2.73852	-0.724598	0.36839	-1.65939	2.01684	3.16792
M15223	SNP	CCGGATGCTGGTTTGTAAAACA	22	1	A1C	-2.88466	1.00208	-0.00859225	-3.8928	-4.84901	-1.53055
M15224	SNP	GCGGATGCTGGTTTGTAAAACA	22	1	A1G	-1.50396	-1.70609	1.47367	-3.42224	-1.1777	-3.10425
M15225	SNP	TCGGATGCTGGTTTGTAAAACA	22	1	A1T	-1.8219	1.21189	-0.862636	-1.63661	4.51467	2.64236
M15538	SNP	CTCTAACTTGATGTTAGTACCG	22	1	A1C	-4.08696	-1.77582	0.209825	-2.94672	-3.45934	-0.615024
M15539	SNP	GTCTAACTTGATGTTAGTACCG	22	1	A1G	#N/A	#N/A	#N/A	#N/A	#N/A	#N/A
M15540	SNP	TTCTAACTTGATGTTAGTACCG	22	1	A1T	3.3359	1.17718	0.953571	-2.0019	0.71992	1.24882
M15604	SNP	CCGTACGGCTCTCATAGGAAGA	22	1	A1C	1.1643	-2.97827	-8.28281	2.13221	2.89609	-3.01858
M15605	SNP	GCGTACGGCTCTCATAGGAAGA	22	1	A1G	-4.48369	3.19814	-3.52118	-3.08545	-4.13353	-3.34162
M15606	SNP	TCGTACGGCTCTCATAGGAAGA	22	1	A1T	-3.95471	-4.8402	-2.98551	-4.83734	-3.44124	-1.85004
M15670	SNP	AGCTGTAGCAGGAGCGTGCGTC	22	1	G1A	#N/A	#N/A	#N/A	#N/A	#N/A	#N/A
M15671	SNP	CGCTGTAGCAGGAGCGTGCGTC	22	1	G1C	#N/A	#N/A	#N/A	#N/A	#N/A	#N/A
M15672	SNP	TGCTGTAGCAGGAGCGTGCGTC	22	1	G1T	-7.68042	-3.61266	-7.52198	-7.45031	-6.72757	-6.19073
M15868	SNP	AGCGATTGCTGAGGGAATCGGG	22	1	T1A	#N/A	#N/A	#N/A	#N/A	#N/A	#N/A
M15869	SNP	CGCGATTGCTGAGGGAATCGGG	22	1	T1C	-4.12634	-4.99634	-5.12355	-5.38982	-0.493462	-3.75592
M15870	SNP	GGCGATTGCTGAGGGAATCGGG	22	1	T1G	0.337677	-4.35478	-3.25536	-1.95302	0.360641	2.44188
M15934	SNP	CTGAAAGCACCGACCCCTTTCT	22	1	A1C	1.54072	-1.12773	-1.11305	-1.79736	-0.230369	-0.381367
M15935	SNP	GTGAAAGCACCGACCCCTTTCT	22	1	A1G	0.200628	-0.982482	-2.29223	-0.548061	-0.627667	-0.784316
M15936	SNP	TTGAAAGCACCGACCCCTTTCT	22	1	A1T	1.43426	1.64185	-0.823022	2.15385	1.05593	2.06943
M16318	SNP	CGCGAGGTCCGTCCCACCGAAG	22	1	A1C	-4.09902	-4.41422	-8.37698	-4.40062	-5.69718	1.69855
M16319	SNP	GGCGAGGTCCGTCCCACCGAAG	22	1	A1G	-0.846881	-0.708662	-1.62951	-0.749359	-1.05591	-1.98463
M16320	SNP	TGCGAGGTCCGTCCCACCGAAG	22	1	A1T	-1.05164	0.0927085	-3.87768	-2.99469	-0.731452	2.07562
M16642	SNP	ACGGATCACCGCTTCCAGTAGC	22	1	G1A	-3.52065	-3.36768	-2.6009	-0.0610533	-1.63103	-2.92521
M16643	SNP	CCGGATCACCGCTTCCAGTAGC	22	1	G1C	1.35994	2.39814	-7.95662	-2.19423	-4.19671	-7.95662
M16644	SNP	TCGGATCACCGCTTCCAGTAGC	22	1	G1T	1.89001	2.20003	2.18967	-0.647545	-3.96911	-10.0884
M16771	SNP	CAGCCTGTGAACGCGAGTTAGA	22	1	A1C	1.48921	2.94472	-2.5074	1.58524	-2.19887	-3.31444
M16772	SNP	GAGCCTGTGAACGCGAGTTAGA	22	1	A1G	#N/A	#N/A	#N/A	#N/A	#N/A	#N/A
M16773	SNP	TAGCCTGTGAACGCGAGTTAGA	22	1	A1T	-6.52046	-0.271477	1.24195	-0.239371	-3.69947	-4.93809
M17095	SNP	ATGGGAGAAAACTCCACACCAG	22	1	G1A	-4.63827	-4.09641	4.05562	-4.39203	-2.01439	-4.92182
M17096	SNP	CTGGGAGAAAACTCCACACCAG	22	1	G1C	#N/A	#N/A	#N/A	#N/A	#N/A	#N/A
M17097	SNP	TTGGGAGAAAACTCCACACCAG	22	1	G1T	-5.28167	0.797131	-4.53536	-2.42079	-3.91845	3.73041
M17224	SNP	CACAGTCTGGGTTGCCACTTTA	22	1	A1C	-3.52902	-2.67676	-7.53447	1.45097	2.30994	-7.53447
M17225	SNP	GACAGTCTGGGTTGCCACTTTA	22	1	A1G	#N/A	#N/A	#N/A	#N/A	#N/A	#N/A
M17226	SNP	TACAGTCTGGGTTGCCACTTTA	22	1	A1T	-3.45159	-1.15469	1.87594	-2.93095	-2.88869	-2.49923
M17410	SNP	ATAACGGTTGCTTGTTCAGCGA	22	1	G1A	-0.986178	-9.41099	-1.10286	-3.88944	0.689075	-2.17135
M17411	SNP	CTAACGGTTGCTTGTTCAGCGA	22	1	G1C	-3.88097	-4.87874	2.03951	0.0597431	-1.84267	0.814462
M17412	SNP	TTAACGGTTGCTTGTTCAGCGA	22	1	G1T	#N/A	#N/A	#N/A	#N/A	#N/A	#N/A
M14971	SNP	CACATAGGAAGAAACTCTTGAA	22	2	T2A	2.98689	3.61987	-3.89666	-2.48389	-0.792268	-1.36562
M14972	SNP	CCCATAGGAAGAAACTCTTGAA	22	2	T2C	-4.28361	-5.54063	2.88458	-3.06342	-4.4213	-3.70943
M14973	SNP	CGCATAGGAAGAAACTCTTGAA	22	2	T2G	0.703416	2.91101	-3.71308	-2.96653	1.91313	-0.542079
M15037	SNP	AACAAGACGGAAACCCGAGGTA	22	2	G2A	-1.54844	4.45101	-0.708656	0.555732	-4.81075	-0.386131
M15038	SNP	ACCAAGACGGAAACCCGAGGTA	22	2	G2C	#N/A	#N/A	#N/A	#N/A	#N/A	#N/A
M15039	SNP	ATCAAGACGGAAACCCGAGGTA	22	2	G2T	2.33219	-1.41647	-4.5275	0.0612426	2.50418	2.36899
M15226	SNP	AAGGATGCTGGTTTGTAAAACA	22	2	C2A	1.10316	-2.4286	1.68294	1.05314	-2.2177	-4.53304
M15227	SNP	AGGGATGCTGGTTTGTAAAACA	22	2	C2G	4.81959	-2.58815	3.05866	-2.37102	-3.09649	-2.93555
M15228	SNP	ATGGATGCTGGTTTGTAAAACA	22	2	C2T	-0.900189	-4.01375	-1.77296	-2.62224	2.27139	0.744027
M15541	SNP	AACTAACTTGATGTTAGTACCG	22	2	T2A	#N/A	#N/A	#N/A	#N/A	#N/A	#N/A
M15542	SNP	ACCTAACTTGATGTTAGTACCG	22	2	T2C	1.5844	-1.54287	4.19137	3.28372	-2.05121	-2.00811
M15543	SNP	AGCTAACTTGATGTTAGTACCG	22	2	T2G	#N/A	#N/A	#N/A	#N/A	#N/A	#N/A
M15607	SNP	AAGTACGGCTCTCATAGGAAGA	22	2	C2A	#N/A	#N/A	#N/A	#N/A	#N/A	#N/A
M15608	SNP	AGGTACGGCTCTCATAGGAAGA	22	2	C2G	1.67694	-4.01371	-0.266984	-6.55614	-6.48576	-3.36741
M15609	SNP	ATGTACGGCTCTCATAGGAAGA	22	2	C2T	0.952679	1.8113	-1.82038	-4.57421	3.26743	0.651994
M15673	SNP	GACTGTAGCAGGAGCGTGCGTC	22	2	G2A	#N/A	#N/A	#N/A	#N/A	#N/A	#N/A
M15674	SNP	GCCTGTAGCAGGAGCGTGCGTC	22	2	G2C	-5.9901	-3.11395	-0.215225	-2.96922	3.05187	-0.4984
M15675	SNP	GTCTGTAGCAGGAGCGTGCGTC	22	2	G2T	-2.88664	-3.90164	-0.152154	-2.62513	-1.51364	4.75637
M15871	SNP	TACGATTGCTGAGGGAATCGGG	22	2	G2A	#N/A	#N/A	#N/A	#N/A	#N/A	#N/A
M15872	SNP	TCCGATTGCTGAGGGAATCGGG	22	2	G2C	#N/A	#N/A	#N/A	#N/A	#N/A	#N/A
M15873	SNP	TTCGATTGCTGAGGGAATCGGG	22	2	G2T	#N/A	#N/A	#N/A	#N/A	#N/A	#N/A
M15937	SNP	AAGAAAGCACCGACCCCTTTCT	22	2	T2A	-3.48445	2.73525	-0.839968	-1.07902	-3.15425	3.79602
M15938	SNP	ACGAAAGCACCGACCCCTTTCT	22	2	T2C	3.11691	-1.41586	1.31135	-2.17248	1.86599	1.7457
M15939	SNP	AGGAAAGCACCGACCCCTTTCT	22	2	T2G	-3.37921	-2.40512	-0.132365	-0.426692	-5.68095	-1.64074
M16321	SNP	AACGAGGTCCGTCCCACCGAAG	22	2	G2A	1.46237	-4.79708	1.45131	-2.30828	-3.28119	0.601397
M16322	SNP	ACCGAGGTCCGTCCCACCGAAG	22	2	G2C	-0.958598	2.70751	-1.55248	0.502863	1.37522	-0.49164
M16323	SNP	ATCGAGGTCCGTCCCACCGAAG	22	2	G2T	-1.7712	-1.26358	-5.07453	-0.786709	2.53938	-1.38845
M16645	SNP	GAGGATCACCGCTTCCAGTAGC	22	2	C2A	-3.74037	-3.85085	3.65581	-3.69893	-2.45189	-3.49454
M16646	SNP	GGGGATCACCGCTTCCAGTAGC	22	2	C2G	-2.95492	2.93051	1.19224	1.3436	0.25261	0.91811
M16647	SNP	GTGGATCACCGCTTCCAGTAGC	22	2	C2T	2.3481	0.355579	-0.299083	-2.27395	0.00525575	1.13806
M16774	SNP	ACGCCTGTGAACGCGAGTTAGA	22	2	A2C	#N/A	#N/A	#N/A	#N/A	#N/A	#N/A
M16775	SNP	AGGCCTGTGAACGCGAGTTAGA	22	2	A2G	1.55481	-0.441389	1.83898	0.115713	-1.32659	0.0786303
M16776	SNP	ATGCCTGTGAACGCGAGTTAGA	22	2	A2T	2.35872	0.663064	-1.94039	2.10589	0.90001	1.25243
M17098	SNP	GAGGGAGAAAACTCCACACCAG	22	2	T2A	3.32133	-3.62769	2.47624	-2.41891	4.13939	1.09964
M17099	SNP	GCGGGAGAAAACTCCACACCAG	22	2	T2C	#N/A	#N/A	#N/A	#N/A	#N/A	#N/A
M17100	SNP	GGGGGAGAAAACTCCACACCAG	22	2	T2G	#N/A	#N/A	#N/A	#N/A	#N/A	#N/A
M17227	SNP	ACCAGTCTGGGTTGCCACTTTA	22	2	A2C	#N/A	#N/A	#N/A	#N/A	#N/A	#N/A
M17228	SNP	AGCAGTCTGGGTTGCCACTTTA	22	2	A2G	-1.21129	-0.358838	-2.1964	-0.292845	0.138193	-0.341262
M17229	SNP	ATCAGTCTGGGTTGCCACTTTA	22	2	A2T	-0.710047	-1.03188	2.12473	3.3128	-1.08689	-0.318253
M17413	SNP	GAAACGGTTGCTTGTTCAGCGA	22	2	T2A	-0.581441	-4.88105	-2.7461	-6.41226	0.628788	1.45216
M17414	SNP	GCAACGGTTGCTTGTTCAGCGA	22	2	T2C	-3.87235	-4.02153	0.191027	1.19041	-3.81223	1.06573
M17415	SNP	GGAACGGTTGCTTGTTCAGCGA	22	2	T2G	-4.52617	-4.53243	-5.13577	1.30587	-4.5811	-5.69877
M14974	SNP	CTAATAGGAAGAAACTCTTGAA	22	3	C3A	-5.37789	-3.55013	-3.3175	-3.68393	-3.3428	3.28543
M14975	SNP	CTGATAGGAAGAAACTCTTGAA	22	3	C3G	1.30831	3.70164	0.220579	2.34768	-2.2782	1.85136
M14976	SNP	CTTATAGGAAGAAACTCTTGAA	22	3	C3T	1.03116	1.72708	1.33783	-0.67993	2.60289	-4.7031
M15040	SNP	AGAAAGACGGAAACCCGAGGTA	22	3	C3A	-0.190858	-0.217514	-0.974265	0.412768	-3.4565	0.435947
M15041	SNP	AGGAAGACGGAAACCCGAGGTA	22	3	C3G	-4.09331	2.61997	-0.03821	-1.83476	0.765216	0.678584
M15042	SNP	AGTAAGACGGAAACCCGAGGTA	22	3	C3T	-3.35765	-3.59192	2.6486	-4.65833	-3.88903	-3.59141
M15229	SNP	ACAGATGCTGGTTTGTAAAACA	22	3	G3A	3.84905	-0.528849	1.35844	-1.42805	-0.062385	-1.54995
M15230	SNP	ACCGATGCTGGTTTGTAAAACA	22	3	G3C	-1.71035	-1.07242	-0.586556	2.7576	-3.73396	-3.18948
M15231	SNP	ACTGATGCTGGTTTGTAAAACA	22	3	G3T	-0.454904	-1.29419	-2.38008	-1.93525	-5.9407	-1.04883
M15544	SNP	ATATAACTTGATGTTAGTACCG	22	3	C3A	-3.787	0.947546	-1.22248	0.570692	0.14835	-5.55076
M15545	SNP	ATGTAACTTGATGTTAGTACCG	22	3	C3G	3.52975	-4.00781	2.036	-4.80165	4.68684	-4.60408
M15546	SNP	ATTTAACTTGATGTTAGTACCG	22	3	C3T	0.494201	1.07257	1.07126	1.08627	-2.89264	0.824371
M15610	SNP	ACATACGGCTCTCATAGGAAGA	22	3	G3A	-2.40111	-1.80642	2.66298	1.52296	3.53996	3.14537
M15611	SNP	ACCTACGGCTCTCATAGGAAGA	22	3	G3C	1.79911	-4.74386	-0.505518	2.4098	-4.54221	1.3304
M15612	SNP	ACTTACGGCTCTCATAGGAAGA	22	3	G3T	-2.10118	2.16484	1.52192	-3.58153	4.57579	2.31661
M15676	SNP	GGATGTAGCAGGAGCGTGCGTC	22	3	C3A	-1.05805	-1.40453	-2.71078	-0.102335	-1.05185	-3.2522
M15677	SNP	GGGTGTAGCAGGAGCGTGCGTC	22	3	C3G	-0.578358	-1.58083	-0.84564	-1.31737	-1.64616	0.36572
M15678	SNP	GGTTGTAGCAGGAGCGTGCGTC	22	3	C3T	-2.0156	-8.16997	-3.67837	-4.57765	1.04857	-3.28724
M15874	SNP	TGAGATTGCTGAGGGAATCGGG	22	3	C3A	-4.1501	-2.1314	-4.62821	2.4258	-0.740629	2.45401
M15875	SNP	TGGGATTGCTGAGGGAATCGGG	22	3	C3G	-2.32891	-0.0710477	-0.576854	0.377942	0.101734	1.52785
M15876	SNP	TGTGATTGCTGAGGGAATCGGG	22	3	C3T	-0.230199	-0.918983	-3.04638	-3.70026	-3.10444	2.48704
M15940	SNP	ATAAAAGCACCGACCCCTTTCT	22	3	G3A	1.24174	2.74196	-0.481623	4.14467	4.6402	-0.782613
M15941	SNP	ATCAAAGCACCGACCCCTTTCT	22	3	G3C	1.19958	1.42388	-3.5336	-0.456198	1.14654	-0.345526
M15942	SNP	ATTAAAGCACCGACCCCTTTCT	22	3	G3T	-1.53585	-2.81813	-0.268982	-1.28372	-0.736107	-3.40184
M16324	SNP	AGAGAGGTCCGTCCCACCGAAG	22	3	C3A	1.11063	-3.56503	-1.72911	1.63751	-1.49542	0.800489
M16325	SNP	AGGGAGGTCCGTCCCACCGAAG	22	3	C3G	-5.20817	-0.538254	1.45668	-3.98798	-5.31188	-2.05098
M16326	SNP	AGTGAGGTCCGTCCCACCGAAG	22	3	C3T	0.23751	1.64553	1.17966	0.670955	1.91661	1.57317
M16648	SNP	GCAGATCACCGCTTCCAGTAGC	22	3	G3A	2.24298	1.54683	-0.190124	0.524282	1.59184	-2.95374
M16649	SNP	GCCGATCACCGCTTCCAGTAGC	22	3	G3C	-2.26585	-3.40095	-3.84425	-3.08494	0.576457	-0.137978
M16650	SNP	GCTGATCACCGCTTCCAGTAGC	22	3	G3T	0.839954	-1.35178	0.0244557	-4.51586	-3.15492	0.527115
M16777	SNP	AAACCTGTGAACGCGAGTTAGA	22	3	G3A	2.89625	0.745532	-6.3253	3.1694	-0.770178	0.205678
M16778	SNP	AACCCTGTGAACGCGAGTTAGA	22	3	G3C	-1.59462	-1.43011	-3.24276	-0.989011	-1.10282	-3.31998
M16779	SNP	AATCCTGTGAACGCGAGTTAGA	22	3	G3T	-0.49972	-2.82048	0.992801	-3.10102	-2.92633	-3.05066
M17101	SNP	GTAGGAGAAAACTCCACACCAG	22	3	G3A	#N/A	#N/A	#N/A	#N/A	#N/A	#N/A
M17102	SNP	GTCGGAGAAAACTCCACACCAG	22	3	G3C	-3.4484	-6.25792	-6.69629	-1.75443	-2.89436	-6.69629
M17103	SNP	GTTGGAGAAAACTCCACACCAG	22	3	G3T	#N/A	#N/A	#N/A	#N/A	#N/A	#N/A
M17230	SNP	AAAAGTCTGGGTTGCCACTTTA	22	3	C3A	#N/A	#N/A	#N/A	#N/A	#N/A	#N/A
M17231	SNP	AAGAGTCTGGGTTGCCACTTTA	22	3	C3G	-1.37016	-1.40033	-0.592155	-1.36844	-4.22933	-2.14422
M17232	SNP	AATAGTCTGGGTTGCCACTTTA	22	3	C3T	-2.87498	-2.12309	-2.4908	-3.18559	-2.89377	1.35408
M17416	SNP	GTCACGGTTGCTTGTTCAGCGA	22	3	A3C	1.34119	0.990591	-2.44682	-3.05106	2.49767	3.37715
M17417	SNP	GTGACGGTTGCTTGTTCAGCGA	22	3	A3G	0.00225046	-0.500198	-1.68726	-0.511568	-5.44609	-3.17346
M17418	SNP	GTTACGGTTGCTTGTTCAGCGA	22	3	A3T	-0.221493	-0.716071	-7.3334	-3.37951	-3.72048	-5.11493
M14977	SNP	CTCCTAGGAAGAAACTCTTGAA	22	4	A4C	#N/A	#N/A	#N/A	#N/A	#N/A	#N/A
M14978	SNP	CTCGTAGGAAGAAACTCTTGAA	22	4	A4G	-2.47978	-3.4866	-4.83541	-2.93421	-4.21311	-5.37068
M14979	SNP	CTCTTAGGAAGAAACTCTTGAA	22	4	A4T	-4.51069	-7.34737	-4.85477	5.1413	-3.98381	-7.58795
M15043	SNP	AGCCAGACGGAAACCCGAGGTA	22	4	A4C	-1.69064	2.3097	-2.75158	0.99176	2.21456	-4.54017
M15044	SNP	AGCGAGACGGAAACCCGAGGTA	22	4	A4G	-0.359565	1.82516	0.916842	-2.48992	2.4375	-1.8913
M15045	SNP	AGCTAGACGGAAACCCGAGGTA	22	4	A4T	-0.226795	-4.69386	0.924877	-4.82087	2.02692	3.4124
M15100	SNP	ATAGAGCTGATCCATTCAGCG	21	1	T1A	#N/A	#N/A	#N/A	#N/A	#N/A	#N/A
M15101	SNP	CTAGAGCTGATCCATTCAGCG	21	1	T1C	2.54954	-2.9638	-1.87664	-2.74448	4.29492	0.791364
M15102	SNP	GTAGAGCTGATCCATTCAGCG	21	1	T1G	#N/A	#N/A	#N/A	#N/A	#N/A	#N/A
M15289	SNP	ACTAACGCATCTAAGGTATGG	21	1	G1A	3.8548	0.697775	3.16306	1.13006	1.27525	-1.32786
M15290	SNP	CCTAACGCATCTAAGGTATGG	21	1	G1C	5.26775	-2.2448	-0.397784	-3.61574	4.92982	0.725792
M15291	SNP	TCTAACGCATCTAAGGTATGG	21	1	G1T	1.1023	-3.00561	-0.524825	0.94683	2.64339	0.650734
M15352	SNP	CCGGTTGCTTGTTCAGCGAAC	21	1	A1C	#N/A	#N/A	#N/A	#N/A	#N/A	#N/A
M15353	SNP	GCGGTTGCTTGTTCAGCGAAC	21	1	A1G	-0.579477	1.85323	-3.10941	1.76587	-1.36054	-0.879593
M15354	SNP	TCGGTTGCTTGTTCAGCGAAC	21	1	A1T	#N/A	#N/A	#N/A	#N/A	#N/A	#N/A
M15475	SNP	AGTCGCGAGTTGTGAGGCTGT	21	1	C1A	0.255841	1.75311	-0.0232621	0.000272832	1.22565	1.59516
M15476	SNP	GGTCGCGAGTTGTGAGGCTGT	21	1	C1G	-0.0176543	0.0484285	1.09104	-1.14581	-0.528358	1.0934
M15477	SNP	TGTCGCGAGTTGTGAGGCTGT	21	1	C1T	0.314025	-0.111241	-0.910531	-0.600504	-0.987771	0.205896
M15736	SNP	ATCGCGAAAGAGCCCGGACAC	21	1	C1A	0.118492	-0.473074	-1.64695	0.00814342	-3.10242	-2.1186
M15737	SNP	GTCGCGAAAGAGCCCGGACAC	21	1	C1G	-4.94316	2.86097	-5.96079	-3.5052	-2.6717	0.898653
M15738	SNP	TTCGCGAAAGAGCCCGGACAC	21	1	C1T	2.18595	-1.37922	-0.813606	-0.51762	0.406134	-0.951811
M16129	SNP	AAGGGAGAAGCCGAAACCGGC	21	1	G1A	-4.7002	-3.77618	2.41288	-1.00514	-3.33118	0.339371
M16130	SNP	CAGGGAGAAGCCGAAACCGGC	21	1	G1C	-5.71789	-4.35466	-4.72674	-8.53731	-4.15301	-2.90785
M16131	SNP	TAGGGAGAAGCCGAAACCGGC	21	1	G1T	1.17222	2.81028	-0.165623	-1.4335	4.18433	0.0507772
M16192	SNP	ACACGGTAAAAGTGCGCGCCG	21	1	C1A	-0.0368714	1.38009	0.853664	1.26807	0.103405	1.03784
M16193	SNP	GCACGGTAAAAGTGCGCGCCG	21	1	C1G	-1.68114	0.351397	0.383986	0.259655	-3.3918	-1.48349
M16194	SNP	TCACGGTAAAAGTGCGCGCCG	21	1	C1T	0.0695117	0.342024	-2.32552	0.909405	-2.18523	-1.5853
M16255	SNP	ACGGCGTTAGCCACTCCGAAG	21	1	C1A	-0.652874	0.920553	2.56341	0.559717	0.961587	-0.571255
M16256	SNP	GCGGCGTTAGCCACTCCGAAG	21	1	C1G	#N/A	#N/A	#N/A	#N/A	#N/A	#N/A
M16257	SNP	TCGGCGTTAGCCACTCCGAAG	21	1	C1T	-8.09813	-2.5934	-1.21473	-3.58474	-4.27691	-4.36928
M16708	SNP	CCCAACGGATTTGAGCCGGCG	21	1	A1C	-4.24464	-7.34737	-7.62254	-3.04553	-3.05565	-3.07047
M16709	SNP	GCCAACGGATTTGAGCCGGCG	21	1	A1G	1.04601	-0.31552	-0.733097	-0.0190272	-0.298073	2.00708
M16710	SNP	TCCAACGGATTTGAGCCGGCG	21	1	A1T	-1.26377	1.48969	1.17501	1.20043	-2.232	-2.70355
M17161	SNP	ACTTCCAGTAGCGACAGAAGC	21	1	G1A	-3.36547	1.73051	-0.323776	-3.38982	-2.74523	-1.5891
M17162	SNP	CCTTCCAGTAGCGACAGAAGC	21	1	G1C	#N/A	#N/A	#N/A	#N/A	#N/A	#N/A
M17163	SNP	TCTTCCAGTAGCGACAGAAGC	21	1	G1T	#N/A	#N/A	#N/A	#N/A	#N/A	#N/A
M17803	SNP	AAGGCTCCTTACAGGCAGCCC	21	1	C1A	#N/A	#N/A	#N/A	#N/A	#N/A	#N/A
M17804	SNP	GAGGCTCCTTACAGGCAGCCC	21	1	C1G	#N/A	#N/A	#N/A	#N/A	#N/A	#N/A
M17805	SNP	TAGGCTCCTTACAGGCAGCCC	21	1	C1T	#N/A	#N/A	#N/A	#N/A	#N/A	#N/A
M17866	SNP	ATGAGCAGGACCCCGAAAGGG	21	1	T1A	0.460009	0.680043	3.04458	2.23834	1.24586	2.41434
M17867	SNP	CTGAGCAGGACCCCGAAAGGG	21	1	T1C	-1.35896	-0.0328137	0.510347	1.15206	-3.11428	1.95602
M17868	SNP	GTGAGCAGGACCCCGAAAGGG	21	1	T1G	2.17352	-0.135838	-0.774264	1.01411	0.972966	-3.03102
M17989	SNP	AAAGAGATTGTCAACAGGTTT	21	1	G1A	2.49167	0.6027	-1.47838	-0.513503	2.45413	2.60125
M17990	SNP	CAAGAGATTGTCAACAGGTTT	21	1	G1C	-0.78041	-1.20178	-0.479293	0.229948	0.894369	0.682034
M17991	SNP	TAAGAGATTGTCAACAGGTTT	21	1	G1T	1.21786	1.33815	2.69427	1.01392	0.417365	3.6803
M18052	SNP	AAGCCATGGTAGCGTCTCGCT	21	1	T1A	-1.47005	0.561535	-5.96484	0.235186	-4.43519	-0.946786
M18053	SNP	CAGCCATGGTAGCGTCTCGCT	21	1	T1C	-3.02303	1.93299	0.30256	0.0690359	1.66146	1.85803
M18054	SNP	GAGCCATGGTAGCGTCTCGCT	21	1	T1G	2.22553	0.37156	1.76848	-0.930196	-0.743054	0.587803
M15103	SNP	TAAGAGCTGATCCATTCAGCG	21	2	T2A	#N/A	#N/A	#N/A	#N/A	#N/A	#N/A
M15104	SNP	TCAGAGCTGATCCATTCAGCG	21	2	T2C	#N/A	#N/A	#N/A	#N/A	#N/A	#N/A
M15105	SNP	TGAGAGCTGATCCATTCAGCG	21	2	T2G	2.14751	-4.09484	0.0920768	-4.40111	1.23824	4.00767
M15292	SNP	GATAACGCATCTAAGGTATGG	21	2	C2A	0.0256375	1.69209	0.506441	2.7361	1.00543	-0.86774
M15293	SNP	GGTAACGCATCTAAGGTATGG	21	2	C2G	-0.686652	1.70751	1.57365	-1.40866	2.99838	0.0126242
M15294	SNP	GTTAACGCATCTAAGGTATGG	21	2	C2T	-0.419141	-0.176292	0.356635	1.90347	0.609896	-0.0725503
M15355	SNP	AAGGTTGCTTGTTCAGCGAAC	21	2	C2A	#N/A	#N/A	#N/A	#N/A	#N/A	#N/A
M15356	SNP	AGGGTTGCTTGTTCAGCGAAC	21	2	C2G	0.369132	-4.29897	-3.87598	-8.78702	-4.09357	-8.43651
M15357	SNP	ATGGTTGCTTGTTCAGCGAAC	21	2	C2T	-3.09339	1.81182	0.897988	-2.14245	-5.15942	-4.44183
M15478	SNP	CATCGCGAGTTGTGAGGCTGT	21	2	G2A	-0.662576	0.559688	-0.889301	-0.545371	0.963309	0.69647
M15479	SNP	CCTCGCGAGTTGTGAGGCTGT	21	2	G2C	3.12773	-0.9745	1.46897	-3.65788	-0.239841	-1.9973
M15480	SNP	CTTCGCGAGTTGTGAGGCTGT	21	2	G2T	-0.555584	-0.121424	0.191347	-0.620053	-1.52746	-1.09235
M15739	SNP	CACGCGAAAGAGCCCGGACAC	21	2	T2A	-5.00368	-2.99646	-2.56167	-2.00104	2.53586	-1.31016
M15740	SNP	CCCGCGAAAGAGCCCGGACAC	21	2	T2C	-0.995001	3.93889	0.841714	-2.75681	0.898389	4.70207
M15741	SNP	CGCGCGAAAGAGCCCGGACAC	21	2	T2G	-1.38426	-2.62303	1.00742	-4.51033	2.64606	-0.993307
M16132	SNP	GCGGGAGAAGCCGAAACCGGC	21	2	A2C	2.93196	-0.557789	2.88421	-0.674782	-3.451	0.930601
M16133	SNP	GGGGGAGAAGCCGAAACCGGC	21	2	A2G	2.59529	1.40869	2.06184	0.518571	1.24196	1.47529
M16134	SNP	GTGGGAGAAGCCGAAACCGGC	21	2	A2T	1.22542	-0.193435	2.5402	2.29401	4.51675	1.57252
M16195	SNP	CAACGGTAAAAGTGCGCGCCG	21	2	C2A	-1.22026	-0.510905	-0.534962	-1.77165	0.880396	-0.860632
M16196	SNP	CGACGGTAAAAGTGCGCGCCG	21	2	C2G	-0.577574	0.170928	-1.48972	0.557382	-1.39914	-2.25788
M16197	SNP	CTACGGTAAAAGTGCGCGCCG	21	2	C2T	-0.348337	-0.145755	-0.481836	-0.317655	0.210753	0.997787
M15163	SNP	CGTATGGAACCACGCTATGT	20	1	A1C	-1.69368	1.2529	-1.13417	-4.28373	1.92338	-3.92314
M15164	SNP	GGTATGGAACCACGCTATGT	20	1	A1G	3.55418	0.165925	-0.206326	2.35148	0.12306	5.50949
M15165	SNP	TGTATGGAACCACGCTATGT	20	1	A1T	0.242439	0.403708	1.83742	1.36781	0.64754	3.51141
M15415	SNP	ACTGCCGGCCACGTGTTTTG	20	1	C1A	0.799361	1.20162	1.09502	1.75911	1.42856	1.62832
M15416	SNP	GCTGCCGGCCACGTGTTTTG	20	1	C1G	0.226928	0.515492	0.467233	0.970131	1.31109	1.11894
M15417	SNP	TCTGCCGGCCACGTGTTTTG	20	1	C1T	0.442893	-0.149164	0.476035	2.58745	1.21162	1.82287
M16069	SNP	CTGCCGGAGTTTGCTGCGAT	20	1	A1C	2.55757	1.04216	-0.0661877	-1.1507	-2.18125	1.16613
M16070	SNP	GTGCCGGAGTTTGCTGCGAT	20	1	A1G	1.77031	0.108653	1.43052	-0.0322226	-0.827666	0.624354
M16071	SNP	TTGCCGGAGTTTGCTGCGAT	20	1	A1T	1.36338	0.849115	0.935469	1.81995	2.2323	0.319161
M16384	SNP	AGGATTGTACCCCTCGATGC	20	1	C1A	0.884375	3.19152	1.43621	0.205231	0.413931	-0.824179
M16385	SNP	GGGATTGTACCCCTCGATGC	20	1	C1G	0.283046	1.4924	0.526277	1.51736	0.173466	2.52065
M16386	SNP	TGGATTGTACCCCTCGATGC	20	1	C1T	1.04895	1.70099	-0.170041	2.33257	0.350886	1.09322
M16513	SNP	ACACGATGACCCACTTCGCT	20	1	C1A	1.08747	1.07516	-2.06278	-0.360056	2.57071	-2.68499
M16514	SNP	GCACGATGACCCACTTCGCT	20	1	C1G	0.0123867	-6.36492	0.447671	-2.77133	0.530018	-2.86969
M16515	SNP	TCACGATGACCCACTTCGCT	20	1	C1T	-0.275081	0.490002	1.29694	-3.66805	-2.75361	-2.16955
M16837	SNP	AGCAACGTTCTGCGGCACTT	20	1	C1A	-2.66494	-4.0059	1.06781	-2.69935	4.51659	1.51591
M16838	SNP	GGCAACGTTCTGCGGCACTT	20	1	C1G	2.54642	-0.911461	3.26146	2.99896	1.12427	-0.259271
M16839	SNP	TGCAACGTTCTGCGGCACTT	20	1	C1T	-4.11339	-1.46204	-0.313692	0.499661	1.39457	1.42465
M17035	SNP	CCGACCGGGAGTCCAGTTCG	20	1	A1C	0.37103	2.36515	4.46368	1.36464	-0.655316	0.0795488
M17036	SNP	GCGACCGGGAGTCCAGTTCG	20	1	A1G	-0.397576	1.64318	3.07558	0.806665	-0.553603	-1.61598
M17037	SNP	TCGACCGGGAGTCCAGTTCG	20	1	A1T	0.790638	2.06425	4.28343	2.26131	-0.0632024	0.577859
M17290	SNP	CGAGAAAGATCGCGAGGAAG	20	1	A1C	0.472746	-2.40538	3.67547	4.13772	-2.14719	0.826641
M17291	SNP	GGAGAAAGATCGCGAGGAAG	20	1	A1G	1.14756	2.47579	1.69419	0.22652	1.79495	1.73478
M17292	SNP	TGAGAAAGATCGCGAGGAAG	20	1	A1T	1.98687	0.0662766	2.73932	2.2274	0.97025	0.663732
M17350	SNP	ATAGGGAGCGTCAACGCTTA	20	1	G1A	-2.33884	4.07116	1.85423	1.95585	-3.53914	2.20564
M17351	SNP	CTAGGGAGCGTCAACGCTTA	20	1	G1C	0.339372	0.832441	-3.4503	-0.599727	-4.21666	1.03495
M17352	SNP	TTAGGGAGCGTCAACGCTTA	20	1	G1T	-0.321144	-2.18556	-4.61818	-1.25611	0.799193	-2.86827
M17614	SNP	CCTTTACGTACGCGCCAGTT	20	1	A1C	-2.23011	1.87505	0.191271	-1.50413	3.4347	1.85006
M17615	SNP	GCTTTACGTACGCGCCAGTT	20	1	A1G	-0.712251	0.669145	-1.10808	-0.334247	4.27147	1.06476
M17616	SNP	TCTTTACGTACGCGCCAGTT	20	1	A1T	-1.47742	1.2042	0.826101	-1.02755	2.92746	1.06327
M17674	SNP	AAAGAGATTGTCAACAGGTT	20	1	G1A	0.0533801	0.906292	1.14606	0.14256	1.13396	2.13277
M17675	SNP	CAAGAGATTGTCAACAGGTT	20	1	G1C	0.123143	2.30398	1.13554	0.193563	-0.834208	-0.816395
M17676	SNP	TAAGAGATTGTCAACAGGTT	20	1	G1T	1.25875	2.93757	1.09317	1.94739	-1.00675	-0.0314532
M17929	SNP	AAGTATGGAACCACGCTATG	20	1	C1A	-2.91836	1.24923	0.685911	-2.09117	4.46301	-0.286092
M17930	SNP	GAGTATGGAACCACGCTATG	20	1	C1G	-0.227394	3.14899	0.848629	2.09277	2.97477	0.996653
M17931	SNP	TAGTATGGAACCACGCTATG	20	1	C1T	1.30911	0.593916	3.41115	2.08524	2.17309	0.174646
M15166	SNP	AATATGGAACCACGCTATGT	20	2	G2A	-2.11815	2.83747	1.85499	-0.303656	4.38795	-1.61303
M15167	SNP	ACTATGGAACCACGCTATGT	20	2	G2C	2.3628	-2.84892	3.86204	-2.70228	1.27318	0.305149
M15168	SNP	ATTATGGAACCACGCTATGT	20	2	G2T	1.78103	4.09692	-0.076214	2.22691	-2.05188	1.11488
M15418	SNP	CATGCCGGCCACGTGTTTTG	20	2	C2A	0.398239	0.73526	-0.340887	0.999813	1.49959	1.25535
M15419	SNP	CGTGCCGGCCACGTGTTTTG	20	2	C2G	1.41635	1.78038	1.44246	0.317712	2.20795	1.91237
M15420	SNP	CTTGCCGGCCACGTGTTTTG	20	2	C2T	-0.00553129	-0.540606	0.494979	0.162431	0.458403	0.956451
M16072	SNP	AAGCCGGAGTTTGCTGCGAT	20	2	T2A	0.543063	-0.495152	0.137944	0.159177	1.23822	-0.102527
M16073	SNP	ACGCCGGAGTTTGCTGCGAT	20	2	T2C	-4.42125	-3.16723	0.382827	-3.47031	-3.53307	-2.6316
M16074	SNP	AGGCCGGAGTTTGCTGCGAT	20	2	T2G	0.997796	2.55879	1.53434	1.00641	1.39016	-1.04231
M16387	SNP	CAGATTGTACCCCTCGATGC	20	2	G2A	1.68246	-1.22085	-2.17663	1.00872	-1.0083	-2.3819
M16388	SNP	CCGATTGTACCCCTCGATGC	20	2	G2C	1.50674	-0.621782	-0.292001	-1.761	-0.681199	-2.24631
M16389	SNP	CTGATTGTACCCCTCGATGC	20	2	G2T	1.57573	-1.29396	-3.10463	2.05852	-2.2045	-3.92797
M16516	SNP	CAACGATGACCCACTTCGCT	20	2	C2A	-0.128918	3.65686	-0.349541	-0.952515	-2.49059	0.285235
M16517	SNP	CGACGATGACCCACTTCGCT	20	2	C2G	-2.70166	-1.10951	-0.684514	1.86512	-2.56441	-2.95847
M16518	SNP	CTACGATGACCCACTTCGCT	20	2	C2T	0.731805	-3.74302	3.9237	-3.20346	1.48023	-2.52151
M16840	SNP	CACAACGTTCTGCGGCACTT	20	2	G2A	0.51556	0.641188	-0.705049	-0.42039	-2.55457	1.52378
M16841	SNP	CCCAACGTTCTGCGGCACTT	20	2	G2C	-1.5494	-1.08185	-2.15626	0.565007	0.151779	0.641046
M16842	SNP	CTCAACGTTCTGCGGCACTT	20	2	G2T	0.372296	-1.63798	-0.869536	0.458092	-1.25668	-0.364908
M17038	SNP	AAGACCGGGAGTCCAGTTCG	20	2	C2A	-0.758188	0.867212	2.65689	0.916204	0.0589239	-3.10953
M17039	SNP	AGGACCGGGAGTCCAGTTCG	20	2	C2G	0.429102	1.94539	2.71389	0.00477996	3.91013	-4.19265
M17040	SNP	ATGACCGGGAGTCCAGTTCG	20	2	C2T	-1.90058	0.282868	1.01374	5.28952	-1.44324	1.12032
M17293	SNP	AAAGAAAGATCGCGAGGAAG	20	2	G2A	1.08811	1.68104	0.199492	1.14766	-0.211873	0.839728
M17294	SNP	ACAGAAAGATCGCGAGGAAG	20	2	G2C	0.681415	2.65467	0.528778	1.65799	3.12287	1.13448
M17295	SNP	ATAGAAAGATCGCGAGGAAG	20	2	G2T	1.25825	-0.590239	0.207803	1.2688	2.53025	0.928105
M15232	SNP	ACGAATGCTGGTTTGTAAAACA	22	4	G4A	4.8626	0.697036	3.29816	5.67148	-0.0161183	-3.1811
M15233	SNP	ACGCATGCTGGTTTGTAAAACA	22	4	G4C	-6.80938	-3.94769	-0.497132	1.813	0.0132405	-6.82067
M15234	SNP	ACGTATGCTGGTTTGTAAAACA	22	4	G4T	0.234503	2.53287	0.062072	0.596381	3.98262	-0.583847
M15547	SNP	ATCAAACTTGATGTTAGTACCG	22	4	T4A	-5.84077	-4.22982	0.799888	-1.01407	1.30647	3.71361
M15548	SNP	ATCCAACTTGATGTTAGTACCG	22	4	T4C	-5.87041	-4.58449	-0.203564	-3.88462	-3.40429	-1.96825
M15549	SNP	ATCGAACTTGATGTTAGTACCG	22	4	T4G	0.209184	0.866462	-4.85418	-1.33429	-2.00487	-0.264154
M15613	SNP	ACGAACGGCTCTCATAGGAAGA	22	4	T4A	2.1361	0.0427456	2.2991	-1.43043	-2.52888	-1.80803
M15614	SNP	ACGCACGGCTCTCATAGGAAGA	22	4	T4C	2.99673	-1.63751	2.67413	1.67843	-2.00718	1.89614
M15615	SNP	ACGGACGGCTCTCATAGGAAGA	22	4	T4G	1.52235	-2.82225	-1.06213	0.631275	1.74565	-0.149337
M15679	SNP	GGCAGTAGCAGGAGCGTGCGTC	22	4	T4A	-0.0479864	-3.87724	0.38939	-1.55015	-3.49915	-1.59965
M15680	SNP	GGCCGTAGCAGGAGCGTGCGTC	22	4	T4C	-0.646864	-3.4838	1.70558	0.977296	-2.51836	1.28688
M15681	SNP	GGCGGTAGCAGGAGCGTGCGTC	22	4	T4G	-1.33827	0.656618	-2.23788	0.135975	-2.60905	-3.34563
M15877	SNP	TGCAATTGCTGAGGGAATCGGG	22	4	G4A	-2.67961	-2.0575	-0.838816	-3.15652	-3.85721	4.40436
M15878	SNP	TGCCATTGCTGAGGGAATCGGG	22	4	G4C	1.21131	1.37663	-0.0474811	2.70861	-2.53525	1.121
M15879	SNP	TGCTATTGCTGAGGGAATCGGG	22	4	G4T	0.00808674	2.20579	0.0241035	-0.962962	3.27403	0.514622
M15943	SNP	ATGCAAGCACCGACCCCTTTCT	22	4	A4C	-0.427605	-0.580877	1.16302	0.435828	0.658819	1.23687
M15944	SNP	ATGGAAGCACCGACCCCTTTCT	22	4	A4G	2.09782	1.37482	2.22652	2.78194	1.52407	0.0262322
M15945	SNP	ATGTAAGCACCGACCCCTTTCT	22	4	A4T	-0.634619	1.70294	2.2222	0.90836	3.00649	2.23122
M16327	SNP	AGCAAGGTCCGTCCCACCGAAG	22	4	G4A	0.516052	2.63109	-2.19169	0.242592	-0.671532	-2.9193
M16328	SNP	AGCCAGGTCCGTCCCACCGAAG	22	4	G4C	-0.788759	-1.17846	-0.0959452	2.67568	-2.03064	0.796105
M16329	SNP	AGCTAGGTCCGTCCCACCGAAG	22	4	G4T	-2.07277	-1.09653	-1.66928	-0.997194	0.339474	1.13721
M16651	SNP	GCGAATCACCGCTTCCAGTAGC	22	4	G4A	#N/A	#N/A	#N/A	#N/A	#N/A	#N/A
M16652	SNP	GCGCATCACCGCTTCCAGTAGC	22	4	G4C	0.281438	-0.742766	-0.546698	-3.94354	-3.19906	-4.02275
M16653	SNP	GCGTATCACCGCTTCCAGTAGC	22	4	G4T	-1.68621	-0.868598	-1.17122	1.70988	1.03581	-2.521
M16780	SNP	AAGACTGTGAACGCGAGTTAGA	22	4	C4A	0.848331	-0.235051	-2.70419	3.4222	-0.284484	-0.392978
M16781	SNP	AAGGCTGTGAACGCGAGTTAGA	22	4	C4G	0.0550204	-3.116	-1.17751	-0.924453	-2.47038	-2.21428
M16782	SNP	AAGTCTGTGAACGCGAGTTAGA	22	4	C4T	-0.110519	0.704952	-0.898534	1.03805	1.81234	0.839432
M17104	SNP	GTGAGAGAAAACTCCACACCAG	22	4	G4A	0.971678	0.0350734	-3.58809	-4.26298	1.9624	-5.6947
M17105	SNP	GTGCGAGAAAACTCCACACCAG	22	4	G4C	#N/A	#N/A	#N/A	#N/A	#N/A	#N/A
M17106	SNP	GTGTGAGAAAACTCCACACCAG	22	4	G4T	#N/A	#N/A	#N/A	#N/A	#N/A	#N/A
M17233	SNP	AACCGTCTGGGTTGCCACTTTA	22	4	A4C	-5.02082	0.141167	-4.9884	-3.32686	-0.0280741	-2.2006
M17234	SNP	AACGGTCTGGGTTGCCACTTTA	22	4	A4G	0.472991	-4.42099	1.22474	-3.14203	0.0838795	-3.84808
M17235	SNP	AACTGTCTGGGTTGCCACTTTA	22	4	A4T	-2.57338	3.67902	-0.470454	0.13705	-2.99196	-3.07047
M17419	SNP	GTACCGGTTGCTTGTTCAGCGA	22	4	A4C	0.446993	-4.42048	1.16862	-5.59023	3.03145	3.19812
M17420	SNP	GTAGCGGTTGCTTGTTCAGCGA	22	4	A4G	-0.127792	0.395042	-0.759475	-1.16661	2.31222	1.22747
M17421	SNP	GTATCGGTTGCTTGTTCAGCGA	22	4	A4T	-0.00533287	-1.14747	0.0306215	1.26418	-1.09334	-2.00251
M14980	SNP	CTCAAAGGAAGAAACTCTTGAA	22	5	T5A	-4.33853	-3.99285	1.6588	-9.56167	-0.30826	-6.59072
M14981	SNP	CTCACAGGAAGAAACTCTTGAA	22	5	T5C	#N/A	#N/A	#N/A	#N/A	#N/A	#N/A
M14982	SNP	CTCAGAGGAAGAAACTCTTGAA	22	5	T5G	-6.65397	0.291728	0.890712	2.34503	-0.803067	2.54286
M15046	SNP	AGCACGACGGAAACCCGAGGTA	22	5	A5C	-0.199271	-0.301712	1.20129	1.63028	-2.36785	-1.5512
M15047	SNP	AGCAGGACGGAAACCCGAGGTA	22	5	A5G	-1.41233	-1.2972	-1.20841	-1.91648	0.184012	-6.71904
M15048	SNP	AGCATGACGGAAACCCGAGGTA	22	5	A5T	-0.571446	-2.32277	-0.21083	0.392762	0.730671	1.70964
M15235	SNP	ACGGCTGCTGGTTTGTAAAACA	22	5	A5C	0.351535	1.01224	-0.278626	-1.24904	1.06248	-0.713407
M15236	SNP	ACGGGTGCTGGTTTGTAAAACA	22	5	A5G	0.364744	0.808394	0.461733	0.611718	-1.60242	-2.1329
M15237	SNP	ACGGTTGCTGGTTTGTAAAACA	22	5	A5T	-1.99511	-0.616478	0.153359	0.248965	-0.20548	-2.08662
M15550	SNP	ATCTCACTTGATGTTAGTACCG	22	5	A5C	-0.611878	-1.84534	-0.305952	0.417584	-0.966986	0.854895
M15551	SNP	ATCTGACTTGATGTTAGTACCG	22	5	A5G	-1.7483	0.293155	2.57093	3.40073	0.785838	2.47209
M15552	SNP	ATCTTACTTGATGTTAGTACCG	22	5	A5T	2.65124	4.80771	0.765903	1.44899	-1.25653	-3.38082
M15616	SNP	ACGTCCGGCTCTCATAGGAAGA	22	5	A5C	1.65349	1.02068	-3.00703	0.30315	-2.71018	-2.68716
M15617	SNP	ACGTGCGGCTCTCATAGGAAGA	22	5	A5G	1.24734	-1.22372	3.23439	1.32917	0.616175	1.05291
M15618	SNP	ACGTTCGGCTCTCATAGGAAGA	22	5	A5T	2.87655	-0.166217	3.28944	-1.05812	2.04958	0.590367
M15682	SNP	GGCTATAGCAGGAGCGTGCGTC	22	5	G5A	-0.947811	0.718746	1.03984	4.10443	3.12172	-0.026932
M15683	SNP	GGCTCTAGCAGGAGCGTGCGTC	22	5	G5C	-2.64193	-4.35013	-6.68164	-0.0471623	-9.39721	1.41504
M15684	SNP	GGCTTTAGCAGGAGCGTGCGTC	22	5	G5T	-0.952662	-1.70133	-5.77044	0.986902	-2.75918	-1.32777
M15880	SNP	TGCGCTTGCTGAGGGAATCGGG	22	5	A5C	0.348745	-4.62841	-0.0472411	-0.802248	3.21976	-3.65355
M15881	SNP	TGCGGTTGCTGAGGGAATCGGG	22	5	A5G	0.144095	1.15664	1.85437	1.46718	0.393752	-0.709809
M15882	SNP	TGCGTTTGCTGAGGGAATCGGG	22	5	A5T	1.18794	-2.74047	-3.3357	1.63582	0.410407	0.909933
M15946	SNP	ATGACAGCACCGACCCCTTTCT	22	5	A5C	-1.38995	-4.08893	-0.072953	1.30347	-4.42598	0.907405
M15947	SNP	ATGAGAGCACCGACCCCTTTCT	22	5	A5G	1.91705	1.68238	1.45284	1.21202	0.736933	1.50091
M15948	SNP	ATGATAGCACCGACCCCTTTCT	22	5	A5T	1.74147	-2.10128	1.06872	0.575224	0.110898	0.950768
M16330	SNP	AGCGCGGTCCGTCCCACCGAAG	22	5	A5C	-1.0752	-0.760282	-0.623563	-0.346162	0.160842	0.6732
M16331	SNP	AGCGGGGTCCGTCCCACCGAAG	22	5	A5G	0.877892	-0.420847	0.436237	-0.751781	1.2424	-1.22664
M16332	SNP	AGCGTGGTCCGTCCCACCGAAG	22	5	A5T	-0.195275	-1.85535	-2.39735	0.210133	-0.709572	3.01205
M16654	SNP	GCGGCTCACCGCTTCCAGTAGC	22	5	A5C	-2.35133	0.386652	-1.82242	-1.79174	1.5749	-1.54944
M16655	SNP	GCGGGTCACCGCTTCCAGTAGC	22	5	A5G	-1.75413	-1.83803	0.530629	2.84338	0.788413	1.90162
M16656	SNP	GCGGTTCACCGCTTCCAGTAGC	22	5	A5T	-3.19254	-2.99954	-6.24076	-5.58301	-6.11445	-5.88881
M16258	SNP	CAGGCGTTAGCCACTCCGAAG	21	2	C2A	#N/A	#N/A	#N/A	#N/A	#N/A	#N/A
M16259	SNP	CGGGCGTTAGCCACTCCGAAG	21	2	C2G	#N/A	#N/A	#N/A	#N/A	#N/A	#N/A
M16260	SNP	CTGGCGTTAGCCACTCCGAAG	21	2	C2T	0.182667	-3.32228	-5.14387	-1.42694	-3.87946	0.93548
M16711	SNP	AACAACGGATTTGAGCCGGCG	21	2	C2A	0.568014	0.861279	0.237296	-1.56384	-1.27569	-2.40662
M16712	SNP	AGCAACGGATTTGAGCCGGCG	21	2	C2G	1.98508	0.1457	-2.88867	-2.91415	-2.63152	-0.0729995
M16713	SNP	ATCAACGGATTTGAGCCGGCG	21	2	C2T	-0.827451	0.833866	-1.6079	-1.12967	-2.61035	-3.29842
M17164	SNP	GATTCCAGTAGCGACAGAAGC	21	2	C2A	-5.51495	-0.266467	1.77349	-1.37147	-4.99842	-5.10846
M17165	SNP	GGTTCCAGTAGCGACAGAAGC	21	2	C2G	#N/A	#N/A	#N/A	#N/A	#N/A	#N/A
M17166	SNP	GTTTCCAGTAGCGACAGAAGC	21	2	C2T	1.22171	0.130832	-0.335309	2.96284	-4.2704	1.51187
M17806	SNP	CCGGCTCCTTACAGGCAGCCC	21	2	A2C	2.0205	0.680986	-4.97254	-2.51714	-4.16192	-8.59295
M17807	SNP	CGGGCTCCTTACAGGCAGCCC	21	2	A2G	#N/A	#N/A	#N/A	#N/A	#N/A	#N/A
M17808	SNP	CTGGCTCCTTACAGGCAGCCC	21	2	A2T	-0.466403	-7.49274	1.23203	-1.87153	0.123065	0.678329
M17869	SNP	TAGAGCAGGACCCCGAAAGGG	21	2	T2A	0.529066	2.43758	-0.796537	1.77733	0.0207951	2.62722
M17870	SNP	TCGAGCAGGACCCCGAAAGGG	21	2	T2C	-2.54779	1.4645	2.28647	0.96517	-3.02746	2.62653
M17871	SNP	TGGAGCAGGACCCCGAAAGGG	21	2	T2G	1.22849	0.507333	0.929924	0.86517	3.47316	2.43829
M17992	SNP	GCAGAGATTGTCAACAGGTTT	21	2	A2C	1.55588	-1.37532	0.956921	3.95396	-2.09441	-0.0627123
M17993	SNP	GGAGAGATTGTCAACAGGTTT	21	2	A2G	0.312465	0.330742	1.4256	2.7146	-0.461534	-0.564495
M17994	SNP	GTAGAGATTGTCAACAGGTTT	21	2	A2T	1.48664	3.57524	-0.822744	1.16101	-1.39233	1.65685
M18055	SNP	TCGCCATGGTAGCGTCTCGCT	21	2	A2C	-0.912384	-4.76497	-0.379061	-3.14684	2.11717	-2.20189
M18056	SNP	TGGCCATGGTAGCGTCTCGCT	21	2	A2G	-2.53244	-0.422541	-0.975357	-1.0994	0.613557	0.889031
M18057	SNP	TTGCCATGGTAGCGTCTCGCT	21	2	A2T	1.87953	-2.78713	0.946399	0.212494	0.628863	1.02018
M15106	SNP	TTCGAGCTGATCCATTCAGCG	21	3	A3C	4.49633	2.17193	0.76568	1.27204	3.22904	1.71401
M15107	SNP	TTGGAGCTGATCCATTCAGCG	21	3	A3G	-3.404	-0.544408	-0.479594	2.42675	2.99219	-2.8928
M15108	SNP	TTTGAGCTGATCCATTCAGCG	21	3	A3T	-7.13429	-0.206654	3.18929	-4.25449	4.35349	1.87978
M15295	SNP	GCAAACGCATCTAAGGTATGG	21	3	T3A	0.348575	0.0282282	1.50306	3.96301	-0.498429	1.05997
M15296	SNP	GCCAACGCATCTAAGGTATGG	21	3	T3C	1.6978	2.69442	1.44404	-1.06485	-2.96656	0.340038
M15297	SNP	GCGAACGCATCTAAGGTATGG	21	3	T3G	-1.23792	0.627049	2.53147	1.94219	-0.762639	2.4372
M15358	SNP	ACAGTTGCTTGTTCAGCGAAC	21	3	G3A	#N/A	#N/A	#N/A	#N/A	#N/A	#N/A
M15359	SNP	ACCGTTGCTTGTTCAGCGAAC	21	3	G3C	#N/A	#N/A	#N/A	#N/A	#N/A	#N/A
M15360	SNP	ACTGTTGCTTGTTCAGCGAAC	21	3	G3T	-3.02742	-2.60763	-3.02129	6.18976	0.0467001	-4.10187
M15481	SNP	CGACGCGAGTTGTGAGGCTGT	21	3	T3A	-3.09801	-0.689437	0.631103	-2.40677	3.19297	-2.54459
M15482	SNP	CGCCGCGAGTTGTGAGGCTGT	21	3	T3C	0.713573	0.015552	0.459801	0.551961	-0.388069	-0.293822
M15483	SNP	CGGCGCGAGTTGTGAGGCTGT	21	3	T3G	-0.0733532	0.425601	-0.0227837	0.217622	0.506158	1.58776
M15742	SNP	CTAGCGAAAGAGCCCGGACAC	21	3	C3A	-3.09397	-3.64573	-2.30339	-3.95364	-3.97153	-4.3095
M15743	SNP	CTGGCGAAAGAGCCCGGACAC	21	3	C3G	-2.24866	0.658376	-5.62864	-0.636094	-0.679014	-2.63207
M15744	SNP	CTTGCGAAAGAGCCCGGACAC	21	3	C3T	-2.16351	3.45507	3.29024	-0.252938	3.20596	-2.06863
M16135	SNP	GAAGGAGAAGCCGAAACCGGC	21	3	G3A	-5.17194	-4.52714	-2.87138	-1.67908	1.54383	1.1327
M16136	SNP	GACGGAGAAGCCGAAACCGGC	21	3	G3C	-0.837322	-3.22513	-3.52886	-2.45854	-3.49198	-4.10683
M16137	SNP	GATGGAGAAGCCGAAACCGGC	21	3	G3T	-5.70757	-3.57405	-4.62484	-3.72178	-3.36672	-3.92114
M16198	SNP	CCCCGGTAAAAGTGCGCGCCG	21	3	A3C	-1.04993	0.943278	1.59014	0.261528	-1.34369	-1.53096
M16199	SNP	CCGCGGTAAAAGTGCGCGCCG	21	3	A3G	-1.02264	-0.694316	-0.869772	-0.901548	-2.08917	0.217624
M16200	SNP	CCTCGGTAAAAGTGCGCGCCG	21	3	A3T	-1.59757	-1.6999	-1.27496	-0.68628	-1.48698	0.978262
M16261	SNP	CCAGCGTTAGCCACTCCGAAG	21	3	G3A	-5.18979	-3.42273	-1.20449	-5.85369	-8.06924	-3.8045
M16262	SNP	CCCGCGTTAGCCACTCCGAAG	21	3	G3C	-1.77179	5.25571	1.29367	0.290427	0.693982	-3.92649
M16263	SNP	CCTGCGTTAGCCACTCCGAAG	21	3	G3T	-1.9181	-2.99148	2.37337	-3.03236	-3.57268	2.94311
M16714	SNP	ACAAACGGATTTGAGCCGGCG	21	3	C3A	-1.13837	-0.460634	0.63507	-2.31001	0.751938	0.781547
M16715	SNP	ACGAACGGATTTGAGCCGGCG	21	3	C3G	-4.03107	0.866669	-1.33748	-3.93786	-4.84242	0.461318
M16716	SNP	ACTAACGGATTTGAGCCGGCG	21	3	C3T	3.02209	-3.2289	4.20876	-1.20129	2.19002	-2.60618
M17167	SNP	GCATCCAGTAGCGACAGAAGC	21	3	T3A	-0.689108	-1.79018	3.70835	0.806178	-3.80556	1.36271
M17168	SNP	GCCTCCAGTAGCGACAGAAGC	21	3	T3C	-0.300477	-1.99887	2.5602	1.28377	0.755533	-4.78322
M17169	SNP	GCGTCCAGTAGCGACAGAAGC	21	3	T3G	-0.22733	-4.59966	-2.27127	-0.820981	-4.07798	-5.17622
M17809	SNP	CAAGCTCCTTACAGGCAGCCC	21	3	G3A	#N/A	#N/A	#N/A	#N/A	#N/A	#N/A
M17810	SNP	CACGCTCCTTACAGGCAGCCC	21	3	G3C	#N/A	#N/A	#N/A	#N/A	#N/A	#N/A
M17811	SNP	CATGCTCCTTACAGGCAGCCC	21	3	G3T	#N/A	#N/A	#N/A	#N/A	#N/A	#N/A
M17872	SNP	TTAAGCAGGACCCCGAAAGGG	21	3	G3A	1.55741	1.71504	-0.202848	3.15295	0.617994	1.28272
M17873	SNP	TTCAGCAGGACCCCGAAAGGG	21	3	G3C	1.66275	-1.42284	2.68903	-1.52255	1.55534	2.56352
M17874	SNP	TTTAGCAGGACCCCGAAAGGG	21	3	G3T	3.69338	-3.28376	1.20804	-0.0545665	-2.70196	4.24244
M17995	SNP	GACGAGATTGTCAACAGGTTT	21	3	A3C	0.967466	-0.316805	1.68313	-0.839039	2.00149	1.95456
M17996	SNP	GAGGAGATTGTCAACAGGTTT	21	3	A3G	2.93038	2.01629	0.473938	0.93841	0.0832608	2.11237
M17997	SNP	GATGAGATTGTCAACAGGTTT	21	3	A3T	1.21598	1.24711	2.07101	0.755025	-0.262152	-1.15915
M18058	SNP	TAACCATGGTAGCGTCTCGCT	21	3	G3A	-1.11404	0.552744	-4.77511	-3.72542	-1.05608	-2.85153
M18059	SNP	TACCCATGGTAGCGTCTCGCT	21	3	G3C	-0.899203	2.78888	0.0310107	0.325764	-5.60255	2.81021
M18060	SNP	TATCCATGGTAGCGTCTCGCT	21	3	G3T	0.729886	-2.7279	2.31864	-2.03522	0.240448	-4.6613
M15109	SNP	TTAAAGCTGATCCATTCAGCG	21	4	G4A	#N/A	#N/A	#N/A	#N/A	#N/A	#N/A
M15110	SNP	TTACAGCTGATCCATTCAGCG	21	4	G4C	1.04423	-8.47129	-0.731285	-4.46753	-5.10773	-3.29341
M15111	SNP	TTATAGCTGATCCATTCAGCG	21	4	G4T	0.0537432	1.12206	1.3118	1.94323	0.170856	1.10653
M15298	SNP	GCTCACGCATCTAAGGTATGG	21	4	A4C	1.19734	1.23762	-0.342413	1.71559	1.61328	-1.34131
M15299	SNP	GCTGACGCATCTAAGGTATGG	21	4	A4G	2.83119	-0.680865	0.0664475	1.72053	1.94399	0.363737
M15300	SNP	GCTTACGCATCTAAGGTATGG	21	4	A4T	1.80323	-0.818273	0.892637	2.18667	3.01839	-1.5717
M15361	SNP	ACGATTGCTTGTTCAGCGAAC	21	4	G4A	3.41693	-1.66146	-1.70102	-3.73879	-3.82352	-3.57082
M15362	SNP	ACGCTTGCTTGTTCAGCGAAC	21	4	G4C	#N/A	#N/A	#N/A	#N/A	#N/A	#N/A
M15363	SNP	ACGTTTGCTTGTTCAGCGAAC	21	4	G4T	#N/A	#N/A	#N/A	#N/A	#N/A	#N/A
M15484	SNP	CGTAGCGAGTTGTGAGGCTGT	21	4	C4A	-0.930982	-0.912759	-0.233685	1.30022	-0.358996	0.208324
M15485	SNP	CGTGGCGAGTTGTGAGGCTGT	21	4	C4G	0.197276	-0.198452	0.412998	-0.268499	0.996776	0.0580585
M15486	SNP	CGTTGCGAGTTGTGAGGCTGT	21	4	C4T	0.425853	-0.228059	-0.117674	-0.316415	1.29631	0.398446
M15745	SNP	CTCACGAAAGAGCCCGGACAC	21	4	G4A	-0.156565	0.226284	-2.24179	-2.17218	-0.874379	-4.18009
M15746	SNP	CTCCCGAAAGAGCCCGGACAC	21	4	G4C	-1.75069	0.641467	-0.751985	0.412882	-2.45083	-4.39
M15747	SNP	CTCTCGAAAGAGCCCGGACAC	21	4	G4T	2.03948	-1.97024	-1.50899	2.66487	-0.0309757	-0.994813
M16138	SNP	GAGAGAGAAGCCGAAACCGGC	21	4	G4A	-2.47678	-4.49917	-2.96807	-5.82572	0.669931	-3.65106
M16139	SNP	GAGCGAGAAGCCGAAACCGGC	21	4	G4C	1.27801	-5.58329	-1.26089	-3.60938	-1.057	-4.51977
M16140	SNP	GAGTGAGAAGCCGAAACCGGC	21	4	G4T	1.04068	1.24723	-0.730902	1.41751	0.72908	-4.07904
M16201	SNP	CCAAGGTAAAAGTGCGCGCCG	21	4	C4A	-0.147046	-1.19091	-0.590638	1.33213	-1.8069	-1.00228
M16202	SNP	CCAGGGTAAAAGTGCGCGCCG	21	4	C4G	0.124662	-0.490437	0.0343714	-0.542601	-0.139715	0.77414
M16203	SNP	CCATGGTAAAAGTGCGCGCCG	21	4	C4T	-0.950555	-0.408123	-0.289825	0.223407	1.77155	-2.47741
M16264	SNP	CCGACGTTAGCCACTCCGAAG	21	4	G4A	-1.04347	0.340118	-1.30409	-3.21913	-0.990683	0.81373
M16265	SNP	CCGCCGTTAGCCACTCCGAAG	21	4	G4C	-1.32739	0.668194	-3.13197	1.08542	-0.879399	-2.80107
M16266	SNP	CCGTCGTTAGCCACTCCGAAG	21	4	G4T	-7.85247	-1.77755	-8.54867	-3.8928	-2.54823	-3.9966
M16717	SNP	ACCCACGGATTTGAGCCGGCG	21	4	A4C	1.92213	1.23838	0.612512	0.238267	0.526273	0.182462
M16718	SNP	ACCGACGGATTTGAGCCGGCG	21	4	A4G	-1.79256	0.885519	0.868913	-0.121777	0.853318	-0.102042
M16719	SNP	ACCTACGGATTTGAGCCGGCG	21	4	A4T	3.64089	-1.87613	0.746958	-0.848785	2.28108	-2.31487
M17170	SNP	GCTACCAGTAGCGACAGAAGC	21	4	T4A	-0.401996	-4.87473	0.536972	1.73596	-5.94327	-1.07292
M17171	SNP	GCTCCCAGTAGCGACAGAAGC	21	4	T4C	0.355575	-0.274271	-2.59066	-0.432989	2.05383	2.10788
M17172	SNP	GCTGCCAGTAGCGACAGAAGC	21	4	T4G	-1.23758	-0.889633	-3.10842	-3.42961	-6.28706	-4.95618
M17812	SNP	CAGACTCCTTACAGGCAGCCC	21	4	G4A	-5.35161	2.40343	-4.25835	-4.38801	-5.00871	-2.77584
M17813	SNP	CAGCCTCCTTACAGGCAGCCC	21	4	G4C	2.79764	-0.180264	-4.12267	2.26077	-1.16339	-3.9834
M17814	SNP	CAGTCTCCTTACAGGCAGCCC	21	4	G4T	#N/A	#N/A	#N/A	#N/A	#N/A	#N/A
M17875	SNP	TTGCGCAGGACCCCGAAAGGG	21	4	A4C	1.54548	0.578938	0.570958	0.532846	1.9855	1.00817
M17876	SNP	TTGGGCAGGACCCCGAAAGGG	21	4	A4G	1.25799	1.24862	-0.17653	-0.647157	1.58908	-0.111036
M17877	SNP	TTGTGCAGGACCCCGAAAGGG	21	4	A4T	0.434568	0.460782	-0.159212	2.00571	2.91022	2.36712
M17998	SNP	GAAAAGATTGTCAACAGGTTT	21	4	G4A	1.16185	0.257244	1.1894	1.45341	1.62037	-1.28547
M17999	SNP	GAACAGATTGTCAACAGGTTT	21	4	G4C	2.11201	1.4942	0.657318	1.88805	-1.20685	2.4081
M18000	SNP	GAATAGATTGTCAACAGGTTT	21	4	G4T	0.68783	-0.450416	-0.034127	-0.119223	0.676568	2.82177
M18061	SNP	TAGACATGGTAGCGTCTCGCT	21	4	C4A	-3.27048	0.00482402	2.31607	-3.14409	2.9633	-2.27409
M18062	SNP	TAGGCATGGTAGCGTCTCGCT	21	4	C4G	1.87547	0.0419876	0.0986424	-3.15043	0.490891	0.869655
M18063	SNP	TAGTCATGGTAGCGTCTCGCT	21	4	C4T	-0.42623	3.03182	-2.78606	-2.41644	-2.22071	0.730496
M15112	SNP	TTAGCGCTGATCCATTCAGCG	21	5	A5C	#N/A	#N/A	#N/A	#N/A	#N/A	#N/A
M15113	SNP	TTAGGGCTGATCCATTCAGCG	21	5	A5G	#N/A	#N/A	#N/A	#N/A	#N/A	#N/A
M15114	SNP	TTAGTGCTGATCCATTCAGCG	21	5	A5T	-2.0822	-1.0141	3.164	-3.37905	-4.75132	-2.56519
M15301	SNP	GCTACCGCATCTAAGGTATGG	21	5	A5C	-0.228676	0.449919	3.73295	0.775839	-2.04728	2.18435
M15302	SNP	GCTAGCGCATCTAAGGTATGG	21	5	A5G	1.36826	1.05043	0.811339	0.527661	1.69209	1.01234
M15303	SNP	GCTATCGCATCTAAGGTATGG	21	5	A5T	3.61679	2.28238	1.2818	1.23379	3.10677	0.892656
M15364	SNP	ACGGATGCTTGTTCAGCGAAC	21	5	T5A	-1.90319	-0.527375	0.925424	-4.53154	-5.04899	-5.78541
M15365	SNP	ACGGCTGCTTGTTCAGCGAAC	21	5	T5C	#N/A	#N/A	#N/A	#N/A	#N/A	#N/A
M15366	SNP	ACGGGTGCTTGTTCAGCGAAC	21	5	T5G	0.697838	-0.500494	-3.60428	2.49881	-4.69847	-0.409555
M15487	SNP	CGTCACGAGTTGTGAGGCTGT	21	5	G5A	0.335655	-1.23208	0.404899	0.0648604	1.62828	-0.249946
M15488	SNP	CGTCCCGAGTTGTGAGGCTGT	21	5	G5C	1.00349	1.22135	0.280261	-0.154443	1.14757	1.16568
M15489	SNP	CGTCTCGAGTTGTGAGGCTGT	21	5	G5T	-0.362479	-0.461942	0.811704	-0.942994	0.501405	1.50438
M15748	SNP	CTCGAGAAAGAGCCCGGACAC	21	5	C5A	0.0621839	-1.1393	-0.341621	3.70886	-1.34081	0.150345
M15749	SNP	CTCGGGAAAGAGCCCGGACAC	21	5	C5G	-1.93513	-5.17211	-1.05675	-2.43743	-0.371625	-2.74511
M15750	SNP	CTCGTGAAAGAGCCCGGACAC	21	5	C5T	0.891705	-3.42663	-2.0197	2.33244	-3.21427	-1.23781
M16141	SNP	GAGGAAGAAGCCGAAACCGGC	21	5	G5A	#N/A	#N/A	#N/A	#N/A	#N/A	#N/A
M16142	SNP	GAGGCAGAAGCCGAAACCGGC	21	5	G5C	#N/A	#N/A	#N/A	#N/A	#N/A	#N/A
M16143	SNP	GAGGTAGAAGCCGAAACCGGC	21	5	G5T	-4.28347	1.84891	-4.86629	-1.81779	-1.66991	-3.15578
M16204	SNP	CCACAGTAAAAGTGCGCGCCG	21	5	G5A	0.846651	-3.50213	-0.196008	-1.28253	1.30332	0.76443
M16205	SNP	CCACCGTAAAAGTGCGCGCCG	21	5	G5C	-0.146051	-4.92784	-2.85866	-1.95453	-2.00334	-3.75209
M16206	SNP	CCACTGTAAAAGTGCGCGCCG	21	5	G5T	-1.15543	-1.72829	-2.18833	2.64996	-1.53114	-2.13013
M17353	SNP	GAAGGGAGCGTCAACGCTTA	20	2	T2A	0.559974	-1.72774	3.73664	1.38284	-0.52222	-0.908935
M17354	SNP	GCAGGGAGCGTCAACGCTTA	20	2	T2C	0.344508	-4.89336	0.342755	1.63827	-1.56439	-0.841749
M17355	SNP	GGAGGGAGCGTCAACGCTTA	20	2	T2G	2.21905	0.333808	-5.58521	0.105655	-0.511613	0.500214
M17617	SNP	AATTTACGTACGCGCCAGTT	20	2	C2A	0.374197	-1.45484	2.17227	-1.95706	1.99261	1.74099
M17618	SNP	AGTTTACGTACGCGCCAGTT	20	2	C2G	-1.73731	-1.85554	-0.184122	-0.438109	2.62499	-1.40195
M17619	SNP	ATTTTACGTACGCGCCAGTT	20	2	C2T	-0.380353	-0.209783	-1.50487	0.409126	2.12811	-1.03222
M17677	SNP	GCAGAGATTGTCAACAGGTT	20	2	A2C	1.69625	1.82305	1.3548	0.860182	0.988647	2.34779
M17678	SNP	GGAGAGATTGTCAACAGGTT	20	2	A2G	0.864119	2.18283	0.486493	1.68923	1.96089	1.30235
M17679	SNP	GTAGAGATTGTCAACAGGTT	20	2	A2T	3.24934	0.492523	1.38793	1.54685	-0.844015	-0.333849
M17932	SNP	CCGTATGGAACCACGCTATG	20	2	A2C	3.10813	0.26511	-1.75033	-0.198924	0.562641	3.64619
M17933	SNP	CGGTATGGAACCACGCTATG	20	2	A2G	2.0425	-1.63015	1.36387	-3.15585	3.32563	4.36589
M17934	SNP	CTGTATGGAACCACGCTATG	20	2	A2T	0.467242	-0.7336	1.37158	1.67256	1.56725	1.73566
M15169	SNP	AGAATGGAACCACGCTATGT	20	3	T3A	-3.31808	-0.146558	2.2744	-4.8837	-3.44685	-4.30045
M15170	SNP	AGCATGGAACCACGCTATGT	20	3	T3C	3.59357	0.824026	-1.48832	-1.45913	-1.8464	0.352483
M15171	SNP	AGGATGGAACCACGCTATGT	20	3	T3G	-1.46507	-3.34859	-0.910747	-1.44036	-2.41273	-4.56297
M15421	SNP	CCAGCCGGCCACGTGTTTTG	20	3	T3A	-1.01571	0.653879	0.209986	0.350708	-0.245987	1.35059
M15422	SNP	CCCGCCGGCCACGTGTTTTG	20	3	T3C	0.970182	0.932793	1.04957	-0.130413	2.09744	1.03418
M15423	SNP	CCGGCCGGCCACGTGTTTTG	20	3	T3G	1.60793	0.85291	0.969264	1.08509	1.94989	1.13784
M16075	SNP	ATACCGGAGTTTGCTGCGAT	20	3	G3A	1.3182	-2.55131	-1.30624	-1.13554	-1.70232	-3.4639
M16076	SNP	ATCCCGGAGTTTGCTGCGAT	20	3	G3C	-0.290414	-0.221536	3.38753	2.32188	1.41856	-1.93367
M16077	SNP	ATTCCGGAGTTTGCTGCGAT	20	3	G3T	-2.16289	3.44901	2.17047	-0.995168	-0.639408	5.55745
M16390	SNP	CGAATTGTACCCCTCGATGC	20	3	G3A	0.29354	2.74884	-1.8471	-0.122874	-1.5209	2.82002
M16391	SNP	CGCATTGTACCCCTCGATGC	20	3	G3C	1.64772	2.53693	0.89901	0.272461	3.21187	-4.10257
M16392	SNP	CGTATTGTACCCCTCGATGC	20	3	G3T	3.25181	0.954794	-2.27776	2.95953	-3.26991	1.00633
M16519	SNP	CCCCGATGACCCACTTCGCT	20	3	A3C	1.81878	-0.404802	-0.76681	-1.37053	-0.300126	0.428488
M16520	SNP	CCGCGATGACCCACTTCGCT	20	3	A3G	-3.343	0.166688	-3.65314	-2.76283	-2.35807	-2.18692
M16521	SNP	CCTCGATGACCCACTTCGCT	20	3	A3T	-4.56376	-4.33154	-0.313569	0.421171	-2.97544	1.93394
M16843	SNP	CGAAACGTTCTGCGGCACTT	20	3	C3A	0.891882	-2.86473	-1.16766	-3.91333	-2.75853	-4.84831
M16844	SNP	CGGAACGTTCTGCGGCACTT	20	3	C3G	-0.270271	1.56743	-0.366272	-0.0592919	-2.11522	1.67964
M16845	SNP	CGTAACGTTCTGCGGCACTT	20	3	C3T	-1.27532	-0.312686	-0.738578	-5.21237	-4.27015	1.16547
M17041	SNP	ACAACCGGGAGTCCAGTTCG	20	3	G3A	#N/A	#N/A	#N/A	#N/A	#N/A	#N/A
M17042	SNP	ACCACCGGGAGTCCAGTTCG	20	3	G3C	-1.48964	-3.78185	1.96	-3.88012	-2.66252	1.35367
M17043	SNP	ACTACCGGGAGTCCAGTTCG	20	3	G3T	#N/A	#N/A	#N/A	#N/A	#N/A	#N/A
M17296	SNP	AGCGAAAGATCGCGAGGAAG	20	3	A3C	3.88969	-1.90898	0.614045	-1.16809	-1.02087	-0.720017
M17297	SNP	AGGGAAAGATCGCGAGGAAG	20	3	A3G	0.8151	0.805317	-0.623106	-0.423771	2.15643	0.752726
M17298	SNP	AGTGAAAGATCGCGAGGAAG	20	3	A3T	0.784755	0.627079	2.41779	0.898122	2.16057	2.09848
M17356	SNP	GTCGGGAGCGTCAACGCTTA	20	3	A3C	-0.64741	-2.529	-2.4081	1.49874	-0.0259206	0.0148571
M17357	SNP	GTGGGGAGCGTCAACGCTTA	20	3	A3G	-0.117972	0.557551	-0.296025	1.80449	1.64259	2.02373
M17358	SNP	GTTGGGAGCGTCAACGCTTA	20	3	A3T	-5.47213	-0.74849	-0.093205	-2.96255	-4.78363	-4.14004
M17620	SNP	ACATTACGTACGCGCCAGTT	20	3	T3A	-0.0326609	-2.03043	0.052748	3.67487	-0.450873	0.600744
M17621	SNP	ACCTTACGTACGCGCCAGTT	20	3	T3C	-5.59868	-3.92964	-3.93352	-4.63508	-3.72231	-3.79426
M17622	SNP	ACGTTACGTACGCGCCAGTT	20	3	T3G	-4.95073	-5.05537	-0.371417	1.7299	-0.037921	-1.70014
M17680	SNP	GACGAGATTGTCAACAGGTT	20	3	A3C	1.23929	0.824651	1.68985	0.868225	1.7603	1.15513
M17681	SNP	GAGGAGATTGTCAACAGGTT	20	3	A3G	0.537729	1.12721	2.13973	2.54477	2.194	2.54101
M17682	SNP	GATGAGATTGTCAACAGGTT	20	3	A3T	0.107049	1.06493	0.624157	0.515668	0.741074	0.00458574
M17935	SNP	CAATATGGAACCACGCTATG	20	3	G3A	-3.0186	2.35834	0.951009	-1.29696	3.40573	-2.28089
M17936	SNP	CACTATGGAACCACGCTATG	20	3	G3C	0.234989	-2.92988	2.80676	-1.73416	-0.680972	2.62165
M17937	SNP	CATTATGGAACCACGCTATG	20	3	G3T	1.25322	3.34044	0.673201	0.598896	-0.589045	-3.04023
M15172	SNP	AGTCTGGAACCACGCTATGT	20	4	A4C	0.370502	5.24773	2.91417	0.471964	0.32596	2.30387
M15173	SNP	AGTGTGGAACCACGCTATGT	20	4	A4G	-2.86567	-1.85682	-3.45941	0.542161	-3.52042	-2.959
M15174	SNP	AGTTTGGAACCACGCTATGT	20	4	A4T	-0.169538	2.19768	2.60765	0.408632	0.328117	3.97841
M15424	SNP	CCTACCGGCCACGTGTTTTG	20	4	G4A	0.251249	-2.53837	-0.60965	1.70329	-0.188285	1.96643
M15425	SNP	CCTCCCGGCCACGTGTTTTG	20	4	G4C	0.895166	-0.0164262	0.108688	1.15237	0.453134	1.49494
M15426	SNP	CCTTCCGGCCACGTGTTTTG	20	4	G4T	0.010279	1.03588	0.642943	0.303422	0.544511	0.0286118
M16078	SNP	ATGACGGAGTTTGCTGCGAT	20	4	C4A	-0.973192	1.71474	2.57327	1.5135	0.327862	-2.25583
M16079	SNP	ATGGCGGAGTTTGCTGCGAT	20	4	C4G	-0.679508	-0.919862	1.46976	-0.330108	1.59703	-0.827703
M16080	SNP	ATGTCGGAGTTTGCTGCGAT	20	4	C4T	-1.51949	0.742808	3.78252	2.83346	-0.447406	-1.14744
M16393	SNP	CGGCTTGTACCCCTCGATGC	20	4	A4C	-0.234709	-0.783171	0.529881	-1.86048	-0.0631359	-1.00904
M16394	SNP	CGGGTTGTACCCCTCGATGC	20	4	A4G	2.51192	-1.36375	2.44539	2.1647	1.5301	-2.20506
M16395	SNP	CGGTTTGTACCCCTCGATGC	20	4	A4T	1.94826	3.00085	-1.27868	2.92434	0.0664114	-0.867659
M16267	SNP	CCGGAGTTAGCCACTCCGAAG	21	5	C5A	#N/A	#N/A	#N/A	#N/A	#N/A	#N/A
M16268	SNP	CCGGGGTTAGCCACTCCGAAG	21	5	C5G	4.57513	-5.57001	-4.93723	-1.0764	-2.50701	-3.29341
M16269	SNP	CCGGTGTTAGCCACTCCGAAG	21	5	C5T	-2.92173	-7.38511	-4.13275	-4.13345	-4.02155	-4.66801
M16720	SNP	ACCACCGGATTTGAGCCGGCG	21	5	A5C	0.707275	3.44621	-4.75363	2.831	-2.94446	1.36976
M16721	SNP	ACCAGCGGATTTGAGCCGGCG	21	5	A5G	3.23303	1.6131	1.10356	3.7926	4.57265	2.3139
M16722	SNP	ACCATCGGATTTGAGCCGGCG	21	5	A5T	0.990892	-0.736264	1.54208	-0.868908	0.979025	-0.25001
M17173	SNP	GCTTACAGTAGCGACAGAAGC	21	5	C5A	3.86553	-3.25398	-4.28755	-0.461668	1.76392	3.89245
M17174	SNP	GCTTGCAGTAGCGACAGAAGC	21	5	C5G	#N/A	#N/A	#N/A	#N/A	#N/A	#N/A
M17175	SNP	GCTTTCAGTAGCGACAGAAGC	21	5	C5T	#N/A	#N/A	#N/A	#N/A	#N/A	#N/A
M17815	SNP	CAGGATCCTTACAGGCAGCCC	21	5	C5A	1.15716	-4.25816	1.11471	-0.203645	2.22082	-0.240567
M17816	SNP	CAGGGTCCTTACAGGCAGCCC	21	5	C5G	0.674563	1.07998	0.634638	-3.72513	-5.1571	-0.495498
M17817	SNP	CAGGTTCCTTACAGGCAGCCC	21	5	C5T	-2.24902	1.00854	-6.79056	-2.393	-3.16603	-0.409459
M17878	SNP	TTGAACAGGACCCCGAAAGGG	21	5	G5A	3.83432	2.43436	1.25402	3.67512	2.9718	0.170015
M17879	SNP	TTGACCAGGACCCCGAAAGGG	21	5	G5C	3.24923	0.568783	0.429773	1.45287	2.70912	1.81426
M17880	SNP	TTGATCAGGACCCCGAAAGGG	21	5	G5T	1.72798	0.972118	3.54251	2.32696	-1.30642	1.05308
M18001	SNP	GAAGCGATTGTCAACAGGTTT	21	5	A5C	-0.458135	1.42877	-0.239659	-1.43248	0.0373211	0.297077
M18002	SNP	GAAGGGATTGTCAACAGGTTT	21	5	A5G	0.221017	1.1105	2.24993	0.66131	-2.61665	1.35911
M18003	SNP	GAAGTGATTGTCAACAGGTTT	21	5	A5T	0.283027	-0.732357	1.77262	2.22918	2.00294	2.84383
M18064	SNP	TAGCAATGGTAGCGTCTCGCT	21	5	C5A	2.4462	-1.56591	0.287514	2.63607	-0.143647	0.992874
M18065	SNP	TAGCGATGGTAGCGTCTCGCT	21	5	C5G	-6.33365	-2.19222	-5.51014	-4.56564	-5.61062	-5.12379
M18066	SNP	TAGCTATGGTAGCGTCTCGCT	21	5	C5T	0.561439	-4.54607	-0.408021	-0.0967762	-3.9281	-2.10027
M15115	SNP	TTAGAACTGATCCATTCAGCG	21	6	G6A	-1.36937	-1.54287	-2.61249	-1.58452	-1.33437	-1.35635
M15116	SNP	TTAGACCTGATCCATTCAGCG	21	6	G6C	0.595458	-2.67301	-2.85287	-1.95029	-1.47232	6.28129
M15117	SNP	TTAGATCTGATCCATTCAGCG	21	6	G6T	-0.662848	-0.794685	2.78456	-1.07125	0.277479	5.29453
M15304	SNP	GCTAAAGCATCTAAGGTATGG	21	6	C6A	2.93925	2.1769	0.209346	1.62924	1.64301	-0.219078
M15305	SNP	GCTAAGGCATCTAAGGTATGG	21	6	C6G	2.08537	1.52361	1.03123	4.15507	2.19025	0.16355
M15306	SNP	GCTAATGCATCTAAGGTATGG	21	6	C6T	2.83148	1.00988	1.53695	1.21846	1.96036	2.66327
M15367	SNP	ACGGTAGCTTGTTCAGCGAAC	21	6	T6A	-1.44755	-5.77247	-2.28185	-1.18331	-6.52783	-3.78626
M15368	SNP	ACGGTCGCTTGTTCAGCGAAC	21	6	T6C	#N/A	#N/A	#N/A	#N/A	#N/A	#N/A
M15369	SNP	ACGGTGGCTTGTTCAGCGAAC	21	6	T6G	#N/A	#N/A	#N/A	#N/A	#N/A	#N/A
M15490	SNP	CGTCGAGAGTTGTGAGGCTGT	21	6	C6A	0.115783	-0.376406	-1.69716	0.223358	1.65788	0.00179855
M15491	SNP	CGTCGGGAGTTGTGAGGCTGT	21	6	C6G	-1.60109	-1.06878	-0.189678	0.837133	0.0449722	0.745081
M15492	SNP	CGTCGTGAGTTGTGAGGCTGT	21	6	C6T	0.0194355	0.298057	0.740948	-0.0520644	0.736594	0.338455
M15751	SNP	CTCGCAAAAGAGCCCGGACAC	21	6	G6A	-1.59132	-2.8703	-1.78654	0.214905	-2.54828	-0.412009
M15752	SNP	CTCGCCAAAGAGCCCGGACAC	21	6	G6C	-0.784337	0.655474	1.10105	-2.89229	0.820733	-1.45729
M15753	SNP	CTCGCTAAAGAGCCCGGACAC	21	6	G6T	-0.148304	-1.87025	4.54025	-3.47171	0.984362	-2.63156
M16144	SNP	GAGGGCGAAGCCGAAACCGGC	21	6	A6C	-0.842841	1.07947	0.0451526	0.479604	1.19926	-0.520413
M16145	SNP	GAGGGGGAAGCCGAAACCGGC	21	6	A6G	0.645072	2.28456	1.59674	4.48126	2.31148	-0.281299
M16146	SNP	GAGGGTGAAGCCGAAACCGGC	21	6	A6T	-0.688618	3.43897	-1.6995	0.590254	-0.959367	-3.02256
M16207	SNP	CCACGATAAAAGTGCGCGCCG	21	6	G6A	-0.817603	-1.60838	-0.16863	-2.77031	-1.98869	-1.10559
M16208	SNP	CCACGCTAAAAGTGCGCGCCG	21	6	G6C	-1.89192	-0.832844	-2.55855	-0.910522	-2.92665	0.0803495
M16209	SNP	CCACGTTAAAAGTGCGCGCCG	21	6	G6T	-2.60281	-0.695457	-3.65847	-0.317322	-0.624458	-2.18753
M16270	SNP	CCGGCATTAGCCACTCCGAAG	21	6	G6A	1.01265	-0.30162	2.43511	1.48027	0.650393	1.04286
M16271	SNP	CCGGCCTTAGCCACTCCGAAG	21	6	G6C	1.22963	0.48089	0.581646	1.16141	0.663528	1.93071
M16272	SNP	CCGGCTTTAGCCACTCCGAAG	21	6	G6T	1.36444	2.83223	-0.0562261	0.671112	2.31748	1.4744
M16723	SNP	ACCAAAGGATTTGAGCCGGCG	21	6	C6A	-2.51495	-3.37485	-4.63782	0.473343	-1.80666	-3.53932
M16724	SNP	ACCAAGGGATTTGAGCCGGCG	21	6	C6G	0.275248	0.940148	2.20092	1.47831	1.6474	1.47181
M16725	SNP	ACCAATGGATTTGAGCCGGCG	21	6	C6T	-2.6174	2.26697	-0.408202	-1.29229	-2.12408	0.8404
M17176	SNP	GCTTCAAGTAGCGACAGAAGC	21	6	C6A	-5.06614	2.45032	2.06298	2.1603	-1.63905	2.64892
M17177	SNP	GCTTCGAGTAGCGACAGAAGC	21	6	C6G	-3.07549	-1.32456	-5.42674	-5.89491	-4.49695	6.04408
M17178	SNP	GCTTCTAGTAGCGACAGAAGC	21	6	C6T	#N/A	#N/A	#N/A	#N/A	#N/A	#N/A
M17818	SNP	CAGGCACCTTACAGGCAGCCC	21	6	T6A	-4.03782	-5.08156	-2.81724	-4.33941	-4.89039	-4.16114
M17819	SNP	CAGGCCCCTTACAGGCAGCCC	21	6	T6C	#N/A	#N/A	#N/A	#N/A	#N/A	#N/A
M17820	SNP	CAGGCGCCTTACAGGCAGCCC	21	6	T6G	#N/A	#N/A	#N/A	#N/A	#N/A	#N/A
M17881	SNP	TTGAGAAGGACCCCGAAAGGG	21	6	C6A	2.62918	2.52887	2.11948	2.71953	0.381266	1.94642
M17882	SNP	TTGAGGAGGACCCCGAAAGGG	21	6	C6G	0.98497	4.27421	1.41799	1.91073	1.58004	2.00681
M17883	SNP	TTGAGTAGGACCCCGAAAGGG	21	6	C6T	2.69039	1.12835	3.69018	3.49333	0.488792	2.82139
M18004	SNP	GAAGAAATTGTCAACAGGTTT	21	6	G6A	1.49093	-0.162676	2.26329	-0.963712	2.87677	1.33002
M18005	SNP	GAAGACATTGTCAACAGGTTT	21	6	G6C	-1.50176	-0.953789	2.78658	0.166276	-0.0860171	1.45334
M18006	SNP	GAAGATATTGTCAACAGGTTT	21	6	G6T	0.162169	0.357354	0.340474	1.81525	3.03655	0.77836
M18067	SNP	TAGCCCTGGTAGCGTCTCGCT	21	6	A6C	2.43199	-3.52149	3.14906	1.78461	1.97563	-3.07742
M18068	SNP	TAGCCGTGGTAGCGTCTCGCT	21	6	A6G	-1.14368	-0.514869	-1.95405	-2.47222	-0.797132	-3.23508
M18069	SNP	TAGCCTTGGTAGCGTCTCGCT	21	6	A6T	-0.01035	-0.536093	0.856015	2.242	-0.884894	1.20891
M16783	SNP	AAGCATGTGAACGCGAGTTAGA	22	5	C5A	-0.0423047	-0.172232	-0.812225	0.464833	-0.650592	-2.11146
M16784	SNP	AAGCGTGTGAACGCGAGTTAGA	22	5	C5G	-2.0034	1.65654	-0.942457	1.51834	2.41173	1.22233
M16785	SNP	AAGCTTGTGAACGCGAGTTAGA	22	5	C5T	-4.722	0.84027	-0.517588	1.3433	1.99059	1.6794
M17107	SNP	GTGGAAGAAAACTCCACACCAG	22	5	G5A	#N/A	#N/A	#N/A	#N/A	#N/A	#N/A
M17108	SNP	GTGGCAGAAAACTCCACACCAG	22	5	G5C	0.485846	-1.19735	0.0416439	-3.08731	-3.64069	0.353653
M17109	SNP	GTGGTAGAAAACTCCACACCAG	22	5	G5T	#N/A	#N/A	#N/A	#N/A	#N/A	#N/A
M17236	SNP	AACAATCTGGGTTGCCACTTTA	22	5	G5A	#N/A	#N/A	#N/A	#N/A	#N/A	#N/A
M17237	SNP	AACACTCTGGGTTGCCACTTTA	22	5	G5C	0.193311	-5.07956	-1.55928	0.876942	1.8871	-0.887352
M17238	SNP	AACATTCTGGGTTGCCACTTTA	22	5	G5T	0.192903	4.21652	-1.2947	0.361036	-0.667086	3.50903
M17422	SNP	GTAAAGGTTGCTTGTTCAGCGA	22	5	C5A	-1.09052	-2.37271	1.96852	0.437173	-0.609954	1.39697
M17423	SNP	GTAAGGGTTGCTTGTTCAGCGA	22	5	C5G	-0.371595	-0.122592	0.293507	-0.998183	0.45394	-0.636156
M17424	SNP	GTAATGGTTGCTTGTTCAGCGA	22	5	C5T	-3.2062	1.9963	-3.33689	1.88343	-4.72396	-2.40071
M14983	SNP	CTCATCGGAAGAAACTCTTGAA	22	6	A6C	2.83383	4.07287	-1.91912	-4.71173	-3.9963	1.46933
M14984	SNP	CTCATGGGAAGAAACTCTTGAA	22	6	A6G	1.66327	-1.57194	2.59818	-1.11767	-5.66201	1.39077
M14985	SNP	CTCATTGGAAGAAACTCTTGAA	22	6	A6T	-1.22652	3.19748	-0.125128	0.825184	0.755434	2.75012
M15049	SNP	AGCAAAACGGAAACCCGAGGTA	22	6	G6A	0.352196	1.77314	1.42539	2.2232	-1.73003	0.788204
M15050	SNP	AGCAACACGGAAACCCGAGGTA	22	6	G6C	-0.0805077	-0.589529	-0.560315	2.70739	0.96615	-1.88317
M15051	SNP	AGCAATACGGAAACCCGAGGTA	22	6	G6T	1.76612	-0.523953	-0.446296	2.06833	-0.246921	-1.09068
M15238	SNP	ACGGAAGCTGGTTTGTAAAACA	22	6	T6A	-0.359728	-1.82035	0.224263	2.33444	2.46271	-0.0360745
M15239	SNP	ACGGACGCTGGTTTGTAAAACA	22	6	T6C	-0.939181	-0.425001	-2.99799	0.850877	-2.17574	-1.23557
M15240	SNP	ACGGAGGCTGGTTTGTAAAACA	22	6	T6G	3.41874	-0.543091	-3.77603	-0.704303	-3.33561	-0.160424
M15553	SNP	ATCTACCTTGATGTTAGTACCG	22	6	A6C	-1.62227	2.71279	-0.216038	4.08013	-2.89706	2.51443
M15554	SNP	ATCTAGCTTGATGTTAGTACCG	22	6	A6G	1.04716	0.813328	-2.79891	-2.23592	-1.2813	-2.72754
M15555	SNP	ATCTATCTTGATGTTAGTACCG	22	6	A6T	1.52364	-0.292212	0.613014	3.78395	3.99153	2.29808
M15619	SNP	ACGTAAGGCTCTCATAGGAAGA	22	6	C6A	-1.32445	0.173123	-0.501402	5.15631	-0.437593	1.68429
M15620	SNP	ACGTAGGGCTCTCATAGGAAGA	22	6	C6G	-4.03782	0.122274	-0.511942	-3.07422	-2.98769	-3.84434
M15621	SNP	ACGTATGGCTCTCATAGGAAGA	22	6	C6T	-3.19683	-1.52037	-0.154754	-2.18463	-1.05032	-2.95319
M15685	SNP	GGCTGAAGCAGGAGCGTGCGTC	22	6	T6A	-4.77182	-6.04822	-2.63028	-4.51665	-2.98522	-2.1359
M15686	SNP	GGCTGCAGCAGGAGCGTGCGTC	22	6	T6C	-2.37213	-3.36611	-4.2997	-0.741191	-2.16403	0.660841
M15687	SNP	GGCTGGAGCAGGAGCGTGCGTC	22	6	T6G	-3.27237	-1.54764	-0.587113	-0.00273762	0.251548	0.482227
M15883	SNP	TGCGAATGCTGAGGGAATCGGG	22	6	T6A	-1.02924	-0.417311	-2.92262	-3.08416	2.45927	2.79158
M15884	SNP	TGCGACTGCTGAGGGAATCGGG	22	6	T6C	-3.67167	-2.41117	-3.82023	-3.20998	-0.950941	-3.41748
M15885	SNP	TGCGAGTGCTGAGGGAATCGGG	22	6	T6G	0.54579	-1.42227	0.228317	-1.64865	1.32129	1.04458
M15949	SNP	ATGAACGCACCGACCCCTTTCT	22	6	A6C	-0.577901	1.53495	-1.07542	2.34258	-0.0622989	-0.960396
M15950	SNP	ATGAAGGCACCGACCCCTTTCT	22	6	A6G	0.795919	-0.282306	-1.07019	-0.443378	0.869917	-0.484055
M15951	SNP	ATGAATGCACCGACCCCTTTCT	22	6	A6T	2.16329	1.18792	1.04111	0.318413	1.69143	-3.38628
M16333	SNP	AGCGAAGTCCGTCCCACCGAAG	22	6	G6A	0.292167	0.185612	0.744048	-0.390927	-1.28812	-0.734555
M16334	SNP	AGCGACGTCCGTCCCACCGAAG	22	6	G6C	1.7006	-0.89532	0.0952632	1.56137	-3.11415	-4.87657
M16335	SNP	AGCGATGTCCGTCCCACCGAAG	22	6	G6T	-2.16093	-2.29618	-0.922927	-1.34316	-4.13683	-3.71957
M16657	SNP	GCGGAACACCGCTTCCAGTAGC	22	6	T6A	#N/A	#N/A	#N/A	#N/A	#N/A	#N/A
M16658	SNP	GCGGACCACCGCTTCCAGTAGC	22	6	T6C	1.81899	-1.90471	1.72225	0.963806	0.447017	2.53027
M16659	SNP	GCGGAGCACCGCTTCCAGTAGC	22	6	T6G	-0.285786	1.63247	1.21427	-1.3259	-3.73302	1.57382
M16786	SNP	AAGCCAGTGAACGCGAGTTAGA	22	6	T6A	0.227291	-2.41792	-1.23521	0.887886	0.645505	-2.5247
M16787	SNP	AAGCCCGTGAACGCGAGTTAGA	22	6	T6C	1.15043	-1.19879	-2.72915	-0.819219	-1.22524	0.499156
M16788	SNP	AAGCCGGTGAACGCGAGTTAGA	22	6	T6G	-0.413628	1.01458	0.991834	-3.46654	-0.595876	-5.39241
M17110	SNP	GTGGGCGAAAACTCCACACCAG	22	6	A6C	-2.50133	-1.60637	-1.60931	0.561582	-2.72251	0.224054
M17111	SNP	GTGGGGGAAAACTCCACACCAG	22	6	A6G	#N/A	#N/A	#N/A	#N/A	#N/A	#N/A
M17112	SNP	GTGGGTGAAAACTCCACACCAG	22	6	A6T	-4.36356	-4.01331	-7.44066	1.29959	-3.82214	4.64135
M17239	SNP	AACAGACTGGGTTGCCACTTTA	22	6	T6A	#N/A	#N/A	#N/A	#N/A	#N/A	#N/A
M17240	SNP	AACAGCCTGGGTTGCCACTTTA	22	6	T6C	-2.50215	-1.09953	-1.79423	-1.8369	-0.503842	0.129343
M17241	SNP	AACAGGCTGGGTTGCCACTTTA	22	6	T6G	-1.89751	-1.80446	1.8608	-1.4704	-1.0187	-0.230705
M17425	SNP	GTAACAGTTGCTTGTTCAGCGA	22	6	G6A	-2.06735	-2.29427	-5.43723	-4.80812	-0.890449	5.34776
M17426	SNP	GTAACCGTTGCTTGTTCAGCGA	22	6	G6C	1.90493	2.07864	-1.83765	-3.58332	1.21128	-2.63036
M17427	SNP	GTAACTGTTGCTTGTTCAGCGA	22	6	G6T	-2.28619	-3.32173	-1.22633	-2.02292	-2.38568	-3.73115
M14986	SNP	CTCATAAGAAGAAACTCTTGAA	22	7	G7A	-4.97617	-3.55004	1.05396	0.885084	-0.992153	-5.07778
M14987	SNP	CTCATACGAAGAAACTCTTGAA	22	7	G7C	-2.21365	2.29073	-4.62459	-3.89778	2.99532	0.757464
M14988	SNP	CTCATATGAAGAAACTCTTGAA	22	7	G7T	0.371181	-2.9494	0.935025	-0.4285	0.362713	-0.361333
M15052	SNP	AGCAAGCCGGAAACCCGAGGTA	22	7	A7C	0.82059	0.736991	0.86007	1.03586	0.992872	2.21993
M15053	SNP	AGCAAGGCGGAAACCCGAGGTA	22	7	A7G	1.89778	-2.34814	-0.31644	1.42942	-2.13555	0.816372
M15054	SNP	AGCAAGTCGGAAACCCGAGGTA	22	7	A7T	0.299921	0.0855355	1.37625	-0.436033	-1.88412	4.50108
M15241	SNP	ACGGATACTGGTTTGTAAAACA	22	7	G7A	2.33509	-1.71975	-0.974635	-1.62127	-0.0772436	0.519391
M15242	SNP	ACGGATCCTGGTTTGTAAAACA	22	7	G7C	1.22561	1.47078	-3.60653	-0.220045	1.5749	0.105966
M15243	SNP	ACGGATTCTGGTTTGTAAAACA	22	7	G7T	0.187825	-0.21749	-0.651775	2.55934	0.123082	-0.718852
M15556	SNP	ATCTAAATTGATGTTAGTACCG	22	7	C7A	1.16672	-0.0946245	1.47384	1.73441	3.42709	1.26557
M15557	SNP	ATCTAAGTTGATGTTAGTACCG	22	7	C7G	-1.82749	2.78683	-2.62816	-0.841405	-3.67826	0.845568
M15558	SNP	ATCTAATTTGATGTTAGTACCG	22	7	C7T	-0.398989	-3.84568	-2.22455	-2.74504	-3.64403	0.195328
M15622	SNP	ACGTACAGCTCTCATAGGAAGA	22	7	G7A	2.57315	-0.415831	3.35345	0.908304	-0.240805	2.80366
M15623	SNP	ACGTACCGCTCTCATAGGAAGA	22	7	G7C	2.37301	1.95593	1.78287	-0.314892	-0.752564	1.06751
M15624	SNP	ACGTACTGCTCTCATAGGAAGA	22	7	G7T	2.08778	-0.634225	-1.49247	-0.0787165	-4.09334	-5.81656
M15688	SNP	GGCTGTCGCAGGAGCGTGCGTC	22	7	A7C	-1.09175	0.259598	-3.50306	-3.54588	-1.7587	-1.01811
M15689	SNP	GGCTGTGGCAGGAGCGTGCGTC	22	7	A7G	1.74128	-2.34207	2.00412	0.389098	0.682914	-0.00208679
M15690	SNP	GGCTGTTGCAGGAGCGTGCGTC	22	7	A7T	-4.91173	-3.78662	-4.71996	-3.51349	-3.76624	-4.32884
M15886	SNP	TGCGATAGCTGAGGGAATCGGG	22	7	T7A	-0.270676	-2.9354	0.474963	0.426992	0.529926	-3.66586
M15887	SNP	TGCGATCGCTGAGGGAATCGGG	22	7	T7C	-0.786268	-3.19931	-1.37127	-2.67716	-1.06172	-0.297494
M15888	SNP	TGCGATGGCTGAGGGAATCGGG	22	7	T7G	-2.4704	2.99558	-0.279997	-4.21659	-5.45163	-5.4625
M15952	SNP	ATGAAAACACCGACCCCTTTCT	22	7	G7A	-0.45541	1.83329	0.835388	1.91638	0.8871	2.21866
M15953	SNP	ATGAAACCACCGACCCCTTTCT	22	7	G7C	-0.174007	0.0582388	1.37509	0.802618	1.48067	1.6883
M15954	SNP	ATGAAATCACCGACCCCTTTCT	22	7	G7T	0.536402	2.98111	1.27641	2.73782	0.0525534	-1.96625
M16336	SNP	AGCGAGATCCGTCCCACCGAAG	22	7	G7A	-1.52575	-0.294243	0.936856	-3.06522	1.3039	-4.95042
M16337	SNP	AGCGAGCTCCGTCCCACCGAAG	22	7	G7C	-0.636718	-0.664746	-2.03525	1.99108	2.84792	-1.09011
M16338	SNP	AGCGAGTTCCGTCCCACCGAAG	22	7	G7T	-0.218398	-0.219846	0.747655	0.413012	1.64414	0.845619
M16660	SNP	GCGGATAACCGCTTCCAGTAGC	22	7	C7A	2.73925	2.01419	-4.04112	1.9965	-3.64545	-2.67349
M16661	SNP	GCGGATGACCGCTTCCAGTAGC	22	7	C7G	-3.43873	-0.837695	-0.891701	-4.05718	4.35405	-1.94587
M16662	SNP	GCGGATTACCGCTTCCAGTAGC	22	7	C7T	0.232131	-6.40295	-1.40517	2.78628	0.763563	1.51991
M16789	SNP	AAGCCTATGAACGCGAGTTAGA	22	7	G7A	-2.18295	-1.08963	-3.28144	1.18796	-2.05813	-2.71562
M16790	SNP	AAGCCTCTGAACGCGAGTTAGA	22	7	G7C	-4.39937	-0.315612	-3.81511	-1.97536	-2.50391	-3.41908
M16791	SNP	AAGCCTTTGAACGCGAGTTAGA	22	7	G7T	1.91815	1.12274	-2.46288	1.0059	4.62702	-1.83834
M17113	SNP	GTGGGAAAAAACTCCACACCAG	22	7	G7A	#N/A	#N/A	#N/A	#N/A	#N/A	#N/A
M17114	SNP	GTGGGACAAAACTCCACACCAG	22	7	G7C	-3.19586	-5.15124	-5.34055	0.447917	3.58286	-0.576509
M17115	SNP	GTGGGATAAAACTCCACACCAG	22	7	G7T	#N/A	#N/A	#N/A	#N/A	#N/A	#N/A
M17242	SNP	AACAGTATGGGTTGCCACTTTA	22	7	C7A	-0.359299	0.68058	-2.08974	0.572285	1.56378	0.670965
M17243	SNP	AACAGTGTGGGTTGCCACTTTA	22	7	C7G	#N/A	#N/A	#N/A	#N/A	#N/A	#N/A
M17244	SNP	AACAGTTTGGGTTGCCACTTTA	22	7	C7T	-1.13927	0.104001	5.16407	2.73802	0.151053	-1.07618
M17428	SNP	GTAACGATTGCTTGTTCAGCGA	22	7	G7A	-0.653673	-3.94812	-2.39603	-4.73504	-4.21497	2.38283
M17429	SNP	GTAACGCTTGCTTGTTCAGCGA	22	7	G7C	-6.17908	-2.57223	-0.99058	-4.55195	-4.91912	-2.91485
M17430	SNP	GTAACGTTTGCTTGTTCAGCGA	22	7	G7T	-4.43499	-0.0625243	-6.02706	1.02301	-2.88887	-3.27653
M14989	SNP	CTCATAGAAAGAAACTCTTGAA	22	8	G8A	-3.09369	1.46161	5.65096	-1.85162	5.55939	-4.00207
M14990	SNP	CTCATAGCAAGAAACTCTTGAA	22	8	G8C	#N/A	#N/A	#N/A	#N/A	#N/A	#N/A
M14991	SNP	CTCATAGTAAGAAACTCTTGAA	22	8	G8T	3.95559	1.44771	2.43889	3.39304	4.69047	2.3275
M15055	SNP	AGCAAGAAGGAAACCCGAGGTA	22	8	C8A	1.34732	1.25761	2.7966	1.39921	3.59953	0.600675
M15056	SNP	AGCAAGAGGGAAACCCGAGGTA	22	8	C8G	-3.75032	2.99098	-4.64037	-1.46483	4.1961	-4.29065
M15057	SNP	AGCAAGATGGAAACCCGAGGTA	22	8	C8T	2.60096	2.30025	-0.512449	1.20899	1.12938	1.42388
M15244	SNP	ACGGATGATGGTTTGTAAAACA	22	8	C8A	0.0440878	-0.0637122	2.06296	-1.54045	0.855335	-0.877146
M15245	SNP	ACGGATGGTGGTTTGTAAAACA	22	8	C8G	1.16481	1.39099	0.17393	-0.189829	-0.793581	0.135261
M15246	SNP	ACGGATGTTGGTTTGTAAAACA	22	8	C8T	#N/A	#N/A	#N/A	#N/A	#N/A	#N/A
M15559	SNP	ATCTAACATGATGTTAGTACCG	22	8	T8A	#N/A	#N/A	#N/A	#N/A	#N/A	#N/A
M15560	SNP	ATCTAACCTGATGTTAGTACCG	22	8	T8C	-2.59044	-6.29804	-3.71576	-6.30387	-2.93448	-6.44895
M15561	SNP	ATCTAACGTGATGTTAGTACCG	22	8	T8G	#N/A	#N/A	#N/A	#N/A	#N/A	#N/A
M15625	SNP	ACGTACGACTCTCATAGGAAGA	22	8	G8A	0.936667	-0.0174268	0.869544	-0.184441	1.97119	0.815223
M15626	SNP	ACGTACGCCTCTCATAGGAAGA	22	8	G8C	-0.0113862	1.9123	0.981947	2.8005	0.570772	1.09771
M15627	SNP	ACGTACGTCTCTCATAGGAAGA	22	8	G8T	-4.44502	-3.92002	-4.02368	-1.11373	-2.75568	-5.49906
M15691	SNP	GGCTGTAACAGGAGCGTGCGTC	22	8	G8A	-2.78673	-0.474241	-1.41336	-1.08756	-2.83855	-3.64373
M15692	SNP	GGCTGTACCAGGAGCGTGCGTC	22	8	G8C	-0.628863	1.90252	-0.221491	1.64858	-3.69953	-1.71966
M15693	SNP	GGCTGTATCAGGAGCGTGCGTC	22	8	G8T	-1.38267	0.746953	-0.0773238	-0.53909	-1.35597	-0.518709
M15889	SNP	TGCGATTACTGAGGGAATCGGG	22	8	G8A	#N/A	#N/A	#N/A	#N/A	#N/A	#N/A
M15890	SNP	TGCGATTCCTGAGGGAATCGGG	22	8	G8C	2.77525	-5.04119	2.63349	2.73051	0.468648	3.56407
M15891	SNP	TGCGATTTCTGAGGGAATCGGG	22	8	G8T	-3.76164	-8.37142	-3.7992	-3.50646	-2.80266	0.0711518
M15955	SNP	ATGAAAGAACCGACCCCTTTCT	22	8	C8A	0.659872	3.24666	-0.337461	-0.784452	-0.594894	0.793446
M15956	SNP	ATGAAAGGACCGACCCCTTTCT	22	8	C8G	1.04242	-5.07133	0.389967	-4.27363	-3.3918	-0.901102
M15957	SNP	ATGAAAGTACCGACCCCTTTCT	22	8	C8T	1.7899	-2.28699	1.56775	2.45076	-2.16429	-0.393583
M16339	SNP	AGCGAGGACCGTCCCACCGAAG	22	8	T8A	-0.144138	-1.54048	1.0042	-2.14603	1.84144	1.75867
M16340	SNP	AGCGAGGCCCGTCCCACCGAAG	22	8	T8C	1.45389	-2.33785	-2.08305	-1.98735	-0.685359	1.33756
M16341	SNP	AGCGAGGGCCGTCCCACCGAAG	22	8	T8G	-0.897739	0.559769	0.137872	2.48535	0.150878	-0.815562
M16663	SNP	GCGGATCCCCGCTTCCAGTAGC	22	8	A8C	2.119	1.18265	0.218342	0.61609	1.59218	2.29502
M16664	SNP	GCGGATCGCCGCTTCCAGTAGC	22	8	A8G	-1.29198	-1.12591	0.60166	2.87659	-1.26971	1.17701
M16665	SNP	GCGGATCTCCGCTTCCAGTAGC	22	8	A8T	-1.96268	-7.26025	-0.316196	-3.0489	0.918452	-3.41468
M16792	SNP	AAGCCTGAGAACGCGAGTTAGA	22	8	T8A	-1.67684	2.46072	2.85706	-3.94712	-4.05843	-0.901959
M16793	SNP	AAGCCTGCGAACGCGAGTTAGA	22	8	T8C	-4.72204	-4.76472	-1.68529	0.310126	1.56324	1.23147
M16794	SNP	AAGCCTGGGAACGCGAGTTAGA	22	8	T8G	-1.44447	1.8691	2.14715	1.56086	1.17601	-3.82928
M17116	SNP	GTGGGAGCAAACTCCACACCAG	22	8	A8C	#N/A	#N/A	#N/A	#N/A	#N/A	#N/A
M17117	SNP	GTGGGAGGAAACTCCACACCAG	22	8	A8G	-7.51066	-4.61624	-0.0242832	-4.46113	1.49588	0.586119
M17118	SNP	GTGGGAGTAAACTCCACACCAG	22	8	A8T	-3.07549	-5.53347	-1.11711	-5.89491	-2.16991	-6.24207
M17245	SNP	AACAGTCAGGGTTGCCACTTTA	22	8	T8A	-0.376251	0.115888	0.803245	-2.04188	-2.78371	0.437336
M17246	SNP	AACAGTCCGGGTTGCCACTTTA	22	8	T8C	-4.00164	-2.02078	-1.1778	-2.20729	1.77175	-8.14685
M17247	SNP	AACAGTCGGGGTTGCCACTTTA	22	8	T8G	-1.612	1.61569	1.51143	-1.92892	0.332362	2.87153
M17431	SNP	GTAACGGATGCTTGTTCAGCGA	22	8	T8A	2.10105	-4.10584	-0.106756	-5.18695	-4.53884	-1.04446
M17432	SNP	GTAACGGCTGCTTGTTCAGCGA	22	8	T8C	0.480486	-5.12964	-2.27432	-4.13893	-4.1513	-0.507152
M17433	SNP	GTAACGGGTGCTTGTTCAGCGA	22	8	T8G	-0.569499	-0.293802	-2.84597	-0.407141	1.45567	0.387109
M14992	SNP	CTCATAGGCAGAAACTCTTGAA	22	9	A9C	-3.54464	-1.58176	-3.6558	-0.943382	1.6865	-3.82911
M14993	SNP	CTCATAGGGAGAAACTCTTGAA	22	9	A9G	-2.97867	-2.42809	-2.75888	-2.72655	-2.22269	2.24497
M14994	SNP	CTCATAGGTAGAAACTCTTGAA	22	9	A9T	2.66209	-2.34297	1.29155	4.26383	1.89214	1.35367
M15058	SNP	AGCAAGACAGAAACCCGAGGTA	22	9	G9A	-1.44319	0.283125	0.468346	-3.37465	1.40162	1.27919
M15059	SNP	AGCAAGACCGAAACCCGAGGTA	22	9	G9C	0.140533	-0.406971	0.728146	-0.727112	-1.39101	-1.21711
M15060	SNP	AGCAAGACTGAAACCCGAGGTA	22	9	G9T	-3.01489	1.01828	-5.13626	-3.96192	-4.91315	-3.781
M15247	SNP	ACGGATGCAGGTTTGTAAAACA	22	9	T9A	-1.81453	-2.97173	-2.2341	-2.70827	-0.56015	-1.73369
M15248	SNP	ACGGATGCCGGTTTGTAAAACA	22	9	T9C	-0.778445	-0.475337	-1.5397	-1.89355	-5.83559	-2.41234
M15249	SNP	ACGGATGCGGGTTTGTAAAACA	22	9	T9G	1.07317	-2.1865	-1.77965	-0.862365	-1.78673	-1.78839
M15562	SNP	ATCTAACTAGATGTTAGTACCG	22	9	T9A	-0.914572	-2.88853	-1.35193	0.697997	2.03305	-4.76783
M15563	SNP	ATCTAACTCGATGTTAGTACCG	22	9	T9C	-3.5265	-7.28885	-1.55865	-2.01508	-1.72009	2.29531
M15564	SNP	ATCTAACTGGATGTTAGTACCG	22	9	T9G	-5.84684	-5.59917	-2.7698	-2.79731	-5.59917	-0.950911
M15628	SNP	ACGTACGGATCTCATAGGAAGA	22	9	C9A	0.223298	2.04053	-2.80478	-0.0440556	0.39456	1.39511
M15629	SNP	ACGTACGGGTCTCATAGGAAGA	22	9	C9G	0.684246	2.08558	0.200352	0.0973954	-1.07143	0.774976
M15630	SNP	ACGTACGGTTCTCATAGGAAGA	22	9	C9T	1.87339	1.78124	2.84473	0.719321	2.56514	3.79225
M15694	SNP	GGCTGTAGAAGGAGCGTGCGTC	22	9	C9A	-2.65511	-2.13281	-1.1804	-0.327274	-1.30659	-1.11979
M15695	SNP	GGCTGTAGGAGGAGCGTGCGTC	22	9	C9G	0.546741	0.937003	0.744354	-0.227879	0.443966	-1.91476
M15696	SNP	GGCTGTAGTAGGAGCGTGCGTC	22	9	C9T	-2.91313	-0.944788	-4.13311	-1.13633	2.27553	2.23204
M15892	SNP	TGCGATTGATGAGGGAATCGGG	22	9	C9A	-3.21191	-2.31222	-1.29604	-1.57267	-0.34479	0.558147
M15893	SNP	TGCGATTGGTGAGGGAATCGGG	22	9	C9G	2.76685	-5.97167	-1.48945	-0.767725	-1.08692	2.13111
M15894	SNP	TGCGATTGTTGAGGGAATCGGG	22	9	C9T	-0.443638	1.94039	1.17111	-0.0351258	-3.56596	-3.88399
M15958	SNP	ATGAAAGCCCCGACCCCTTTCT	22	9	A9C	1.59723	1.31402	1.5871	2.89104	1.61023	-2.12958
M15959	SNP	ATGAAAGCGCCGACCCCTTTCT	22	9	A9G	-2.82247	-2.23994	-2.02934	-1.90189	1.44849	-4.92471
M15960	SNP	ATGAAAGCTCCGACCCCTTTCT	22	9	A9T	-3.23638	-3.75202	2.65603	5.38239	-3.28556	-1.63533
M16342	SNP	AGCGAGGTACGTCCCACCGAAG	22	9	C9A	-0.647684	-0.416332	-0.88062	-1.97606	-1.44927	0.518946
M16343	SNP	AGCGAGGTGCGTCCCACCGAAG	22	9	C9G	-2.44981	1.25731	0.992973	-1.40019	0.667992	1.5757
M16344	SNP	AGCGAGGTTCGTCCCACCGAAG	22	9	C9T	-2.06754	2.40314	-1.19313	-1.73203	-3.67648	-3.8161
M16666	SNP	GCGGATCAACGCTTCCAGTAGC	22	9	C9A	-3.31057	2.09791	3.27164	-0.683116	3.04297	2.16654
M16667	SNP	GCGGATCAGCGCTTCCAGTAGC	22	9	C9G	-1.05229	2.6549	1.21949	1.5186	-4.55583	-0.759181
M16668	SNP	GCGGATCATCGCTTCCAGTAGC	22	9	C9T	-1.80276	-1.29721	0.958734	0.829609	-2.05991	2.08592
M16795	SNP	AAGCCTGTAAACGCGAGTTAGA	22	9	G9A	0.221253	-4.3864	0.715892	-2.16253	0.280498	-1.10666
M16796	SNP	AAGCCTGTCAACGCGAGTTAGA	22	9	G9C	-0.598552	-3.82336	-3.05706	-4.34789	-5.82005	0.810435
M16797	SNP	AAGCCTGTTAACGCGAGTTAGA	22	9	G9T	-5.0283	-8.69811	0.563665	1.59894	-4.40639	0.845052
M17119	SNP	GTGGGAGACAACTCCACACCAG	22	9	A9C	-4.68904	-8.66013	-3.31155	-4.4428	-2.25695	-0.824415
M17120	SNP	GTGGGAGAGAACTCCACACCAG	22	9	A9G	#N/A	#N/A	#N/A	#N/A	#N/A	#N/A
M17121	SNP	GTGGGAGATAACTCCACACCAG	22	9	A9T	#N/A	#N/A	#N/A	#N/A	#N/A	#N/A
M17248	SNP	AACAGTCTAGGTTGCCACTTTA	22	9	G9A	4.37692	4.0866	-0.625406	-1.65117	4.63689	0.312142
M17249	SNP	AACAGTCTCGGTTGCCACTTTA	22	9	G9C	1.68302	-1.25285	0.548875	-0.969482	3.81119	0.674401
M17250	SNP	AACAGTCTTGGTTGCCACTTTA	22	9	G9T	-2.18901	-0.969437	0.70641	-1.09134	0.815599	-0.200954
M17434	SNP	GTAACGGTAGCTTGTTCAGCGA	22	9	T9A	1.08563	-1.955	-1.66926	0.13834	-1.42899	1.19117
M17435	SNP	GTAACGGTCGCTTGTTCAGCGA	22	9	T9C	-4.57809	0.892042	0.532675	-2.1752	-5.00016	-3.91344
M17436	SNP	GTAACGGTGGCTTGTTCAGCGA	22	9	T9G	-1.80744	-0.208797	-2.5839	-1.27263	0.179117	0.103508
M14995	SNP	CTCATAGGACGAAACTCTTGAA	22	10	A10C	-3.57889	0.523699	-0.891407	2.67287	-4.77252	-4.50335
M14996	SNP	CTCATAGGAGGAAACTCTTGAA	22	10	A10G	1.05944	1.15668	-0.895736	-1.26442	-4.5216	-5.74084
M14997	SNP	CTCATAGGATGAAACTCTTGAA	22	10	A10T	#N/A	#N/A	#N/A	#N/A	#N/A	#N/A
M15061	SNP	AGCAAGACGAAAACCCGAGGTA	22	10	G10A	0.861969	1.05228	0.847023	0.321136	0.826001	2.99983
M15062	SNP	AGCAAGACGCAAACCCGAGGTA	22	10	G10C	1.27924	0.0583248	1.56565	-1.97041	-0.000835419	1.55274
M15063	SNP	AGCAAGACGTAAACCCGAGGTA	22	10	G10T	0.325536	-1.46417	-2.59661	1.15197	-0.113686	0.506765
M15250	SNP	ACGGATGCTAGTTTGTAAAACA	22	10	G10A	-0.328503	1.02789	-0.705663	-0.808144	-0.261108	1.90595
M15251	SNP	ACGGATGCTCGTTTGTAAAACA	22	10	G10C	3.70122	1.08918	-3.05449	0.646557	1.19763	0.76393
M15252	SNP	ACGGATGCTTGTTTGTAAAACA	22	10	G10T	-0.345325	2.32235	-1.87672	-0.652621	-4.24641	0.955362
M15565	SNP	ATCTAACTTAATGTTAGTACCG	22	10	G10A	-4.59557	-4.3713	1.26659	-2.19013	-1.97492	1.28043
M15566	SNP	ATCTAACTTCATGTTAGTACCG	22	10	G10C	5.76082	3.80522	-1.78118	-5.7456	-1.64898	-2.86176
M15567	SNP	ATCTAACTTTATGTTAGTACCG	22	10	G10T	-4.22124	-1.88821	-5.1107	-3.08099	-2.95675	-3.84635
M15631	SNP	ACGTACGGCACTCATAGGAAGA	22	10	T10A	-0.608213	-1.91961	2.31171	0.0491537	2.80063	-6.17747
M15632	SNP	ACGTACGGCCCTCATAGGAAGA	22	10	T10C	-0.970049	2.13966	2.14618	3.6835	-2.76428	1.03953
M15633	SNP	ACGTACGGCGCTCATAGGAAGA	22	10	T10G	-1.11134	-1.03471	-1.23148	-2.26281	-0.0998532	0.0113832
M15697	SNP	GGCTGTAGCCGGAGCGTGCGTC	22	10	A10C	0.827455	1.10549	0.796019	1.10803	1.0044	0.477007
M15698	SNP	GGCTGTAGCGGGAGCGTGCGTC	22	10	A10G	-1.30384	2.49773	-1.41869	0.171639	-3.88506	1.05075
M15699	SNP	GGCTGTAGCTGGAGCGTGCGTC	22	10	A10T	-1.90662	0.83405	-2.10979	0.0872943	-0.0356043	1.97567
M15118	SNP	TTAGAGATGATCCATTCAGCG	21	7	C7A	1.66272	0.609154	1.37511	3.13963	2.44141	0.697241
M15119	SNP	TTAGAGGTGATCCATTCAGCG	21	7	C7G	2.29808	2.23106	3.3982	1.72608	1.20101	3.34271
M15120	SNP	TTAGAGTTGATCCATTCAGCG	21	7	C7T	2.85035	3.60547	3.08641	3.87733	3.76558	3.30893
M15307	SNP	GCTAACACATCTAAGGTATGG	21	7	G7A	2.77943	0.674922	1.64788	3.69452	1.09268	3.71195
M15308	SNP	GCTAACCCATCTAAGGTATGG	21	7	G7C	-0.891421	-5.40409	-2.39869	-1.37239	-3.12216	1.00598
M15309	SNP	GCTAACTCATCTAAGGTATGG	21	7	G7T	1.73707	1.22084	0.31324	1.04292	1.68402	-0.425095
M15370	SNP	ACGGTTACTTGTTCAGCGAAC	21	7	G7A	-4.33789	-5.35705	-3.36432	1.86253	-4.59521	-5.58479
M15371	SNP	ACGGTTCCTTGTTCAGCGAAC	21	7	G7C	-5.52364	-0.392833	1.89712	0.50119	-0.131098	-4.74992
M15372	SNP	ACGGTTTCTTGTTCAGCGAAC	21	7	G7T	1.57799	-0.246719	0.979072	1.85918	2.30292	1.99367
M15493	SNP	CGTCGCAAGTTGTGAGGCTGT	21	7	G7A	0.476719	1.59339	1.15105	1.97029	-0.102223	-0.313081
M15494	SNP	CGTCGCCAGTTGTGAGGCTGT	21	7	G7C	0.707394	-0.104382	-0.029104	-1.07618	1.58568	0.820185
M15495	SNP	CGTCGCTAGTTGTGAGGCTGT	21	7	G7T	-0.730792	-1.30192	0.632074	-0.484009	-0.291283	0.499416
M15754	SNP	CTCGCGCAAGAGCCCGGACAC	21	7	A7C	1.0176	-3.11385	0.105651	1.10255	-0.786687	-1.84951
M15755	SNP	CTCGCGGAAGAGCCCGGACAC	21	7	A7G	1.8881	-1.86057	0.421204	-0.429904	2.14128	-1.18826
M15756	SNP	CTCGCGTAAGAGCCCGGACAC	21	7	A7T	1.48329	-2.05366	0.386715	1.21859	-1.49895	1.6013
M16147	SNP	GAGGGAAAAGCCGAAACCGGC	21	7	G7A	#N/A	#N/A	#N/A	#N/A	#N/A	#N/A
M16148	SNP	GAGGGACAAGCCGAAACCGGC	21	7	G7C	-4.65923	0.757001	3.57427	-4.60151	1.15859	2.78428
M16149	SNP	GAGGGATAAGCCGAAACCGGC	21	7	G7T	-2.66457	-3.32214	-2.21908	-2.61418	-3.44897	0.469702
M16210	SNP	CCACGGAAAAAGTGCGCGCCG	21	7	T7A	-0.869229	-0.610975	-0.527575	-0.311446	0.513191	-0.0466335
M16211	SNP	CCACGGCAAAAGTGCGCGCCG	21	7	T7C	0.400016	0.444921	-0.438086	-0.930067	-0.191448	0.788392
M16212	SNP	CCACGGGAAAAGTGCGCGCCG	21	7	T7G	-1.18983	0.367636	-2.07953	-0.100706	-2.26239	-0.550727
M16273	SNP	CCGGCGATAGCCACTCCGAAG	21	7	T7A	-3.26165	-3.87893	-5.36534	0.357155	-7.05132	-5.01338
M16274	SNP	CCGGCGCTAGCCACTCCGAAG	21	7	T7C	-2.60666	1.26299	-5.3735	4.53276	0.897746	-2.89846
M16275	SNP	CCGGCGGTAGCCACTCCGAAG	21	7	T7G	1.05242	3.22401	0.759478	2.24037	-4.04035	0.993073
M16726	SNP	ACCAACAGATTTGAGCCGGCG	21	7	G7A	-1.24533	2.73158	-0.207577	-0.803774	0.716107	-5.4347
M16727	SNP	ACCAACCGATTTGAGCCGGCG	21	7	G7C	-5.80602	-1.64886	-6.1002	-2.42	-3.49524	-4.28131
M16728	SNP	ACCAACTGATTTGAGCCGGCG	21	7	G7T	0.622057	1.9451	-0.477406	-2.83279	-0.217322	3.33206
M17179	SNP	GCTTCCCGTAGCGACAGAAGC	21	7	A7C	#N/A	#N/A	#N/A	#N/A	#N/A	#N/A
M17180	SNP	GCTTCCGGTAGCGACAGAAGC	21	7	A7G	#N/A	#N/A	#N/A	#N/A	#N/A	#N/A
M17181	SNP	GCTTCCTGTAGCGACAGAAGC	21	7	A7T	#N/A	#N/A	#N/A	#N/A	#N/A	#N/A
M17821	SNP	CAGGCTACTTACAGGCAGCCC	21	7	C7A	#N/A	#N/A	#N/A	#N/A	#N/A	#N/A
M17822	SNP	CAGGCTGCTTACAGGCAGCCC	21	7	C7G	#N/A	#N/A	#N/A	#N/A	#N/A	#N/A
M17823	SNP	CAGGCTTCTTACAGGCAGCCC	21	7	C7T	-6.53381	5.30411	-2.14527	-3.48428	-2.52554	-3.0179
M17884	SNP	TTGAGCCGGACCCCGAAAGGG	21	7	A7C	1.28613	-1.01797	1.46115	0.727553	0.08855	-2.18426
M17885	SNP	TTGAGCGGGACCCCGAAAGGG	21	7	A7G	0.575716	0.103755	-0.827215	1.39607	3.23073	2.6632
M17886	SNP	TTGAGCTGGACCCCGAAAGGG	21	7	A7T	1.82242	0.178523	0.428915	-1.07715	1.94252	2.14339
M18007	SNP	GAAGAGCTTGTCAACAGGTTT	21	7	A7C	0.793718	-0.0598714	0.212674	-1.48501	0.282467	1.1402
M18008	SNP	GAAGAGGTTGTCAACAGGTTT	21	7	A7G	1.84097	-0.851266	1.96176	0.355088	1.79701	0.854577
M18009	SNP	GAAGAGTTTGTCAACAGGTTT	21	7	A7T	2.62476	1.36105	-2.82794	-0.323661	1.40021	0.682222
M18070	SNP	TAGCCAAGGTAGCGTCTCGCT	21	7	T7A	1.50718	-0.0084302	1.03768	3.30396	0.483326	-2.96927
M18071	SNP	TAGCCACGGTAGCGTCTCGCT	21	7	T7C	-2.7067	-0.564484	1.38855	-2.7825	-0.140949	-0.0195241
M18072	SNP	TAGCCAGGGTAGCGTCTCGCT	21	7	T7G	1.31528	-0.0153522	1.88554	0.776904	-0.94303	2.23781
M15121	SNP	TTAGAGCAGATCCATTCAGCG	21	8	T8A	-0.13685	3.89595	3.88523	1.29211	2.89315	2.88463
M15122	SNP	TTAGAGCCGATCCATTCAGCG	21	8	T8C	1.64761	3.93185	4.70248	-1.85997	-1.15561	-1.84431
M15123	SNP	TTAGAGCGGATCCATTCAGCG	21	8	T8G	1.1782	3.6874	0.934589	1.46839	3.76618	-3.19896
M15310	SNP	GCTAACGAATCTAAGGTATGG	21	8	C8A	1.72295	1.89162	1.44683	1.19049	1.91809	1.98583
M15311	SNP	GCTAACGGATCTAAGGTATGG	21	8	C8G	1.43969	0.345253	2.6602	1.04002	-0.43038	2.12305
M15312	SNP	GCTAACGTATCTAAGGTATGG	21	8	C8T	1.53589	1.98667	2.91329	2.47348	3.17611	0.922173
M15373	SNP	ACGGTTGATTGTTCAGCGAAC	21	8	C8A	2.96766	1.6899	-3.28707	1.43397	-2.78706	-2.13587
M15374	SNP	ACGGTTGGTTGTTCAGCGAAC	21	8	C8G	-5.20889	-4.44158	0.929404	-2.98108	1.33722	0.549306
M15375	SNP	ACGGTTGTTTGTTCAGCGAAC	21	8	C8T	-3.87238	-2.18343	-3.34202	-4.53628	0.721519	-1.22353
M15496	SNP	CGTCGCGCGTTGTGAGGCTGT	21	8	A8C	-0.0754286	-0.170189	0.786135	0.392187	0.485268	1.02925
M15497	SNP	CGTCGCGGGTTGTGAGGCTGT	21	8	A8G	0.49976	-0.0847476	-0.566074	0.242755	1.45036	1.51893
M15498	SNP	CGTCGCGTGTTGTGAGGCTGT	21	8	A8T	-0.442034	0.47223	0.846475	0.635417	0.294934	0.784779
M15757	SNP	CTCGCGACAGAGCCCGGACAC	21	8	A8C	-2.12992	-2.77548	-2.60848	1.69687	-3.07567	0.68463
M15758	SNP	CTCGCGAGAGAGCCCGGACAC	21	8	A8G	-1.55747	0.752994	-0.778669	1.7057	-0.661382	1.32251
M15759	SNP	CTCGCGATAGAGCCCGGACAC	21	8	A8T	-2.63776	-0.958154	-1.95626	-0.560267	-1.77557	-1.74058
M16150	SNP	GAGGGAGCAGCCGAAACCGGC	21	8	A8C	0.661364	-5.06105	-3.95856	-3.33192	2.06559	0.298631
M16151	SNP	GAGGGAGGAGCCGAAACCGGC	21	8	A8G	2.0647	-0.515185	1.8166	-1.31789	1.96486	2.96714
M16152	SNP	GAGGGAGTAGCCGAAACCGGC	21	8	A8T	-3.73975	-3.95317	2.12929	-3.35113	0.299503	-0.577593
M16213	SNP	CCACGGTCAAAGTGCGCGCCG	21	8	A8C	0.405617	-0.452518	-0.546742	-0.226182	-0.0618916	0.452674
M16214	SNP	CCACGGTGAAAGTGCGCGCCG	21	8	A8G	-0.984852	-0.451812	-0.373777	-0.860427	0.666993	1.22498
M16215	SNP	CCACGGTTAAAGTGCGCGCCG	21	8	A8T	-0.733649	-0.243293	0.129942	-0.254622	-0.280735	0.202383
M16450	SNP	GTAGGTGATTTCACCTCCAGTAT	23	3	C3A	0.453373	-4.64504	1.20664	-8.57469	2.98922	-0.173492
M16451	SNP	GTGGGTGATTTCACCTCCAGTAT	23	3	C3G	-1.79951	-4.22638	2.1674	-3.4647	1.71853	4.49048
M16452	SNP	GTTGGTGATTTCACCTCCAGTAT	23	3	C3T	#N/A	#N/A	#N/A	#N/A	#N/A	#N/A
M16579	SNP	GTAACCTACAGGTAGGAGCCAGT	23	3	T3A	-1.50396	-2.88906	-6.28589	-2.5121	-6.97913	-3.20075
M16580	SNP	GTCACCTACAGGTAGGAGCCAGT	23	3	T3C	0.362563	0.430304	-2.91305	3.13812	0.925498	1.94349
M16581	SNP	GTGACCTACAGGTAGGAGCCAGT	23	3	T3G	-9.45347	-9.38794	-6.40515	-3.39786	-3.56123	-1.90254
M16903	SNP	CTAAAATGTGAACCCATTTCCCA	23	3	C3A	-2.23165	-2.42145	0.667024	-1.75008	-2.93732	2.31162
M16904	SNP	CTGAAATGTGAACCCATTTCCCA	23	3	C3G	#N/A	#N/A	#N/A	#N/A	#N/A	#N/A
M16905	SNP	CTTAAATGTGAACCCATTTCCCA	23	3	C3T	0.871685	2.85543	-1.44948	-0.893376	2.28934	-0.112718
M16972	SNP	CGCACGTTTTACGAAGATTCGGT	23	3	A3C	#N/A	#N/A	#N/A	#N/A	#N/A	#N/A
M16973	SNP	CGGACGTTTTACGAAGATTCGGT	23	3	A3G	1.21074	3.13995	1.04241	-0.0135802	2.73212	1.26918
M16974	SNP	CGTACGTTTTACGAAGATTCGGT	23	3	A3T	1.64663	-5.49542	-8.7576	-5.64544	-3.4134	3.14139
M17482	SNP	CTCTGGTTCCGGCGTTACCAAAA	23	3	A3C	1.80687	2.90917	0.138399	3.25587	-1.91186	0.627091
M17483	SNP	CTGTGGTTCCGGCGTTACCAAAA	23	3	A3G	1.09314	0.291684	-2.58865	-0.543358	-4.35298	1.4358
M17484	SNP	CTTTGGTTCCGGCGTTACCAAAA	23	3	A3T	-1.44756	0.469718	3.95436	-0.469948	-3.82383	-4.80038
M17551	SNP	GGCGGGGACGAAGGTCTCGTTCT	23	3	A3C	1.40039	-0.126354	-0.465262	-0.523786	-3.34288	1.5633
M17552	SNP	GGGGGGGACGAAGGTCTCGTTCT	23	3	A3G	-0.607561	0.469715	2.53946	2.25178	-1.23295	0.450664
M17553	SNP	GGTGGGGACGAAGGTCTCGTTCT	23	3	A3T	-1.55084	3.10765	4.40515	-1.82847	-2.6996	1.71688
M17740	SNP	GAATCACCCGTTATTACGTCAGT	23	3	C3A	-3.52645	1.09131	0.956993	-0.775756	-2.67494	-2.51476
M17741	SNP	GAGTCACCCGTTATTACGTCAGT	23	3	C3G	0.698875	2.19273	-1.84113	-9.59479	-3.62552	0.680795
M17742	SNP	GATTCACCCGTTATTACGTCAGT	23	3	C3T	0.627416	1.68224	-5.2687	-2.0083	-1.56342	-0.853965
M14908	SNP	GAGATCCCTGGGCCGAAGCCCGC	23	4	G4A	0.0704026	1.27976	0.730384	-0.0517635	1.96536	-0.219328
M14909	SNP	GAGCTCCCTGGGCCGAAGCCCGC	23	4	G4C	-0.724043	1.43352	0.182443	0.485048	0.182463	1.63121
M14910	SNP	GAGTTCCCTGGGCCGAAGCCCGC	23	4	G4T	-1.34648	-3.2471	0.430841	-2.24022	-4.00246	-1.64877
M15808	SNP	GCAACGTTGGAGAACGTGCATTG	23	4	C4A	#N/A	#N/A	#N/A	#N/A	#N/A	#N/A
M15809	SNP	GCAGCGTTGGAGAACGTGCATTG	23	4	C4G	#N/A	#N/A	#N/A	#N/A	#N/A	#N/A
M15810	SNP	GCATCGTTGGAGAACGTGCATTG	23	4	C4T	#N/A	#N/A	#N/A	#N/A	#N/A	#N/A
M16009	SNP	GCAACTAAGGTATGGACCATCGA	23	4	T4A	-3.1969	2.0073	-3.57682	-2.30078	-5.00109	4.12488
M16010	SNP	GCACCTAAGGTATGGACCATCGA	23	4	T4C	-0.690125	-2.20372	1.74398	0.103321	-0.678211	-1.62608
M16011	SNP	GCAGCTAAGGTATGGACCATCGA	23	4	T4G	-3.48745	3.35436	-4.33227	-3.52719	-1.35787	1.1325
M16453	SNP	GTCAGTGATTTCACCTCCAGTAT	23	4	G4A	-0.754301	-3.56557	-0.94527	-2.87458	-1.88604	-2.79303
M16454	SNP	GTCCGTGATTTCACCTCCAGTAT	23	4	G4C	-3.3838	3.0459	-1.3162	-9.5875	-4.28269	-6.40653
M16455	SNP	GTCTGTGATTTCACCTCCAGTAT	23	4	G4T	-3.68498	-2.33261	-3.14502	-7.39841	-2.12721	-7.70554
M16582	SNP	GTTCCCTACAGGTAGGAGCCAGT	23	4	A4C	-3.85705	0.88134	-4.04976	1.23373	-3.4814	-1.69403
M16583	SNP	GTTGCCTACAGGTAGGAGCCAGT	23	4	A4G	-0.353654	-2.68737	3.06383	0.682374	-2.2876	3.7269
M16584	SNP	GTTTCCTACAGGTAGGAGCCAGT	23	4	A4T	-6.75832	-1.77582	-1.79328	-0.869929	2.17739	-1.14246
M16906	SNP	CTCCAATGTGAACCCATTTCCCA	23	4	A4C	0.920672	2.78556	1.04436	-0.343009	2.42865	0.811035
M16907	SNP	CTCGAATGTGAACCCATTTCCCA	23	4	A4G	-1.83074	-2.36494	-2.12736	-0.514231	-2.86457	0.538114
M16908	SNP	CTCTAATGTGAACCCATTTCCCA	23	4	A4T	0.00888278	1.95231	-1.92084	2.45868	-1.07661	0.648459
M16975	SNP	CGACCGTTTTACGAAGATTCGGT	23	4	A4C	-2.19725	2.07109	0.971892	1.75891	3.05755	2.77274
M16976	SNP	CGAGCGTTTTACGAAGATTCGGT	23	4	A4G	#N/A	#N/A	#N/A	#N/A	#N/A	#N/A
M16977	SNP	CGATCGTTTTACGAAGATTCGGT	23	4	A4T	#N/A	#N/A	#N/A	#N/A	#N/A	#N/A
M17485	SNP	CTAAGGTTCCGGCGTTACCAAAA	23	4	T4A	2.1024	1.38143	-0.440301	0.561905	5.47971	1.14973
M17486	SNP	CTACGGTTCCGGCGTTACCAAAA	23	4	T4C	-1.27192	0.264013	0.182553	-1.27016	0.796017	-1.62111
M17487	SNP	CTAGGGTTCCGGCGTTACCAAAA	23	4	T4G	4.19871	0.593266	1.63049	-5.05571	-0.00668608	1.12999
M17554	SNP	GGAAGGGACGAAGGTCTCGTTCT	23	4	G4A	1.73049	-1.14822	2.68884	-0.0572983	-3.2489	-4.3139
M17555	SNP	GGACGGGACGAAGGTCTCGTTCT	23	4	G4C	#N/A	#N/A	#N/A	#N/A	#N/A	#N/A
M17556	SNP	GGATGGGACGAAGGTCTCGTTCT	23	4	G4T	-3.10164	0.400952	-0.500276	-3.93225	-4.23309	1.17807
M17743	SNP	GACACACCCGTTATTACGTCAGT	23	4	T4A	-3.52333	1.78791	4.11781	-2.79193	2.98282	4.03029
M17744	SNP	GACCCACCCGTTATTACGTCAGT	23	4	T4C	-2.8073	-3.42711	-2.10022	-1.42436	-2.87107	-3.27008
M17745	SNP	GACGCACCCGTTATTACGTCAGT	23	4	T4G	#N/A	#N/A	#N/A	#N/A	#N/A	#N/A
M14911	SNP	GAGGACCCTGGGCCGAAGCCCGC	23	5	T5A	1.29563	0.113134	0.497841	4.62514	-0.369828	1.36596
M14912	SNP	GAGGCCCCTGGGCCGAAGCCCGC	23	5	T5C	0.617441	-2.29443	-1.71924	2.02156	-2.42839	-0.730044
M14913	SNP	GAGGGCCCTGGGCCGAAGCCCGC	23	5	T5G	-0.714939	-0.659774	0.938655	1.33032	-1.01146	0.971307
M15811	SNP	GCACAGTTGGAGAACGTGCATTG	23	5	C5A	#N/A	#N/A	#N/A	#N/A	#N/A	#N/A
M15812	SNP	GCACGGTTGGAGAACGTGCATTG	23	5	C5G	#N/A	#N/A	#N/A	#N/A	#N/A	#N/A
M15813	SNP	GCACTGTTGGAGAACGTGCATTG	23	5	C5T	#N/A	#N/A	#N/A	#N/A	#N/A	#N/A
M16012	SNP	GCATATAAGGTATGGACCATCGA	23	5	C5A	-1.35014	-3.13778	-0.765147	-0.715285	-1.65909	2.2429
M16013	SNP	GCATGTAAGGTATGGACCATCGA	23	5	C5G	-3.5169	-4.07792	0.979769	-5.50181	-3.61146	-5.89221
M16014	SNP	GCATTTAAGGTATGGACCATCGA	23	5	C5T	2.26249	-4.50251	-4.32781	2.45561	-3.17317	-3.6121
M16456	SNP	GTCGATGATTTCACCTCCAGTAT	23	5	G5A	-5.35384	-3.32301	-2.30362	0.436198	0.842267	0.289246
M16457	SNP	GTCGCTGATTTCACCTCCAGTAT	23	5	G5C	-3.84717	-3.83437	4.32858	-4.87921	-5.17501	-5.95132
M16458	SNP	GTCGTTGATTTCACCTCCAGTAT	23	5	G5T	2.23301	4.74705	1.7141	-0.919633	3.29692	-2.00722
M16585	SNP	GTTAACTACAGGTAGGAGCCAGT	23	5	C5A	-2.73232	-1.42392	-0.103109	-1.93611	4.22687	-0.67613
M16586	SNP	GTTAGCTACAGGTAGGAGCCAGT	23	5	C5G	-5.89491	2.62279	-3.21372	-5.89491	-6.33708	-0.0187525
M16587	SNP	GTTATCTACAGGTAGGAGCCAGT	23	5	C5T	-3.31016	-0.32148	-1.38023	-4.03423	-3.67323	2.99514
M16909	SNP	CTCACATGTGAACCCATTTCCCA	23	5	A5C	-1.43882	0.0780625	-4.44624	-1.3347	-1.65303	-1.36746
M16910	SNP	CTCAGATGTGAACCCATTTCCCA	23	5	A5G	1.12305	1.76689	0.184168	-0.73259	0.357911	1.1436
M16911	SNP	CTCATATGTGAACCCATTTCCCA	23	5	A5T	-1.8774	1.51686	1.61276	0.33165	-1.89869	2.44529
M15895	SNP	TGCGATTGCAGAGGGAATCGGG	22	10	T10A	-4.54028	-4.65788	-4.22787	-5.20417	-3.53855	0.141197
M15896	SNP	TGCGATTGCCGAGGGAATCGGG	22	10	T10C	-0.430863	-0.321871	-1.43759	-1.67298	-4.45013	1.1674
M15897	SNP	TGCGATTGCGGAGGGAATCGGG	22	10	T10G	-5.40032	-6.7998	-5.43808	-10.0577	-6.60863	-5.97334
M15961	SNP	ATGAAAGCAACGACCCCTTTCT	22	10	C10A	0.596933	-2.13583	-1.86791	-3.03664	-2.09954	-2.13189
M15962	SNP	ATGAAAGCAGCGACCCCTTTCT	22	10	C10G	-3.6683	-3.49417	0.956955	2.31632	-0.728783	1.71185
M15963	SNP	ATGAAAGCATCGACCCCTTTCT	22	10	C10T	4.14572	-1.71878	0.181298	-1.7639	4.91747	3.18345
M16345	SNP	AGCGAGGTCAGTCCCACCGAAG	22	10	C10A	-0.28541	0.199835	1.17454	1.5265	2.11749	-1.80065
M16346	SNP	AGCGAGGTCGGTCCCACCGAAG	22	10	C10G	0.118592	-0.241793	-3.39922	0.179622	-0.0351513	3.39488
M16347	SNP	AGCGAGGTCTGTCCCACCGAAG	22	10	C10T	-0.264545	-1.36381	0.74011	-0.310978	-0.315809	-2.0248
M16669	SNP	GCGGATCACAGCTTCCAGTAGC	22	10	C10A	-2.86085	-1.26555	1.81575	2.30265	3.04767	-2.55004
M16670	SNP	GCGGATCACGGCTTCCAGTAGC	22	10	C10G	2.34832	1.60699	0.359148	-0.338572	0.268607	-0.20911
M16671	SNP	GCGGATCACTGCTTCCAGTAGC	22	10	C10T	3.64034	-0.706996	1.14903	1.62654	1.87802	0.65554
M16798	SNP	AAGCCTGTGCACGCGAGTTAGA	22	10	A10C	-0.16305	2.77006	-1.13071	1.70343	1.71488	-0.652363
M16799	SNP	AAGCCTGTGGACGCGAGTTAGA	22	10	A10G	0.0297608	0.770067	0.194978	-2.60125	-0.0672926	-0.00925301
M16800	SNP	AAGCCTGTGTACGCGAGTTAGA	22	10	A10T	-5.02082	-3.07551	-5.85976	-2.9277	-8.43577	2.12595
M17122	SNP	GTGGGAGAACACTCCACACCAG	22	10	A10C	-8.23515	1.83635	1.31091	-5.18562	-3.07106	-3.89412
M17123	SNP	GTGGGAGAAGACTCCACACCAG	22	10	A10G	#N/A	#N/A	#N/A	#N/A	#N/A	#N/A
M17124	SNP	GTGGGAGAATACTCCACACCAG	22	10	A10T	#N/A	#N/A	#N/A	#N/A	#N/A	#N/A
M17251	SNP	AACAGTCTGAGTTGCCACTTTA	22	10	G10A	-2.62562	-0.893621	-2.3265	-3.28952	-2.57714	-1.94937
M17252	SNP	AACAGTCTGCGTTGCCACTTTA	22	10	G10C	-3.85874	-2.64788	3.80293	0.778856	-1.88604	-1.80235
M17253	SNP	AACAGTCTGTGTTGCCACTTTA	22	10	G10T	1.61062	2.26159	3.51736	-0.252368	0.518674	3.10762
M17437	SNP	GTAACGGTTACTTGTTCAGCGA	22	10	G10A	-1.3799	2.7309	-1.88093	1.09738	0.272063	1.74074
M17438	SNP	GTAACGGTTCCTTGTTCAGCGA	22	10	G10C	-2.6069	-2.03916	2.85191	-4.84582	-4.69441	3.78661
M17439	SNP	GTAACGGTTTCTTGTTCAGCGA	22	10	G10T	-0.40782	-1.61477	1.31953	-0.0130782	0.607952	0.556529
M14998	SNP	CTCATAGGAAAAAACTCTTGAA	22	11	G11A	-1.72803	-0.934279	-4.22449	0.644059	-3.36991	0.665179
M14999	SNP	CTCATAGGAACAAACTCTTGAA	22	11	G11C	0.863942	-3.46255	-4.27308	0.0159089	2.1512	1.63947
M15000	SNP	CTCATAGGAATAAACTCTTGAA	22	11	G11T	-0.413836	1.36032	2.46647	3.72233	-4.77803	4.08368
M15064	SNP	AGCAAGACGGCAACCCGAGGTA	22	11	A11C	-0.844821	0.021344	-0.706225	-0.0255235	-3.10852	1.06479
M15065	SNP	AGCAAGACGGGAACCCGAGGTA	22	11	A11G	0.235278	-2.41146	-5.12744	-1.80009	-1.89613	0.0697096
M15066	SNP	AGCAAGACGGTAACCCGAGGTA	22	11	A11T	-0.163687	-0.612669	2.45521	-1.43598	-0.438716	1.54743
M15253	SNP	ACGGATGCTGATTTGTAAAACA	22	11	G11A	-1.71559	1.28656	-2.07769	3.27033	1.38078	-2.58357
M15254	SNP	ACGGATGCTGCTTTGTAAAACA	22	11	G11C	0.120842	1.6056	1.48306	-0.219944	0.449286	0.165354
M15255	SNP	ACGGATGCTGTTTTGTAAAACA	22	11	G11T	1.71953	2.03329	1.6759	3.33293	-1.36397	0.675453
M15568	SNP	ATCTAACTTGCTGTTAGTACCG	22	11	A11C	-0.363434	6.41915	0.34025	1.54159	-0.779907	-2.7231
M15569	SNP	ATCTAACTTGGTGTTAGTACCG	22	11	A11G	-0.419229	0.373847	1.00234	0.250821	1.52443	-2.91017
M15570	SNP	ATCTAACTTGTTGTTAGTACCG	22	11	A11T	-2.07065	-0.855091	0.641838	2.46312	-4.09418	-5.28167
M15634	SNP	ACGTACGGCTATCATAGGAAGA	22	11	C11A	-2.12774	2.49453	3.39092	1.50773	-0.613188	3.08829
M15635	SNP	ACGTACGGCTGTCATAGGAAGA	22	11	C11G	3.97537	-0.79334	-0.8293	4.52949	1.72994	1.21022
M15636	SNP	ACGTACGGCTTTCATAGGAAGA	22	11	C11T	1.13745	1.70141	-0.217916	-4.87419	-3.61057	-0.425611
M15700	SNP	GGCTGTAGCAAGAGCGTGCGTC	22	11	G11A	-6.46084	-5.58847	1.66972	0.108565	-2.36882	-5.29077
M15701	SNP	GGCTGTAGCACGAGCGTGCGTC	22	11	G11C	-1.08553	-2.07212	0.717127	1.52092	-1.48769	2.52381
M15702	SNP	GGCTGTAGCATGAGCGTGCGTC	22	11	G11T	-1.74677	-1.7399	0.472352	2.47697	0.28166	-2.08639
M15898	SNP	TGCGATTGCTAAGGGAATCGGG	22	11	G11A	-4.06408	-3.87893	-3.08901	-2.55266	-2.7596	-4.16959
M15899	SNP	TGCGATTGCTCAGGGAATCGGG	22	11	G11C	-2.98028	-1.99123	-5.80947	-4.67973	-4.16675	0.780833
M15900	SNP	TGCGATTGCTTAGGGAATCGGG	22	11	G11T	-0.947887	-6.16351	-1.26561	1.30407	-5.04418	-3.89782
M15964	SNP	ATGAAAGCACAGACCCCTTTCT	22	11	C11A	-0.435783	-3.86076	-3.89496	-1.27075	1.61834	-0.628985
M15965	SNP	ATGAAAGCACGGACCCCTTTCT	22	11	C11G	0.242574	1.90663	1.07278	0.843133	2.19771	3.49745
M15966	SNP	ATGAAAGCACTGACCCCTTTCT	22	11	C11T	-1.31777	0.401884	2.45338	-1.06565	1.53148	-0.309355
M16348	SNP	AGCGAGGTCCATCCCACCGAAG	22	11	G11A	-1.54823	1.43723	-1.04003	0.389212	2.43558	-0.848022
M16349	SNP	AGCGAGGTCCCTCCCACCGAAG	22	11	G11C	-1.79267	-3.03313	1.94776	-0.394584	-4.2873	-0.65791
M16350	SNP	AGCGAGGTCCTTCCCACCGAAG	22	11	G11T	-0.124327	2.20199	-0.688736	-2.89228	-4.65938	1.78181
M16672	SNP	GCGGATCACCACTTCCAGTAGC	22	11	G11A	-2.92743	2.46991	-3.62004	-1.23137	-1.63864	-3.53648
M16673	SNP	GCGGATCACCCCTTCCAGTAGC	22	11	G11C	-1.49064	0.68949	-1.10937	1.60452	-1.08122	-0.744663
M16674	SNP	GCGGATCACCTCTTCCAGTAGC	22	11	G11T	-0.466716	-0.464409	-5.75511	0.326445	-2.49655	-1.29319
M16801	SNP	AAGCCTGTGACCGCGAGTTAGA	22	11	A11C	-1.68813	0.965363	1.35761	2.11562	2.70336	-0.686891
M16802	SNP	AAGCCTGTGAGCGCGAGTTAGA	22	11	A11G	1.93375	-6.06183	0.21124	-0.85802	0.842276	1.87577
M16803	SNP	AAGCCTGTGATCGCGAGTTAGA	22	11	A11T	-0.156659	-3.63771	-5.44887	-5.51776	-4.92066	-2.91783
M17125	SNP	GTGGGAGAAACCTCCACACCAG	22	11	A11C	#N/A	#N/A	#N/A	#N/A	#N/A	#N/A
M17126	SNP	GTGGGAGAAAGCTCCACACCAG	22	11	A11G	-3.48445	-1.63215	-1.32398	-3.25434	-0.870302	-1.89688
M17127	SNP	GTGGGAGAAATCTCCACACCAG	22	11	A11T	5.0502	2.98005	-1.25158	0.0745012	3.91247	-4.99601
M17254	SNP	AACAGTCTGGATTGCCACTTTA	22	11	G11A	4.56355	-0.481109	-1.68282	1.86205	0.0896426	-0.49814
M17255	SNP	AACAGTCTGGCTTGCCACTTTA	22	11	G11C	-1.62549	1.7778	0.0892606	1.27671	-3.18783	-0.62703
M17256	SNP	AACAGTCTGGTTTGCCACTTTA	22	11	G11T	-1.29611	1.9755	3.43247	-1.13528	0.209395	-0.918157
M17440	SNP	GTAACGGTTGATTGTTCAGCGA	22	11	C11A	1.01701	-2.61166	1.0961	-1.09566	-1.82853	2.26832
M17441	SNP	GTAACGGTTGGTTGTTCAGCGA	22	11	C11G	-3.29599	-1.26368	-0.177016	-1.49807	-0.807615	-1.35956
M17442	SNP	GTAACGGTTGTTTGTTCAGCGA	22	11	C11T	0.899062	1.13658	0.031779	0.620844	1.93029	0.914577
M15001	SNP	CTCATAGGAAGCAACTCTTGAA	22	12	A12C	-0.897673	0.874483	0.473398	-4.02143	-2.25733	-1.79078
M15002	SNP	CTCATAGGAAGGAACTCTTGAA	22	12	A12G	1.921	-3.37499	-1.16781	-2.99354	-0.792731	-1.04409
M15003	SNP	CTCATAGGAAGTAACTCTTGAA	22	12	A12T	-3.98929	-2.72976	3.27202	5.28873	-1.38977	3.08147
M15067	SNP	AGCAAGACGGACACCCGAGGTA	22	12	A12C	-0.936455	0.429194	1.03819	0.830423	0.838581	1.80548
M15068	SNP	AGCAAGACGGAGACCCGAGGTA	22	12	A12G	-1.59301	-1.58636	-4.37036	-0.768353	-4.71318	2.41946
M15069	SNP	AGCAAGACGGATACCCGAGGTA	22	12	A12T	-0.542136	-1.14492	-0.526348	-0.203234	3.90143	1.27988
M15256	SNP	ACGGATGCTGGATTGTAAAACA	22	12	T12A	-0.15823	2.51216	-1.88522	-0.80575	-0.065148	1.6207
M15257	SNP	ACGGATGCTGGCTTGTAAAACA	22	12	T12C	-0.978667	0.36762	-0.0925715	0.211745	-2.33758	-0.249086
M15258	SNP	ACGGATGCTGGGTTGTAAAACA	22	12	T12G	-0.554383	-2.34595	0.525328	-0.289844	-0.215347	-2.60841
M15571	SNP	ATCTAACTTGAAGTTAGTACCG	22	12	T12A	4.89857	-2.97827	0.353421	-2.50245	-2.77287	0.357511
M15572	SNP	ATCTAACTTGACGTTAGTACCG	22	12	T12C	#N/A	#N/A	#N/A	#N/A	#N/A	#N/A
M15573	SNP	ATCTAACTTGAGGTTAGTACCG	22	12	T12G	#N/A	#N/A	#N/A	#N/A	#N/A	#N/A
M15637	SNP	ACGTACGGCTCACATAGGAAGA	22	12	T12A	1.23676	-1.32896	-3.7487	-4.7079	3.62508	2.92972
M15638	SNP	ACGTACGGCTCCCATAGGAAGA	22	12	T12C	2.78933	1.83486	0.432401	-0.33506	-2.15845	1.34128
M15639	SNP	ACGTACGGCTCGCATAGGAAGA	22	12	T12G	0.703905	-0.0702171	-0.0954906	-1.86034	-0.235315	-1.778
M15703	SNP	GGCTGTAGCAGAAGCGTGCGTC	22	12	G12A	-2.92844	-3.5972	1.04095	2.5367	-2.67496	0.97339
M15704	SNP	GGCTGTAGCAGCAGCGTGCGTC	22	12	G12C	-0.800831	-1.89278	-1.94764	-0.183358	2.92175	1.72719
M15705	SNP	GGCTGTAGCAGTAGCGTGCGTC	22	12	G12T	-8.3773	-2.74456	-4.17883	-3.15245	-2.31651	-0.563439
M15901	SNP	TGCGATTGCTGCGGGAATCGGG	22	12	A12C	0.720796	1.18205	1.91841	-0.282177	2.44426	-0.653584
M15902	SNP	TGCGATTGCTGGGGGAATCGGG	22	12	A12G	-0.192413	0.950188	-4.16035	-4.08084	-3.04375	-3.62454
M15903	SNP	TGCGATTGCTGTGGGAATCGGG	22	12	A12T	3.53405	-4.23572	-3.38583	-1.83378	-3.61259	-4.48686
M15967	SNP	ATGAAAGCACCAACCCCTTTCT	22	12	G12A	0.555242	2.11755	-0.885011	-1.74194	0.909199	-1.0486
M15968	SNP	ATGAAAGCACCCACCCCTTTCT	22	12	G12C	-1.70522	1.02679	0.0986667	-3.63174	1.34783	-3.90734
M15969	SNP	ATGAAAGCACCTACCCCTTTCT	22	12	G12T	-0.544067	-1.21741	1.55434	-1.37455	-3.8239	-2.98284
M16351	SNP	AGCGAGGTCCGACCCACCGAAG	22	12	T12A	-1.52609	-0.390458	0.90872	-1.42055	-1.34745	-0.329841
M16352	SNP	AGCGAGGTCCGCCCCACCGAAG	22	12	T12C	1.09697	-2.35829	-2.1176	1.14779	0.183465	1.38235
M16353	SNP	AGCGAGGTCCGGCCCACCGAAG	22	12	T12G	0.108043	1.36051	0.619575	1.29794	-0.578022	0.822959
M16675	SNP	GCGGATCACCGATTCCAGTAGC	22	12	C12A	-3.52902	1.21411	-5.61308	-2.30883	-2.49135	-8.34626
M16676	SNP	GCGGATCACCGGTTCCAGTAGC	22	12	C12G	-4.25113	0.615523	-0.995133	4.05058	-4.6638	3.66617
M16677	SNP	GCGGATCACCGTTTCCAGTAGC	22	12	C12T	3.51169	1.91592	-0.211668	0.930094	2.43725	0.838244
M16804	SNP	AAGCCTGTGAAAGCGAGTTAGA	22	12	C12A	0.0275179	-3.84461	3.38463	-0.625456	2.22122	1.1712
M16805	SNP	AAGCCTGTGAAGGCGAGTTAGA	22	12	C12G	3.73813	-4.33753	-1.89188	-3.47172	-4.14636	-3.59042
M16806	SNP	AAGCCTGTGAATGCGAGTTAGA	22	12	C12T	-3.40197	-0.441161	1.53392	-3.2645	-2.26527	0.806078
M17128	SNP	GTGGGAGAAAAATCCACACCAG	22	12	C12A	-6.90638	-4.3713	-2.80045	-6.90638	-4.18012	-3.36344
M17129	SNP	GTGGGAGAAAAGTCCACACCAG	22	12	C12G	-6.867	-5.29787	-5.49383	-5.17304	5.30142	-6.02909
M17130	SNP	GTGGGAGAAAATTCCACACCAG	22	12	C12T	#N/A	#N/A	#N/A	#N/A	#N/A	#N/A
M17257	SNP	AACAGTCTGGGATGCCACTTTA	22	12	T12A	-5.14992	-1.79573	2.14525	-3.45595	-3.98249	-2.58282
M17258	SNP	AACAGTCTGGGCTGCCACTTTA	22	12	T12C	-2.27228	-0.966788	-4.17419	0.748593	-2.29249	-1.64315
M17259	SNP	AACAGTCTGGGGTGCCACTTTA	22	12	T12G	0.649162	0.979673	-0.410519	1.36081	0.966605	-3.66071
M17443	SNP	GTAACGGTTGCATGTTCAGCGA	22	12	T12A	-2.01359	-0.931624	-2.81856	-2.93477	-2.22042	-1.20985
M17444	SNP	GTAACGGTTGCCTGTTCAGCGA	22	12	T12C	1.14534	2.42849	0.751266	-1.24853	0.89088	1.87963
M17445	SNP	GTAACGGTTGCGTGTTCAGCGA	22	12	T12G	0.083695	-4.70769	0.00214715	-3.3029	-3.39667	-3.89374
M15004	SNP	CTCATAGGAAGACACTCTTGAA	22	13	A13C	2.18839	-4.17705	0.575721	0.177526	1.56651	-4.30004
M15005	SNP	CTCATAGGAAGAGACTCTTGAA	22	13	A13G	-2.75961	-0.630263	-0.121508	-0.666491	0.937926	-6.10202
M15006	SNP	CTCATAGGAAGATACTCTTGAA	22	13	A13T	-3.42034	1.4161	4.33325	-1.49688	-2.50597	-1.85308
M15070	SNP	AGCAAGACGGAACCCCGAGGTA	22	13	A13C	0.232917	2.90581	2.39355	2.51124	3.11988	1.1231
M15071	SNP	AGCAAGACGGAAGCCCGAGGTA	22	13	A13G	-1.10265	-2.18364	-1.55516	-4.76527	-1.32207	-2.42002
M15072	SNP	AGCAAGACGGAATCCCGAGGTA	22	13	A13T	1.16127	-0.788264	1.59412	-0.00134617	0.408585	1.54694
M15259	SNP	ACGGATGCTGGTATGTAAAACA	22	13	T13A	-0.0631809	0.752663	1.61357	-1.94619	1.49331	1.40673
M15260	SNP	ACGGATGCTGGTCTGTAAAACA	22	13	T13C	-0.321239	-2.01581	0.0869949	0.813309	1.4558	0.519921
M15261	SNP	ACGGATGCTGGTGTGTAAAACA	22	13	T13G	1.56629	2.51001	-0.148137	-0.0860145	-0.0107323	1.61465
M15574	SNP	ATCTAACTTGATATTAGTACCG	22	13	G13A	1.90379	1.4044	1.1042	3.11677	-2.92026	-2.4416
M15575	SNP	ATCTAACTTGATCTTAGTACCG	22	13	G13C	-0.724775	-1.26929	0.617288	-0.942406	0.00602086	0.897533
M15576	SNP	ATCTAACTTGATTTTAGTACCG	22	13	G13T	1.04533	-1.23931	1.71756	2.63791	0.27009	0.44852
M15640	SNP	ACGTACGGCTCTAATAGGAAGA	22	13	C13A	3.56032	2.50356	-0.587215	-1.45979	-3.29105	1.10399
M15641	SNP	ACGTACGGCTCTGATAGGAAGA	22	13	C13G	2.52943	-1.2733	0.871366	1.00564	-4.50683	1.36746
M15642	SNP	ACGTACGGCTCTTATAGGAAGA	22	13	C13T	-0.54747	-2.60195	-5.71301	0.689451	-2.39655	-3.49454
M15706	SNP	GGCTGTAGCAGGCGCGTGCGTC	22	13	A13C	2.38769	-0.732995	-0.775418	0.964484	-1.44013	-2.24966
M15707	SNP	GGCTGTAGCAGGGGCGTGCGTC	22	13	A13G	-3.09339	-1.80026	-3.73183	-3.9454	-1.4678	-1.36455
M15708	SNP	GGCTGTAGCAGGTGCGTGCGTC	22	13	A13T	-2.94096	-2.86417	1.91496	-3.24255	-1.38548	-1.81935
M15904	SNP	TGCGATTGCTGAAGGAATCGGG	22	13	G13A	-6.01617	-0.0109629	1.86885	-0.477564	-4.19725	0.488783
M15905	SNP	TGCGATTGCTGACGGAATCGGG	22	13	G13C	-8.08154	-5.98094	-6.46108	-6.9413	-5.77929	-6.62927
M15906	SNP	TGCGATTGCTGATGGAATCGGG	22	13	G13T	-2.24484	-4.96478	-3.81776	-3.72518	-3.28525	-4.89834
M15970	SNP	ATGAAAGCACCGCCCCCTTTCT	22	13	A13C	-0.226475	3.3703	0.562893	2.2828	0.856979	1.38099
M15971	SNP	ATGAAAGCACCGGCCCCTTTCT	22	13	A13G	0.188434	1.18932	0.120404	-0.545689	-2.50189	-1.87151
M15972	SNP	ATGAAAGCACCGTCCCCTTTCT	22	13	A13T	-0.764346	-2.97121	1.2796	0.719682	1.98229	1.63823
M16978	SNP	CGAAAGTTTTACGAAGATTCGGT	23	5	C5A	#N/A	#N/A	#N/A	#N/A	#N/A	#N/A
M16979	SNP	CGAAGGTTTTACGAAGATTCGGT	23	5	C5G	#N/A	#N/A	#N/A	#N/A	#N/A	#N/A
M16980	SNP	CGAATGTTTTACGAAGATTCGGT	23	5	C5T	#N/A	#N/A	#N/A	#N/A	#N/A	#N/A
M17488	SNP	CTATAGTTCCGGCGTTACCAAAA	23	5	G5A	-1.57583	2.72995	3.63383	-0.94295	2.22166	4.1954
M17489	SNP	CTATCGTTCCGGCGTTACCAAAA	23	5	G5C	1.10096	0.161671	0.915966	2.23892	1.4784	3.0503
M17490	SNP	CTATTGTTCCGGCGTTACCAAAA	23	5	G5T	1.45496	1.59658	-0.68839	1.22415	1.93987	2.77737
M17557	SNP	GGAGAGGACGAAGGTCTCGTTCT	23	5	G5A	-1.87397	-5.64287	-1.58062	2.49005	-4.70211	-4.38765
M17558	SNP	GGAGCGGACGAAGGTCTCGTTCT	23	5	G5C	-3.06964	-4.84451	1.46296	3.89835	-1.70219	-1.65645
M17559	SNP	GGAGTGGACGAAGGTCTCGTTCT	23	5	G5T	1.56103	3.20589	1.55822	-1.5507	1.23488	2.46696
M17746	SNP	GACTAACCCGTTATTACGTCAGT	23	5	C5A	#N/A	#N/A	#N/A	#N/A	#N/A	#N/A
M17747	SNP	GACTGACCCGTTATTACGTCAGT	23	5	C5G	#N/A	#N/A	#N/A	#N/A	#N/A	#N/A
M17748	SNP	GACTTACCCGTTATTACGTCAGT	23	5	C5T	-3.47799	-4.35933	-4.62484	4.14046	-3.36094	-0.0118188
M14914	SNP	GAGGTACCTGGGCCGAAGCCCGC	23	6	C6A	-4.705	-2.12235	-0.0949049	-3.0212	-3.05283	-2.07588
M14915	SNP	GAGGTGCCTGGGCCGAAGCCCGC	23	6	C6G	1.60748	0.49859	-0.450143	-0.174773	-4.25048	2.75771
M14916	SNP	GAGGTTCCTGGGCCGAAGCCCGC	23	6	C6T	-0.369641	-1.78889	1.02029	2.10913	-2.81364	-1.68295
M15814	SNP	GCACCATTGGAGAACGTGCATTG	23	6	G6A	-8.40247	-4.89686	-5.28967	-4.4428	-3.77752	-8.02286
M15815	SNP	GCACCCTTGGAGAACGTGCATTG	23	6	G6C	#N/A	#N/A	#N/A	#N/A	#N/A	#N/A
M15816	SNP	GCACCTTTGGAGAACGTGCATTG	23	6	G6T	#N/A	#N/A	#N/A	#N/A	#N/A	#N/A
M16015	SNP	GCATCAAAGGTATGGACCATCGA	23	6	T6A	-2.4724	0.755613	1.13434	0.545163	1.79991	2.6661
M16016	SNP	GCATCCAAGGTATGGACCATCGA	23	6	T6C	-3.3589	3.43384	1.43387	-3.31698	1.73278	-0.707195
M16017	SNP	GCATCGAAGGTATGGACCATCGA	23	6	T6G	-1.0624	-1.18908	-5.50298	-6.03021	-5.83559	-1.50545
M16459	SNP	GTCGGAGATTTCACCTCCAGTAT	23	6	T6A	2.72927	2.07105	-2.45307	2.53802	-4.32881	3.0794
M16460	SNP	GTCGGCGATTTCACCTCCAGTAT	23	6	T6C	3.28358	0.0379105	2.65037	0.335312	1.0533	0.52315
M16461	SNP	GTCGGGGATTTCACCTCCAGTAT	23	6	T6G	1.91226	-5.57979	-4.11191	-4.36629	3.15748	0.445534
M16588	SNP	GTTACATACAGGTAGGAGCCAGT	23	6	C6A	1.35415	2.39147	0.692914	-0.71043	0.437173	-0.45216
M16589	SNP	GTTACGTACAGGTAGGAGCCAGT	23	6	C6G	0.596548	2.06285	1.02156	0.381703	0.507542	-1.8919
M16590	SNP	GTTACTTACAGGTAGGAGCCAGT	23	6	C6T	1.43377	-3.58554	-1.04516	-2.02032	-0.140531	1.71509
M16912	SNP	CTCAACTGTGAACCCATTTCCCA	23	6	A6C	0.360348	1.05635	3.13532	-1.03804	-0.00207812	2.77938
M16913	SNP	CTCAAGTGTGAACCCATTTCCCA	23	6	A6G	0.866061	1.83827	0.62929	-0.104957	1.89903	-0.403701
M16914	SNP	CTCAATTGTGAACCCATTTCCCA	23	6	A6T	1.78382	-1.72044	1.06072	2.37806	1.20877	1.40067
M16981	SNP	CGAACATTTTACGAAGATTCGGT	23	6	G6A	-7.68484	-1.52673	-8.64435	-0.489214	1.25979	-3.6927
M16982	SNP	CGAACCTTTTACGAAGATTCGGT	23	6	G6C	-4.32431	-4.28536	-7.92925	1.72319	-4.09418	-3.93172
M16983	SNP	CGAACTTTTTACGAAGATTCGGT	23	6	G6T	#N/A	#N/A	#N/A	#N/A	#N/A	#N/A
M17491	SNP	CTATGATTCCGGCGTTACCAAAA	23	6	G6A	1.09548	2.90755	0.84151	2.69108	1.3348	5.27909
M17492	SNP	CTATGCTTCCGGCGTTACCAAAA	23	6	G6C	0.843637	-0.23014	0.505318	2.46612	-1.72133	0.16514
M17493	SNP	CTATGTTTCCGGCGTTACCAAAA	23	6	G6T	-0.140622	1.77056	1.25625	0.136766	2.84204	1.74766
M17560	SNP	GGAGGAGACGAAGGTCTCGTTCT	23	6	G6A	-2.71336	-2.64779	-4.50521	-2.17682	-2.94695	-3.03182
M17561	SNP	GGAGGCGACGAAGGTCTCGTTCT	23	6	G6C	0.059748	-0.47228	-2.28362	-2.1945	-1.387	-2.91788
M17562	SNP	GGAGGTGACGAAGGTCTCGTTCT	23	6	G6T	2.68775	1.12372	2.12818	-2.57619	0.961163	3.57314
M17749	SNP	GACTCCCCCGTTATTACGTCAGT	23	6	A6C	#N/A	#N/A	#N/A	#N/A	#N/A	#N/A
M17750	SNP	GACTCGCCCGTTATTACGTCAGT	23	6	A6G	-0.767862	-3.09338	-3.62484	-3.44509	-3.60172	0.599616
M17751	SNP	GACTCTCCCGTTATTACGTCAGT	23	6	A6T	#N/A	#N/A	#N/A	#N/A	#N/A	#N/A
M14917	SNP	GAGGTCACTGGGCCGAAGCCCGC	23	7	C7A	0.60735	2.35146	-1.41453	1.52644	-0.101946	-0.136432
M14918	SNP	GAGGTCGCTGGGCCGAAGCCCGC	23	7	C7G	0.205879	1.65221	-0.980207	1.32557	-1.51816	0.594007
M14919	SNP	GAGGTCTCTGGGCCGAAGCCCGC	23	7	C7T	-1.42385	-4.93615	-1.19938	-2.28807	0.194762	-0.554321
M15817	SNP	GCACCGATGGAGAACGTGCATTG	23	7	T7A	#N/A	#N/A	#N/A	#N/A	#N/A	#N/A
M15818	SNP	GCACCGCTGGAGAACGTGCATTG	23	7	T7C	-3.2779	0.755778	0.882609	0.0218461	-4.24537	-1.16849
M15819	SNP	GCACCGGTGGAGAACGTGCATTG	23	7	T7G	-8.56729	0.0322933	-1.62099	-5.51776	1.20191	0.265473
M16018	SNP	GCATCTCAGGTATGGACCATCGA	23	7	A7C	0.468817	0.450168	-0.483678	-8.26289	-1.64854	4.59624
M16019	SNP	GCATCTGAGGTATGGACCATCGA	23	7	A7G	-3.36909	-2.37391	-3.68587	-5.05941	-3.01799	-1.90649
M16020	SNP	GCATCTTAGGTATGGACCATCGA	23	7	A7T	-3.37525	-1.78084	-4.51451	2.66613	-2.71899	-0.579112
M16462	SNP	GTCGGTAATTTCACCTCCAGTAT	23	7	G7A	5.47052	-2.02953	2.16184	-0.548706	-2.81336	1.83522
M16463	SNP	GTCGGTCATTTCACCTCCAGTAT	23	7	G7C	-0.412857	-3.54073	1.29504	-2.93475	0.683079	1.87235
M16464	SNP	GTCGGTTATTTCACCTCCAGTAT	23	7	G7T	-4.70072	-3.31141	5.63616	-3.65887	-3.26858	-1.1619
M16591	SNP	GTTACCAACAGGTAGGAGCCAGT	23	7	T7A	-1.22753	-2.87972	2.22592	2.34666	0.95395	1.02497
M16592	SNP	GTTACCCACAGGTAGGAGCCAGT	23	7	T7C	0.688598	-3.07584	-1.02871	0.872556	-0.416879	0.359284
M16593	SNP	GTTACCGACAGGTAGGAGCCAGT	23	7	T7G	0.783837	-4.38209	-1.65122	-3.92439	5.48134	-3.73869
M16915	SNP	CTCAAAAGTGAACCCATTTCCCA	23	7	T7A	1.26986	1.37459	1.626	1.68559	2.14134	1.94272
M16916	SNP	CTCAAACGTGAACCCATTTCCCA	23	7	T7C	0.950059	-1.70998	0.494907	-0.650534	-4.55296	-2.20521
M16917	SNP	CTCAAAGGTGAACCCATTTCCCA	23	7	T7G	0.496605	-0.293019	-0.608654	0.600521	-1.73687	2.51485
M16984	SNP	CGAACGATTTACGAAGATTCGGT	23	7	T7A	#N/A	#N/A	#N/A	#N/A	#N/A	#N/A
M16985	SNP	CGAACGCTTTACGAAGATTCGGT	23	7	T7C	0.863962	-1.1801	0.893914	-7.29471	-4.53353	-2.40827
M16986	SNP	CGAACGGTTTACGAAGATTCGGT	23	7	T7G	-8.86149	-5.95667	0.372744	-8.86149	-5.76549	-3.37168
M17494	SNP	CTATGGATCCGGCGTTACCAAAA	23	7	T7A	0.868718	0.735261	0.557208	1.31578	2.71114	1.00186
M17495	SNP	CTATGGCTCCGGCGTTACCAAAA	23	7	T7C	-2.43093	-3.60091	-1.09656	1.1921	1.86856	3.28945
M17496	SNP	CTATGGGTCCGGCGTTACCAAAA	23	7	T7G	-0.211585	1.06162	1.43274	1.20202	2.4273	-0.436393
M17563	SNP	GGAGGGAACGAAGGTCTCGTTCT	23	7	G7A	0.760654	0.629924	1.10691	1.46396	0.290368	1.22274
M17564	SNP	GGAGGGCACGAAGGTCTCGTTCT	23	7	G7C	-1.18935	-4.70333	-1.78542	2.17748	1.13566	-3.11246
M17565	SNP	GGAGGGTACGAAGGTCTCGTTCT	23	7	G7T	1.40299	0.314269	0.931246	-3.4566	-0.680606	-2.17035
M16522	SNP	CCAAGATGACCCACTTCGCT	20	4	C4A	-0.107197	0.331766	0.493666	3.66286	-1.83722	1.7991
M16523	SNP	CCAGGATGACCCACTTCGCT	20	4	C4G	-0.114019	-0.296726	0.914037	0.870436	-0.182733	-1.35755
M16524	SNP	CCATGATGACCCACTTCGCT	20	4	C4T	-1.10402	1.55786	0.973472	0.071238	1.37361	0.158063
M16846	SNP	CGCCACGTTCTGCGGCACTT	20	4	A4C	-5.01897	0.0992919	1.59165	-2.02508	-4.5178	-0.28545
M16847	SNP	CGCGACGTTCTGCGGCACTT	20	4	A4G	-0.00928267	-0.717801	0.749986	-0.513992	2.61813	-0.418159
M16848	SNP	CGCTACGTTCTGCGGCACTT	20	4	A4T	-1.36208	0.64478	0.953048	1.87282	-5.77166	-1.21963
M17044	SNP	ACGCCCGGGAGTCCAGTTCG	20	4	A4C	-0.137786	0.576138	-1.13678	-1.4339	-3.16892	3.15591
M17045	SNP	ACGGCCGGGAGTCCAGTTCG	20	4	A4G	-0.555976	-1.0114	0.885553	-3.65461	-3.44011	-1.46096
M17046	SNP	ACGTCCGGGAGTCCAGTTCG	20	4	A4T	-3.57705	-3.7249	-3.15224	-4.03148	-3.5195	-1.49066
M17299	SNP	AGAAAAAGATCGCGAGGAAG	20	4	G4A	2.92017	0.9831	2.66057	2.41091	2.56524	2.56362
M17300	SNP	AGACAAAGATCGCGAGGAAG	20	4	G4C	0.0301901	1.62476	2.7919	1.4079	0.569862	0.441908
M17301	SNP	AGATAAAGATCGCGAGGAAG	20	4	G4T	2.53455	0.826359	1.73224	2.17766	-0.556611	3.11371
M17359	SNP	GTAAGGAGCGTCAACGCTTA	20	4	G4A	-0.844699	0.470338	-1.43831	4.56232	0.831262	-1.27521
M17360	SNP	GTACGGAGCGTCAACGCTTA	20	4	G4C	-3.60778	-0.888105	-2.07792	-3.91839	-2.8257	-1.67686
M17361	SNP	GTATGGAGCGTCAACGCTTA	20	4	G4T	-0.832464	2.26248	-1.70639	0.0154066	0.873475	0.300808
M17623	SNP	ACTATACGTACGCGCCAGTT	20	4	T4A	1.36297	-4.92821	0.907769	2.73034	-2.5031	1.30679
M17624	SNP	ACTCTACGTACGCGCCAGTT	20	4	T4C	2.21201	3.2671	1.01515	-0.441211	-1.16459	2.49443
M17625	SNP	ACTGTACGTACGCGCCAGTT	20	4	T4G	1.07793	-1.26385	-0.472787	-0.670219	1.86453	0.7662
M17683	SNP	GAAAAGATTGTCAACAGGTT	20	4	G4A	-0.0298792	0.482736	3.02988	0.325923	-2.10942	2.09038
M17684	SNP	GAACAGATTGTCAACAGGTT	20	4	G4C	-0.550203	1.87385	2.03923	0.829398	1.73448	0.769422
M17685	SNP	GAATAGATTGTCAACAGGTT	20	4	G4T	2.84274	0.303515	1.69439	1.41125	2.0548	1.16183
M17938	SNP	CAGAATGGAACCACGCTATG	20	4	T4A	-1.79962	-1.13467	-2.85092	-0.794212	-0.745349	0.0657372
M17939	SNP	CAGCATGGAACCACGCTATG	20	4	T4C	#N/A	#N/A	#N/A	#N/A	#N/A	#N/A
M17940	SNP	CAGGATGGAACCACGCTATG	20	4	T4G	-5.02221	-1.39509	-0.107269	-1.11847	2.33175	1.59725
M15175	SNP	AGTAAGGAACCACGCTATGT	20	5	T5A	-1.40367	2.60838	4.16869	-0.384931	-4.71428	-4.14276
M15176	SNP	AGTACGGAACCACGCTATGT	20	5	T5C	-2.43159	-2.43457	-0.374971	3.67943	-2.48375	-2.78157
M15177	SNP	AGTAGGGAACCACGCTATGT	20	5	T5G	-1.26534	1.88539	-1.76335	-0.964616	-0.706639	1.62127
M15427	SNP	CCTGACGGCCACGTGTTTTG	20	5	C5A	0.877992	0.284849	0.968688	0.246127	1.17897	1.81405
M15428	SNP	CCTGGCGGCCACGTGTTTTG	20	5	C5G	0.529171	0.683712	0.47726	0.0661443	2.05756	2.04303
M15429	SNP	CCTGTCGGCCACGTGTTTTG	20	5	C5T	1.48842	0.706491	0.349284	1.29948	1.18226	2.16129
M16081	SNP	ATGCAGGAGTTTGCTGCGAT	20	5	C5A	-3.1865	-1.58176	-3.63215	1.54727	-1.16371	-3.92201
M16082	SNP	ATGCGGGAGTTTGCTGCGAT	20	5	C5G	-0.265345	2.40661	1.43987	-5.6628	-2.31112	2.66418
M16083	SNP	ATGCTGGAGTTTGCTGCGAT	20	5	C5T	2.48213	1.49621	3.13928	0.487879	0.408849	-1.89982
M16396	SNP	CGGAATGTACCCCTCGATGC	20	5	T5A	-0.554369	-2.55229	2.38517	0.977643	3.03327	-0.342276
M16397	SNP	CGGACTGTACCCCTCGATGC	20	5	T5C	-1.4152	-1.48009	-1.03233	-0.618991	-1.05204	0.507384
M16398	SNP	CGGAGTGTACCCCTCGATGC	20	5	T5G	-0.0348211	-0.949791	-0.187769	-2.82074	1.97881	1.60098
M16525	SNP	CCACAATGACCCACTTCGCT	20	5	G5A	1.16216	-0.294524	1.60448	0.497734	1.37522	1.20239
M16526	SNP	CCACCATGACCCACTTCGCT	20	5	G5C	0.511473	-0.894903	3.40956	1.90451	-0.308556	1.27928
M16527	SNP	CCACTATGACCCACTTCGCT	20	5	G5T	1.23083	-0.466808	0.564823	0.550126	3.33683	0.9314
M16849	SNP	CGCACCGTTCTGCGGCACTT	20	5	A5C	0.737024	-0.624254	-0.217834	-0.128101	1.18025	-2.07161
M16850	SNP	CGCAGCGTTCTGCGGCACTT	20	5	A5G	0.59724	0.0293969	-3.191	-0.633409	0.479428	-2.42524
M16851	SNP	CGCATCGTTCTGCGGCACTT	20	5	A5T	0.465063	0.980334	0.510551	-1.03238	0.156193	2.29471
M17047	SNP	ACGAACGGGAGTCCAGTTCG	20	5	C5A	2.40476	-2.58834	-5.71014	-1.18208	-3.31485	-2.625
M17048	SNP	ACGAGCGGGAGTCCAGTTCG	20	5	C5G	2.60957	0.596398	-0.840242	-3.76563	-1.53964	1.1062
M17049	SNP	ACGATCGGGAGTCCAGTTCG	20	5	C5T	-1.3323	-3.06841	-2.32417	-2.81673	-2.48255	-2.98809
M17302	SNP	AGAGCAAGATCGCGAGGAAG	20	5	A5C	0.109681	2.92954	1.73861	-1.79441	-0.846093	1.68882
M17303	SNP	AGAGGAAGATCGCGAGGAAG	20	5	A5G	2.20554	1.70854	1.16411	0.0713755	0.73803	1.93311
M17304	SNP	AGAGTAAGATCGCGAGGAAG	20	5	A5T	1.98007	4.49916	1.87397	0.441847	-0.437945	-0.527871
M17362	SNP	GTAGAGAGCGTCAACGCTTA	20	5	G5A	-0.210077	-1.88389	3.84456	-1.97963	1.80854	1.97644
M17363	SNP	GTAGCGAGCGTCAACGCTTA	20	5	G5C	-1.25332	-4.22982	-3.64413	-2.56562	-2.87372	-2.92842
M17364	SNP	GTAGTGAGCGTCAACGCTTA	20	5	G5T	-2.51145	-3.06383	-3.37307	-3.02973	1.0681	-2.50623
M17626	SNP	ACTTAACGTACGCGCCAGTT	20	5	T5A	-0.503514	-0.363338	0.649654	1.03033	-1.03327	0.542959
M17627	SNP	ACTTCACGTACGCGCCAGTT	20	5	T5C	-5.06946	-3.17668	1.17141	-4.81428	-3.54252	-5.34132
M17628	SNP	ACTTGACGTACGCGCCAGTT	20	5	T5G	-2.66019	-0.64445	-0.743935	-1.40715	0.65998	-3.6592
M17686	SNP	GAAGCGATTGTCAACAGGTT	20	5	A5C	1.40545	0.503692	0.651048	-0.419097	-0.146506	-0.589988
M17687	SNP	GAAGGGATTGTCAACAGGTT	20	5	A5G	2.03939	1.89719	2.23008	2.00508	0.559693	2.15618
M17688	SNP	GAAGTGATTGTCAACAGGTT	20	5	A5T	1.98802	1.60669	0.889267	0.223902	0.6777	-0.111059
M17941	SNP	CAGTCTGGAACCACGCTATG	20	5	A5C	-0.257352	-0.672815	3.03362	-0.554088	0.458357	-4.70613
M17942	SNP	CAGTGTGGAACCACGCTATG	20	5	A5G	1.81337	-3.54999	-3.50245	1.42011	-3.52961	-0.762757
M17943	SNP	CAGTTTGGAACCACGCTATG	20	5	A5T	-1.99559	0.042265	0.354778	-3.26981	-0.912372	1.66019
M16276	SNP	CCGGCGTAAGCCACTCCGAAG	21	8	T8A	1.16503	-4.85361	-0.0301699	3.02802	-1.49517	-2.76932
M16277	SNP	CCGGCGTCAGCCACTCCGAAG	21	8	T8C	-1.15156	-0.797964	0.419431	-0.135412	0.506174	1.79129
M16278	SNP	CCGGCGTGAGCCACTCCGAAG	21	8	T8G	1.0488	0.134528	-3.25837	0.0610602	1.43927	0.654735
M16729	SNP	ACCAACGAATTTGAGCCGGCG	21	8	G8A	1.03783	-0.951612	-0.66935	-1.52759	-4.2519	-0.191525
M16730	SNP	ACCAACGCATTTGAGCCGGCG	21	8	G8C	0.577927	0.154215	1.33727	0.980748	-0.704961	-1.65422
M16731	SNP	ACCAACGTATTTGAGCCGGCG	21	8	G8T	1.17239	-1.26524	0.828499	0.659815	2.04472	-1.18815
M17182	SNP	GCTTCCAATAGCGACAGAAGC	21	8	G8A	3.7405	-4.7377	-3.86225	-7.2212	-4.54653	-3.51029
M17183	SNP	GCTTCCACTAGCGACAGAAGC	21	8	G8C	#N/A	#N/A	#N/A	#N/A	#N/A	#N/A
M17184	SNP	GCTTCCATTAGCGACAGAAGC	21	8	G8T	#N/A	#N/A	#N/A	#N/A	#N/A	#N/A
M17824	SNP	CAGGCTCATTACAGGCAGCCC	21	8	C8A	-3.95873	-5.43518	0.783824	-1.53056	-3.95649	-3.01385
M17825	SNP	CAGGCTCGTTACAGGCAGCCC	21	8	C8G	2.57627	-1.46647	-1.78631	1.03827	-5.23996	-5.1926
M17826	SNP	CAGGCTCTTTACAGGCAGCCC	21	8	C8T	#N/A	#N/A	#N/A	#N/A	#N/A	#N/A
M17887	SNP	TTGAGCAAGACCCCGAAAGGG	21	8	G8A	1.93618	0.998445	3.55301	-0.124839	0.440378	-0.0129077
M17888	SNP	TTGAGCACGACCCCGAAAGGG	21	8	G8C	0.958367	1.16514	1.53828	1.01151	-1.05687	2.30828
M17889	SNP	TTGAGCATGACCCCGAAAGGG	21	8	G8T	1.44709	1.22161	1.53787	0.662258	0.889408	1.07139
M18010	SNP	GAAGAGAATGTCAACAGGTTT	21	8	T8A	1.18516	-2.4833	1.03148	1.00592	3.22763	-0.678752
M18011	SNP	GAAGAGACTGTCAACAGGTTT	21	8	T8C	0.0799077	-0.304683	-0.868182	-2.19878	2.06123	0.619264
M18012	SNP	GAAGAGAGTGTCAACAGGTTT	21	8	T8G	0.815755	0.490532	0.616642	0.968413	0.57011	1.69408
M18073	SNP	TAGCCATAGTAGCGTCTCGCT	21	8	G8A	3.18147	-0.976944	0.489618	-3.15576	-4.12141	-3.68307
M18074	SNP	TAGCCATCGTAGCGTCTCGCT	21	8	G8C	-0.564248	-0.851732	-3.57835	0.463703	0.963196	-0.393099
M18075	SNP	TAGCCATTGTAGCGTCTCGCT	21	8	G8T	-0.0865702	1.42454	0.399582	-3.83523	0.660397	0.147306
M15124	SNP	TTAGAGCTAATCCATTCAGCG	21	9	G9A	2.85803	3.23033	0.436722	3.46271	4.20102	2.95823
M15125	SNP	TTAGAGCTCATCCATTCAGCG	21	9	G9C	1.9439	-1.47975	3.79469	3.10022	2.39621	0.684952
M15126	SNP	TTAGAGCTTATCCATTCAGCG	21	9	G9T	4.08595	0.0114339	2.43069	3.04297	3.36416	1.58024
M15313	SNP	GCTAACGCCTCTAAGGTATGG	21	9	A9C	2.7507	1.40124	1.42363	1.95327	2.69715	2.19401
M15314	SNP	GCTAACGCGTCTAAGGTATGG	21	9	A9G	1.47645	-0.214913	1.82935	1.15726	2.50563	1.55605
M15315	SNP	GCTAACGCTTCTAAGGTATGG	21	9	A9T	1.52494	3.94046	3.2146	2.98702	3.55209	1.01041
M15376	SNP	ACGGTTGCATGTTCAGCGAAC	21	9	T9A	-1.76377	-6.69704	-2.49395	-6.81041	-5.57771	-4.38639
M15377	SNP	ACGGTTGCCTGTTCAGCGAAC	21	9	T9C	2.02283	-1.85103	1.01159	1.99259	-4.20493	-0.828744
M15378	SNP	ACGGTTGCGTGTTCAGCGAAC	21	9	T9G	-4.78096	-7.70158	-6.90738	-4.55085	-7.70158	2.68525
M15499	SNP	CGTCGCGAATTGTGAGGCTGT	21	9	G9A	1.27694	-0.480936	-0.445778	-1.65384	-4.1175	0.327991
M15500	SNP	CGTCGCGACTTGTGAGGCTGT	21	9	G9C	2.12219	0.473167	-1.39331	-1.08123	-1.07873	1.81328
M15501	SNP	CGTCGCGATTTGTGAGGCTGT	21	9	G9T	0.657453	-2.4229	-1.90702	-0.997082	1.26024	1.04647
M15760	SNP	CTCGCGAACGAGCCCGGACAC	21	9	A9C	-1.84275	0.309964	-0.749759	0.463645	1.26632	-2.40882
M15761	SNP	CTCGCGAAGGAGCCCGGACAC	21	9	A9G	0.354113	-2.57596	-1.7535	-1.33734	1.34247	-0.754908
M15762	SNP	CTCGCGAATGAGCCCGGACAC	21	9	A9T	-4.09044	-0.722076	-4.95457	-3.43916	-3.11244	-3.59931
M16153	SNP	GAGGGAGACGCCGAAACCGGC	21	9	A9C	-0.401631	-4.29965	-3.45566	0.868408	-0.616352	-3.05215
M16154	SNP	GAGGGAGAGGCCGAAACCGGC	21	9	A9G	1.97095	-0.818302	2.65616	0.0982573	4.01769	2.69689
M16155	SNP	GAGGGAGATGCCGAAACCGGC	21	9	A9T	-0.0439434	1.30652	-0.837649	3.68764	0.768898	2.13722
M16216	SNP	CCACGGTACAAGTGCGCGCCG	21	9	A9C	-0.335338	1.35185	0.0104889	-1.06128	-0.196117	0.106461
M16217	SNP	CCACGGTAGAAGTGCGCGCCG	21	9	A9G	-1.08413	0.385645	-0.433273	-0.875826	-2.10127	2.0148
M16218	SNP	CCACGGTATAAGTGCGCGCCG	21	9	A9T	-0.396482	-1.40686	-0.42645	0.124803	1.34691	-1.19282
M16279	SNP	CCGGCGTTCGCCACTCCGAAG	21	9	A9C	0.41743	0.954354	0.0575921	-1.69836	-4.16344	-5.48416
M16280	SNP	CCGGCGTTGGCCACTCCGAAG	21	9	A9G	0.0243916	0.443446	0.785275	-0.111814	1.52076	1.29263
M16281	SNP	CCGGCGTTTGCCACTCCGAAG	21	9	A9T	1.3539	-4.88555	-1.32638	0.684643	2.82962	-0.70642
M16732	SNP	ACCAACGGCTTTGAGCCGGCG	21	9	A9C	-3.34526	-8.02212	-1.10862	-3.48925	-3.7304	2.5214
M16733	SNP	ACCAACGGGTTTGAGCCGGCG	21	9	A9G	-0.957143	-4.28538	-0.908423	-3.65753	-4.07509	-4.3228
M16734	SNP	ACCAACGGTTTTGAGCCGGCG	21	9	A9T	-0.809917	-2.33285	-3.2005	2.98437	-2.84872	-3.78157
M17185	SNP	GCTTCCAGAAGCGACAGAAGC	21	9	T9A	1.50565	0.083678	1.68263	-0.940214	-0.931562	-2.60196
M17186	SNP	GCTTCCAGCAGCGACAGAAGC	21	9	T9C	-1.05345	-5.31086	-1.32499	1.0259	0.141675	1.51741
M17187	SNP	GCTTCCAGGAGCGACAGAAGC	21	9	T9G	-3.79747	-2.78051	-1.45044	1.6502	2.54844	-2.12355
M17827	SNP	CAGGCTCCATACAGGCAGCCC	21	9	T9A	-6.26782	-7.09752	-3.93027	-6.26782	-7.09752	-2.11138
M17828	SNP	CAGGCTCCCTACAGGCAGCCC	21	9	T9C	-5.21575	-9.03129	-1.03062	-2.14678	-4.17937	-4.04225
M17829	SNP	CAGGCTCCGTACAGGCAGCCC	21	9	T9G	-3.54847	-4.92857	1.31922	-0.56018	-4.00632	1.20582
M17890	SNP	TTGAGCAGAACCCCGAAAGGG	21	9	G9A	1.97032	0.325797	0.451311	2.05142	0.520252	0.048174
M17891	SNP	TTGAGCAGCACCCCGAAAGGG	21	9	G9C	1.6149	0.00651809	1.70402	0.531319	-0.177559	0.321158
M17892	SNP	TTGAGCAGTACCCCGAAAGGG	21	9	G9T	0.783632	2.00238	1.90321	0.386485	1.66511	0.660403
M18013	SNP	GAAGAGATAGTCAACAGGTTT	21	9	T9A	-0.674051	2.52542	1.35778	0.724384	0.269232	1.33615
M18014	SNP	GAAGAGATCGTCAACAGGTTT	21	9	T9C	0.54405	1.42232	-0.230959	2.6659	0.0492385	1.0575
M18015	SNP	GAAGAGATGGTCAACAGGTTT	21	9	T9G	-1.19363	1.19374	-0.512457	-1.54858	0.320461	-0.43005
M18076	SNP	TAGCCATGATAGCGTCTCGCT	21	9	G9A	-2.62564	-3.7841	-1.44475	3.63724	-3.4788	3.4601
M18077	SNP	TAGCCATGCTAGCGTCTCGCT	21	9	G9C	0.326804	1.72068	1.22711	-0.748076	2.63831	0.850482
M18078	SNP	TAGCCATGTTAGCGTCTCGCT	21	9	G9T	-1.33989	-3.0971	-0.584997	3.67493	-3.01926	-0.568855
M15127	SNP	TTAGAGCTGCTCCATTCAGCG	21	10	A10C	-0.0695819	-0.568204	3.14962	-0.23225	1.98955	3.39647
M15128	SNP	TTAGAGCTGGTCCATTCAGCG	21	10	A10G	3.02947	1.58651	0.780312	-0.417282	-2.9652	3.98299
M15129	SNP	TTAGAGCTGTTCCATTCAGCG	21	10	A10T	0.960106	1.17927	-1.52263	-6.10639	-3.83112	-3.38447
M15316	SNP	GCTAACGCAACTAAGGTATGG	21	10	T10A	-0.737666	1.2704	-0.875977	1.8972	0.371592	1.44107
M15317	SNP	GCTAACGCACCTAAGGTATGG	21	10	T10C	0.524009	4.0919	-1.13581	1.11062	0.305599	0.639661
M15318	SNP	GCTAACGCAGCTAAGGTATGG	21	10	T10G	1.78176	0.686717	1.39477	-2.26226	0.252212	-0.70413
M15379	SNP	ACGGTTGCTAGTTCAGCGAAC	21	10	T10A	2.63815	-4.66509	-4.76747	0.816468	-3.74285	-5.84806
M15380	SNP	ACGGTTGCTCGTTCAGCGAAC	21	10	T10C	1.69848	-3.31933	2.31186	1.21781	0.568857	-3.98862
M15381	SNP	ACGGTTGCTGGTTCAGCGAAC	21	10	T10G	-6.32661	-0.622595	-2.63018	-6.0965	-4.66007	0.201004
M15502	SNP	CGTCGCGAGATGTGAGGCTGT	21	10	T10A	0.387181	-1.67944	-0.104874	-0.338709	0.171763	-0.810864
M15503	SNP	CGTCGCGAGCTGTGAGGCTGT	21	10	T10C	0.978639	0.950025	0.461855	-0.365467	-0.00391748	1.45231
M15504	SNP	CGTCGCGAGGTGTGAGGCTGT	21	10	T10G	-0.490606	0.08619	-0.596438	-0.922946	0.000884578	0.234725
M15763	SNP	CTCGCGAAAAAGCCCGGACAC	21	10	G10A	-0.75831	-1.00556	-1.80722	-0.740294	1.90954	-1.48924
M15764	SNP	CTCGCGAAACAGCCCGGACAC	21	10	G10C	-0.864793	0.266697	-0.00966023	-1.35873	0.103854	-1.90528
M15765	SNP	CTCGCGAAATAGCCCGGACAC	21	10	G10T	-3.36823	1.24914	0.0530283	0.370578	-2.62955	-0.342866
M16156	SNP	GAGGGAGAAACCGAAACCGGC	21	10	G10A	2.2641	1.15253	1.50881	-1.0953	3.26676	-1.28407
M16157	SNP	GAGGGAGAACCCGAAACCGGC	21	10	G10C	#N/A	#N/A	#N/A	#N/A	#N/A	#N/A
M16158	SNP	GAGGGAGAATCCGAAACCGGC	21	10	G10T	0.625963	1.14587	-0.345547	-4.48971	3.80147	-0.325796
M16219	SNP	CCACGGTAACAGTGCGCGCCG	21	10	A10C	0.324262	-1.31321	0.464116	-0.789964	1.47766	-1.4216
M16220	SNP	CCACGGTAAGAGTGCGCGCCG	21	10	A10G	-0.695563	-0.189663	-1.81821	-1.95686	-1.24695	1.46949
M16221	SNP	CCACGGTAATAGTGCGCGCCG	21	10	A10T	0.133145	-1.49873	0.810937	0.76788	-0.134809	0.666598
M16282	SNP	CCGGCGTTAACCACTCCGAAG	21	10	G10A	2.22103	-1.4844	-1.40679	0.436628	0.914559	1.77554
M16283	SNP	CCGGCGTTACCCACTCCGAAG	21	10	G10C	-3.80216	-2.37261	-4.89906	-2.25409	-0.781463	1.96945
M16284	SNP	CCGGCGTTATCCACTCCGAAG	21	10	G10T	#N/A	#N/A	#N/A	#N/A	#N/A	#N/A
M16735	SNP	ACCAACGGAATTGAGCCGGCG	21	10	T10A	#N/A	#N/A	#N/A	#N/A	#N/A	#N/A
M16736	SNP	ACCAACGGACTTGAGCCGGCG	21	10	T10C	3.1297	0.855276	-4.53536	5.92277	-0.897876	-0.938638
M16737	SNP	ACCAACGGAGTTGAGCCGGCG	21	10	T10G	0.889584	-0.919464	-2.37039	2.65906	-0.698316	0.664214
M17188	SNP	GCTTCCAGTCGCGACAGAAGC	21	10	A10C	-0.0821122	-5.0536	1.13604	-0.728802	-4.8482	1.2716
M17189	SNP	GCTTCCAGTGGCGACAGAAGC	21	10	A10G	-2.28227	-8.05761	-1.5846	3.3681	-3.76589	-4.10099
M17190	SNP	GCTTCCAGTTGCGACAGAAGC	21	10	A10T	-5.9091	-8.7924	-8.39709	-1.33255	-2.38922	1.22324
M17830	SNP	CAGGCTCCTAACAGGCAGCCC	21	10	T10A	#N/A	#N/A	#N/A	#N/A	#N/A	#N/A
M17831	SNP	CAGGCTCCTCACAGGCAGCCC	21	10	T10C	#N/A	#N/A	#N/A	#N/A	#N/A	#N/A
M17832	SNP	CAGGCTCCTGACAGGCAGCCC	21	10	T10G	-3.44076	-1.60582	-4.35571	-8.09813	-4.58485	-3.96937
M17893	SNP	TTGAGCAGGCCCCCGAAAGGG	21	10	A10C	1.3053	0.276097	0.845252	1.40767	2.55977	1.46449
M17894	SNP	TTGAGCAGGGCCCCGAAAGGG	21	10	A10G	0.571674	1.46486	1.38713	1.39629	1.60842	1.85705
M17895	SNP	TTGAGCAGGTCCCCGAAAGGG	21	10	A10T	0.957733	1.51308	1.64158	1.40494	0.64622	2.81907
M18016	SNP	GAAGAGATTATCAACAGGTTT	21	10	G10A	1.31915	1.49081	0.225608	0.247681	1.87456	2.29441
M18017	SNP	GAAGAGATTCTCAACAGGTTT	21	10	G10C	-0.494808	2.46288	0.851421	2.35553	1.4252	1.4439
M18018	SNP	GAAGAGATTTTCAACAGGTTT	21	10	G10T	2.61444	1.87939	1.29275	2.16758	0.52756	-0.607406
M18079	SNP	TAGCCATGGAAGCGTCTCGCT	21	10	T10A	0.827319	-0.503038	2.08309	1.04605	-4.21912	1.40776
M18080	SNP	TAGCCATGGCAGCGTCTCGCT	21	10	T10C	-1.98339	1.07517	0.683395	-1.59693	-2.22371	-0.553951
M18081	SNP	TAGCCATGGGAGCGTCTCGCT	21	10	T10G	-1.33019	-2.07108	-1.93771	-1.4031	-0.761429	-3.30532
M15130	SNP	TTAGAGCTGAACCATTCAGCG	21	11	T11A	-4.51027	-2.30667	1.36258	0.536352	-3.89038	2.85814
M15131	SNP	TTAGAGCTGACCCATTCAGCG	21	11	T11C	-1.80851	-0.36004	-0.41913	-3.52415	-3.81919	-3.33259
M15132	SNP	TTAGAGCTGAGCCATTCAGCG	21	11	T11G	1.61319	-0.921773	-6.24076	3.81192	-2.68134	-2.3545
M15319	SNP	GCTAACGCATATAAGGTATGG	21	11	C11A	1.17196	2.25755	2.0049	1.9229	-0.159692	3.81556
M15320	SNP	GCTAACGCATGTAAGGTATGG	21	11	C11G	2.24579	0.533175	1.40434	3.5851	0.250965	2.95302
M15321	SNP	GCTAACGCATTTAAGGTATGG	21	11	C11T	2.54723	1.93067	2.4089	2.90991	2.81147	-0.316273
M15382	SNP	ACGGTTGCTTATTCAGCGAAC	21	11	G11A	-4.39108	-3.32173	3.31177	0.157675	-3.68475	-2.61048
M15383	SNP	ACGGTTGCTTCTTCAGCGAAC	21	11	G11C	0.323528	-3.9558	-8.46538	-3.75985	-4.68231	-5.38023
M15384	SNP	ACGGTTGCTTTTTCAGCGAAC	21	11	G11T	4.31225	-5.72167	0.364809	2.34657	-3.63965	-2.79847
M15505	SNP	CGTCGCGAGTAGTGAGGCTGT	21	11	T11A	-0.522451	1.08554	0.45666	0.228105	-2.40063	-0.440152
M15506	SNP	CGTCGCGAGTCGTGAGGCTGT	21	11	T11C	-0.961831	-2.46986	-2.75991	0.757632	-1.72554	-0.935357
M15507	SNP	CGTCGCGAGTGGTGAGGCTGT	21	11	T11G	-2.18497	-1.26174	-1.13345	-2.25486	-1.73895	-0.291207
M15766	SNP	CTCGCGAAAGCGCCCGGACAC	21	11	A11C	-0.907639	-2.90475	-0.941866	0.918716	1.85261	-1.21949
M15767	SNP	CTCGCGAAAGGGCCCGGACAC	21	11	A11G	-0.573373	-0.299654	0.466199	-0.372602	-0.154374	0.95264
M15768	SNP	CTCGCGAAAGTGCCCGGACAC	21	11	A11T	0.318095	0.91801	-1.1927	2.58226	-2.44325	2.51715
M16159	SNP	GAGGGAGAAGACGAAACCGGC	21	11	C11A	-0.588303	2.83526	0.0189581	0.281089	0.589383	2.36949
M16160	SNP	GAGGGAGAAGGCGAAACCGGC	21	11	C11G	1.28526	-2.17694	1.0034	0.473682	1.68964	2.94198
M16161	SNP	GAGGGAGAAGTCGAAACCGGC	21	11	C11T	1.03017	1.97036	2.05918	-0.854382	2.36587	3.66223
M16222	SNP	CCACGGTAAACGTGCGCGCCG	21	11	A11C	-1.80449	-0.581115	-0.588054	-0.152311	-1.06629	-1.50699
M16223	SNP	CCACGGTAAAGGTGCGCGCCG	21	11	A11G	-0.980417	-0.323774	-1.30646	-0.597615	0.242997	0.469334
M16224	SNP	CCACGGTAAATGTGCGCGCCG	21	11	A11T	0.0353399	-2.26191	0.852269	0.765973	0.126782	1.09597
M16285	SNP	CCGGCGTTAGACACTCCGAAG	21	11	C11A	1.70767	-4.33703	-3.13886	1.53396	2.91298	1.66611
M16286	SNP	CCGGCGTTAGGCACTCCGAAG	21	11	C11G	0.342863	-2.24616	-0.0576974	-0.111261	-1.25124	2.24645
M16287	SNP	CCGGCGTTAGTCACTCCGAAG	21	11	C11T	-3.45872	1.07168	0.0596899	0.248899	-3.22436	1.47408
M16738	SNP	ACCAACGGATATGAGCCGGCG	21	11	T11A	-6.92965	4.67639	-1.09999	3.74242	-1.79691	-3.64153
M16739	SNP	ACCAACGGATCTGAGCCGGCG	21	11	T11C	2.04589	-4.89136	0.377007	0.395387	0.88874	-2.07683
M16740	SNP	ACCAACGGATGTGAGCCGGCG	21	11	T11G	-3.91233	-0.7081	2.97052	4.51428	-4.85092	2.62183
M17191	SNP	GCTTCCAGTAACGACAGAAGC	21	11	G11A	#N/A	#N/A	#N/A	#N/A	#N/A	#N/A
M17192	SNP	GCTTCCAGTACCGACAGAAGC	21	11	G11C	-7.44759	-8.02212	-0.490875	1.32642	-4.65856	-7.45992
M17193	SNP	GCTTCCAGTATCGACAGAAGC	21	11	G11T	#N/A	#N/A	#N/A	#N/A	#N/A	#N/A
M17833	SNP	CAGGCTCCTTCCAGGCAGCCC	21	11	A11C	-7.72529	-4.75059	-8.84074	-7.72529	-4.55942	-0.976084
M17834	SNP	CAGGCTCCTTGCAGGCAGCCC	21	11	A11G	-3.19295	-2.06912	-4.30805	-3.85685	-0.872588	-3.0437
M17835	SNP	CAGGCTCCTTTCAGGCAGCCC	21	11	A11T	-4.71777	-1.68247	1.28225	1.03665	-0.618585	-6.61116
M17896	SNP	TTGAGCAGGAACCCGAAAGGG	21	11	C11A	1.42149	0.947412	1.79898	1.84702	-0.237884	0.966917
M17897	SNP	TTGAGCAGGAGCCCGAAAGGG	21	11	C11G	0.786653	2.24125	2.20101	0.803157	2.5143	1.62992
M17898	SNP	TTGAGCAGGATCCCGAAAGGG	21	11	C11T	1.65287	1.1024	1.01284	1.83668	1.47113	2.12985
M18019	SNP	GAAGAGATTGACAACAGGTTT	21	11	T11A	-0.536427	-0.268236	0.397111	0.63729	-1.65033	-1.19644
M18020	SNP	GAAGAGATTGCCAACAGGTTT	21	11	T11C	1.81389	0.100055	-0.105338	-0.524161	1.20249	1.76527
M18021	SNP	GAAGAGATTGGCAACAGGTTT	21	11	T11G	0.75017	1.31854	0.0897655	-0.931071	-0.189982	0.522036
M18082	SNP	TAGCCATGGTCGCGTCTCGCT	21	11	A11C	-0.567735	1.91321	-2.66877	1.30716	-1.44217	-1.28037
M18083	SNP	TAGCCATGGTGGCGTCTCGCT	21	11	A11G	-1.41644	-4.01636	2.35936	1.8701	0.484722	0.689176
M18084	SNP	TAGCCATGGTTGCGTCTCGCT	21	11	A11T	2.04411	-0.578606	2.10419	2.48625	-0.78122	0.429942
M15133	SNP	TTAGAGCTGATACATTCAGCG	21	12	C12A	-2.32501	1.41565	2.11308	-4.71273	1.44479	0.826222
M15134	SNP	TTAGAGCTGATGCATTCAGCG	21	12	C12G	0.874217	1.31093	-5.27356	-0.0448059	1.24502	-4.88721
M15135	SNP	TTAGAGCTGATTCATTCAGCG	21	12	C12T	1.92686	3.71019	-1.97404	3.72658	-4.24338	0.852041
M15322	SNP	GCTAACGCATCAAAGGTATGG	21	12	T12A	1.90252	2.53455	2.76278	1.5102	1.91607	-1.83647
M15323	SNP	GCTAACGCATCCAAGGTATGG	21	12	T12C	-2.40304	-2.15951	0.707753	1.53988	-2.02906	-1.61619
M15324	SNP	GCTAACGCATCGAAGGTATGG	21	12	T12G	2.82662	-5.13997	1.96535	1.63886	0.452024	-0.778152
M15385	SNP	ACGGTTGCTTGATCAGCGAAC	21	12	T12A	-2.658	0.74336	-3.22417	-1.87714	-1.48138	-1.76785
M15386	SNP	ACGGTTGCTTGCTCAGCGAAC	21	12	T12C	3.62861	-3.46836	-3.58742	0.553921	-4.75132	-4.66801
M15387	SNP	ACGGTTGCTTGGTCAGCGAAC	21	12	T12G	#N/A	#N/A	#N/A	#N/A	#N/A	#N/A
M15508	SNP	CGTCGCGAGTTATGAGGCTGT	21	12	G12A	0.936227	-0.126965	0.136439	0.849117	1.32547	0.745736
M15509	SNP	CGTCGCGAGTTCTGAGGCTGT	21	12	G12C	0.707504	-0.672411	0.240769	1.19123	0.428965	0.307438
M15510	SNP	CGTCGCGAGTTTTGAGGCTGT	21	12	G12T	0.738144	1.33321	1.01644	0.87531	2.65912	-0.219763
M15769	SNP	CTCGCGAAAGAACCCGGACAC	21	12	G12A	-0.509049	-0.179838	0.0277988	1.63424	0.913364	0.571196
M15770	SNP	CTCGCGAAAGACCCCGGACAC	21	12	G12C	-0.247598	0.508447	0.0344158	0.315739	-0.295371	-1.93727
M15771	SNP	CTCGCGAAAGATCCCGGACAC	21	12	G12T	0.19132	1.56944	-0.832105	1.7058	-1.78986	-1.83676
M16162	SNP	GAGGGAGAAGCAGAAACCGGC	21	12	C12A	-2.2749	1.1209	2.1841	0.0154156	0.58529	1.22994
M16163	SNP	GAGGGAGAAGCGGAAACCGGC	21	12	C12G	0.359366	-1.25271	-1.34425	2.04748	2.15814	1.33153
M16164	SNP	GAGGGAGAAGCTGAAACCGGC	21	12	C12T	1.02158	-0.183804	2.86006	0.938018	-3.79447	-4.23029
M16225	SNP	CCACGGTAAAAATGCGCGCCG	21	12	G12A	1.66722	0.368228	-0.272731	0.0694225	1.80276	-0.164708
M16226	SNP	CCACGGTAAAACTGCGCGCCG	21	12	G12C	0.680407	0.621567	0.467037	-1.24361	-2.05246	2.66715
M16227	SNP	CCACGGTAAAATTGCGCGCCG	21	12	G12T	1.12514	0.735629	0.873829	0.723134	2.27216	0.695534
M16288	SNP	CCGGCGTTAGCAACTCCGAAG	21	12	C12A	-6.51271	1.08908	-2.29574	-4.81875	-4.029	-5.33088
M16289	SNP	CCGGCGTTAGCGACTCCGAAG	21	12	C12G	0.457344	-1.36406	-4.43997	1.51077	-3.40429	4.07636
M16290	SNP	CCGGCGTTAGCTACTCCGAAG	21	12	C12T	-4.61704	3.33062	2.12934	-3.6661	-4.49839	0.391148
M16741	SNP	ACCAACGGATTAGAGCCGGCG	21	12	T12A	1.52062	-1.76686	0.373711	-4.55475	-3.04093	-1.04681
M16742	SNP	ACCAACGGATTCGAGCCGGCG	21	12	T12C	0.720969	-0.538947	0.712249	-1.10466	0.905617	-0.145159
M16743	SNP	ACCAACGGATTGGAGCCGGCG	21	12	T12G	-2.21555	-2.0916	-2.60448	1.2837	-1.72004	1.67827
M17194	SNP	GCTTCCAGTAGAGACAGAAGC	21	12	C12A	#N/A	#N/A	#N/A	#N/A	#N/A	#N/A
M17195	SNP	GCTTCCAGTAGGGACAGAAGC	21	12	C12G	#N/A	#N/A	#N/A	#N/A	#N/A	#N/A
M17196	SNP	GCTTCCAGTAGTGACAGAAGC	21	12	C12T	#N/A	#N/A	#N/A	#N/A	#N/A	#N/A
M17836	SNP	CAGGCTCCTTAAAGGCAGCCC	21	12	C12A	#N/A	#N/A	#N/A	#N/A	#N/A	#N/A
M17837	SNP	CAGGCTCCTTAGAGGCAGCCC	21	12	C12G	#N/A	#N/A	#N/A	#N/A	#N/A	#N/A
M17838	SNP	CAGGCTCCTTATAGGCAGCCC	21	12	C12T	-4.19971	-7.87073	-8.35657	2.82355	4.00398	2.06444
M17899	SNP	TTGAGCAGGACACCGAAAGGG	21	12	C12A	0.157924	1.37801	2.23631	1.23816	2.40155	0.78681
M17900	SNP	TTGAGCAGGACGCCGAAAGGG	21	12	C12G	-0.268939	-0.811013	0.287122	-0.186818	-0.422224	2.07113
M17901	SNP	TTGAGCAGGACTCCGAAAGGG	21	12	C12T	2.10013	1.25517	2.40794	0.988775	1.77254	1.22093
M18022	SNP	GAAGAGATTGTAAACAGGTTT	21	12	C12A	0.174003	-0.49313	2.33644	0.872214	0.524479	3.15899
M18023	SNP	GAAGAGATTGTGAACAGGTTT	21	12	C12G	0.566982	0.368029	-1.36306	-0.0653587	-4.05104	-1.68066
M18024	SNP	GAAGAGATTGTTAACAGGTTT	21	12	C12T	-0.844475	-1.00216	-1.97832	-0.0924918	-2.83241	1.08194
M18085	SNP	TAGCCATGGTAACGTCTCGCT	21	12	G12A	-1.8592	-4.91743	2.18849	1.21805	1.31198	2.67119
M18086	SNP	TAGCCATGGTACCGTCTCGCT	21	12	G12C	-1.04571	0.519828	-0.231824	-0.651884	0.476543	1.28787
M18087	SNP	TAGCCATGGTATCGTCTCGCT	21	12	G12T	1.04753	-0.0660094	1.3968	1.62319	1.56947	1.10755
M16354	SNP	AGCGAGGTCCGTACCACCGAAG	22	13	C13A	-1.44888	1.96878	1.03073	0.003239	-1.29691	0.0862786
M16355	SNP	AGCGAGGTCCGTGCCACCGAAG	22	13	C13G	-0.229566	-2.7121	0.940935	0.0400639	2.05039	1.43097
M16356	SNP	AGCGAGGTCCGTTCCACCGAAG	22	13	C13T	-1.74875	0.376099	1.55282	0.0632206	-0.944107	0.323447
M16678	SNP	GCGGATCACCGCATCCAGTAGC	22	13	T13A	0.971107	3.20757	1.05895	0.386232	-3.74018	-2.40285
M16679	SNP	GCGGATCACCGCCTCCAGTAGC	22	13	T13C	0.0306943	0.530977	-2.04895	2.30093	-4.42263	-0.0639477
M16680	SNP	GCGGATCACCGCGTCCAGTAGC	22	13	T13G	-2.33971	-0.911193	0.760276	1.89639	-0.417961	0.80559
M16807	SNP	AAGCCTGTGAACACGAGTTAGA	22	13	G13A	-3.28087	1.2826	0.433184	-3.29163	-2.29457	-0.154985
M16808	SNP	AAGCCTGTGAACCCGAGTTAGA	22	13	G13C	-1.43241	1.54964	-1.239	-1.16816	0.200654	-2.5558
M16809	SNP	AAGCCTGTGAACTCGAGTTAGA	22	13	G13T	-1.63015	-3.09363	0.637423	1.20646	2.36158	-1.61826
M17131	SNP	GTGGGAGAAAACACCACACCAG	22	13	T13A	#N/A	#N/A	#N/A	#N/A	#N/A	#N/A
M17132	SNP	GTGGGAGAAAACCCCACACCAG	22	13	T13C	#N/A	#N/A	#N/A	#N/A	#N/A	#N/A
M17133	SNP	GTGGGAGAAAACGCCACACCAG	22	13	T13G	-7.87661	-0.245567	-5.3897	-2.39516	-3.40203	-3.17124
M17260	SNP	AACAGTCTGGGTAGCCACTTTA	22	13	T13A	-2.53311	-2.80403	-1.17547	-2.70019	3.18114	-1.30728
M17261	SNP	AACAGTCTGGGTCGCCACTTTA	22	13	T13C	-3.01083	-1.69952	-1.91343	0.746249	4.07901	2.53069
M17262	SNP	AACAGTCTGGGTGGCCACTTTA	22	13	T13G	3.14285	-0.421215	0.809894	-2.22977	-0.176092	-1.3726
M17446	SNP	GTAACGGTTGCTAGTTCAGCGA	22	13	T13A	-1.68018	-3.75652	-5.71014	-5.94143	-6.92891	-1.71261
M17447	SNP	GTAACGGTTGCTCGTTCAGCGA	22	13	T13C	0.301028	-5.02042	-6.59373	-5.03592	-2.87021	-3.15687
M17448	SNP	GTAACGGTTGCTGGTTCAGCGA	22	13	T13G	-5.30765	-4.14589	-5.33528	-6.00535	-3.94049	-2.58475
M15007	SNP	CTCATAGGAAGAACCTCTTGAA	22	14	A14C	1.2272	2.52425	-0.449999	2.09928	-1.65103	-1.12805
M15008	SNP	CTCATAGGAAGAAGCTCTTGAA	22	14	A14G	1.14455	0.774728	-1.3402	1.45548	0.528413	1.18465
M15009	SNP	CTCATAGGAAGAATCTCTTGAA	22	14	A14T	-1.73257	2.27666	4.31919	2.82897	-2.69073	-3.29185
M15073	SNP	AGCAAGACGGAAAACCGAGGTA	22	14	C14A	1.12608	1.48628	0.858045	-2.29692	-2.56774	-0.983774
M15074	SNP	AGCAAGACGGAAAGCCGAGGTA	22	14	C14G	-0.647625	-3.45148	0.266187	-2.59079	-2.41318	0.437124
M15075	SNP	AGCAAGACGGAAATCCGAGGTA	22	14	C14T	0.667768	0.152744	-1.57357	-0.249002	-0.759308	1.91961
M15262	SNP	ACGGATGCTGGTTAGTAAAACA	22	14	T14A	0.360346	2.32402	-1.87422	0.747605	3.4112	-0.1579
M15263	SNP	ACGGATGCTGGTTCGTAAAACA	22	14	T14C	0.481687	-2.57863	-1.23931	1.86981	-2.72571	1.60143
M15264	SNP	ACGGATGCTGGTTGGTAAAACA	22	14	T14G	-1.80767	0.735844	1.20726	-0.421328	3.58861	2.29163
M15577	SNP	ATCTAACTTGATGATAGTACCG	22	14	T14A	-1.02069	-1.06346	2.11214	4.92271	0.456134	-0.262293
M15578	SNP	ATCTAACTTGATGCTAGTACCG	22	14	T14C	0.273057	3.55779	0.790404	-0.575282	1.27328	1.78823
M15579	SNP	ATCTAACTTGATGGTAGTACCG	22	14	T14G	1.57114	-1.33606	-2.4442	0.0560309	-2.82364	2.37411
M15643	SNP	ACGTACGGCTCTCCTAGGAAGA	22	14	A14C	-0.149385	2.11746	-0.191952	3.32918	-4.42802	-2.6304
M15644	SNP	ACGTACGGCTCTCGTAGGAAGA	22	14	A14G	#N/A	#N/A	#N/A	#N/A	#N/A	#N/A
M15645	SNP	ACGTACGGCTCTCTTAGGAAGA	22	14	A14T	-1.36474	1.1869	1.88123	2.90882	2.02537	2.47481
M15709	SNP	GGCTGTAGCAGGAACGTGCGTC	22	14	G14A	#N/A	#N/A	#N/A	#N/A	#N/A	#N/A
M15710	SNP	GGCTGTAGCAGGACCGTGCGTC	22	14	G14C	-3.8471	-2.97504	-0.984723	-2.40914	-2.45336	-2.14832
M15711	SNP	GGCTGTAGCAGGATCGTGCGTC	22	14	G14T	-1.63865	1.30393	-0.533553	-2.54826	-1.55166	0.320955
M15907	SNP	TGCGATTGCTGAGAGAATCGGG	22	14	G14A	-4.94455	-2.06219	-1.59277	0.346902	2.89479	-2.92406
M15908	SNP	TGCGATTGCTGAGCGAATCGGG	22	14	G14C	-3.88225	-4.32481	2.81629	-4.73734	-4.83315	2.24534
M15909	SNP	TGCGATTGCTGAGTGAATCGGG	22	14	G14T	-2.22106	-5.76268	1.19131	-4.04568	-2.2034	-4.88792
M15973	SNP	ATGAAAGCACCGAACCCTTTCT	22	14	C14A	1.59394	-2.51667	-3.51094	3.11698	-4.70342	0.420813
M15974	SNP	ATGAAAGCACCGAGCCCTTTCT	22	14	C14G	1.53546	-2.55709	-0.659617	-4.27549	-2.92293	3.07329
M15975	SNP	ATGAAAGCACCGATCCCTTTCT	22	14	C14T	1.07401	2.56908	2.63509	2.14777	-2.10366	-2.01578
M16357	SNP	AGCGAGGTCCGTCACACCGAAG	22	14	C14A	-0.04219	2.48279	3.27459	-1.08916	-4.28046	-1.85941
M16358	SNP	AGCGAGGTCCGTCGCACCGAAG	22	14	C14G	-1.54081	1.00174	-2.70307	-1.77546	-5.07732	2.14959
M16359	SNP	AGCGAGGTCCGTCTCACCGAAG	22	14	C14T	0.678363	0.503874	0.518243	-2.19975	-0.366513	0.628931
M16681	SNP	GCGGATCACCGCTACCAGTAGC	22	14	T14A	1.34675	4.54616	1.65661	-6.30387	-3.37439	-0.223214
M16682	SNP	GCGGATCACCGCTCCCAGTAGC	22	14	T14C	0.810445	4.60966	1.638	-2.33711	-2.53597	0.371177
M16683	SNP	GCGGATCACCGCTGCCAGTAGC	22	14	T14G	1.95653	0.957883	-1.90899	1.43839	1.56685	3.30188
M16810	SNP	AAGCCTGTGAACGAGAGTTAGA	22	14	C14A	-0.926787	0.0356052	-0.00867163	0.0853564	0.401206	-1.4104
M16811	SNP	AAGCCTGTGAACGGGAGTTAGA	22	14	C14G	-0.972114	-0.0308351	1.51212	2.63967	-0.106968	2.71157
M16812	SNP	AAGCCTGTGAACGTGAGTTAGA	22	14	C14T	1.35997	1.3703	1.03006	1.40871	0.62772	-3.70319
M17134	SNP	GTGGGAGAAAACTACACACCAG	22	14	C14A	-6.22944	0.0662197	1.10537	-5.33934	-4.86697	-5.78425
M17135	SNP	GTGGGAGAAAACTGCACACCAG	22	14	C14G	-1.89166	-2.89096	-4.91532	4.78843	4.2591	-4.71774
M17136	SNP	GTGGGAGAAAACTTCACACCAG	22	14	C14T	#N/A	#N/A	#N/A	#N/A	#N/A	#N/A
M17263	SNP	AACAGTCTGGGTTACCACTTTA	22	14	G14A	-0.77564	-2.73806	-2.43462	-0.53183	-2.78723	-0.0657701
M17264	SNP	AACAGTCTGGGTTCCCACTTTA	22	14	G14C	-2.19942	2.53394	-3.43963	3.00249	-0.911236	-2.6537
M17265	SNP	AACAGTCTGGGTTTCCACTTTA	22	14	G14T	0.940665	1.60031	1.80863	-1.7725	2.33744	1.59432
M17449	SNP	GTAACGGTTGCTTATTCAGCGA	22	14	G14A	-5.41259	-1.34698	0.828764	1.76093	-4.21143	-5.1408
M17450	SNP	GTAACGGTTGCTTCTTCAGCGA	22	14	G14C	-4.02044	-0.637576	-3.05471	-0.344466	-4.90605	0.463497
M17451	SNP	GTAACGGTTGCTTTTTCAGCGA	22	14	G14T	1.49562	-3.11687	-5.85244	1.58012	-9.59535	-3.95185
M15010	SNP	CTCATAGGAAGAAAATCTTGAA	22	15	C15A	4.56104	0.134835	-7.943	-6.8587	-2.97708	-2.99135
M15011	SNP	CTCATAGGAAGAAAGTCTTGAA	22	15	C15G	0.703552	-3.73557	-0.608547	-4.74297	-1.03655	-5.7461
M15012	SNP	CTCATAGGAAGAAATTCTTGAA	22	15	C15T	0.759967	1.38074	0.0983896	2.99893	0.247198	-4.13099
M15076	SNP	AGCAAGACGGAAACACGAGGTA	22	15	C15A	1.51712	0.742586	-0.0220099	0.620695	0.516543	0.341916
M15077	SNP	AGCAAGACGGAAACGCGAGGTA	22	15	C15G	0.543685	1.08329	-0.895981	-1.24278	0.784088	-0.296981
M15078	SNP	AGCAAGACGGAAACTCGAGGTA	22	15	C15T	2.0734	0.794145	-2.54994	-0.629312	-3.24446	-4.66113
M15178	SNP	AGTATAGAACCACGCTATGT	20	6	G6A	0.810785	0.492301	1.10946	3.25835	2.70382	-1.65005
M15179	SNP	AGTATCGAACCACGCTATGT	20	6	G6C	0.915983	0.185909	0.0223592	-0.977315	1.08356	-1.26412
M15180	SNP	AGTATTGAACCACGCTATGT	20	6	G6T	3.98179	2.32329	1.49408	3.05793	-2.00391	1.19965
M15430	SNP	CCTGCAGGCCACGTGTTTTG	20	6	C6A	0.668818	0.395503	0.78811	2.24965	1.55662	-0.160846
M15431	SNP	CCTGCGGGCCACGTGTTTTG	20	6	C6G	0.897306	2.18455	-0.539299	0.930694	0.382911	2.56916
M15432	SNP	CCTGCTGGCCACGTGTTTTG	20	6	C6T	-0.269618	0.114987	1.1769	0.828316	1.5292	1.02045
M16084	SNP	ATGCCAGAGTTTGCTGCGAT	20	6	G6A	1.40154	-0.151139	0.154604	-1.55918	1.1105	3.25305
M16085	SNP	ATGCCCGAGTTTGCTGCGAT	20	6	G6C	0.265984	-0.163258	2.24103	-1.53217	-0.718446	1.0616
M16086	SNP	ATGCCTGAGTTTGCTGCGAT	20	6	G6T	1.1091	0.37553	-0.836245	0.653773	-1.85553	0.401945
M16399	SNP	CGGATAGTACCCCTCGATGC	20	6	T6A	-1.34766	0.719687	1.17267	0.733754	2.50912	1.80824
M16400	SNP	CGGATCGTACCCCTCGATGC	20	6	T6C	-0.155506	0.548188	0.919401	-0.0297337	1.72365	-1.54966
M16401	SNP	CGGATGGTACCCCTCGATGC	20	6	T6G	-0.674495	0.974981	3.04889	1.63232	1.16906	-2.26858
M16528	SNP	CCACGCTGACCCACTTCGCT	20	6	A6C	-1.60847	-1.79334	-0.912787	-0.434147	-0.583088	-0.553262
M16529	SNP	CCACGGTGACCCACTTCGCT	20	6	A6G	0.77162	2.21323	-0.412083	1.09177	-1.21763	2.95417
M16530	SNP	CCACGTTGACCCACTTCGCT	20	6	A6T	-0.577731	-1.23721	0.450986	-3.56357	-3.14736	3.25357
M16852	SNP	CGCAAAGTTCTGCGGCACTT	20	6	C6A	1.85942	-0.266827	0.781898	-3.04436	0.0233895	3.82198
M16853	SNP	CGCAAGGTTCTGCGGCACTT	20	6	C6G	1.47938	2.99533	-0.493817	1.66737	3.13639	2.20583
M16854	SNP	CGCAATGTTCTGCGGCACTT	20	6	C6T	-0.292073	-0.526299	-0.689375	-0.609447	0.262558	0.177474
M17050	SNP	ACGACAGGGAGTCCAGTTCG	20	6	C6A	-4.69391	-1.94111	-1.43406	-3.73031	0.209831	0.609972
M17051	SNP	ACGACGGGGAGTCCAGTTCG	20	6	C6G	-0.773006	2.01361	-0.897216	-2.06986	-1.32089	-2.54602
M17052	SNP	ACGACTGGGAGTCCAGTTCG	20	6	C6T	#N/A	#N/A	#N/A	#N/A	#N/A	#N/A
M17305	SNP	AGAGACAGATCGCGAGGAAG	20	6	A6C	2.80496	1.22777	0.843226	1.79355	2.21332	2.9222
M17306	SNP	AGAGAGAGATCGCGAGGAAG	20	6	A6G	1.19767	2.82501	3.01893	0.640732	1.70623	0.0158505
M17307	SNP	AGAGATAGATCGCGAGGAAG	20	6	A6T	2.71571	0.738995	1.77454	2.58009	2.42885	1.87731
M17365	SNP	GTAGGAAGCGTCAACGCTTA	20	6	G6A	0.0846615	0.0738173	0.0952739	1.48027	2.52782	0.370812
M17366	SNP	GTAGGCAGCGTCAACGCTTA	20	6	G6C	0.183762	-0.379967	-0.236203	-0.449413	-0.0654148	-0.143633
M17367	SNP	GTAGGTAGCGTCAACGCTTA	20	6	G6T	1.43283	-0.97006	2.97904	0.479524	-1.06768	0.639655
M17629	SNP	ACTTTCCGTACGCGCCAGTT	20	6	A6C	-0.0827066	-2.86442	-2.779	-1.55515	-0.48775	2.18937
M17630	SNP	ACTTTGCGTACGCGCCAGTT	20	6	A6G	-0.710047	1.787	-0.0986922	-1.87456	-2.61223	-3.29296
M17631	SNP	ACTTTTCGTACGCGCCAGTT	20	6	A6T	0.584431	1.29795	2.33905	1.20002	-1.05141	1.60936
M17689	SNP	GAAGAAATTGTCAACAGGTT	20	6	G6A	1.05009	2.61287	1.88076	1.53878	1.0505	2.13176
M17690	SNP	GAAGACATTGTCAACAGGTT	20	6	G6C	1.75012	1.08418	0.615077	1.4728	2.36135	2.49388
M17691	SNP	GAAGATATTGTCAACAGGTT	20	6	G6T	1.54208	0.97826	1.78907	0.350151	3.1342	1.68044
M17944	SNP	CAGTAAGGAACCACGCTATG	20	6	T6A	1.34964	2.51291	0.943971	-1.03163	-0.000751614	0.353767
M17945	SNP	CAGTACGGAACCACGCTATG	20	6	T6C	-0.65526	-2.49599	0.782222	-1.90133	-0.494063	0.552187
M17946	SNP	CAGTAGGGAACCACGCTATG	20	6	T6G	-4.45729	-1.14278	-0.291297	-3.21966	-0.044021	-0.247752
M15181	SNP	AGTATGAAACCACGCTATGT	20	7	G7A	2.71577	-1.86767	-0.081106	0.921425	-1.76215	-2.88853
M15182	SNP	AGTATGCAACCACGCTATGT	20	7	G7C	3.94019	2.72731	1.35935	-2.50842	0.896539	2.98136
M15183	SNP	AGTATGTAACCACGCTATGT	20	7	G7T	3.45039	3.45596	3.16575	-0.291681	1.92707	2.38999
M15433	SNP	CCTGCCAGCCACGTGTTTTG	20	7	G7A	1.2367	1.46715	0.88919	1.79853	1.0655	1.53173
M15434	SNP	CCTGCCCGCCACGTGTTTTG	20	7	G7C	1.27387	-0.283093	0.491542	0.483624	0.791179	2.13137
M15435	SNP	CCTGCCTGCCACGTGTTTTG	20	7	G7T	1.01671	1.36747	0.915788	1.25651	1.01205	1.04132
M16087	SNP	ATGCCGAAGTTTGCTGCGAT	20	7	G7A	-2.05064	1.1912	0.601082	-0.798715	-3.18527	3.37401
M16088	SNP	ATGCCGCAGTTTGCTGCGAT	20	7	G7C	2.77996	-4.03679	-5.09776	-3.05587	-3.82946	-2.47284
M16089	SNP	ATGCCGTAGTTTGCTGCGAT	20	7	G7T	-0.22399	0.089805	0.536465	-0.171485	4.17336	4.06808
M16402	SNP	CGGATTATACCCCTCGATGC	20	7	G7A	2.79556	3.0264	0.0181961	0.808853	1.37506	-0.333214
M16403	SNP	CGGATTCTACCCCTCGATGC	20	7	G7C	0.311169	1.76467	1.16718	3.02214	-0.584138	0.220401
M16404	SNP	CGGATTTTACCCCTCGATGC	20	7	G7T	1.24148	0.334672	1.17069	0.735084	0.886918	0.377653
M16531	SNP	CCACGAAGACCCACTTCGCT	20	7	T7A	1.28491	-1.12681	-0.576341	0.451602	-3.64488	-3.18798
M16532	SNP	CCACGACGACCCACTTCGCT	20	7	T7C	0.83481	-0.465265	-0.0827205	0.750281	-2.8818	0.884007
M16533	SNP	CCACGAGGACCCACTTCGCT	20	7	T7G	1.03081	0.406414	-2.53964	0.294011	0.609628	0.34838
M16855	SNP	CGCAACATTCTGCGGCACTT	20	7	G7A	-2.2407	-1.43212	-2.79336	-4.60534	5.55674	-0.531276
M16856	SNP	CGCAACCTTCTGCGGCACTT	20	7	G7C	2.20646	0.611657	-1.27103	-1.06266	-1.64457	0.743125
M16857	SNP	CGCAACTTTCTGCGGCACTT	20	7	G7T	2.17463	0.681821	1.6554	0.620886	0.421753	0.872317
M17053	SNP	ACGACCAGGAGTCCAGTTCG	20	7	G7A	#N/A	#N/A	#N/A	#N/A	#N/A	#N/A
M17054	SNP	ACGACCCGGAGTCCAGTTCG	20	7	G7C	#N/A	#N/A	#N/A	#N/A	#N/A	#N/A
M17055	SNP	ACGACCTGGAGTCCAGTTCG	20	7	G7T	#N/A	#N/A	#N/A	#N/A	#N/A	#N/A
M17308	SNP	AGAGAACGATCGCGAGGAAG	20	7	A7C	2.68032	0.573773	2.4105	2.0881	2.32524	2.27204
M17309	SNP	AGAGAAGGATCGCGAGGAAG	20	7	A7G	-0.543194	-0.818389	2.51156	0.20665	2.32542	0.905311
M17310	SNP	AGAGAATGATCGCGAGGAAG	20	7	A7T	2.05961	1.49997	1.16073	0.783811	2.33424	2.75353
M17752	SNP	GACTCAACCGTTATTACGTCAGT	23	7	C7A	-0.620218	-4.79507	0.460695	1.23199	-3.12081	-2.44704
M17753	SNP	GACTCAGCCGTTATTACGTCAGT	23	7	C7G	#N/A	#N/A	#N/A	#N/A	#N/A	#N/A
M17754	SNP	GACTCATCCGTTATTACGTCAGT	23	7	C7T	-0.53141	-0.998876	-1.83746	-4.67576	-3.25274	-0.866979
M14920	SNP	GAGGTCCATGGGCCGAAGCCCGC	23	8	C8A	0.531116	-0.829407	1.84064	-1.57602	-5.00736	2.20309
M14921	SNP	GAGGTCCGTGGGCCGAAGCCCGC	23	8	C8G	0.172368	-0.894828	1.44334	-0.402496	0.121968	0.360193
M14922	SNP	GAGGTCCTTGGGCCGAAGCCCGC	23	8	C8T	2.56287	3.5447	-5.83664	3.16682	-4.1173	1.52443
M15820	SNP	GCACCGTAGGAGAACGTGCATTG	23	8	T8A	-2.47945	-7.45775	-5.64434	-3.14335	-2.60583	0.451102
M15821	SNP	GCACCGTCGGAGAACGTGCATTG	23	8	T8C	-6.62215	0.770551	-4.73744	-6.62215	-6.41211	-4.73744
M15822	SNP	GCACCGTGGGAGAACGTGCATTG	23	8	T8G	#N/A	#N/A	#N/A	#N/A	#N/A	#N/A
M16021	SNP	GCATCTACGGTATGGACCATCGA	23	8	A8C	-2.17852	-2.11666	-3.22362	1.72937	-3.66741	-2.7675
M16022	SNP	GCATCTAGGGTATGGACCATCGA	23	8	A8G	0.622915	-2.80656	0.0127804	-6.04038	2.48808	-1.60634
M16023	SNP	GCATCTATGGTATGGACCATCGA	23	8	A8T	#N/A	#N/A	#N/A	#N/A	#N/A	#N/A
M16465	SNP	GTCGGTGCTTTCACCTCCAGTAT	23	8	A8C	3.05173	-2.40464	-2.37006	3.03263	-4.15537	3.80359
M16466	SNP	GTCGGTGGTTTCACCTCCAGTAT	23	8	A8G	#N/A	#N/A	#N/A	#N/A	#N/A	#N/A
M16467	SNP	GTCGGTGTTTTCACCTCCAGTAT	23	8	A8T	-4.85892	0.229881	2.90798	0.268038	-4.11252	2.66494
M16594	SNP	GTTACCTCCAGGTAGGAGCCAGT	23	8	A8C	-1.01597	-4.35711	0.977054	1.09075	2.55689	-1.19716
M16595	SNP	GTTACCTGCAGGTAGGAGCCAGT	23	8	A8G	0.560918	-3.2534	-1.86674	2.26679	2.24303	-0.995219
M16596	SNP	GTTACCTTCAGGTAGGAGCCAGT	23	8	A8T	3.75701	1.08676	3.19016	1.85186	0.749766	-4.50775
M16918	SNP	CTCAAATATGAACCCATTTCCCA	23	8	G8A	2.09243	1.01124	2.54172	1.41676	1.7241	-0.107726
M16919	SNP	CTCAAATCTGAACCCATTTCCCA	23	8	G8C	0.82412	1.65829	1.11273	2.81041	-0.779722	0.63142
M16920	SNP	CTCAAATTTGAACCCATTTCCCA	23	8	G8T	1.60134	2.12339	1.29074	1.69902	1.87722	1.80878
M16987	SNP	CGAACGTATTACGAAGATTCGGT	23	8	T8A	-5.57471	-5.66835	-7.943	-0.395369	-5.47717	-3.94547
M16988	SNP	CGAACGTCTTACGAAGATTCGGT	23	8	T8C	#N/A	#N/A	#N/A	#N/A	#N/A	#N/A
M16989	SNP	CGAACGTGTTACGAAGATTCGGT	23	8	T8G	#N/A	#N/A	#N/A	#N/A	#N/A	#N/A
M17497	SNP	CTATGGTACCGGCGTTACCAAAA	23	8	T8A	1.36051	-3.82523	3.75531	-3.09692	-3.8739	-1.38944
M17498	SNP	CTATGGTCCCGGCGTTACCAAAA	23	8	T8C	-0.464568	2.04938	-1.74419	-0.658369	5.07293	2.70855
M17499	SNP	CTATGGTGCCGGCGTTACCAAAA	23	8	T8G	3.36905	-5.15124	1.64009	3.80788	-8.32363	-3.04556
M17566	SNP	GGAGGGGCCGAAGGTCTCGTTCT	23	8	A8C	-2.95278	1.67568	-0.244901	0.403523	2.71228	1.98736
M17567	SNP	GGAGGGGGCGAAGGTCTCGTTCT	23	8	A8G	0.697189	0.365511	0.059215	0.480515	-1.38022	0.622492
M17568	SNP	GGAGGGGTCGAAGGTCTCGTTCT	23	8	A8T	-0.754835	0.499284	1.75319	1.1714	2.72855	2.45982
M17755	SNP	GACTCACACGTTATTACGTCAGT	23	8	C8A	2.59653	1.15098	0.699448	1.418	-3.74018	1.13915
M17756	SNP	GACTCACGCGTTATTACGTCAGT	23	8	C8G	#N/A	#N/A	#N/A	#N/A	#N/A	#N/A
M17757	SNP	GACTCACTCGTTATTACGTCAGT	23	8	C8T	-4.45275	-3.96173	1.6189	1.93013	-4.72724	1.01776
M14923	SNP	GAGGTCCCAGGGCCGAAGCCCGC	23	9	T9A	0.41515	1.161	0.638397	1.20331	1.98916	0.266739
M14924	SNP	GAGGTCCCCGGGCCGAAGCCCGC	23	9	T9C	0.173492	-0.515932	-0.0629925	0.310954	2.81337	0.339563
M14925	SNP	GAGGTCCCGGGGCCGAAGCCCGC	23	9	T9G	-1.31015	1.73808	-1.78461	-1.66573	1.88201	-2.05553
M15823	SNP	GCACCGTTAGAGAACGTGCATTG	23	9	G9A	#N/A	#N/A	#N/A	#N/A	#N/A	#N/A
M15824	SNP	GCACCGTTCGAGAACGTGCATTG	23	9	G9C	#N/A	#N/A	#N/A	#N/A	#N/A	#N/A
M15825	SNP	GCACCGTTTGAGAACGTGCATTG	23	9	G9T	-5.79711	-6.67841	-4.08514	-2.74757	-3.31485	-3.70801
M16024	SNP	GCATCTAAAGTATGGACCATCGA	23	9	G9A	3.24342	-4.61756	1.77593	-5.00201	-3.9996	-5.36512
M16025	SNP	GCATCTAACGTATGGACCATCGA	23	9	G9C	2.10254	0.0514057	0.516332	1.08421	4.03113	1.90001
M16026	SNP	GCATCTAATGTATGGACCATCGA	23	9	G9T	-0.198401	0.187649	-0.714535	-2.85212	0.490866	3.42735
M16468	SNP	GTCGGTGAATTCACCTCCAGTAT	23	9	T9A	-3.85874	5.69831	-3.53982	-6.67817	-3.77872	-1.61011
M16469	SNP	GTCGGTGACTTCACCTCCAGTAT	23	9	T9C	#N/A	#N/A	#N/A	#N/A	#N/A	#N/A
M16470	SNP	GTCGGTGAGTTCACCTCCAGTAT	23	9	T9G	#N/A	#N/A	#N/A	#N/A	#N/A	#N/A
M16597	SNP	GTTACCTAAAGGTAGGAGCCAGT	23	9	C9A	-0.86001	-1.97133	1.65742	1.73265	-1.24994	2.30679
M16598	SNP	GTTACCTAGAGGTAGGAGCCAGT	23	9	C9G	0.201512	-4.10525	-0.273124	-2.88383	0.342501	-4.57495
M16599	SNP	GTTACCTATAGGTAGGAGCCAGT	23	9	C9T	-0.712879	1.5632	1.10561	-5.04152	2.67643	0.769284
M16921	SNP	CTCAAATGAGAACCCATTTCCCA	23	9	T9A	-0.11824	1.91614	3.93081	0.696229	-0.619844	-0.563982
M16922	SNP	CTCAAATGCGAACCCATTTCCCA	23	9	T9C	-1.61042	2.17883	-0.327177	-3.10759	-0.598048	-4.04809
M16923	SNP	CTCAAATGGGAACCCATTTCCCA	23	9	T9G	-0.228365	-4.52919	-0.286723	-7.64323	-4.33801	-2.15456
M16990	SNP	CGAACGTTATACGAAGATTCGGT	23	9	T9A	4.67755	-2.8995	0.956741	0.46654	-3.88319	5.00643
M16991	SNP	CGAACGTTCTACGAAGATTCGGT	23	9	T9C	#N/A	#N/A	#N/A	#N/A	#N/A	#N/A
M16992	SNP	CGAACGTTGTACGAAGATTCGGT	23	9	T9G	4.42382	-2.69735	-4.90103	-4.30323	-1.82222	-4.5239
M17500	SNP	CTATGGTTACGGCGTTACCAAAA	23	9	C9A	#N/A	#N/A	#N/A	#N/A	#N/A	#N/A
M17501	SNP	CTATGGTTGCGGCGTTACCAAAA	23	9	C9G	0.467829	-1.22439	-0.623391	-4.03188	1.08258	2.39874
M17502	SNP	CTATGGTTTCGGCGTTACCAAAA	23	9	C9T	0.366322	2.98718	1.0248	-2.36646	-4.23979	2.30981
M17569	SNP	GGAGGGGAAGAAGGTCTCGTTCT	23	9	C9A	0.773023	1.61292	-0.173645	0.992122	1.0982	-0.615559
M17570	SNP	GGAGGGGAGGAAGGTCTCGTTCT	23	9	C9G	0.249484	-0.648232	-2.38686	-0.0448814	-5.15429	2.28385
M17571	SNP	GGAGGGGATGAAGGTCTCGTTCT	23	9	C9T	-0.591079	-2.35185	1.95868	0.189585	2.22932	0.954377
M17758	SNP	GACTCACCAGTTATTACGTCAGT	23	9	C9A	-3.91566	-8.01009	-3.27494	-2.71655	-8.01009	-7.44066
M17759	SNP	GACTCACCGGTTATTACGTCAGT	23	9	C9G	1.5977	1.4266	-9.70439	-4.38442	-3.00122	0.844685
M17760	SNP	GACTCACCTGTTATTACGTCAGT	23	9	C9T	-4.01186	-3.27582	-4.11705	-4.67576	1.23437	-4.65231
M14926	SNP	GAGGTCCCTAGGCCGAAGCCCGC	23	10	G10A	1.35656	-2.77597	2.91586	2.16244	1.08644	0.534771
M14927	SNP	GAGGTCCCTCGGCCGAAGCCCGC	23	10	G10C	-0.44558	1.13458	0.331305	-0.704866	2.99288	0.334365
M14928	SNP	GAGGTCCCTTGGCCGAAGCCCGC	23	10	G10T	-1.03011	-1.32328	0.0589993	1.36477	-4.87074	2.05929
M15826	SNP	GCACCGTTGAAGAACGTGCATTG	23	10	G10A	#N/A	#N/A	#N/A	#N/A	#N/A	#N/A
M15827	SNP	GCACCGTTGCAGAACGTGCATTG	23	10	G10C	-8.07744	-2.36831	1.72654	-1.61223	-7.98573	-8.30427
M15828	SNP	GCACCGTTGTAGAACGTGCATTG	23	10	G10T	#N/A	#N/A	#N/A	#N/A	#N/A	#N/A
M17368	SNP	GTAGGGCGCGTCAACGCTTA	20	7	A7C	-3.11318	0.409232	-2.27588	-0.664629	-2.92329	1.03567
M17369	SNP	GTAGGGGGCGTCAACGCTTA	20	7	A7G	3.15007	-0.152172	-0.119505	2.17434	-1.75629	1.51423
M17370	SNP	GTAGGGTGCGTCAACGCTTA	20	7	A7T	1.10137	-1.73096	-0.161129	0.192293	1.0096	-1.35647
M17632	SNP	ACTTTAAGTACGCGCCAGTT	20	7	C7A	-0.433003	3.32823	0.593549	0.0274007	1.28338	1.61107
M17633	SNP	ACTTTAGGTACGCGCCAGTT	20	7	C7G	-2.17645	-4.165	-0.0448953	-1.71476	1.23085	-1.77791
M17634	SNP	ACTTTATGTACGCGCCAGTT	20	7	C7T	0.943569	1.16565	-1.35683	1.08974	1.91664	1.37289
M17692	SNP	GAAGAGCTTGTCAACAGGTT	20	7	A7C	-0.391389	0.31027	2.03585	1.96832	2.01338	0.998375
M17693	SNP	GAAGAGGTTGTCAACAGGTT	20	7	A7G	1.82357	2.01946	1.17487	0.698939	0.527	0.902755
M17694	SNP	GAAGAGTTTGTCAACAGGTT	20	7	A7T	2.01874	2.3266	0.352506	1.81804	1.69953	-0.430217
M17947	SNP	CAGTATAGAACCACGCTATG	20	7	G7A	1.29239	2.19594	0.0428583	2.10216	2.30578	0.231804
M17948	SNP	CAGTATCGAACCACGCTATG	20	7	G7C	-0.880946	0.37981	1.55172	2.89467	0.948837	3.41973
M17949	SNP	CAGTATTGAACCACGCTATG	20	7	G7T	-2.6408	1.66871	1.86456	2.14307	0.923905	0.335562
M15184	SNP	AGTATGGCACCACGCTATGT	20	8	A8C	0.844779	3.06382	2.3997	0.451212	2.44171	2.41761
M15185	SNP	AGTATGGGACCACGCTATGT	20	8	A8G	1.3282	1.21389	0.670123	1.02297	-1.72783	2.81971
M15186	SNP	AGTATGGTACCACGCTATGT	20	8	A8T	0.400131	2.3883	0.492684	1.02447	0.756232	-0.874979
M15436	SNP	CCTGCCGACCACGTGTTTTG	20	8	G8A	1.45783	0.325017	0.745525	1.51527	1.08897	1.51738
M15437	SNP	CCTGCCGCCCACGTGTTTTG	20	8	G8C	0.826829	0.0203511	0.329905	1.30198	0.99573	0.975627
M15438	SNP	CCTGCCGTCCACGTGTTTTG	20	8	G8T	1.39342	0.132565	0.397835	1.35256	1.2195	1.31733
M16090	SNP	ATGCCGGCGTTTGCTGCGAT	20	8	A8C	2.33443	2.37432	1.80973	1.54097	0.397558	3.20826
M16091	SNP	ATGCCGGGGTTTGCTGCGAT	20	8	A8G	0.212469	0.620901	-1.25762	1.27533	1.26581	1.10659
M16092	SNP	ATGCCGGTGTTTGCTGCGAT	20	8	A8T	-0.100572	-0.128874	1.22535	-0.715966	3.06011	-1.9965
M16405	SNP	CGGATTGAACCCCTCGATGC	20	8	T8A	-3.05795	-1.70807	-2.48598	-0.76551	-1.49821	-2.08662
M16406	SNP	CGGATTGCACCCCTCGATGC	20	8	T8C	0.725639	-1.44048	-0.145042	1.40072	0.163314	1.6338
M16407	SNP	CGGATTGGACCCCTCGATGC	20	8	T8G	2.16318	-3.83735	-0.391747	-3.79297	3.00016	-1.9692
M16534	SNP	CCACGATAACCCACTTCGCT	20	8	G8A	0.820404	-1.38428	1.24446	-1.16317	2.37744	0.573428
M16535	SNP	CCACGATCACCCACTTCGCT	20	8	G8C	-1.21993	-0.437613	-0.13236	0.269171	1.43196	-0.301921
M16536	SNP	CCACGATTACCCACTTCGCT	20	8	G8T	-1.67135	2.8069	-0.877434	1.80955	1.52566	-0.178184
M16858	SNP	CGCAACGATCTGCGGCACTT	20	8	T8A	0.290173	-0.162985	-0.441664	0.743572	-0.679981	-0.652343
M16859	SNP	CGCAACGCTCTGCGGCACTT	20	8	T8C	0.62545	-0.955267	-1.42722	-0.0641201	1.28654	0.923344
M16860	SNP	CGCAACGGTCTGCGGCACTT	20	8	T8G	0.576369	0.787855	1.16921	0.981225	-5.05788	-1.19364
M17056	SNP	ACGACCGAGAGTCCAGTTCG	20	8	G8A	#N/A	#N/A	#N/A	#N/A	#N/A	#N/A
M17057	SNP	ACGACCGCGAGTCCAGTTCG	20	8	G8C	#N/A	#N/A	#N/A	#N/A	#N/A	#N/A
M17058	SNP	ACGACCGTGAGTCCAGTTCG	20	8	G8T	#N/A	#N/A	#N/A	#N/A	#N/A	#N/A
M17311	SNP	AGAGAAAAATCGCGAGGAAG	20	8	G8A	2.70083	3.14512	3.65112	2.30159	2.47467	0.764635
M17312	SNP	AGAGAAACATCGCGAGGAAG	20	8	G8C	-0.374695	0.105408	1.2124	0.0398498	-1.76596	2.59574
M17313	SNP	AGAGAAATATCGCGAGGAAG	20	8	G8T	2.48612	2.8014	3.29259	2.57797	-0.448525	2.60021
M17371	SNP	GTAGGGAACGTCAACGCTTA	20	8	G8A	0.805451	-1.4474	-0.546372	0.753294	2.15488	0.443168
M17372	SNP	GTAGGGACCGTCAACGCTTA	20	8	G8C	0.729341	2.42502	2.07199	2.61321	-1.93782	1.8645
M17373	SNP	GTAGGGATCGTCAACGCTTA	20	8	G8T	1.88606	0.184019	0.613447	2.89961	1.38508	1.35682
M17635	SNP	ACTTTACATACGCGCCAGTT	20	8	G8A	0.834833	3.86159	2.84647	-0.363263	3.66764	0.932636
M17636	SNP	ACTTTACCTACGCGCCAGTT	20	8	G8C	-1.01501	-1.88022	-4.66026	-3.22704	-2.19403	-1.32875
M17637	SNP	ACTTTACTTACGCGCCAGTT	20	8	G8T	-1.92262	1.788	-4.24406	-3.63057	2.59137	0.599102
M17695	SNP	GAAGAGAATGTCAACAGGTT	20	8	T8A	1.50579	1.95082	2.3604	1.06362	2.58995	1.68369
M17696	SNP	GAAGAGACTGTCAACAGGTT	20	8	T8C	1.79325	2.23549	0.310474	-0.987101	2.78023	1.69335
M17697	SNP	GAAGAGAGTGTCAACAGGTT	20	8	T8G	0.938575	1.80039	1.65108	0.289877	1.898	0.447258
M17950	SNP	CAGTATGAAACCACGCTATG	20	8	G8A	0.927779	2.47483	2.42876	2.33996	0.804767	-3.3781
M17951	SNP	CAGTATGCAACCACGCTATG	20	8	G8C	2.99393	2.58038	-1.83713	-2.17031	0.89535	-2.25269
M17952	SNP	CAGTATGTAACCACGCTATG	20	8	G8T	1.82122	0.521899	-0.737604	-2.70528	-0.625625	-0.078591
M15187	SNP	AGTATGGACCCACGCTATGT	20	9	A9C	1.99154	-0.190229	2.72113	-0.225169	1.44555	1.68415
M15188	SNP	AGTATGGAGCCACGCTATGT	20	9	A9G	2.56572	3.38576	2.1595	1.20974	2.10701	-0.2843
M15189	SNP	AGTATGGATCCACGCTATGT	20	9	A9T	-1.65991	1.01224	-0.168337	0.675356	1.40694	3.00355
M15439	SNP	CCTGCCGGACACGTGTTTTG	20	9	C9A	-0.572764	0.170851	2.03256	0.723081	0.325485	0.207952
M15440	SNP	CCTGCCGGGCACGTGTTTTG	20	9	C9G	0.544134	0.673988	0.313607	-0.426254	1.19403	0.225924
M15441	SNP	CCTGCCGGTCACGTGTTTTG	20	9	C9T	-0.997591	0.744092	0.224982	1.79553	1.30125	-0.664074
M16093	SNP	ATGCCGGAATTTGCTGCGAT	20	9	G9A	-1.66919	-0.723179	-1.32538	-0.562274	1.21625	2.08361
M16094	SNP	ATGCCGGACTTTGCTGCGAT	20	9	G9C	-3.54528	-0.848959	1.6659	1.2321	3.03537	-2.88387
M16095	SNP	ATGCCGGATTTTGCTGCGAT	20	9	G9T	2.56689	2.48962	-0.927082	2.51907	0.274784	0.570867
M16408	SNP	CGGATTGTCCCCCTCGATGC	20	9	A9C	1.42713	1.65099	1.24332	0.37215	-0.456364	0.581329
M16409	SNP	CGGATTGTGCCCCTCGATGC	20	9	A9G	-0.939784	-2.32077	-1.12029	2.81054	-1.136	0.25776
M16410	SNP	CGGATTGTTCCCCTCGATGC	20	9	A9T	-1.55345	-0.279231	-0.0418156	-1.96184	3.41424	0.520435
M16027	SNP	GCATCTAAGATATGGACCATCGA	23	10	G10A	-1.90569	-3.85098	-0.0670863	-1.64227	-3.47289	-0.271373
M16028	SNP	GCATCTAAGCTATGGACCATCGA	23	10	G10C	-1.1364	-4.00781	1.55152	-0.492326	-3.48614	-2.16558
M16029	SNP	GCATCTAAGTTATGGACCATCGA	23	10	G10T	-1.2106	3.11506	1.95494	-0.0240738	-1.32967	0.979765
M16471	SNP	GTCGGTGATATCACCTCCAGTAT	23	10	T10A	#N/A	#N/A	#N/A	#N/A	#N/A	#N/A
M16472	SNP	GTCGGTGATCTCACCTCCAGTAT	23	10	T10C	-2.23688	-4.53106	-4.0352	-1.27211	0.183175	-5.82023
M16473	SNP	GTCGGTGATGTCACCTCCAGTAT	23	10	T10G	1.49907	0.807945	-1.76039	1.51243	0.8586	-5.02051
M16600	SNP	GTTACCTACCGGTAGGAGCCAGT	23	10	A10C	1.02168	-3.89818	-0.0176058	-4.87305	-0.185555	-0.52276
M16601	SNP	GTTACCTACGGGTAGGAGCCAGT	23	10	A10G	-3.28384	-3.38528	2.60877	-6.99727	-0.440835	0.729309
M16602	SNP	GTTACCTACTGGTAGGAGCCAGT	23	10	A10T	#N/A	#N/A	#N/A	#N/A	#N/A	#N/A
M16924	SNP	CTCAAATGTAAACCCATTTCCCA	23	10	G10A	-4.83088	-1.00182	-0.436325	1.65012	1.98977	-1.23335
M16925	SNP	CTCAAATGTCAACCCATTTCCCA	23	10	G10C	0.712996	2.30943	1.24381	0.718534	0.0201395	-0.166333
M16926	SNP	CTCAAATGTTAACCCATTTCCCA	23	10	G10T	-0.750036	3.16764	2.10248	1.83754	-1.27286	2.44436
M16993	SNP	CGAACGTTTAACGAAGATTCGGT	23	10	T10A	#N/A	#N/A	#N/A	#N/A	#N/A	#N/A
M16994	SNP	CGAACGTTTCACGAAGATTCGGT	23	10	T10C	#N/A	#N/A	#N/A	#N/A	#N/A	#N/A
M16995	SNP	CGAACGTTTGACGAAGATTCGGT	23	10	T10G	-6.74597	-5.75925	-9.48229	-2.78152	-4.99741	-6.39715
M17503	SNP	CTATGGTTCAGGCGTTACCAAAA	23	10	C10A	2.13039	-3.85509	2.85395	-1.34083	1.25618	-2.84251
M17504	SNP	CTATGGTTCGGGCGTTACCAAAA	23	10	C10G	-1.59603	-0.697304	-1.26762	-0.803113	-0.603405	-2.9074
M17505	SNP	CTATGGTTCTGGCGTTACCAAAA	23	10	C10T	0.973712	1.47548	-4.62541	-1.13801	-3.90244	-0.846477
M17572	SNP	GGAGGGGACAAAGGTCTCGTTCT	23	10	G10A	0.243787	1.63797	1.38129	-2.3653	0.620789	-0.751856
M17573	SNP	GGAGGGGACCAAGGTCTCGTTCT	23	10	G10C	1.262	2.80031	0.164351	-2.15181	1.50646	0.979138
M17574	SNP	GGAGGGGACTAAGGTCTCGTTCT	23	10	G10T	0.779042	-3.05531	-1.32097	0.168587	1.09854	-4.29144
M17761	SNP	GACTCACCCATTATTACGTCAGT	23	10	G10A	2.53494	-0.467649	-1.81599	-2.65156	1.12253	-1.5935
M17762	SNP	GACTCACCCCTTATTACGTCAGT	23	10	G10C	-5.93539	2.31071	3.65515	-5.70528	-3.99559	-1.28196
M17763	SNP	GACTCACCCTTTATTACGTCAGT	23	10	G10T	-1.34088	0.0970498	3.07552	1.87394	-3.10183	2.28041
M14929	SNP	GAGGTCCCTGAGCCGAAGCCCGC	23	11	G11A	-2.20793	-0.771345	-3.91723	-3.45245	-1.30271	0.0229554
M14930	SNP	GAGGTCCCTGCGCCGAAGCCCGC	23	11	G11C	1.96722	0.657548	0.894722	1.79241	0.530312	1.00709
M14931	SNP	GAGGTCCCTGTGCCGAAGCCCGC	23	11	G11T	0.911995	0.703931	0.723643	1.53598	0.931894	-1.07875
M15829	SNP	GCACCGTTGGCGAACGTGCATTG	23	11	A11C	#N/A	#N/A	#N/A	#N/A	#N/A	#N/A
M15830	SNP	GCACCGTTGGGGAACGTGCATTG	23	11	A11G	#N/A	#N/A	#N/A	#N/A	#N/A	#N/A
M15831	SNP	GCACCGTTGGTGAACGTGCATTG	23	11	A11T	-5.9865	-6.44821	-5.9469	-5.9865	-6.44821	1.66519
M16030	SNP	GCATCTAAGGAATGGACCATCGA	23	11	T11A	-3.51567	2.00287	0.869934	-4.13865	-2.77798	-2.9476
M16031	SNP	GCATCTAAGGCATGGACCATCGA	23	11	T11C	-3.40934	0.00618624	2.06999	-2.50818	0.884801	-2.96332
M16032	SNP	GCATCTAAGGGATGGACCATCGA	23	11	T11G	-5.09004	-2.25032	-1.06977	3.99451	2.28433	-2.10996
M16474	SNP	GTCGGTGATTACACCTCCAGTAT	23	11	T11A	-0.208902	5.13691	3.65276	1.19582	4.09347	0.991739
M16475	SNP	GTCGGTGATTCCACCTCCAGTAT	23	11	T11C	#N/A	#N/A	#N/A	#N/A	#N/A	#N/A
M16476	SNP	GTCGGTGATTGCACCTCCAGTAT	23	11	T11G	-3.74109	-6.44605	0.759687	-2.72738	1.90845	1.40311
M16603	SNP	GTTACCTACAAGTAGGAGCCAGT	23	11	G11A	-0.853645	-4.84973	-4.47676	-3.70297	-3.7304	-2.25829
M16604	SNP	GTTACCTACACGTAGGAGCCAGT	23	11	G11C	1.75228	1.52376	2.35073	0.0592638	-0.246145	-3.82408
M16605	SNP	GTTACCTACATGTAGGAGCCAGT	23	11	G11T	#N/A	#N/A	#N/A	#N/A	#N/A	#N/A
M16927	SNP	CTCAAATGTGCACCCATTTCCCA	23	11	A11C	1.00851	-0.317566	-0.735746	-0.862674	1.35827	-1.43495
M16928	SNP	CTCAAATGTGGACCCATTTCCCA	23	11	A11G	0.20804	-1.21224	2.25842	1.37815	-0.177192	-0.11045
M16929	SNP	CTCAAATGTGTACCCATTTCCCA	23	11	A11T	1.3587	0.610187	-0.136498	0.115359	-1.32966	-1.93038
M16996	SNP	CGAACGTTTTCCGAAGATTCGGT	23	11	A11C	-6.97508	-0.571857	4.10805	-6.97508	-2.43693	-6.28589
M16997	SNP	CGAACGTTTTGCGAAGATTCGGT	23	11	A11G	-1.04669	-3.37967	2.66306	-5.24954	-5.06319	3.819
M16998	SNP	CGAACGTTTTTCGAAGATTCGGT	23	11	A11T	#N/A	#N/A	#N/A	#N/A	#N/A	#N/A
M17506	SNP	CTATGGTTCCAGCGTTACCAAAA	23	11	G11A	2.2228	-2.5624	-4.32373	-0.353041	0.782456	1.76095
M17507	SNP	CTATGGTTCCCGCGTTACCAAAA	23	11	G11C	-4.92505	-2.63214	-1.78876	-1.04862	-0.976914	-5.19996
M17508	SNP	CTATGGTTCCTGCGTTACCAAAA	23	11	G11T	-2.45824	-3.82056	-4.67502	-0.20161	0.158591	5.04018
M17575	SNP	GGAGGGGACGCAGGTCTCGTTCT	23	11	A11C	0.82029	0.908769	0.00507338	1.79204	0.228739	1.3423
M17576	SNP	GGAGGGGACGGAGGTCTCGTTCT	23	11	A11G	2.07542	2.84525	0.72141	2.04976	-0.0444179	0.946137
M17577	SNP	GGAGGGGACGTAGGTCTCGTTCT	23	11	A11T	-0.0411902	2.53955	0.938051	-2.4416	0.542448	1.46049
M17764	SNP	GACTCACCCGATATTACGTCAGT	23	11	T11A	1.44145	0.609363	2.05396	-6.08955	-3.72406	0.31703
M17765	SNP	GACTCACCCGCTATTACGTCAGT	23	11	T11C	-4.66601	3.09491	-3.95581	-9.32337	-3.63965	-3.56175
M17766	SNP	GACTCACCCGGTATTACGTCAGT	23	11	T11G	3.46576	2.24848	-3.78191	-0.37398	-5.79587	-4.16016
M14932	SNP	GAGGTCCCTGGACCGAAGCCCGC	23	12	G12A	-1.97439	1.55967	-1.7295	-1.92601	1.57254	-0.682563
M14933	SNP	GAGGTCCCTGGCCCGAAGCCCGC	23	12	G12C	-0.0114887	-0.226186	3.95846	1.9331	2.86825	-0.779236
M14934	SNP	GAGGTCCCTGGTCCGAAGCCCGC	23	12	G12T	2.66593	2.14031	0.88818	1.99296	2.39189	0.608332
M15832	SNP	GCACCGTTGGAAAACGTGCATTG	23	12	G12A	-3.37346	0.262625	-4.76449	-2.23322	-7.74576	-4.41253
M15833	SNP	GCACCGTTGGACAACGTGCATTG	23	12	G12C	-5.81434	-6.20155	0.395303	-9.52777	-2.44549	-8.91238
M15834	SNP	GCACCGTTGGATAACGTGCATTG	23	12	G12T	#N/A	#N/A	#N/A	#N/A	#N/A	#N/A
M16033	SNP	GCATCTAAGGTCTGGACCATCGA	23	12	A12C	-0.764567	0.376795	4.50232	-2.04716	1.49111	-2.76636
M16034	SNP	GCATCTAAGGTGTGGACCATCGA	23	12	A12G	-1.27819	1.53132	-1.10056	-3.35453	-2.03586	-0.385848
M16035	SNP	GCATCTAAGGTTTGGACCATCGA	23	12	A12T	-3.12565	-0.127987	-2.99478	0.897737	-2.44993	-3.36308
M16477	SNP	GTCGGTGATTTAACCTCCAGTAT	23	12	C12A	-4.0512	-5.15124	4.44035	-3.25125	-4.96007	-4.53304
M16478	SNP	GTCGGTGATTTGACCTCCAGTAT	23	12	C12G	4.02213	1.25647	-0.450428	0.787591	-4.56278	1.44196
M16479	SNP	GTCGGTGATTTTACCTCCAGTAT	23	12	C12T	-6.52575	-2.13872	-2.08014	0.767889	-5.95781	1.52579
M16606	SNP	GTTACCTACAGATAGGAGCCAGT	23	12	G12A	-0.934691	0.814231	1.10487	4.11814	-0.78025	0.796018
M16607	SNP	GTTACCTACAGCTAGGAGCCAGT	23	12	G12C	0.67101	1.57454	2.21008	0.211758	0.649194	-0.664398
M16608	SNP	GTTACCTACAGTTAGGAGCCAGT	23	12	G12T	0.88504	1.47506	1.69699	-1.52567	-0.25062	-0.760401
M15265	SNP	ACGGATGCTGGTTTATAAAACA	22	15	G15A	1.10455	2.91473	1.1825	1.02273	0.579817	4.63461
M15266	SNP	ACGGATGCTGGTTTCTAAAACA	22	15	G15C	1.19367	1.49156	1.45516	-0.28331	-2.28122	0.572792
M15267	SNP	ACGGATGCTGGTTTTTAAAACA	22	15	G15T	0.381335	-0.0137743	2.29347	0.105147	2.06065	1.47803
M15580	SNP	ATCTAACTTGATGTAAGTACCG	22	15	T15A	-0.808332	1.07851	0.368976	-1.01978	3.0301	0.316181
M15581	SNP	ATCTAACTTGATGTCAGTACCG	22	15	T15C	-1.6608	-1.54926	0.960788	-0.288141	1.78326	-0.0792199
M15582	SNP	ATCTAACTTGATGTGAGTACCG	22	15	T15G	-0.384662	-3.53769	0.61334	2.55491	2.95278	-2.90878
M15646	SNP	ACGTACGGCTCTCAAAGGAAGA	22	15	T15A	0.496037	0.955265	0.321512	1.47892	2.47874	-1.31
M15647	SNP	ACGTACGGCTCTCACAGGAAGA	22	15	T15C	-1.61068	2.31324	-0.538819	1.15591	2.43871	-0.133169
M15648	SNP	ACGTACGGCTCTCAGAGGAAGA	22	15	T15G	2.4585	-1.54655	0.417802	-3.95633	-4.50803	1.08669
M15712	SNP	GGCTGTAGCAGGAGAGTGCGTC	22	15	C15A	-3.91171	-9.04314	-6.07788	-3.96698	-2.99766	-2.88291
M15713	SNP	GGCTGTAGCAGGAGGGTGCGTC	22	15	C15G	-2.47383	-4.59948	-4.26498	1.17117	-4.39098	-4.83787
M15714	SNP	GGCTGTAGCAGGAGTGTGCGTC	22	15	C15T	-2.40712	2.56281	1.02628	-2.87025	2.45256	-1.73713
M15910	SNP	TGCGATTGCTGAGGAAATCGGG	22	15	G15A	-1.33922	0.763101	2.65885	-2.91002	-3.125	1.57518
M15911	SNP	TGCGATTGCTGAGGCAATCGGG	22	15	G15C	#N/A	#N/A	#N/A	#N/A	#N/A	#N/A
M15912	SNP	TGCGATTGCTGAGGTAATCGGG	22	15	G15T	-0.072404	3.16739	-0.931157	-4.14236	2.24653	-2.88694
M15976	SNP	ATGAAAGCACCGACACCTTTCT	22	15	C15A	-0.171568	2.6724	-2.71048	-3.6496	-2.58584	-3.39346
M15977	SNP	ATGAAAGCACCGACGCCTTTCT	22	15	C15G	-2.08368	-5.78002	-3.21372	-1.28372	-1.4883	1.6089
M15978	SNP	ATGAAAGCACCGACTCCTTTCT	22	15	C15T	-2.95311	0.90507	-3.94322	2.90389	3.54948	-2.74753
M16360	SNP	AGCGAGGTCCGTCCAACCGAAG	22	15	C15A	-3.53758	2.07986	-4.43198	-1.11252	2.02972	-4.03262
M16361	SNP	AGCGAGGTCCGTCCGACCGAAG	22	15	C15G	1.28136	0.734526	0.306016	0.4386	0.657023	0.775078
M16362	SNP	AGCGAGGTCCGTCCTACCGAAG	22	15	C15T	-0.133456	0.0828511	-2.0357	0.751339	0.262699	2.4803
M16684	SNP	GCGGATCACCGCTTACAGTAGC	22	15	C15A	3.40957	-5.01575	-1.71014	-1.67211	-4.65483	-0.763624
M16685	SNP	GCGGATCACCGCTTGCAGTAGC	22	15	C15G	#N/A	#N/A	#N/A	#N/A	#N/A	#N/A
M16686	SNP	GCGGATCACCGCTTTCAGTAGC	22	15	C15T	-0.677789	1.85277	-5.01952	-1.25059	-4.99513	0.619676
M16813	SNP	AAGCCTGTGAACGCAAGTTAGA	22	15	G15A	1.52473	-4.60572	0.737098	0.633842	-4.13926	1.86846
M16814	SNP	AAGCCTGTGAACGCCAGTTAGA	22	15	G15C	1.45127	-3.60743	-5.53877	-5.79981	-1.85077	-3.00773
M16815	SNP	AAGCCTGTGAACGCTAGTTAGA	22	15	G15T	#N/A	#N/A	#N/A	#N/A	#N/A	#N/A
M17137	SNP	GTGGGAGAAAACTCAACACCAG	22	15	C15A	0.327126	3.46541	1.84109	-0.264002	1.93884	-6.16654
M17138	SNP	GTGGGAGAAAACTCGACACCAG	22	15	C15G	3.78675	-2.91419	0.12159	-0.451836	-4.85178	0.00714343
M17139	SNP	GTGGGAGAAAACTCTACACCAG	22	15	C15T	-4.91543	2.25392	0.41697	-4.34794	-2.53155	-6.36381
M17266	SNP	AACAGTCTGGGTTGACACTTTA	22	15	C15A	-1.22968	4.63061	-2.51675	0.877151	0.180829	1.22913
M17267	SNP	AACAGTCTGGGTTGGCACTTTA	22	15	C15G	-2.64878	-0.260751	-0.251602	-0.235433	-1.05093	-1.4877
M17268	SNP	AACAGTCTGGGTTGTCACTTTA	22	15	C15T	1.70877	4.78154	0.634399	-2.46747	-1.11088	-2.66545
M17452	SNP	GTAACGGTTGCTTGATCAGCGA	22	15	T15A	-4.30829	-5.26801	-1.68935	3.12396	-3.55525	-2.46787
M17453	SNP	GTAACGGTTGCTTGCTCAGCGA	22	15	T15C	-0.218345	-1.16909	-0.296644	-0.0411597	0.383589	-6.05112
M17454	SNP	GTAACGGTTGCTTGGTCAGCGA	22	15	T15G	-7.27475	-2.27487	-4.26972	0.577892	-5.02884	-4.44481
M15013	SNP	CTCATAGGAAGAAACACTTGAA	22	16	T16A	-2.06317	-0.117283	-4.33626	-0.460832	-2.00857	-0.52908
M15014	SNP	CTCATAGGAAGAAACCCTTGAA	22	16	T16C	-3.6976	-3.27103	0.0576001	1.70554	0.87908	-3.59751
M15015	SNP	CTCATAGGAAGAAACGCTTGAA	22	16	T16G	-1.33665	-1.52145	-2.38748	-1.04064	-1.30855	0.72118
M15079	SNP	AGCAAGACGGAAACCAGAGGTA	22	16	C16A	-3.28711	-2.00971	-3.71366	-4.11978	0.292743	-3.77231
M15080	SNP	AGCAAGACGGAAACCGGAGGTA	22	16	C16G	-4.66582	-4.83718	-3.47162	-5.52091	-0.687073	-4.05956
M15081	SNP	AGCAAGACGGAAACCTGAGGTA	22	16	C16T	-2.2873	-1.2155	-0.704358	-3.81075	-0.632808	1.76419
M15268	SNP	ACGGATGCTGGTTTGAAAAACA	22	16	T16A	-1.53048	-1.56989	0.879108	1.02882	-0.0963902	-4.96273
M15269	SNP	ACGGATGCTGGTTTGCAAAACA	22	16	T16C	-0.0124625	0.402025	0.48457	0.801998	2.81002	-0.969205
M15270	SNP	ACGGATGCTGGTTTGGAAAACA	22	16	T16G	-1.93425	0.817597	-1.31051	-0.0159003	-0.79901	1.77889
M15583	SNP	ATCTAACTTGATGTTCGTACCG	22	16	A16C	-0.0454691	-0.267546	-2.3291	4.22283	4.08601	-2.95225
M15584	SNP	ATCTAACTTGATGTTGGTACCG	22	16	A16G	0.216448	-3.90789	-1.53357	-0.490024	-2.74355	-0.133018
M15585	SNP	ATCTAACTTGATGTTTGTACCG	22	16	A16T	-0.772328	2.39196	1.0606	1.76455	1.47284	-2.97019
M15649	SNP	ACGTACGGCTCTCATCGGAAGA	22	16	A16C	-1.58812	-0.0321722	-0.545507	2.90484	0.750063	2.01105
M15650	SNP	ACGTACGGCTCTCATGGGAAGA	22	16	A16G	-3.55626	-3.67691	3.14773	2.09477	3.90094	-0.901722
M15651	SNP	ACGTACGGCTCTCATTGGAAGA	22	16	A16T	1.35494	-0.451922	2.69797	3.40723	0.711612	1.25939
M15715	SNP	GGCTGTAGCAGGAGCATGCGTC	22	16	G16A	0.423607	-3.17997	-4.35895	-0.0527096	-3.24624	-0.309786
M15716	SNP	GGCTGTAGCAGGAGCCTGCGTC	22	16	G16C	-3.28935	-4.17108	0.600467	-1.65409	-0.681261	-2.6098
M15717	SNP	GGCTGTAGCAGGAGCTTGCGTC	22	16	G16T	-0.67752	-1.29091	-4.97575	2.8508	1.86288	-4.17257
M15913	SNP	TGCGATTGCTGAGGGCATCGGG	22	16	A16C	-3.91148	-1.28834	-2.42994	-0.980404	-3.9043	0.418479
M15914	SNP	TGCGATTGCTGAGGGGATCGGG	22	16	A16G	-0.354698	-2.56759	-1.52032	-3.44905	-4.27217	0.340872
M15915	SNP	TGCGATTGCTGAGGGTATCGGG	22	16	A16T	-1.17838	-5.1574	-4.13107	-4.30823	1.90978	3.14868
M15979	SNP	ATGAAAGCACCGACCACTTTCT	22	16	C16A	-5.0283	-4.0539	3.50733	-3.04251	0.225904	-4.33963
M15980	SNP	ATGAAAGCACCGACCGCTTTCT	22	16	C16G	#N/A	#N/A	#N/A	#N/A	#N/A	#N/A
M15981	SNP	ATGAAAGCACCGACCTCTTTCT	22	16	C16T	2.1056	1.23499	1.62422	-0.165621	-3.04258	-0.500649
M16363	SNP	AGCGAGGTCCGTCCCCCCGAAG	22	16	A16C	1.48748	1.65627	0.615596	1.11974	2.94183	1.7531
M16364	SNP	AGCGAGGTCCGTCCCGCCGAAG	22	16	A16G	-0.88595	1.14593	1.00575	-0.120541	1.6722	1.1335
M16365	SNP	AGCGAGGTCCGTCCCTCCGAAG	22	16	A16T	1.51834	1.48528	0.57557	2.93026	1.34844	1.48486
M16687	SNP	GCGGATCACCGCTTCAAGTAGC	22	16	C16A	2.17778	-3.37967	-0.971668	-2.61056	-4.13503	-3.70301
M16688	SNP	GCGGATCACCGCTTCGAGTAGC	22	16	C16G	#N/A	#N/A	#N/A	#N/A	#N/A	#N/A
M16689	SNP	GCGGATCACCGCTTCTAGTAGC	22	16	C16T	#N/A	#N/A	#N/A	#N/A	#N/A	#N/A
M15136	SNP	TTAGAGCTGATCAATTCAGCG	21	13	C13A	3.086	-0.103084	-2.00252	-3.41524	1.99399	4.05164
M15137	SNP	TTAGAGCTGATCGATTCAGCG	21	13	C13G	#N/A	#N/A	#N/A	#N/A	#N/A	#N/A
M15138	SNP	TTAGAGCTGATCTATTCAGCG	21	13	C13T	1.79486	-1.31243	1.75769	-2.79925	4.38518	0.500979
M15325	SNP	GCTAACGCATCTCAGGTATGG	21	13	A13C	2.80134	0.5567	0.3401	0.466282	-2.35166	1.17591
M15326	SNP	GCTAACGCATCTGAGGTATGG	21	13	A13G	1.5405	2.95547	1.55433	1.57203	0.44785	1.51108
M15327	SNP	GCTAACGCATCTTAGGTATGG	21	13	A13T	2.46543	3.1328	-0.0892471	2.69367	1.29449	-0.831593
M15388	SNP	ACGGTTGCTTGTACAGCGAAC	21	13	T13A	1.3452	0.873689	1.80116	1.41648	0.429033	1.59248
M15389	SNP	ACGGTTGCTTGTCCAGCGAAC	21	13	T13C	-3.10805	-1.3455	1.2971	-4.94356	-4.31012	-0.443644
M15390	SNP	ACGGTTGCTTGTGCAGCGAAC	21	13	T13G	#N/A	#N/A	#N/A	#N/A	#N/A	#N/A
M15511	SNP	CGTCGCGAGTTGAGAGGCTGT	21	13	T13A	0.269794	0.302598	-0.74577	0.500285	-0.198337	0.584151
M15512	SNP	CGTCGCGAGTTGCGAGGCTGT	21	13	T13C	-0.619476	-1.03986	-0.187987	-0.135044	-2.60033	0.960597
M15513	SNP	CGTCGCGAGTTGGGAGGCTGT	21	13	T13G	-0.519653	-0.36313	-1.08899	0.00113438	-1.73545	0.583169
M15772	SNP	CTCGCGAAAGAGACCGGACAC	21	13	C13A	-1.18486	-0.139458	-1.79187	-0.819962	-0.413696	-0.995123
M15773	SNP	CTCGCGAAAGAGGCCGGACAC	21	13	C13G	-0.728616	-0.112573	-0.500065	-0.408349	0.388017	-2.37688
M15774	SNP	CTCGCGAAAGAGTCCGGACAC	21	13	C13T	-3.7586	-3.24143	-0.344883	1.7069	0.697986	-0.732007
M16165	SNP	GAGGGAGAAGCCAAAACCGGC	21	13	G13A	-1.11684	-4.92098	-1.39334	0.721784	-0.870121	0.248997
M16166	SNP	GAGGGAGAAGCCCAAACCGGC	21	13	G13C	1.5256	-0.0671046	5.70778	3.71955	-3.5599	-1.82395
M16167	SNP	GAGGGAGAAGCCTAAACCGGC	21	13	G13T	-3.23427	-0.522524	0.0215944	-0.100543	0.00662053	0.775973
M16228	SNP	CCACGGTAAAAGAGCGCGCCG	21	13	T13A	0.393892	0.627859	0.174839	-1.6786	1.72518	-0.0113802
M16229	SNP	CCACGGTAAAAGCGCGCGCCG	21	13	T13C	-0.496416	0.129744	-2.43213	-0.689563	-1.5389	-2.21413
M16230	SNP	CCACGGTAAAAGGGCGCGCCG	21	13	T13G	0.0711372	-2.76401	-1.09547	0.876218	-1.80338	-1.65065
M16291	SNP	CCGGCGTTAGCCCCTCCGAAG	21	13	A13C	1.67663	1.21103	0.783937	1.7504	-0.50641	1.96366
M16292	SNP	CCGGCGTTAGCCGCTCCGAAG	21	13	A13G	2.87311	-3.68434	1.49007	2.01426	0.25643	-3.77693
M16293	SNP	CCGGCGTTAGCCTCTCCGAAG	21	13	A13T	2.59132	2.65556	-7.01494	-6.27823	-1.57779	0.0157769
M16744	SNP	ACCAACGGATTTAAGCCGGCG	21	13	G13A	-1.77819	-3.55013	1.79362	-2.39264	-2.77049	-4.06193
M16745	SNP	ACCAACGGATTTCAGCCGGCG	21	13	G13C	-2.39296	1.55103	1.39272	0.72885	-3.18057	1.86188
M16746	SNP	ACCAACGGATTTTAGCCGGCG	21	13	G13T	1.3976	1.39485	-0.982576	2.14459	-1.75128	2.71167
M17197	SNP	GCTTCCAGTAGCAACAGAAGC	21	13	G13A	#N/A	#N/A	#N/A	#N/A	#N/A	#N/A
M17198	SNP	GCTTCCAGTAGCCACAGAAGC	21	13	G13C	#N/A	#N/A	#N/A	#N/A	#N/A	#N/A
M17199	SNP	GCTTCCAGTAGCTACAGAAGC	21	13	G13T	#N/A	#N/A	#N/A	#N/A	#N/A	#N/A
M17839	SNP	CAGGCTCCTTACCGGCAGCCC	21	13	A13C	-3.93929	-4.55459	1.95486	-4.08327	-3.79274	-1.40425
M17840	SNP	CAGGCTCCTTACGGGCAGCCC	21	13	A13G	-4.62963	-4.18058	2.79933	-3.43052	-0.249647	0.271609
M17841	SNP	CAGGCTCCTTACTGGCAGCCC	21	13	A13T	#N/A	#N/A	#N/A	#N/A	#N/A	#N/A
M17902	SNP	TTGAGCAGGACCACGAAAGGG	21	13	C13A	0.722851	0.22897	1.36725	1.42624	-0.19743	-0.0459315
M17903	SNP	TTGAGCAGGACCGCGAAAGGG	21	13	C13G	0.571333	0.432148	1.3021	0.265178	0.499899	1.55444
M17904	SNP	TTGAGCAGGACCTCGAAAGGG	21	13	C13T	1.76598	1.71919	2.81593	1.50973	-4.39877	-1.64886
M18025	SNP	GAAGAGATTGTCCACAGGTTT	21	13	A13C	0.370821	1.07426	0.936916	2.66154	1.91074	0.537975
M18026	SNP	GAAGAGATTGTCGACAGGTTT	21	13	A13G	0.728007	-0.363258	1.38191	0.82045	1.62755	-0.999972
M18027	SNP	GAAGAGATTGTCTACAGGTTT	21	13	A13T	-0.0273391	1.01052	2.0719	1.02313	2.11344	2.46322
M18088	SNP	TAGCCATGGTAGAGTCTCGCT	21	13	C13A	-0.0710726	2.46769	1.61714	-0.85905	-0.00176591	-0.753304
M18089	SNP	TAGCCATGGTAGGGTCTCGCT	21	13	C13G	0.604836	-0.348983	-0.657987	0.447078	0.369429	-1.11122
M18090	SNP	TAGCCATGGTAGTGTCTCGCT	21	13	C13T	0.01646	2.63661	1.49347	-3.40066	-0.0353855	2.362
M15139	SNP	TTAGAGCTGATCCCTTCAGCG	21	14	A14C	-1.07821	3.53616	2.50644	2.41715	5.1728	2.8671
M15140	SNP	TTAGAGCTGATCCGTTCAGCG	21	14	A14G	2.07074	3.63668	1.65121	-0.39839	1.44953	-1.89567
M15141	SNP	TTAGAGCTGATCCTTTCAGCG	21	14	A14T	-3.09595	-7.85737	0.842364	-3.75985	-2.28861	-7.82915
M15328	SNP	GCTAACGCATCTACGGTATGG	21	14	A14C	1.29085	-1.39403	2.84898	-3.41478	-0.71072	1.95239
M15329	SNP	GCTAACGCATCTAGGGTATGG	21	14	A14G	1.35361	1.47439	2.22555	1.90215	2.85491	2.58088
M15330	SNP	GCTAACGCATCTATGGTATGG	21	14	A14T	-0.0582792	1.33261	1.67056	1.45504	-1.74012	-0.00896197
M15391	SNP	ACGGTTGCTTGTTAAGCGAAC	21	14	C14A	-2.87987	-6.41211	0.78446	-3.54377	-6.41211	0.0661015
M15392	SNP	ACGGTTGCTTGTTGAGCGAAC	21	14	C14G	-6.83425	-7.96096	-7.49767	-6.83425	-7.96096	-4.41253
M15393	SNP	ACGGTTGCTTGTTTAGCGAAC	21	14	C14T	#N/A	#N/A	#N/A	#N/A	#N/A	#N/A
M15514	SNP	CGTCGCGAGTTGTAAGGCTGT	21	14	G14A	0.494837	-1.08027	1.07225	-0.12868	1.60388	1.17817
M15515	SNP	CGTCGCGAGTTGTCAGGCTGT	21	14	G14C	-0.0594963	0.491489	0.477687	0.44414	0.123596	0.314454
M15516	SNP	CGTCGCGAGTTGTTAGGCTGT	21	14	G14T	0.930461	-0.24258	0.303536	-0.201096	-0.0325633	0.355135
M15775	SNP	CTCGCGAAAGAGCACGGACAC	21	14	C14A	0.678165	-3.0474	-0.399856	-1.91369	0.0127446	-1.6459
M15776	SNP	CTCGCGAAAGAGCGCGGACAC	21	14	C14G	-8.59666	-1.96605	-4.34652	0.0257213	-5.31947	-3.96017
M15777	SNP	CTCGCGAAAGAGCTCGGACAC	21	14	C14T	-2.96651	-3.10311	-0.439831	-2.28253	-4.81289	-1.38269
M16168	SNP	GAGGGAGAAGCCGCAACCGGC	21	14	A14C	1.23602	1.93538	-0.509303	1.50947	0.315723	1.60613
M16169	SNP	GAGGGAGAAGCCGGAACCGGC	21	14	A14G	-3.08369	-3.6736	0.232345	3.62513	-3.80694	-4.49363
M16170	SNP	GAGGGAGAAGCCGTAACCGGC	21	14	A14T	-0.138733	-0.9048	-0.690774	-4.18155	-2.56946	2.9173
M16231	SNP	CCACGGTAAAAGTACGCGCCG	21	14	G14A	1.00319	-0.877853	-1.33344	2.11389	0.508606	0.362564
M16232	SNP	CCACGGTAAAAGTCCGCGCCG	21	14	G14C	-0.0566795	-0.237443	1.16638	1.64805	0.116963	0.527896
M16233	SNP	CCACGGTAAAAGTTCGCGCCG	21	14	G14T	1.30447	1.53987	0.0261466	1.70458	-1.00033	-1.03771
M16816	SNP	AAGCCTGTGAACGCGCGTTAGA	22	16	A16C	-3.75019	-2.35653	1.67315	1.04802	-1.35814	0.73741
M16817	SNP	AAGCCTGTGAACGCGGGTTAGA	22	16	A16G	-0.867619	0.12087	1.20009	-0.95184	-2.67767	-0.910656
M16818	SNP	AAGCCTGTGAACGCGTGTTAGA	22	16	A16T	2.19738	-5.09419	0.228382	0.296786	-4.17195	-1.31191
M17140	SNP	GTGGGAGAAAACTCCCCACCAG	22	16	A16C	#N/A	#N/A	#N/A	#N/A	#N/A	#N/A
M17141	SNP	GTGGGAGAAAACTCCGCACCAG	22	16	A16G	#N/A	#N/A	#N/A	#N/A	#N/A	#N/A
M17142	SNP	GTGGGAGAAAACTCCTCACCAG	22	16	A16T	2.38404	-1.77139	1.2685	2.39777	-2.54998	0.517403
M17269	SNP	AACAGTCTGGGTTGCAACTTTA	22	16	C16A	2.38417	-1.35052	1.04315	1.04548	-2.39821	-3.50953
M17270	SNP	AACAGTCTGGGTTGCGACTTTA	22	16	C16G	-3.15373	0.760713	-3.3132	2.85939	1.99669	-4.39378
M17271	SNP	AACAGTCTGGGTTGCTACTTTA	22	16	C16T	0.920959	-1.37812	-1.25956	-1.10911	0.251971	-0.451051
M17455	SNP	GTAACGGTTGCTTGTACAGCGA	22	16	T16A	0.558464	-2.65667	2.85755	0.169133	-1.4189	2.65539
M17456	SNP	GTAACGGTTGCTTGTCCAGCGA	22	16	T16C	-3.65083	-5.13167	-4.88936	2.03002	-2.06867	-3.07047
M17457	SNP	GTAACGGTTGCTTGTGCAGCGA	22	16	T16G	1.22873	-3.97094	-2.52377	2.62921	-3.12898	-2.85192
M15016	SNP	CTCATAGGAAGAAACTATTGAA	22	17	C17A	-0.861579	0.00551058	-2.39446	0.946267	-2.04536	-2.56265
M15017	SNP	CTCATAGGAAGAAACTGTTGAA	22	17	C17G	-1.425	1.57496	1.07261	-1.74127	-2.46048	-3.13453
M15018	SNP	CTCATAGGAAGAAACTTTTGAA	22	17	C17T	2.83572	-5.7794	-1.79021	1.83526	0.588192	-5.72292
M15082	SNP	AGCAAGACGGAAACCCAAGGTA	22	17	G17A	0.47004	2.09233	1.06837	1.79114	0.821638	0.145853
M15083	SNP	AGCAAGACGGAAACCCCAGGTA	22	17	G17C	-3.40045	1.097	2.42757	-0.10254	2.598	1.78933
M15084	SNP	AGCAAGACGGAAACCCTAGGTA	22	17	G17T	-1.52314	1.81327	1.96356	2.08671	2.37838	-0.790717
M15271	SNP	ACGGATGCTGGTTTGTCAAACA	22	17	A17C	1.14078	0.876207	2.22731	2.00306	0.962476	1.06427
M15272	SNP	ACGGATGCTGGTTTGTGAAACA	22	17	A17G	-1.61662	2.84537	2.47483	3.60603	-0.000358169	1.94215
M15273	SNP	ACGGATGCTGGTTTGTTAAACA	22	17	A17T	0.631189	4.53884	0.990464	2.6327	-0.296763	0.469157
M15586	SNP	ATCTAACTTGATGTTAATACCG	22	17	G17A	-2.05144	-0.838195	-0.503386	-1.90589	1.96879	-1.36615
M15587	SNP	ATCTAACTTGATGTTACTACCG	22	17	G17C	-1.82281	1.68252	1.40805	-3.81707	-0.916186	2.09182
M15588	SNP	ATCTAACTTGATGTTATTACCG	22	17	G17T	-0.501977	-3.43915	-0.0102157	0.874455	6.98563	0.380255
M15652	SNP	ACGTACGGCTCTCATAAGAAGA	22	17	G17A	3.9473	5.40203	0.472384	-0.594532	2.61209	-3.8582
M15653	SNP	ACGTACGGCTCTCATACGAAGA	22	17	G17C	-4.9191	-7.24847	-1.34936	-3.77886	-3.88491	4.08663
M15654	SNP	ACGTACGGCTCTCATATGAAGA	22	17	G17T	1.95779	2.48295	3.40856	-0.00252421	0.567122	1.05445
M15718	SNP	GGCTGTAGCAGGAGCGAGCGTC	22	17	T17A	-5.44451	-5.42442	-0.36477	-4.62043	-4.95796	-4.68326
M15719	SNP	GGCTGTAGCAGGAGCGCGCGTC	22	17	T17C	1.59124	-3.02978	-3.29997	3.86338	-1.47925	-3.18505
M15720	SNP	GGCTGTAGCAGGAGCGGGCGTC	22	17	T17G	-4.85386	2.23566	-4.02368	-3.08584	-2.85421	-1.34841
M15916	SNP	TGCGATTGCTGAGGGACTCGGG	22	17	A17C	-2.72143	-0.829827	-0.373012	-2.28824	1.66694	-3.92612
M15917	SNP	TGCGATTGCTGAGGGAGTCGGG	22	17	A17G	-1.56769	0.501233	1.59047	-2.11923	2.05751	-2.28205
M15918	SNP	TGCGATTGCTGAGGGATTCGGG	22	17	A17T	-0.390363	1.43607	-0.945469	0.173878	1.58292	1.31332
M15982	SNP	ATGAAAGCACCGACCCATTTCT	22	17	C17A	0.929266	2.00653	-0.288578	1.62599	0.691216	0.473327
M15983	SNP	ATGAAAGCACCGACCCGTTTCT	22	17	C17G	3.10213	2.51666	1.31564	2.92314	0.863472	2.92853
M15984	SNP	ATGAAAGCACCGACCCTTTTCT	22	17	C17T	-0.0672353	-0.701231	-0.264189	1.15929	0.555188	-3.10335
M16366	SNP	AGCGAGGTCCGTCCCAACGAAG	22	17	C17A	-0.899998	-0.920632	0.641305	-0.749778	-3.93723	1.24348
M16367	SNP	AGCGAGGTCCGTCCCAGCGAAG	22	17	C17G	0.119236	1.19714	-0.307405	-0.472887	1.79615	1.12419
M16368	SNP	AGCGAGGTCCGTCCCATCGAAG	22	17	C17T	2.36627	1.84704	-0.467979	-1.87703	-0.0297109	0.810892
M16690	SNP	GCGGATCACCGCTTCCCGTAGC	22	17	A17C	-4.59557	-5.27234	1.11902	0.663634	-8.44473	-8.12289
M16691	SNP	GCGGATCACCGCTTCCGGTAGC	22	17	A17G	#N/A	#N/A	#N/A	#N/A	#N/A	#N/A
M16692	SNP	GCGGATCACCGCTTCCTGTAGC	22	17	A17T	#N/A	#N/A	#N/A	#N/A	#N/A	#N/A
M16819	SNP	AAGCCTGTGAACGCGAATTAGA	22	17	G17A	1.78845	-0.162727	3.13786	-4.48362	-4.33729	-1.19096
M16820	SNP	AAGCCTGTGAACGCGACTTAGA	22	17	G17C	0.824137	-9.45158	-4.53536	3.9867	2.54952	-4.54382
M16821	SNP	AAGCCTGTGAACGCGATTTAGA	22	17	G17T	-0.47641	-0.724677	-0.90109	-6.82247	-3.88086	4.20898
M17143	SNP	GTGGGAGAAAACTCCAAACCAG	22	17	C17A	-3.07064	3.7945	-4.28225	1.13014	-2.41646	-7.01544
M17144	SNP	GTGGGAGAAAACTCCAGACCAG	22	17	C17G	-7.84024	-4.01331	-0.83719	1.88327	-7.1857	-0.743372
M17145	SNP	GTGGGAGAAAACTCCATACCAG	22	17	C17T	-2.9388	-3.13944	-6.44057	-0.0556502	2.73588	-6.08861
M17272	SNP	AACAGTCTGGGTTGCCCCTTTA	22	17	A17C	2.0879	-2.8759	-5.59224	-4.29404	-3.63126	-5.24028
M17273	SNP	AACAGTCTGGGTTGCCGCTTTA	22	17	A17G	1.21883	-3.30755	-2.77849	-2.95516	-2.62233	-3.36314
M17274	SNP	AACAGTCTGGGTTGCCTCTTTA	22	17	A17T	-3.81464	-4.72601	-3.68332	-4.12524	-3.36991	-3.43318
M17458	SNP	GTAACGGTTGCTTGTTAAGCGA	22	17	C17A	-3.61535	-4.89686	-3.79605	-3.36323	-3.77752	-3.8045
M17459	SNP	GTAACGGTTGCTTGTTGAGCGA	22	17	C17G	-5.62843	0.590157	1.33722	-3.51933	-5.93669	-5.52276
M17460	SNP	GTAACGGTTGCTTGTTTAGCGA	22	17	C17T	-1.41406	-1.54553	-1.18963	-2.4277	-1.4586	0.209386
M15019	SNP	CTCATAGGAAGAAACTCATGAA	22	18	T18A	0.776478	2.30863	-5.65122	0.466419	-3.86212	-1.354
M15020	SNP	CTCATAGGAAGAAACTCCTGAA	22	18	T18C	#N/A	#N/A	#N/A	#N/A	#N/A	#N/A
M15021	SNP	CTCATAGGAAGAAACTCGTGAA	22	18	T18G	0.756426	-1.22295	-2.64942	-7.01913	-8.04587	2.10597
M15085	SNP	AGCAAGACGGAAACCCGCGGTA	22	18	A18C	-2.88924	1.99582	0.863822	0.140669	2.69743	2.52042
M15086	SNP	AGCAAGACGGAAACCCGGGGTA	22	18	A18G	0.174274	0.282377	-0.380557	-2.24672	1.53642	0.209972
M15087	SNP	AGCAAGACGGAAACCCGTGGTA	22	18	A18T	-3.55762	0.843609	-3.86934	-0.831398	-0.983934	-0.549264
M15274	SNP	ACGGATGCTGGTTTGTACAACA	22	18	A18C	-3.11123	-1.12381	0.789871	-1.37147	0.554261	-0.887708
M15275	SNP	ACGGATGCTGGTTTGTAGAACA	22	18	A18G	-0.254862	1.66333	0.510176	1.31291	-5.327	-0.523267
M15276	SNP	ACGGATGCTGGTTTGTATAACA	22	18	A18T	1.26803	1.43651	4.37622	0.851304	-2.09633	0.881299
M15589	SNP	ATCTAACTTGATGTTAGAACCG	22	18	T18A	#N/A	#N/A	#N/A	#N/A	#N/A	#N/A
M15590	SNP	ATCTAACTTGATGTTAGCACCG	22	18	T18C	#N/A	#N/A	#N/A	#N/A	#N/A	#N/A
M15591	SNP	ATCTAACTTGATGTTAGGACCG	22	18	T18G	-5.3192	-2.99879	-1.73432	-0.942993	-2.79146	-3.94161
M16537	SNP	CCACGATGCCCCACTTCGCT	20	9	A9C	-0.41174	0.152338	0.750065	0.168723	1.24737	1.258
M16538	SNP	CCACGATGGCCCACTTCGCT	20	9	A9G	-3.38917	2.38963	-2.30734	1.24772	1.34828	-3.27324
M16539	SNP	CCACGATGTCCCACTTCGCT	20	9	A9T	0.822161	0.16012	1.15278	-0.0959002	2.80042	-0.274179
M16861	SNP	CGCAACGTACTGCGGCACTT	20	9	T9A	-1.3837	0.156097	-0.71496	-1.84066	1.91095	-0.00762692
M16862	SNP	CGCAACGTCCTGCGGCACTT	20	9	T9C	-0.350329	0.241715	-1.0239	-1.14506	1.47845	0.297994
M16863	SNP	CGCAACGTGCTGCGGCACTT	20	9	T9G	-0.66156	-1.71405	0.295239	0.794855	-0.827358	4.4202
M17059	SNP	ACGACCGGAAGTCCAGTTCG	20	9	G9A	0.715301	1.24135	-3.42083	-6.5933	-3.20102	-3.95609
M17060	SNP	ACGACCGGCAGTCCAGTTCG	20	9	G9C	0.837909	-4.62659	-2.21867	2.02914	-0.0463484	-0.981206
M17061	SNP	ACGACCGGTAGTCCAGTTCG	20	9	G9T	-7.65723	-1.87531	-2.11848	-0.873366	-1.92398	-3.46239
M17314	SNP	AGAGAAAGCTCGCGAGGAAG	20	9	A9C	1.62036	3.1816	2.09801	2.56893	-1.56974	1.03039
M17315	SNP	AGAGAAAGGTCGCGAGGAAG	20	9	A9G	-0.324658	2.5132	1.38424	-0.212836	1.94021	3.64166
M17316	SNP	AGAGAAAGTTCGCGAGGAAG	20	9	A9T	3.17013	2.03819	3.62394	3.38588	-0.0580721	2.69594
M17374	SNP	GTAGGGAGAGTCAACGCTTA	20	9	C9A	-0.0961376	1.70972	0.772671	0.0190425	2.38603	0.943486
M17375	SNP	GTAGGGAGGGTCAACGCTTA	20	9	C9G	-1.12563	2.32221	3.03072	0.468607	-1.89403	1.10704
M17376	SNP	GTAGGGAGTGTCAACGCTTA	20	9	C9T	2.33118	0.646919	0.533969	0.731634	1.6386	1.1899
M17638	SNP	ACTTTACGAACGCGCCAGTT	20	9	T9A	0.227064	2.21521	0.033585	2.25927	-2.92789	0.35606
M17639	SNP	ACTTTACGCACGCGCCAGTT	20	9	T9C	-2.47895	2.89158	-1.7525	-0.635539	-2.98409	-3.28899
M17640	SNP	ACTTTACGGACGCGCCAGTT	20	9	T9G	-3.55899	-1.3886	-2.7301	-3.30381	-3.43946	2.59158
M17698	SNP	GAAGAGATAGTCAACAGGTT	20	9	T9A	-0.104618	0.0168448	1.19522	1.33578	1.09346	1.02404
M17699	SNP	GAAGAGATCGTCAACAGGTT	20	9	T9C	0.930288	-0.131384	-0.110872	0.189253	-0.296134	0.763447
M17700	SNP	GAAGAGATGGTCAACAGGTT	20	9	T9G	0.54514	0.00938761	0.479095	-1.09602	0.979194	0.480526
M17953	SNP	CAGTATGGCACCACGCTATG	20	9	A9C	-0.102615	1.03173	1.09048	0.351942	0.887469	1.41417
M17954	SNP	CAGTATGGGACCACGCTATG	20	9	A9G	2.88423	-2.62336	0.810156	-1.90372	0.750334	-0.561081
M17955	SNP	CAGTATGGTACCACGCTATG	20	9	A9T	0.721005	2.44714	0.619035	1.49363	3.61977	1.49819
M15190	SNP	AGTATGGAAACACGCTATGT	20	10	C10A	-0.698753	-3.12607	0.33953	1.06479	-3.46311	-6.25995
M15191	SNP	AGTATGGAAGCACGCTATGT	20	10	C10G	1.23256	3.6015	0.181274	-3.78875	0.89245	-1.46375
M15192	SNP	AGTATGGAATCACGCTATGT	20	10	C10T	2.91448	1.36365	1.45318	2.62175	-1.10751	0.476991
M15442	SNP	CCTGCCGGCAACGTGTTTTG	20	10	C10A	0.396941	-1.0583	0.219513	1.11755	0.875495	1.65803
M15443	SNP	CCTGCCGGCGACGTGTTTTG	20	10	C10G	0.538497	1.83276	0.951043	0.0111754	0.862213	1.82981
M15444	SNP	CCTGCCGGCTACGTGTTTTG	20	10	C10T	1.566	1.4252	0.894909	2.48293	1.57493	1.10771
M16096	SNP	ATGCCGGAGATTGCTGCGAT	20	10	T10A	-0.986336	-1.53031	1.18178	3.34477	-2.02583	-0.66099
M16097	SNP	ATGCCGGAGCTTGCTGCGAT	20	10	T10C	0.0530387	3.04974	1.99402	0.211856	1.98766	-0.43969
M16098	SNP	ATGCCGGAGGTTGCTGCGAT	20	10	T10G	3.05318	-1.87843	-1.53958	0.818859	1.38656	0.137088
M16411	SNP	CGGATTGTAACCCTCGATGC	20	10	C10A	3.59639	1.22364	0.646606	-0.18418	2.38133	0.780119
M16412	SNP	CGGATTGTAGCCCTCGATGC	20	10	C10G	-1.6325	1.07561	-2.99181	2.04556	3.56362	1.55409
M16413	SNP	CGGATTGTATCCCTCGATGC	20	10	C10T	0.318252	0.575133	1.96385	-0.495723	4.46038	3.14532
M16540	SNP	CCACGATGAACCACTTCGCT	20	10	C10A	-0.188971	0.317399	-0.564899	-0.630639	0.628085	0.894906
M16541	SNP	CCACGATGAGCCACTTCGCT	20	10	C10G	#N/A	#N/A	#N/A	#N/A	#N/A	#N/A
M16542	SNP	CCACGATGATCCACTTCGCT	20	10	C10T	2.02449	1.8276	0.970342	1.70654	2.34756	0.491386
M16864	SNP	CGCAACGTTATGCGGCACTT	20	10	C10A	-5.26038	1.37298	0.45355	1.31572	-1.5666	1.30251
M16865	SNP	CGCAACGTTGTGCGGCACTT	20	10	C10G	-1.90036	-5.59954	2.79129	-6.39345	2.03728	0.304395
M16866	SNP	CGCAACGTTTTGCGGCACTT	20	10	C10T	-2.51471	-2.11038	0.402571	-0.610835	-3.51068	1.50088
M17062	SNP	ACGACCGGGCGTCCAGTTCG	20	10	A10C	-0.623906	3.18523	0.725362	-1.93914	-6.08356	-4.17506
M17063	SNP	ACGACCGGGGGTCCAGTTCG	20	10	A10G	-4.21029	-3.16273	1.07216	0.874089	-2.2876	-2.74003
M17064	SNP	ACGACCGGGTGTCCAGTTCG	20	10	A10T	#N/A	#N/A	#N/A	#N/A	#N/A	#N/A
M17317	SNP	AGAGAAAGAACGCGAGGAAG	20	10	T10A	2.35317	2.22344	2.25302	1.67199	2.73161	1.13237
M17318	SNP	AGAGAAAGACCGCGAGGAAG	20	10	T10C	2.57897	2.50208	1.23453	1.55877	2.54952	2.36749
M17319	SNP	AGAGAAAGAGCGCGAGGAAG	20	10	T10G	1.71669	3.49849	2.0896	1.50343	1.83136	2.69137
M17377	SNP	GTAGGGAGCATCAACGCTTA	20	10	G10A	1.01576	1.4327	0.664412	1.68523	1.9671	1.57912
M17378	SNP	GTAGGGAGCCTCAACGCTTA	20	10	G10C	2.35893	2.27167	2.44467	0.592598	1.53925	-2.18533
M17379	SNP	GTAGGGAGCTTCAACGCTTA	20	10	G10T	0.8516	2.67154	-1.7267	0.306007	2.22505	-2.55722
M17641	SNP	ACTTTACGTCCGCGCCAGTT	20	10	A10C	-0.51382	0.206966	1.601	0.939807	-3.02883	-1.54587
M17642	SNP	ACTTTACGTGCGCGCCAGTT	20	10	A10G	0.074848	-0.290097	-0.606954	0.537907	1.27244	-0.349284
M17643	SNP	ACTTTACGTTCGCGCCAGTT	20	10	A10T	2.59928	-4.82558	0.582681	2.96697	-3.14605	2.88965
M17701	SNP	GAAGAGATTATCAACAGGTT	20	10	G10A	2.23374	0.239495	1.49472	0.0433932	0.6512	2.12704
M17702	SNP	GAAGAGATTCTCAACAGGTT	20	10	G10C	1.03642	3.66786	-0.80406	2.45624	0.889219	1.60328
M17703	SNP	GAAGAGATTTTCAACAGGTT	20	10	G10T	3.16687	2.49874	1.59378	1.89278	3.06857	2.29508
M17956	SNP	CAGTATGGACCCACGCTATG	20	10	A10C	0.762294	2.5202	1.63591	-0.043428	2.6952	-1.80119
M17957	SNP	CAGTATGGAGCCACGCTATG	20	10	A10G	-2.87807	-0.67936	1.53008	-2.04612	3.38542	2.19264
M17958	SNP	CAGTATGGATCCACGCTATG	20	10	A10T	1.5513	0.276371	0.32701	1.0234	-1.49052	1.1097
M16930	SNP	CTCAAATGTGACCCCATTTCCCA	23	12	A12C	1.0175	-1.93792	1.42864	0.571401	-0.596097	-0.541196
[truncated: 1,217 more rows]

## Sheet: FigS9A
Position from 3' end	Avg10_23	Avg10_22	Avg10_21	Avg10_20
23	-1.62127	0	0	0
22	-0.657971	-1.65111	0	0
21	-0.83935	-0.693455	-0.466128	0
20	-0.621908	-1.01947	-0.197782	0.573944
19	-0.842342	-0.747283	-0.46005	0.258652
18	-0.760052	-0.632405	-0.434683	-0.23678
17	-0.856561	-0.775887	-0.430532	0.147368
16	-0.595604	-0.779283	-0.129545	-0.0304374
15	-0.697436	-0.690757	-0.196132	0.477189
14	-0.685237	-1.08889	-0.0782975	0.55416
13	-0.680079	-0.591562	-0.735206	0.626513
12	-0.235628	-0.576756	-0.437055	0.16979
11	-0.956447	-0.8991	-0.688477	0.614149
10	-0.0311297	-0.861674	-0.232985	0.192089
9	-0.248856	-0.303914	0.0822424	0.391203
8	-0.7913	-0.62927	-0.389376	0.564101
7	-0.913618	-1.10277	-0.0339357	0.254767
6	-0.503369	-0.783381	0.18517	0.289067
5	-0.763778	-0.569235	-0.712229	-0.052967
4	-1.09564	-1.18265	-0.652164	0.31744
3	-1.49031	-1.1205	-0.282945	-0.0656038
2	-0.593835	-0.319669	-0.0757336	0.307565
1	-0.310602	-0.557908	-0.359046	0.66732
Aligned to 3' end of targeting region

## Sheet: FigS9B
Position from 3' end	Avg100_23	Avg100_22	Avg100_21	Avg100_20
23	-1.72892	0	0	0
22	-1.56727	-1.6324	0	0
21	-1.05992	-0.824805	-0.41551	0
20	-0.968954	-0.990132	-0.607862	0.560191
19	-0.466277	-0.579871	-0.680681	0.215893
18	-0.588623	-0.275909	-0.674548	-0.476281
17	-0.833992	-0.619136	-0.473856	0.115273
16	-0.422406	-0.517284	0.0912666	-0.459295
15	-1.33492	-0.691591	-0.0279678	0.416262
14	-1.19795	-0.735976	-0.197339	0.577201
13	-1.11468	-0.792362	-0.242265	0.520021
12	-1.1113	-0.521187	-0.341509	0.358874
11	-1.56448	-1.00639	-0.219266	0.487723
10	-0.374379	-1.01462	-0.071439	0.130284
9	-1.15408	-0.704081	-0.239089	0.181951
8	-0.490839	-1.08123	-0.552212	0.371738
7	-1.01354	-0.487128	-0.148391	-0.006157
6	-0.157081	-1.0138	-0.431915	-0.519054
5	-1.29156	-1.12661	-0.399206	0.189146
4	-1.08098	-0.985651	-0.36369	0.0660984
3	-1.01389	-0.816894	-0.131975	-0.00415361
2	-1.03119	-0.418851	-0.140559	0.392111
1	-0.903957	-0.514648	-0.233256	0.441629
Aligned to 3' end of targeting region

## Sheet: FigS9D
Time (min)	Wt			23			22			21			20			19			18			17			16			15			14			13			12			11			10			9			8
0	0	0.00553395	0	0.00824196	0	0	0	0	0	0	0.00143591	0	0	0	0	0	0	0	0	0	0	0.000605366	0	0	0.00113621	0.00294071	0.011958	0.000972972	0.00142752	0	0.00310995	0.00784295	0	0.00864848	0.0249197	0	0	0	0	0	0	0.00426236	0	0	0	0	0.000951405	0	0.00242184
1	0.0113333	0.00896663	0.019433	0	0.00702929	0.00763634	0	0.0162175	0.0176426	0	0.0128717	0.00690426	0.00168537	0.00571043	0.0120462	0.0110199	0.00675479	0.00553728	0.0109936	0.0108746	0.0084861	0	0.00488477	0	0.0100628	0.00411471	0.0130765	0	0.00129512	0	0.0094287	0.00785815	0	0.0188183	0.0203969	0.0151127	0.0186458	0.0170581	0.0320638	0.0105697	0	0	0.00919087	0.00642051	0.0174069	0	0.0154314	0.00976207	0
2	0.0061954	0.00970595	0.0067907	0.0119119	0.017373	0.00919792	0.0161943	0.024752	0.00526628	0.00828616	0.0121399	0.017291	0	0.0198981	0.0167568	0.0122967	0.00405977	0.0144507	0.0083726	0.0124731	0.0165114	0.00551752	0.00792255	0	0.0101736	0.00202009	0	0.00611922	0.00515889	0	0.00764661	0.00395826	8.3607e-05	0.0321765	0	0.0187222	0	0	0	0	0.0183978	0.0158619	0.0155145	0	0.0172918	0.000137348	0	0	0.00599226
5	0.0183015	0.0103925	0.0246791	0.0154471	0.0448374	0.0643593	0.0406336	0.0406631	0.0555477	0.0330726	0.0289592	0.054356	0.0249323	0.039512	0.0436916	0.0197512	0.0137616	0.0229546	0.00970687	0.0138688	0	0.00302426	0.00506424	0	0.0154001	0.00468051	0	0.00876765	0.00684715	0.00259705	0	0.0115571	0	0.0215551	0.0198847	0.027475	0.00111948	0.0127522	0	0.0270041	0.0608385	0	0	0.0148649	0.0244764	0.00119107	0.00644128	0.0111071	0.0154964
10	0.0494516	0.0775916	0.0774036	0.0951488	0.12494	0.100853	0.0625497	0.107163	0.0942281	0.0742473	0.0580934	0.0674347	0.0665113	0.0850225	0.0794085	0.043993	0.0391354	0.0495333	0.019375	0.0205702	0.0197395	0.016383	0.00730402	0	0.0105416	0	0.00770811	0.00408989	0.010723	0	0	0.0259787	0	0.0315265	0.0180855	0.0161541	0.0156074	0.0285198	0.0161773	0.0550891	0.113749	0.129355	0	0.0383769	0.0387261	0	0.0219363	0.0177718	0.0328252
30	0.265554	0.203602	0.113017	0.31616	0.310356	0.31637	0.20686	0.294067	0.256385	0.23326	0.240674	0.354919	0.230059	0.228587	0.202888	0.147859	0.134829	0.128093	0.045306	0.0488777	0.0372108	0.0314419	0.0243897	0.00633556	0.0293344	0.0140791	0.0244091	0.0492861	0.069778	0.0855447	0.0187808	0.0146343	0	0.0501018	0.0564504	0.0608561	0.135086	0.144372	0.0854911	0.429414	0.462922	0.363099	0.0824175	0.142669	0.169198	0.0634093	0.0773455	0.105798	0.151171
60	0.296289	0.364605	0.276238	0.402908	0.436133	0.422194	0.296446	0.370091	0.358984	0.360538	0.297201	0.381816	0.214039	0.299273	0.273602	0.153387	0.175857	0.181431	0.0502893	0.0667329	0.0668235	0.039888	0.0284085	0.0634759	0.0336509	0.0176815	0.0382173	0.106943	0.0779406	0.127028	0.0307409	0.000485358	0.0101447	0.0393971	0.0392275	0.0663043	0.202762	0.179211	0.0790064	0.501287	0.40606	0.473863	0.156997	0.159146	0.205781	0.111937	0.18412	0.120227	0.181293
120	0.108264	0.566544	0.259905	0.371163	0.443119	0.324484	0.236584	0.70434	0.551379	0.304097	0.310693	0.304817	0.299715	0.340906	0.253222	0.165281	0.147608	0.132719	0.0381437	0.0603722	0.052456	0.0487182	0.0490524	0.0425893	0.0170324	0.0186387	0.0276126	0.0679974	0.0477928	0.173731	0.0256616	0.019611	0	0.0642395	0.0376392	0.0507794	0.216332	0.206628	0.113914	0.552563	0.44408	0.418786	0.19028	0.169581	0.161476	0.0954991	0.082921	0.118059	0.197464
Position from 3' end of targeting region	Fraction cleaved (mean)	SD
Wt	0.3409	0.05525
23	0.4178	0.01928
22	0.5575	0.09465
21	0.3426	0.02108
20	0.3039	0.01359
19	0.1656	0.007602
18	0.05617	0.003651
17	0.05373	0.008306
16	0.0257	0.003407
15	0.1097	0.01816
14	0.01374	0.003389
13	0.05116	0.004636
12	0.1924	0.02512
11	0.5027	0.03118
10	0.1886	0.01474
9	0.1217	0.01387
8	0.2993	0.03653
7	0.2082	0.02081
6	0.1842	0.0138
5	0.3598	0.02544
4	0.01134	0.004154
3	0	0
2	0	0
1	0.0649	0.01675
[truncated: 23 more columns]
