# Supplementary material for: RNA-dependent RNA targeting by CRISPR-Cas9
Source: eLife journal article supplement (doi:10.7554/elife.32724), 2018-01-05
Supplement: supp [file elife-32724-supp-v1.zip › elife_poa_e32724_Figure_3_source_data_1.xlsx]

## Sheet: list_of_sgRNAs
sgRNA	sequence (5' -> 3')	Targeting	Length
M1	TGGGTGGTAACTAGCCAAGC	MS2	20
M2	GGGTGGTAACTAGCCAAGCA	MS2	20
M3	GGTGGTAACTAGCCAAGCAG	MS2	20
M4	GTGGTAACTAGCCAAGCAGC	MS2	20
M5	TGGTAACTAGCCAAGCAGCT	MS2	20
M6	GGTAACTAGCCAAGCAGCTA	MS2	20
M7	GTAACTAGCCAAGCAGCTAG	MS2	20
M8	TAACTAGCCAAGCAGCTAGT	MS2	20
M9	AACTAGCCAAGCAGCTAGTT	MS2	20
M10	ACTAGCCAAGCAGCTAGTTA	MS2	20
M11	CTAGCCAAGCAGCTAGTTAC	MS2	20
M12	TAGCCAAGCAGCTAGTTACC	MS2	20
M13	AGCCAAGCAGCTAGTTACCA	MS2	20
M14	GCCAAGCAGCTAGTTACCAA	MS2	20
M15	CCAAGCAGCTAGTTACCAAA	MS2	20
M16	CAAGCAGCTAGTTACCAAAT	MS2	20
M17	AAGCAGCTAGTTACCAAATC	MS2	20
M18	AGCAGCTAGTTACCAAATCG	MS2	20
M19	GCAGCTAGTTACCAAATCGG	MS2	20
M20	CAGCTAGTTACCAAATCGGG	MS2	20
M21	AGCTAGTTACCAAATCGGGA	MS2	20
M22	GCTAGTTACCAAATCGGGAG	MS2	20
M23	CTAGTTACCAAATCGGGAGA	MS2	20
M24	TAGTTACCAAATCGGGAGAA	MS2	20
M25	AGTTACCAAATCGGGAGAAT	MS2	20
M26	GTTACCAAATCGGGAGAATC	MS2	20
M27	TTACCAAATCGGGAGAATCC	MS2	20
M28	TACCAAATCGGGAGAATCCC	MS2	20
M29	ACCAAATCGGGAGAATCCCG	MS2	20
M30	CCAAATCGGGAGAATCCCGG	MS2	20
M31	CAAATCGGGAGAATCCCGGG	MS2	20
M32	AAATCGGGAGAATCCCGGGT	MS2	20
M33	AATCGGGAGAATCCCGGGTC	MS2	20
M34	ATCGGGAGAATCCCGGGTCC	MS2	20
M35	TCGGGAGAATCCCGGGTCCT	MS2	20
M36	CGGGAGAATCCCGGGTCCTC	MS2	20
M37	GGGAGAATCCCGGGTCCTCT	MS2	20
M38	GGAGAATCCCGGGTCCTCTC	MS2	20
M39	GAGAATCCCGGGTCCTCTCT	MS2	20
M40	AGAATCCCGGGTCCTCTCTT	MS2	20
M41	GAATCCCGGGTCCTCTCTTT	MS2	20
M42	AATCCCGGGTCCTCTCTTTA	MS2	20
M43	ATCCCGGGTCCTCTCTTTAG	MS2	20
M44	TCCCGGGTCCTCTCTTTAGG	MS2	20
M45	CCCGGGTCCTCTCTTTAGGG	MS2	20
M46	CCGGGTCCTCTCTTTAGGGG	MS2	20
M47	CGGGTCCTCTCTTTAGGGGG	MS2	20
M48	GGGTCCTCTCTTTAGGGGGA	MS2	20
M49	GGTCCTCTCTTTAGGGGGAG	MS2	20
M50	GTCCTCTCTTTAGGGGGAGG	MS2	20
M51	TCCTCTCTTTAGGGGGAGGT	MS2	20
M52	CCTCTCTTTAGGGGGAGGTC	MS2	20
M53	CTCTCTTTAGGGGGAGGTCC	MS2	20
M54	TCTCTTTAGGGGGAGGTCCC	MS2	20
M55	CTCTTTAGGGGGAGGTCCCT	MS2	20
M56	TCTTTAGGGGGAGGTCCCTG	MS2	20
M57	CTTTAGGGGGAGGTCCCTGG	MS2	20
M58	TTTAGGGGGAGGTCCCTGGG	MS2	20
M59	TTAGGGGGAGGTCCCTGGGC	MS2	20
M60	TAGGGGGAGGTCCCTGGGCC	MS2	20
M61	AGGGGGAGGTCCCTGGGCCG	MS2	20
M62	GGGGGAGGTCCCTGGGCCGA	MS2	20
M63	GGGGAGGTCCCTGGGCCGAA	MS2	20
M64	GGGAGGTCCCTGGGCCGAAG	MS2	20
M65	GGAGGTCCCTGGGCCGAAGC	MS2	20
M66	GAGGTCCCTGGGCCGAAGCC	MS2	20
M67	AGGTCCCTGGGCCGAAGCCC	MS2	20
M68	GGTCCCTGGGCCGAAGCCCG	MS2	20
M69	GTCCCTGGGCCGAAGCCCGC	MS2	20
M70	TCCCTGGGCCGAAGCCCGCC	MS2	20
M71	CCCTGGGCCGAAGCCCGCCC	MS2	20
M72	CCTGGGCCGAAGCCCGCCCA	MS2	20
M73	CTGGGCCGAAGCCCGCCCAC	MS2	20
M74	TGGGCCGAAGCCCGCCCACC	MS2	20
M75	GGGCCGAAGCCCGCCCACCT	MS2	20
M76	GGCCGAAGCCCGCCCACCTT	MS2	20
M77	GCCGAAGCCCGCCCACCTTT	MS2	20
M78	CCGAAGCCCGCCCACCTTTC	MS2	20
M79	CGAAGCCCGCCCACCTTTCG	MS2	20
M80	GAAGCCCGCCCACCTTTCGG	MS2	20
M81	AAGCCCGCCCACCTTTCGGT	MS2	20
M82	AGCCCGCCCACCTTTCGGTG	MS2	20
M83	GCCCGCCCACCTTTCGGTGG	MS2	20
M84	CCCGCCCACCTTTCGGTGGA	MS2	20
M85	CCGCCCACCTTTCGGTGGAG	MS2	20
M86	CGCCCACCTTTCGGTGGAGC	MS2	20
M87	GCCCACCTTTCGGTGGAGCC	MS2	20
M88	CCCACCTTTCGGTGGAGCCG	MS2	20
M89	CCACCTTTCGGTGGAGCCGG	MS2	20
M90	CACCTTTCGGTGGAGCCGGA	MS2	20
M91	ACCTTTCGGTGGAGCCGGAC	MS2	20
M92	CCTTTCGGTGGAGCCGGACC	MS2	20
M93	CTTTCGGTGGAGCCGGACCG	MS2	20
M94	TTTCGGTGGAGCCGGACCGC	MS2	20
M95	TTCGGTGGAGCCGGACCGCT	MS2	20
M96	TCGGTGGAGCCGGACCGCTT	MS2	20
M97	CGGTGGAGCCGGACCGCTTT	MS2	20
M98	GGTGGAGCCGGACCGCTTTC	MS2	20
M99	GTGGAGCCGGACCGCTTTCG	MS2	20
M100	TGGAGCCGGACCGCTTTCGC	MS2	20
M101	GGAGCCGGACCGCTTTCGCA	MS2	20
M102	GAGCCGGACCGCTTTCGCAC	MS2	20
M103	AGCCGGACCGCTTTCGCACC	MS2	20
M104	GCCGGACCGCTTTCGCACCC	MS2	20
M105	CCGGACCGCTTTCGCACCCG	MS2	20
M106	CGGACCGCTTTCGCACCCGT	MS2	20
M107	GGACCGCTTTCGCACCCGTG	MS2	20
M108	GACCGCTTTCGCACCCGTGC	MS2	20
M109	ACCGCTTTCGCACCCGTGCT	MS2	20
M110	CCGCTTTCGCACCCGTGCTC	MS2	20
M111	CGCTTTCGCACCCGTGCTCT	MS2	20
M112	GCTTTCGCACCCGTGCTCTT	MS2	20
M113	CTTTCGCACCCGTGCTCTTT	MS2	20
M114	TTTCGCACCCGTGCTCTTTC	MS2	20
M115	TTCGCACCCGTGCTCTTTCG	MS2	20
M116	TCGCACCCGTGCTCTTTCGA	MS2	20
M117	CGCACCCGTGCTCTTTCGAG	MS2	20
M118	GCACCCGTGCTCTTTCGAGC	MS2	20
M119	CACCCGTGCTCTTTCGAGCA	MS2	20
M120	ACCCGTGCTCTTTCGAGCAC	MS2	20
M121	CCCGTGCTCTTTCGAGCACA	MS2	20
M122	CCGTGCTCTTTCGAGCACAC	MS2	20
M123	CGTGCTCTTTCGAGCACACC	MS2	20
M124	GTGCTCTTTCGAGCACACCC	MS2	20
M125	TGCTCTTTCGAGCACACCCA	MS2	20
M126	GCTCTTTCGAGCACACCCAC	MS2	20
M127	CTCTTTCGAGCACACCCACC	MS2	20
M128	TCTTTCGAGCACACCCACCC	MS2	20
M129	CTTTCGAGCACACCCACCCC	MS2	20
M130	TTTCGAGCACACCCACCCCG	MS2	20
M131	TTCGAGCACACCCACCCCGT	MS2	20
M132	TCGAGCACACCCACCCCGTT	MS2	20
M133	CGAGCACACCCACCCCGTTT	MS2	20
M134	GAGCACACCCACCCCGTTTA	MS2	20
M135	AGCACACCCACCCCGTTTAC	MS2	20
M136	GCACACCCACCCCGTTTACG	MS2	20
M137	CACACCCACCCCGTTTACGG	MS2	20
M138	ACACCCACCCCGTTTACGGG	MS2	20
M139	CACCCACCCCGTTTACGGGG	MS2	20
M140	ACCCACCCCGTTTACGGGGG	MS2	20
M141	CCCACCCCGTTTACGGGGGT	MS2	20
M142	CCACCCCGTTTACGGGGGTC	MS2	20
M143	CACCCCGTTTACGGGGGTCC	MS2	20
M144	ACCCCGTTTACGGGGGTCCC	MS2	20
M145	CCCCGTTTACGGGGGTCCCT	MS2	20
M146	CCCGTTTACGGGGGTCCCTC	MS2	20
M147	CCGTTTACGGGGGTCCCTCG	MS2	20
M148	CGTTTACGGGGGTCCCTCGG	MS2	20
M149	GTTTACGGGGGTCCCTCGGT	MS2	20
M150	TTTACGGGGGTCCCTCGGTC	MS2	20
M151	TTACGGGGGTCCCTCGGTCA	MS2	20
M152	TACGGGGGTCCCTCGGTCAG	MS2	20
M153	ACGGGGGTCCCTCGGTCAGC	MS2	20
M154	CGGGGGTCCCTCGGTCAGCT	MS2	20
M155	GGGGGTCCCTCGGTCAGCTA	MS2	20
M156	GGGGTCCCTCGGTCAGCTAC	MS2	20
M157	GGGTCCCTCGGTCAGCTACC	MS2	20
M158	GGTCCCTCGGTCAGCTACCG	MS2	20
M159	GTCCCTCGGTCAGCTACCGA	MS2	20
M160	TCCCTCGGTCAGCTACCGAG	MS2	20
M161	CCCTCGGTCAGCTACCGAGG	MS2	20
M162	CCTCGGTCAGCTACCGAGGA	MS2	20
M163	CTCGGTCAGCTACCGAGGAG	MS2	20
M164	TCGGTCAGCTACCGAGGAGA	MS2	20
M165	CGGTCAGCTACCGAGGAGAG	MS2	20
M166	GGTCAGCTACCGAGGAGAGC	MS2	20
M167	GTCAGCTACCGAGGAGAGCT	MS2	20
M168	TCAGCTACCGAGGAGAGCTC	MS2	20
M169	CAGCTACCGAGGAGAGCTCG	MS2	20
M170	AGCTACCGAGGAGAGCTCGC	MS2	20
M171	GCTACCGAGGAGAGCTCGCT	MS2	20
M172	CTACCGAGGAGAGCTCGCTG	MS2	20
M173	TACCGAGGAGAGCTCGCTGG	MS2	20
M174	ACCGAGGAGAGCTCGCTGGC	MS2	20
M175	CCGAGGAGAGCTCGCTGGCC	MS2	20
M176	CGAGGAGAGCTCGCTGGCCC	MS2	20
M177	GAGGAGAGCTCGCTGGCCCA	MS2	20
M178	AGGAGAGCTCGCTGGCCCAC	MS2	20
M179	GGAGAGCTCGCTGGCCCACA	MS2	20
M180	GAGAGCTCGCTGGCCCACAC	MS2	20
M181	AGAGCTCGCTGGCCCACACT	MS2	20
M182	GAGCTCGCTGGCCCACACTC	MS2	20
M183	AGCTCGCTGGCCCACACTCC	MS2	20
M184	GCTCGCTGGCCCACACTCCT	MS2	20
M185	CTCGCTGGCCCACACTCCTG	MS2	20
M186	TCGCTGGCCCACACTCCTGA	MS2	20
M187	CGCTGGCCCACACTCCTGAG	MS2	20
M188	GCTGGCCCACACTCCTGAGG	MS2	20
M189	CTGGCCCACACTCCTGAGGG	MS2	20
M190	TGGCCCACACTCCTGAGGGA	MS2	20
M191	GGCCCACACTCCTGAGGGAA	MS2	20
M192	GCCCACACTCCTGAGGGAAT	MS2	20
M193	CCCACACTCCTGAGGGAATG	MS2	20
M194	CCACACTCCTGAGGGAATGT	MS2	20
M195	CACACTCCTGAGGGAATGTG	MS2	20
M196	ACACTCCTGAGGGAATGTGG	MS2	20
M197	CACTCCTGAGGGAATGTGGG	MS2	20
M198	ACTCCTGAGGGAATGTGGGA	MS2	20
M199	CTCCTGAGGGAATGTGGGAA	MS2	20
M200	TCCTGAGGGAATGTGGGAAC	MS2	20
M201	CCTGAGGGAATGTGGGAACC	MS2	20
M202	CTGAGGGAATGTGGGAACCG	MS2	20
M203	TGAGGGAATGTGGGAACCGG	MS2	20
M204	GAGGGAATGTGGGAACCGGC	MS2	20
M205	AGGGAATGTGGGAACCGGCG	MS2	20
M206	GGGAATGTGGGAACCGGCGT	MS2	20
M207	GGAATGTGGGAACCGGCGTT	MS2	20
M208	GAATGTGGGAACCGGCGTTA	MS2	20
M209	AATGTGGGAACCGGCGTTAG	MS2	20
M210	ATGTGGGAACCGGCGTTAGC	MS2	20
M211	TGTGGGAACCGGCGTTAGCC	MS2	20
M212	GTGGGAACCGGCGTTAGCCA	MS2	20
M213	TGGGAACCGGCGTTAGCCAC	MS2	20
M214	GGGAACCGGCGTTAGCCACT	MS2	20
M215	GGAACCGGCGTTAGCCACTC	MS2	20
M216	GAACCGGCGTTAGCCACTCC	MS2	20
M217	AACCGGCGTTAGCCACTCCG	MS2	20
M218	ACCGGCGTTAGCCACTCCGA	MS2	20
M219	CCGGCGTTAGCCACTCCGAA	MS2	20
M220	CGGCGTTAGCCACTCCGAAG	MS2	20
M221	GGCGTTAGCCACTCCGAAGT	MS2	20
M222	GCGTTAGCCACTCCGAAGTG	MS2	20
M223	CGTTAGCCACTCCGAAGTGC	MS2	20
M224	GTTAGCCACTCCGAAGTGCG	MS2	20
M225	TTAGCCACTCCGAAGTGCGT	MS2	20
M226	TAGCCACTCCGAAGTGCGTA	MS2	20
M227	AGCCACTCCGAAGTGCGTAT	MS2	20
M228	GCCACTCCGAAGTGCGTATA	MS2	20
M229	CCACTCCGAAGTGCGTATAA	MS2	20
M230	CACTCCGAAGTGCGTATAAC	MS2	20
M231	ACTCCGAAGTGCGTATAACG	MS2	20
M232	CTCCGAAGTGCGTATAACGC	MS2	20
M233	TCCGAAGTGCGTATAACGCG	MS2	20
M234	CCGAAGTGCGTATAACGCGC	MS2	20
M235	CGAAGTGCGTATAACGCGCA	MS2	20
M236	GAAGTGCGTATAACGCGCAC	MS2	20
M237	AAGTGCGTATAACGCGCACG	MS2	20
M238	AGTGCGTATAACGCGCACGC	MS2	20
M239	GTGCGTATAACGCGCACGCC	MS2	20
M240	TGCGTATAACGCGCACGCCG	MS2	20
M241	GCGTATAACGCGCACGCCGG	MS2	20
M242	CGTATAACGCGCACGCCGGC	MS2	20
M243	GTATAACGCGCACGCCGGCG	MS2	20
M244	TATAACGCGCACGCCGGCGG	MS2	20
M245	ATAACGCGCACGCCGGCGGA	MS2	20
M246	TAACGCGCACGCCGGCGGAC	MS2	20
M247	AACGCGCACGCCGGCGGACT	MS2	20
M248	ACGCGCACGCCGGCGGACTT	MS2	20
M249	CGCGCACGCCGGCGGACTTC	MS2	20
M250	GCGCACGCCGGCGGACTTCA	MS2	20
M251	CGCACGCCGGCGGACTTCAT	MS2	20
M252	GCACGCCGGCGGACTTCATG	MS2	20
M253	CACGCCGGCGGACTTCATGC	MS2	20
M254	ACGCCGGCGGACTTCATGCT	MS2	20
M255	CGCCGGCGGACTTCATGCTG	MS2	20
M256	GCCGGCGGACTTCATGCTGT	MS2	20
M257	CCGGCGGACTTCATGCTGTC	MS2	20
M258	CGGCGGACTTCATGCTGTCG	MS2	20
M259	GGCGGACTTCATGCTGTCGG	MS2	20
M260	GCGGACTTCATGCTGTCGGT	MS2	20
M261	CGGACTTCATGCTGTCGGTG	MS2	20
M262	GGACTTCATGCTGTCGGTGA	MS2	20
M263	GACTTCATGCTGTCGGTGAT	MS2	20
M264	ACTTCATGCTGTCGGTGATT	MS2	20
M265	CTTCATGCTGTCGGTGATTT	MS2	20
M266	TTCATGCTGTCGGTGATTTC	MS2	20
M267	TCATGCTGTCGGTGATTTCA	MS2	20
M268	CATGCTGTCGGTGATTTCAC	MS2	20
M269	ATGCTGTCGGTGATTTCACC	MS2	20
M270	TGCTGTCGGTGATTTCACCT	MS2	20
M271	GCTGTCGGTGATTTCACCTC	MS2	20
M272	CTGTCGGTGATTTCACCTCC	MS2	20
M273	TGTCGGTGATTTCACCTCCA	MS2	20
M274	GTCGGTGATTTCACCTCCAG	MS2	20
M275	TCGGTGATTTCACCTCCAGT	MS2	20
M276	CGGTGATTTCACCTCCAGTA	MS2	20
M277	GGTGATTTCACCTCCAGTAT	MS2	20
M278	GTGATTTCACCTCCAGTATG	MS2	20
M279	TGATTTCACCTCCAGTATGG	MS2	20
M280	GATTTCACCTCCAGTATGGA	MS2	20
M281	ATTTCACCTCCAGTATGGAA	MS2	20
M282	TTTCACCTCCAGTATGGAAC	MS2	20
M283	TTCACCTCCAGTATGGAACC	MS2	20
M284	TCACCTCCAGTATGGAACCA	MS2	20
M285	CACCTCCAGTATGGAACCAC	MS2	20
M286	ACCTCCAGTATGGAACCACG	MS2	20
M287	CCTCCAGTATGGAACCACGC	MS2	20
M288	CTCCAGTATGGAACCACGCT	MS2	20
M289	TCCAGTATGGAACCACGCTA	MS2	20
M290	CCAGTATGGAACCACGCTAT	MS2	20
M291	CAGTATGGAACCACGCTATG	MS2	20
M292	AGTATGGAACCACGCTATGT	MS2	20
M293	GTATGGAACCACGCTATGTA	MS2	20
M294	TATGGAACCACGCTATGTAG	MS2	20
M295	ATGGAACCACGCTATGTAGC	MS2	20
M296	TGGAACCACGCTATGTAGCG	MS2	20
M297	GGAACCACGCTATGTAGCGA	MS2	20
M298	GAACCACGCTATGTAGCGAC	MS2	20
M299	AACCACGCTATGTAGCGACC	MS2	20
M300	ACCACGCTATGTAGCGACCA	MS2	20
M301	CCACGCTATGTAGCGACCAC	MS2	20
M302	CACGCTATGTAGCGACCACT	MS2	20
M303	ACGCTATGTAGCGACCACTG	MS2	20
M304	CGCTATGTAGCGACCACTGT	MS2	20
M305	GCTATGTAGCGACCACTGTC	MS2	20
M306	CTATGTAGCGACCACTGTCG	MS2	20
M307	TATGTAGCGACCACTGTCGT	MS2	20
M308	ATGTAGCGACCACTGTCGTG	MS2	20
M309	TGTAGCGACCACTGTCGTGC	MS2	20
M310	GTAGCGACCACTGTCGTGCT	MS2	20
M311	TAGCGACCACTGTCGTGCTT	MS2	20
M312	AGCGACCACTGTCGTGCTTT	MS2	20
M313	GCGACCACTGTCGTGCTTTT	MS2	20
M314	CGACCACTGTCGTGCTTTTC	MS2	20
M315	GACCACTGTCGTGCTTTTCG	MS2	20
M316	ACCACTGTCGTGCTTTTCGC	MS2	20
M317	CCACTGTCGTGCTTTTCGCT	MS2	20
M318	CACTGTCGTGCTTTTCGCTG	MS2	20
M319	ACTGTCGTGCTTTTCGCTGA	MS2	20
M320	CTGTCGTGCTTTTCGCTGAA	MS2	20
M321	TGTCGTGCTTTTCGCTGAAG	MS2	20
M322	GTCGTGCTTTTCGCTGAAGA	MS2	20
M323	TCGTGCTTTTCGCTGAAGAA	MS2	20
M324	CGTGCTTTTCGCTGAAGAAC	MS2	20
M325	GTGCTTTTCGCTGAAGAACT	MS2	20
M326	TGCTTTTCGCTGAAGAACTT	MS2	20
M327	GCTTTTCGCTGAAGAACTTG	MS2	20
M328	CTTTTCGCTGAAGAACTTGC	MS2	20
M329	TTTTCGCTGAAGAACTTGCG	MS2	20
M330	TTTCGCTGAAGAACTTGCGT	MS2	20
M331	TTCGCTGAAGAACTTGCGTT	MS2	20
M332	TCGCTGAAGAACTTGCGTTC	MS2	20
M333	CGCTGAAGAACTTGCGTTCT	MS2	20
M334	GCTGAAGAACTTGCGTTCTC	MS2	20
M335	CTGAAGAACTTGCGTTCTCG	MS2	20
M336	TGAAGAACTTGCGTTCTCGA	MS2	20
M337	GAAGAACTTGCGTTCTCGAG	MS2	20
M338	AAGAACTTGCGTTCTCGAGC	MS2	20
M339	AGAACTTGCGTTCTCGAGCG	MS2	20
M340	GAACTTGCGTTCTCGAGCGA	MS2	20
M341	AACTTGCGTTCTCGAGCGAT	MS2	20
M342	ACTTGCGTTCTCGAGCGATA	MS2	20
M343	CTTGCGTTCTCGAGCGATAC	MS2	20
M344	TTGCGTTCTCGAGCGATACG	MS2	20
M345	TGCGTTCTCGAGCGATACGA	MS2	20
M346	GCGTTCTCGAGCGATACGAG	MS2	20
M347	CGTTCTCGAGCGATACGAGC	MS2	20
M348	GTTCTCGAGCGATACGAGCA	MS2	20
M349	TTCTCGAGCGATACGAGCAA	MS2	20
M350	TCTCGAGCGATACGAGCAAG	MS2	20
M351	CTCGAGCGATACGAGCAAGA	MS2	20
M352	TCGAGCGATACGAGCAAGAC	MS2	20
M353	CGAGCGATACGAGCAAGACG	MS2	20
M354	GAGCGATACGAGCAAGACGG	MS2	20
M355	AGCGATACGAGCAAGACGGA	MS2	20
M356	GCGATACGAGCAAGACGGAA	MS2	20
M357	CGATACGAGCAAGACGGAAA	MS2	20
M358	GATACGAGCAAGACGGAAAC	MS2	20
M359	ATACGAGCAAGACGGAAACC	MS2	20
M360	TACGAGCAAGACGGAAACCC	MS2	20
M361	ACGAGCAAGACGGAAACCCG	MS2	20
M362	CGAGCAAGACGGAAACCCGA	MS2	20
M363	GAGCAAGACGGAAACCCGAG	MS2	20
M364	AGCAAGACGGAAACCCGAGG	MS2	20
M365	GCAAGACGGAAACCCGAGGT	MS2	20
M366	CAAGACGGAAACCCGAGGTA	MS2	20
M367	AAGACGGAAACCCGAGGTAC	MS2	20
M368	AGACGGAAACCCGAGGTACG	MS2	20
M369	GACGGAAACCCGAGGTACGG	MS2	20
M370	ACGGAAACCCGAGGTACGGG	MS2	20
M371	CGGAAACCCGAGGTACGGGT	MS2	20
M372	GGAAACCCGAGGTACGGGTA	MS2	20
M373	GAAACCCGAGGTACGGGTAT	MS2	20
M374	AAACCCGAGGTACGGGTATC	MS2	20
M375	AACCCGAGGTACGGGTATCC	MS2	20
M376	ACCCGAGGTACGGGTATCCG	MS2	20
M377	CCCGAGGTACGGGTATCCGC	MS2	20
M378	CCGAGGTACGGGTATCCGCG	MS2	20
M379	CGAGGTACGGGTATCCGCGA	MS2	20
M380	GAGGTACGGGTATCCGCGAG	MS2	20
M381	AGGTACGGGTATCCGCGAGC	MS2	20
M382	GGTACGGGTATCCGCGAGCA	MS2	20
M383	GTACGGGTATCCGCGAGCAG	MS2	20
M384	TACGGGTATCCGCGAGCAGC	MS2	20
M385	ACGGGTATCCGCGAGCAGCC	MS2	20
M386	CGGGTATCCGCGAGCAGCCG	MS2	20
M387	GGGTATCCGCGAGCAGCCGC	MS2	20
M388	GGTATCCGCGAGCAGCCGCC	MS2	20
M389	GTATCCGCGAGCAGCCGCCC	MS2	20
M390	TATCCGCGAGCAGCCGCCCG	MS2	20
M391	ATCCGCGAGCAGCCGCCCGT	MS2	20
M392	TCCGCGAGCAGCCGCCCGTA	MS2	20
M393	CCGCGAGCAGCCGCCCGTAC	MS2	20
M394	CGCGAGCAGCCGCCCGTACG	MS2	20
M395	GCGAGCAGCCGCCCGTACGG	MS2	20
M396	CGAGCAGCCGCCCGTACGGA	MS2	20
M397	GAGCAGCCGCCCGTACGGAG	MS2	20
M398	AGCAGCCGCCCGTACGGAGT	MS2	20
M399	GCAGCCGCCCGTACGGAGTC	MS2	20
M400	CAGCCGCCCGTACGGAGTCT	MS2	20
M401	AGCCGCCCGTACGGAGTCTT	MS2	20
M402	GCCGCCCGTACGGAGTCTTG	MS2	20
M403	CCGCCCGTACGGAGTCTTGG	MS2	20
M404	CGCCCGTACGGAGTCTTGGT	MS2	20
M405	GCCCGTACGGAGTCTTGGTG	MS2	20
M406	CCCGTACGGAGTCTTGGTGT	MS2	20
M407	CCGTACGGAGTCTTGGTGTA	MS2	20
M408	CGTACGGAGTCTTGGTGTAT	MS2	20
M409	GTACGGAGTCTTGGTGTATA	MS2	20
M410	TACGGAGTCTTGGTGTATAC	MS2	20
M411	ACGGAGTCTTGGTGTATACC	MS2	20
M412	CGGAGTCTTGGTGTATACCG	MS2	20
M413	GGAGTCTTGGTGTATACCGA	MS2	20
M414	GAGTCTTGGTGTATACCGAG	MS2	20
M415	AGTCTTGGTGTATACCGAGA	MS2	20
M416	GTCTTGGTGTATACCGAGAC	MS2	20
M417	TCTTGGTGTATACCGAGACT	MS2	20
M418	CTTGGTGTATACCGAGACTG	MS2	20
M419	TTGGTGTATACCGAGACTGC	MS2	20
M420	TGGTGTATACCGAGACTGCC	MS2	20
M421	GGTGTATACCGAGACTGCCG	MS2	20
M422	GTGTATACCGAGACTGCCGT	MS2	20
M423	TGTATACCGAGACTGCCGTA	MS2	20
M424	GTATACCGAGACTGCCGTAG	MS2	20
M425	TATACCGAGACTGCCGTAGG	MS2	20
M426	ATACCGAGACTGCCGTAGGC	MS2	20
M427	TACCGAGACTGCCGTAGGCG	MS2	20
M428	ACCGAGACTGCCGTAGGCGG	MS2	20
M429	CCGAGACTGCCGTAGGCGGG	MS2	20
M430	CGAGACTGCCGTAGGCGGGC	MS2	20
M431	GAGACTGCCGTAGGCGGGCT	MS2	20
M432	AGACTGCCGTAGGCGGGCTG	MS2	20
M433	GACTGCCGTAGGCGGGCTGA	MS2	20
M434	ACTGCCGTAGGCGGGCTGAC	MS2	20
M435	CTGCCGTAGGCGGGCTGACT	MS2	20
M436	TGCCGTAGGCGGGCTGACTA	MS2	20
M437	GCCGTAGGCGGGCTGACTAC	MS2	20
M438	CCGTAGGCGGGCTGACTACG	MS2	20
M439	CGTAGGCGGGCTGACTACGT	MS2	20
M440	GTAGGCGGGCTGACTACGTA	MS2	20
M441	TAGGCGGGCTGACTACGTAG	MS2	20
M442	AGGCGGGCTGACTACGTAGT	MS2	20
M443	GGCGGGCTGACTACGTAGTA	MS2	20
M444	GCGGGCTGACTACGTAGTAG	MS2	20
M445	CGGGCTGACTACGTAGTAGT	MS2	20
M446	GGGCTGACTACGTAGTAGTC	MS2	20
M447	GGCTGACTACGTAGTAGTCG	MS2	20
M448	GCTGACTACGTAGTAGTCGG	MS2	20
M449	CTGACTACGTAGTAGTCGGC	MS2	20
M450	TGACTACGTAGTAGTCGGCA	MS2	20
M451	GACTACGTAGTAGTCGGCAG	MS2	20
M452	ACTACGTAGTAGTCGGCAGC	MS2	20
M453	CTACGTAGTAGTCGGCAGCG	MS2	20
M454	TACGTAGTAGTCGGCAGCGA	MS2	20
M455	ACGTAGTAGTCGGCAGCGAG	MS2	20
M456	CGTAGTAGTCGGCAGCGAGG	MS2	20
M457	GTAGTAGTCGGCAGCGAGGT	MS2	20
M458	TAGTAGTCGGCAGCGAGGTC	MS2	20
M459	AGTAGTCGGCAGCGAGGTCC	MS2	20
M460	GTAGTCGGCAGCGAGGTCCG	MS2	20
M461	TAGTCGGCAGCGAGGTCCGT	MS2	20
M462	AGTCGGCAGCGAGGTCCGTC	MS2	20
M463	GTCGGCAGCGAGGTCCGTCC	MS2	20
M464	TCGGCAGCGAGGTCCGTCCC	MS2	20
M465	CGGCAGCGAGGTCCGTCCCA	MS2	20
M466	GGCAGCGAGGTCCGTCCCAC	MS2	20
M467	GCAGCGAGGTCCGTCCCACC	MS2	20
M468	CAGCGAGGTCCGTCCCACCG	MS2	20
M469	AGCGAGGTCCGTCCCACCGA	MS2	20
M470	GCGAGGTCCGTCCCACCGAA	MS2	20
M471	CGAGGTCCGTCCCACCGAAG	MS2	20
M472	GAGGTCCGTCCCACCGAAGA	MS2	20
M473	AGGTCCGTCCCACCGAAGAA	MS2	20
M474	GGTCCGTCCCACCGAAGAAC	MS2	20
M475	GTCCGTCCCACCGAAGAACA	MS2	20
M476	TCCGTCCCACCGAAGAACAT	MS2	20
M477	CCGTCCCACCGAAGAACATC	MS2	20
M478	CGTCCCACCGAAGAACATCG	MS2	20
M479	GTCCCACCGAAGAACATCGA	MS2	20
M480	TCCCACCGAAGAACATCGAA	MS2	20
M481	CCCACCGAAGAACATCGAAG	MS2	20
M482	CCACCGAAGAACATCGAAGG	MS2	20
M483	CACCGAAGAACATCGAAGGC	MS2	20
M484	ACCGAAGAACATCGAAGGCA	MS2	20
M485	CCGAAGAACATCGAAGGCAC	MS2	20
M486	CGAAGAACATCGAAGGCACC	MS2	20
M487	GAAGAACATCGAAGGCACCT	MS2	20
M488	AAGAACATCGAAGGCACCTG	MS2	20
M489	AGAACATCGAAGGCACCTGG	MS2	20
M490	GAACATCGAAGGCACCTGGG	MS2	20
M491	AACATCGAAGGCACCTGGGA	MS2	20
M492	ACATCGAAGGCACCTGGGAG	MS2	20
M493	CATCGAAGGCACCTGGGAGG	MS2	20
M494	ATCGAAGGCACCTGGGAGGA	MS2	20
M495	TCGAAGGCACCTGGGAGGAG	MS2	20
M496	CGAAGGCACCTGGGAGGAGA	MS2	20
M497	GAAGGCACCTGGGAGGAGAG	MS2	20
M498	AAGGCACCTGGGAGGAGAGC	MS2	20
M499	AGGCACCTGGGAGGAGAGCC	MS2	20
M500	GGCACCTGGGAGGAGAGCCG	MS2	20
M501	GCACCTGGGAGGAGAGCCGT	MS2	20
M502	CACCTGGGAGGAGAGCCGTA	MS2	20
M503	ACCTGGGAGGAGAGCCGTAC	MS2	20
M504	CCTGGGAGGAGAGCCGTACC	MS2	20
M505	CTGGGAGGAGAGCCGTACCC	MS2	20
M506	TGGGAGGAGAGCCGTACCCA	MS2	20
M507	GGGAGGAGAGCCGTACCCAC	MS2	20
M508	GGAGGAGAGCCGTACCCACA	MS2	20
M509	GAGGAGAGCCGTACCCACAC	MS2	20
M510	AGGAGAGCCGTACCCACACC	MS2	20
M511	GGAGAGCCGTACCCACACCT	MS2	20
M512	GAGAGCCGTACCCACACCTT	MS2	20
M513	AGAGCCGTACCCACACCTTA	MS2	20
M514	GAGCCGTACCCACACCTTAT	MS2	20
M515	AGCCGTACCCACACCTTATA	MS2	20
M516	GCCGTACCCACACCTTATAG	MS2	20
M517	CCGTACCCACACCTTATAGA	MS2	20
M518	CGTACCCACACCTTATAGAG	MS2	20
M519	GTACCCACACCTTATAGAGG	MS2	20
M520	TACCCACACCTTATAGAGGC	MS2	20
M521	ACCCACACCTTATAGAGGCG	MS2	20
M522	CCCACACCTTATAGAGGCGT	MS2	20
M523	CCACACCTTATAGAGGCGTG	MS2	20
M524	CACACCTTATAGAGGCGTGG	MS2	20
M525	ACACCTTATAGAGGCGTGGA	MS2	20
M526	CACCTTATAGAGGCGTGGAT	MS2	20
M527	ACCTTATAGAGGCGTGGATC	MS2	20
M528	CCTTATAGAGGCGTGGATCT	MS2	20
M529	CTTATAGAGGCGTGGATCTG	MS2	20
M530	TTATAGAGGCGTGGATCTGA	MS2	20
M531	TATAGAGGCGTGGATCTGAC	MS2	20
M532	ATAGAGGCGTGGATCTGACA	MS2	20
M533	TAGAGGCGTGGATCTGACAT	MS2	20
M534	AGAGGCGTGGATCTGACATA	MS2	20
M535	GAGGCGTGGATCTGACATAC	MS2	20
M536	AGGCGTGGATCTGACATACC	MS2	20
M537	GGCGTGGATCTGACATACCT	MS2	20
M538	GCGTGGATCTGACATACCTC	MS2	20
M539	CGTGGATCTGACATACCTCC	MS2	20
M540	GTGGATCTGACATACCTCCG	MS2	20
M541	TGGATCTGACATACCTCCGA	MS2	20
M542	GGATCTGACATACCTCCGAC	MS2	20
M543	GATCTGACATACCTCCGACA	MS2	20
M544	ATCTGACATACCTCCGACAA	MS2	20
M545	TCTGACATACCTCCGACAAC	MS2	20
M546	CTGACATACCTCCGACAACT	MS2	20
M547	TGACATACCTCCGACAACTC	MS2	20
M548	GACATACCTCCGACAACTCC	MS2	20
M549	ACATACCTCCGACAACTCCC	MS2	20
M550	CATACCTCCGACAACTCCCC	MS2	20
M551	ATACCTCCGACAACTCCCCA	MS2	20
M552	TACCTCCGACAACTCCCCAA	MS2	20
M553	ACCTCCGACAACTCCCCAAC	MS2	20
M554	CCTCCGACAACTCCCCAACC	MS2	20
M555	CTCCGACAACTCCCCAACCC	MS2	20
M556	TCCGACAACTCCCCAACCCC	MS2	20
M557	CCGACAACTCCCCAACCCCG	MS2	20
M558	CGACAACTCCCCAACCCCGT	MS2	20
M559	GACAACTCCCCAACCCCGTA	MS2	20
M560	ACAACTCCCCAACCCCGTAG	MS2	20
M561	CAACTCCCCAACCCCGTAGC	MS2	20
M562	AACTCCCCAACCCCGTAGCC	MS2	20
M563	ACTCCCCAACCCCGTAGCCG	MS2	20
M564	CTCCCCAACCCCGTAGCCGA	MS2	20
M565	TCCCCAACCCCGTAGCCGAT	MS2	20
M566	CCCCAACCCCGTAGCCGATT	MS2	20
M567	CCCAACCCCGTAGCCGATTT	MS2	20
M568	CCAACCCCGTAGCCGATTTA	MS2	20
M569	CAACCCCGTAGCCGATTTAA	MS2	20
M570	AACCCCGTAGCCGATTTAAT	MS2	20
M571	ACCCCGTAGCCGATTTAATA	MS2	20
M572	CCCCGTAGCCGATTTAATAT	MS2	20
M573	CCCGTAGCCGATTTAATATC	MS2	20
M574	CCGTAGCCGATTTAATATCA	MS2	20
M575	CGTAGCCGATTTAATATCAG	MS2	20
M576	GTAGCCGATTTAATATCAGC	MS2	20
M577	TAGCCGATTTAATATCAGCA	MS2	20
M578	AGCCGATTTAATATCAGCAT	MS2	20
M579	GCCGATTTAATATCAGCATC	MS2	20
M580	CCGATTTAATATCAGCATCA	MS2	20
M581	CGATTTAATATCAGCATCAG	MS2	20
M582	GATTTAATATCAGCATCAGG	MS2	20
M583	ATTTAATATCAGCATCAGGG	MS2	20
M584	TTTAATATCAGCATCAGGGC	MS2	20
M585	TTAATATCAGCATCAGGGCG	MS2	20
M586	TAATATCAGCATCAGGGCGA	MS2	20
M587	AATATCAGCATCAGGGCGAA	MS2	20
M588	ATATCAGCATCAGGGCGAAG	MS2	20
M589	TATCAGCATCAGGGCGAAGA	MS2	20
M590	ATCAGCATCAGGGCGAAGAG	MS2	20
M591	TCAGCATCAGGGCGAAGAGA	MS2	20
M592	CAGCATCAGGGCGAAGAGAT	MS2	20
M593	AGCATCAGGGCGAAGAGATT	MS2	20
M594	GCATCAGGGCGAAGAGATTG	MS2	20
M595	CATCAGGGCGAAGAGATTGT	MS2	20
M596	ATCAGGGCGAAGAGATTGTC	MS2	20
M597	TCAGGGCGAAGAGATTGTCA	MS2	20
M598	CAGGGCGAAGAGATTGTCAA	MS2	20
M599	AGGGCGAAGAGATTGTCAAC	MS2	20
M600	GGGCGAAGAGATTGTCAACA	MS2	20
M601	GGCGAAGAGATTGTCAACAG	MS2	20
M602	GCGAAGAGATTGTCAACAGG	MS2	20
M603	CGAAGAGATTGTCAACAGGT	MS2	20
M604	GAAGAGATTGTCAACAGGTT	MS2	20
M605	AAGAGATTGTCAACAGGTTT	MS2	20
M606	AGAGATTGTCAACAGGTTTC	MS2	20
M607	GAGATTGTCAACAGGTTTCT	MS2	20
M608	AGATTGTCAACAGGTTTCTT	MS2	20
M609	GATTGTCAACAGGTTTCTTG	MS2	20
M610	ATTGTCAACAGGTTTCTTGA	MS2	20
M611	TTGTCAACAGGTTTCTTGAT	MS2	20
M612	TGTCAACAGGTTTCTTGATG	MS2	20
M613	GTCAACAGGTTTCTTGATGT	MS2	20
M614	TCAACAGGTTTCTTGATGTA	MS2	20
M615	CAACAGGTTTCTTGATGTAA	MS2	20
M616	AACAGGTTTCTTGATGTAAA	MS2	20
M617	ACAGGTTTCTTGATGTAAAA	MS2	20
M618	CAGGTTTCTTGATGTAAAAC	MS2	20
M619	AGGTTTCTTGATGTAAAACG	MS2	20
M620	GGTTTCTTGATGTAAAACGG	MS2	20
M621	GTTTCTTGATGTAAAACGGT	MS2	20
M622	TTTCTTGATGTAAAACGGTT	MS2	20
M623	TTCTTGATGTAAAACGGTTT	MS2	20
M624	TCTTGATGTAAAACGGTTTG	MS2	20
M625	CTTGATGTAAAACGGTTTGA	MS2	20
M626	TTGATGTAAAACGGTTTGAC	MS2	20
M627	TGATGTAAAACGGTTTGACA	MS2	20
M628	GATGTAAAACGGTTTGACAT	MS2	20
M629	ATGTAAAACGGTTTGACATC	MS2	20
M630	TGTAAAACGGTTTGACATCG	MS2	20
M631	GTAAAACGGTTTGACATCGA	MS2	20
M632	TAAAACGGTTTGACATCGAC	MS2	20
M633	AAAACGGTTTGACATCGACA	MS2	20
M634	AAACGGTTTGACATCGACAC	MS2	20
M635	AACGGTTTGACATCGACACC	MS2	20
M636	ACGGTTTGACATCGACACCA	MS2	20
M637	CGGTTTGACATCGACACCAC	MS2	20
M638	GGTTTGACATCGACACCACG	MS2	20
M639	GTTTGACATCGACACCACGG	MS2	20
M640	TTTGACATCGACACCACGGT	MS2	20
M641	TTGACATCGACACCACGGTA	MS2	20
M642	TGACATCGACACCACGGTAA	MS2	20
M643	GACATCGACACCACGGTAAA	MS2	20
M644	ACATCGACACCACGGTAAAA	MS2	20
M645	CATCGACACCACGGTAAAAG	MS2	20
M646	ATCGACACCACGGTAAAAGT	MS2	20
M647	TCGACACCACGGTAAAAGTG	MS2	20
M648	CGACACCACGGTAAAAGTGC	MS2	20
M649	GACACCACGGTAAAAGTGCG	MS2	20
M650	ACACCACGGTAAAAGTGCGC	MS2	20
M651	CACCACGGTAAAAGTGCGCG	MS2	20
M652	ACCACGGTAAAAGTGCGCGC	MS2	20
M653	CCACGGTAAAAGTGCGCGCC	MS2	20
M654	CACGGTAAAAGTGCGCGCCG	MS2	20
M655	ACGGTAAAAGTGCGCGCCGC	MS2	20
M656	CGGTAAAAGTGCGCGCCGCA	MS2	20
M657	GGTAAAAGTGCGCGCCGCAG	MS2	20
M658	GTAAAAGTGCGCGCCGCAGC	MS2	20
M659	TAAAAGTGCGCGCCGCAGCT	MS2	20
M660	AAAAGTGCGCGCCGCAGCTC	MS2	20
M661	AAAGTGCGCGCCGCAGCTCT	MS2	20
M662	AAGTGCGCGCCGCAGCTCTC	MS2	20
M663	AGTGCGCGCCGCAGCTCTCG	MS2	20
M664	GTGCGCGCCGCAGCTCTCGC	MS2	20
M665	TGCGCGCCGCAGCTCTCGCG	MS2	20
M666	GCGCGCCGCAGCTCTCGCGA	MS2	20
M667	CGCGCCGCAGCTCTCGCGAA	MS2	20
M668	GCGCCGCAGCTCTCGCGAAA	MS2	20
M669	CGCCGCAGCTCTCGCGAAAG	MS2	20
M670	GCCGCAGCTCTCGCGAAAGA	MS2	20
M671	CCGCAGCTCTCGCGAAAGAG	MS2	20
M672	CGCAGCTCTCGCGAAAGAGC	MS2	20
M673	GCAGCTCTCGCGAAAGAGCC	MS2	20
M674	CAGCTCTCGCGAAAGAGCCC	MS2	20
M675	AGCTCTCGCGAAAGAGCCCG	MS2	20
M676	GCTCTCGCGAAAGAGCCCGG	MS2	20
M677	CTCTCGCGAAAGAGCCCGGA	MS2	20
M678	TCTCGCGAAAGAGCCCGGAC	MS2	20
M679	CTCGCGAAAGAGCCCGGACA	MS2	20
M680	TCGCGAAAGAGCCCGGACAC	MS2	20
M681	CGCGAAAGAGCCCGGACACG	MS2	20
M682	GCGAAAGAGCCCGGACACGA	MS2	20
M683	CGAAAGAGCCCGGACACGAA	MS2	20
M684	GAAAGAGCCCGGACACGAAC	MS2	20
M685	AAAGAGCCCGGACACGAACG	MS2	20
M686	AAGAGCCCGGACACGAACGT	MS2	20
M687	AGAGCCCGGACACGAACGTT	MS2	20
M688	GAGCCCGGACACGAACGTTT	MS2	20
M689	AGCCCGGACACGAACGTTTT	MS2	20
M690	GCCCGGACACGAACGTTTTA	MS2	20
M691	CCCGGACACGAACGTTTTAC	MS2	20
M692	CCGGACACGAACGTTTTACG	MS2	20
M693	CGGACACGAACGTTTTACGA	MS2	20
M694	GGACACGAACGTTTTACGAA	MS2	20
M695	GACACGAACGTTTTACGAAG	MS2	20
M696	ACACGAACGTTTTACGAAGA	MS2	20
M697	CACGAACGTTTTACGAAGAT	MS2	20
M698	ACGAACGTTTTACGAAGATT	MS2	20
M699	CGAACGTTTTACGAAGATTC	MS2	20
M700	GAACGTTTTACGAAGATTCG	MS2	20
M701	AACGTTTTACGAAGATTCGG	MS2	20
M702	ACGTTTTACGAAGATTCGGT	MS2	20
M703	CGTTTTACGAAGATTCGGTT	MS2	20
M704	GTTTTACGAAGATTCGGTTT	MS2	20
M705	TTTTACGAAGATTCGGTTTA	MS2	20
M706	TTTACGAAGATTCGGTTTAA	MS2	20
M707	TTACGAAGATTCGGTTTAAA	MS2	20
M708	TACGAAGATTCGGTTTAAAA	MS2	20
M709	ACGAAGATTCGGTTTAAAAC	MS2	20
M710	CGAAGATTCGGTTTAAAACC	MS2	20
M711	GAAGATTCGGTTTAAAACCG	MS2	20
M712	AAGATTCGGTTTAAAACCGT	MS2	20
M713	AGATTCGGTTTAAAACCGTA	MS2	20
M714	GATTCGGTTTAAAACCGTAG	MS2	20
M715	ATTCGGTTTAAAACCGTAGT	MS2	20
M716	TTCGGTTTAAAACCGTAGTA	MS2	20
M717	TCGGTTTAAAACCGTAGTAG	MS2	20
M718	CGGTTTAAAACCGTAGTAGG	MS2	20
M719	GGTTTAAAACCGTAGTAGGC	MS2	20
M720	GTTTAAAACCGTAGTAGGCA	MS2	20
M721	TTTAAAACCGTAGTAGGCAA	MS2	20
M722	TTAAAACCGTAGTAGGCAAG	MS2	20
M723	TAAAACCGTAGTAGGCAAGT	MS2	20
M724	AAAACCGTAGTAGGCAAGTG	MS2	20
M725	AAACCGTAGTAGGCAAGTGC	MS2	20
M726	AACCGTAGTAGGCAAGTGCC	MS2	20
M727	ACCGTAGTAGGCAAGTGCCT	MS2	20
M728	CCGTAGTAGGCAAGTGCCTC	MS2	20
M729	CGTAGTAGGCAAGTGCCTCT	MS2	20
M730	GTAGTAGGCAAGTGCCTCTA	MS2	20
M731	TAGTAGGCAAGTGCCTCTAG	MS2	20
M732	AGTAGGCAAGTGCCTCTAGC	MS2	20
M733	GTAGGCAAGTGCCTCTAGCA	MS2	20
M734	TAGGCAAGTGCCTCTAGCAC	MS2	20
M735	AGGCAAGTGCCTCTAGCACA	MS2	20
M736	GGCAAGTGCCTCTAGCACAC	MS2	20
M737	GCAAGTGCCTCTAGCACACG	MS2	20
M738	CAAGTGCCTCTAGCACACGG	MS2	20
M739	AAGTGCCTCTAGCACACGGG	MS2	20
M740	AGTGCCTCTAGCACACGGGG	MS2	20
M741	GTGCCTCTAGCACACGGGGT	MS2	20
M742	TGCCTCTAGCACACGGGGTG	MS2	20
M743	GCCTCTAGCACACGGGGTGC	MS2	20
M744	CCTCTAGCACACGGGGTGCA	MS2	20
M745	CTCTAGCACACGGGGTGCAA	MS2	20
M746	TCTAGCACACGGGGTGCAAT	MS2	20
M747	CTAGCACACGGGGTGCAATC	MS2	20
M748	TAGCACACGGGGTGCAATCT	MS2	20
M749	AGCACACGGGGTGCAATCTC	MS2	20
M750	GCACACGGGGTGCAATCTCA	MS2	20
M751	CACACGGGGTGCAATCTCAC	MS2	20
M752	ACACGGGGTGCAATCTCACT	MS2	20
M753	CACGGGGTGCAATCTCACTG	MS2	20
M754	ACGGGGTGCAATCTCACTGG	MS2	20
M755	CGGGGTGCAATCTCACTGGG	MS2	20
M756	GGGGTGCAATCTCACTGGGA	MS2	20
M757	GGGTGCAATCTCACTGGGAC	MS2	20
M758	GGTGCAATCTCACTGGGACA	MS2	20
M759	GTGCAATCTCACTGGGACAT	MS2	20
M760	TGCAATCTCACTGGGACATA	MS2	20
M761	GCAATCTCACTGGGACATAT	MS2	20
M762	CAATCTCACTGGGACATATA	MS2	20
M763	AATCTCACTGGGACATATAA	MS2	20
M764	ATCTCACTGGGACATATAAT	MS2	20
M765	TCTCACTGGGACATATAATA	MS2	20
M766	CTCACTGGGACATATAATAT	MS2	20
M767	TCACTGGGACATATAATATC	MS2	20
M768	CACTGGGACATATAATATCG	MS2	20
M769	ACTGGGACATATAATATCGT	MS2	20
M770	CTGGGACATATAATATCGTC	MS2	20
M771	TGGGACATATAATATCGTCC	MS2	20
M772	GGGACATATAATATCGTCCC	MS2	20
M773	GGACATATAATATCGTCCCC	MS2	20
M774	GACATATAATATCGTCCCCG	MS2	20
M775	ACATATAATATCGTCCCCGT	MS2	20
M776	CATATAATATCGTCCCCGTA	MS2	20
M777	ATATAATATCGTCCCCGTAG	MS2	20
M778	TATAATATCGTCCCCGTAGA	MS2	20
M779	ATAATATCGTCCCCGTAGAT	MS2	20
M780	TAATATCGTCCCCGTAGATG	MS2	20
M781	AATATCGTCCCCGTAGATGC	MS2	20
M782	ATATCGTCCCCGTAGATGCC	MS2	20
M783	TATCGTCCCCGTAGATGCCT	MS2	20
M784	ATCGTCCCCGTAGATGCCTA	MS2	20
M785	TCGTCCCCGTAGATGCCTAT	MS2	20
M786	CGTCCCCGTAGATGCCTATG	MS2	20
M787	GTCCCCGTAGATGCCTATGG	MS2	20
M788	TCCCCGTAGATGCCTATGGT	MS2	20
M789	CCCCGTAGATGCCTATGGTT	MS2	20
M790	CCCGTAGATGCCTATGGTTC	MS2	20
M791	CCGTAGATGCCTATGGTTCC	MS2	20
M792	CGTAGATGCCTATGGTTCCG	MS2	20
M793	GTAGATGCCTATGGTTCCGG	MS2	20
M794	TAGATGCCTATGGTTCCGGC	MS2	20
M795	AGATGCCTATGGTTCCGGCG	MS2	20
M796	GATGCCTATGGTTCCGGCGT	MS2	20
M797	ATGCCTATGGTTCCGGCGTT	MS2	20
M798	TGCCTATGGTTCCGGCGTTA	MS2	20
M799	GCCTATGGTTCCGGCGTTAC	MS2	20
M800	CCTATGGTTCCGGCGTTACC	MS2	20
M801	CTATGGTTCCGGCGTTACCA	MS2	20
M802	TATGGTTCCGGCGTTACCAA	MS2	20
M803	ATGGTTCCGGCGTTACCAAA	MS2	20
M804	TGGTTCCGGCGTTACCAAAA	MS2	20
M805	GGTTCCGGCGTTACCAAAAT	MS2	20
M806	GTTCCGGCGTTACCAAAATG	MS2	20
M807	TTCCGGCGTTACCAAAATGG	MS2	20
M808	TCCGGCGTTACCAAAATGGA	MS2	20
M809	CCGGCGTTACCAAAATGGAT	MS2	20
M810	CGGCGTTACCAAAATGGATT	MS2	20
M811	GGCGTTACCAAAATGGATTT	MS2	20
M812	GCGTTACCAAAATGGATTTG	MS2	20
M813	CGTTACCAAAATGGATTTGG	MS2	20
M814	GTTACCAAAATGGATTTGGG	MS2	20
M815	TTACCAAAATGGATTTGGGT	MS2	20
M816	TACCAAAATGGATTTGGGTC	MS2	20
M817	ACCAAAATGGATTTGGGTCG	MS2	20
M818	CCAAAATGGATTTGGGTCGC	MS2	20
M819	CAAAATGGATTTGGGTCGCT	MS2	20
M820	AAAATGGATTTGGGTCGCTT	MS2	20
M821	AAATGGATTTGGGTCGCTTT	MS2	20
M822	AATGGATTTGGGTCGCTTTG	MS2	20
M823	ATGGATTTGGGTCGCTTTGA	MS2	20
M824	TGGATTTGGGTCGCTTTGAC	MS2	20
M825	GGATTTGGGTCGCTTTGACT	MS2	20
M826	GATTTGGGTCGCTTTGACTA	MS2	20
M827	ATTTGGGTCGCTTTGACTAT	MS2	20
M828	TTTGGGTCGCTTTGACTATT	MS2	20
M829	TTGGGTCGCTTTGACTATTG	MS2	20
M830	TGGGTCGCTTTGACTATTGC	MS2	20
M831	GGGTCGCTTTGACTATTGCC	MS2	20
M832	GGTCGCTTTGACTATTGCCC	MS2	20
M833	GTCGCTTTGACTATTGCCCA	MS2	20
M834	TCGCTTTGACTATTGCCCAG	MS2	20
M835	CGCTTTGACTATTGCCCAGA	MS2	20
M836	GCTTTGACTATTGCCCAGAA	MS2	20
M837	CTTTGACTATTGCCCAGAAT	MS2	20
M838	TTTGACTATTGCCCAGAATA	MS2	20
M839	TTGACTATTGCCCAGAATAT	MS2	20
M840	TGACTATTGCCCAGAATATC	MS2	20
M841	GACTATTGCCCAGAATATCA	MS2	20
M842	ACTATTGCCCAGAATATCAT	MS2	20
M843	CTATTGCCCAGAATATCATG	MS2	20
M844	TATTGCCCAGAATATCATGG	MS2	20
M845	ATTGCCCAGAATATCATGGA	MS2	20
M846	TTGCCCAGAATATCATGGAC	MS2	20
M847	TGCCCAGAATATCATGGACT	MS2	20
M848	GCCCAGAATATCATGGACTC	MS2	20
M849	CCCAGAATATCATGGACTCT	MS2	20
M850	CCAGAATATCATGGACTCTA	MS2	20
M851	CAGAATATCATGGACTCTAG	MS2	20
M852	AGAATATCATGGACTCTAGC	MS2	20
M853	GAATATCATGGACTCTAGCT	MS2	20
M854	AATATCATGGACTCTAGCTC	MS2	20
M855	ATATCATGGACTCTAGCTCA	MS2	20
M856	TATCATGGACTCTAGCTCAA	MS2	20
M857	ATCATGGACTCTAGCTCAAA	MS2	20
M858	TCATGGACTCTAGCTCAAAT	MS2	20
M859	CATGGACTCTAGCTCAAATG	MS2	20
M860	ATGGACTCTAGCTCAAATGT	MS2	20
M861	TGGACTCTAGCTCAAATGTG	MS2	20
M862	GGACTCTAGCTCAAATGTGA	MS2	20
M863	GACTCTAGCTCAAATGTGAA	MS2	20
M864	ACTCTAGCTCAAATGTGAAC	MS2	20
M865	CTCTAGCTCAAATGTGAACC	MS2	20
M866	TCTAGCTCAAATGTGAACCC	MS2	20
M867	CTAGCTCAAATGTGAACCCA	MS2	20
M868	TAGCTCAAATGTGAACCCAT	MS2	20
M869	AGCTCAAATGTGAACCCATT	MS2	20
M870	GCTCAAATGTGAACCCATTT	MS2	20
M871	CTCAAATGTGAACCCATTTC	MS2	20
M872	TCAAATGTGAACCCATTTCC	MS2	20
M873	CAAATGTGAACCCATTTCCC	MS2	20
M874	AAATGTGAACCCATTTCCCA	MS2	20
M875	AATGTGAACCCATTTCCCAT	MS2	20
M876	ATGTGAACCCATTTCCCATT	MS2	20
M877	TGTGAACCCATTTCCCATTG	MS2	20
M878	GTGAACCCATTTCCCATTGT	MS2	20
M879	TGAACCCATTTCCCATTGTG	MS2	20
M880	GAACCCATTTCCCATTGTGG	MS2	20
M881	AACCCATTTCCCATTGTGGA	MS2	20
M882	ACCCATTTCCCATTGTGGAA	MS2	20
M883	CCCATTTCCCATTGTGGAAA	MS2	20
M884	CCATTTCCCATTGTGGAAAA	MS2	20
M885	CATTTCCCATTGTGGAAAAT	MS2	20
M886	ATTTCCCATTGTGGAAAATA	MS2	20
M887	TTTCCCATTGTGGAAAATAG	MS2	20
M888	TTCCCATTGTGGAAAATAGT	MS2	20
M889	TCCCATTGTGGAAAATAGTT	MS2	20
M890	CCCATTGTGGAAAATAGTTC	MS2	20
M891	CCATTGTGGAAAATAGTTCC	MS2	20
M892	CATTGTGGAAAATAGTTCCC	MS2	20
M893	ATTGTGGAAAATAGTTCCCA	MS2	20
M894	TTGTGGAAAATAGTTCCCAT	MS2	20
M895	TGTGGAAAATAGTTCCCATC	MS2	20
M896	GTGGAAAATAGTTCCCATCG	MS2	20
M897	TGGAAAATAGTTCCCATCGT	MS2	20
M898	GGAAAATAGTTCCCATCGTA	MS2	20
M899	GAAAATAGTTCCCATCGTAT	MS2	20
M900	AAAATAGTTCCCATCGTATC	MS2	20
M901	AAATAGTTCCCATCGTATCG	MS2	20
M902	AATAGTTCCCATCGTATCGT	MS2	20
M903	ATAGTTCCCATCGTATCGTC	MS2	20
M904	TAGTTCCCATCGTATCGTCT	MS2	20
M905	AGTTCCCATCGTATCGTCTC	MS2	20
M906	GTTCCCATCGTATCGTCTCG	MS2	20
M907	TTCCCATCGTATCGTCTCGC	MS2	20
M908	TCCCATCGTATCGTCTCGCC	MS2	20
M909	CCCATCGTATCGTCTCGCCA	MS2	20
M910	CCATCGTATCGTCTCGCCAT	MS2	20
M911	CATCGTATCGTCTCGCCATC	MS2	20
M912	ATCGTATCGTCTCGCCATCT	MS2	20
M913	TCGTATCGTCTCGCCATCTA	MS2	20
M914	CGTATCGTCTCGCCATCTAC	MS2	20
M915	GTATCGTCTCGCCATCTACG	MS2	20
M916	TATCGTCTCGCCATCTACGA	MS2	20
M917	ATCGTCTCGCCATCTACGAT	MS2	20
M918	TCGTCTCGCCATCTACGATT	MS2	20
M919	CGTCTCGCCATCTACGATTC	MS2	20
M920	GTCTCGCCATCTACGATTCC	MS2	20
M921	TCTCGCCATCTACGATTCCG	MS2	20
M922	CTCGCCATCTACGATTCCGT	MS2	20
M923	TCGCCATCTACGATTCCGTA	MS2	20
M924	CGCCATCTACGATTCCGTAG	MS2	20
M925	GCCATCTACGATTCCGTAGT	MS2	20
M926	CCATCTACGATTCCGTAGTG	MS2	20
M927	CATCTACGATTCCGTAGTGT	MS2	20
M928	ATCTACGATTCCGTAGTGTG	MS2	20
M929	TCTACGATTCCGTAGTGTGA	MS2	20
M930	CTACGATTCCGTAGTGTGAG	MS2	20
M931	TACGATTCCGTAGTGTGAGC	MS2	20
M932	ACGATTCCGTAGTGTGAGCG	MS2	20
M933	CGATTCCGTAGTGTGAGCGG	MS2	20
M934	GATTCCGTAGTGTGAGCGGA	MS2	20
M935	ATTCCGTAGTGTGAGCGGAT	MS2	20
M936	TTCCGTAGTGTGAGCGGATA	MS2	20
M937	TCCGTAGTGTGAGCGGATAC	MS2	20
M938	CCGTAGTGTGAGCGGATACG	MS2	20
M939	CGTAGTGTGAGCGGATACGA	MS2	20
M940	GTAGTGTGAGCGGATACGAT	MS2	20
M941	TAGTGTGAGCGGATACGATC	MS2	20
M942	AGTGTGAGCGGATACGATCG	MS2	20
M943	GTGTGAGCGGATACGATCGA	MS2	20
M944	TGTGAGCGGATACGATCGAG	MS2	20
M945	GTGAGCGGATACGATCGAGA	MS2	20
M946	TGAGCGGATACGATCGAGAT	MS2	20
M947	GAGCGGATACGATCGAGATA	MS2	20
M948	AGCGGATACGATCGAGATAT	MS2	20
M949	GCGGATACGATCGAGATATG	MS2	20
M950	CGGATACGATCGAGATATGA	MS2	20
M951	GGATACGATCGAGATATGAA	MS2	20
M952	GATACGATCGAGATATGAAT	MS2	20
M953	ATACGATCGAGATATGAATA	MS2	20
M954	TACGATCGAGATATGAATAT	MS2	20
M955	ACGATCGAGATATGAATATA	MS2	20
M956	CGATCGAGATATGAATATAG	MS2	20
M957	GATCGAGATATGAATATAGC	MS2	20
M958	ATCGAGATATGAATATAGCT	MS2	20
M959	TCGAGATATGAATATAGCTC	MS2	20
M960	CGAGATATGAATATAGCTCT	MS2	20
M961	GAGATATGAATATAGCTCTG	MS2	20
M962	AGATATGAATATAGCTCTGG	MS2	20
M963	GATATGAATATAGCTCTGGT	MS2	20
M964	ATATGAATATAGCTCTGGTG	MS2	20
M965	TATGAATATAGCTCTGGTGG	MS2	20
M966	ATGAATATAGCTCTGGTGGG	MS2	20
M967	TGAATATAGCTCTGGTGGGA	MS2	20
M968	GAATATAGCTCTGGTGGGAG	MS2	20
M969	AATATAGCTCTGGTGGGAGA	MS2	20
M970	ATATAGCTCTGGTGGGAGAA	MS2	20
M971	TATAGCTCTGGTGGGAGAAA	MS2	20
M972	ATAGCTCTGGTGGGAGAAAA	MS2	20
M973	TAGCTCTGGTGGGAGAAAAC	MS2	20
M974	AGCTCTGGTGGGAGAAAACT	MS2	20
M975	GCTCTGGTGGGAGAAAACTC	MS2	20
M976	CTCTGGTGGGAGAAAACTCC	MS2	20
M977	TCTGGTGGGAGAAAACTCCA	MS2	20
M978	CTGGTGGGAGAAAACTCCAC	MS2	20
M979	TGGTGGGAGAAAACTCCACA	MS2	20
M980	GGTGGGAGAAAACTCCACAC	MS2	20
M981	GTGGGAGAAAACTCCACACC	MS2	20
M982	TGGGAGAAAACTCCACACCA	MS2	20
M983	GGGAGAAAACTCCACACCAG	MS2	20
M984	GGAGAAAACTCCACACCAGG	MS2	20
M985	GAGAAAACTCCACACCAGGC	MS2	20
M986	AGAAAACTCCACACCAGGCG	MS2	20
M987	GAAAACTCCACACCAGGCGA	MS2	20
M988	AAAACTCCACACCAGGCGAT	MS2	20
M989	AAACTCCACACCAGGCGATC	MS2	20
M990	AACTCCACACCAGGCGATCG	MS2	20
M991	ACTCCACACCAGGCGATCGG	MS2	20
M992	CTCCACACCAGGCGATCGGA	MS2	20
M993	TCCACACCAGGCGATCGGAG	MS2	20
M994	CCACACCAGGCGATCGGAGA	MS2	20
M995	CACACCAGGCGATCGGAGAT	MS2	20
M996	ACACCAGGCGATCGGAGATG	MS2	20
M997	CACCAGGCGATCGGAGATGG	MS2	20
M998	ACCAGGCGATCGGAGATGGA	MS2	20
M999	CCAGGCGATCGGAGATGGAA	MS2	20
M1000	CAGGCGATCGGAGATGGAAT	MS2	20
M1001	AGGCGATCGGAGATGGAATC	MS2	20
M1002	GGCGATCGGAGATGGAATCG	MS2	20
M1003	GCGATCGGAGATGGAATCGG	MS2	20
M1004	CGATCGGAGATGGAATCGGA	MS2	20
M1005	GATCGGAGATGGAATCGGAT	MS2	20
M1006	ATCGGAGATGGAATCGGATG	MS2	20
M1007	TCGGAGATGGAATCGGATGC	MS2	20
M1008	CGGAGATGGAATCGGATGCA	MS2	20
M1009	GGAGATGGAATCGGATGCAG	MS2	20
M1010	GAGATGGAATCGGATGCAGA	MS2	20
M1011	AGATGGAATCGGATGCAGAC	MS2	20
M1012	GATGGAATCGGATGCAGACG	MS2	20
M1013	ATGGAATCGGATGCAGACGA	MS2	20
M1014	TGGAATCGGATGCAGACGAT	MS2	20
M1015	GGAATCGGATGCAGACGATA	MS2	20
M1016	GAATCGGATGCAGACGATAA	MS2	20
M1017	AATCGGATGCAGACGATAAG	MS2	20
M1018	ATCGGATGCAGACGATAAGT	MS2	20
M1019	TCGGATGCAGACGATAAGTC	MS2	20
M1020	CGGATGCAGACGATAAGTCT	MS2	20
M1021	GGATGCAGACGATAAGTCTA	MS2	20
M1022	GATGCAGACGATAAGTCTAT	MS2	20
M1023	ATGCAGACGATAAGTCTATC	MS2	20
M1024	TGCAGACGATAAGTCTATCG	MS2	20
M1025	GCAGACGATAAGTCTATCGT	MS2	20
M1026	CAGACGATAAGTCTATCGTC	MS2	20
M1027	AGACGATAAGTCTATCGTCG	MS2	20
M1028	GACGATAAGTCTATCGTCGC	MS2	20
M1029	ACGATAAGTCTATCGTCGCA	MS2	20
M1030	CGATAAGTCTATCGTCGCAA	MS2	20
M1031	GATAAGTCTATCGTCGCAAG	MS2	20
M1032	ATAAGTCTATCGTCGCAAGC	MS2	20
M1033	TAAGTCTATCGTCGCAAGCG	MS2	20
M1034	AAGTCTATCGTCGCAAGCGA	MS2	20
M1035	AGTCTATCGTCGCAAGCGAA	MS2	20
M1036	GTCTATCGTCGCAAGCGAAC	MS2	20
M1037	TCTATCGTCGCAAGCGAACC	MS2	20
M1038	CTATCGTCGCAAGCGAACCA	MS2	20
M1039	TATCGTCGCAAGCGAACCAT	MS2	20
M1040	ATCGTCGCAAGCGAACCATC	MS2	20
M1041	TCGTCGCAAGCGAACCATCT	MS2	20
M1042	CGTCGCAAGCGAACCATCTA	MS2	20
M1043	GTCGCAAGCGAACCATCTAC	MS2	20
M1044	TCGCAAGCGAACCATCTACG	MS2	20
M1045	CGCAAGCGAACCATCTACGC	MS2	20
M1046	GCAAGCGAACCATCTACGCT	MS2	20
M1047	CAAGCGAACCATCTACGCTG	MS2	20
M1048	AAGCGAACCATCTACGCTGC	MS2	20
M1049	AGCGAACCATCTACGCTGCC	MS2	20
M1050	GCGAACCATCTACGCTGCCC	MS2	20
M1051	CGAACCATCTACGCTGCCCT	MS2	20
M1052	GAACCATCTACGCTGCCCTG	MS2	20
M1053	AACCATCTACGCTGCCCTGC	MS2	20
M1054	ACCATCTACGCTGCCCTGCT	MS2	20
M1055	CCATCTACGCTGCCCTGCTG	MS2	20
M1056	CATCTACGCTGCCCTGCTGA	MS2	20
M1057	ATCTACGCTGCCCTGCTGAG	MS2	20
M1058	TCTACGCTGCCCTGCTGAGC	MS2	20
M1059	CTACGCTGCCCTGCTGAGCC	MS2	20
M1060	TACGCTGCCCTGCTGAGCCA	MS2	20
M1061	ACGCTGCCCTGCTGAGCCAG	MS2	20
M1062	CGCTGCCCTGCTGAGCCAGA	MS2	20
M1063	GCTGCCCTGCTGAGCCAGAC	MS2	20
M1064	CTGCCCTGCTGAGCCAGACG	MS2	20
M1065	TGCCCTGCTGAGCCAGACGC	MS2	20
M1066	GCCCTGCTGAGCCAGACGCT	MS2	20
M1067	CCCTGCTGAGCCAGACGCTG	MS2	20
M1068	CCTGCTGAGCCAGACGCTGG	MS2	20
M1069	CTGCTGAGCCAGACGCTGGT	MS2	20
M1070	TGCTGAGCCAGACGCTGGTT	MS2	20
M1071	GCTGAGCCAGACGCTGGTTG	MS2	20
M1072	CTGAGCCAGACGCTGGTTGA	MS2	20
M1073	TGAGCCAGACGCTGGTTGAT	MS2	20
M1074	GAGCCAGACGCTGGTTGATC	MS2	20
M1075	AGCCAGACGCTGGTTGATCG	MS2	20
M1076	GCCAGACGCTGGTTGATCGA	MS2	20
M1077	CCAGACGCTGGTTGATCGAT	MS2	20
M1078	CAGACGCTGGTTGATCGATT	MS2	20
M1079	AGACGCTGGTTGATCGATTG	MS2	20
M1080	GACGCTGGTTGATCGATTGA	MS2	20
M1081	ACGCTGGTTGATCGATTGAT	MS2	20
M1082	CGCTGGTTGATCGATTGATC	MS2	20
M1083	GCTGGTTGATCGATTGATCA	MS2	20
M1084	CTGGTTGATCGATTGATCAT	MS2	20
M1085	TGGTTGATCGATTGATCATT	MS2	20
M1086	GGTTGATCGATTGATCATTC	MS2	20
M1087	GTTGATCGATTGATCATTCA	MS2	20
M1088	TTGATCGATTGATCATTCAG	MS2	20
M1089	TGATCGATTGATCATTCAGG	MS2	20
M1090	GATCGATTGATCATTCAGGT	MS2	20
M1091	ATCGATTGATCATTCAGGTC	MS2	20
M1092	TCGATTGATCATTCAGGTCT	MS2	20
M1093	CGATTGATCATTCAGGTCTA	MS2	20
M1094	GATTGATCATTCAGGTCTAT	MS2	20
M1095	ATTGATCATTCAGGTCTATA	MS2	20
M1096	TTGATCATTCAGGTCTATAC	MS2	20
M1097	TGATCATTCAGGTCTATACC	MS2	20
M1098	GATCATTCAGGTCTATACCA	MS2	20
M1099	ATCATTCAGGTCTATACCAA	MS2	20
M1100	TCATTCAGGTCTATACCAAC	MS2	20
M1101	CATTCAGGTCTATACCAACG	MS2	20
M1102	ATTCAGGTCTATACCAACGG	MS2	20
M1103	TTCAGGTCTATACCAACGGA	MS2	20
M1104	TCAGGTCTATACCAACGGAT	MS2	20
M1105	CAGGTCTATACCAACGGATT	MS2	20
M1106	AGGTCTATACCAACGGATTT	MS2	20
M1107	GGTCTATACCAACGGATTTG	MS2	20
M1108	GTCTATACCAACGGATTTGA	MS2	20
M1109	TCTATACCAACGGATTTGAG	MS2	20
M1110	CTATACCAACGGATTTGAGC	MS2	20
M1111	TATACCAACGGATTTGAGCC	MS2	20
M1112	ATACCAACGGATTTGAGCCG	MS2	20
M1113	TACCAACGGATTTGAGCCGG	MS2	20
M1114	ACCAACGGATTTGAGCCGGC	MS2	20
M1115	CCAACGGATTTGAGCCGGCG	MS2	20
M1116	CAACGGATTTGAGCCGGCGT	MS2	20
M1117	AACGGATTTGAGCCGGCGTC	MS2	20
M1118	ACGGATTTGAGCCGGCGTCT	MS2	20
M1119	CGGATTTGAGCCGGCGTCTG	MS2	20
M1120	GGATTTGAGCCGGCGTCTGA	MS2	20
M1121	GATTTGAGCCGGCGTCTGAT	MS2	20
M1122	ATTTGAGCCGGCGTCTGATG	MS2	20
M1123	TTTGAGCCGGCGTCTGATGA	MS2	20
M1124	TTGAGCCGGCGTCTGATGAA	MS2	20
M1125	TGAGCCGGCGTCTGATGAAA	MS2	20
M1126	GAGCCGGCGTCTGATGAAAG	MS2	20
M1127	AGCCGGCGTCTGATGAAAGC	MS2	20
M1128	GCCGGCGTCTGATGAAAGCA	MS2	20
M1129	CCGGCGTCTGATGAAAGCAC	MS2	20
M1130	CGGCGTCTGATGAAAGCACC	MS2	20
M1131	GGCGTCTGATGAAAGCACCG	MS2	20
M1132	GCGTCTGATGAAAGCACCGA	MS2	20
M1133	CGTCTGATGAAAGCACCGAC	MS2	20
M1134	GTCTGATGAAAGCACCGACC	MS2	20
M1135	TCTGATGAAAGCACCGACCC	MS2	20
M1136	CTGATGAAAGCACCGACCCC	MS2	20
M1137	TGATGAAAGCACCGACCCCT	MS2	20
M1138	GATGAAAGCACCGACCCCTT	MS2	20
M1139	ATGAAAGCACCGACCCCTTT	MS2	20
M1140	TGAAAGCACCGACCCCTTTC	MS2	20
M1141	GAAAGCACCGACCCCTTTCT	MS2	20
M1142	AAAGCACCGACCCCTTTCTG	MS2	20
M1143	AAGCACCGACCCCTTTCTGG	MS2	20
M1144	AGCACCGACCCCTTTCTGGA	MS2	20
M1145	GCACCGACCCCTTTCTGGAG	MS2	20
M1146	CACCGACCCCTTTCTGGAGG	MS2	20
M1147	ACCGACCCCTTTCTGGAGGT	MS2	20
M1148	CCGACCCCTTTCTGGAGGTA	MS2	20
M1149	CGACCCCTTTCTGGAGGTAC	MS2	20
M1150	GACCCCTTTCTGGAGGTACA	MS2	20
M1151	ACCCCTTTCTGGAGGTACAT	MS2	20
M1152	CCCCTTTCTGGAGGTACATA	MS2	20
M1153	CCCTTTCTGGAGGTACATAT	MS2	20
M1154	CCTTTCTGGAGGTACATATT	MS2	20
M1155	CTTTCTGGAGGTACATATTC	MS2	20
M1156	TTTCTGGAGGTACATATTCA	MS2	20
M1157	TTCTGGAGGTACATATTCAT	MS2	20
M1158	TCTGGAGGTACATATTCATA	MS2	20
M1159	CTGGAGGTACATATTCATAT	MS2	20
M1160	TGGAGGTACATATTCATATC	MS2	20
M1161	GGAGGTACATATTCATATCA	MS2	20
M1162	GAGGTACATATTCATATCAG	MS2	20
M1163	AGGTACATATTCATATCAGG	MS2	20
M1164	GGTACATATTCATATCAGGC	MS2	20
M1165	GTACATATTCATATCAGGCT	MS2	20
M1166	TACATATTCATATCAGGCTC	MS2	20
M1167	ACATATTCATATCAGGCTCC	MS2	20
M1168	CATATTCATATCAGGCTCCT	MS2	20
M1169	ATATTCATATCAGGCTCCTT	MS2	20
M1170	TATTCATATCAGGCTCCTTA	MS2	20
M1171	ATTCATATCAGGCTCCTTAC	MS2	20
M1172	TTCATATCAGGCTCCTTACA	MS2	20
M1173	TCATATCAGGCTCCTTACAG	MS2	20
M1174	CATATCAGGCTCCTTACAGG	MS2	20
M1175	ATATCAGGCTCCTTACAGGC	MS2	20
M1176	TATCAGGCTCCTTACAGGCA	MS2	20
M1177	ATCAGGCTCCTTACAGGCAG	MS2	20
M1178	TCAGGCTCCTTACAGGCAGC	MS2	20
M1179	CAGGCTCCTTACAGGCAGCC	MS2	20
M1180	AGGCTCCTTACAGGCAGCCC	MS2	20
M1181	GGCTCCTTACAGGCAGCCCG	MS2	20
M1182	GCTCCTTACAGGCAGCCCGA	MS2	20
M1183	CTCCTTACAGGCAGCCCGAT	MS2	20
M1184	TCCTTACAGGCAGCCCGATC	MS2	20
M1185	CCTTACAGGCAGCCCGATCT	MS2	20
M1186	CTTACAGGCAGCCCGATCTA	MS2	20
M1187	TTACAGGCAGCCCGATCTAT	MS2	20
M1188	TACAGGCAGCCCGATCTATT	MS2	20
M1189	ACAGGCAGCCCGATCTATTT	MS2	20
M1190	CAGGCAGCCCGATCTATTTT	MS2	20
M1191	AGGCAGCCCGATCTATTTTA	MS2	20
M1192	GGCAGCCCGATCTATTTTAT	MS2	20
M1193	GCAGCCCGATCTATTTTATT	MS2	20
M1194	CAGCCCGATCTATTTTATTA	MS2	20
M1195	AGCCCGATCTATTTTATTAT	MS2	20
M1196	GCCCGATCTATTTTATTATT	MS2	20
M1197	CCCGATCTATTTTATTATTC	MS2	20
M1198	CCGATCTATTTTATTATTCT	MS2	20
M1199	CGATCTATTTTATTATTCTT	MS2	20
M1200	GATCTATTTTATTATTCTTC	MS2	20
M1201	ATCTATTTTATTATTCTTCG	MS2	20
M1202	TCTATTTTATTATTCTTCGG	MS2	20
M1203	CTATTTTATTATTCTTCGGA	MS2	20
M1204	TATTTTATTATTCTTCGGAA	MS2	20
M1205	ATTTTATTATTCTTCGGAAC	MS2	20
M1206	TTTTATTATTCTTCGGAACT	MS2	20
M1207	TTTATTATTCTTCGGAACTG	MS2	20
M1208	TTATTATTCTTCGGAACTGT	MS2	20
M1209	TATTATTCTTCGGAACTGTA	MS2	20
M1210	ATTATTCTTCGGAACTGTAA	MS2	20
M1211	TTATTCTTCGGAACTGTAAA	MS2	20
M1212	TATTCTTCGGAACTGTAAAC	MS2	20
M1213	ATTCTTCGGAACTGTAAACA	MS2	20
M1214	TTCTTCGGAACTGTAAACAC	MS2	20
M1215	TCTTCGGAACTGTAAACACT	MS2	20
M1216	CTTCGGAACTGTAAACACTC	MS2	20
M1217	TTCGGAACTGTAAACACTCC	MS2	20
M1218	TCGGAACTGTAAACACTCCG	MS2	20
M1219	CGGAACTGTAAACACTCCGT	MS2	20
M1220	GGAACTGTAAACACTCCGTT	MS2	20
M1221	GAACTGTAAACACTCCGTTC	MS2	20
M1222	AACTGTAAACACTCCGTTCC	MS2	20
M1223	ACTGTAAACACTCCGTTCCC	MS2	20
M1224	CTGTAAACACTCCGTTCCCT	MS2	20
M1225	TGTAAACACTCCGTTCCCTA	MS2	20
M1226	GTAAACACTCCGTTCCCTAC	MS2	20
M1227	TAAACACTCCGTTCCCTACA	MS2	20
M1228	AAACACTCCGTTCCCTACAA	MS2	20
M1229	AACACTCCGTTCCCTACAAC	MS2	20
M1230	ACACTCCGTTCCCTACAACG	MS2	20
M1231	CACTCCGTTCCCTACAACGA	MS2	20
M1232	ACTCCGTTCCCTACAACGAG	MS2	20
M1233	CTCCGTTCCCTACAACGAGC	MS2	20
M1234	TCCGTTCCCTACAACGAGCC	MS2	20
M1235	CCGTTCCCTACAACGAGCCT	MS2	20
M1236	CGTTCCCTACAACGAGCCTA	MS2	20
M1237	GTTCCCTACAACGAGCCTAA	MS2	20
M1238	TTCCCTACAACGAGCCTAAA	MS2	20
M1239	TCCCTACAACGAGCCTAAAT	MS2	20
M1240	CCCTACAACGAGCCTAAATT	MS2	20
M1241	CCTACAACGAGCCTAAATTC	MS2	20
M1242	CTACAACGAGCCTAAATTCA	MS2	20
M1243	TACAACGAGCCTAAATTCAT	MS2	20
M1244	ACAACGAGCCTAAATTCATA	MS2	20
M1245	CAACGAGCCTAAATTCATAT	MS2	20
M1246	AACGAGCCTAAATTCATATG	MS2	20
M1247	ACGAGCCTAAATTCATATGA	MS2	20
M1248	CGAGCCTAAATTCATATGAC	MS2	20
M1249	GAGCCTAAATTCATATGACT	MS2	20
M1250	AGCCTAAATTCATATGACTC	MS2	20
M1251	GCCTAAATTCATATGACTCG	MS2	20
M1252	CCTAAATTCATATGACTCGT	MS2	20
M1253	CTAAATTCATATGACTCGTT	MS2	20
M1254	TAAATTCATATGACTCGTTA	MS2	20
M1255	AAATTCATATGACTCGTTAT	MS2	20
M1256	AATTCATATGACTCGTTATA	MS2	20
M1257	ATTCATATGACTCGTTATAG	MS2	20
M1258	TTCATATGACTCGTTATAGC	MS2	20
M1259	TCATATGACTCGTTATAGCG	MS2	20
M1260	CATATGACTCGTTATAGCGG	MS2	20
M1261	ATATGACTCGTTATAGCGGA	MS2	20
M1262	TATGACTCGTTATAGCGGAC	MS2	20
M1263	ATGACTCGTTATAGCGGACC	MS2	20
M1264	TGACTCGTTATAGCGGACCG	MS2	20
M1265	GACTCGTTATAGCGGACCGC	MS2	20
M1266	ACTCGTTATAGCGGACCGCG	MS2	20
M1267	CTCGTTATAGCGGACCGCGT	MS2	20
M1268	TCGTTATAGCGGACCGCGTG	MS2	20
M1269	CGTTATAGCGGACCGCGTGT	MS2	20
M1270	GTTATAGCGGACCGCGTGTC	MS2	20
M1271	TTATAGCGGACCGCGTGTCT	MS2	20
M1272	TATAGCGGACCGCGTGTCTG	MS2	20
M1273	ATAGCGGACCGCGTGTCTGA	MS2	20
M1274	TAGCGGACCGCGTGTCTGAT	MS2	20
M1275	AGCGGACCGCGTGTCTGATC	MS2	20
M1276	GCGGACCGCGTGTCTGATCC	MS2	20
M1277	CGGACCGCGTGTCTGATCCA	MS2	20
M1278	GGACCGCGTGTCTGATCCAC	MS2	20
M1279	GACCGCGTGTCTGATCCACG	MS2	20
M1280	ACCGCGTGTCTGATCCACGG	MS2	20
M1281	CCGCGTGTCTGATCCACGGC	MS2	20
M1282	CGCGTGTCTGATCCACGGCG	MS2	20
M1283	GCGTGTCTGATCCACGGCGC	MS2	20
M1284	CGTGTCTGATCCACGGCGCA	MS2	20
M1285	GTGTCTGATCCACGGCGCAC	MS2	20
M1286	TGTCTGATCCACGGCGCACA	MS2	20
M1287	GTCTGATCCACGGCGCACAT	MS2	20
M1288	TCTGATCCACGGCGCACATT	MS2	20
M1289	CTGATCCACGGCGCACATTG	MS2	20
M1290	TGATCCACGGCGCACATTGG	MS2	20
M1291	GATCCACGGCGCACATTGGT	MS2	20
M1292	ATCCACGGCGCACATTGGTC	MS2	20
M1293	TCCACGGCGCACATTGGTCT	MS2	20
M1294	CCACGGCGCACATTGGTCTC	MS2	20
M1295	CACGGCGCACATTGGTCTCG	MS2	20
M1296	ACGGCGCACATTGGTCTCGG	MS2	20
M1297	CGGCGCACATTGGTCTCGGA	MS2	20
M1298	GGCGCACATTGGTCTCGGAC	MS2	20
M1299	GCGCACATTGGTCTCGGACC	MS2	20
M1300	CGCACATTGGTCTCGGACCA	MS2	20
M1301	GCACATTGGTCTCGGACCAA	MS2	20
M1302	CACATTGGTCTCGGACCAAT	MS2	20
M1303	ACATTGGTCTCGGACCAATA	MS2	20
M1304	CATTGGTCTCGGACCAATAG	MS2	20
M1305	ATTGGTCTCGGACCAATAGA	MS2	20
M1306	TTGGTCTCGGACCAATAGAG	MS2	20
M1307	TGGTCTCGGACCAATAGAGC	MS2	20
M1308	GGTCTCGGACCAATAGAGCC	MS2	20
M1309	GTCTCGGACCAATAGAGCCG	MS2	20
M1310	TCTCGGACCAATAGAGCCGC	MS2	20
M1311	CTCGGACCAATAGAGCCGCT	MS2	20
M1312	TCGGACCAATAGAGCCGCTC	MS2	20
M1313	CGGACCAATAGAGCCGCTCT	MS2	20
M1314	GGACCAATAGAGCCGCTCTC	MS2	20
M1315	GACCAATAGAGCCGCTCTCA	MS2	20
M1316	ACCAATAGAGCCGCTCTCAG	MS2	20
M1317	CCAATAGAGCCGCTCTCAGA	MS2	20
M1318	CAATAGAGCCGCTCTCAGAG	MS2	20
M1319	AATAGAGCCGCTCTCAGAGC	MS2	20
M1320	ATAGAGCCGCTCTCAGAGCG	MS2	20
M1321	TAGAGCCGCTCTCAGAGCGC	MS2	20
M1322	AGAGCCGCTCTCAGAGCGCG	MS2	20
M1323	GAGCCGCTCTCAGAGCGCGG	MS2	20
M1324	AGCCGCTCTCAGAGCGCGGG	MS2	20
M1325	GCCGCTCTCAGAGCGCGGGG	MS2	20
M1326	CCGCTCTCAGAGCGCGGGGG	MS2	20
M1327	CGCTCTCAGAGCGCGGGGGG	MS2	20
M1328	GCTCTCAGAGCGCGGGGGGT	MS2	20
M1329	CTCTCAGAGCGCGGGGGGTA	MS2	20
M1330	TCTCAGAGCGCGGGGGGTAA	MS2	20
M1331	CTCAGAGCGCGGGGGGTAAC	MS2	20
M1332	TCAGAGCGCGGGGGGTAACG	MS2	20
M1333	CAGAGCGCGGGGGGTAACGG	MS2	20
M1334	AGAGCGCGGGGGGTAACGGT	MS2	20
M1335	GAGCGCGGGGGGTAACGGTT	MS2	20
M1336	AGCGCGGGGGGTAACGGTTG	MS2	20
M1337	GCGCGGGGGGTAACGGTTGC	MS2	20
M1338	CGCGGGGGGTAACGGTTGCT	MS2	20
M1339	GCGGGGGGTAACGGTTGCTT	MS2	20
M1340	CGGGGGGTAACGGTTGCTTG	MS2	20
M1341	GGGGGGTAACGGTTGCTTGT	MS2	20
M1342	GGGGGTAACGGTTGCTTGTT	MS2	20
M1343	GGGGTAACGGTTGCTTGTTC	MS2	20
M1344	GGGTAACGGTTGCTTGTTCA	MS2	20
M1345	GGTAACGGTTGCTTGTTCAG	MS2	20
M1346	GTAACGGTTGCTTGTTCAGC	MS2	20
M1347	TAACGGTTGCTTGTTCAGCG	MS2	20
M1348	AACGGTTGCTTGTTCAGCGA	MS2	20
M1349	ACGGTTGCTTGTTCAGCGAA	MS2	20
M1350	CGGTTGCTTGTTCAGCGAAC	MS2	20
M1351	GGTTGCTTGTTCAGCGAACT	MS2	20
M1352	GTTGCTTGTTCAGCGAACTT	MS2	20
M1353	TTGCTTGTTCAGCGAACTTC	MS2	20
M1354	TGCTTGTTCAGCGAACTTCT	MS2	20
M1355	GCTTGTTCAGCGAACTTCTT	MS2	20
M1356	CTTGTTCAGCGAACTTCTTG	MS2	20
M1357	TTGTTCAGCGAACTTCTTGT	MS2	20
M1358	TGTTCAGCGAACTTCTTGTA	MS2	20
M1359	GTTCAGCGAACTTCTTGTAA	MS2	20
M1360	TTCAGCGAACTTCTTGTAAG	MS2	20
M1361	TCAGCGAACTTCTTGTAAGG	MS2	20
M1362	CAGCGAACTTCTTGTAAGGC	MS2	20
M1363	AGCGAACTTCTTGTAAGGCG	MS2	20
M1364	GCGAACTTCTTGTAAGGCGC	MS2	20
M1365	CGAACTTCTTGTAAGGCGCT	MS2	20
M1366	GAACTTCTTGTAAGGCGCTG	MS2	20
M1367	AACTTCTTGTAAGGCGCTGC	MS2	20
M1368	ACTTCTTGTAAGGCGCTGCA	MS2	20
M1369	CTTCTTGTAAGGCGCTGCAT	MS2	20
M1370	TTCTTGTAAGGCGCTGCATC	MS2	20
M1371	TCTTGTAAGGCGCTGCATCC	MS2	20
M1372	CTTGTAAGGCGCTGCATCCT	MS2	20
M1373	TTGTAAGGCGCTGCATCCTG	MS2	20
M1374	TGTAAGGCGCTGCATCCTGC	MS2	20
M1375	GTAAGGCGCTGCATCCTGCA	MS2	20
M1376	TAAGGCGCTGCATCCTGCAA	MS2	20
M1377	AAGGCGCTGCATCCTGCAAC	MS2	20
M1378	AGGCGCTGCATCCTGCAACT	MS2	20
M1379	GGCGCTGCATCCTGCAACTT	MS2	20
M1380	GCGCTGCATCCTGCAACTTG	MS2	20
M1381	CGCTGCATCCTGCAACTTGT	MS2	20
M1382	GCTGCATCCTGCAACTTGTG	MS2	20
M1383	CTGCATCCTGCAACTTGTGC	MS2	20
M1384	TGCATCCTGCAACTTGTGCC	MS2	20
M1385	GCATCCTGCAACTTGTGCCC	MS2	20
M1386	CATCCTGCAACTTGTGCCCC	MS2	20
M1387	ATCCTGCAACTTGTGCCCCA	MS2	20
M1388	TCCTGCAACTTGTGCCCCAT	MS2	20
M1389	CCTGCAACTTGTGCCCCATA	MS2	20
M1390	CTGCAACTTGTGCCCCATAG	MS2	20
M1391	TGCAACTTGTGCCCCATAGG	MS2	20
M1392	GCAACTTGTGCCCCATAGGA	MS2	20
M1393	CAACTTGTGCCCCATAGGAG	MS2	20
M1394	AACTTGTGCCCCATAGGAGC	MS2	20
M1395	ACTTGTGCCCCATAGGAGCA	MS2	20
M1396	CTTGTGCCCCATAGGAGCAC	MS2	20
M1397	TTGTGCCCCATAGGAGCACC	MS2	20
M1398	TGTGCCCCATAGGAGCACCG	MS2	20
M1399	GTGCCCCATAGGAGCACCGT	MS2	20
M1400	TGCCCCATAGGAGCACCGTT	MS2	20
M1401	GCCCCATAGGAGCACCGTTG	MS2	20
M1402	CCCCATAGGAGCACCGTTGG	MS2	20
M1403	CCCATAGGAGCACCGTTGGA	MS2	20
M1404	CCATAGGAGCACCGTTGGAG	MS2	20
M1405	CATAGGAGCACCGTTGGAGA	MS2	20
M1406	ATAGGAGCACCGTTGGAGAA	MS2	20
M1407	TAGGAGCACCGTTGGAGAAC	MS2	20
M1408	AGGAGCACCGTTGGAGAACG	MS2	20
M1409	GGAGCACCGTTGGAGAACGT	MS2	20
M1410	GAGCACCGTTGGAGAACGTG	MS2	20
M1411	AGCACCGTTGGAGAACGTGC	MS2	20
M1412	GCACCGTTGGAGAACGTGCA	MS2	20
M1413	CACCGTTGGAGAACGTGCAT	MS2	20
M1414	ACCGTTGGAGAACGTGCATT	MS2	20
M1415	CCGTTGGAGAACGTGCATTG	MS2	20
M1416	CGTTGGAGAACGTGCATTGC	MS2	20
M1417	GTTGGAGAACGTGCATTGCC	MS2	20
M1418	TTGGAGAACGTGCATTGCCC	MS2	20
M1419	TGGAGAACGTGCATTGCCCA	MS2	20
M1420	GGAGAACGTGCATTGCCCAA	MS2	20
M1421	GAGAACGTGCATTGCCCAAA	MS2	20
M1422	AGAACGTGCATTGCCCAAAC	MS2	20
M1423	GAACGTGCATTGCCCAAACA	MS2	20
M1424	AACGTGCATTGCCCAAACAA	MS2	20
M1425	ACGTGCATTGCCCAAACAAC	MS2	20
M1426	CGTGCATTGCCCAAACAACG	MS2	20
M1427	GTGCATTGCCCAAACAACGA	MS2	20
M1428	TGCATTGCCCAAACAACGAC	MS2	20
M1429	GCATTGCCCAAACAACGACG	MS2	20
M1430	CATTGCCCAAACAACGACGA	MS2	20
M1431	ATTGCCCAAACAACGACGAT	MS2	20
M1432	TTGCCCAAACAACGACGATC	MS2	20
M1433	TGCCCAAACAACGACGATCG	MS2	20
M1434	GCCCAAACAACGACGATCGG	MS2	20
M1435	CCCAAACAACGACGATCGGT	MS2	20
M1436	CCAAACAACGACGATCGGTA	MS2	20
M1437	CAAACAACGACGATCGGTAG	MS2	20
M1438	AAACAACGACGATCGGTAGC	MS2	20
M1439	AACAACGACGATCGGTAGCC	MS2	20
M1440	ACAACGACGATCGGTAGCCA	MS2	20
M1441	CAACGACGATCGGTAGCCAG	MS2	20
M1442	AACGACGATCGGTAGCCAGA	MS2	20
M1443	ACGACGATCGGTAGCCAGAG	MS2	20
M1444	CGACGATCGGTAGCCAGAGA	MS2	20
M1445	GACGATCGGTAGCCAGAGAG	MS2	20
M1446	ACGATCGGTAGCCAGAGAGG	MS2	20
M1447	CGATCGGTAGCCAGAGAGGA	MS2	20
M1448	GATCGGTAGCCAGAGAGGAG	MS2	20
M1449	ATCGGTAGCCAGAGAGGAGG	MS2	20
M1450	TCGGTAGCCAGAGAGGAGGT	MS2	20
M1451	CGGTAGCCAGAGAGGAGGTT	MS2	20
M1452	GGTAGCCAGAGAGGAGGTTG	MS2	20
M1453	GTAGCCAGAGAGGAGGTTGC	MS2	20
M1454	TAGCCAGAGAGGAGGTTGCC	MS2	20
M1455	AGCCAGAGAGGAGGTTGCCA	MS2	20
M1456	GCCAGAGAGGAGGTTGCCAA	MS2	20
M1457	CCAGAGAGGAGGTTGCCAAT	MS2	20
M1458	CAGAGAGGAGGTTGCCAATA	MS2	20
M1459	AGAGAGGAGGTTGCCAATAA	MS2	20
M1460	GAGAGGAGGTTGCCAATAAG	MS2	20
M1461	AGAGGAGGTTGCCAATAAGG	MS2	20
M1462	GAGGAGGTTGCCAATAAGGC	MS2	20
M1463	AGGAGGTTGCCAATAAGGCT	MS2	20
M1464	GGAGGTTGCCAATAAGGCTA	MS2	20
M1465	GAGGTTGCCAATAAGGCTAC	MS2	20
M1466	AGGTTGCCAATAAGGCTACG	MS2	20
M1467	GGTTGCCAATAAGGCTACGG	MS2	20
M1468	GTTGCCAATAAGGCTACGGA	MS2	20
M1469	TTGCCAATAAGGCTACGGAT	MS2	20
M1470	TGCCAATAAGGCTACGGATG	MS2	20
M1471	GCCAATAAGGCTACGGATGC	MS2	20
M1472	CCAATAAGGCTACGGATGCT	MS2	20
M1473	CAATAAGGCTACGGATGCTG	MS2	20
M1474	AATAAGGCTACGGATGCTGG	MS2	20
M1475	ATAAGGCTACGGATGCTGGT	MS2	20
M1476	TAAGGCTACGGATGCTGGTT	MS2	20
M1477	AAGGCTACGGATGCTGGTTT	MS2	20
M1478	AGGCTACGGATGCTGGTTTG	MS2	20
M1479	GGCTACGGATGCTGGTTTGT	MS2	20
M1480	GCTACGGATGCTGGTTTGTA	MS2	20
M1481	CTACGGATGCTGGTTTGTAA	MS2	20
M1482	TACGGATGCTGGTTTGTAAA	MS2	20
M1483	ACGGATGCTGGTTTGTAAAA	MS2	20
M1484	CGGATGCTGGTTTGTAAAAC	MS2	20
M1485	GGATGCTGGTTTGTAAAACA	MS2	20
M1486	GATGCTGGTTTGTAAAACAT	MS2	20
M1487	ATGCTGGTTTGTAAAACATC	MS2	20
M1488	TGCTGGTTTGTAAAACATCC	MS2	20
M1489	GCTGGTTTGTAAAACATCCG	MS2	20
M1490	CTGGTTTGTAAAACATCCGG	MS2	20
M1491	TGGTTTGTAAAACATCCGGA	MS2	20
M1492	GGTTTGTAAAACATCCGGAT	MS2	20
M1493	GTTTGTAAAACATCCGGATC	MS2	20
M1494	TTTGTAAAACATCCGGATCC	MS2	20
M1495	TTGTAAAACATCCGGATCCC	MS2	20
M1496	TGTAAAACATCCGGATCCCA	MS2	20
M1497	GTAAAACATCCGGATCCCAT	MS2	20
M1498	TAAAACATCCGGATCCCATG	MS2	20
M1499	AAAACATCCGGATCCCATGA	MS2	20
M1500	AAACATCCGGATCCCATGAC	MS2	20
M1501	AACATCCGGATCCCATGACA	MS2	20
M1502	ACATCCGGATCCCATGACAA	MS2	20
M1503	CATCCGGATCCCATGACAAG	MS2	20
M1504	ATCCGGATCCCATGACAAGG	MS2	20
M1505	TCCGGATCCCATGACAAGGA	MS2	20
M1506	CCGGATCCCATGACAAGGAT	MS2	20
M1507	CGGATCCCATGACAAGGATT	MS2	20
M1508	GGATCCCATGACAAGGATTT	MS2	20
M1509	GATCCCATGACAAGGATTTG	MS2	20
M1510	ATCCCATGACAAGGATTTGT	MS2	20
M1511	TCCCATGACAAGGATTTGTC	MS2	20
M1512	CCCATGACAAGGATTTGTCA	MS2	20
M1513	CCATGACAAGGATTTGTCAT	MS2	20
M1514	CATGACAAGGATTTGTCATG	MS2	20
M1515	ATGACAAGGATTTGTCATGT	MS2	20
M1516	TGACAAGGATTTGTCATGTA	MS2	20
M1517	GACAAGGATTTGTCATGTAA	MS2	20
M1518	ACAAGGATTTGTCATGTAAG	MS2	20
M1519	CAAGGATTTGTCATGTAAGA	MS2	20
M1520	AAGGATTTGTCATGTAAGAA	MS2	20
M1521	AGGATTTGTCATGTAAGAAA	MS2	20
M1522	GGATTTGTCATGTAAGAAAC	MS2	20
M1523	GATTTGTCATGTAAGAAACC	MS2	20
M1524	ATTTGTCATGTAAGAAACCT	MS2	20
M1525	TTTGTCATGTAAGAAACCTT	MS2	20
M1526	TTGTCATGTAAGAAACCTTC	MS2	20
M1527	TGTCATGTAAGAAACCTTCT	MS2	20
M1528	GTCATGTAAGAAACCTTCTC	MS2	20
M1529	TCATGTAAGAAACCTTCTCT	MS2	20
M1530	CATGTAAGAAACCTTCTCTA	MS2	20
M1531	ATGTAAGAAACCTTCTCTAT	MS2	20
M1532	TGTAAGAAACCTTCTCTATT	MS2	20
M1533	GTAAGAAACCTTCTCTATTT	MS2	20
M1534	TAAGAAACCTTCTCTATTTA	MS2	20
M1535	AAGAAACCTTCTCTATTTAT	MS2	20
M1536	AGAAACCTTCTCTATTTATC	MS2	20
M1537	GAAACCTTCTCTATTTATCT	MS2	20
M1538	AAACCTTCTCTATTTATCTG	MS2	20
M1539	AACCTTCTCTATTTATCTGA	MS2	20
M1540	ACCTTCTCTATTTATCTGAC	MS2	20
M1541	CCTTCTCTATTTATCTGACC	MS2	20
M1542	CTTCTCTATTTATCTGACCG	MS2	20
M1543	TTCTCTATTTATCTGACCGC	MS2	20
M1544	TCTCTATTTATCTGACCGCG	MS2	20
M1545	CTCTATTTATCTGACCGCGA	MS2	20
M1546	TCTATTTATCTGACCGCGAT	MS2	20
M1547	CTATTTATCTGACCGCGATC	MS2	20
M1548	TATTTATCTGACCGCGATCA	MS2	20
M1549	ATTTATCTGACCGCGATCAC	MS2	20
M1550	TTTATCTGACCGCGATCACC	MS2	20
M1551	TTATCTGACCGCGATCACCA	MS2	20
M1552	TATCTGACCGCGATCACCAT	MS2	20
M1553	ATCTGACCGCGATCACCATT	MS2	20
M1554	TCTGACCGCGATCACCATTC	MS2	20
M1555	CTGACCGCGATCACCATTCG	MS2	20
M1556	TGACCGCGATCACCATTCGC	MS2	20
M1557	GACCGCGATCACCATTCGCC	MS2	20
M1558	ACCGCGATCACCATTCGCCT	MS2	20
M1559	CCGCGATCACCATTCGCCTC	MS2	20
M1560	CGCGATCACCATTCGCCTCC	MS2	20
M1561	GCGATCACCATTCGCCTCCC	MS2	20
M1562	CGATCACCATTCGCCTCCCG	MS2	20
M1563	GATCACCATTCGCCTCCCGT	MS2	20
M1564	ATCACCATTCGCCTCCCGTA	MS2	20
M1565	TCACCATTCGCCTCCCGTAG	MS2	20
M1566	CACCATTCGCCTCCCGTAGC	MS2	20
M1567	ACCATTCGCCTCCCGTAGCT	MS2	20
M1568	CCATTCGCCTCCCGTAGCTT	MS2	20
M1569	CATTCGCCTCCCGTAGCTTA	MS2	20
M1570	ATTCGCCTCCCGTAGCTTAG	MS2	20
M1571	TTCGCCTCCCGTAGCTTAGC	MS2	20
M1572	TCGCCTCCCGTAGCTTAGCG	MS2	20
M1573	CGCCTCCCGTAGCTTAGCGA	MS2	20
M1574	GCCTCCCGTAGCTTAGCGAT	MS2	20
M1575	CCTCCCGTAGCTTAGCGATA	MS2	20
M1576	CTCCCGTAGCTTAGCGATAG	MS2	20
M1577	TCCCGTAGCTTAGCGATAGC	MS2	20
M1578	CCCGTAGCTTAGCGATAGCT	MS2	20
M1579	CCGTAGCTTAGCGATAGCTA	MS2	20
M1580	CGTAGCTTAGCGATAGCTAA	MS2	20
M1581	GTAGCTTAGCGATAGCTAAG	MS2	20
M1582	TAGCTTAGCGATAGCTAAGG	MS2	20
M1583	AGCTTAGCGATAGCTAAGGT	MS2	20
M1584	GCTTAGCGATAGCTAAGGTA	MS2	20
M1585	CTTAGCGATAGCTAAGGTAC	MS2	20
M1586	TTAGCGATAGCTAAGGTACG	MS2	20
M1587	TAGCGATAGCTAAGGTACGA	MS2	20
M1588	AGCGATAGCTAAGGTACGAC	MS2	20
M1589	GCGATAGCTAAGGTACGACG	MS2	20
M1590	CGATAGCTAAGGTACGACGG	MS2	20
M1591	GATAGCTAAGGTACGACGGG	MS2	20
M1592	ATAGCTAAGGTACGACGGGT	MS2	20
M1593	TAGCTAAGGTACGACGGGTC	MS2	20
M1594	AGCTAAGGTACGACGGGTCG	MS2	20
M1595	GCTAAGGTACGACGGGTCGC	MS2	20
M1596	CTAAGGTACGACGGGTCGCC	MS2	20
M1597	TAAGGTACGACGGGTCGCCT	MS2	20
M1598	AAGGTACGACGGGTCGCCTC	MS2	20
M1599	AGGTACGACGGGTCGCCTCG	MS2	20
M1600	GGTACGACGGGTCGCCTCGT	MS2	20
M1601	GTACGACGGGTCGCCTCGTC	MS2	20
M1602	TACGACGGGTCGCCTCGTCA	MS2	20
M1603	ACGACGGGTCGCCTCGTCAT	MS2	20
M1604	CGACGGGTCGCCTCGTCATT	MS2	20
M1605	GACGGGTCGCCTCGTCATTA	MS2	20
M1606	ACGGGTCGCCTCGTCATTAC	MS2	20
M1607	CGGGTCGCCTCGTCATTACC	MS2	20
M1608	GGGTCGCCTCGTCATTACCA	MS2	20
M1609	GGTCGCCTCGTCATTACCAG	MS2	20
M1610	GTCGCCTCGTCATTACCAGA	MS2	20
M1611	TCGCCTCGTCATTACCAGAA	MS2	20
M1612	CGCCTCGTCATTACCAGAAC	MS2	20
M1613	GCCTCGTCATTACCAGAACC	MS2	20
M1614	CCTCGTCATTACCAGAACCT	MS2	20
M1615	CTCGTCATTACCAGAACCTA	MS2	20
M1616	TCGTCATTACCAGAACCTAA	MS2	20
M1617	CGTCATTACCAGAACCTAAG	MS2	20
M1618	GTCATTACCAGAACCTAAGG	MS2	20
M1619	TCATTACCAGAACCTAAGGT	MS2	20
M1620	CATTACCAGAACCTAAGGTC	MS2	20
M1621	ATTACCAGAACCTAAGGTCG	MS2	20
M1622	TTACCAGAACCTAAGGTCGG	MS2	20
M1623	TACCAGAACCTAAGGTCGGA	MS2	20
M1624	ACCAGAACCTAAGGTCGGAT	MS2	20
M1625	CCAGAACCTAAGGTCGGATG	MS2	20
M1626	CAGAACCTAAGGTCGGATGC	MS2	20
M1627	AGAACCTAAGGTCGGATGCT	MS2	20
M1628	GAACCTAAGGTCGGATGCTT	MS2	20
M1629	AACCTAAGGTCGGATGCTTT	MS2	20
M1630	ACCTAAGGTCGGATGCTTTG	MS2	20
M1631	CCTAAGGTCGGATGCTTTGT	MS2	20
M1632	CTAAGGTCGGATGCTTTGTG	MS2	20
M1633	TAAGGTCGGATGCTTTGTGA	MS2	20
M1634	AAGGTCGGATGCTTTGTGAG	MS2	20
M1635	AGGTCGGATGCTTTGTGAGC	MS2	20
M1636	GGTCGGATGCTTTGTGAGCA	MS2	20
M1637	GTCGGATGCTTTGTGAGCAA	MS2	20
M1638	TCGGATGCTTTGTGAGCAAT	MS2	20
M1639	CGGATGCTTTGTGAGCAATT	MS2	20
M1640	GGATGCTTTGTGAGCAATTC	MS2	20
M1641	GATGCTTTGTGAGCAATTCG	MS2	20
M1642	ATGCTTTGTGAGCAATTCGT	MS2	20
M1643	TGCTTTGTGAGCAATTCGTC	MS2	20
M1644	GCTTTGTGAGCAATTCGTCC	MS2	20
M1645	CTTTGTGAGCAATTCGTCCC	MS2	20
M1646	TTTGTGAGCAATTCGTCCCT	MS2	20
M1647	TTGTGAGCAATTCGTCCCTT	MS2	20
M1648	TGTGAGCAATTCGTCCCTTA	MS2	20
M1649	GTGAGCAATTCGTCCCTTAA	MS2	20
M1650	TGAGCAATTCGTCCCTTAAG	MS2	20
M1651	GAGCAATTCGTCCCTTAAGT	MS2	20
M1652	AGCAATTCGTCCCTTAAGTA	MS2	20
M1653	GCAATTCGTCCCTTAAGTAA	MS2	20
M1654	CAATTCGTCCCTTAAGTAAG	MS2	20
M1655	AATTCGTCCCTTAAGTAAGC	MS2	20
M1656	ATTCGTCCCTTAAGTAAGCA	MS2	20
M1657	TTCGTCCCTTAAGTAAGCAA	MS2	20
M1658	TCGTCCCTTAAGTAAGCAAT	MS2	20
M1659	CGTCCCTTAAGTAAGCAATT	MS2	20
M1660	GTCCCTTAAGTAAGCAATTG	MS2	20
M1661	TCCCTTAAGTAAGCAATTGC	MS2	20
M1662	CCCTTAAGTAAGCAATTGCT	MS2	20
M1663	CCTTAAGTAAGCAATTGCTG	MS2	20
M1664	CTTAAGTAAGCAATTGCTGT	MS2	20
M1665	TTAAGTAAGCAATTGCTGTA	MS2	20
M1666	TAAGTAAGCAATTGCTGTAA	MS2	20
M1667	AAGTAAGCAATTGCTGTAAA	MS2	20
M1668	AGTAAGCAATTGCTGTAAAG	MS2	20
M1669	GTAAGCAATTGCTGTAAAGT	MS2	20
M1670	TAAGCAATTGCTGTAAAGTC	MS2	20
M1671	AAGCAATTGCTGTAAAGTCG	MS2	20
M1672	AGCAATTGCTGTAAAGTCGT	MS2	20
M1673	GCAATTGCTGTAAAGTCGTC	MS2	20
M1674	CAATTGCTGTAAAGTCGTCA	MS2	20
M1675	AATTGCTGTAAAGTCGTCAC	MS2	20
M1676	ATTGCTGTAAAGTCGTCACT	MS2	20
M1677	TTGCTGTAAAGTCGTCACTG	MS2	20
M1678	TGCTGTAAAGTCGTCACTGT	MS2	20
M1679	GCTGTAAAGTCGTCACTGTG	MS2	20
M1680	CTGTAAAGTCGTCACTGTGC	MS2	20
M1681	TGTAAAGTCGTCACTGTGCG	MS2	20
M1682	GTAAAGTCGTCACTGTGCGG	MS2	20
M1683	TAAAGTCGTCACTGTGCGGA	MS2	20
M1684	AAAGTCGTCACTGTGCGGAT	MS2	20
M1685	AAGTCGTCACTGTGCGGATC	MS2	20
M1686	AGTCGTCACTGTGCGGATCA	MS2	20
M1687	GTCGTCACTGTGCGGATCAC	MS2	20
M1688	TCGTCACTGTGCGGATCACC	MS2	20
M1689	CGTCACTGTGCGGATCACCG	MS2	20
M1690	GTCACTGTGCGGATCACCGC	MS2	20
M1691	TCACTGTGCGGATCACCGCT	MS2	20
M1692	CACTGTGCGGATCACCGCTT	MS2	20
M1693	ACTGTGCGGATCACCGCTTC	MS2	20
M1694	CTGTGCGGATCACCGCTTCC	MS2	20
M1695	TGTGCGGATCACCGCTTCCA	MS2	20
M1696	GTGCGGATCACCGCTTCCAG	MS2	20
M1697	TGCGGATCACCGCTTCCAGT	MS2	20
M1698	GCGGATCACCGCTTCCAGTA	MS2	20
M1699	CGGATCACCGCTTCCAGTAG	MS2	20
M1700	GGATCACCGCTTCCAGTAGC	MS2	20
M1701	GATCACCGCTTCCAGTAGCG	MS2	20
M1702	ATCACCGCTTCCAGTAGCGA	MS2	20
M1703	TCACCGCTTCCAGTAGCGAC	MS2	20
M1704	CACCGCTTCCAGTAGCGACA	MS2	20
M1705	ACCGCTTCCAGTAGCGACAG	MS2	20
M1706	CCGCTTCCAGTAGCGACAGA	MS2	20
M1707	CGCTTCCAGTAGCGACAGAA	MS2	20
M1708	GCTTCCAGTAGCGACAGAAG	MS2	20
M1709	CTTCCAGTAGCGACAGAAGC	MS2	20
M1710	TTCCAGTAGCGACAGAAGCA	MS2	20
M1711	TCCAGTAGCGACAGAAGCAA	MS2	20
M1712	CCAGTAGCGACAGAAGCAAT	MS2	20
M1713	CAGTAGCGACAGAAGCAATT	MS2	20
M1714	AGTAGCGACAGAAGCAATTG	MS2	20
M1715	GTAGCGACAGAAGCAATTGA	MS2	20
M1716	TAGCGACAGAAGCAATTGAT	MS2	20
M1717	AGCGACAGAAGCAATTGATT	MS2	20
M1718	GCGACAGAAGCAATTGATTG	MS2	20
M1719	CGACAGAAGCAATTGATTGG	MS2	20
M1720	GACAGAAGCAATTGATTGGT	MS2	20
M1721	ACAGAAGCAATTGATTGGTA	MS2	20
M1722	CAGAAGCAATTGATTGGTAA	MS2	20
M1723	AGAAGCAATTGATTGGTAAA	MS2	20
M1724	GAAGCAATTGATTGGTAAAT	MS2	20
M1725	AAGCAATTGATTGGTAAATT	MS2	20
M1726	AGCAATTGATTGGTAAATTT	MS2	20
M1727	GCAATTGATTGGTAAATTTC	MS2	20
M1728	CAATTGATTGGTAAATTTCG	MS2	20
M1729	AATTGATTGGTAAATTTCGA	MS2	20
M1730	ATTGATTGGTAAATTTCGAG	MS2	20
M1731	TTGATTGGTAAATTTCGAGA	MS2	20
M1732	TGATTGGTAAATTTCGAGAG	MS2	20
M1733	GATTGGTAAATTTCGAGAGA	MS2	20
M1734	ATTGGTAAATTTCGAGAGAA	MS2	20
M1735	TTGGTAAATTTCGAGAGAAA	MS2	20
M1736	TGGTAAATTTCGAGAGAAAG	MS2	20
M1737	GGTAAATTTCGAGAGAAAGA	MS2	20
M1738	GTAAATTTCGAGAGAAAGAT	MS2	20
M1739	TAAATTTCGAGAGAAAGATC	MS2	20
M1740	AAATTTCGAGAGAAAGATCG	MS2	20
M1741	AATTTCGAGAGAAAGATCGC	MS2	20
M1742	ATTTCGAGAGAAAGATCGCG	MS2	20
M1743	TTTCGAGAGAAAGATCGCGA	MS2	20
M1744	TTCGAGAGAAAGATCGCGAG	MS2	20
M1745	TCGAGAGAAAGATCGCGAGG	MS2	20
M1746	CGAGAGAAAGATCGCGAGGA	MS2	20
M1747	GAGAGAAAGATCGCGAGGAA	MS2	20
M1748	AGAGAAAGATCGCGAGGAAG	MS2	20
M1749	GAGAAAGATCGCGAGGAAGA	MS2	20
M1750	AGAAAGATCGCGAGGAAGAT	MS2	20
M1751	GAAAGATCGCGAGGAAGATC	MS2	20
M1752	AAAGATCGCGAGGAAGATCA	MS2	20
M1753	AAGATCGCGAGGAAGATCAA	MS2	20
M1754	AGATCGCGAGGAAGATCAAT	MS2	20
M1755	GATCGCGAGGAAGATCAATA	MS2	20
M1756	ATCGCGAGGAAGATCAATAC	MS2	20
M1757	TCGCGAGGAAGATCAATACA	MS2	20
M1758	CGCGAGGAAGATCAATACAT	MS2	20
M1759	GCGAGGAAGATCAATACATA	MS2	20
M1760	CGAGGAAGATCAATACATAA	MS2	20
M1761	GAGGAAGATCAATACATAAA	MS2	20
M1762	AGGAAGATCAATACATAAAG	MS2	20
M1763	GGAAGATCAATACATAAAGA	MS2	20
M1764	GAAGATCAATACATAAAGAG	MS2	20
M1765	AAGATCAATACATAAAGAGT	MS2	20
M1766	AGATCAATACATAAAGAGTT	MS2	20
M1767	GATCAATACATAAAGAGTTG	MS2	20
M1768	ATCAATACATAAAGAGTTGA	MS2	20
M1769	TCAATACATAAAGAGTTGAA	MS2	20
M1770	CAATACATAAAGAGTTGAAC	MS2	20
M1771	AATACATAAAGAGTTGAACT	MS2	20
M1772	ATACATAAAGAGTTGAACTT	MS2	20
M1773	TACATAAAGAGTTGAACTTC	MS2	20
M1774	ACATAAAGAGTTGAACTTCT	MS2	20
M1775	CATAAAGAGTTGAACTTCTT	MS2	20
M1776	ATAAAGAGTTGAACTTCTTT	MS2	20
M1777	TAAAGAGTTGAACTTCTTTG	MS2	20
M1778	AAAGAGTTGAACTTCTTTGT	MS2	20
M1779	AAGAGTTGAACTTCTTTGTT	MS2	20
M1780	AGAGTTGAACTTCTTTGTTG	MS2	20
M1781	GAGTTGAACTTCTTTGTTGT	MS2	20
M1782	AGTTGAACTTCTTTGTTGTC	MS2	20
M1783	GTTGAACTTCTTTGTTGTCT	MS2	20
M1784	TTGAACTTCTTTGTTGTCTT	MS2	20
M1785	TGAACTTCTTTGTTGTCTTC	MS2	20
M1786	GAACTTCTTTGTTGTCTTCG	MS2	20
M1787	AACTTCTTTGTTGTCTTCGA	MS2	20
M1788	ACTTCTTTGTTGTCTTCGAC	MS2	20
M1789	CTTCTTTGTTGTCTTCGACA	MS2	20
M1790	TTCTTTGTTGTCTTCGACAT	MS2	20
M1791	TCTTTGTTGTCTTCGACATG	MS2	20
M1792	CTTTGTTGTCTTCGACATGG	MS2	20
M1793	TTTGTTGTCTTCGACATGGG	MS2	20
M1794	TTGTTGTCTTCGACATGGGT	MS2	20
M1795	TGTTGTCTTCGACATGGGTA	MS2	20
M1796	GTTGTCTTCGACATGGGTAA	MS2	20
M1797	TTGTCTTCGACATGGGTAAT	MS2	20
M1798	TGTCTTCGACATGGGTAATC	MS2	20
M1799	GTCTTCGACATGGGTAATCC	MS2	20
M1800	TCTTCGACATGGGTAATCCT	MS2	20
M1801	CTTCGACATGGGTAATCCTC	MS2	20
M1802	TTCGACATGGGTAATCCTCA	MS2	20
M1803	TCGACATGGGTAATCCTCAT	MS2	20
M1804	CGACATGGGTAATCCTCATG	MS2	20
M1805	GACATGGGTAATCCTCATGT	MS2	20
M1806	ACATGGGTAATCCTCATGTT	MS2	20
M1807	CATGGGTAATCCTCATGTTT	MS2	20
M1808	ATGGGTAATCCTCATGTTTG	MS2	20
M1809	TGGGTAATCCTCATGTTTGA	MS2	20
M1810	GGGTAATCCTCATGTTTGAA	MS2	20
M1811	GGTAATCCTCATGTTTGAAT	MS2	20
M1812	GTAATCCTCATGTTTGAATG	MS2	20
M1813	TAATCCTCATGTTTGAATGG	MS2	20
M1814	AATCCTCATGTTTGAATGGC	MS2	20
M1815	ATCCTCATGTTTGAATGGCC	MS2	20
M1816	TCCTCATGTTTGAATGGCCG	MS2	20
M1817	CCTCATGTTTGAATGGCCGG	MS2	20
M1818	CTCATGTTTGAATGGCCGGC	MS2	20
M1819	TCATGTTTGAATGGCCGGCG	MS2	20
M1820	CATGTTTGAATGGCCGGCGT	MS2	20
M1821	ATGTTTGAATGGCCGGCGTC	MS2	20
M1822	TGTTTGAATGGCCGGCGTCT	MS2	20
M1823	GTTTGAATGGCCGGCGTCTA	MS2	20
M1824	TTTGAATGGCCGGCGTCTAT	MS2	20
M1825	TTGAATGGCCGGCGTCTATT	MS2	20
M1826	TGAATGGCCGGCGTCTATTA	MS2	20
M1827	GAATGGCCGGCGTCTATTAG	MS2	20
M1828	AATGGCCGGCGTCTATTAGT	MS2	20
M1829	ATGGCCGGCGTCTATTAGTA	MS2	20
M1830	TGGCCGGCGTCTATTAGTAG	MS2	20
M1831	GGCCGGCGTCTATTAGTAGA	MS2	20
M1832	GCCGGCGTCTATTAGTAGAT	MS2	20
M1833	CCGGCGTCTATTAGTAGATG	MS2	20
M1834	CGGCGTCTATTAGTAGATGC	MS2	20
M1835	GGCGTCTATTAGTAGATGCC	MS2	20
M1836	GCGTCTATTAGTAGATGCCG	MS2	20
M1837	CGTCTATTAGTAGATGCCGG	MS2	20
M1838	GTCTATTAGTAGATGCCGGA	MS2	20
M1839	TCTATTAGTAGATGCCGGAG	MS2	20
M1840	CTATTAGTAGATGCCGGAGT	MS2	20
M1841	TATTAGTAGATGCCGGAGTT	MS2	20
M1842	ATTAGTAGATGCCGGAGTTT	MS2	20
M1843	TTAGTAGATGCCGGAGTTTG	MS2	20
M1844	TAGTAGATGCCGGAGTTTGC	MS2	20
M1845	AGTAGATGCCGGAGTTTGCT	MS2	20
M1846	GTAGATGCCGGAGTTTGCTG	MS2	20
M1847	TAGATGCCGGAGTTTGCTGC	MS2	20
M1848	AGATGCCGGAGTTTGCTGCG	MS2	20
M1849	GATGCCGGAGTTTGCTGCGA	MS2	20
M1850	ATGCCGGAGTTTGCTGCGAT	MS2	20
M1851	TGCCGGAGTTTGCTGCGATT	MS2	20
M1852	GCCGGAGTTTGCTGCGATTG	MS2	20
M1853	CCGGAGTTTGCTGCGATTGC	MS2	20
M1854	CGGAGTTTGCTGCGATTGCT	MS2	20
M1855	GGAGTTTGCTGCGATTGCTG	MS2	20
M1856	GAGTTTGCTGCGATTGCTGA	MS2	20
M1857	AGTTTGCTGCGATTGCTGAG	MS2	20
M1858	GTTTGCTGCGATTGCTGAGG	MS2	20
M1859	TTTGCTGCGATTGCTGAGGG	MS2	20
M1860	TTGCTGCGATTGCTGAGGGA	MS2	20
M1861	TGCTGCGATTGCTGAGGGAA	MS2	20
M1862	GCTGCGATTGCTGAGGGAAT	MS2	20
M1863	CTGCGATTGCTGAGGGAATC	MS2	20
M1864	TGCGATTGCTGAGGGAATCG	MS2	20
M1865	GCGATTGCTGAGGGAATCGG	MS2	20
M1866	CGATTGCTGAGGGAATCGGG	MS2	20
M1867	GATTGCTGAGGGAATCGGGT	MS2	20
M1868	ATTGCTGAGGGAATCGGGTT	MS2	20
M1869	TTGCTGAGGGAATCGGGTTT	MS2	20
M1870	TGCTGAGGGAATCGGGTTTC	MS2	20
M1871	GCTGAGGGAATCGGGTTTCC	MS2	20
M1872	CTGAGGGAATCGGGTTTCCA	MS2	20
M1873	TGAGGGAATCGGGTTTCCAT	MS2	20
M1874	GAGGGAATCGGGTTTCCATC	MS2	20
M1875	AGGGAATCGGGTTTCCATCT	MS2	20
M1876	GGGAATCGGGTTTCCATCTT	MS2	20
M1877	GGAATCGGGTTTCCATCTTT	MS2	20
M1878	GAATCGGGTTTCCATCTTTT	MS2	20
M1879	AATCGGGTTTCCATCTTTTA	MS2	20
M1880	ATCGGGTTTCCATCTTTTAG	MS2	20
M1881	TCGGGTTTCCATCTTTTAGG	MS2	20
M1882	CGGGTTTCCATCTTTTAGGA	MS2	20
M1883	GGGTTTCCATCTTTTAGGAG	MS2	20
M1884	GGTTTCCATCTTTTAGGAGA	MS2	20
M1885	GTTTCCATCTTTTAGGAGAC	MS2	20
M1886	TTTCCATCTTTTAGGAGACC	MS2	20
M1887	TTCCATCTTTTAGGAGACCT	MS2	20
M1888	TCCATCTTTTAGGAGACCTT	MS2	20
M1889	CCATCTTTTAGGAGACCTTG	MS2	20
M1890	CATCTTTTAGGAGACCTTGC	MS2	20
M1891	ATCTTTTAGGAGACCTTGCA	MS2	20
M1892	TCTTTTAGGAGACCTTGCAT	MS2	20
M1893	CTTTTAGGAGACCTTGCATT	MS2	20
M1894	TTTTAGGAGACCTTGCATTG	MS2	20
M1895	TTTAGGAGACCTTGCATTGC	MS2	20
M1896	TTAGGAGACCTTGCATTGCC	MS2	20
M1897	TAGGAGACCTTGCATTGCCT	MS2	20
M1898	AGGAGACCTTGCATTGCCTT	MS2	20
M1899	GGAGACCTTGCATTGCCTTA	MS2	20
M1900	GAGACCTTGCATTGCCTTAA	MS2	20
M1901	AGACCTTGCATTGCCTTAAC	MS2	20
M1902	GACCTTGCATTGCCTTAACA	MS2	20
M1903	ACCTTGCATTGCCTTAACAA	MS2	20
M1904	CCTTGCATTGCCTTAACAAT	MS2	20
M1905	CTTGCATTGCCTTAACAATA	MS2	20
M1906	TTGCATTGCCTTAACAATAA	MS2	20
M1907	TGCATTGCCTTAACAATAAG	MS2	20
M1908	GCATTGCCTTAACAATAAGC	MS2	20
M1909	CATTGCCTTAACAATAAGCT	MS2	20
M1910	ATTGCCTTAACAATAAGCTC	MS2	20
M1911	TTGCCTTAACAATAAGCTCG	MS2	20
M1912	TGCCTTAACAATAAGCTCGC	MS2	20
M1913	GCCTTAACAATAAGCTCGCA	MS2	20
M1914	CCTTAACAATAAGCTCGCAG	MS2	20
M1915	CTTAACAATAAGCTCGCAGT	MS2	20
M1916	TTAACAATAAGCTCGCAGTC	MS2	20
M1917	TAACAATAAGCTCGCAGTCG	MS2	20
M1918	AACAATAAGCTCGCAGTCGG	MS2	20
M1919	ACAATAAGCTCGCAGTCGGA	MS2	20
M1920	CAATAAGCTCGCAGTCGGAA	MS2	20
M1921	AATAAGCTCGCAGTCGGAAT	MS2	20
M1922	ATAAGCTCGCAGTCGGAATT	MS2	20
M1923	TAAGCTCGCAGTCGGAATTC	MS2	20
M1924	AAGCTCGCAGTCGGAATTCG	MS2	20
M1925	AGCTCGCAGTCGGAATTCGT	MS2	20
M1926	GCTCGCAGTCGGAATTCGTA	MS2	20
M1927	CTCGCAGTCGGAATTCGTAG	MS2	20
M1928	TCGCAGTCGGAATTCGTAGC	MS2	20
M1929	CGCAGTCGGAATTCGTAGCG	MS2	20
M1930	GCAGTCGGAATTCGTAGCGA	MS2	20
M1931	CAGTCGGAATTCGTAGCGAA	MS2	20
M1932	AGTCGGAATTCGTAGCGAAA	MS2	20
M1933	GTCGGAATTCGTAGCGAAAA	MS2	20
M1934	TCGGAATTCGTAGCGAAAAT	MS2	20
M1935	CGGAATTCGTAGCGAAAATT	MS2	20
M1936	GGAATTCGTAGCGAAAATTG	MS2	20
M1937	GAATTCGTAGCGAAAATTGG	MS2	20
M1938	AATTCGTAGCGAAAATTGGA	MS2	20
M1939	ATTCGTAGCGAAAATTGGAA	MS2	20
M1940	TTCGTAGCGAAAATTGGAAT	MS2	20
M1941	TCGTAGCGAAAATTGGAATG	MS2	20
M1942	CGTAGCGAAAATTGGAATGG	MS2	20
M1943	GTAGCGAAAATTGGAATGGT	MS2	20
M1944	TAGCGAAAATTGGAATGGTT	MS2	20
M1945	AGCGAAAATTGGAATGGTTA	MS2	20
M1946	GCGAAAATTGGAATGGTTAG	MS2	20
M1947	CGAAAATTGGAATGGTTAGT	MS2	20
M1948	GAAAATTGGAATGGTTAGTT	MS2	20
M1949	AAAATTGGAATGGTTAGTTC	MS2	20
M1950	AAATTGGAATGGTTAGTTCC	MS2	20
M1951	AATTGGAATGGTTAGTTCCA	MS2	20
M1952	ATTGGAATGGTTAGTTCCAT	MS2	20
M1953	TTGGAATGGTTAGTTCCATA	MS2	20
M1954	TGGAATGGTTAGTTCCATAT	MS2	20
M1955	GGAATGGTTAGTTCCATATT	MS2	20
M1956	GAATGGTTAGTTCCATATTT	MS2	20
M1957	AATGGTTAGTTCCATATTTA	MS2	20
M1958	ATGGTTAGTTCCATATTTAA	MS2	20
M1959	TGGTTAGTTCCATATTTAAG	MS2	20
M1960	GGTTAGTTCCATATTTAAGT	MS2	20
M1961	GTTAGTTCCATATTTAAGTA	MS2	20
M1962	TTAGTTCCATATTTAAGTAC	MS2	20
M1963	TAGTTCCATATTTAAGTACG	MS2	20
M1964	AGTTCCATATTTAAGTACGA	MS2	20
M1965	GTTCCATATTTAAGTACGAA	MS2	20
M1966	TTCCATATTTAAGTACGAAC	MS2	20
M1967	TCCATATTTAAGTACGAACG	MS2	20
M1968	CCATATTTAAGTACGAACGC	MS2	20
M1969	CATATTTAAGTACGAACGCC	MS2	20
M1970	ATATTTAAGTACGAACGCCA	MS2	20
M1971	TATTTAAGTACGAACGCCAT	MS2	20
M1972	ATTTAAGTACGAACGCCATG	MS2	20
M1973	TTTAAGTACGAACGCCATGC	MS2	20
M1974	TTAAGTACGAACGCCATGCG	MS2	20
M1975	TAAGTACGAACGCCATGCGG	MS2	20
M1976	AAGTACGAACGCCATGCGGC	MS2	20
M1977	AGTACGAACGCCATGCGGCT	MS2	20
M1978	GTACGAACGCCATGCGGCTA	MS2	20
M1979	TACGAACGCCATGCGGCTAC	MS2	20
M1980	ACGAACGCCATGCGGCTACA	MS2	20
M1981	CGAACGCCATGCGGCTACAG	MS2	20
M1982	GAACGCCATGCGGCTACAGG	MS2	20
M1983	AACGCCATGCGGCTACAGGA	MS2	20
M1984	ACGCCATGCGGCTACAGGAA	MS2	20
M1985	CGCCATGCGGCTACAGGAAG	MS2	20
M1986	GCCATGCGGCTACAGGAAGC	MS2	20
M1987	CCATGCGGCTACAGGAAGCT	MS2	20
M1988	CATGCGGCTACAGGAAGCTC	MS2	20
M1989	ATGCGGCTACAGGAAGCTCT	MS2	20
M1990	TGCGGCTACAGGAAGCTCTA	MS2	20
M1991	GCGGCTACAGGAAGCTCTAC	MS2	20
M1992	CGGCTACAGGAAGCTCTACA	MS2	20
M1993	GGCTACAGGAAGCTCTACAC	MS2	20
M1994	GCTACAGGAAGCTCTACACC	MS2	20
M1995	CTACAGGAAGCTCTACACCA	MS2	20
M1996	TACAGGAAGCTCTACACCAC	MS2	20
M1997	ACAGGAAGCTCTACACCACC	MS2	20
M1998	CAGGAAGCTCTACACCACCA	MS2	20
M1999	AGGAAGCTCTACACCACCAA	MS2	20
[truncated: 16,115 more rows]

## Sheet: edgeR_log_cpm
	Ctrl 1	MOI 10 - 1	MOI 100 - 1	Ctrl 2	MOI 10 - 2	MOI 100 - 2	Ctrl 3	MOI 10 - 3	MOI 100 - 3	Length	Type of guide
M1	1.99965	5.98981	-1.22644	2.12514	1.19469	4.1007	1.76238	-3.40579	0.366216	20	MS2 targeting
M2	5.2377	5.50216	0.202186	5.17705	1.82378	1.47683	4.90796	3.6826	5.79356	20	MS2 targeting
M3	6.55145	8.66803	7.89298	6.65213	6.53997	10.2064	6.57297	9.105	7.82607	20	MS2 targeting
M4	2.81051	0.178694	0.644891	2.80018	-2.04891	-1.84726	2.79422	3.30366	4.59268	20	MS2 targeting
M5	4.02061	8.59678	0.0664604	4.05673	5.11231	4.54562	4.16985	0.763502	3.19379	20	MS2 targeting
M6	5.83058	7.19321	4.47396	5.74915	6.55575	7.61154	5.78038	4.05379	8.10242	20	MS2 targeting
M12	3.9958	4.95657	3.26614	4.02452	0.874999	4.39099	4.23981	5.40395	2.49683	20	MS2 targeting
M13	4.54827	5.25825	4.33319	4.48336	6.186	5.22743	4.72673	5.91783	7.31423	20	MS2 targeting
M14	2.64804	-1.17116	3.28154	2.99563	-1.0919	3.70806	2.46266	0.0790259	1.02332	20	MS2 targeting
M15	3.18878	4.95257	6.03577	2.91005	4.34861	-0.570217	3.53688	-0.609351	0.684964	20	MS2 targeting
M16	6.59671	9.74765	7.42454	6.3798	2.53974	6.26475	6.28752	9.17229	7.83348	20	MS2 targeting
M17	4.84767	7.53898	6.50151	4.45544	2.97492	3.69343	4.38866	5.5979	6.00877	20	MS2 targeting
M18	4.78823	6.58697	7.49232	4.74624	4.99886	8.56453	4.75886	6.96472	5.14524	20	MS2 targeting
M19	4.64878	8.71808	2.37266	4.86772	4.44216	7.0801	5.22017	5.20825	3.01574	20	MS2 targeting
M20	2.40589	-3.31956	-6.13898	1.33637	2.39126	6.99018	1.92221	-2.51857	-3.05384	20	MS2 targeting
M21	4.60351	5.69167	4.09237	4.25021	9.19614	7.39354	4.69388	3.55065	4.98993	20	MS2 targeting
M22	0.964405	-1.48161	-1.62559	1.66367	4.41934	-1.28706	1.64506	5.39023	-2.14144	20	MS2 targeting
M23	1.27601	-3.31956	-2.17931	1.62121	4.35665	-2.77542	1.6297	5.37916	-1.58691	20	MS2 targeting
M24	3.29021	0.930268	1.73103	3.60899	-0.113881	8.93671	3.19467	2.31738	-0.874753	20	MS2 targeting
M25	3.16672	1.27589	-0.439758	3.40308	-2.96659	8.88292	2.81474	3.87617	4.0974	20	MS2 targeting
M27	1.40221	-1.87772	-1.62559	1.37094	-1.0919	-1.84726	1.56657	2.40733	-0.0435375	20	MS2 targeting
M28	3.12615	5.24849	5.65599	3.25823	3.01607	2.54009	3.66295	2.94669	4.00496	20	MS2 targeting
M29	3.77446	4.2227	1.43289	3.75029	7.03887	1.60743	4.14306	4.99996	4.43157	20	MS2 targeting
M31	2.99708	-1.48161	-3.08945	3.33028	4.00462	4.24814	3.40776	-1.01402	-1.18733	20	MS2 targeting
M32	1.94885	-0.194401	5.65599	2.24181	3.32527	1.4068	1.98391	1.41119	2.44148	20	MS2 targeting
M33	-1.04507	-3.31956	-3.08945	-0.0537085	-6.13898	-6.13898	-0.712233	2.8214	-1.18733	20	MS2 targeting
M34	-1.78133	-3.31956	-3.08945	-0.605504	-6.13898	-2.77542	-0.563587	2.75443	-2.14144	20	MS2 targeting
M35	3.64002	6.33067	-1.22644	3.88197	6.59532	4.40901	4.51525	6.14236	7.72683	20	MS2 targeting
M36	3.59447	6.31674	-2.17931	3.75029	6.59702	3.91139	4.48783	6.15864	7.68425	20	MS2 targeting
M37	5.27736	7.45311	0.737182	5.38163	6.06622	3.94883	6.06649	6.77077	6.94784	20	MS2 targeting
M38	3.23191	2.24574	1.31805	3.66927	4.04494	3.92397	4.00702	6.2782	4.4457	20	MS2 targeting
M40	1.61266	4.64078	3.79242	2.34975	3.68556	-0.0935013	2.20729	-1.57845	-1.18733	20	MS2 targeting
M41	4.77808	8.32508	7.60224	4.84792	5.02429	6.75328	5.09153	6.79284	4.88492	20	MS2 targeting
M42	4.81258	6.7282	7.73966	5.06538	7.4252	6.92593	5.39387	5.29033	7.67677	20	MS2 targeting
M43	3.65277	4.1891	1.97798	4.11398	8.77897	1.94046	4.73034	5.41484	7.49161	20	MS2 targeting
M44	4.02552	4.93646	5.71108	4.24556	9.58128	6.35118	4.9503	5.60979	6.459	20	MS2 targeting
M45	4.93248	9.37091	7.9776	5.24502	7.78647	9.67963	5.63699	7.71122	8.17792	20	MS2 targeting
M46	6.48793	8.52485	8.81864	6.72201	8.38496	8.54225	7.06777	8.62386	8.17103	20	MS2 targeting
M47	3.09378	5.18854	3.18653	3.37354	5.38784	0.414504	3.49935	6.63773	3.01574	20	MS2 targeting
M48	4.61659	10.0952	6.86968	4.93858	5.44922	7.97884	5.29632	8.00616	7.05199	20	MS2 targeting
M49	3.49175	5.29662	6.76943	3.39049	7.22697	-1.28706	3.9648	3.10293	3.57436	20	MS2 targeting
M50	5.16835	8.59966	8.15798	5.12988	9.60001	1.0868	5.4895	4.16757	8.81381	20	MS2 targeting
M51	1.27601	2.44111	2.99421	1.45391	-0.778722	-1.84726	1.69018	2.45029	-3.05384	20	MS2 targeting
M53	3.01201	1.89184	1.19326	3.0972	0.683948	0.895536	3.09193	2.06442	1.52729	20	MS2 targeting
M54	1.84154	1.98878	0.905742	2.10474	-1.0919	-0.0935013	2.27796	0.0790259	-0.400092	20	MS2 targeting
M55	4.74868	2.95455	2.85696	4.78521	8.49321	3.07956	5.14383	4.7174	2.38392	20	MS2 targeting
M56	3.81473	1.42191	1.93965	4.17395	1.99821	1.78353	4.31616	0.763502	2.22909	20	MS2 targeting
M57	4.13182	2.19246	4.64453	4.17395	2.29424	3.8599	4.67903	2.3404	3.99539	20	MS2 targeting
M58	1.61266	-6.13898	1.53926	1.83442	0.961805	1.72719	1.48356	0.543118	-2.14144	20	MS2 targeting
M59	5.1991	4.55368	4.98288	5.52092	6.80796	4.36353	5.67489	5.01434	6.09426	20	MS2 targeting
M60	7.72537	8.7616	10.255	8.01806	11.5991	8.7345	7.98542	8.58825	8.3564	20	MS2 targeting
M61	8.50215	9.15379	9.95489	8.65198	11.6916	11.153	8.72454	10.5739	9.48127	20	MS2 targeting
M62	6.41635	6.22354	7.98761	6.32464	4.95192	10.3015	6.39249	7.91039	7.95951	20	MS2 targeting
M63	7.4818	7.80278	8.23617	7.43892	8.8945	10.0489	7.46773	6.90807	10.7215	20	MS2 targeting
M64	7.54216	8.89811	8.98051	7.53542	9.33296	9.30568	7.75731	9.94558	8.80047	20	MS2 targeting
M65	5.83128	7.49909	7.99522	5.7606	9.80376	7.53872	6.19793	6.86407	7.07832	20	MS2 targeting
M66	5.17167	3.4045	8.60793	5.20247	6.14948	5.83572	5.4153	2.29399	7.53275	20	MS2 targeting
M67	4.83234	6.29004	7.64158	4.95861	6.7451	7.8765	5.04308	3.98972	5.74866	20	MS2 targeting
M68	5.90642	6.97789	6.57369	6.22008	8.48361	7.26709	6.29545	6.50523	6.5664	20	MS2 targeting
M69	5.25454	6.83961	5.64412	5.38269	3.62035	4.1551	5.44413	4.74785	4.95577	20	MS2 targeting
M70	2.67954	1.0549	6.49326	3.26744	0.683948	0.789467	3.27585	1.0693	1.52729	20	MS2 targeting
M71	4.53972	8.9033	3.46817	4.93136	5.80667	4.94816	4.792	2.75443	4.59268	20	MS2 targeting
M72	0.670403	2.72993	-1.62559	1.31877	2.91091	0.264207	0.711175	1.01311	1.5795	20	MS2 targeting
M73	5.73786	5.89294	1.43289	5.89139	6.30907	5.7393	5.73714	4.63602	6.53203	20	MS2 targeting
M74	6.16862	7.62318	6.71373	6.20399	8.17334	8.15669	6.22693	6.68345	7.21354	20	MS2 targeting
M75	7.47329	7.83192	8.87623	7.58642	8.5521	8.27749	7.82736	7.99578	8.9502	20	MS2 targeting
M76	8.20674	9.11741	9.89386	8.14569	9.5815	10.3796	8.13144	8.77275	10.2545	20	MS2 targeting
M77	7.32107	8.15448	8.59988	7.16127	7.63539	7.88216	7.33581	8.65461	7.95827	20	MS2 targeting
M78	6.15131	5.39718	6.53885	6.29625	7.86529	7.4512	6.45156	7.07776	6.97368	20	MS2 targeting
M79	5.3467	8.13432	7.07815	5.50641	8.87681	3.4713	5.43642	7.21719	5.61119	20	MS2 targeting
M80	6.35768	8.87821	7.0693	6.41076	8.18917	7.45555	6.30636	8.04346	8.87189	20	MS2 targeting
M81	5.90642	6.70223	7.33323	6.13337	7.952	6.8701	6.03259	2.11868	6.51034	20	MS2 targeting
M82	6.55528	6.94504	7.88165	6.68556	8.59813	9.03282	6.82513	7.41989	8.08841	20	MS2 targeting
M83	5.80795	7.09954	6.93933	5.86964	8.39133	7.92819	6.08913	7.09054	9.56297	20	MS2 targeting
M84	5.09782	5.17143	6.68215	5.42444	8.05616	7.62991	5.72454	5.34257	8.99534	20	MS2 targeting
M85	3.79473	2.88908	2.97538	4.28915	5.16357	0.994338	4.94411	4.6173	2.91774	20	MS2 targeting
M86	3.742	2.07961	3.17007	4.06731	4.37258	-0.312258	4.8006	3.56048	1.47312	20	MS2 targeting
M88	1.43211	3.04749	2.50981	2.09443	1.82378	-0.570217	2.45397	2.8214	-1.18733	20	MS2 targeting
M89	1.38703	2.88908	0.546291	1.74499	2.29424	3.24921	1.87087	2.4713	-6.13898	20	MS2 targeting
M90	1.63854	-1.48161	-2.17931	1.64965	-2.96659	3.3271	1.13764	0.62038	-0.874753	20	MS2 targeting
M92	1.38703	-0.194401	1.12657	1.85899	-0.521553	0.0964108	1.6297	2.83767	-1.58691	20	MS2 targeting
M93	4.56861	4.83581	7.77955	4.782	2.91091	2.08198	4.48783	2.62917	0.945874	20	MS2 targeting
M94	5.01752	5.55325	7.88102	5.371	3.3088	6.86847	5.31204	2.66608	8.13713	20	MS2 targeting
M95	6.51961	7.51883	7.10546	6.80929	9.71322	6.53474	6.65064	7.15201	9.42241	20	MS2 targeting
M96	6.67146	6.87808	7.21584	6.8653	9.29585	7.14067	6.94128	6.92244	8.02334	20	MS2 targeting
M97	5.85423	5.57162	6.62894	6.01813	4.6394	5.63597	5.86971	7.27956	5.76847	20	MS2 targeting
M98	7.18283	8.72981	7.74036	7.41427	8.31764	7.57908	7.2524	6.9272	6.56478	20	MS2 targeting
M99	6.70169	8.0022	6.67488	6.91849	7.55303	7.69286	6.76314	6.26322	6.85425	20	MS2 targeting
M100	6.09226	7.12997	7.8911	6.08147	6.61555	7.6901	6.19728	4.76071	4.76039	20	MS2 targeting
M101	6.72942	7.49152	8.0161	6.77016	7.27119	6.14888	6.85516	6.55035	6.78922	20	MS2 targeting
M102	6.96527	4.9764	7.78293	6.96697	6.67135	6.8455	6.82133	5.8869	8.38785	20	MS2 targeting
M103	5.94062	6.63269	4.80773	5.81419	5.41886	4.88518	5.69256	5.5518	4.47356	20	MS2 targeting
M104	9.35051	10.0497	10.2125	9.29694	9.57549	10.6929	9.35021	9.63479	10.7578	20	MS2 targeting
M105	5.79219	6.36268	7.12907	5.96183	7.43092	7.23209	5.78558	5.31087	6.84495	20	MS2 targeting
M106	7.67234	8.83106	8.03156	7.58113	9.07115	8.09541	7.78812	8.30678	9.41704	20	MS2 targeting
M107	7.17816	7.12642	7.29008	6.95812	7.09396	7.58504	7.19224	7.14385	7.40203	20	MS2 targeting
M108	5.58407	6.7468	6.69371	5.51223	5.68756	7.2232	5.8291	6.35226	5.99442	20	MS2 targeting
M109	3.90011	3.9452	4.07479	3.96352	4.15956	1.98919	4.00106	3.34977	-0.400092	20	MS2 targeting
M110	2.93057	1.1134	2.83624	3.06061	1.04368	3.24921	3.06934	4.89892	4.67298	20	MS2 targeting
M111	4.96352	5.10089	5.69679	5.21679	5.84714	3.63337	5.37096	6.19066	3.25928	20	MS2 targeting
M112	4.67558	3.43922	4.18541	5.00199	6.27345	0.994338	5.16529	5.97411	3.64956	20	MS2 targeting
M113	2.22984	-2.42555	-2.17931	1.9069	5.19078	-1.84726	2.40969	-3.40579	-3.05384	20	MS2 targeting
M114	4.11349	0.643147	5.22125	3.99987	4.87012	3.26908	4.32333	0.954638	3.0715	20	MS2 targeting
M115	6.72376	7.01192	6.72786	6.66045	8.09689	3.55461	6.56491	6.64699	2.32397	20	MS2 targeting
M116	7.72518	7.52154	8.55145	7.60197	5.75899	6.42167	7.34054	7.49938	8.4435	20	MS2 targeting
M117	7.48068	7.95799	10.0754	7.45965	7.92255	8.01899	7.32274	6.73756	9.0085	20	MS2 targeting
M118	5.27427	6.62013	4.02073	5.31105	2.22573	4.06704	4.87739	2.99101	6.54029	20	MS2 targeting
M119	4.75313	5.81136	3.37069	4.91535	6.2128	5.04354	4.99294	3.65532	4.90552	20	MS2 targeting
M120	4.30541	2.80284	7.34519	4.87978	2.26039	2.21085	4.99294	8.29615	6.44851	20	MS2 targeting
M121	4.03286	4.2227	5.78592	4.71462	6.26067	9.11059	4.80745	4.18675	4.28204	20	MS2 targeting
M125	3.40018	-0.69897	4.69718	3.1824	3.50945	-0.312258	3.42121	-1.57845	3.48136	20	MS2 targeting
M126	2.20408	5.04564	3.84521	2.48215	-0.521553	7.08711	2.33589	-2.51857	-1.58691	20	MS2 targeting
M127	4.21156	0.474859	2.65883	4.41252	5.07872	4.59368	4.20913	1.85659	1.67858	20	MS2 targeting
M128	6.96463	6.52097	7.20376	6.92396	7.71564	8.13588	6.73963	7.29584	7.78705	20	MS2 targeting
M129	8.99823	9.39433	9.81812	8.96075	9.67298	10.5525	8.89332	10.037	9.56459	20	MS2 targeting
M130	7.70924	8.35909	8.46215	7.70232	9.14576	8.04804	7.475	8.25623	8.25218	20	MS2 targeting
M131	9.475	10.0212	9.33683	9.40632	9.35192	8.94097	9.23828	9.8547	10.1608	20	MS2 targeting
M132	8.9352	10.3422	9.55381	8.92919	9.46118	9.8736	8.92207	9.17609	9.85823	20	MS2 targeting
M133	7.99538	8.44524	8.88224	7.963	9.94063	9.74027	7.94527	9.2928	7.19587	20	MS2 targeting
M134	6.02274	8.01232	7.41933	6.04045	7.71017	7.88538	6.04277	5.81682	6.43618	20	MS2 targeting
M135	5.61291	6.25474	5.85963	5.64529	7.51226	2.69501	5.21888	5.37916	3.48136	20	MS2 targeting
M136	5.74011	6.02452	5.96597	5.65146	7.72575	7.70111	5.6341	6.1292	4.03332	20	MS2 targeting
M137	6.43031	7.0215	6.82306	6.57175	8.64725	8.97502	6.61696	7.74503	8.15229	20	MS2 targeting
M138	6.23372	6.69027	8.25337	6.28667	6.16329	7.12577	6.64778	8.30275	8.13985	20	MS2 targeting
M139	6.3751	9.71304	8.3433	6.51153	6.2282	6.57919	6.83814	6.15378	7.06807	20	MS2 targeting
M140	3.29835	3.24358	8.71465	3.59077	-0.113881	-1.28706	4.04515	0.543118	6.36916	20	MS2 targeting
M141	2.47214	5.59747	0.823923	2.86225	5.52602	-1.84726	3.06364	-1.97325	-1.58691	20	MS2 targeting
M144	-0.108768	-0.915834	2.2211	-0.0537085	4.6655	-1.28706	0.490866	-1.26881	-0.0435375	20	MS2 targeting
M145	1.19114	5.59747	-1.62559	2.42572	3.76012	4.40901	2.4799	-1.97325	7.72538	20	MS2 targeting
M146	3.9552	2.97046	7.65273	4.37256	3.40489	4.24814	4.73931	5.12453	4.83746	20	MS2 targeting
M147	4.56186	3.53863	4.89045	4.79161	5.76202	5.51221	5.1124	6.11593	5.13219	20	MS2 targeting
M148	4.47297	4.26202	7.88984	4.54332	6.08084	7.95603	4.99744	5.68365	6.44324	20	MS2 targeting
M149	3.59447	3.60129	7.25928	3.79553	3.55204	5.65119	3.95559	5.44701	6.94908	20	MS2 targeting
M150	3.90544	3.13481	4.69143	4.18856	3.4203	5.75699	4.2599	3.4054	1.2972	20	MS2 targeting
M151	7.12909	8.04227	7.45459	7.2542	8.82275	8.26146	7.41018	6.78343	8.96837	20	MS2 targeting
M152	5.95678	5.29662	5.94918	5.92885	7.53721	6.50572	6.22309	6.31353	7.07832	20	MS2 targeting
M153	5.06957	4.98818	5.65894	5.38057	4.59935	6.81203	5.59213	5.99783	6.73702	20	MS2 targeting
M154	6.18298	9.84742	5.49349	6.46727	8.59177	8.84122	6.73963	8.42118	7.21663	20	MS2 targeting
M155	8.55501	10.1179	7.71434	8.48718	6.68257	8.90492	9.81716	10.6816	7.52028	20	MS2 targeting
M156	5.08258	7.55094	5.17663	4.98953	5.54019	4.52097	5.66363	4.69078	2.09202	20	MS2 targeting
M157	7.48604	8.62187	8.16215	7.47785	9.77071	7.81701	7.79136	8.6112	9.1371	20	MS2 targeting
M158	6.38134	6.64265	7.18647	6.42933	7.17114	6.59698	6.30091	3.49018	6.71676	20	MS2 targeting
M159	4.43656	1.37486	4.19357	4.58072	2.97492	3.79286	4.536	2.38537	0.777277	20	MS2 targeting
M160	3.94486	-0.69897	2.15571	3.75684	4.34861	5.60112	4.2524	0.461482	-0.400092	20	MS2 targeting
M161	2.51468	-0.69897	2.4565	2.45017	4.00462	1.78353	2.73085	-1.97325	-6.13898	20	MS2 targeting
M163	-0.152473	2.50805	-6.13898	-0.988121	-6.13898	-0.570217	-1.06525	-1.97325	0.864037	20	MS2 targeting
M164	1.11945	-1.87772	-1.22644	1.62121	-2.04891	-6.13898	1.22199	-1.26881	-1.18733	20	MS2 targeting
M165	6.9659	7.43315	7.86129	7.02985	8.87716	6.32294	7.08511	7.81603	8.84448	20	MS2 targeting
M166	6.57635	3.61148	3.50801	6.6134	8.35571	5.02613	6.24971	7.23726	7.29582	20	MS2 targeting
M168	0.767406	-0.343804	-0.65753	1.00331	-0.113881	-1.84726	0.651586	-2.51857	-0.617989	20	MS2 targeting
M169	3.82604	3.00177	1.31805	3.88795	0.874999	4.59368	4.15115	3.90733	1.94055	20	MS2 targeting
M170	3.47389	2.93846	3.91603	3.11261	-1.49246	-0.570217	2.96305	2.09181	1.02332	20	MS2 targeting
M171	6.37847	4.5108	5.24109	6.54456	3.37356	6.88144	6.56138	8.71557	4.64262	20	MS2 targeting
M172	5.61454	7.49497	2.2211	5.8899	6.90699	2.96241	5.52833	3.93784	0.586337	20	MS2 targeting
M173	5.30388	1.42191	4.73124	5.33204	3.46556	3.98532	5.42201	6.83701	1.90006	20	MS2 targeting
M174	4.76051	6.13982	4.46049	4.79956	2.62201	7.56609	5.06323	4.43149	3.58717	20	MS2 targeting
M175	5.64119	6.12213	6.42205	5.83987	4.47205	4.4444	5.78385	5.48624	6.08751	20	MS2 targeting
M176	7.66822	8.3745	6.69803	7.78396	9.40951	9.1277	7.85114	8.33355	7.45452	20	MS2 targeting
M177	5.77114	3.01717	5.13057	5.86737	5.9167	5.25758	5.79766	7.81501	5.44875	20	MS2 targeting
M178	4.19203	1.59612	5.77235	3.955	7.51854	-0.570217	3.69651	1.72284	6.79061	20	MS2 targeting
M179	4.26237	3.39274	4.28049	4.4932	6.26494	7.89979	4.42915	4.11514	5.08781	20	MS2 targeting
M180	4.30541	2.24574	2.72794	4.86318	3.63363	5.0493	4.50477	-1.57845	6.40758	20	MS2 targeting
M182	1.27601	0.0647235	-0.914121	1.84676	-0.113881	0.994338	1.80403	-1.57845	-0.874753	20	MS2 targeting
M183	4.14542	0.382732	5.07418	4.44331	1.72797	5.2476	4.28708	2.27021	3.61245	20	MS2 targeting
M184	7.4209	4.84878	5.34374	7.2803	5.81253	6.98118	7.28095	5.62861	9.20437	20	MS2 targeting
M185	4.71412	3.34471	5.7476	4.74953	1.33138	4.9233	4.56051	5.01434	0.242128	20	MS2 targeting
M186	7.07445	6.29636	4.02988	6.83969	7.58243	7.62317	6.76884	5.71921	8.56421	20	MS2 targeting
M187	7.28364	9.70147	5.83895	7.25969	9.03031	5.49122	7.21911	8.3742	7.98332	20	MS2 targeting
M188	6.90691	7.5933	5.80736	6.97156	6.90151	9.40472	6.86052	8.28247	5.67857	20	MS2 targeting
M189	6.11778	6.74565	7.51612	5.83987	7.15971	8.85854	5.94144	7.8605	8.32089	20	MS2 targeting
M190	7.31557	7.21341	4.44689	7.01045	7.79314	8.53867	7.17846	7.4949	7.34	20	MS2 targeting
M191	7.48715	9.18268	7.85615	7.34992	9.20423	9.18439	7.37174	7.4592	7.57596	20	MS2 targeting
M192	7.08154	8.56471	9.7312	6.78305	9.2914	7.48026	6.74365	6.19382	6.48319	20	MS2 targeting
M193	1.04401	4.3498	0.546291	0.711168	2.82089	2.12623	0.385071	2.11868	2.67538	20	MS2 targeting
M194	5.08141	7.59459	3.71509	4.75772	7.24439	3.66371	5.04308	6.79076	6.12313	20	MS2 targeting
M196	4.29934	-2.42555	2.72794	3.71372	0.463678	0.264207	3.62085	-0.797542	-0.210827	20	MS2 targeting
M197	5.02244	6.77652	4.49394	4.78361	5.94627	2.91275	4.83951	4.34308	2.41299	20	MS2 targeting
M198	3.09378	0.474859	2.37266	3.3607	-2.04891	-1.28706	3.13609	-6.13898	-2.14144	20	MS2 targeting
M199	2.07738	0.0647235	-0.914121	1.53237	2.26039	-1.28706	1.41354	3.52073	0.106354	20	MS2 targeting
M200	0.984721	3.30761	0.546291	1.48581	3.07568	4.16574	1.39549	0.543118	-0.874753	20	MS2 targeting
M201	1.54587	0.720459	2.40115	1.9069	1.62533	2.25137	1.58261	-0.293683	5.7515	20	MS2 targeting
M202	1.79628	3.82782	2.05172	1.94181	1.51483	4.26802	1.51734	2.36306	1.97993	20	MS2 targeting
M203	4.99641	4.65069	1.53926	5.07196	6.29241	6.65098	4.90477	3.82812	8.75968	20	MS2 targeting
M204	6.43031	5.27756	8.88129	6.46877	6.28402	8.00647	6.25222	5.86126	8.2057	20	MS2 targeting
M205	4.05464	0.382732	4.50711	4.11653	1.04368	6.33478	4.05381	1.94935	1.62989	20	MS2 targeting
M206	2.10548	0.643147	-0.0833721	2.12514	-0.113881	2.98661	2.00787	-3.40579	1.62989	20	MS2 targeting
M207	4.27892	-0.059029	2.70527	4.15175	1.26466	2.36651	3.99508	0.374948	2.41299	20	MS2 targeting
M208	6.02519	6.91658	5.08739	6.25057	6.77537	3.75108	6.12586	8.41814	6.64507	20	MS2 targeting
M209	2.64166	-0.915834	1.81813	2.93337	4.1129	0.674976	2.94455	4.52487	3.41106	20	MS2 targeting
M210	1.62566	-3.31956	1.81813	1.95326	3.93123	-1.28706	2.13298	4.44217	2.62658	20	MS2 targeting
M211	5.89506	7.37082	6.34349	5.90693	6.06132	8.89136	6.14894	7.32282	6.86481	20	MS2 targeting
M212	6.44367	8.37972	6.86968	6.26443	7.39627	7.70203	6.05576	7.02546	8.36107	20	MS2 targeting
M213	4.48906	4.2227	6.43072	4.6977	-0.303365	-1.84726	4.36103	-0.797542	5.40239	20	MS2 targeting
M214	6.8695	8.64746	9.19681	6.89901	6.1905	9.59163	7.00962	7.5904	7.73261	20	MS2 targeting
M215	6.89018	7.96942	9.1838	6.97928	6.40707	10.5168	7.05417	9.41642	8.54259	20	MS2 targeting
M216	3.73302	3.32009	7.0693	3.44425	4.48676	-1.84726	3.71846	4.44217	-2.14144	20	MS2 targeting
M217	3.78318	1.8234	8.26746	3.92332	-0.521553	4.35426	4.42693	0.62038	6.39488	20	MS2 targeting
M218	-0.620034	0.474859	-6.13898	-0.249873	0.683948	-0.884567	-0.635996	-2.51857	-2.14144	20	MS2 targeting
M219	6.48392	6.98574	6.99062	6.5279	6.50787	6.84384	6.67095	8.13805	7.71302	20	MS2 targeting
M220	4.38016	4.62579	4.18541	4.5584	7.24871	8.05306	4.61027	6.2374	5.11902	20	MS2 targeting
M221	1.74956	2.92219	3.71509	1.5626	-1.49246	-6.13898	2.00787	-6.13898	6.87006	20	MS2 targeting
M222	4.83374	6.21855	5.78321	4.63329	7.27438	5.80542	4.89517	1.22583	5.78246	20	MS2 targeting
M223	5.28966	4.80508	8.40922	5.46301	6.06622	5.90402	5.14923	7.02812	8.70601	20	MS2 targeting
M224	4.60679	3.97705	3.25056	4.66324	7.24005	4.05565	4.19616	2.42897	7.17694	20	MS2 targeting
M225	4.6787	-2.42555	-0.65753	4.62257	7.33254	2.507	4.7411	-1.97325	4.38098	20	MS2 targeting
M226	4.4384	4.28765	5.81797	4.59907	4.30777	3.18791	4.3818	-1.01402	-0.210827	20	MS2 targeting
M227	3.50588	1.98878	1.48706	3.62698	-1.49246	2.69501	3.64014	4.1218	-0.617989	20	MS2 targeting
M228	0.539189	-6.13898	1.48706	1.30095	-6.13898	-6.13898	-0.305605	-2.51857	-6.13898	20	MS2 targeting
M229	2.13305	5.27756	3.92587	2.04176	-2.04891	-0.570217	2.50537	-3.40579	3.01574	20	MS2 targeting
M230	5.22815	2.72993	2.68224	5.34406	7.48321	2.21085	5.14653	7.40154	3.39658	20	MS2 targeting
M231	5.17057	5.59747	6.48663	4.81691	3.35765	0.0964108	5.03727	6.61077	5.65747	20	MS2 targeting
M232	6.09343	9.59435	2.4834	5.98224	5.81835	7.82458	6.45864	8.5545	8.58392	20	MS2 targeting
M233	4.48015	9.22309	1.68542	4.16659	3.241	7.555	4.29684	7.00129	3.0715	20	MS2 targeting
M234	4.21586	0.561455	2.61085	3.986	3.49497	2.57243	4.02181	6.45734	0.366216	20	MS2 targeting
M235	3.45217	5.88457	4.24949	3.30815	-0.303365	5.11115	3.54099	6.86208	1.02332	20	MS2 targeting
M236	5.04317	0.0647235	3.99292	5.13366	-1.49246	6.14351	5.34885	7.75684	3.6976	20	MS2 targeting
M239	5.4091	7.83898	0.546291	5.32985	1.95654	1.33321	5.43311	6.90999	2.05562	20	MS2 targeting
M240	7.57833	9.8106	8.51607	7.50705	8.74801	8.98181	7.44898	9.05847	9.33825	20	MS2 targeting
M241	7.31306	8.56667	6.91854	7.2617	9.54682	7.79661	7.41662	7.25251	9.71477	20	MS2 targeting
M242	0.836105	4.76914	-0.250588	1.22739	-2.04891	-6.13898	1.09353	-0.0348371	1.62989	20	MS2 targeting
M243	6.35622	5.11885	4.91535	6.3568	4.22244	5.95091	6.09543	6.91766	5.04667	20	MS2 targeting
M244	4.66775	1.32622	5.76414	4.59907	6.06377	1.33321	4.61807	5.70154	6.84761	20	MS2 targeting
M245	5.05403	2.0197	4.02073	4.76586	3.89859	4.75737	4.49421	1.32149	4.27414	20	MS2 targeting
M246	6.58636	8.02666	4.87021	6.37128	5.44546	8.17589	6.35445	4.89115	4.01448	20	MS2 targeting
M247	5.71068	5.90954	3.74874	5.45698	7.40113	5.47847	5.32163	5.50418	6.67087	20	MS2 targeting
M248	8.74564	8.88426	8.68779	8.67713	8.99054	10.1831	8.72296	9.85869	8.57108	20	MS2 targeting
M249	8.88246	8.31693	8.27806	8.83192	7.85328	8.6565	8.7464	9.30327	9.36824	20	MS2 targeting
M250	8.21725	7.18471	7.85229	7.98706	7.68407	8.29455	7.82946	8.35702	9.00044	20	MS2 targeting
M251	8.9396	8.90511	8.78221	8.80876	8.94365	9.29482	8.72544	8.10986	8.97386	20	MS2 targeting
M252	8.09977	8.00606	8.70682	7.81352	9.04374	9.47457	7.77422	8.83384	8.42623	20	MS2 targeting
M253	6.29348	5.50216	5.83895	6.11692	4.72875	6.43272	6.13064	5.82296	7.26027	20	MS2 targeting
M254	7.93058	7.78489	8.09398	7.74083	8.80268	8.8068	7.83888	7.90654	9.5656	20	MS2 targeting
M255	8.22834	7.63071	7.37782	7.98514	8.12948	7.3958	7.89034	8.03379	10.2564	20	MS2 targeting
M256	9.00026	8.61556	10.4244	8.8436	8.71168	9.05731	8.89923	8.85197	10.3162	20	MS2 targeting
M257	6.43585	8.07208	6.55637	6.57128	6.58168	5.63214	6.58197	6.64584	6.42908	20	MS2 targeting
M258	9.494	10.3861	10.8421	9.51978	8.32483	10.2597	9.50652	10.5821	10.877	20	MS2 targeting
M259	9.34837	10.3415	10.6918	9.33198	10.4301	10.7373	9.21427	10.2595	10.6559	20	MS2 targeting
M260	9.31309	10.523	9.58964	9.29757	8.99473	10.0127	9.45196	9.53153	10.2968	20	MS2 targeting
M261	5.75349	7.93232	7.65938	5.76386	7.59522	6.21184	5.81049	8.15843	5.40601	20	MS2 targeting
M262	5.22388	7.12997	5.9224	4.9937	7.55215	6.52444	4.9824	3.59917	3.48136	20	MS2 targeting
M263	3.21051	4.81393	2.58624	3.45637	3.63363	4.56182	3.30515	2.93162	2.99667	20	MS2 targeting
M264	3.38879	2.21934	6.25259	3.48427	6.23693	0.789467	3.47806	2.19644	7.32479	20	MS2 targeting
M265	3.62715	3.9452	4.82886	3.13792	2.35964	8.83623	3.51197	4.05379	3.39658	20	MS2 targeting
M266	4.85044	5.86767	5.99896	4.90359	6.42627	8.10096	5.02851	6.05635	7.82404	20	MS2 targeting
M267	3.08909	5.30919	5.47014	3.10749	6.30492	0.414504	3.20507	4.17399	4.92078	20	MS2 targeting
M268	1.27601	-1.87772	-0.0833721	1.04672	-0.303365	-0.312258	1.33994	-1.57845	-1.18733	20	MS2 targeting
M269	-0.88906	1.37486	0.983169	0.198099	-6.13898	-6.13898	-1.06525	-6.13898	-3.05384	20	MS2 targeting
M270	4.20724	3.17656	5.31033	4.32265	5.78898	4.56985	4.53394	5.03213	3.89594	20	MS2 targeting
M271	3.08909	1.16962	2.97538	3.28567	4.32425	1.72719	3.04639	3.75291	3.64956	20	MS2 targeting
M272	0.364147	-3.31956	-6.13898	0.344455	-6.13898	3.03383	0.823442	-6.13898	-6.13898	20	MS2 targeting
M273	2.50064	2.27165	4.36247	3.2902	1.95654	0.0964108	3.24594	4.99996	4.34372	20	MS2 targeting
M274	3.32648	2.39469	6.27778	3.53088	2.69984	0.0964108	4.03935	6.54665	7.44048	20	MS2 targeting
M275	2.48646	6.56749	6.1907	2.47422	-0.521553	4.33554	2.62638	-0.609351	0.864037	20	MS2 targeting
M276	1.13771	5.67234	-0.250588	0.412418	3.49497	2.03633	1.20136	-0.293683	1.23345	20	MS2 targeting
M277	4.87241	7.94244	10.1421	4.6702	7.18248	3.83346	4.86597	4.16112	4.30548	20	MS2 targeting
M278	4.79544	7.15107	5.3028	4.74294	5.03434	6.49943	4.78509	0.763502	5.20878	20	MS2 targeting
M279	5.08964	3.73771	3.71509	5.05744	7.65261	5.96011	5.25061	9.02689	5.52395	20	MS2 targeting
M280	4.90609	2.21934	6.85945	4.77557	8.13124	6.02289	4.73393	5.82092	4.59902	20	MS2 targeting
M281	5.30691	9.17154	7.18851	5.31993	2.77368	9.57077	5.39501	7.71507	5.75435	20	MS2 targeting
M282	2.47214	-0.69897	3.3268	2.41747	-1.0919	6.38799	2.42757	3.1296	3.76679	20	MS2 targeting
M283	3.52334	2.41809	3.55948	3.59444	-1.0919	6.3697	3.60915	2.27021	4.33615	20	MS2 targeting
M284	1.99965	-0.69897	-0.65753	1.7049	3.18797	-0.312258	1.67529	-1.26881	2.09202	20	MS2 targeting
M285	6.45873	8.71926	6.37255	6.2985	9.17841	6.62424	6.11349	6.836	5.5986	20	MS2 targeting
M286	3.25719	0.284317	-1.62559	3.52322	4.96248	0.994338	3.18419	0.184556	2.89732	20	MS2 targeting
M287	2.76425	1.59612	2.37266	2.52883	-2.04891	2.47314	2.67208	3.99698	0.106354	20	MS2 targeting
M288	1.49011	-0.915834	-1.62559	1.77112	-1.49246	1.25566	1.58261	-1.57845	-0.874753	20	MS2 targeting
M290	6.69554	8.19399	4.5459	6.60979	8.39864	9.84844	6.52188	5.51434	5.10573	20	MS2 targeting
M291	8.17946	7.47489	9.15873	8.08808	9.2893	8.17458	8.0349	10.2435	8.89622	20	MS2 targeting
M292	8.65644	11.1718	11.2536	8.46897	10.56	10.3221	8.22017	10.9463	10.0058	20	MS2 targeting
M293	4.65829	2.90573	5.32527	4.16412	6.65027	6.11909	4.21943	3.15579	0.106354	20	MS2 targeting
M294	1.57296	6.92783	2.50981	1.99819	-2.96659	-2.77542	1.56657	-1.01402	-1.18733	20	MS2 targeting
M295	5.83897	9.14221	7.52424	5.83058	5.38784	2.32914	5.54787	8.93702	7.53275	20	MS2 targeting
M296	6.39659	4.98818	8.80371	6.20578	6.62555	2.29078	6.05216	4.63136	2.95774	20	MS2 targeting
M297	7.11418	8.95869	9.32851	6.97015	7.37369	6.38344	6.78236	7.90702	3.76679	20	MS2 targeting
M298	6.04225	6.12568	5.53265	6.13337	3.74796	1.1737	5.60985	7.76962	0.945874	20	MS2 targeting
M299	3.23191	-3.31956	-2.17931	2.80018	4.50855	3.12388	2.38246	-0.293683	-0.210827	20	MS2 targeting
M300	4.46215	2.55101	0.644891	4.28008	0.339496	5.43516	4.21429	2.4713	0.864037	20	MS2 targeting
M301	4.12726	3.04749	2.72794	4.14177	4.31603	2.43847	4.02768	1.27445	3.24318	20	MS2 targeting
M302	5.48326	6.12923	5.70823	5.469	4.8303	8.66964	5.21503	5.86126	4.67298	20	MS2 targeting
M303	5.64199	5.66503	2.08723	5.54383	5.06897	7.67622	5.555	6.1292	6.21677	20	MS2 targeting
M304	4.70343	2.39469	0.644891	4.54521	4.54415	7.61154	4.81085	4.75215	5.81277	20	MS2 targeting
M305	2.21272	1.42191	3.03114	2.25112	2.26039	3.43658	2.48844	2.83767	-0.617989	20	MS2 targeting
M306	3.50236	1.95719	5.91254	3.60899	3.16985	-0.570217	3.53688	1.97899	5.93804	20	MS2 targeting
M307	5.62994	5.10089	7.34244	5.35813	1.91363	8.02119	5.3836	4.00421	1.67858	20	MS2 targeting
M308	6.27452	8.00895	6.88867	5.97664	6.95936	8.90848	5.99412	7.06659	4.2421	20	MS2 targeting
M309	3.87855	6.2773	2.18878	4.27553	2.11645	7.39467	4.12674	3.31533	4.72606	20	MS2 targeting
M310	4.70649	3.19022	1.90027	4.88577	5.33191	7.98861	4.87902	1.68737	5.65139	20	MS2 targeting
M311	5.2753	4.84447	1.257	4.76098	7.17341	4.3819	4.8855	6.55774	-0.400092	20	MS2 targeting
M312	3.55085	5.58718	7.37602	3.986	2.53974	-6.13898	3.50357	5.92737	0.864037	20	MS2 targeting
M313	3.49175	1.75155	3.69222	3.30815	-0.778722	4.72896	3.3759	6.01403	3.59986	20	MS2 targeting
M314	6.63376	7.61624	5.9224	6.36486	8.98666	5.82569	6.7854	8.18807	8.95638	20	MS2 targeting
M315	7.12309	7.08956	9.18303	7.06162	8.28803	9.57227	7.19941	5.57139	9.95867	20	MS2 targeting
M316	5.21853	4.9685	0.823923	4.91242	6.13321	4.20753	4.78162	4.29675	3.59986	20	MS2 targeting
M317	4.91406	4.69446	5.76962	5.07851	5.74376	4.24814	5.00935	6.1292	2.95774	20	MS2 targeting
M318	6.04588	2.07961	6.06278	5.87115	7.14355	1.94046	5.84249	7.40904	3.62492	20	MS2 targeting
M319	2.10548	-0.343804	4.38404	2.61067	-0.303365	-1.84726	2.27796	-0.609351	-2.14144	20	MS2 targeting
M320	6.23902	8.03188	6.8633	6.50132	6.93944	5.69591	6.42566	7.37322	5.1146	20	MS2 targeting
M321	6.3366	8.1999	6.31007	6.17615	1.99821	7.71748	6.34096	4.92199	5.88975	20	MS2 targeting
M322	5.08141	1.67593	5.59872	5.21084	2.64842	4.31657	5.11378	6.21578	2.44148	20	MS2 targeting
M323	3.09378	5.76877	3.45464	3.75684	8.32993	1.83776	3.93074	-1.26881	-0.400092	20	MS2 targeting
M324	1.76138	-2.42555	-0.0833721	1.60678	-2.96659	1.33321	2.12204	-1.97325	3.94652	20	MS2 targeting
M325	-0.620034	-2.42555	-0.439758	0.0776819	-2.96659	-6.13898	-0.0868313	-6.13898	4.20102	20	MS2 targeting
M326	0.511451	-0.69897	-1.62559	-0.100306	-0.113881	-1.84726	0.230742	1.0693	-2.14144	20	MS2 targeting
M327	3.83725	4.69925	1.73103	3.49215	5.26093	0.0964108	3.78929	0.62038	6.72548	20	MS2 targeting
M328	3.44119	1.95719	2.83624	3.86691	7.29647	0.0964108	3.82345	1.97899	7.39749	20	MS2 targeting
M329	3.42269	-3.31956	-2.17931	3.76985	1.45624	0.264207	3.62085	6.5857	-1.18733	20	MS2 targeting
M330	4.75461	2.72993	7.03448	4.64393	8.01298	7.81953	4.64123	2.83767	3.62492	20	MS2 targeting
M331	4.8601	3.73771	8.02757	4.8122	3.97362	8.96554	4.9672	6.99948	1.77129	20	MS2 targeting
M332	5.41566	2.39469	8.63741	5.36028	7.5425	8.76149	5.49057	6.39686	2.79061	20	MS2 targeting
M333	4.23295	2.69204	1.19326	4.43312	4.5789	6.08586	4.55442	6.46259	3.57436	20	MS2 targeting
M334	3.19315	3.33245	1.77524	2.94489	2.64842	4.57784	3.22565	5.8869	-1.18733	20	MS2 targeting
M336	5.70839	5.49668	5.1725	5.48487	5.69708	8.98219	5.91634	7.03871	0.777277	20	MS2 targeting
M337	4.90343	4.69446	8.7621	4.96145	5.88651	0.414504	5.32282	4.89892	-0.617989	20	MS2 targeting
M338	2.57622	-1.87772	7.5096	3.23964	-6.13898	4.1007	3.25097	6.72886	4.01448	20	MS2 targeting
M339	3.07021	0.284317	-1.62559	3.17263	-1.49246	-6.13898	3.05216	-6.13898	0.684964	20	MS2 targeting
M340	3.07021	-1.17116	-3.08945	3.37354	2.1538	-1.84726	3.07502	4.51984	-0.210827	20	MS2 targeting
M341	4.31145	-1.17116	4.8445	4.08042	4.36463	-1.28706	3.97091	-1.01402	-6.13898	20	MS2 targeting
M342	2.48646	-6.13898	4.79168	2.20396	-6.13898	-2.77542	2.31684	-3.40579	-6.13898	20	MS2 targeting
M343	5.53067	6.87913	3.60917	5.21679	7.94935	0.414504	5.0831	5.7345	8.51939	20	MS2 targeting
M344	4.94938	0.0647235	1.43289	4.75117	3.62035	4.35426	4.76238	7.03519	5.38416	20	MS2 targeting
M345	4.72774	-0.510485	1.93965	4.51655	4.80704	0.789467	4.45553	6.47044	4.31321	20	MS2 targeting
M346	5.32893	4.50535	3.99292	5.3592	0.0535801	7.73633	5.38589	6.8022	4.34372	20	MS2 targeting
M349	2.45039	0.643147	-2.17931	2.39245	-0.778722	3.3271	2.60298	0.893697	-0.874753	20	MS2 targeting
M350	3.66541	0.382732	3.8658	3.91456	2.69984	-1.84726	3.7257	3.59917	1.23345	20	MS2 targeting
M351	1.97954	-0.194401	2.08723	2.34106	-2.96659	2.98661	2.0197	2.83767	-2.14144	20	MS2 targeting
M353	2.78177	3.23042	-0.0833721	2.50568	4.58575	-0.884567	2.5221	-6.13898	0.586337	20	MS2 targeting
M354	3.8062	6.16251	-3.08945	3.7371	-2.04891	-0.884567	2.45397	1.65101	1.67858	20	MS2 targeting
M355	3.80334	-3.31956	-2.17931	3.74371	1.67756	-2.77542	3.73291	-0.0348371	-1.58691	20	MS2 targeting
M356	3.87311	-1.87772	1.53926	3.48821	-0.778722	4.6629	2.86151	6.17474	-2.14144	20	MS2 targeting
M357	1.59955	-3.31956	-0.250588	1.38792	-1.49246	1.0868	1.13764	-1.97325	-3.05384	20	MS2 targeting
M358	2.60275	0.178694	-3.08945	1.80943	2.29424	-0.884567	2.54685	-0.442901	-6.13898	20	MS2 targeting
M359	0.645097	-3.31956	-3.08945	1.54756	-2.96659	-6.13898	0.850195	-1.97325	-3.05384	20	MS2 targeting
M360	4.70343	3.81024	5.09613	4.74624	5.8357	3.55461	4.40229	6.21578	5.08781	20	MS2 targeting
M361	5.9223	6.41303	5.03835	6.24067	8.24432	7.57808	5.94377	5.7104	4.34372	20	MS2 targeting
M362	6.11893	5.95823	8.75142	6.13714	5.77706	9.81609	5.91793	7.18735	5.80457	20	MS2 targeting
M363	7.08478	6.24332	6.49821	6.96803	7.33763	7.31805	6.99995	7.67997	6.24735	20	MS2 targeting
M364	6.73618	9.41428	6.69083	6.6215	6.91109	8.10788	6.54407	7.2855	9.11709	20	MS2 targeting
M365	4.91273	3.54927	9.23193	4.87376	3.3088	6.15424	4.83951	7.51274	3.98574	20	MS2 targeting
M368	5.38159	6.05841	6.88867	5.39744	6.0265	6.00523	5.30359	7.69009	5.36569	20	MS2 targeting
M369	5.39588	2.88908	8.30329	5.56545	8.27643	8.31799	5.7514	5.95559	5.8663	20	MS2 targeting
M370	3.54744	5.94822	6.64392	3.66927	7.18361	3.10189	3.61696	-0.609351	-0.210827	20	MS2 targeting
M371	0.539189	1.95719	0.326233	0.683928	0.0535801	-0.884567	1.55034	-0.609351	-0.210827	20	MS2 targeting
M372	3.53372	0.793838	-2.17931	3.47636	-0.778722	-6.13898	3.19467	4.11514	0.480471	20	MS2 targeting
M374	-1.41915	-0.343804	-2.17931	-2.57951	0.578013	0.674976	-0.192075	-1.26881	-1.58691	20	MS2 targeting
M375	2.69811	0.474859	1.73103	3.17752	5.27795	-0.570217	3.52862	2.24604	5.83978	20	MS2 targeting
M376	2.68576	2.16506	-2.17931	3.01215	4.41934	4.86574	3.31958	5.34257	5.27361	20	MS2 targeting
M377	4.05464	2.90573	5.02469	4.02993	5.31552	7.87164	4.32572	4.52989	1.16675	20	MS2 targeting
M378	2.77595	-1.17116	2.97538	2.83155	-2.96659	3.80652	2.88758	0.693715	0.945874	20	MS2 targeting
M379	3.52681	4.42101	2.05172	3.88496	4.77743	-0.0935013	3.64397	5.61688	4.42445	20	MS2 targeting
M380	4.39542	6.67336	4.84968	4.83094	4.22244	6.5712	4.97937	5.43636	3.14264	20	MS2 targeting
M382	6.79776	7.84114	8.74101	7.01182	6.03903	6.63385	7.06456	6.8115	4.07028	20	MS2 targeting
M383	6.47003	8.1778	6.84397	6.36057	9.74627	6.35815	6.80476	8.55849	7.27519	20	MS2 targeting
M384	3.12157	1.95719	7.00694	3.33028	5.88928	4.31657	3.48234	0.893697	3.56143	20	MS2 targeting
M385	5.77843	9.05372	8.57235	6.12959	9.46768	5.93234	6.19597	5.06359	6.43794	20	MS2 targeting
M386	6.74625	8.49353	8.10051	6.86909	6.96067	8.00203	6.9977	8.87038	6.21677	20	MS2 targeting
M387	5.4091	5.66258	4.39824	5.39219	4.95192	6.45023	5.81728	4.75215	6.14711	20	MS2 targeting
M388	5.76748	3.33245	3.71509	6.11755	4.2911	4.72896	6.11625	3.69158	5.15388	20	MS2 targeting
M389	6.80491	6.85576	6.95503	7.02647	6.82831	6.73554	7.01295	7.00489	7.68573	20	MS2 targeting
M390	6.54334	6.17972	8.67691	6.92433	7.91509	7.79233	6.82176	7.47423	6.80301	20	MS2 targeting
M391	7.34362	8.58875	8.31597	7.51093	8.79974	8.71923	7.56733	8.45519	8.66733	20	MS2 targeting
M392	6.46507	5.49118	5.48353	6.92578	8.01425	4.04416	6.98945	6.38584	7.80223	20	MS2 targeting
M393	6.664	7.8177	7.35797	6.89938	6.89187	6.49521	6.93191	6.87199	7.09635	20	MS2 targeting
M394	8.22781	8.34085	8.1242	8.42928	8.68999	8.74118	8.42075	9.266	9.37264	20	MS2 targeting
M395	7.88588	8.93025	8.88634	8.16028	8.64028	9.66095	8.26931	8.38773	8.72388	20	MS2 targeting
M396	7.38026	8.81957	8.12687	7.54728	8.80562	8.83415	7.73998	8.72899	8.4128	20	MS2 targeting
M397	6.89991	8.34962	7.27573	6.97683	7.05006	8.81527	7.30592	8.3609	8.77271	20	MS2 targeting
M398	4.56861	3.55982	4.23373	4.64746	4.39615	3.53833	4.95185	6.70357	4.26619	20	MS2 targeting
M399	1.47583	0.0647235	1.12657	1.30095	2.19021	0.895536	2.09992	0.184556	-0.210827	20	MS2 targeting
M400	3.17559	-3.31956	-2.17931	3.11261	-1.0919	-1.84726	3.5934	-0.442901	0.242128	20	MS2 targeting
M401	4.61007	6.38659	2.72794	4.72133	6.02901	5.13841	4.79028	7.00129	5.3545	20	MS2 targeting
M402	7.17705	7.82756	7.08694	7.22231	8.96351	9.2304	7.2655	8.3749	8.87972	20	MS2 targeting
M403	5.80295	6.69027	6.38152	5.88841	6.0011	5.72138	5.83078	5.89275	3.83281	20	MS2 targeting
M404	7.78794	8.61207	9.34464	7.73317	8.74266	10.5224	7.80681	9.97081	8.65141	20	MS2 targeting
M405	8.0128	9.84877	8.77814	7.87503	9.6462	10.422	7.80381	9.45434	8.56259	20	MS2 targeting
M406	1.76138	-1.48161	-6.13898	2.24181	-1.49246	-2.77542	2.20729	-3.40579	-0.617989	20	MS2 targeting
M407	1.27601	-0.194401	-3.08945	1.16964	-2.96659	-2.77542	1.04804	-2.51857	-3.05384	20	MS2 targeting
M408	5.01628	8.78905	-0.250588	4.86469	1.26466	2.43847	4.96108	0.693715	4.4101	20	MS2 targeting
M409	4.16781	3.62159	-2.17931	3.37354	-0.303365	2.21085	3.59735	0.543118	2.35425	20	MS2 targeting
M410	2.8048	4.2227	-0.65753	3.06589	0.463678	1.89002	2.42757	2.36306	1.77129	20	MS2 targeting
M412	3.17116	8.35569	-0.65753	3.41969	2.11645	0.0964108	3.58147	3.33838	2.19602	20	MS2 targeting
M413	4.73375	2.34673	6.03577	4.93136	5.84999	0.264207	4.79545	7.20313	2.93788	20	MS2 targeting
M414	6.44092	4.83146	5.45324	6.3041	6.6953	1.78353	6.30333	7.83185	3.41106	20	MS2 targeting
M415	2.79908	-3.31956	6.78978	2.57404	-1.49246	-0.312258	2.5304	-3.40579	-6.13898	20	MS2 targeting
M417	1.32464	-3.31956	-0.914121	1.45391	-1.0919	-2.77542	1.64506	3.07575	-2.14144	20	MS2 targeting
M418	2.88265	7.03196	4.48731	3.06061	5.60568	-0.884567	3.16833	0.184556	-0.0435375	20	MS2 targeting
M419	6.15187	8.97012	10.6632	5.95187	5.06408	7.36035	5.92738	5.60742	6.21883	20	MS2 targeting
M420	8.07733	8.76245	9.97517	8.15129	10.0465	9.50631	8.14552	8.43928	10.1015	20	MS2 targeting
M421	5.83128	8.03614	6.75708	5.9682	3.2753	8.62553	6.159	6.20013	8.27858	20	MS2 targeting
M422	4.82108	4.71822	1.73103	4.98117	4.19583	3.57071	4.97786	3.97509	7.73405	20	MS2 targeting
M423	3.68727	1.92489	-3.08945	3.81763	-1.49246	0.264207	3.93387	-1.26881	3.12518	20	MS2 targeting
M424	4.7019	2.82051	3.17007	4.88427	3.48034	4.85263	4.75709	6.54169	3.01574	20	MS2 targeting
M425	2.90414	0.643147	0.546291	2.55913	0.339496	7.20139	2.8483	-0.293683	7.16737	20	MS2 targeting
M426	4.4236	5.95224	3.50801	4.82939	3.77218	2.40294	4.48783	4.00421	5.20463	20	MS2 targeting
M427	3.9187	0.930268	4.26507	4.13173	1.67756	1.33321	3.99508	5.97411	4.04265	20	MS2 targeting
M428	2.72251	1.67593	3.88611	2.27869	1.62533	4.54562	2.57117	3.76146	1.52729	20	MS2 targeting
M429	2.05833	-3.31956	-1.62559	2.88635	3.94194	4.02091	3.01717	4.59354	-2.14144	20	MS2 targeting
M430	3.79186	2.8552	0.326233	4.05407	4.19583	5.91668	4.33522	5.05666	2.99667	20	MS2 targeting
M431	5.86318	6.00147	6.48829	6.05978	4.53002	6.47611	6.30454	6.8289	7.37735	20	MS2 targeting
M433	2.06789	-2.42555	-2.17931	2.48215	-2.96659	0.264207	2.60298	4.78188	-2.14144	20	MS2 targeting
M435	1.98963	-2.42555	-0.914121	2.27869	2.4525	-0.312258	2.31684	2.38537	1.52729	20	MS2 targeting
M436	4.00578	2.95455	-0.0833721	4.3853	0.578013	2.57243	4.80403	-0.158463	-0.0435375	20	MS2 targeting
M437	7.35537	8.5745	9.74325	7.51577	7.95001	9.02335	7.48463	7.18258	6.37655	20	MS2 targeting
M438	4.582	6.88439	9.24058	4.68573	6.84696	5.28223	4.792	5.48365	3.68574	20	MS2 targeting
M439	5.30186	6.20516	5.96119	5.26124	4.27424	0.550611	5.1124	4.16112	5.05592	20	MS2 targeting
M440	8.20296	10.0209	7.89986	8.05657	8.39621	8.2903	7.93496	10.5439	9.45596	20	MS2 targeting
M441	5.99984	3.80137	6.00129	5.85369	5.52245	7.56207	5.89241	3.93784	4.46665	20	MS2 targeting
M442	4.93248	7.25054	1.68542	4.76586	3.76012	-0.570217	4.67529	4.50972	2.76829	20	MS2 targeting
M443	5.33289	4.3003	6.33797	5.16355	4.08417	1.25566	5.62832	5.1045	5.88716	20	MS2 targeting
M444	5.99796	-0.343804	7.49563	5.88617	6.4952	3.53833	5.62348	2.55239	5.05592	20	MS2 targeting
M445	3.9266	3.25661	5.06975	3.70019	5.28217	-0.884567	4.07947	1.85659	5.84779	20	MS2 targeting
M446	4.90875	3.12062	0.644891	4.85251	5.34811	-0.0935013	4.54011	-1.26881	5.36569	20	MS2 targeting
M447	4.81542	3.28234	5.22524	4.9241	2.84393	4.97865	4.91431	4.16112	4.33615	20	MS2 targeting
M450	3.92397	4.5108	2.31393	4.15919	4.20475	3.92397	4.11851	1.45403	4.39561	20	MS2 targeting
M451	4.60679	4.54308	5.52296	4.77879	5.45672	5.99333	4.75709	5.50927	6.56478	20	MS2 targeting
M452	1.88543	3.93712	-6.13898	1.54756	-2.96659	-0.312258	1.80403	-1.26881	-2.14144	20	MS2 targeting
M453	2.07738	-2.42555	1.19326	3.1529	-2.04891	-1.84726	2.89402	-2.51857	3.66172	20	MS2 targeting
M454	6.18682	6.77652	7.04918	5.99546	5.36414	6.30861	6.04711	7.74826	6.59996	20	MS2 targeting
M455	7.05687	7.07767	9.26525	6.88749	9.66997	7.8958	6.9366	6.59291	7.36532	20	MS2 targeting
M456	6.24587	5.46894	2.63504	5.96041	3.83102	6.68096	6.0016	3.10293	5.45923	20	MS2 targeting
M457	5.86112	2.87224	2.05172	5.8575	6.18375	5.3584	5.8746	5.39298	2.22909	20	MS2 targeting
M458	3.86765	2.21934	2.50981	4.19098	-0.113881	4.54562	3.89906	4.76071	1.02332	20	MS2 targeting
M459	7.4332	7.53431	8.1864	7.35398	6.50064	6.19116	7.01849	7.00038	8.8975	20	MS2 targeting
M460	6.98872	7.18386	5.4735	6.93592	6.50968	5.95705	6.77627	5.93684	5.07877	20	MS2 targeting
M461	5.56986	2.57202	7.33508	5.66458	3.76012	3.16688	5.34768	5.53693	-0.210827	20	MS2 targeting
M462	6.05792	4.61571	6.65874	6.08603	5.70654	6.50781	5.81644	6.74297	6.51034	20	MS2 targeting
M463	5.64438	2.24574	2.18878	5.55984	2.82089	1.47683	5.36169	4.49953	6.75841	20	MS2 targeting
M464	6.44184	7.01576	7.16274	6.265	7.15741	5.51637	6.25535	5.90631	6.44324	20	MS2 targeting
M465	6.58511	7.04517	7.82429	6.46327	6.55226	6.45458	6.21089	5.36239	5.91791	20	MS2 targeting
M466	7.25701	8.38715	8.70504	7.02375	5.54371	7.63852	6.75431	6.48472	9.02947	20	MS2 targeting
M467	9.59971	9.86575	10.037	9.35537	10.0415	9.84182	9.19768	9.58852	10.9866	20	MS2 targeting
M468	7.10754	6.98867	6.34898	6.94956	6.86678	9.43251	6.89585	6.78867	8.11242	20	MS2 targeting
M469	5.80224	5.64037	6.73347	5.84526	7.71408	6.72838	5.50852	7.30318	8.45621	20	MS2 targeting
M470	6.95597	5.18172	7.07704	6.92032	7.6518	7.84127	6.80775	4.10845	8.70528	20	MS2 targeting
M471	6.37414	6.20011	6.57055	6.34978	6.2628	9.09641	6.95174	6.79493	2.97734	20	MS2 targeting
M472	5.05883	3.59104	6.37794	5.00887	4.32425	0.994338	5.18382	2.14507	2.62658	20	MS2 targeting
M473	3.80334	-0.69897	2.81522	3.75357	3.78414	2.03633	3.67796	2.40733	0.480471	20	MS2 targeting
M474	3.51289	0.561455	-0.65753	3.60899	0.874999	0.0964108	3.43894	2.77147	0.106354	20	MS2 targeting
M475	2.47214	2.13714	1.43289	2.93914	0.339496	-0.312258	2.57117	4.44217	1.23345	20	MS2 targeting
M476	5.40722	4.22933	2.05172	5.65409	7.85328	7.90932	5.58517	6.36915	5.23343	20	MS2 targeting
M477	7.07148	9.94703	5.06085	6.87248	8.34111	8.01679	6.88781	7.75951	3.19379	20	MS2 targeting
M478	3.35016	1.8234	-0.439758	3.54609	3.1515	-0.570217	3.31958	0.830068	3.25928	20	MS2 targeting
M479	4.12497	6.29162	2.58624	4.03264	8.22581	6.76207	3.63245	7.10406	0.106354	20	MS2 targeting
M480	5.55635	7.32127	9.45916	5.8704	3.50945	5.19144	5.68515	7.96926	4.89009	20	MS2 targeting
M481	6.58719	2.87224	5.09177	6.36754	6.43199	7.27939	6.23646	7.49233	3.64956	20	MS2 targeting
M482	4.97879	8.88584	0.737182	4.71462	4.8475	1.66855	4.63932	7.46379	-0.617989	20	MS2 targeting
M483	2.45039	0.284317	-0.250588	2.45823	2.39126	-0.884567	2.40067	-2.51857	0.586337	20	MS2 targeting
M484	2.35997	0.0647235	-0.0833721	2.55913	1.19469	-0.312258	2.48844	-0.293683	4.81586	20	MS2 targeting
M485	5.15496	7.73918	6.11961	5.06141	5.58532	8.81991	4.99893	4.98543	2.95774	20	MS2 targeting
M486	5.30084	7.51341	5.82587	5.28523	5.72837	8.37698	5.16663	7.13647	4.62409	20	MS2 targeting
M487	5.71373	7.06476	6.50315	6.07428	7.10712	6.99168	5.66739	3.57996	4.84814	20	MS2 targeting
M488	5.27633	5.52927	3.44098	5.31882	3.52379	2.43847	5.07462	4.29675	7.16844	20	MS2 targeting
M489	0.74376	1.46748	-1.62559	0.764153	-0.778722	-6.13898	0.490866	-3.40579	-1.58691	20	MS2 targeting
M490	2.25515	-2.42555	-6.13898	2.58881	-6.13898	-6.13898	1.81765	-1.26881	-1.58691	20	MS2 targeting
M491	3.76274	1.75155	4.22579	3.55363	5.9167	5.02028	3.4521	2.93162	0.242128	20	MS2 targeting
M492	4.38399	2.88908	4.6564	4.61177	3.69826	4.9107	4.79717	5.97227	2.46942	20	MS2 targeting
M493	4.30743	4.20263	2.3436	4.47742	4.8475	1.72719	4.42915	3.1942	2.79061	20	MS2 targeting
M494	7.09999	7.36556	6.66022	7.25825	4.69747	9.29209	7.10781	8.45156	7.97238	20	MS2 targeting
M495	6.24377	5.17143	4.1354	6.45625	6.20169	6.0998	6.61062	5.96303	8.47916	20	MS2 targeting
M496	6.64936	7.09864	6.95263	6.68513	4.2827	7.90615	7.03862	6.97303	6.47804	20	MS2 targeting
M497	5.49305	6.21855	2.58624	5.65672	5.23937	4.21779	5.77078	6.98037	9.72531	20	MS2 targeting
M499	1.86365	-0.194401	-2.17931	2.25112	-2.04891	-0.312258	1.88388	0.954638	-0.617989	20	MS2 targeting
M500	3.26136	1.67593	-0.0833721	3.15786	-0.778722	3.84674	2.95074	0.543118	4.05192	20	MS2 targeting
M501	2.82184	1.85803	1.43289	2.74853	3.45063	-0.0935013	2.50537	-1.97325	3.85416	20	MS2 targeting
M502	2.56277	-0.194401	0.905742	3.59444	-1.49246	-2.77542	3.1031	1.41119	-3.05384	20	MS2 targeting
M503	2.33645	0.0647235	-0.0833721	2.57404	5.04432	-6.13898	2.57117	-0.442901	3.80018	20	MS2 targeting
M504	2.83309	2.34673	-3.08945	3.10236	-1.49246	-0.570217	2.95691	3.95285	0.242128	20	MS2 targeting
M505	4.55678	5.20208	3.52105	4.61358	4.15956	-0.884567	4.3818	6.99314	2.69918	20	MS2 targeting
M506	5.08494	3.03241	6.65579	5.28863	5.24371	0.550611	5.07745	4.63602	6.03706	20	MS2 targeting
M507	7.03115	1.75155	9.22722	7.10783	8.6896	9.36661	6.72796	8.47905	9.05764	20	MS2 targeting
M508	5.73861	6.81998	3.73761	5.69645	6.4952	8.54276	5.602	4.86757	4.4101	20	MS2 targeting
M509	8.08647	8.40519	6.47662	7.95875	9.29767	9.04548	7.76765	7.89929	9.48384	20	MS2 targeting
M510	0.813567	-2.42555	-2.17931	0.344455	-2.04891	-1.84726	-0.192075	0.0790259	-3.05384	20	MS2 targeting
M511	1.38703	-3.31956	-0.0833721	1.73175	3.35765	2.12623	1.46637	-0.442901	-6.13898	20	MS2 targeting
M512	4.86558	4.07598	3.15342	5.07982	2.11645	9.456	4.87577	3.51062	6.75699	20	MS2 targeting
M513	1.08222	-6.13898	-3.08945	1.14987	1.26466	-6.13898	1.83114	-6.13898	-1.18733	20	MS2 targeting
M514	4.76932	4.36192	6.11746	4.66672	1.45624	1.1737	4.93007	2.64775	-1.58691	20	MS2 targeting
M515	5.32296	1.1134	1.257	5.20965	0.961805	1.0868	5.18907	5.7878	-0.0435375	20	MS2 targeting
M516	5.98982	7.22174	2.81522	5.77277	1.62533	4.6629	5.82152	-1.01402	-0.0435375	20	MS2 targeting
M517	4.48906	5.25825	3.50801	4.45745	5.93022	4.4444	4.83951	7.39193	7.59432	20	MS2 targeting
M518	5.77406	9.6794	7.54992	5.50933	7.31101	6.56117	5.71729	4.87547	6.80986	20	MS2 targeting
M519	5.49216	7.23662	2.25271	5.25084	10.6648	2.25137	5.64178	8.12153	6.03238	20	MS2 targeting
M520	5.36909	10.0893	8.76758	5.24851	5.28217	6.92122	5.58019	7.4493	5.69937	20	MS2 targeting
M521	4.36086	5.98981	6.40984	4.31157	4.84179	7.05743	4.08793	4.53488	6.09426	20	MS2 targeting
M522	0.12884	3.5703	-3.08945	0.981097	-0.113881	-1.28706	0.620843	3.30366	3.91639	20	MS2 targeting
M523	2.99708	6.63518	1.53926	2.63931	8.43561	-2.77542	3.44773	-1.01402	-0.0435375	20	MS2 targeting
M526	-0.559945	-6.13898	-6.13898	0.627854	-6.13898	-6.13898	0.524474	-1.57845	-2.14144	20	MS2 targeting
M527	-1.92554	-3.31956	-2.17931	-1.27834	2.39126	1.25566	-0.138494	-6.13898	-2.14144	20	MS2 targeting
M528	3.59447	1.71423	-0.914121	4.14926	1.04368	3.66371	4.52981	4.57425	2.81259	20	MS2 targeting
M529	3.60435	6.08241	3.52105	3.81449	5.59554	4.07835	3.88619	2.51241	3.24318	20	MS2 targeting
M530	2.22984	4.43828	0.0664604	2.41747	1.19469	3.24921	2.57117	1.91909	1.2972	20	MS2 targeting
M531	0.394836	-0.510485	-0.65753	1.33637	-0.113881	0.895536	1.00106	-0.442901	-0.617989	20	MS2 targeting
M532	0.695272	1.0549	-1.22644	1.28291	0.203609	-0.312258	1.04804	-0.797542	1.35825	20	MS2 targeting
M533	1.81909	-1.17116	-2.17931	1.00331	1.33138	7.15543	0.7684	-3.40579	-0.210827	20	MS2 targeting
M534	3.81757	3.58071	0.0664604	3.95215	5.13116	-0.0935013	4.20136	8.08877	-1.18733	20	MS2 targeting
M535	3.6591	5.61022	2.28365	3.1628	-1.49246	-0.570217	3.31478	2.80495	0.106354	20	MS2 targeting
M536	5.09665	4.85308	8.41534	5.04277	7.86036	8.25025	5.02558	6.89937	3.76679	20	MS2 targeting
M537	4.70955	6.00534	0.326233	4.94002	-0.521553	8.55191	4.7659	4.97811	3.57436	20	MS2 targeting
M538	2.74651	-6.13898	-1.62559	2.68811	-2.04891	-6.13898	2.42757	-3.40579	-2.14144	20	MS2 targeting
M539	4.51549	7.22423	0.0664604	4.57703	1.72797	3.26908	4.54217	6.65619	0.480471	20	MS2 targeting
M540	5.5998	2.67272	0.905742	5.81811	9.40395	6.13271	5.55703	7.85851	9.03562	20	MS2 targeting
M541	4.29934	4.2227	-0.914121	4.60815	7.85894	2.21085	4.26488	-0.0348371	2.8766	20	MS2 targeting
M542	2.8498	1.32622	-0.0833721	3.19692	7.85186	0.0964108	2.7734	-0.797542	2.93788	20	MS2 targeting
M543	1.24266	-3.31956	-0.0833721	0.598978	-6.13898	-1.84726	1.04804	-1.97325	-3.05384	20	MS2 targeting
M544	1.50425	-1.17116	-0.0833721	2.26037	-1.49246	-0.312258	2.0197	-3.40579	2.32397	20	MS2 targeting
M545	0.566404	-1.87772	-1.22644	1.16964	-2.96659	-1.84726	1.00106	-6.13898	0.480471	20	MS2 targeting
M546	1.57296	-2.42555	-1.22644	0.981097	-0.778722	-0.570217	1.15919	-1.97325	-1.18733	20	MS2 targeting
M547	2.34433	3.21714	-0.439758	2.74194	0.203609	1.66855	2.30722	-0.0348371	3.15989	20	MS2 targeting
M548	5.08376	3.17656	2.42909	4.98256	6.10011	0.789467	5.01084	6.46914	4.85875	20	MS2 targeting
M549	3.9983	3.12062	2.89752	3.91749	5.18177	6.68096	3.58147	3.61813	-0.210827	20	MS2 targeting
M550	3.55426	3.62159	2.31393	3.55363	5.13584	5.84567	3.17364	-1.57845	2.76829	20	MS2 targeting
M551	1.87458	-0.343804	2.01532	2.07359	0.339496	5.66999	1.90954	0.693715	2.12753	20	MS2 targeting
M552	4.24983	3.50625	0.546291	3.63767	-1.49246	4.28764	3.73649	-0.158463	2.29303	20	MS2 targeting
M553	4.8601	4.42101	4.4537	4.86469	2.39126	7.69194	4.81425	4.63136	5.71987	20	MS2 targeting
M554	4.94808	5.56901	3.42719	5.06274	2.99565	1.25566	4.97786	3.51062	1.09681	20	MS2 targeting
M555	5.01752	4.11229	4.46049	4.75445	2.29424	2.08198	4.50055	7.45985	5.21704	20	MS2 targeting
M556	7.44195	9.11942	7.33323	7.40231	9.64436	7.16076	7.19909	10.0621	7.33621	20	MS2 targeting
M557	6.72188	8.62972	7.54593	6.54739	5.72216	7.06597	6.37935	7.28994	7.45889	20	MS2 targeting
M558	5.22602	5.05313	4.1354	5.2156	5.84143	8.05806	5.19299	3.06197	6.04404	20	MS2 targeting
M559	5.91173	6.73753	5.51971	5.71339	8.9818	8.54836	5.82658	5.6541	5.32421	20	MS2 targeting
M560	3.52334	1.32622	4.8024	3.23496	0.463678	0.414504	3.13609	1.97899	-2.14144	20	MS2 targeting
M561	2.66702	-1.17116	3.29679	2.41747	-1.49246	1.54361	2.46266	-0.0348371	-1.58691	20	MS2 targeting
M562	4.54315	1.92489	5.00626	4.39583	5.43412	6.39026	4.29684	5.80031	4.50765	20	MS2 targeting
M563	6.03436	8.52418	7.01733	6.1859	7.04758	4.47038	6.03332	4.73488	7.85482	20	MS2 targeting
M564	5.90375	8.40629	6.34165	6.03776	5.46788	5.01441	5.82826	7.14385	7.8953	20	MS2 targeting
M565	7.65223	6.20348	8.83146	7.49926	8.66757	8.06944	7.55873	8.278	8.98328	20	MS2 targeting
M566	8.12402	8.75328	8.05472	7.96777	7.12015	9.46653	7.86002	7.59699	9.1654	20	MS2 targeting
M567	5.99609	5.70837	7.47483	6.03776	3.67275	8.07862	6.01644	4.18038	8.18794	20	MS2 targeting
M568	3.52681	5.81356	6.34165	3.42381	1.51483	5.70688	3.57347	2.88541	7.13175	20	MS2 targeting
M569	2.50064	-0.510485	2.37266	2.27869	1.72797	1.54361	2.25812	-1.57845	4.58631	20	MS2 targeting
M570	2.23833	1.75155	1.05665	2.41747	0.203609	1.83776	2.5304	1.68737	-2.14144	20	MS2 targeting
M571	1.49011	-6.13898	-0.65753	1.22739	-2.04891	0.264207	1.69018	0.543118	-3.05384	20	MS2 targeting
M572	5.13124	4.32526	4.43316	5.14869	9.15845	7.2181	5.27919	7.47813	5.66353	20	MS2 targeting
M573	1.30861	-3.31956	-0.65753	0.840151	-2.96659	-0.884567	1.76238	5.69932	6.25339	20	MS2 targeting
M574	4.72472	5.73889	3.34158	4.95861	2.19021	9.62767	4.93632	2.75443	6.83692	20	MS2 targeting
M575	6.05492	7.62632	7.99464	5.87718	6.87659	8.45982	6.03769	8.09089	7.66927	20	MS2 targeting
M576	4.11118	6.8675	6.77216	4.32706	-0.521553	9.09259	4.36799	7.98075	3.12518	20	MS2 targeting
M578	3.59447	5.93003	-0.0833721	3.91456	0.203609	-0.312258	3.62085	8.06176	7.84152	20	MS2 targeting
M579	1.20852	-2.42555	-3.08945	0.0776819	-2.96659	5.2526	1.20136	0.763502	4.01448	20	MS2 targeting
M581	4.47117	4.22933	5.03835	4.60453	6.27769	6.43492	4.64887	1.65101	1.94055	20	MS2 targeting
M582	5.86249	6.65008	4.01152	5.9062	6.55575	6.5672	5.79594	6.83903	7.53026	20	MS2 targeting
M583	3.40018	1.5545	6.62139	3.17752	4.93592	6.5099	3.1523	3.44841	-0.874753	20	MS2 targeting
M584	2.60931	2.27165	-0.65753	2.25112	0.463678	-0.884567	1.81765	-1.26881	-3.05384	20	MS2 targeting
M585	2.37544	3.03241	2.63504	2.73532	4.53002	4.99664	2.6341	3.73565	5.69641	20	MS2 targeting
M586	2.34433	0.284317	0.983169	2.26037	3.13292	-1.28706	2.08873	-1.26881	-1.58691	20	MS2 targeting
M587	4.55848	3.07719	7.51123	4.42079	5.27371	4.55374	4.16187	-1.57845	-1.58691	20	MS2 targeting
M588	2.52165	0.930268	-1.22644	3.46839	2.9539	-0.570217	3.01717	2.3404	-0.400092	20	MS2 targeting
M589	4.48193	1.27589	3.58454	4.45342	1.77667	2.25137	4.05955	2.55239	2.46942	20	MS2 targeting
M590	5.91637	7.98663	8.95281	6.122	8.33604	3.98532	6.02527	5.53444	4.65484	20	MS2 targeting
M591	4.24563	5.30919	5.09613	4.18613	3.69826	3.69343	4.24989	-0.797542	-1.18733	20	MS2 targeting
M592	4.89003	4.00822	4.14386	4.77879	4.95721	6.63193	4.69572	1.12339	5.66051	20	MS2 targeting
M593	6.62287	6.40281	7.40709	6.4242	6.11202	7.01981	6.28996	6.90421	6.32013	20	MS2 targeting
M594	4.61007	5.93612	4.26507	4.41873	-0.521553	-1.84726	4.15919	3.2919	2.52373	20	MS2 targeting
M595	3.20186	4.1051	-1.62559	3.25823	-2.04891	-1.84726	3.3386	-1.97325	-1.58691	20	MS2 targeting
M596	0.813567	-0.343804	-6.13898	1.22739	0.578013	-0.312258	1.26239	2.70207	-1.58691	20	MS2 targeting
M597	2.81051	0.284317	-0.65753	2.74853	-1.49246	1.0868	2.93208	-0.158463	-0.874753	20	MS2 targeting
M598	6.01966	7.59523	9.13613	6.39667	3.74796	7.41488	6.09123	5.34542	5.06967	20	MS2 targeting
M599	5.2608	9.42316	5.22125	5.73843	8.54113	7.36497	5.27673	6.25719	0.480471	20	MS2 targeting
M600	4.26029	2.97046	8.00744	4.68229	8.55603	7.35919	4.66779	0.374948	1.67858	20	MS2 targeting
M601	6.38182	5.98394	9.25724	6.25809	8.60194	10.8104	6.34214	7.36623	8.34041	20	MS2 targeting
M602	5.97339	6.51827	8.2795	5.96183	7.09396	10.6575	6.08773	6.54665	7.52778	20	MS2 targeting
M603	6.4808	7.98124	8.76655	6.3158	6.84125	6.99914	6.64778	6.72231	5.87416	20	MS2 targeting
M604	12.0343	12.8664	12.7648	11.9084	13.2911	12.9333	11.9299	13.1486	13.324	20	MS2 targeting
M605	7.04482	5.74352	8.67909	6.96025	7.47954	7.56909	7.06134	9.29335	8.2577	20	MS2 targeting
M606	2.66072	5.90334	-3.08945	2.78744	5.96478	6.87172	2.28778	5.22381	5.71987	20	MS2 targeting
M608	5.59403	10.2403	5.26066	5.64705	7.05254	8.2781	5.76815	7.1722	7.49076	20	MS2 targeting
M609	4.26029	-1.48161	8.6125	4.21258	7.74271	5.56541	4.28218	6.84408	3.45365	20	MS2 targeting
M611	5.74309	9.74056	8.13802	5.79203	8.97105	9.09676	5.95691	8.54586	6.81259	20	MS2 targeting
M612	6.05252	8.24721	10.0062	5.98014	6.24777	9.09398	6.02747	5.70598	8.11132	20	MS2 targeting
M613	3.69036	2.10866	7.40181	4.11653	3.53798	-0.0935013	3.82682	5.25443	2.52373	20	MS2 targeting
M614	-0.748286	1.32622	-0.65753	0.273132	-2.96659	-1.84726	0.309969	-6.13898	-3.05384	20	MS2 targeting
M615	2.88265	4.04626	1.58965	3.31704	3.80777	4.00914	3.23075	5.95373	2.72258	20	MS2 targeting
M616	-0.964958	2.19246	-2.17931	0.309234	0.203609	-1.84726	-0.968575	5.95559	-3.05384	20	MS2 targeting
M617	1.34049	2.50805	-6.13898	1.5922	0.0535801	-1.28706	1.20136	1.01311	-6.13898	20	MS2 targeting
M619	3.89475	9.15662	6.83747	4.26637	1.04368	2.12623	4.3703	3.83624	4.86927	20	MS2 targeting
M620	0.922893	3.90436	-0.914121	0.912344	-2.96659	-2.77542	1.41354	-0.293683	2.05562	20	MS2 targeting
M621	2.42831	6.71999	-1.22644	2.05245	-2.04891	-2.77542	2.1546	-0.442901	7.78288	20	MS2 targeting
M622	2.61584	2.88908	-1.22644	2.29679	3.2753	3.43658	2.6341	-1.57845	0.777277	20	MS2 targeting
M623	3.90011	6.45323	8.41927	3.96069	6.49702	0.994338	4.2322	1.01311	1.35825	20	MS2 targeting
M624	6.16973	8.59678	3.75978	5.97383	9.12446	8.62889	5.91397	4.76071	7.44312	20	MS2 targeting
M625	4.12268	3.81024	5.27612	4.28915	4.12236	4.89161	4.2944	6.16026	4.55406	20	MS2 targeting
M627	2.79333	3.21714	-0.65753	3.00115	2.51124	4.02091	2.94455	4.79027	4.93588	20	MS2 targeting
M628	4.65829	2.97046	7.09241	4.67366	7.94336	9.22818	4.61222	4.53986	3.53523	20	MS2 targeting
M630	0.593115	1.27589	-2.17931	0.958542	3.56596	2.32914	0.620843	1.88818	-0.400092	20	MS2 targeting
M631	1.84154	5.36142	5.26841	2.31466	3.68556	3.88587	2.238	-2.51857	2.05562	20	MS2 targeting
M633	1.88543	5.33093	5.28762	2.32351	3.13292	3.88587	2.26807	-3.40579	2.12753	20	MS2 targeting
M634	3.5745	2.34673	-1.22644	3.64122	-1.49246	0.0964108	3.12517	-2.51857	-1.58691	20	MS2 targeting
M635	1.55947	-1.87772	-1.22644	1.57748	0.683948	-2.77542	1.69018	-6.13898	-6.13898	20	MS2 targeting
M636	1.97954	1.37486	-3.08945	1.88314	-2.04891	-0.884567	1.92221	-1.57845	1.23345	20	MS2 targeting
M637	3.81757	3.26953	1.58965	3.81763	-0.521553	1.47683	3.41674	-0.158463	2.38392	20	MS2 targeting
M638	3.3926	1.63658	5.27612	3.09203	-0.778722	5.91036	2.80793	2.73719	0.106354	20	MS2 targeting
M639	4.71867	4.76914	3.04925	4.59542	1.45624	6.2598	4.4402	3.66447	5.93804	20	MS2 targeting
M640	5.17057	3.61148	4.46049	5.20726	2.03871	1.94046	4.9672	6.4146	0.864037	20	MS2 targeting
M641	6.06509	4.83146	5.56763	5.46801	2.26039	5.44829	5.77253	3.28005	6.18552	20	MS2 targeting
M642	5.06122	2.29711	3.49485	4.32486	-1.0919	2.03633	4.37491	5.42564	1.97993	20	MS2 targeting
M643	5.49305	3.72839	7.67405	5.32324	3.57975	7.16871	4.86104	5.55673	5.22935	20	MS2 targeting
M644	4.41239	0.993931	-1.62559	4.25021	3.60694	3.69343	3.66295	2.68419	-0.617989	20	MS2 targeting
M645	4.83514	7.14144	5.94193	4.73633	3.56596	4.31657	4.09912	1.75746	4.72606	20	MS2 targeting
M646	3.36574	4.72761	1.90027	3.50777	0.874999	3.98532	2.44522	-1.01402	-0.874753	20	MS2 targeting
M647	4.88868	6.78217	8.44771	4.77072	3.90955	4.74323	4.37491	4.14159	2.91774	20	MS2 targeting
M648	6.21289	6.03022	6.18661	6.19918	5.71281	4.87225	5.91159	7.22494	5.74294	20	MS2 targeting
M649	6.52048	6.03022	8.64078	6.27815	5.97264	5.5329	6.00532	4.98177	7.09635	20	MS2 targeting
M650	6.0981	6.9176	4.63256	5.97172	6.6953	3.91139	5.68793	3.70937	5.16246	20	MS2 targeting
M651	3.56442	6.50057	5.0201	2.54406	-2.96659	2.47314	2.92581	2.42897	-2.14144	20	MS2 targeting
M652	6.09519	6.85469	6.70232	6.06441	7.88833	5.81559	6.27214	8.48938	6.0533	20	MS2 targeting
M653	9.58819	10.3102	10.3115	9.64755	10.8124	10.4467	9.72367	10.2792	10.737	20	MS2 targeting
M654	6.84019	6.52097	6.34349	6.7657	6.91109	5.95091	6.88377	7.27359	6.71822	20	MS2 targeting
M655	5.81009	4.20263	2.63504	5.6724	7.32949	2.88726	5.84581	5.66098	8.49113	20	MS2 targeting
M656	5.68064	6.03401	5.87494	5.58674	6.81088	5.49544	5.60985	5.40395	5.77968	20	MS2 targeting
M657	5.87343	5.51307	5.9322	5.86282	4.05485	3.01041	5.69717	0.693715	4.59268	20	MS2 targeting
M659	3.35016	1.59612	0.546291	3.5686	-0.113881	-0.884567	3.39419	1.36703	-1.58691	20	MS2 targeting
M660	4.06422	0.793838	2.70527	3.97761	1.86941	0.0964108	4.09633	3.42707	3.12518	20	MS2 targeting
M661	5.30691	6.31984	2.83624	5.54098	6.56791	9.87035	5.41418	8.2585	3.62492	20	MS2 targeting
M662	7.99193	8.47587	8.75694	7.76621	7.39627	7.80685	7.62728	9.16425	8.92046	20	MS2 targeting
M663	7.75635	7.40122	5.29902	7.56349	8.67923	8.98444	7.58635	8.24293	8.41819	20	MS2 targeting
M664	9.87106	10.5559	10.7423	9.56877	9.55665	10.2721	9.46108	10.3105	10.6643	20	MS2 targeting
M665	7.46065	9.60522	8.9612	7.54421	6.76183	8.42093	7.43109	6.47044	9.37357	20	MS2 targeting
M666	7.43435	8.53959	8.26601	7.28115	6.72352	5.99035	7.36625	6.94326	7.73405	20	MS2 targeting
M667	5.05643	5.20544	3.90612	5.24269	4.75937	6.67725	4.95493	3.45897	3.15989	20	MS2 targeting
M668	7.42555	7.26028	6.80984	7.41168	7.99187	8.17852	7.43882	7.37879	6.8818	20	MS2 targeting
M669	5.86318	7.86102	5.83373	5.84218	6.06622	6.93217	5.94144	6.09069	4.59902	20	MS2 targeting
M670	7.36412	7.2325	7.31369	7.1754	8.19254	7.27816	7.20752	7.2721	8.48558	20	MS2 targeting
M671	4.43102	5.84627	3.80313	4.49907	4.02492	8.03504	4.84949	5.04969	3.30651	20	MS2 targeting
M672	4.34916	0.993931	2.18878	4.61538	5.10756	2.60407	4.52566	6.80324	4.66091	20	MS2 targeting
M673	2.58955	-6.13898	-1.22644	3.02306	-2.04891	-1.28706	2.66457	0.28289	0.777277	20	MS2 targeting
M674	3.34231	4.50535	4.1269	3.78275	2.62201	-1.28706	3.88619	-0.0348371	2.32397	20	MS2 targeting
M675	4.9377	6.95107	3.82433	5.28975	8.21756	4.67785	4.85775	3.78682	3.88561	20	MS2 targeting
M676	1.10095	4.36794	3.11952	1.48581	-1.0919	-2.77542	1.93476	-1.01402	5.07423	20	MS2 targeting
M677	2.28002	4.74622	-1.62559	2.06306	-2.96659	-1.84726	2.22783	2.22145	-0.874753	20	MS2 targeting
M678	2.05833	-1.48161	-1.22644	1.28291	-1.0919	1.98919	2.05463	-0.158463	0.684964	20	MS2 targeting
M679	5.51154	4.11944	4.95433	5.74091	4.38048	4.21779	5.66457	4.54977	4.27414	20	MS2 targeting
M680	8.42665	7.08956	8.75763	8.39898	8.71168	10.0777	8.23436	9.22484	7.0635	20	MS2 targeting
M681	7.04452	6.19335	7.55071	7.11549	8.84968	9.47778	6.98078	6.06846	7.26825	20	MS2 targeting
M682	5.2691	4.38585	6.13453	5.51513	8.00406	10.8557	5.55093	4.10845	4.5735	20	MS2 targeting
M683	5.78641	4.3437	2.85696	5.69985	7.18022	8.13317	5.69533	7.59579	8.06686	20	MS2 targeting
M684	5.75571	3.55982	7.51449	6.08343	9.79953	6.79499	5.79164	6.18272	1.16675	20	MS2 targeting
M685	3.38497	1.0549	2.28365	3.72712	0.0535801	1.83776	3.1031	-0.0348371	2.74562	20	MS2 targeting
M686	4.83234	3.52792	3.48157	5.02253	6.11202	5.20181	4.61417	3.51062	5.05592	20	MS2 targeting
M687	0.164897	-6.13898	-6.13898	-0.476971	0.339496	-0.0935013	-1.06525	1.94935	-2.14144	20	MS2 targeting
M688	5.04801	7.0348	8.26019	5.41411	8.29901	5.79175	4.86104	5.74316	0.684964	20	MS2 targeting
M689	3.97818	-2.42555	0.644891	3.89391	4.50855	0.264207	3.89906	3.62752	-0.874753	20	MS2 targeting
M690	3.93967	-0.69897	1.81813	4.33146	4.24858	6.5732	4.62777	8.14214	6.58567	20	MS2 targeting
M691	4.71259	4.20263	-1.22644	5.02389	2.53974	-0.312258	4.95647	4.76071	5.46271	20	MS2 targeting
M692	3.91606	3.59104	4.20977	3.986	7.13423	-0.312258	4.20655	-3.40579	0.366216	20	MS2 targeting
M693	6.05912	9.06696	7.49975	5.85902	0.463678	1.1737	6.00829	4.36007	2.60155	20	MS2 targeting
M694	6.65848	4.64078	10.0074	6.40816	4.44969	6.59107	6.64731	5.59072	4.25017	20	MS2 targeting
M695	6.70361	7.61561	7.46643	6.47772	8.3527	8.28848	6.49617	5.96117	9.65519	20	MS2 targeting
M696	1.00476	-6.13898	-6.13898	0.656164	-6.13898	-6.13898	1.43137	-6.13898	-6.13898	20	MS2 targeting
M697	4.50497	0.863665	-0.65753	4.15671	5.28638	5.36303	4.2322	5.38193	2.65119	20	MS2 targeting
M698	3.77446	1.5545	-0.250588	3.47636	4.97819	5.42191	3.54099	5.29033	3.03457	20	MS2 targeting
M699	4.11349	3.53863	2.70527	4.15175	6.44899	7.41488	4.08511	4.50972	6.86349	20	MS2 targeting
M700	4.92067	6.60109	6.73766	4.85709	6.79767	7.63183	5.09433	3.57025	6.00639	20	MS2 targeting
M701	2.33645	-0.343804	0.983169	1.57748	3.89859	-2.77542	1.51734	2.62917	-2.14144	20	MS2 targeting
M702	2.95651	3.52792	3.18653	2.16509	-1.49246	7.10381	2.70909	-1.97325	7.72321	20	MS2 targeting
M704	1.51826	-1.87772	2.01532	1.6355	-2.96659	-2.77542	1.50055	5.50163	-2.14144	20	MS2 targeting
M705	-0.502259	1.5545	5.22524	-0.198275	-2.96659	-2.77542	0.0579045	-1.57845	-1.18733	20	MS2 targeting
M706	2.60275	5.32475	6.27393	2.40084	1.51483	-0.884567	2.8811	4.46852	-1.18733	20	MS2 targeting
M707	5.4653	6.79563	7.8664	5.46501	6.6021	4.06704	5.65796	8.28692	9.38094	20	MS2 targeting
M708	3.40772	6.91452	3.91603	3.73378	5.69391	0.414504	3.60129	1.72284	-0.617989	20	MS2 targeting
M709	2.51468	6.73404	0.905742	2.97891	2.48217	-0.0935013	2.78038	1.75746	-0.874753	20	MS2 targeting
M710	4.00329	-1.17116	1.53926	4.04874	5.0884	5.48698	3.46514	1.27445	4.96561	20	MS2 targeting
M713	1.57296	3.01717	1.31805	1.06795	2.67436	-2.77542	1.20136	1.17552	-2.14144	20	MS2 targeting
M716	3.45945	-1.17116	0.644891	3.63055	3.53798	0.550611	3.86339	4.67276	1.52729	20	MS2 targeting
M717	3.70268	3.06242	6.69371	3.16773	2.0781	2.72409	3.78236	5.80031	5.10573	20	MS2 targeting
M718	5.51678	3.62159	7.3286	5.42855	8.95659	4.52923	5.5335	7.44201	6.7327	20	MS2 targeting
M719	5.1783	9.42929	6.9918	4.9429	9.36566	5.20697	5.44632	9.93144	6.62192	20	MS2 targeting
M720	3.00208	-1.17116	6.10452	2.53646	-1.0919	4.39099	3.1031	-3.40579	-1.18733	20	MS2 targeting
M721	5.0755	4.89537	5.43957	4.99785	1.51483	5.69958	4.76062	7.10406	7.69981	20	MS2 targeting
M722	3.84838	3.76534	1.73103	3.7371	5.5819	3.48835	3.82007	3.82812	2.93788	20	MS2 targeting
M723	5.95421	6.31518	7.95014	5.87341	8.4633	7.18056	5.79594	8.2062	4.66091	20	MS2 targeting
M724	4.73225	7.38499	7.49066	4.55652	7.66803	7.25842	4.21172	4.78188	5.60491	20	MS2 targeting
M725	4.28097	3.75619	0.644891	3.76336	2.22573	1.25566	3.83018	5.23613	6.85557	20	MS2 targeting
M726	2.8988	4.06119	2.99421	3.5871	0.961805	-1.84726	3.07502	-3.40579	0.242128	20	MS2 targeting
M727	6.12295	6.05841	7.34152	6.17065	7.73656	1.1737	6.03405	-0.0348371	2.29303	20	MS2 targeting
M728	5.62752	4.8659	5.87494	5.53146	3.7357	5.85228	5.2176	-0.797542	6.28125	20	MS2 targeting
M729	4.75017	6.20011	6.92469	4.54521	3.87642	4.81933	4.79028	7.42461	-0.400092	20	MS2 targeting
M730	5.47341	7.48461	6.22098	5.63555	4.81872	5.59326	5.77166	7.66239	8.36293	20	MS2 targeting
M732	4.09492	-1.87772	1.31805	3.94069	-1.0919	2.03633	4.08511	3.31533	2.79061	20	MS2 targeting
M733	3.43382	4.15469	3.23482	3.3778	-1.0919	2.08198	3.66672	0.763502	-3.05384	20	MS2 targeting
M734	2.75836	-1.87772	1.97798	3.65881	1.19469	-6.13898	3.36202	0.184556	-2.14144	20	MS2 targeting
M735	5.60145	5.53464	6.34715	5.80078	7.2616	4.23809	5.87379	1.97899	4.43157	20	MS2 targeting
M736	5.54442	6.83961	6.60923	5.68619	6.01132	4.77137	5.58816	3.30366	3.80018	20	MS2 targeting
M737	6.42474	6.49233	7.48319	6.49693	7.1528	9.27623	6.44882	7.08969	6.00877	20	MS2 targeting
M738	6.15971	5.91982	7.72071	5.90914	4.81872	7.27325	6.03186	7.61244	7.82269	20	MS2 targeting
M739	5.97339	4.86164	8.24603	6.09317	3.52379	2.32914	6.3684	4.85164	6.6466	20	MS2 targeting
M740	5.5555	2.92219	8.29334	5.64794	1.86941	1.25566	5.95614	6.53422	6.49002	20	MS2 targeting
M741	3.76861	3.90436	5.35471	4.09601	4.96248	3.82005	4.56253	1.61371	0.945874	20	MS2 targeting
M742	4.89674	6.75026	4.11835	4.29366	6.11675	6.46107	4.05668	-1.01402	5.22116	20	MS2 targeting
M743	5.60883	6.88649	4.26507	5.30324	6.76636	7.33465	5.21374	2.38537	5.45225	20	MS2 targeting
M744	4.18547	2.71111	3.34158	4.30934	4.5651	2.16916	4.70491	-1.57845	0.864037	20	MS2 targeting
M746	3.81473	3.87084	-0.439758	3.52705	8.68999	-0.884567	3.66295	5.97227	1.72568	20	MS2 targeting
M747	3.75389	3.79245	-1.62559	3.60537	8.76546	-1.28706	3.66295	6.144	2.19602	20	MS2 targeting
M748	2.95136	2.88908	-0.914121	2.77458	-0.778722	-1.28706	2.62638	0.954638	2.44148	20	MS2 targeting
M749	3.66855	3.14886	-3.08945	3.83631	-1.49246	0.264207	3.58546	1.45403	3.59986	20	MS2 targeting
M750	6.98084	4.68002	6.69371	6.92941	6.81088	5.80882	6.90784	6.95822	8.39424	20	MS2 targeting
M751	4.96224	5.48288	3.62133	4.67885	-0.778722	-0.570217	4.74467	0.62038	0.106354	20	MS2 targeting
M752	6.22201	7.06383	5.3028	6.08473	9.07389	3.89869	6.05648	7.62889	2.91774	20	MS2 targeting
M753	5.83058	3.41617	6.77896	5.6032	6.83552	6.18855	6.23836	5.86126	4.38098	20	MS2 targeting
M754	7.08036	6.82218	8.34238	7.01079	10.012	9.47377	7.07664	7.75417	2.91774	20	MS2 targeting
M755	6.19119	6.90731	7.57749	6.30745	5.87537	5.16517	6.25222	9.43191	3.9265	20	MS2 targeting
M756	6.46507	5.61276	6.10019	6.7291	9.6289	8.32631	6.65349	6.35368	6.79061	20	MS2 targeting
M757	4.51199	4.28765	4.5459	4.76423	9.59514	0.550611	4.71949	3.93027	2.93788	20	MS2 targeting
M758	3.27792	-0.915834	5.53265	2.88635	-2.96659	3.53833	3.31478	-3.40579	3.49502	20	MS2 targeting
M759	2.22131	-0.915834	2.56121	2.26037	4.73493	6.84218	2.18644	-1.26881	0.366216	20	MS2 targeting
M760	1.59955	-0.69897	-3.08945	2.54406	4.69113	-1.28706	1.46637	-0.797542	-1.18733	20	MS2 targeting
M764	2.34433	1.89184	-0.914121	2.48215	-2.96659	-1.28706	2.37327	3.89961	-2.14144	20	MS2 targeting
M765	1.49011	1.27589	-1.22644	1.24613	-2.96659	-1.28706	0.876461	2.90098	-6.13898	20	MS2 targeting
M766	0.483169	-2.42555	-2.17931	0.656164	-0.778722	-1.84726	0.681689	0.543118	0.586337	20	MS2 targeting
M767	4.66303	-0.343804	6.9824	4.47544	-0.113881	8.22122	3.80647	5.13773	2.44148	20	MS2 targeting
M768	4.28916	3.36893	3.77074	4.47742	2.84393	4.43563	4.21686	6.81356	4.73184	20	MS2 targeting
M769	4.76492	3.89606	2.77224	4.53953	8.92723	4.24814	4.60438	-0.442901	-0.874753	20	MS2 targeting
M770	4.19857	3.04749	1.93965	3.99157	7.99122	0.264207	4.14035	0.62038	4.48729	20	MS2 targeting
M771	0.454321	-6.13898	5.54227	-0.198275	-6.13898	-6.13898	-0.635996	-3.40579	-6.13898	20	MS2 targeting
M773	-0.244066	-0.510485	-1.62559	-0.249873	-1.49246	-2.77542	-0.192075	-6.13898	-1.18733	20	MS2 targeting
M774	2.15114	4.16855	3.93564	2.52883	0.0535801	6.79671	2.29753	1.32149	3.66172	20	MS2 targeting
M775	4.09725	7.0536	9.3143	3.86691	4.47205	0.0964108	4.01591	5.3511	6.04868	20	MS2 targeting
M776	3.75093	6.31206	2.28365	3.57232	6.08084	5.11115	4.01591	7.05967	0.242128	20	MS2 targeting
M777	2.60931	2.63328	5.50009	2.26956	5.38392	3.48835	2.64178	5.45757	-1.58691	20	MS2 targeting
M778	2.49357	1.75155	-0.250588	2.22301	6.28822	-0.0935013	2.18644	0.954638	4.2421	20	MS2 targeting
M779	5.46981	5.09001	10.154	5.5803	3.48034	6.94612	5.49587	8.81213	6.23723	20	MS2 targeting
M780	6.47632	7.62003	10.3853	6.29119	7.87161	7.82122	6.12996	5.47588	7.47362	20	MS2 targeting
M781	4.62794	3.43922	0.983169	4.44736	5.95424	5.03196	4.1778	3.78682	5.77409	20	MS2 targeting
M782	2.98705	7.40562	4.09237	2.67434	4.15956	8.85279	2.90682	-2.51857	0.684964	20	MS2 targeting
M783	5.15047	4.56421	4.61443	5.09412	5.06408	3.26908	5.07604	6.15215	5.13655	20	MS2 targeting
M784	5.42591	4.7135	4.6623	5.35165	5.6651	8.84867	5.32402	6.28415	4.23398	20	MS2 targeting
M785	7.19078	6.38065	8.21877	7.06756	10.2431	3.84674	6.95636	8.13969	9.62465	20	MS2 targeting
M786	7.8531	8.84677	9.34005	7.60742	10.9094	9.68841	7.67296	8.84293	8.73328	20	MS2 targeting
M787	7.25099	7.73336	8.43011	7.09657	9.44196	3.55461	7.10642	8.19085	7.26725	20	MS2 targeting
M788	5.80295	5.08271	5.34006	5.52764	8.26367	9.81144	5.73803	6.66989	7.2094	20	MS2 targeting
M789	5.05523	3.76534	7.50386	5.07589	2.11645	10.0162	5.0329	7.30976	6.2773	20	MS2 targeting
M790	3.93184	3.12062	5.65007	3.85169	6.84696	2.93779	3.82345	-1.97325	5.34322	20	MS2 targeting
M791	6.63898	6.6062	7.33323	6.64861	8.59262	6.73017	6.60129	7.28846	6.83424	20	MS2 targeting
M792	6.29856	5.96619	9.12656	6.32685	8.69475	9.24741	6.46298	5.77519	9.6569	20	MS2 targeting
M793	5.64278	7.73336	8.13855	5.3592	4.41934	1.83776	5.56412	4.19939	9.3297	20	MS2 targeting
M794	3.32648	-0.510485	-0.914121	3.12785	2.1538	3.79286	3.47806	2.53254	-3.05384	20	MS2 targeting
M795	2.39834	-0.510485	3.81377	2.64639	1.95654	1.72719	2.70909	2.55239	2.62658	20	MS2 targeting
M796	2.77595	2.9862	3.79242	2.52883	2.26039	-1.28706	3.02306	2.57197	-0.210827	20	MS2 targeting
M797	1.4614	-2.42555	-3.08945	0.764153	1.91363	-6.13898	1.11575	-6.13898	-1.58691	20	MS2 targeting
M798	4.02307	2.19246	2.50981	4.35107	-0.778722	4.6629	3.95867	0.184556	-3.05384	20	MS2 targeting
M799	5.95871	7.58622	4.70291	6.06507	7.24331	6.54496	5.77341	2.45029	6.3784	20	MS2 targeting
M800	3.31047	4.28129	3.68064	3.36499	5.43032	5.2325	3.78236	1.75746	4.76039	20	MS2 targeting
M801	3.77446	1.67593	3.85555	3.88197	2.9539	4.65538	4.21172	3.3269	4.98025	20	MS2 targeting
M802	5.64518	6.79003	0.905742	5.71423	6.99195	5.3584	5.78904	4.44217	4.34372	20	MS2 targeting
M803	5.87887	7.81164	1.43289	5.74503	7.15741	3.80652	5.71274	4.9296	3.6976	20	MS2 targeting
M804	3.07021	-1.48161	0.905742	2.86225	7.83758	1.89002	2.39159	4.87153	3.27519	20	MS2 targeting
M805	7.14356	8.43166	8.73961	6.87888	7.77752	7.2181	6.81964	6.49885	9.69844	20	MS2 targeting
M806	6.85198	8.91028	8.4877	6.62598	9.9065	6.92905	6.47431	8.60705	8.58551	20	MS2 targeting
M807	6.74514	8.64188	7.0935	6.58929	5.27371	6.68836	6.58794	7.69735	4.27414	20	MS2 targeting
M808	5.2691	3.46191	7.7618	5.01435	2.8666	7.67249	5.14112	7.2929	-0.617989	20	MS2 targeting
M809	5.67596	6.37469	7.53151	5.5161	4.6328	6.93528	5.59113	4.22436	7.06464	20	MS2 targeting
M810	0.74376	0.474859	-0.250588	-0.148459	2.67436	-6.13898	0.270899	-3.40579	0.480471	20	MS2 targeting
M811	6.62327	8.52552	7.91476	6.63356	4.8813	10.6533	6.64253	5.04269	8.27166	20	MS2 targeting
M812	3.94745	4.20935	0.440453	4.2102	-0.778722	-0.0935013	3.83688	4.83552	1.23345	20	MS2 targeting
M813	5.17389	3.75619	8.1787	5.23802	6.72041	2.32914	5.29753	5.84526	7.44927	20	MS2 targeting
M814	2.97186	2.93846	1.81813	2.58144	1.39516	1.83776	3.18419	1.85659	4.38098	20	MS2 targeting
M815	1.13771	-2.42555	-0.65753	0.309234	6.49883	-2.77542	0.9276	-6.13898	-2.14144	20	MS2 targeting
M816	1.87458	0.561455	-1.62559	2.13523	-0.521553	2.86131	2.67956	2.0365	5.19211	20	MS2 targeting
M817	2.52165	1.75155	-2.17931	2.50568	6.45648	-0.884567	2.80793	1.01311	-1.58691	20	MS2 targeting
M818	2.95136	-1.48161	-1.22644	2.34106	5.38392	2.57243	2.61082	-2.51857	-0.617989	20	MS2 targeting
M819	2.47932	-6.13898	-6.13898	2.07359	3.63363	-1.84726	1.84451	-3.40579	-1.18733	20	MS2 targeting
M820	3.0844	0.0647235	0.326233	2.962	1.39516	2.54009	2.46266	-0.158463	1.8584	20	MS2 targeting
M821	4.52592	-1.48161	3.50801	4.31823	1.77667	1.25566	4.27972	5.24226	2.57607	20	MS2 targeting
M822	5.26599	0.474859	3.65721	5.04411	8.5158	4.07835	5.00192	7.44466	4.61161	20	MS2 targeting
M823	4.44758	5.03054	7.50796	4.51848	1.86941	3.57071	4.19876	2.22145	6.30082	20	MS2 targeting
M824	4.814	5.53998	-0.0833721	4.82004	1.04368	8.23139	4.89677	2.53254	5.20463	20	MS2 targeting
M825	3.8062	0.793838	7.43835	3.42381	2.29424	1.4068	3.25598	1.41119	0.366216	20	MS2 targeting
M826	5.05403	4.14771	-1.62559	5.12356	7.17	3.5052	4.95801	-1.01402	3.33717	20	MS2 targeting
M827	5.87002	4.91606	2.08723	5.7606	7.47031	3.69343	5.64942	1.53608	4.61161	20	MS2 targeting
M828	7.42625	6.37169	6.11316	7.10366	7.76173	10.0564	7.40877	9.24194	10.2714	20	MS2 targeting
M829	9.00143	9.90703	8.61668	8.74202	8.8789	10.2315	8.76057	10.5086	9.45662	20	MS2 targeting
M830	7.89748	8.41504	8.43313	7.64189	7.2765	9.12293	7.62753	8.41136	7.12408	20	MS2 targeting
M831	6.48927	5.99759	6.95143	6.51249	7.98606	5.96011	6.2154	6.97395	6.78367	20	MS2 targeting
M832	1.70127	1.75155	-0.914121	1.60678	2.69984	0.264207	1.90954	3.01981	1.52729	20	MS2 targeting
M833	4.61984	4.92833	4.49394	4.64217	5.97786	0.895536	4.86433	4.56451	10.3499	20	MS2 targeting
M834	4.87786	3.66134	7.60912	4.83714	1.57114	9.0379	5.07887	6.81561	6.8516	20	MS2 targeting
M835	3.07021	0.993931	-3.08945	3.2992	3.2753	5.91982	3.74008	2.29399	2.72258	20	MS2 targeting
M836	3.3024	2.29711	5.68814	3.6234	-1.49246	-1.28706	3.4301	6.10252	3.95643	20	MS2 targeting
M838	1.35617	-1.48161	-2.17931	1.64965	-2.04891	-1.84726	1.58261	-3.40579	-1.58691	20	MS2 targeting
M839	4.4384	2.0197	6.54045	4.2102	0.339496	1.72719	4.42025	5.13115	2.01827	20	MS2 targeting
M840	4.83094	5.58718	7.59301	5.09412	4.5371	1.0868	4.88873	1.72284	6.70946	20	MS2 targeting
M841	2.6544	5.11528	-0.914121	2.72867	-1.0919	-1.84726	2.47131	0.28289	6.31436	20	MS2 targeting
M842	6.07815	9.10687	8.94708	5.89807	8.19254	4.75737	5.99637	7.26234	4.66696	20	MS2 targeting
M843	6.55443	8.07438	8.46469	6.41853	8.01108	5.17046	6.44004	8.62767	5.72277	20	MS2 targeting
M844	7.11936	7.75993	10.371	7.10237	7.88555	6.95841	6.94903	7.56559	7.04389	20	MS2 targeting
M845	3.24039	1.27589	4.53309	3.63055	1.26466	2.29078	3.19988	4.34876	0.242128	20	MS2 targeting
M846	5.94969	2.95455	8.48563	5.68876	2.4525	4.60935	6.012	7.29142	2.29303	20	MS2 targeting
M847	4.75313	9.24288	8.80738	4.6977	1.62533	4.95431	4.4424	5.34542	8.35874	20	MS2 targeting
M848	2.09617	-0.059029	-2.17931	2.51344	-0.521553	4.13358	2.5304	-1.26881	1.2972	20	MS2 targeting
M850	3.65277	-2.42555	-0.914121	3.28114	0.0535801	3.4713	4.37491	-1.26881	7.04389	20	MS2 targeting
M851	5.30792	3.19022	5.81532	5.32985	8.81949	0.264207	5.93443	4.5791	7.13393	20	MS2 targeting
M852	3.50939	5.18854	-3.08945	3.7371	0.0535801	-1.84726	3.49511	-1.97325	0.242128	20	MS2 targeting
M853	3.84838	5.18854	6.00129	3.96635	3.46556	-0.570217	3.92131	-1.57845	4.15875	20	MS2 targeting
M854	2.62234	-0.915834	4.44004	3.16773	-1.0919	4.91702	2.56311	0.893697	-0.617989	20	MS2 targeting
M856	2.4134	-6.13898	-3.08945	2.70176	-2.04891	-2.77542	2.39159	-1.57845	-6.13898	20	MS2 targeting
M858	6.1045	6.88229	4.62654	6.14964	8.1841	7.48345	6.0729	6.31498	5.99202	20	MS2 targeting
M859	4.35307	2.67272	4.65048	4.35107	3.78414	0.264207	4.0306	3.45897	8.6556	20	MS2 targeting
M860	3.4882	3.96916	-3.08945	3.31704	-1.0919	5.22743	2.95691	3.41628	2.49683	20	MS2 targeting
M861	4.18107	3.55982	1.43289	4.08564	1.91363	9.36372	3.7257	3.41628	4.41729	20	MS2 targeting
M862	3.95777	5.80915	2.70527	3.88795	7.29333	5.46991	3.84022	4.74354	6.2614	20	MS2 targeting
M863	4.41239	6.42463	2.3436	4.11653	7.30687	6.81033	4.04225	3.55065	6.13626	20	MS2 targeting
M864	2.81051	1.98878	2.2211	2.97891	6.08084	6.82718	3.14692	2.19644	1.47312	20	MS2 targeting
M865	0.943798	-1.48161	-1.62559	1.28291	6.03403	-6.13898	1.04804	-1.26881	-0.0435375	20	MS2 targeting
M866	2.52858	6.42608	1.58965	2.1749	-2.04891	-2.77542	2.4799	4.9296	3.45365	20	MS2 targeting
M867	4.88868	7.02341	6.60004	4.69429	5.6191	3.57071	4.66026	9.44574	3.56143	20	MS2 targeting
M868	2.10548	2.95455	1.81813	1.87111	-6.13898	-2.77542	1.69018	-6.13898	-6.13898	20	MS2 targeting
M869	3.87311	5.05313	1.37661	4.19098	0.203609	2.57243	4.23981	3.65532	1.09681	20	MS2 targeting
M870	2.34433	-1.17116	-0.914121	2.18465	-2.96659	-6.13898	2.38246	-1.97325	-2.14144	20	MS2 targeting
M871	3.66855	2.82051	2.05172	3.89391	1.57114	3.43658	3.50357	1.85659	6.54194	20	MS2 targeting
M872	1.40221	-1.87772	-3.08945	1.6355	-1.0919	-0.570217	1.30169	1.27445	2.01827	20	MS2 targeting
M873	0.813567	2.80284	1.05665	1.14987	-1.49246	6.93528	1.02474	-3.40579	-2.14144	20	MS2 targeting
M874	3.3185	-1.87772	2.15571	3.24897	-0.778722	0.674976	3.22053	0.184556	-0.617989	20	MS2 targeting
M875	4.33933	4.17543	5.9731	4.55464	5.11231	8.22441	4.5866	-1.01402	2.57607	20	MS2 targeting
M876	6.18133	7.70094	9.54545	5.87642	5.13116	4.13358	6.00309	7.73584	9.46337	20	MS2 targeting
M878	6.91884	7.21006	7.72776	6.72577	6.46022	5.80882	6.83563	8.32708	4.90552	20	MS2 targeting
M879	6.23849	5.3493	6.81382	6.14466	9.1639	8.63561	5.83581	7.2855	5.46271	20	MS2 targeting
M880	5.91438	9.24493	6.73067	5.87341	8.05246	7.58206	5.762	7.892	4.15875	20	MS2 targeting
M881	3.64002	-1.48161	3.82433	3.85169	-0.521553	5.80542	4.03352	-0.158463	7.31327	20	MS2 targeting
M882	0.670403	1.51165	-2.17931	0.539432	-2.04891	-1.84726	0.230742	5.10786	-6.13898	20	MS2 targeting
M883	1.54587	-6.13898	-0.914121	2.32351	-2.96659	5.86212	1.90954	-2.51857	1.67858	20	MS2 targeting
M884	3.54402	4.85736	-1.22644	3.48821	4.05485	0.0964108	4.24486	5.17662	1.09681	20	MS2 targeting
M886	2.22984	3.16278	0.0664604	2.23244	-2.04891	-1.84726	1.56657	-6.13898	-6.13898	20	MS2 targeting
M888	2.169	-2.42555	-2.17931	1.33637	-2.04891	4.83274	1.98391	-1.26881	0.366216	20	MS2 targeting
M889	5.20236	6.28527	2.68224	5.1697	5.31139	4.99664	5.34768	5.13444	8.49198	20	MS2 targeting
M890	4.79112	5.79581	6.70232	4.73301	6.84125	4.22797	4.82103	4.37129	6.80849	20	MS2 targeting
M891	4.69575	4.48334	6.25064	4.84945	7.21487	8.45603	4.82946	7.3493	4.94087	20	MS2 targeting
M892	2.39074	-6.13898	4.02073	2.46625	6.12148	7.98936	2.31684	-1.26881	2.69918	20	MS2 targeting
M893	1.41724	3.17656	-6.13898	1.60678	-2.04891	-1.28706	1.32094	-3.40579	-1.18733	20	MS2 targeting
M894	4.12268	3.66134	0.644891	4.2409	8.09028	6.87982	3.99508	2.3404	6.51538	20	MS2 targeting
M895	5.83478	7.21758	3.54678	5.77922	10.2796	7.60765	5.77951	7.85402	6.93537	20	MS2 targeting
M896	6.67185	8.45835	9.99019	6.46227	7.77678	8.4544	6.38793	5.64026	9.67913	20	MS2 targeting
M897	4.23507	6.52502	6.49491	4.51268	1.99821	1.47683	4.81256	4.56939	0.106354	20	MS2 targeting
M898	4.16781	4.52703	2.25271	4.62078	0.203609	2.69501	5.12341	4.52487	3.19379	20	MS2 targeting
M899	4.60679	7.37007	7.66453	4.91388	0.578013	8.14128	5.05031	0.830068	0.106354	20	MS2 targeting
M900	5.5538	5.89503	6.46991	5.38375	7.83399	3.80652	5.5001	4.53986	2.55014	20	MS2 targeting
M901	3.20186	4.92833	-2.17931	3.55363	6.05886	6.6791	3.1031	7.09224	6.07847	20	MS2 targeting
M902	4.44575	-0.510485	-0.0833721	4.34021	7.09756	-0.312258	4.56859	2.51241	-0.874753	20	MS2 targeting
M904	4.814	4.20263	3.03114	4.80747	5.51888	1.0868	5.12889	7.34859	0.242128	20	MS2 targeting
M905	6.1736	6.00147	10.496	6.2827	5.26947	7.2232	6.43729	6.63889	7.99838	20	MS2 targeting
M906	7.06225	6.31518	9.60312	6.89679	10.1344	9.04476	6.98569	7.25327	7.65184	20	MS2 targeting
M907	7.47014	9.56238	9.12015	7.30983	10.6823	10.4637	7.34436	8.58162	9.04754	20	MS2 targeting
M908	8.45036	10.103	9.38108	8.26624	10.972	11.3519	8.39472	10.0788	9.21059	20	MS2 targeting
M909	7.80839	8.30404	9.85737	7.57859	9.39252	10.2728	7.70262	8.23374	8.45315	20	MS2 targeting
M910	7.6079	9.52651	7.93864	7.46216	9.31838	9.45492	7.47875	9.16908	9.59047	20	MS2 targeting
M911	5.71904	7.73802	3.18653	5.54572	5.70024	7.62027	5.43311	7.88957	8.06857	20	MS2 targeting
M912	5.47161	2.32213	6.00129	5.31772	5.91126	6.35583	5.31684	4.85963	3.36718	20	MS2 targeting
M913	6.31068	5.2088	5.05638	6.27473	5.41502	5.95398	6.40608	5.50927	4.06113	20	MS2 targeting
M914	4.56861	4.30658	2.95631	4.51268	3.57975	2.21085	4.74467	3.61813	1.47312	20	MS2 targeting
M915	4.12726	5.05686	3.82433	3.78275	3.57975	4.47038	4.04515	-1.01402	0.242128	20	MS2 targeting
M916	3.27792	-1.87772	5.93464	3.0553	-1.0919	0.994338	3.33387	-0.442901	2.83425	20	MS2 targeting
M918	4.71867	6.65008	7.48817	4.64922	6.31938	6.09424	4.39094	5.18619	2.29303	20	MS2 targeting
M919	5.5298	7.32591	4.92028	5.29539	5.59554	6.62231	5.37672	5.64026	5.20463	20	MS2 targeting
M920	5.5298	4.73695	6.4496	5.27842	7.90485	9.67475	5.45615	5.6495	5.38416	20	MS2 targeting
M921	3.31449	5.86342	7.03562	3.48032	5.57503	-1.84726	3.32436	4.51479	-1.58691	20	MS2 targeting
M922	4.92986	5.15412	7.06374	4.77072	4.19583	7.92975	4.72312	5.80859	2.60155	20	MS2 targeting
M923	5.34178	4.59019	1.73103	4.96852	5.59214	5.99333	5.29996	4.73488	3.24318	20	MS2 targeting
M924	5.0755	4.24903	4.97816	4.66498	7.57471	1.1737	4.64123	3.4054	3.21044	20	MS2 targeting
M925	5.49659	6.28845	6.20086	5.469	4.7472	6.12182	5.40293	7.0219	4.53435	20	MS2 targeting
M926	3.78608	-0.059029	4.40529	3.89984	-0.778722	0.895536	3.60915	5.11789	2.01827	20	MS2 targeting
M927	3.00208	6.85469	7.63784	2.93914	-0.303365	-0.884567	3.27585	3.89961	-1.58691	20	MS2 targeting
M928	3.17559	6.98867	-3.08945	2.46625	1.26466	0.414504	3.34801	3.43778	-6.13898	20	MS2 targeting
M929	5.55465	2.13714	7.26608	5.55984	5.5117	0.0964108	5.34768	6.87001	5.12781	20	MS2 targeting
M930	6.14003	7.37531	3.45464	5.91208	5.34811	4.22797	6.09823	7.39262	7.19274	20	MS2 targeting
M931	5.45533	8.067	4.51365	5.74421	7.96913	4.89161	5.78472	1.45403	6.90756	20	MS2 targeting
M932	4.27067	-0.69897	0.983169	4.51075	4.80117	5.17046	4.40003	4.65451	3.36718	20	MS2 targeting
M933	4.99516	1.71423	4.97816	4.58072	1.39516	8.83707	4.7764	2.71974	4.32854	20	MS2 targeting
M934	2.26349	-3.31956	-2.17931	2.30575	-2.04891	-6.13898	3.1523	4.9105	2.44148	20	MS2 targeting
M936	-0.446792	-1.87772	-1.62559	-0.148459	-6.13898	-2.77542	0.0112542	-6.13898	-0.400092	20	MS2 targeting
M937	3.87039	0.643147	-1.62559	3.96918	6.14253	4.11174	3.39419	3.034	5.29718	20	MS2 targeting
M938	4.32546	3.98491	0.546291	4.33802	1.95654	3.3271	3.69651	2.83767	6.40938	20	MS2 targeting
M939	1.74956	-3.31956	2.72794	2.1552	-1.49246	-6.13898	2.78038	-6.13898	-6.13898	20	MS2 targeting
M940	2.49357	-6.13898	-3.08945	2.81908	-6.13898	-2.77542	2.31684	-2.51857	1.02332	20	MS2 targeting
M941	6.91752	8.46293	6.01288	6.80732	3.34155	2.08198	6.46514	5.82908	6.58248	20	MS2 targeting
M942	6.49901	5.39423	6.03122	5.91501	6.29241	5.89126	6.01939	7.82473	5.78524	20	MS2 targeting
M943	6.49813	5.61276	4.2573	6.2307	6.88911	1.83776	6.274	4.35443	8.88686	20	MS2 targeting
M944	6.13265	2.88908	6.38687	5.6032	5.1405	8.85484	5.74428	9.80734	3.19379	20	MS2 targeting
M945	2.35997	-6.13898	-1.62559	2.45017	-0.113881	-2.77542	2.38246	-0.442901	5.0513	20	MS2 targeting
M946	4.18766	2.46377	-1.22644	4.04607	5.93291	5.17573	3.60129	5.6472	5.63914	20	MS2 targeting
M947	2.69811	0.284317	-0.914121	2.74853	0.0535801	4.27786	2.81474	0.763502	5.61432	20	MS2 targeting
M948	7.10057	5.55325	7.66453	7.08718	7.74653	8.81358	7.06955	6.48859	6.76829	20	MS2 targeting
M949	6.47363	4.67517	9.49554	6.19557	5.29058	5.35376	6.2096	5.1045	4.02393	20	MS2 targeting
M950	2.22131	-0.510485	-0.65753	2.43391	-1.49246	4.58578	2.17591	0.184556	-0.617989	20	MS2 targeting
M951	1.32464	-0.194401	-6.13898	1.16964	0.203609	-2.77542	1.28217	-2.51857	-3.05384	20	MS2 targeting
M952	0.483169	-6.13898	-6.13898	0.764153	-6.13898	-2.77542	1.26239	-6.13898	-1.58691	20	MS2 targeting
M953	2.11473	-1.48161	3.49485	1.96463	0.961805	-2.77542	2.86807	-1.57845	2.76829	20	MS2 targeting
M954	4.55678	3.83653	5.24895	4.07781	1.67756	4.82605	4.4857	-0.293683	6.44324	20	MS2 targeting
M955	2.28822	2.46377	0.546291	2.04176	-2.96659	-0.312258	2.46266	-3.40579	0.586337	20	MS2 targeting
M956	4.38972	6.18485	8.56016	4.12921	0.683948	3.03383	4.14846	5.94625	6.46248	20	MS2 targeting
M957	4.24773	9.40918	2.01532	4.13676	10.9245	4.34493	4.15919	5.49395	7.51861	20	MS2 targeting
M958	1.6765	-1.87772	-2.17931	2.61788	-1.49246	-0.312258	2.04308	-2.51857	-3.05384	20	MS2 targeting
M960	3.45582	5.40305	-2.17931	4.25947	2.03871	0.264207	3.49511	2.24604	-0.617989	20	MS2 targeting
M961	3.38497	4.4666	0.0664604	3.02848	6.33165	0.895536	2.8811	4.8436	6.25138	20	MS2 targeting
M962	-1.31616	1.5545	-2.17931	-1.51035	-2.04891	2.29078	-1.53364	-3.40579	2.81259	20	MS2 targeting
M963	5.01134	5.51578	5.7614	5.0374	6.63714	0.895536	4.95493	2.64775	7.38379	20	MS2 targeting
M964	4.72774	3.01717	4.5712	4.46747	4.08417	5.07774	4.51943	4.88333	7.01574	20	MS2 targeting
M965	4.46757	5.80693	3.49485	4.31157	6.07599	4.60154	4.23981	3.11632	2.85558	20	MS2 targeting
M966	3.20186	3.98491	1.05665	3.27658	4.25718	4.02091	2.89402	3.2919	2.74562	20	MS2 targeting
M967	1.84154	-6.13898	-1.62559	1.35376	3.16985	2.91275	1.53394	0.693715	2.79061	20	MS2 targeting
M968	4.68026	5.35234	4.01152	4.58809	5.93559	1.98919	4.56657	5.59551	3.778	20	MS2 targeting
M969	2.28002	-2.42555	-2.17931	2.84391	0.683948	2.507	2.58716	0.830068	5.7515	20	MS2 targeting
M970	0.267959	-3.31956	0.0664604	-0.100306	2.67436	-6.13898	0.490866	-3.40579	-6.13898	20	MS2 targeting
M971	1.08222	-6.13898	-3.08945	0.888679	-6.13898	0.674976	1.13764	-6.13898	0.586337	20	MS2 targeting
M972	1.32464	-2.42555	-6.13898	0.840151	-6.13898	0.994338	1.32094	-3.40579	-0.210827	20	MS2 targeting
M976	1.40221	0.284317	-2.17931	2.28777	2.0781	5.37225	2.44522	0.461482	0.684964	20	MS2 targeting
M977	3.41148	8.69072	5.14328	3.16773	1.39516	3.97326	3.38964	-1.26881	2.26141	20	MS2 targeting
M978	5.3319	5.74121	2.01532	5.80947	4.98338	5.72498	5.47561	2.77147	6.74132	20	MS2 targeting
M979	2.5829	-0.059029	-3.08945	2.07359	-2.96659	-1.84726	1.70491	1.8243	-2.14144	20	MS2 targeting
M980	1.40221	-2.42555	3.20281	2.1552	4.2911	2.40294	1.89677	2.70207	2.62658	20	MS2 targeting
M982	6.52048	7.34053	6.87223	6.57638	9.2034	9.37265	6.49405	6.28711	4.70271	20	MS2 targeting
M983	5.04438	6.0359	5.18074	5.08112	5.75899	4.14438	5.22528	6.64352	7.42361	20	MS2 targeting
M985	5.55635	6.15557	3.13657	5.6698	6.28822	5.15452	5.57519	2.94669	7.48307	20	MS2 targeting
M986	0.880152	-3.31956	-3.08945	1.02518	3.3088	-0.312258	-0.563587	-6.13898	3.38196	20	MS2 targeting
M987	1.27601	-1.87772	-6.13898	1.5922	-1.49246	-2.77542	2.06608	-6.13898	-3.05384	20	MS2 targeting
M988	2.32852	-0.510485	1.257	1.98709	-2.96659	-0.884567	1.51734	6.91191	-6.13898	20	MS2 targeting
M989	1.29241	-1.87772	0.0664604	1.48581	2.03871	-0.884567	2.1546	2.31738	0.684964	20	MS2 targeting
M990	5.78134	8.47866	5.9395	5.53718	5.87816	3.10189	5.70177	8.20698	4.18426	20	MS2 targeting
M991	3.58452	4.2227	0.546291	3.71035	5.11705	1.1737	3.9276	4.59354	4.90552	20	MS2 targeting
M992	4.90742	2.93846	5.50993	5.39008	4.17781	1.25566	5.21374	4.08138	5.3694	20	MS2 targeting
M993	5.84384	6.04533	6.66463	6.5279	6.96856	5.96924	6.19336	3.85235	6.70359	20	MS2 targeting
M994	5.19693	5.18854	6.03804	5.56451	2.0781	5.6474	5.42423	3.54074	3.49502	20	MS2 targeting
M995	7.15901	5.81577	7.78968	7.29387	5.33191	6.83886	7.30834	7.46706	8.01625	20	MS2 targeting
M996	5.38923	4.55368	5.36559	5.48783	3.90955	1.0868	5.35002	7.25856	4.79944	20	MS2 targeting
M997	4.27067	-0.510485	1.43289	4.39162	4.09381	-0.0935013	3.90864	7.77121	3.82201	20	MS2 targeting
M1000	3.36186	1.1134	0.546291	3.59444	0.961805	0.994338	3.56945	4.713	1.90006	20	MS2 targeting
M1001	2.39834	-0.059029	-0.250588	2.05245	1.62533	1.78353	2.05463	4.713	1.52729	20	MS2 targeting
M1002	3.00705	1.59612	3.03114	3.35207	3.48034	0.895536	3.18944	3.01981	1.02332	20	MS2 targeting
M1003	2.90947	-1.87772	-3.08945	3.12279	-6.13898	-1.28706	2.9195	1.91909	-1.18733	20	MS2 targeting
M1004	1.94885	3.23042	-0.65753	2.60342	-2.96659	-6.13898	2.07745	-6.13898	-1.18733	20	MS2 targeting
M1005	4.64878	6.30423	3.39922	4.68229	4.24858	2.08198	4.7411	0.954638	1.16675	20	MS2 targeting
M1006	3.38115	5.73423	-1.22644	3.24897	6.38564	-1.28706	3.65159	2.31738	4.48045	20	MS2 targeting
M1007	3.54402	2.10866	6.6138	3.45637	3.62035	-0.570217	3.32436	-1.01402	-2.14144	20	MS2 targeting
M1008	7.37906	7.24073	6.66316	7.42305	7.77153	7.24343	7.36654	9.40179	7.98393	20	MS2 targeting
M1009	7.57352	8.39159	8.26456	7.4473	7.25839	9.06869	7.34319	9.90635	6.68732	20	MS2 targeting
M1010	3.36574	-3.31956	1.257	4.54899	-1.0919	-0.884567	3.84356	4.05379	4.14148	20	MS2 targeting
M1011	-0.197543	1.8234	-1.22644	-0.198275	-2.04891	-2.77542	-0.192075	1.49564	-1.18733	20	MS2 targeting
M1012	3.46669	3.29503	1.81813	3.47636	4.8645	5.59719	3.26097	4.06765	1.16675	20	MS2 targeting
M1013	3.78028	1.95719	-1.62559	3.21131	-2.96659	-6.13898	3.8502	3.41628	-1.58691	20	MS2 targeting
M1014	4.01321	4.9764	-0.914121	4.12921	-2.96659	-0.0935013	4.37491	-1.01402	-0.617989	20	MS2 targeting
M1015	4.08083	5.03054	-1.22644	4.10887	-2.96659	-0.0935013	4.44898	-1.01402	-0.617989	20	MS2 targeting
M1016	3.97056	4.28765	2.4834	4.2409	-0.303365	-0.0935013	4.34466	0.954638	6.72982	20	MS2 targeting
M1019	1.32464	-6.13898	3.37069	2.32351	-2.96659	1.0868	1.94721	-3.40579	-1.58691	20	MS2 targeting
M1020	5.45259	5.27436	5.69679	5.72262	4.26574	6.3697	5.40406	-1.01402	5.09231	20	MS2 targeting
M1021	4.30136	5.29662	5.1725	4.71294	-0.303365	6.49099	4.07381	-2.51857	-0.874753	20	MS2 targeting
M1022	5.03345	4.95657	0.202186	4.95006	7.745	3.12388	5.05894	6.72886	9.12287	20	MS2 targeting
M1023	6.37607	7.59394	6.51461	6.29231	6.45648	6.75328	6.32316	6.95822	4.83209	20	MS2 targeting
M1024	4.69575	10.5181	1.37661	5.17216	0.782634	1.94046	4.87414	8.12526	7.7717	20	MS2 targeting
M1025	3.46669	8.51505	-1.22644	3.24897	-6.13898	-0.570217	3.43453	2.93162	-3.05384	20	MS2 targeting
M1030	4.2393	-0.510485	0.202186	4.37469	-0.521553	-0.0935013	4.13764	2.0365	2.01827	20	MS2 targeting
M1032	2.43571	3.76534	2.40115	2.63931	8.73729	-0.884567	2.37327	-0.442901	0.864037	20	MS2 targeting
M1033	1.35617	-1.48161	-2.17931	1.87111	-2.04891	-1.84726	1.61417	-2.51857	-2.14144	20	MS2 targeting
M1034	4.2748	5.25175	3.8658	4.06467	2.0781	5.01441	4.24989	4.48411	1.8584	20	MS2 targeting
M1035	3.03167	3.70003	4.08361	2.50568	-0.778722	5.04354	2.51376	-0.0348371	5.32421	20	MS2 targeting
M1036	0.12884	-6.13898	-3.08945	-0.303385	2.39126	-2.77542	0.103093	1.0693	-6.13898	20	MS2 targeting
M1037	4.43656	5.26794	3.44098	4.1837	4.87012	4.8394	4.32572	5.22998	5.10127	20	MS2 targeting
M1038	3.4703	2.92219	6.1451	3.59809	4.5651	-0.312258	3.18419	-1.97325	3.97604	20	MS2 targeting
M1039	4.92724	1.0549	0.823923	4.88875	3.96314	0.0964108	4.78855	2.93162	2.05562	20	MS2 targeting
M1040	3.18878	0.178694	-0.914121	3.50777	2.56769	2.83489	3.19988	-6.13898	1.97993	20	MS2 targeting
M1041	1.11945	-3.31956	-3.08945	2.19434	-0.778722	2.40294	1.18043	-1.57845	1.02332	20	MS2 targeting
M1042	5.39304	1.22373	7.82297	5.11594	1.19469	3.4713	5.20729	4.62669	7.40474	20	MS2 targeting
M1043	3.08909	0.178694	-0.914121	3.75029	1.86941	2.16916	3.47377	-1.57845	-1.58691	20	MS2 targeting
M1044	3.91606	2.48608	0.440453	3.56114	-1.0919	0.674976	3.8601	5.22071	0.366216	20	MS2 targeting
M1045	5.5538	2.80284	5.49679	5.62036	4.59935	9.55467	5.12341	4.6818	2.01827	20	MS2 targeting
M1046	8.39664	7.28514	10.2488	8.52533	8.11001	10.0582	8.20113	8.16449	9.9435	20	MS2 targeting
M1048	3.96545	1.89184	-2.17931	4.10887	0.203609	-0.884567	3.65159	-2.51857	4.54752	20	MS2 targeting
M1049	3.95262	3.39274	-0.65753	3.78275	1.33138	2.507	4.03644	5.99057	-0.400092	20	MS2 targeting
M1050	4.11349	3.929	4.29575	4.02723	1.39516	6.69938	3.83354	3.54074	0.945874	20	MS2 targeting
M1051	4.00826	5.97213	6.54205	3.92623	3.7357	3.12388	3.90226	-0.0348371	0.106354	20	MS2 targeting
M1052	4.91538	6.82983	4.98759	4.80431	7.44981	5.69224	4.94411	7.53785	4.5735	20	MS2 targeting
M1053	1.66396	-1.87772	4.20977	2.34106	5.6124	0.0964108	2.238	2.8214	3.64956	20	MS2 targeting
M1054	4.07847	2.57202	4.24163	4.17883	7.43472	5.98134	4.20913	5.27249	2.55014	20	MS2 targeting
M1055	4.35502	5.22547	2.31393	4.26867	4.67195	3.61796	4.59651	3.60868	5.0968	20	MS2 targeting
M1056	5.63075	6.46451	6.15976	5.71759	6.19723	6.11909	5.74962	5.90824	5.77409	20	MS2 targeting
M1058	3.07968	4.05374	-0.914121	3.32147	-0.778722	-0.0935013	3.17364	4.73053	0.777277	20	MS2 targeting
M1059	4.65671	5.04564	5.35471	4.81847	5.78601	2.21085	4.61807	6.36214	2.26141	20	MS2 targeting
M1060	6.71315	5.90954	7.12907	6.6971	5.50449	8.49188	6.61647	8.25547	6.87006	20	MS2 targeting
M1061	6.22681	6.18485	7.02536	6.21354	7.21487	4.96043	6.33327	6.80531	6.31243	20	MS2 targeting
M1062	4.48906	5.20208	1.90027	4.41252	5.65536	2.91275	4.65268	2.36306	2.12753	20	MS2 targeting
M1063	3.90544	3.55982	-0.65753	4.05673	6.35188	6.47824	3.94632	3.50044	4.33615	20	MS2 targeting
M1065	1.98963	-0.059029	1.43289	1.83442	-0.303365	-0.570217	1.66025	-1.97325	-0.400092	20	MS2 targeting
M1066	6.45737	4.05374	4.99228	6.41284	5.98824	4.62486	6.60572	6.88868	5.55362	20	MS2 targeting
M1067	3.76861	-0.510485	5.85449	3.75029	3.18797	5.52052	4.03644	4.56451	4.35874	20	MS2 targeting
M1068	1.99965	3.03241	0.0664604	2.65343	-0.303365	-0.0935013	2.54685	-0.609351	-1.58691	20	MS2 targeting
M1069	3.64002	0.720459	1.05665	3.94069	5.47159	1.89002	3.26097	3.42707	2.22909	20	MS2 targeting
M1070	5.60062	3.8793	6.02437	5.88542	4.29946	5.2325	5.67676	6.69801	5.17948	20	MS2 targeting
M1071	5.23876	5.94017	3.38502	5.77277	4.12236	10.599	5.42646	4.39347	6.70946	20	MS2 targeting
M1073	1.88543	-1.87772	-0.65753	2.05245	1.57114	0.994338	1.64506	-0.293683	0.864037	20	MS2 targeting
M1074	6.52309	6.69866	7.65199	6.65564	5.25665	7.36958	6.53534	6.33087	9.14443	20	MS2 targeting
M1075	3.59777	-1.17116	-0.65753	3.78915	1.99821	-0.570217	3.84022	3.30366	3.64956	20	MS2 targeting
M1076	4.77662	4.59019	2.3436	4.58441	-0.303365	-0.884567	4.6239	-1.57845	4.43157	20	MS2 targeting
M1077	3.64959	1.16962	0.644891	3.2947	3.52379	4.29734	3.49511	-0.0348371	-6.13898	20	MS2 targeting
M1078	5.66735	4.52703	5.28762	5.65233	4.42699	6.61067	5.84581	5.01434	7.50011	20	MS2 targeting
M1079	4.22443	1.22373	2.83624	4.05407	-0.521553	7.37875	4.07097	5.03918	3.33717	20	MS2 targeting
M1080	2.63525	-0.059029	-0.914121	2.70853	-0.113881	-0.884567	2.5304	2.36306	-2.14144	20	MS2 targeting
M1081	2.71645	4.8659	2.05172	2.1552	7.19932	5.04354	2.12204	2.59129	3.67378	20	MS2 targeting
M1082	3.12157	4.85308	3.8658	3.02848	7.2049	5.02028	2.96305	2.99101	3.63729	20	MS2 targeting
M1083	4.36474	4.3799	4.30331	4.82472	5.44169	4.42681	4.60635	1.49564	1.16675	20	MS2 targeting
M1084	3.64002	-2.42555	-2.17931	3.61622	5.31963	-1.84726	3.33387	-6.13898	5.30108	20	MS2 targeting
M1085	5.28557	6.51285	1.77524	5.28636	6.64536	3.73688	5.41978	5.86722	7.69538	20	MS2 targeting
M1086	3.27379	1.78792	1.19326	2.87435	1.57114	-1.28706	3.18419	2.11868	3.15989	20	MS2 targeting
M1087	3.38879	-0.343804	0.202186	3.28114	-2.96659	9.04007	3.38049	0.461482	5.56661	20	MS2 targeting
M1088	5.73487	6.28527	7.8177	5.80395	6.1541	9.48973	5.90363	6.7091	6.45377	20	MS2 targeting
M1089	4.48193	5.64534	6.94781	4.12668	5.28217	3.48835	4.31135	3.42707	3.78913	20	MS2 targeting
M1090	5.40062	6.50467	7.42454	5.35381	6.71418	8.52685	5.87948	5.13115	5.32038	20	MS2 targeting
M1094	0.12884	-6.13898	-1.62559	1.30095	-6.13898	-1.28706	1.44898	-6.13898	-2.14144	20	MS2 targeting
M1095	-0.0251414	-1.17116	-3.08945	0.627854	-2.04891	0.550611	0.796184	-1.01402	-3.05384	20	MS2 targeting
M1096	3.1398	3.93712	4.5712	2.95062	6.42245	1.1737	3.18944	4.29675	5.29328	20	MS2 targeting
M1097	1.47583	1.8234	4.53309	1.14987	0.203609	0.674976	1.56657	6.38861	5.20463	20	MS2 targeting
M1098	1.53213	2.32213	3.62133	1.77112	-2.04891	-0.884567	1.89677	6.10756	0.945874	20	MS2 targeting
M1099	3.88667	0.0647235	0.440453	3.23964	5.00909	2.21085	3.57748	-0.0348371	2.69918	20	MS2 targeting
M1100	4.31547	5.07537	7.74731	3.86994	5.52957	4.68526	4.06241	2.93162	2.72258	20	MS2 targeting
M1101	4.09725	3.23042	8.79267	4.28689	5.25665	5.4742	4.2574	5.58591	10.3631	20	MS2 targeting
M1102	3.10774	4.64575	-1.62559	3.27202	-2.04891	-0.884567	3.07502	4.5547	3.74409	20	MS2 targeting
M1103	3.47748	5.58201	4.00225	3.49998	8.52696	5.3584	3.79962	-1.26881	6.24735	20	MS2 targeting
M1104	2.69811	2.78495	6.41857	2.70853	-2.04891	-0.884567	2.38246	5.94625	-3.05384	20	MS2 targeting
M1105	3.14432	2.74851	6.84397	3.55739	-6.13898	1.66855	3.40326	5.97043	-0.617989	20	MS2 targeting
M1106	5.4091	5.54795	8.49102	5.23098	9.21283	5.22234	5.29632	3.76146	5.73433	20	MS2 targeting
M1107	3.79473	4.68002	8.471	3.83321	2.22573	3.3271	3.9648	3.86033	4.79944	20	MS2 targeting
M1108	3.49175	-0.510485	6.06945	3.47238	1.86941	7.45879	3.47806	4.19939	1.02332	20	MS2 targeting
M1109	-0.197543	-3.31956	-1.62559	0.912344	0.961805	3.63337	0.9276	-2.51857	-1.58691	20	MS2 targeting
M1110	2.96165	7.53364	7.08365	3.31704	0.578013	0.789467	3.3527	5.43101	1.09681	20	MS2 targeting
M1111	4.91935	5.35234	4.10974	5.16232	6.6021	5.89446	5.4895	6.93194	8.38923	20	MS2 targeting
M1112	5.21531	7.88168	3.65721	5.27271	5.96741	6.19895	5.43421	2.24604	4.61787	20	MS2 targeting
M1113	4.26445	0.930268	7.00346	4.49712	0.0535801	6.20412	4.62583	2.86967	3.21044	20	MS2 targeting
M1114	7.66153	8.15361	8.60907	7.80998	9.08904	9.48124	8.05894	9.18625	8.45053	20	MS2 targeting
M1115	4.9377	4.60555	2.50981	5.07458	6.35188	3.87295	5.1357	4.01855	5.07877	20	MS2 targeting
M1116	4.06899	3.73771	5.48019	3.986	0.782634	7.84541	4.18043	-0.158463	2.65119	20	MS2 targeting
M1118	4.00329	6.2805	3.78162	4.46347	3.83102	3.18791	4.63163	5.24226	6.86086	20	MS2 targeting
M1119	2.46493	0.178694	1.58965	2.51344	2.39126	1.33321	3.18419	-1.01402	5.03269	20	MS2 targeting
M1120	1.97954	4.73695	6.40281	2.80651	6.78135	1.47683	2.84165	1.79127	0.864037	20	MS2 targeting
M1121	4.55508	4.14771	5.57077	5.01024	4.61282	7.53872	4.5706	7.94177	9.96252	20	MS2 targeting
M1122	4.61984	7.03575	7.64232	4.82784	6.05639	3.79286	4.79373	5.64026	5.4204	20	MS2 targeting
M1123	4.94808	2.92219	3.7037	5.07851	3.03622	6.16488	5.05894	4.78188	7.22075	20	MS2 targeting
M1124	5.37871	5.48565	6.60311	5.39114	5.69074	3.48835	5.53865	3.95285	1.90006	20	MS2 targeting
M1125	6.60657	8.10308	7.93011	6.5736	8.18636	8.66824	6.60277	7.27881	7.68648	20	MS2 targeting
M1126	7.76903	7.183	9.04145	7.91585	8.40107	8.28604	7.90557	8.44161	8.09907	20	MS2 targeting
M1127	4.54827	5.20208	4.43316	4.74788	0.203609	1.78353	5.1124	5.71702	5.81549	20	MS2 targeting
M1128	4.87514	5.04939	5.58946	4.85557	5.19078	5.81221	5.14112	5.55918	1.62989	20	MS2 targeting
M1129	3.76861	2.57202	1.68542	3.58342	2.48217	-0.570217	4.21686	1.41119	7.23709	20	MS2 targeting
M1130	3.42641	4.00822	5.19708	3.61261	0.0535801	0.0964108	3.77889	1.45403	3.38196	20	MS2 targeting
M1131	5.10248	7.44743	4.60833	5.01298	7.80126	0.994338	5.0831	5.46806	7.50602	20	MS2 targeting
M1132	-0.502259	-6.13898	1.05665	-0.198275	-6.13898	-2.77542	-0.0868313	-3.40579	-6.13898	20	MS2 targeting
M1133	2.06789	-2.42555	-0.250588	1.96463	-0.113881	-0.312258	1.79028	-0.158463	3.2269	20	MS2 targeting
M1134	3.58785	-0.69897	4.53309	3.48821	2.88893	4.73611	3.55732	3.3269	3.98574	20	MS2 targeting
M1135	2.29637	3.12062	-6.13898	3.25361	-0.113881	3.53833	2.61082	4.48927	-2.14144	20	MS2 targeting
M1136	6.88208	7.86847	7.14074	7.14607	6.9501	8.54683	6.97015	8.27091	6.21057	20	MS2 targeting
M1137	6.54847	7.02054	6.69515	6.64066	8.40398	6.11909	6.48981	6.84609	8.63993	20	MS2 targeting
M1138	7.25387	9.42189	7.92889	7.33823	7.12368	7.81193	7.14069	8.56736	8.91919	20	MS2 targeting
M1139	7.77342	9.6794	9.36535	7.9142	9.94397	8.58795	7.90815	8.91849	9.1146	20	MS2 targeting
M1140	3.66541	4.61571	1.05665	3.51164	3.11409	2.29078	3.82345	2.96162	7.65869	20	MS2 targeting
M1141	6.0746	6.59726	7.88418	6.18347	7.30168	7.90456	6.26719	6.78343	6.89474	20	MS2 targeting
M1142	3.96545	4.68967	1.12657	4.01362	-0.113881	-0.570217	3.87321	2.11868	1.16675	20	MS2 targeting
M1144	3.74796	5.06429	2.75026	3.94929	2.51124	2.60407	3.87321	2.96162	2.12753	20	MS2 targeting
M1145	5.75127	5.61782	4.50054	5.77842	9.66613	5.41746	6.23836	8.15964	7.04156	20	MS2 targeting
M1146	3.31047	0.930268	5.25286	3.10749	-2.04891	2.12623	3.50357	0.954638	-0.400092	20	MS2 targeting
M1148	2.32852	0.382732	0.644891	2.76161	-2.96659	-1.84726	2.79422	-2.51857	0.684964	20	MS2 targeting
M1149	2.01947	-0.194401	-0.0833721	2.14525	-6.13898	-1.28706	2.3547	-6.13898	-2.14144	20	MS2 targeting
M1152	2.66702	5.77558	7.08255	2.75508	2.74948	7.17925	2.62638	4.04681	6.17496	20	MS2 targeting
M1153	3.78028	6.32449	4.79705	3.54987	4.09381	9.46679	3.92131	5.58832	6.34862	20	MS2 targeting
M1154	3.1844	4.3799	7.04468	3.24897	1.19469	4.19719	3.62473	-1.26881	2.46942	20	MS2 targeting
M1155	3.74498	4.77821	3.64535	3.66927	3.65983	9.03028	3.93699	5.02148	2.55014	20	MS2 targeting
M1156	1.94885	-0.915834	-6.13898	1.48581	0.961805	1.47683	1.69018	0.184556	-0.400092	20	MS2 targeting
M1157	2.52165	-1.87772	-0.250588	2.45823	5.42651	0.994338	2.238	-0.0348371	-1.18733	20	MS2 targeting
M1158	2.59617	-0.343804	2.15571	3.21607	5.57847	8.32809	2.8746	-0.442901	3.15989	20	MS2 targeting
M1159	3.23191	2.16506	-0.0833721	3.10749	-2.04891	1.60743	3.44773	2.57197	-3.05384	20	MS2 targeting
M1160	5.29272	5.40012	4.5459	5.28975	5.49724	6.46968	5.21888	6.08218	4.15014	20	MS2 targeting
M1161	7.88098	10.2602	9.60408	7.85819	9.22796	10.0957	7.73056	10.8154	10.4011	20	MS2 targeting
M1162	6.10508	9.60139	9.66537	6.12896	8.37955	7.85694	6.29301	4.72617	5.00909	20	MS2 targeting
M1163	3.73302	1.71423	4.10108	4.11653	1.62533	2.83489	3.74721	5.88102	-3.05384	20	MS2 targeting
M1165	0.836105	-6.13898	4.52664	0.508712	-2.96659	-2.77542	1.13764	2.24604	-3.05384	20	MS2 targeting
M1167	1.13771	-1.48161	4.39116	0.958542	8.35019	-0.570217	1.02474	-2.51857	-1.18733	20	MS2 targeting
M1168	-0.748286	3.54927	-6.13898	-0.539807	-2.96659	-6.13898	0.0579045	-1.57845	-6.13898	20	MS2 targeting
M1169	1.59955	4.69446	1.77524	1.60678	-0.521553	-1.28706	1.26239	3.87617	2.32397	20	MS2 targeting
M1170	-0.502259	0.284317	0.546291	0.539432	1.72797	1.83776	0.270899	1.91909	1.47312	20	MS2 targeting
M1171	0.984721	1.85803	1.73103	1.71839	-2.96659	0.264207	1.51734	0.693715	2.69918	20	MS2 targeting
M1172	5.12896	7.085	0.546291	4.88128	6.71105	6.78468	5.289	7.47553	4.2421	20	MS2 targeting
M1173	6.44459	5.84411	6.63044	6.30466	6.43957	8.95331	6.73111	8.61887	7.63344	20	MS2 targeting
M1174	4.37632	3.929	8.34788	4.66846	3.52379	9.05445	4.67903	6.61077	3.75548	20	MS2 targeting
M1175	1.70127	1.22373	-0.0833721	1.95326	2.42221	3.76514	2.64178	2.09181	6.80301	20	MS2 targeting
M1176	2.97186	1.8234	3.53397	2.94489	2.84393	-0.0935013	3.36666	3.51062	3.45365	20	MS2 targeting
M1177	6.19283	8.65701	7.37871	6.37873	7.59182	5.87514	6.59191	8.26114	8.84014	20	MS2 targeting
M1178	5.98856	7.80444	9.11398	6.10798	7.39335	8.92932	6.28568	8.06262	6.67087	20	MS2 targeting
M1179	5.63236	7.86315	5.66483	5.93609	7.39432	3.12388	5.99487	8.45354	5.3694	20	MS2 targeting
M1180	0.901681	-1.87772	-1.62559	1.53237	-2.96659	0.994338	0.9276	-6.13898	-3.05384	20	MS2 targeting
M1182	1.85264	0.0647235	0.983169	1.7049	-2.04891	2.40294	1.7764	-6.13898	-1.18733	20	MS2 targeting
M1183	0.454321	-6.13898	4.09237	0.539432	-2.04891	-2.77542	1.44898	-0.293683	1.62989	20	MS2 targeting
M1184	2.44307	-0.194401	4.10108	2.78744	0.463678	-0.570217	2.58716	0.62038	-0.0435375	20	MS2 targeting
M1185	3.30644	1.27589	3.64535	3.59077	2.62201	0.0964108	3.38964	0.0790259	1.8584	20	MS2 targeting
M1186	5.77843	5.21549	7.2456	5.59408	3.69826	6.62037	5.93052	8.54431	5.58589	20	MS2 targeting
M1187	4.95968	6.19842	5.0155	5.0266	2.62201	8.01899	5.13298	4.59354	6.50022	20	MS2 targeting
M1188	5.72735	6.51013	5.55183	5.63555	0.782634	7.63948	5.78211	4.78608	4.46665	20	MS2 targeting
M1189	3.91341	5.66991	7.97819	4.29816	3.68556	5.3584	4.4402	6.34943	6.89216	20	MS2 targeting
M1190	3.53027	2.27165	-3.08945	3.6518	0.874999	-0.884567	4.01295	1.0693	2.19602	20	MS2 targeting
M1191	4.43102	1.92489	2.37266	4.48138	3.22354	8.43639	4.70674	0.184556	2.26141	20	MS2 targeting
M1192	4.09958	6.0034	6.4496	4.14427	3.49497	-1.28706	4.33048	3.50044	4.88492	20	MS2 targeting
M1193	2.79908	6.50604	6.89118	2.74194	-0.521553	4.18678	3.55326	2.96162	7.00504	20	MS2 targeting
M1194	3.05587	6.25311	2.05172	3.11261	1.99821	5.6474	3.49087	4.54977	3.68574	20	MS2 targeting
M1195	4.587	7.25542	7.18442	4.62436	5.94361	8.33459	4.94876	4.37687	8.94927	20	MS2 targeting
M1196	5.58074	10.281	8.73157	5.5161	8.23944	8.1406	5.91	7.60711	8.07881	20	MS2 targeting
M1197	3.45217	3.39274	6.90617	3.50388	8.59601	8.03721	4.0306	4.77345	6.24129	20	MS2 targeting
M1198	4.21371	7.56999	6.36895	4.43924	7.62877	7.35919	4.70124	8.08707	8.01684	20	MS2 targeting
M1199	5.44253	7.34282	5.86219	5.18192	5.72527	4.47038	5.42979	6.24046	10.484	20	MS2 targeting
M1200	3.77737	1.37486	2.81522	3.07116	3.87642	4.62486	3.58943	6.32078	5.37311	20	MS2 targeting
M1201	0.71972	4.98426	-0.914121	0.309234	0.782634	3.36453	1.67529	0.461482	2.49683	20	MS2 targeting
M1202	2.58955	4.81393	6.17015	2.82533	5.5117	6.78295	3.11969	2.8214	0.106354	20	MS2 targeting
M1203	3.01201	2.16506	6.00825	2.44207	0.203609	3.45404	3.2709	3.93027	0.106354	20	MS2 targeting
M1204	2.45039	5.75275	6.15976	2.51344	9.41144	3.63337	2.97526	3.20678	4.84814	20	MS2 targeting
M1205	1.92801	4.06119	2.40115	2.21351	-0.778722	-0.570217	2.42757	8.16126	3.27519	20	MS2 targeting
M1206	5.82917	7.08226	7.24952	5.88691	9.59302	7.65561	5.9684	9.05173	9.49387	20	MS2 targeting
M1207	4.88328	6.1006	7.16378	5.27043	9.90821	9.11575	5.19168	8.43928	5.80182	20	MS2 targeting
M1208	2.57622	3.17656	4.38404	3.03927	0.0535801	-0.884567	2.73803	5.3847	0.480471	20	MS2 targeting
M1209	2.89344	-1.17116	4.69143	3.08684	7.94269	4.3819	3.2154	4.81923	1.35825	20	MS2 targeting
M1210	0.695272	-3.31956	5.06085	0.508712	-2.96659	-2.77542	1.22199	0.374948	-6.13898	20	MS2 targeting
M1212	2.69195	-1.48161	-1.62559	3.23496	2.88893	-0.312258	2.92581	-3.40579	-1.58691	20	MS2 targeting
M1213	1.25943	1.85803	-3.08945	1.6355	-2.96659	-6.13898	1.79028	3.7005	1.62989	20	MS2 targeting
M1214	3.97056	1.27589	8.67071	3.94356	8.23455	0.994338	4.28708	6.32078	2.16218	20	MS2 targeting
M1215	2.38311	-0.69897	7.41409	2.79382	8.05801	0.550611	2.04308	-0.797542	-0.0435375	20	MS2 targeting
M1216	-0.620034	-0.194401	-0.0833721	-0.100306	-1.0919	0.0964108	-0.635996	-2.51857	-0.210827	20	MS2 targeting
M1217	4.17003	8.31304	4.96868	3.95215	4.14108	5.76401	4.09912	3.34977	0.586337	20	MS2 targeting
M1218	3.66855	5.1783	2.68224	3.6623	6.11675	6.34417	3.60523	7.83338	2.55014	20	MS2 targeting
M1219	3.45217	8.13388	2.31393	3.24897	3.59341	4.3819	3.58943	4.33163	4.28989	20	MS2 targeting
M1220	4.1341	8.39233	3.15342	4.03802	6.28612	5.85556	4.15652	7.78596	4.05192	20	MS2 targeting
M1222	3.03654	2.10866	0.983169	3.36928	0.782634	0.414504	3.54918	1.97899	2.91774	20	MS2 targeting
M1223	2.20408	1.1134	1.81813	1.98709	0.0535801	-1.84726	2.47131	-2.51857	-1.18733	20	MS2 targeting
M1224	4.58866	4.28765	1.12657	4.41044	1.62533	5.78141	4.58858	2.38537	5.68454	20	MS2 targeting
M1225	5.7266	-1.17116	3.01279	5.7557	2.67436	8.63895	6.15499	4.95219	3.88561	20	MS2 targeting
M1226	4.12726	-1.87772	2.93698	3.7601	-2.96659	8.59879	4.80745	4.61258	2.16218	20	MS2 targeting
M1227	1.91748	3.46191	-0.439758	1.91863	0.0535801	-0.884567	2.28778	1.75746	-0.874753	20	MS2 targeting
M1228	0.645097	-1.87772	-0.0833721	0.569512	-1.0919	-2.77542	1.41354	-0.158463	-1.58691	20	MS2 targeting
M1229	3.64321	0.720459	2.85696	3.23026	-0.778722	-0.884567	3.31478	-0.442901	1.77129	20	MS2 targeting
M1230	2.56951	2.93846	-0.0833721	2.76811	4.55117	-1.28706	3.03477	5.32825	4.23398	20	MS2 targeting
M1231	4.23082	8.06422	2.50981	4.19098	6.18149	2.93779	4.2524	3.87617	3.24318	20	MS2 targeting
M1232	5.34375	6.63643	-1.62559	4.92846	5.48996	5.58536	4.92063	5.50163	3.35225	20	MS2 targeting
M1233	4.51897	0.793838	5.23714	4.42697	2.74948	4.48744	4.50477	3.89961	4.06113	20	MS2 targeting
M1234	3.24881	1.8234	-0.439758	3.02848	2.03871	5.67372	3.13609	0.543118	5.14524	20	MS2 targeting
M1235	5.14032	3.61148	6.32316	5.32435	5.95952	7.15943	5.39159	3.67356	6.70064	20	MS2 targeting
M1236	4.06183	-1.17116	4.01152	4.16166	7.60621	7.4512	4.19094	1.75746	0.586337	20	MS2 targeting
M1237	5.66577	9.06673	6.69083	5.79044	7.74806	5.2526	5.87948	6.1859	5.59226	20	MS2 targeting
M1238	4.74571	5.11885	7.75768	4.71966	7.44605	8.17984	5.04018	3.52073	4.50765	20	MS2 targeting
M1239	5.94062	9.03681	8.03383	5.87115	9.17473	5.33973	6.05	5.77519	7.48735	20	MS2 targeting
M1240	6.08992	9.0607	6.58149	6.28553	8.77561	8.37755	6.22053	7.5916	8.39834	20	MS2 targeting
M1241	3.17559	-1.48161	-1.62559	3.38628	5.04929	6.31341	2.91318	5.41212	5.91028	20	MS2 targeting
M1242	4.14993	5.89919	2.18878	4.57517	-1.0919	1.54361	4.50687	2.78831	3.63729	20	MS2 targeting
M1243	4.28302	3.21714	6.38331	4.1934	1.72797	8.20132	3.79274	5.69263	-1.58691	20	MS2 targeting
M1244	1.6513	3.16278	-1.62559	1.96463	-0.303365	-0.884567	1.80403	5.69039	-2.14144	20	MS2 targeting
M1245	3.24461	2.32213	-0.914121	3.00115	-1.49246	0.0964108	3.38508	-1.57845	0.106354	20	MS2 targeting
M1246	1.57296	0.0647235	2.53574	2.10474	-2.96659	-0.884567	1.00106	-2.51857	-2.14144	20	MS2 targeting
M1247	1.47583	0.284317	-1.22644	1.4377	-2.96659	0.0964108	1.39549	-6.13898	-1.58691	20	MS2 targeting
M1250	0.695272	0.178694	-0.0833721	1.14987	-1.49246	1.0868	1.11575	1.57541	2.85558	20	MS2 targeting
M1251	5.01752	9.78875	5.94677	5.06274	5.89756	2.21085	5.19168	3.59917	0.684964	20	MS2 targeting
M1252	4.18327	5.5846	9.99473	3.98041	1.26466	4.02091	4.27232	2.64775	0.242128	20	MS2 targeting
M1253	2.38311	0.178694	-0.914121	2.04176	-6.13898	3.97326	2.16529	1.72284	-1.58691	20	MS2 targeting
M1254	3.66541	-0.194401	2.12188	3.75357	2.1538	0.895536	3.84022	3.56048	2.60155	20	MS2 targeting
M1255	3.68417	1.75155	1.31805	3.52705	2.53974	0.550611	3.90864	1.91909	5.61119	20	MS2 targeting
M1256	3.58452	5.18172	2.81522	3.21131	1.77667	8.1929	3.32912	3.73565	3.75548	20	MS2 targeting
M1258	4.44208	7.6586	7.34244	4.78361	9.02717	4.20753	4.58858	7.43467	10.2467	20	MS2 targeting
M1259	5.27427	8.71543	6.86968	5.11466	7.74117	7.57709	5.0831	7.69735	5.79907	20	MS2 targeting
M1260	3.20619	4.27489	6.66022	3.34774	3.87642	-1.84726	3.58147	0.763502	7.15344	20	MS2 targeting
M1261	1.57296	1.46748	-0.250588	0.935628	4.87012	0.674976	1.09353	2.70207	-1.58691	20	MS2 targeting
M1262	2.92532	-1.48161	-0.250588	3.07641	0.0535801	-0.0935013	2.06608	-0.609351	0.864037	20	MS2 targeting
M1263	3.71185	2.39469	0.644891	3.747	0.782634	4.16574	3.38049	-1.26881	2.19602	20	MS2 targeting
M1264	4.56017	3.19022	3.3268	4.41873	3.48034	7.28061	4.56253	0.0790259	6.56316	20	MS2 targeting
M1265	6.17305	5.4089	5.27612	6.0317	3.40489	6.24733	5.79508	7.12988	8.08051	20	MS2 targeting
M1266	4.3472	7.85085	3.77074	3.93781	4.55815	5.45264	3.91815	3.2919	6.91266	20	MS2 targeting
M1267	3.56779	0.930268	2.56121	3.49998	3.85389	1.25566	3.32912	0.62038	3.68574	20	MS2 targeting
M1268	3.9187	3.21714	3.45464	3.79235	5.76805	3.64862	3.80305	2.14507	4.3736	20	MS2 targeting
M1269	5.20777	4.70876	1.53926	5.23098	3.69826	1.89002	4.97026	6.25113	3.96627	20	MS2 targeting
M1270	4.2094	4.43828	3.94535	4.44938	3.88755	1.72719	3.93074	1.32149	2.60155	20	MS2 targeting
M1271	7.26144	9.4026	7.80176	7.06228	7.67607	6.87335	7.04804	8.88659	6.77109	20	MS2 targeting
M1272	7.89009	9.39451	8.63029	7.92479	9.80853	8.65272	7.748	9.09424	8.75188	20	MS2 targeting
M1273	6.65055	7.69796	7.11839	6.65564	5.52245	8.08844	6.51615	8.56401	6.35425	20	MS2 targeting
M1274	7.03876	6.17458	5.23714	6.76367	8.84291	8.12297	6.57647	4.25496	7.36625	20	MS2 targeting
M1275	4.34327	4.3498	1.93965	4.29591	5.37604	-0.570217	4.22455	4.89504	2.74562	20	MS2 targeting
M1276	3.9266	2.13714	3.11952	3.75684	1.19469	-0.884567	3.85681	1.57541	4.39561	20	MS2 targeting
M1277	4.71107	7.22837	0.546291	4.72635	4.97819	4.95431	4.65078	2.73719	3.30651	20	MS2 targeting
M1278	6.33857	8.69132	5.76688	6.13085	0.339496	3.38288	6.19793	5.60742	8.05192	20	MS2 targeting
M1279	6.6257	8.71602	9.12095	6.2878	4.94661	4.06704	6.45537	8.29541	9.73397	20	MS2 targeting
M1280	5.5194	4.43828	6.19273	5.53242	-0.113881	6.59502	5.64751	5.32825	3.25928	20	MS2 targeting
M1281	6.10913	8.7913	8.59873	6.49448	6.84411	3.28868	6.4117	6.04763	9.05563	20	MS2 targeting
M1282	5.31194	7.50729	6.50643	5.13114	6.50064	5.75699	5.49904	3.31533	6.81259	20	MS2 targeting
M1283	6.52699	7.39091	5.06975	6.62105	7.62212	8.74562	6.60326	7.99895	4.91571	20	MS2 targeting
M1284	3.15332	-3.31956	-2.17931	3.00115	-2.04891	-1.84726	2.238	-1.26881	-0.874753	20	MS2 targeting
M1285	6.72339	7.10586	8.29809	6.68642	5.55073	6.35583	6.64014	5.8908	7.34378	20	MS2 targeting
M1286	6.56459	7.13616	8.78052	6.50765	9.44385	7.23082	6.39363	5.98511	8.88427	20	MS2 targeting
M1287	6.95629	5.17143	6.95143	6.62955	8.42419	5.5533	6.44992	6.19224	7.82404	20	MS2 targeting
M1288	8.73725	8.93329	9.16264	8.6173	9.58257	10.908	8.51937	9.85932	9.413	20	MS2 targeting
M1289	9.70487	10.5097	10.4098	9.53099	10.8711	11.3629	9.47625	10.0983	10.3989	20	MS2 targeting
M1290	9.59647	9.99656	9.63045	9.40287	9.20729	8.06092	9.21065	9.48145	9.51077	20	MS2 targeting
M1291	9.63127	9.39654	10.6968	9.50532	9.84145	10.3438	9.32808	9.30875	9.40533	20	MS2 targeting
M1292	5.55889	7.63258	6.13665	5.55138	5.37604	6.47611	5.46375	4.89115	7.33432	20	MS2 targeting
M1293	6.77679	7.05453	6.87477	6.42008	7.12955	7.04739	6.47269	8.14664	6.26937	20	MS2 targeting
M1294	9.09398	10.6353	10.2406	8.93119	10.2565	10.396	8.78656	9.55216	10.4389	20	MS2 targeting
M1295	9.07263	10.4905	8.16993	8.8258	10.5808	8.19225	8.84009	9.06539	10.0239	20	MS2 targeting
M1296	7.81479	9.88726	7.03107	7.8599	9.52827	8.41704	7.76084	8.09174	8.33757	20	MS2 targeting
M1297	7.44034	7.95499	6.75846	7.53185	7.57212	9.80635	7.32899	6.39686	8.46144	20	MS2 targeting
M1298	7.14158	8.71896	6.76258	6.9645	6.71574	6.39253	6.8327	6.34943	6.5036	20	MS2 targeting
M1299	6.11893	5.98785	6.81249	6.33124	7.58414	8.06376	6.45428	7.064	5.79356	20	MS2 targeting
M1300	2.70425	-0.510485	4.26507	2.70176	-0.303365	-1.84726	2.71638	-0.293683	-0.874753	20	MS2 targeting
M1301	5.09549	4.32526	-0.914121	5.22744	3.8652	7.58107	5.17987	6.38722	6.85557	20	MS2 targeting
M1303	3.20619	-0.343804	1.97798	3.28114	3.89859	5.15452	3.68541	6.67216	7.41556	20	MS2 targeting
M1305	3.19751	5.79581	-1.62559	3.2902	2.9539	-1.28706	3.42566	4.72617	4.61161	20	MS2 targeting
M1307	1.76138	4.24903	2.4834	2.21351	-0.113881	0.550611	2.73085	0.461482	-0.617989	20	MS2 targeting
M1308	5.18161	5.15759	5.47014	5.4829	6.1541	5.63214	5.50221	6.24809	5.57949	20	MS2 targeting
M1309	2.47214	-0.059029	0.202186	3.17752	3.90955	1.4068	2.96917	1.85659	1.72568	20	MS2 targeting
M1310	3.17559	1.46748	2.65883	3.68309	3.69826	-0.884567	3.44334	3.07575	-0.617989	20	MS2 targeting
M1311	5.79147	4.21604	6.69659	5.90693	2.26039	6.14082	6.1128	3.62752	5.30496	20	MS2 targeting
M1312	3.4703	5.84627	2.95631	3.99711	1.72797	6.10534	3.92131	2.4713	2.26141	20	MS2 targeting
M1313	1.94885	-1.87772	0.0664604	2.80018	-2.04891	-0.570217	3.03477	0.830068	3.73261	20	MS2 targeting
M1314	1.97954	5.41182	-0.914121	2.68124	-0.303365	1.54361	1.97178	-1.97325	-1.58691	20	MS2 targeting
M1315	4.92855	7.0215	5.31408	5.19163	2.03871	1.98919	5.18513	5.88298	4.72026	20	MS2 targeting
M1316	0.964405	-1.87772	-3.08945	2.00921	-2.96659	1.0868	1.30169	4.40444	1.41683	20	MS2 targeting
M1317	1.22569	-0.510485	-1.62559	1.46995	-2.04891	-2.77542	1.85775	1.32149	3.62492	20	MS2 targeting
M1318	3.56104	6.90006	4.11835	3.40725	6.44711	3.05688	3.52448	5.08419	5.91537	20	MS2 targeting
M1319	4.30743	8.00413	2.72794	3.74041	3.79601	1.83776	4.38638	4.76922	0.586337	20	MS2 targeting
M1320	2.22984	-2.42555	-0.914121	2.81908	1.04368	-2.77542	2.61863	-1.97325	-2.14144	20	MS2 targeting
M1321	3.10774	4.77368	-1.22644	3.41555	5.06408	-2.77542	3.31478	5.52694	1.52729	20	MS2 targeting
M1322	5.4644	6.58826	7.51694	5.66371	8.34918	5.39051	5.64751	7.1414	5.62368	20	MS2 targeting
M1323	6.1558	8.44168	8.28142	6.24301	5.06408	5.91668	6.41954	6.46128	7.37458	20	MS2 targeting
M1324	6.81523	6.73869	6.52273	6.82106	7.52657	7.54993	6.92446	7.71397	5.11017	20	MS2 targeting
M1325	7.92846	8.93912	7.36883	7.92479	8.86172	8.35157	8.06448	10.4276	8.25419	20	MS2 targeting
M1326	6.34595	6.07323	8.41316	6.45574	6.16557	7.1162	6.27214	5.33686	7.47448	20	MS2 targeting
M1327	6.82372	7.01192	7.78564	6.96414	5.71281	6.79842	6.8226	7.60057	7.55899	20	MS2 targeting
M1328	8.65288	8.93532	9.80885	8.73975	8.37314	7.68086	8.72035	8.84193	7.82336	20	MS2 targeting
M1329	2.47932	2.24574	-0.914121	2.65343	2.56769	0.895536	3.05791	-0.442901	2.74562	20	MS2 targeting
M1330	-0.0251414	-3.31956	-3.08945	-0.605504	-2.04891	-1.84726	-0.192075	0.830068	-6.13898	20	MS2 targeting
M1331	6.11893	3.17656	5.81268	6.02085	5.57503	3.64862	5.8232	4.6818	3.63729	20	MS2 targeting
M1332	4.85597	2.72993	2.58624	5.20367	5.89756	5.75699	4.88711	4.81923	7.23608	20	MS2 targeting
M1333	7.13023	5.68927	4.46724	7.04164	5.97003	5.92922	6.7171	6.51791	8.787	20	MS2 targeting
M1334	3.96545	0.561455	1.37661	4.27553	0.578013	5.92922	3.94322	3.52073	1.23345	20	MS2 targeting
M1335	3.42641	2.04997	1.37661	3.51551	1.72797	3.94883	3.04059	0.374948	1.41683	20	MS2 targeting
M1336	3.82885	1.42191	4.24949	3.986	0.961805	2.60407	3.70753	3.1296	2.19602	20	MS2 targeting
M1337	6.84783	7.54497	6.85688	6.83815	7.24222	5.90402	6.53482	6.47565	4.6303	20	MS2 targeting
M1338	6.06748	6.10961	6.60464	6.13589	6.63714	5.84898	6.04132	6.56386	5.84246	20	MS2 targeting
M1339	8.87907	10.6889	10.2828	8.90341	8.84932	10.5472	8.76244	8.81778	10.3781	20	MS2 targeting
M1340	7.10812	8.05445	7.17001	7.20265	7.59352	3.22907	7.14542	7.74179	9.91584	20	MS2 targeting
M1341	7.76738	7.46017	7.21182	8.03011	8.88898	9.41785	7.79179	8.27651	9.56581	20	MS2 targeting
M1342	8.91425	9.30145	8.6486	9.03193	9.80578	7.92741	8.83821	9.81031	9.25265	20	MS2 targeting
M1343	7.9176	7.66961	8.59719	8.11638	8.86841	8.42149	7.9285	6.95356	8.20881	20	MS2 targeting
M1344	6.72301	9.81515	5.57077	6.79225	8.383	9.26421	6.45101	8.12733	6.05791	20	MS2 targeting
M1345	7.15145	6.82874	7.41584	7.22083	6.62222	8.14262	7.19453	7.08715	10.2029	20	MS2 targeting
M1346	7.89127	10.0271	8.47394	7.85476	8.02311	10.1714	7.93671	8.84495	10.5089	20	MS2 targeting
M1347	3.01695	-1.87772	4.39116	3.32588	2.22573	-0.0935013	3.30031	5.7236	-3.05384	20	MS2 targeting
M1348	8.10949	8.04509	6.85431	8.59382	5.95952	5.00259	8.72273	8.80956	6.89345	20	MS2 targeting
M1349	7.55432	8.44168	7.31556	7.90207	6.74815	9.38437	8.14079	7.94365	8.60178	20	MS2 targeting
M1350	-0.682735	-1.87772	-3.08945	0.508712	-2.96659	-2.77542	0.348008	-1.26881	1.77129	20	MS2 targeting
M1352	4.05944	-1.87772	5.36559	3.68653	3.74796	3.01041	3.85681	5.06013	-0.210827	20	MS2 targeting
M1354	0.964405	-0.915834	2.56121	1.40471	2.42221	3.88587	1.22199	-0.442901	-1.18733	20	MS2 targeting
M1355	6.30008	5.70837	8.42014	6.46678	7.23025	9.15098	6.52292	7.3221	5.20878	20	MS2 targeting
M1356	5.63075	4.00822	4.5712	5.50544	5.78898	5.54925	5.3582	7.75524	5.67857	20	MS2 targeting
M1357	5.21639	4.19588	8.58638	5.43571	6.11439	7.38787	5.70543	7.38986	4.68494	20	MS2 targeting
M1358	4.58367	5.64534	3.45464	4.71125	2.9539	4.8394	4.55035	7.24871	5.81549	20	MS2 targeting
M1359	3.94745	1.37486	3.91603	4.31157	10.1975	8.51754	4.46205	4.08138	4.30548	20	MS2 targeting
M1360	5.12782	6.09335	5.00626	4.87828	5.57847	1.66855	5.21374	8.61946	6.47115	20	MS2 targeting
M1361	3.80334	4.43828	-2.17931	4.00263	-1.49246	3.76514	3.98002	0.374948	3.29094	20	MS2 targeting
M1362	5.90974	9.41628	4.88541	5.9274	7.76475	5.51637	6.12312	5.39298	4.66091	20	MS2 targeting
M1363	2.81619	5.6772	-2.17931	2.96766	-2.04891	0.895536	3.49087	4.12843	6.73845	20	MS2 targeting
M1364	3.74498	5.57423	0.202186	3.76661	-1.49246	0.789467	3.95251	4.11514	6.80438	20	MS2 targeting
M1365	4.39352	2.9862	7.97523	4.39373	2.26039	8.19355	4.475	1.61371	7.55818	20	MS2 targeting
M1366	0.0918576	0.793838	-3.08945	0.840151	-2.96659	-6.13898	0.740072	-6.13898	-2.14144	20	MS2 targeting
M1368	1.17355	-2.42555	0.644891	1.00331	-6.13898	0.674976	1.24233	-0.293683	-2.14144	20	MS2 targeting
M1369	4.38781	4.20263	7.14074	4.42079	-1.0919	1.1737	3.94942	5.93306	-0.0435375	20	MS2 targeting
M1370	5.32893	3.38088	6.2797	5.53813	5.93559	4.9726	5.46375	3.82812	7.31423	20	MS2 targeting
M1371	5.74607	5.38239	6.39043	5.86358	6.3559	4.62486	5.70635	5.93684	7.32479	20	MS2 targeting
M1372	7.07475	5.87825	8.43011	7.09205	7.4573	5.14917	7.00702	7.29878	7.56143	20	MS2 targeting
M1373	7.39623	6.76059	7.07594	7.34884	6.59363	7.89979	7.2502	5.83921	8.11353	20	MS2 targeting
M1374	6.60041	6.38659	5.23319	6.49203	7.03763	9.00569	6.39817	5.73884	8.22581	20	MS2 targeting
M1375	4.47477	4.3003	4.03898	4.50881	1.99821	5.30165	4.18043	4.45804	1.67858	20	MS2 targeting
M1376	5.7965	4.84878	3.13657	5.67413	2.26039	5.2476	5.66174	1.57541	5.28937	20	MS2 targeting
M1377	5.7893	4.78273	3.59691	5.63732	0.782634	6.19376	5.57318	2.38537	7.86735	20	MS2 targeting
M1378	-0.244066	-1.87772	-0.0833721	0.81526	-2.04891	-6.13898	-0.0868313	-1.57845	-0.874753	20	MS2 targeting
M1379	6.61107	8.17908	8.53788	6.56196	8.92047	10.1314	6.77671	8.14214	6.16645	20	MS2 targeting
M1380	5.84523	6.90317	5.32527	5.62574	6.52401	7.71114	5.50747	7.47748	2.81259	20	MS2 targeting
M1381	6.70284	6.52905	7.78968	6.39981	8.16765	7.14874	6.40945	5.97778	5.95544	20	MS2 targeting
M1382	6.88479	7.24972	3.84521	6.37288	9.80486	7.70385	6.37129	8.04696	10.1348	20	MS2 targeting
M1383	3.54744	2.44111	4.78088	3.66927	2.59511	3.96109	3.38049	-1.01402	1.94055	20	MS2 targeting
M1384	4.75165	5.06429	2.68224	4.80115	4.9034	4.60935	4.97482	4.58393	5.76566	20	MS2 targeting
M1385	5.36134	4.8271	4.32578	5.41515	4.19583	6.67539	5.38818	8.16287	6.03238	20	MS2 targeting
M1386	5.38923	5.74121	6.17428	5.40058	7.3079	2.60407	5.15862	6.50141	5.58269	20	MS2 targeting
M1387	2.21272	2.74851	3.64535	1.95326	1.62533	-0.312258	2.05463	-2.51857	-3.05384	20	MS2 targeting
M1388	2.89344	-0.510485	1.73103	2.52883	0.961805	0.789467	2.8811	-1.97325	1.35825	20	MS2 targeting
M1389	5.39208	6.92681	5.73086	5.18314	9.42773	0.789467	5.52522	6.54045	8.56259	20	MS2 targeting
M1390	6.12467	4.85736	6.19477	6.20039	5.94094	4.65538	6.06364	6.63191	3.82201	20	MS2 targeting
M1391	6.64617	7.76735	9.94404	6.45675	7.16314	8.72284	6.48981	6.7644	7.11194	20	MS2 targeting
M1392	6.39279	8.35758	7.26317	6.3782	4.57201	6.42389	6.36028	6.49116	7.30844	20	MS2 targeting
M1393	5.22815	6.40574	2.70527	5.32875	6.06622	7.83044	5.49163	4.43684	9.72911	20	MS2 targeting
M1394	4.53111	7.38053	9.14089	4.15671	0.782634	8.27319	4.29927	4.67729	7.52278	20	MS2 targeting
M1395	4.67558	7.9379	5.62008	4.86923	6.60547	8.09262	4.84284	3.88402	7.60459	20	MS2 targeting
M1396	1.84154	-2.42555	0.326233	1.95326	-1.49246	-0.312258	1.95954	-1.97325	0.586337	20	MS2 targeting
M1397	4.68957	6.89798	3.98353	4.43312	2.32731	5.60503	4.75	7.5735	5.0513	20	MS2 targeting
M1398	2.26349	-0.343804	0.546291	2.70853	-1.0919	-1.28706	2.6341	-1.01402	-3.05384	20	MS2 targeting
M1400	5.49659	5.82236	4.2573	5.40371	7.76249	1.54361	5.10548	5.15407	1.35825	20	MS2 targeting
M1401	5.76602	6.53575	4.94951	5.50447	3.8652	1.47683	5.78472	6.06846	8.16196	20	MS2 targeting
M1402	3.1844	0.993931	4.50711	3.34774	-0.521553	4.24814	3.84688	0.763502	0.242128	20	MS2 targeting
M1403	4.39732	5.13659	5.09613	4.76098	-0.303365	5.02028	4.45988	6.81971	-0.400092	20	MS2 targeting
M1404	4.01321	0.643147	5.19708	4.06994	5.02429	-0.312258	4.113	1.94935	3.32192	20	MS2 targeting
M1405	3.9629	0.284317	5.27612	4.06994	1.04368	1.1737	4.26488	6.53422	5.38782	20	MS2 targeting
M1406	3.45582	-1.17116	-1.22644	4.11142	5.34811	-0.884567	3.48661	0.830068	2.97734	20	MS2 targeting
M1407	4.68182	3.53863	7.748	4.95577	-0.113881	-0.0935013	4.8561	4.16757	1.09681	20	MS2 targeting
M1408	4.78678	2.44111	-0.250588	4.64217	3.56596	0.0964108	4.7104	6.35791	3.14264	20	MS2 targeting
M1409	6.87359	8.91208	7.11839	6.65213	4.64597	5.4613	6.44718	8.10986	5.65139	20	MS2 targeting
M1410	4.35307	-0.343804	3.10227	4.06203	4.17781	-2.77542	3.94632	0.830068	3.57436	20	MS2 targeting
M1413	5.477	3.96121	6.1535	5.31105	3.40489	5.89766	5.27673	6.00685	6.66182	20	MS2 targeting
M1414	4.83793	1.8234	3.53397	4.51655	0.683948	2.93779	4.41578	4.95965	7.7988	20	MS2 targeting
M1415	5.90642	3.38088	1.31805	5.53909	5.56119	6.46968	5.39954	6.64352	3.0715	20	MS2 targeting
M1416	5.96319	3.39274	4.31084	5.83446	8.14348	7.10519	5.89563	6.48859	5.18791	20	MS2 targeting
M1417	6.42242	7.95799	1.85978	6.15213	6.47135	5.31127	5.99187	6.61549	6.35986	20	MS2 targeting
M1418	5.99546	3.35687	7.04242	5.55421	4.73493	3.97326	5.602	8.69088	6.43971	20	MS2 targeting
M1419	6.84193	6.30737	3.74874	6.5023	5.51888	5.5329	6.41842	9.4507	4.84281	20	MS2 targeting
M1420	6.27504	7.92468	4.03898	5.68103	6.90699	8.45169	5.82826	3.034	-0.400092	20	MS2 targeting
M1422	2.89344	5.93003	7.21383	2.9845	0.339496	-1.28706	2.61863	5.07049	-2.14144	20	MS2 targeting
M1423	1.50425	-0.510485	3.66897	1.5015	3.96314	1.72719	1.11575	-2.51857	-3.05384	20	MS2 targeting
M1424	5.13351	4.79171	5.06975	5.0266	3.96314	8.35157	4.98693	3.91502	2.81259	20	MS2 targeting
M1425	2.30448	2.48608	-0.0833721	1.67754	-0.778722	0.674976	1.84451	1.75746	-6.13898	20	MS2 targeting
M1426	5.47431	4.40354	5.03381	5.50544	4.73493	7.04307	5.25061	6.87987	4.54752	20	MS2 targeting
M1427	6.83565	4.85308	7.26123	6.66263	6.29241	6.15424	6.26719	7.51653	7.71812	20	MS2 targeting
M1428	4.68957	-0.194401	5.3728	4.53	0.782634	6.72299	4.09912	3.89184	7.09635	20	MS2 targeting
M1429	3.89206	4.92016	1.73103	3.97481	2.8666	1.94046	3.67796	5.97962	6.2614	20	MS2 targeting
M1430	4.13182	-3.31956	-0.65753	4.28235	4.90887	-0.312258	3.84688	4.48927	1.67858	20	MS2 targeting
M1431	6.71657	4.55895	8.11831	6.74937	8.7868	6.78468	6.57497	7.28476	6.11872	20	MS2 targeting
M1432	7.9209	8.69162	7.90048	7.85628	9.54857	7.30006	7.66685	8.19638	9.7102	20	MS2 targeting
M1433	8.47884	8.53124	9.43332	8.35297	8.61497	9.35736	8.27688	8.6987	8.85312	20	MS2 targeting
M1434	8.1829	9.15379	6.453	7.97604	7.98864	7.62702	7.6472	7.56069	8.54012	20	MS2 targeting
M1435	2.54919	-2.42555	1.73103	2.37552	-6.13898	0.789467	2.46266	3.85235	1.62989	20	MS2 targeting
M1436	4.74868	-0.69897	-0.0833721	4.47742	-1.49246	3.64862	4.536	2.40733	1.62989	20	MS2 targeting
M1437	5.90974	2.65314	4.76999	5.79999	6.78731	2.78056	5.65701	6.12258	5.58589	20	MS2 targeting
M1439	3.74498	3.00177	-0.439758	3.63767	-0.303365	-1.84726	3.18944	1.45403	1.23345	20	MS2 targeting
M1440	6.50825	5.86342	6.26815	6.21533	6.90972	5.80542	6.23011	5.09438	5.89233	20	MS2 targeting
M1441	5.48772	6.83744	6.99764	5.42957	2.1538	-0.570217	5.42423	6.11759	8.08729	20	MS2 targeting
M1442	6.01966	7.15543	4.5712	5.68705	7.29438	8.10719	5.69625	7.2706	4.38831	20	MS2 targeting
M1443	6.05312	7.6506	7.02879	6.17677	5.40731	5.11664	6.3976	6.81869	7.52278	20	MS2 targeting
M1444	5.92033	6.53308	4.84968	5.9332	6.01893	5.12212	6.48928	5.63328	5.72856	20	MS2 targeting
M1445	5.55125	0.720459	5.52619	5.8899	7.12721	3.73688	5.78125	4.18038	3.80018	20	MS2 targeting
M1446	4.7472	5.27436	4.04801	4.88128	6.0011	7.2181	4.94255	5.22071	2.35425	20	MS2 targeting
M1447	5.38637	5.68927	7.3516	5.47696	6.7451	5.39955	5.66268	4.67729	7.74695	20	MS2 targeting
M1448	6.67224	9.24411	9.34693	6.77137	8.1625	8.22122	6.90665	9.16445	8.92141	20	MS2 targeting
M1449	3.89743	3.719	7.93317	3.76661	4.23992	5.61671	4.03352	2.93162	9.52935	20	MS2 targeting
M1450	2.77595	3.54927	3.58454	3.11771	4.6061	4.92956	3.1031	1.88818	7.57837	20	MS2 targeting
M1451	6.18791	5.88247	8.10647	6.1384	5.82416	7.74611	6.39703	4.45277	4.78839	20	MS2 targeting
M1452	6.65966	5.1783	6.18046	6.53981	5.74376	7.83628	6.30212	7.65494	5.76847	20	MS2 targeting
M1453	5.25454	5.2903	4.46724	5.4479	7.14934	5.7464	5.2034	1.65101	3.72103	20	MS2 targeting
M1454	4.13182	1.51165	-0.914121	4.39373	-0.113881	-0.312258	4.31616	5.1045	0.684964	20	MS2 targeting
M1455	5.8707	6.77426	4.22579	5.88915	6.85691	5.97833	5.76288	6.61195	7.288	20	MS2 targeting
M1456	5.35745	4.55368	3.18653	5.18314	1.33138	2.66533	5.06608	3.23162	4.0974	20	MS2 targeting
M1458	2.30448	1.42191	4.52016	2.19434	-1.49246	-6.13898	1.99594	2.22145	2.38392	20	MS2 targeting
M1459	6.28172	5.56377	7.77138	5.93681	3.8425	3.60238	5.9866	4.28494	5.33944	20	MS2 targeting
M1460	6.18188	5.82455	6.7708	6.00374	4.67837	1.25566	5.92895	4.29675	2.81259	20	MS2 targeting
M1461	5.30084	5.08271	3.25056	5.20367	5.24371	2.47314	4.78162	4.01855	-1.18733	20	MS2 targeting
M1462	4.45852	2.39469	3.93564	3.88795	3.35765	3.98532	3.56542	3.83624	1.8155	20	MS2 targeting
M1463	3.16672	3.34471	-0.0833721	3.2947	-2.96659	2.21085	3.08632	2.61036	-1.18733	20	MS2 targeting
M1465	3.42641	3.26953	0.546291	3.65881	5.74987	2.72409	3.48234	5.92165	6.62036	20	MS2 targeting
M1466	1.57296	3.83653	6.6807	2.07359	4.77143	-1.28706	2.13298	-1.26881	2.8766	20	MS2 targeting
M1467	4.31346	-1.87772	-0.0833721	4.65625	3.1515	-0.884567	3.8502	-1.97325	-1.58691	20	MS2 targeting
M1468	2.29637	-2.42555	2.89752	1.4213	-2.04891	0.414504	1.32094	0.374948	-6.13898	20	MS2 targeting
M1469	5.12896	3.25661	5.43957	4.95292	3.37356	2.66533	4.80574	2.70207	2.72258	20	MS2 targeting
M1470	5.21853	-0.915834	3.66897	4.60815	7.24439	-0.312258	4.34701	-1.57845	4.40288	20	MS2 targeting
M1471	4.04258	3.00177	4.68565	4.20781	3.22354	-0.312258	3.74008	2.00803	2.81259	20	MS2 targeting
M1472	4.10887	2.16506	0.546291	4.05141	5.11231	2.69501	4.113	3.45897	2.46942	20	MS2 targeting
M1473	6.38374	5.49393	6.49656	6.51588	5.61576	3.5052	6.55224	3.98972	3.57436	20	MS2 targeting
M1474	2.71037	-0.510485	-0.250588	2.53646	0.683948	3.58663	2.25812	3.01981	0.480471	20	MS2 targeting
M1475	3.17116	6.30423	3.2189	3.01215	-0.303365	4.29734	3.32436	1.72284	1.23345	20	MS2 targeting
M1476	4.85044	4.80951	6.5985	4.41044	3.11409	7.79061	4.49844	6.17474	3.01574	20	MS2 targeting
M1477	5.85837	6.17972	6.15768	5.82592	5.50087	6.38572	5.57619	7.47423	4.79944	20	MS2 targeting
M1478	4.37248	6.2932	0.202186	4.26178	-0.113881	8.12501	4.1725	6.36354	-1.18733	20	MS2 targeting
M1479	5.12439	6.73986	0.737182	4.82316	5.63239	4.60154	5.02705	3.69158	2.81259	20	MS2 targeting
M1480	5.5538	4.3437	4.28049	5.62126	5.50449	6.16488	5.42979	3.81174	5.78802	20	MS2 targeting
M1481	3.02678	-1.17116	3.52105	3.27658	0.463678	5.2526	3.65539	3.91502	6.34862	20	MS2 targeting
M1482	5.52461	4.43828	6.0849	5.32875	5.74069	6.5732	5.37211	5.09776	3.83281	20	MS2 targeting
M1483	7.07652	9.71052	9.87096	7.21964	9.13062	9.17191	7.22103	8.76373	8.0409	20	MS2 targeting
M1485	4.15666	6.15383	0.0664604	4.62615	4.57201	0.414504	4.28463	6.25416	4.38831	20	MS2 targeting
M1486	4.15442	6.32449	7.50714	4.2409	7.97631	7.55702	4.18832	5.59551	4.41729	20	MS2 targeting
M1487	2.92006	5.26149	7.1439	3.15786	-1.49246	7.87082	2.74517	3.70937	0.366216	20	MS2 targeting
M1488	5.27942	7.07307	6.59234	5.28183	5.41117	4.89161	5.47776	7.13894	6.72403	20	MS2 targeting
M1489	4.29731	5.67962	5.75037	3.7601	6.62222	5.41746	4.2944	7.45591	2.67538	20	MS2 targeting
M1490	2.39834	-2.42555	2.70527	2.43391	1.12116	-0.312258	2.73085	3.86033	2.60155	20	MS2 targeting
M1491	3.67169	4.01591	5.65007	3.955	-6.13898	0.414504	3.87321	2.91638	6.14711	20	MS2 targeting
M1492	1.70127	2.55101	1.48706	2.04176	-1.0919	-1.84726	2.25812	6.20013	-3.05384	20	MS2 targeting
M1493	1.40221	-6.13898	4.69143	1.87111	0.578013	-1.84726	1.93476	3.60868	-3.05384	20	MS2 targeting
M1494	2.81619	4.74622	5.98491	2.97891	1.62533	4.1551	3.25097	2.66608	3.96627	20	MS2 targeting
M1495	3.77446	4.84878	1.85978	4.45141	4.83605	5.86539	4.2524	5.48624	2.01827	20	MS2 targeting
M1496	2.941	1.22373	1.85978	3.40308	6.16329	5.35376	3.6363	2.22145	0.366216	20	MS2 targeting
M1497	3.74796	3.62159	5.65894	3.71372	1.45624	4.33554	3.4521	3.2919	6.44851	20	MS2 targeting
M1498	3.36186	-0.194401	2.18878	3.56114	3.53798	6.74088	3.26595	2.75443	3.30651	20	MS2 targeting
M1499	3.80048	-0.194401	5.84415	4.1063	8.35771	6.67539	3.83018	1.8243	1.09681	20	MS2 targeting
M1500	2.21272	-0.059029	1.68542	2.33231	4.65251	0.789467	2.25812	6.14563	3.91639	20	MS2 targeting
M1501	2.24676	0.863665	1.19326	2.29679	1.62533	1.47683	2.687	1.49564	3.24318	20	MS2 targeting
M1502	5.18161	4.73695	2.79389	5.02931	6.33369	4.31657	5.08169	5.62628	7.96626	20	MS2 targeting
M1503	3.86492	3.34471	-1.22644	4.05673	1.04368	2.16916	4.27479	4.5791	1.90006	20	MS2 targeting
M1504	4.50321	4.1891	4.88036	4.73964	8.74763	7.4359	4.60045	5.94437	8.3997	20	MS2 targeting
M1505	5.14597	5.86555	4.75903	5.33861	5.90853	1.0868	5.01675	7.75738	4.26619	20	MS2 targeting
M1506	2.09617	2.39469	3.65721	2.18465	3.07568	-1.84726	1.80403	-1.26881	-2.14144	20	MS2 targeting
M1507	3.73302	6.19504	3.04925	3.99987	2.4525	4.27786	3.71118	3.67356	1.67858	20	MS2 targeting
M1508	5.96575	5.95624	6.78573	6.08147	5.53312	9.28113	5.92659	3.67356	3.95643	20	MS2 targeting
M1509	2.09617	6.25636	2.68224	2.22301	-2.96659	3.45404	2.18644	-1.97325	-2.14144	20	MS2 targeting
M1510	0.645097	0.561455	-1.62559	1.06795	-2.96659	-0.884567	0.651586	1.8243	1.23345	20	MS2 targeting
M1511	3.08909	0.993931	1.68542	2.63221	-0.521553	3.03383	2.73085	-0.442901	-1.58691	20	MS2 targeting
M1513	1.62566	-1.87772	-1.62559	1.99819	-6.13898	-1.28706	1.69018	-2.51857	0.480471	20	MS2 targeting
M1517	3.8204	6.89798	-0.914121	3.69678	-2.96659	3.60238	4.34701	1.61371	3.35225	20	MS2 targeting
M1518	1.76138	-6.13898	-1.22644	1.45391	5.8585	6.16488	1.7764	-0.158463	-3.05384	20	MS2 targeting
M1519	3.3024	3.07719	2.12188	3.26284	6.01893	6.20412	3.50357	0.693715	-0.617989	20	MS2 targeting
M1520	4.87514	4.16855	8.69356	5.11848	6.69846	4.77832	5.3264	4.14159	4.00496	20	MS2 targeting
M1521	3.73002	9.39174	8.72525	3.91749	1.57114	1.25566	3.93387	3.37228	5.18791	20	MS2 targeting
M1523	4.57532	5.82236	4.97343	4.33802	6.43008	7.27939	4.34935	4.23668	5.70231	20	MS2 targeting
M1524	2.53549	5.33708	2.81522	2.13523	4.33242	6.98869	2.71638	3.034	-1.18733	20	MS2 targeting
M1525	5.38637	8.95295	7.96393	5.29652	6.6122	3.05688	5.08028	6.26923	8.42801	20	MS2 targeting
M1527	3.13071	0.0647235	8.05696	3.47636	5.47896	2.16916	3.60523	8.5508	-0.0435375	20	MS2 targeting
M1528	-0.0251414	-1.87772	5.42576	0.412418	5.53312	-0.0935013	0.651586	-0.442901	-1.18733	20	MS2 targeting
M1529	2.45768	-0.510485	6.29116	2.47422	5.93827	2.43847	2.33589	2.38537	-0.0435375	20	MS2 targeting
M1530	1.35617	-2.42555	4.1354	1.14987	0.874999	-0.570217	1.00106	-6.13898	-6.13898	20	MS2 targeting
M1532	1.29241	4.29399	7.90048	0.445235	-1.49246	-6.13898	1.70491	0.28289	-1.18733	20	MS2 targeting
M1533	3.23616	5.99176	4.83931	3.51164	5.64884	-0.0935013	3.3759	-1.57845	5.3768	20	MS2 targeting
M1534	2.28002	5.40598	4.71998	2.66043	5.48996	-0.884567	2.4799	1.12339	-1.18733	20	MS2 targeting
M1535	-0.341871	-6.13898	-2.17931	-0.674337	-2.96659	-6.13898	0.14691	-6.13898	-3.05384	20	MS2 targeting
M1536	1.49011	0.0647235	1.43289	1.5015	-1.49246	-0.0935013	1.74822	6.63889	2.26141	20	MS2 targeting
M1537	3.34231	7.3041	2.18878	3.65531	2.9539	2.91275	3.87971	0.893697	-0.210827	20	MS2 targeting
M1538	3.29429	2.13714	4.6564	3.5423	7.35577	2.72409	3.3386	0.374948	0.586337	20	MS2 targeting
M1539	2.28822	2.61315	-0.914121	2.42572	-0.778722	-0.0935013	2.66457	1.12339	-1.58691	20	MS2 targeting
M1540	2.18665	2.46377	2.12188	2.05245	3.59341	-1.84726	2.3264	6.6354	6.06937	20	MS2 targeting
M1541	4.85459	9.21017	7.56888	4.91973	5.78303	7.03584	5.08028	8.31006	9.50002	20	MS2 targeting
M1542	3.41896	7.55424	3.46817	3.62698	5.18628	6.21696	3.95251	2.19644	1.8155	20	MS2 targeting
M1543	4.72321	4.70876	7.25246	4.73633	5.42651	4.18678	4.88711	8.38081	4.42445	20	MS2 targeting
M1544	3.63038	6.05095	1.19326	3.7371	-0.113881	6.17545	3.99508	6.92339	5.95297	20	MS2 targeting
M1545	4.43656	4.60555	6.34532	4.5471	5.81835	3.96109	4.50687	6.51664	8.2562	20	MS2 targeting
M1546	4.42546	5.16107	5.91748	4.58072	3.53798	6.36279	4.82103	8.19598	3.83281	20	MS2 targeting
M1547	2.99708	2.80284	4.4537	2.85616	-1.49246	6.25482	3.25097	7.4104	2.60155	20	MS2 targeting
M1548	3.92134	5.93815	6.34898	3.99434	4.08417	5.133	4.08511	2.09181	6.87267	20	MS2 targeting
M1549	5.52894	7.10856	6.64093	5.52284	7.33965	6.31818	5.83162	6.22199	7.2742	20	MS2 targeting
M1550	5.31295	6.06769	5.97547	5.12988	4.19583	7.62027	5.30842	4.67276	3.08962	20	MS2 targeting
M1551	3.63681	4.31283	3.90612	3.97199	0.203609	1.72719	3.40326	4.78608	1.09681	20	MS2 targeting
M1552	4.93379	7.95349	3.58454	4.94577	1.67756	1.83776	4.74645	1.88818	4.92583	20	MS2 targeting
M1553	4.31346	5.04939	5.85449	4.26867	5.24804	2.96241	4.22711	5.32248	3.30651	20	MS2 targeting
M1554	5.99484	7.15629	4.36247	6.05448	8.09988	6.35583	6.14826	8.69032	5.3694	20	MS2 targeting
M1555	6.54634	6.18314	8.1751	6.52646	6.84696	7.84871	6.47108	5.81682	7.25326	20	MS2 targeting
M1556	5.88293	7.8379	7.18953	5.95401	6.70791	8.26579	5.90283	5.04269	5.0233	20	MS2 targeting
M1557	5.97403	5.16453	8.22027	5.94544	4.67837	8.43804	5.96075	2.57197	6.70799	20	MS2 targeting
M1558	2.95136	0.382732	1.58965	3.25823	2.19021	-0.570217	2.80109	4.9105	-1.58691	20	MS2 targeting
M1559	4.51549	5.83979	5.02469	4.62615	1.77667	1.78353	4.67716	4.44748	4.56057	20	MS2 targeting
M1560	3.0844	4.33144	0.983169	3.3607	1.62533	1.54361	3.00532	2.66608	2.32397	20	MS2 targeting
M1561	7.72989	8.77977	8.61136	7.51287	6.79472	7.41376	7.5506	8.66176	6.15143	20	MS2 targeting
M1562	6.41214	7.47279	7.28436	6.25982	5.37604	6.22969	6.34801	7.38917	7.91892	20	MS2 targeting
M1563	5.22495	6.64017	5.54547	4.97416	8.33807	0.414504	5.22656	5.3708	6.72548	20	MS2 targeting
M1564	3.62067	-1.87772	2.08723	3.48032	3.57975	0.0964108	3.49935	-3.40579	3.57436	20	MS2 targeting
M1565	3.59777	2.19246	1.37661	3.34339	2.26039	2.12623	3.84022	0.374948	-0.210827	20	MS2 targeting
M1566	5.64278	4.6308	6.42553	5.41515	3.16985	6.02582	5.62445	3.57025	5.11902	20	MS2 targeting
M1567	3.71793	3.93712	5.13057	3.94069	0.339496	6.26228	4.11851	4.65451	3.4254	20	MS2 targeting
M1568	3.43382	4.84447	2.50981	3.4483	4.25718	6.21696	3.61696	0.184556	7.44927	20	MS2 targeting
M1569	4.92593	6.33989	6.51623	5.13743	4.59935	4.73611	5.17987	5.06704	3.01574	20	MS2 targeting
M1570	4.49969	7.95549	3.95499	4.65274	3.99436	7.74257	5.03144	1.65101	4.54095	20	MS2 targeting
M1571	6.36351	6.26767	4.53309	6.42265	7.56521	8.3963	6.51092	6.73431	7.98695	20	MS2 targeting
M1572	5.62186	6.65993	7.06374	5.72596	3.22354	5.45264	5.8483	4.18038	4.64874	20	MS2 targeting
M1573	3.33442	6.04345	3.88611	3.17263	3.16985	0.0964108	3.60915	0.830068	-0.210827	20	MS2 targeting
M1574	2.18665	1.27589	-3.08945	2.45017	-0.113881	4.46177	2.82826	1.88818	-6.13898	20	MS2 targeting
M1575	1.29241	-3.31956	-1.22644	1.18915	-2.04891	4.48744	1.69018	1.68737	-3.05384	20	MS2 targeting
M1576	0.695272	2.57202	-1.62559	1.04672	0.578013	1.98919	0.7684	-0.609351	-0.874753	20	MS2 targeting
M1577	1.06324	1.71423	-1.62559	0.118948	0.463678	2.08198	0.456456	0.543118	-0.617989	20	MS2 targeting
M1578	0.454321	2.67272	-1.22644	0.81526	1.72797	-0.570217	1.24233	-0.158463	-0.210827	20	MS2 targeting
M1579	3.47748	1.67593	-3.08945	2.80651	0.203609	2.03633	3.95251	1.72284	-2.14144	20	MS2 targeting
M1580	1.59955	0.284317	-3.08945	1.53237	-0.521553	2.12623	2.40969	-6.13898	-6.13898	20	MS2 targeting
M1585	0.645097	-6.13898	-2.17931	1.28291	-6.13898	-2.77542	1.24233	-2.51857	-3.05384	20	MS2 targeting
M1586	2.64166	0.793838	7.21884	3.45234	-0.521553	-2.77542	3.22565	5.3511	4.25821	20	MS2 targeting
M1587	6.43262	9.74085	9.86698	6.53268	6.5575	8.19938	6.37877	7.70402	8.83444	20	MS2 targeting
M1588	6.35914	9.38044	8.3047	6.22481	5.72216	8.56302	6.20377	6.5953	8.91761	20	MS2 targeting
M1589	4.92724	6.62013	2.05172	4.76586	6.59871	3.3271	4.69018	6.31498	4.54095	20	MS2 targeting
M1590	4.52245	4.92425	1.12657	4.30711	6.12618	0.789467	4.30169	1.22583	1.23345	20	MS2 targeting
M1591	6.5183	4.18228	2.89752	6.50424	5.52957	6.21952	6.37187	5.54934	2.44148	20	MS2 targeting
M1593	3.26136	1.27589	-1.62559	3.27202	-0.778722	0.264207	3.34801	-1.97325	1.16675	20	MS2 targeting
M1594	3.93184	2.44111	1.73103	3.63412	0.463678	6.58117	3.8502	2.492	-0.617989	20	MS2 targeting
M1595	2.94619	4.5108	-0.914121	2.74194	0.782634	6.51199	3.41674	-1.57845	-2.14144	20	MS2 targeting
M1596	2.82748	6.14684	-1.22644	2.49004	-2.96659	3.4713	2.4799	-3.40579	-6.13898	20	MS2 targeting
M1597	2.99207	1.22373	-2.17931	3.21131	-1.49246	-0.884567	2.62638	2.91638	3.96627	20	MS2 targeting
M1598	5.8809	6.93899	6.34898	5.8391	5.33191	5.10563	5.56715	8.45782	7.13393	20	MS2 targeting
M1599	4.21801	4.88281	3.39922	4.53762	-0.778722	-0.570217	4.05381	4.58393	7.37551	20	MS2 targeting
M1600	4.46033	-0.059029	-0.250588	4.4042	4.83605	1.54361	4.16985	3.01981	-6.13898	20	MS2 targeting
M1601	4.64399	3.67111	3.99292	4.33584	0.463678	-0.884567	4.54626	3.81174	-0.400092	20	MS2 targeting
M1602	2.87723	0.0647235	-0.0833721	3.10236	8.01298	1.83776	3.13064	1.27445	1.97993	20	MS2 targeting
M1603	2.74055	0.863665	0.440453	2.1749	-0.521553	1.78353	2.06608	-6.13898	0.777277	20	MS2 targeting
M1604	1.47583	-6.13898	-6.13898	1.5626	-2.96659	-0.570217	1.43137	0.184556	1.16675	20	MS2 targeting
M1606	4.54657	6.3058	7.10654	4.4794	2.64842	1.0868	4.6297	4.06765	2.32397	20	MS2 targeting
M1607	3.1578	3.03241	4.19357	3.25361	-0.303365	-0.0935013	3.49087	4.37129	2.46942	20	MS2 targeting
M1608	3.30644	0.561455	1.68542	3.3947	2.79748	7.47492	3.42566	2.51241	1.62989	20	MS2 targeting
M1609	5.29272	6.38808	3.48157	5.12102	1.51483	4.62486	5.1956	6.40371	4.49411	20	MS2 targeting
M1610	4.21371	6.13454	7.4306	4.03533	2.39126	2.78056	4.33995	4.14159	3.35225	20	MS2 targeting
M1611	4.40676	6.95707	4.41231	4.41459	-0.778722	7.30608	4.1725	5.32248	3.08962	20	MS2 targeting
M1612	5.72585	7.39017	6.40457	5.77035	5.64228	9.50552	5.6196	6.15702	8.70565	20	MS2 targeting
M1613	4.79974	5.15759	6.03577	4.68573	4.71632	9.3798	4.61027	2.77147	8.02804	20	MS2 targeting
M1614	3.67482	0.561455	2.01532	3.827	2.77368	3.87295	3.61306	4.28494	4.91062	20	MS2 targeting
M1615	5.73412	7.09592	7.1216	5.6391	6.24561	6.75328	6.49882	2.94669	3.38196	20	MS2 targeting
M1616	5.39208	6.77539	9.16783	5.20726	6.871	4.03258	5.40067	8.63845	9.07338	20	MS2 targeting
M1617	6.9437	8.37076	9.00101	6.87173	8.21701	11.326	6.94283	9.5309	8.30886	20	MS2 targeting
M1618	5.86934	6.58051	7.83673	5.82436	7.51585	7.94989	5.89643	10.0832	4.52106	20	MS2 targeting
M1619	2.90414	0.474859	-3.08945	2.76811	1.39516	-2.77542	3.27585	7.67376	1.62989	20	MS2 targeting
M1620	3.3185	7.76905	2.77224	2.88036	1.26466	1.83776	3.2154	-0.293683	4.86402	20	MS2 targeting
M1621	3.3185	6.11319	2.89752	3.08163	-0.521553	2.25137	3.52448	2.3404	4.99954	20	MS2 targeting
M1622	1.73763	-3.31956	-1.62559	1.79677	-2.96659	-2.77542	1.46637	-0.797542	3.4254	20	MS2 targeting
M1623	4.85734	6.96801	6.79515	4.99923	7.90827	1.1737	5.04598	7.22803	3.9265	20	MS2 targeting
M1624	4.92855	5.42631	0.546291	4.85098	6.12148	3.22907	4.50055	3.52073	1.09681	20	MS2 targeting
M1625	1.57296	-3.31956	-1.62559	1.79677	0.683948	-6.13898	1.74822	-1.97325	-0.210827	20	MS2 targeting
M1626	-0.502259	-1.87772	-6.13898	-0.605504	-2.96659	-2.77542	0.14691	-2.51857	-1.18733	20	MS2 targeting
M1627	1.66396	-1.17116	0.202186	2.52883	-1.0919	-2.77542	2.40969	-1.57845	3.32192	20	MS2 targeting
M1628	3.97818	0.178694	-0.439758	4.06731	6.94478	4.39099	4.00106	5.14755	-1.18733	20	MS2 targeting
M1629	4.15442	3.39274	3.17007	4.05673	1.99821	8.00869	3.7754	3.06197	5.76001	20	MS2 targeting
M1630	5.61128	7.13439	6.57055	5.59682	7.70624	8.37469	5.3582	7.45656	8.1689	20	MS2 targeting
M1631	4.9377	4.90782	6.13241	4.55088	2.39126	0.895536	4.56051	4.48411	6.3673	20	MS2 targeting
M1632	4.538	8.17737	3.97408	4.31157	0.683948	2.72409	4.11023	5.12121	5.32038	20	MS2 targeting
M1633	6.19065	4.8271	6.49491	6.19678	6.58681	7.45771	5.93677	5.6472	6.52539	20	MS2 targeting
M1634	6.53734	7.41437	7.52909	6.41335	10.9338	9.63031	6.36898	9.46337	8.30111	20	MS2 targeting
M1635	5.2978	3.93712	7.1216	5.31439	7.98022	4.18678	5.56007	6.28266	2.89732	20	MS2 targeting
M1636	3.24461	3.10629	0.546291	3.27202	-1.49246	-0.312258	3.52032	-2.51857	1.41683	20	MS2 targeting
M1637	5.26496	2.8552	0.983169	4.86469	8.24053	1.4068	5.01675	5.86524	4.81041	20	MS2 targeting
M1638	3.56104	0.284317	8.86316	3.60173	3.78414	6.16488	3.47806	-1.57845	-1.18733	20	MS2 targeting
M1639	4.51199	2.04997	1.12657	4.66672	4.94128	6.25731	4.62583	3.24388	6.92658	20	MS2 targeting
M1640	5.49835	1.8234	8.97815	5.35813	5.93559	0.674976	5.17987	4.45277	4.72026	20	MS2 targeting
M1641	3.44852	7.06754	9.81498	3.55739	1.19469	4.45311	3.93387	1.45403	-0.210827	20	MS2 targeting
M1642	1.38703	-6.13898	-1.62559	1.64965	-2.96659	-2.77542	1.46637	-3.40579	-3.05384	20	MS2 targeting
M1643	2.83309	1.32622	-2.17931	3.24431	-1.49246	3.16688	2.84165	0.0790259	-1.58691	20	MS2 targeting
M1644	3.99079	-0.343804	4.75903	3.955	1.57114	2.29078	4.14576	2.4713	1.02332	20	MS2 targeting
M1645	3.26966	-1.48161	1.257	2.88635	-0.778722	0.550611	3.19988	1.22583	0.242128	20	MS2 targeting
M1646	5.20777	5.47453	3.3268	5.36028	5.64556	3.10189	5.24558	5.20198	3.17694	20	MS2 targeting
M1647	5.15047	5.07537	5.20114	4.91973	7.01624	5.27733	5.14788	5.80652	8.18479	20	MS2 targeting
M1648	3.76274	1.78792	3.87599	4.14427	3.45063	4.16574	4.26488	3.57025	7.97543	20	MS2 targeting
M1649	6.15019	9.45709	7.41671	6.00787	8.61915	8.2225	6.24845	7.67149	6.76688	20	MS2 targeting
M1650	3.98071	-1.87772	-2.17931	4.01908	-0.521553	-0.0935013	3.66295	-0.442901	0.242128	20	MS2 targeting
M1651	4.29934	4.73229	0.983169	4.51075	-0.303365	1.83776	4.68089	1.01311	2.22909	20	MS2 targeting
M1652	3.88937	-1.17116	-2.17931	3.25361	1.91363	3.58663	3.99508	-0.442901	-3.05384	20	MS2 targeting
M1653	4.42731	5.51035	2.2211	3.96352	2.59511	6.74975	4.16187	4.46852	6.83692	20	MS2 targeting
M1654	4.45306	4.89953	6.4833	4.1715	4.65902	5.15452	4.82103	4.90665	6.42552	20	MS2 targeting
M1655	3.98576	2.34673	3.88611	3.92332	1.45624	3.07956	3.69651	9.43709	-1.18733	20	MS2 targeting
M1656	3.91341	4.80064	6.03122	3.79553	6.161	5.60112	3.94011	2.27021	-0.400092	20	MS2 targeting
M1657	4.939	4.68967	6.29307	4.62973	8.84648	5.80882	5.01084	7.30684	4.57992	20	MS2 targeting
M1658	5.69149	5.28395	7.49563	5.28863	6.66004	7.72559	5.66927	7.72877	8.66733	20	MS2 targeting
M1659	5.08611	7.56803	5.11346	4.93714	4.8979	1.0868	5.06323	5.01792	5.63297	20	MS2 targeting
M1660	4.21801	7.10946	4.36247	4.53191	5.57503	0.0964108	4.60635	6.84307	5.21704	20	MS2 targeting
M1661	1.96938	-1.87772	-2.17931	1.99819	-0.778722	-6.13898	1.46637	5.92356	4.32854	20	MS2 targeting
M1662	3.9187	3.67111	5.98491	4.19098	2.4525	6.38799	4.0306	4.44217	6.26937	20	MS2 targeting
M1663	2.64166	2.16506	0.644891	2.88036	-0.303365	-0.884567	2.9195	4.84763	4.71443	20	MS2 targeting
M1664	4.43287	5.80472	2.18878	4.72133	6.19946	1.25566	4.45116	5.21761	7.22792	20	MS2 targeting
M1667	5.65393	7.01288	8.08687	5.22862	6.93274	7.92349	5.42089	6.34517	4.84814	20	MS2 targeting
M1668	3.1578	-6.13898	-1.62559	2.76811	2.91091	-2.77542	2.66457	-6.13898	-3.05384	20	MS2 targeting
M1669	3.81757	4.80508	3.63339	4.2102	-2.04891	0.789467	3.79962	7.18497	0.366216	20	MS2 targeting
M1670	2.34433	4.3799	0.737182	2.50568	3.88755	-0.884567	2.3264	3.70937	3.96627	20	MS2 targeting
M1671	3.98323	4.09061	4.79705	3.68653	4.50132	-0.0935013	3.81668	5.44169	7.63344	20	MS2 targeting
M1672	4.2094	-0.69897	4.37689	4.17883	2.35964	-0.884567	4.3423	4.95219	2.38392	20	MS2 targeting
M1674	4.91671	3.81906	6.0827	4.84331	4.84179	2.21085	4.89998	7.24185	8.70675	20	MS2 targeting
M1676	4.35697	3.4045	5.0519	4.16904	5.10279	6.33242	3.3759	4.0882	6.95651	20	MS2 targeting
M1677	5.1639	2.67272	4.8651	5.18192	2.4525	1.47683	5.15057	6.89549	5.89233	20	MS2 targeting
M1678	7.09387	9.66496	7.63709	7.03828	8.33502	7.891	7.04696	8.386	7.83683	20	MS2 targeting
M1679	5.67752	7.21424	7.20981	5.54288	5.6521	6.3158	5.50747	6.74081	3.59986	20	MS2 targeting
M1680	4.28507	6.65747	0.202186	4.44331	5.28217	2.21085	3.82007	4.45277	0.864037	20	MS2 targeting
M1681	3.99079	3.46191	0.202186	3.44018	3.48034	2.69501	3.98305	1.97899	0.777277	20	MS2 targeting
M1682	4.3859	2.76684	5.58014	4.21258	2.99565	8.17458	4.23728	1.75746	2.91774	20	MS2 targeting
M1683	2.62234	0.720459	-6.13898	3.07116	-2.96659	6.38572	2.51376	1.49564	0.366216	20	MS2 targeting
M1684	0.0918576	-1.48161	-6.13898	-0.822715	-2.96659	-1.84726	0.189435	4.09498	-1.58691	20	MS2 targeting
M1685	1.51826	0.993931	-2.17931	2.03099	-6.13898	-1.28706	0.850195	-2.51857	0.480471	20	MS2 targeting
M1686	2.18665	-0.343804	-0.65753	2.43391	0.0535801	-0.312258	2.39159	1.27445	-1.58691	20	MS2 targeting
M1687	1.00476	-1.87772	-0.65753	0.912344	0.0535801	0.550611	0.711175	-1.26881	-0.617989	20	MS2 targeting
M1688	0.454321	-0.915834	-0.914121	0.935628	3.11409	-0.312258	0.0579045	2.85376	-0.400092	20	MS2 targeting
M1689	3.42641	2.10866	0.326233	3.53088	3.60694	1.94046	2.91318	0.0790259	0.586337	20	MS2 targeting
M1690	4.43472	2.67272	3.35621	4.36185	2.26039	6.54903	4.2549	6.0265	3.45365	20	MS2 targeting
M1692	3.00208	1.42191	-0.914121	2.61788	4.72875	2.83489	3.01717	-1.57845	-2.14144	20	MS2 targeting
M1693	3.49175	5.30919	2.93698	3.48032	4.65251	0.414504	3.55732	0.461482	-1.58691	20	MS2 targeting
M1694	4.76932	6.24168	4.1354	4.86772	5.04929	2.86131	4.99444	1.17552	1.5795	20	MS2 targeting
M1695	5.35842	6.44897	2.85696	5.39114	3.35765	5.69224	5.45615	3.10293	2.57607	20	MS2 targeting
M1696	6.88951	3.68082	6.76258	6.66829	8.33452	3.8599	6.91776	7.19999	8.75082	20	MS2 targeting
M1697	4.54315	5.41182	4.60221	4.81534	6.58168	2.63502	4.81595	6.29744	0.586337	20	MS2 targeting
M1698	8.2641	9.28504	8.70397	8.2671	9.52671	10.0437	8.43214	7.79796	8.35687	20	MS2 targeting
M1699	2.45768	1.98878	2.50981	2.21351	1.72797	0.264207	2.58716	1.88818	2.83425	20	MS2 targeting
M1700	5.13579	3.33245	2.53574	5.2239	6.95672	5.52466	5.43863	1.01311	3.39658	20	MS2 targeting
M1701	2.93579	1.71423	1.97798	3.30815	-2.96659	6.3993	2.84165	1.17552	3.12518	20	MS2 targeting
M1702	3.81473	8.2382	4.51365	4.26867	2.51124	1.83776	4.19355	-1.26881	4.28989	20	MS2 targeting
M1703	0.0918576	-0.343804	-0.0833721	0.344455	-2.04891	0.674976	-0.0868313	-0.797542	-6.13898	20	MS2 targeting
M1704	4.30541	3.46191	0.737182	4.50297	2.29424	6.80183	4.43579	1.36703	3.05315	20	MS2 targeting
M1705	1.11945	-6.13898	-2.17931	0.683928	-6.13898	0.895536	0.230742	1.97899	-3.05384	20	MS2 targeting
M1706	0.566404	-6.13898	-0.914121	0.935628	-6.13898	0.895536	0.14691	1.85659	-0.874753	20	MS2 targeting
M1707	4.50321	1.37486	5.42923	4.22445	4.55815	6.50153	4.36103	5.15407	4.91571	20	MS2 targeting
M1708	6.62933	5.23538	7.74523	6.42831	9.39228	8.66917	6.67095	7.49297	7.37089	20	MS2 targeting
M1709	3.74498	6.08789	3.87599	3.81449	4.55117	3.03383	3.59735	5.29917	-0.0435375	20	MS2 targeting
M1710	4.045	3.719	3.03114	3.89093	4.15956	0.264207	4.11023	4.54483	1.62989	20	MS2 targeting
M1711	4.6408	3.42774	2.70527	4.52233	1.82378	0.789467	4.4068	4.83957	2.09202	20	MS2 targeting
M1712	5.4462	-0.194401	3.64535	5.59316	5.46417	6.27462	5.3359	3.82812	5.17099	20	MS2 targeting
M1713	4.69575	4.84447	0.546291	4.34456	-0.521553	6.16753	4.2599	2.66608	4.68494	20	MS2 targeting
M1714	4.59031	-1.17116	-0.250588	4.33584	6.42245	7.91721	3.93699	4.76497	2.95774	20	MS2 targeting
M1715	3.89206	3.00177	-2.17931	3.75029	3.87642	2.43847	3.34331	6.89258	-0.874753	20	MS2 targeting
M1716	4.86832	5.31855	0.737182	4.62078	4.82452	1.83776	4.2599	2.4713	4.73184	20	MS2 targeting
M1717	5.1572	5.70837	2.81522	5.25894	4.20475	6.00227	5.0618	3.38341	4.70858	20	MS2 targeting
M1718	4.73825	8.8567	7.24952	5.12609	0.961805	8.86181	4.34701	4.12843	0.480471	20	MS2 targeting
M1719	2.72251	6.70342	-1.22644	2.27869	-1.49246	-2.77542	2.75936	7.06486	-0.874753	20	MS2 targeting
M1721	1.59955	-2.42555	-6.13898	1.62121	3.62035	-1.28706	1.37721	-2.51857	0.864037	20	MS2 targeting
M1722	2.58955	3.51712	-3.08945	1.79677	-6.13898	1.25566	2.30722	4.97444	-0.210827	20	MS2 targeting
M1723	1.61266	3.32009	0.326233	1.73175	3.34155	-2.77542	1.41354	0.62038	-2.14144	20	MS2 targeting
M1724	1.80773	3.60129	0.644891	1.7049	3.46556	-2.77542	1.58261	0.28289	-3.05384	20	MS2 targeting
M1725	3.36574	5.19193	-2.17931	3.06061	4.14108	-2.77542	3.62085	1.17552	2.52373	20	MS2 targeting
M1727	3.73302	1.0549	3.20281	3.77309	4.05485	-0.884567	3.58943	1.79127	2.76829	20	MS2 targeting
M1728	2.48646	-0.343804	-2.17931	2.35839	0.0535801	-1.84726	1.87087	-2.51857	-3.05384	20	MS2 targeting
M1729	4.54998	5.33708	2.12188	4.32265	1.45624	4.03258	4.52359	4.40444	2.26141	20	MS2 targeting
M1730	1.85264	-0.059029	-1.22644	2.47422	-2.04891	0.0964108	2.238	4.39896	1.47312	20	MS2 targeting
M1731	4.90875	7.08409	5.05638	5.02253	4.59256	6.53063	5.0197	9.78129	2.12753	20	MS2 targeting
M1732	4.8765	5.36142	8.35972	5.28636	4.8303	7.81616	5.24306	4.58393	8.3489	20	MS2 targeting
M1733	2.88806	2.0197	-0.914121	2.72199	4.61282	-0.884567	2.88758	-2.51857	8.87516	20	MS2 targeting
M1735	4.31145	4.02355	8.33501	4.69087	6.46022	-0.312258	4.34466	4.82332	2.38392	20	MS2 targeting
M1736	3.22766	-1.48161	-2.17931	3.28567	0.961805	-0.570217	3.16833	1.79127	0.106354	20	MS2 targeting
M1737	2.02929	-1.17116	1.37661	2.12514	3.69826	6.71214	2.37327	-1.01402	4.69089	20	MS2 targeting
M1738	1.17355	-3.31956	-0.439758	1.66367	-2.96659	-1.84726	0.952505	-3.40579	-3.05384	20	MS2 targeting
M1740	3.90811	5.77104	2.28365	3.72044	6.53467	4.48744	3.85351	5.83517	1.35825	20	MS2 targeting
M1741	2.67329	-1.17116	7.58837	3.20173	3.52379	-2.77542	2.99337	-6.13898	3.64956	20	MS2 targeting
M1742	3.33045	4.03873	-1.22644	3.40725	4.85885	5.75347	3.49087	1.85659	4.62409	20	MS2 targeting
M1743	3.53372	-1.48161	7.63634	3.96352	3.09501	1.1737	3.98002	-0.158463	0.864037	20	MS2 targeting
M1744	2.68576	2.04997	4.70863	2.6674	4.98338	-0.0935013	3.08068	-2.51857	-3.05384	20	MS2 targeting
M1745	1.70127	4.33144	-3.08945	1.16964	-6.13898	5.2476	0.976988	-6.13898	-3.05384	20	MS2 targeting
M1746	3.16227	2.13714	1.73103	3.35639	-2.04891	-1.28706	3.13064	-0.158463	5.85839	20	MS2 targeting
M1747	6.60534	6.86218	7.603	6.57546	8.19925	7.9545	6.50304	7.00309	9.65405	20	MS2 targeting
M1748	9.96344	11.8391	12.9021	10.0051	12.0695	12.3739	9.88806	11.9723	11.9185	20	MS2 targeting
M1749	4.0761	6.77652	6.15768	4.1837	0.683948	1.33321	4.08229	5.55918	-0.874753	20	MS2 targeting
M1750	5.35257	6.89381	6.36172	5.64176	4.23992	5.78831	5.52314	5.18301	7.71958	20	MS2 targeting
M1751	3.9187	-0.915834	3.66897	3.65881	0.961805	4.11174	4.0306	1.85659	3.8752	20	MS2 targeting
M1752	3.01201	5.10089	4.61443	3.04998	0.203609	-1.28706	2.90682	4.04681	-1.18733	20	MS2 targeting
M1753	5.31896	4.08331	4.49394	5.36458	0.578013	-0.570217	4.20913	-1.57845	-1.18733	20	MS2 targeting
M1754	3.9933	2.61315	0.202186	4.91535	7.51496	3.05688	3.84022	10.2222	-0.0435375	20	MS2 targeting
M1755	1.51826	-6.13898	-2.17931	1.31877	-1.49246	-1.84726	1.55034	3.42707	-6.13898	20	MS2 targeting
M1756	1.86365	2.27165	4.31084	1.79677	5.90579	2.25137	1.43137	6.87888	3.27519	20	MS2 targeting
M1757	3.88126	9.10462	6.01978	3.80504	3.01607	1.98919	3.46081	7.54777	3.08962	20	MS2 targeting
M1758	6.25113	8.74464	7.63634	6.19014	5.47896	2.54009	6.00011	7.10069	2.55014	20	MS2 targeting
M1759	1.81909	-1.17116	-3.08945	1.69129	1.04368	3.12388	2.43642	1.0693	-2.14144	20	MS2 targeting
M1760	7.06494	10.5143	10.0733	7.0593	6.86256	11.1045	7.01517	8.80853	8.55038	20	MS2 targeting
M1761	7.54281	10.3116	10.0669	7.36635	7.66237	10.5041	7.46908	9.52432	10.4323	20	MS2 targeting
M1762	2.26349	2.71111	1.37661	2.34106	1.99821	7.77506	2.16529	4.78188	1.67858	20	MS2 targeting
M1763	5.83338	7.63133	4.80773	5.67413	2.35964	8.3156	5.4507	5.24226	5.64527	20	MS2 targeting
M1764	3.03167	-0.69897	-0.250588	3.1628	2.56769	2.63502	3.05216	-1.01402	7.63575	20	MS2 targeting
M1765	3.58785	0.284317	-1.62559	3.85475	2.67436	2.66533	3.67048	3.01981	7.58557	20	MS2 targeting
M1766	1.34049	-6.13898	-3.08945	1.48581	3.49497	-2.77542	1.22199	-2.51857	-2.14144	20	MS2 targeting
M1767	-0.29214	-6.13898	-3.08945	0.378837	-2.96659	2.08198	-0.0369551	-6.13898	-6.13898	20	MS2 targeting
M1770	0.30074	-2.42555	-3.08945	0.118948	-2.96659	-1.84726	0.230742	-0.293683	-3.05384	20	MS2 targeting
M1772	2.49357	-6.13898	5.13482	2.65343	-2.96659	-0.570217	2.34533	-0.0348371	4.56057	20	MS2 targeting
M1774	1.13771	-6.13898	-6.13898	1.38792	-6.13898	-1.28706	1.04804	2.09181	4.69089	20	MS2 targeting
M1775	0.164897	-2.42555	1.257	0.309234	-2.96659	-6.13898	0.850195	1.72284	-6.13898	20	MS2 targeting
M1776	2.46493	5.44066	-3.08945	2.55913	-2.96659	3.89869	2.687	-1.97325	-6.13898	20	MS2 targeting
M1777	1.06324	-3.31956	-1.62559	0.864619	5.1727	-2.77542	0.557318	-6.13898	-6.13898	20	MS2 targeting
M1779	3.20186	5.80249	3.34158	2.86225	6.59022	-0.0935013	3.30515	4.48411	5.14524	20	MS2 targeting
M1780	2.28002	1.27589	-0.914121	2.11497	-2.04891	-0.884567	2.3264	2.51241	2.60155	20	MS2 targeting
M1781	6.1126	9.32408	7.58527	6.10734	9.20812	7.55298	6.20183	5.39848	10.2028	20	MS2 targeting
M1783	4.81542	5.33708	6.35446	4.85557	4.14108	11.0162	4.68089	0.830068	6.89216	20	MS2 targeting
M1784	5.82566	8.03472	6.93447	5.8134	9.29376	7.73276	5.81813	6.51664	8.78283	20	MS2 targeting
M1785	6.04528	6.70223	8.02757	5.80078	7.89799	8.85813	6.15633	6.00685	8.42667	20	MS2 targeting
M1786	5.45714	8.06838	7.0693	5.74997	5.90579	10.3834	5.85657	6.8238	6.98219	20	MS2 targeting
M1787	3.55765	4.83581	5.00626	3.3947	2.26039	6.33713	3.89264	5.37638	3.78913	20	MS2 targeting
M1788	1.91748	2.07961	7.59378	2.1749	3.63363	4.99067	2.57117	9.64797	-0.617989	20	MS2 targeting
M1789	0.984721	0.284317	-0.250588	0.912344	0.463678	2.69501	0.850195	1.68737	5.54051	20	MS2 targeting
M1790	5.66735	8.57807	6.94539	5.79761	7.54514	6.59502	5.94222	8.06305	7.18854	20	MS2 targeting
M1791	5.54784	4.76914	9.13029	5.53528	8.93329	9.01528	5.51272	6.87495	6.03706	20	MS2 targeting
M1792	6.70781	8.09992	5.78861	6.77581	9.51868	7.84954	6.85268	8.91155	7.43429	20	MS2 targeting
M1793	5.81293	7.1467	3.65721	5.25547	6.20615	6.30381	5.72182	6.15053	5.25767	20	MS2 targeting
M1794	5.32196	10.0243	4.2573	5.13743	7.16543	7.44903	5.0197	5.7878	5.69346	20	MS2 targeting
M1795	3.57785	4.20935	0.440453	3.1329	2.19021	0.264207	3.11969	5.20198	-0.0435375	20	MS2 targeting
M1797	5.08494	6.88754	7.78834	5.0266	4.23992	3.05688	5.05607	8.39805	2.85558	20	MS2 targeting
M1798	2.39074	-0.915834	-1.62559	2.11497	2.9539	1.1737	2.12204	-1.01402	-2.14144	20	MS2 targeting
M1799	1.13771	-3.31956	-1.62559	0.445235	1.77667	-0.570217	0.7684	1.53608	-1.58691	20	MS2 targeting
M1800	1.73763	5.51578	6.51461	2.19434	-2.96659	0.0964108	1.6297	-3.40579	-1.18733	20	MS2 targeting
M1801	1.66396	5.49393	6.47327	2.00921	-0.303365	1.0868	1.73393	-1.26881	0.684964	20	MS2 targeting
M1802	2.71037	-0.69897	0.546291	2.52115	-1.0919	0.550611	2.24809	-0.293683	-1.58691	20	MS2 targeting
M1803	4.51199	6.53308	1.31805	4.66324	5.4863	1.47683	4.20396	6.53047	-0.0435375	20	MS2 targeting
M1804	4.87514	5.42053	4.94951	4.73467	9.23479	-0.0935013	4.43579	2.90098	6.20227	20	MS2 targeting
M1807	2.22131	2.97046	-2.17931	2.45017	-2.96659	-6.13898	2.56311	3.62752	-0.874753	20	MS2 targeting
M1808	4.14768	8.6832	8.1433	3.34339	8.88655	2.98661	3.99808	2.42897	2.49683	20	MS2 targeting
M1810	4.91406	2.55101	7.42974	4.16166	5.1405	6.66792	4.54626	5.63328	5.89491	20	MS2 targeting
M1811	7.01241	9.32234	8.71465	6.77662	9.79085	10.3466	6.78193	8.89074	7.20005	20	MS2 targeting
M1812	5.03467	7.98712	6.8633	4.57332	7.36675	6.77081	4.85114	8.13187	6.43971	20	MS2 targeting
M1813	4.91935	3.32009	6.00129	4.94577	1.19469	9.79762	4.61027	8.68443	7.29972	20	MS2 targeting
M1814	4.6117	7.15716	5.63515	4.75445	6.66166	4.96043	4.52359	5.82704	4.73184	20	MS2 targeting
M1815	5.68219	6.51962	6.37075	5.27728	6.51327	9.52476	5.47776	4.59832	6.33918	20	MS2 targeting
M1816	5.85699	7.39017	7.67478	5.85902	8.38644	5.28711	5.83162	8.15721	5.22526	20	MS2 targeting
M1817	4.55508	7.19997	1.85978	4.6615	2.67436	3.26908	4.6374	7.81808	2.44148	20	MS2 targeting
M1818	5.33784	6.48404	7.87087	5.62931	6.29451	6.87172	5.53762	5.82296	7.93654	20	MS2 targeting
M1819	5.73262	7.66105	5.83634	5.88691	5.31139	7.83044	6.04422	6.06155	5.22526	20	MS2 targeting
M1820	4.80974	6.76402	4.2178	4.73301	4.44969	4.16574	4.792	5.38747	4.12401	20	MS2 targeting
M1821	4.02061	2.95455	3.13657	4.14177	2.9539	2.12623	4.34935	5.73232	4.54095	20	MS2 targeting
M1822	3.78028	3.77443	5.31782	4.39583	4.7472	3.07956	4.65836	5.57139	3.78913	20	MS2 targeting
M1823	5.57154	4.4722	7.90919	5.96112	3.53798	5.02613	6.14557	8.23834	7.56952	20	MS2 targeting
M1824	4.76932	4.80508	6.0827	4.6994	6.71261	4.83274	4.93788	0.893697	6.22704	20	MS2 targeting
M1825	6.05432	8.04462	6.15768	6.25982	5.80667	5.73216	6.23836	5.11789	8.08051	20	MS2 targeting
M1826	6.32668	7.36632	6.87984	6.32574	8.7058	6.12728	6.54714	6.79076	5.56661	20	MS2 targeting
M1827	6.81983	7.44459	5.86986	6.88972	6.33572	6.99467	6.89986	6.33661	5.85575	20	MS2 targeting
M1828	5.3555	4.56421	2.31393	5.42957	3.89859	4.16574	5.52106	6.67895	6.53203	20	MS2 targeting
M1829	7.39741	8.5004	5.41881	7.42896	8.98342	4.19719	7.47473	8.4316	7.37366	20	MS2 targeting
M1830	6.699	9.24595	9.27418	6.74237	7.80273	8.15869	7.09877	9.08384	8.19894	20	MS2 targeting
M1831	6.92477	9.22143	9.39929	6.88113	8.73266	7.27079	7.18208	8.07597	8.16783	20	MS2 targeting
M1832	5.85216	9.29653	8.13537	5.96466	8.51086	8.28421	6.05216	6.04588	5.06967	20	MS2 targeting
M1833	3.32249	0.561455	6.78438	3.67965	3.43554	7.96672	3.61696	4.18675	4.4597	20	MS2 targeting
M1834	4.15442	3.13481	7.4202	4.05141	3.69826	3.20863	4.23981	0.830068	6.38024	20	MS2 targeting
M1835	1.62566	-3.31956	1.37661	1.02518	-2.96659	4.59368	1.50055	-1.97325	4.97539	20	MS2 targeting
M1838	4.61333	-0.915834	2.68224	4.64922	8.02563	4.94816	4.55645	4.75644	6.15359	20	MS2 targeting
M1839	4.35307	5.60513	4.82886	4.4873	2.67436	-1.28706	4.50266	3.74431	1.5795	20	MS2 targeting
M1840	3.70268	-1.17116	7.07151	4.00539	-0.113881	7.53872	3.78583	4.34876	6.82886	20	MS2 targeting
M1841	4.2582	8.37972	2.40115	3.96918	3.65983	7.20527	4.18307	1.36703	6.97246	20	MS2 targeting
M1842	5.66262	10.099	7.32117	5.73346	5.59554	8.93904	5.73803	4.93339	6.28911	20	MS2 targeting
M1843	2.93579	1.42191	-1.22644	3.36928	5.68118	-0.570217	3.18944	2.31738	-3.05384	20	MS2 targeting
M1844	5.26392	5.96817	6.1493	5.23685	6.19946	6.45675	5.16796	6.68795	5.48342	20	MS2 targeting
M1845	5.76013	6.55038	8.14646	5.79999	6.09051	5.89446	5.90682	7.53411	7.94776	20	MS2 targeting
M1846	4.17445	0.793838	4.91535	3.81449	1.26466	5.44829	4.36567	3.37228	-1.18733	20	MS2 targeting
M1847	5.89304	8.35947	6.81514	5.97664	5.09321	5.95091	5.87216	5.29329	7.22383	20	MS2 targeting
M1848	5.48594	6.28209	2.31393	5.63998	6.82108	5.28711	5.45615	8.00391	4.35874	20	MS2 targeting
M1849	6.29399	6.39546	6.79381	6.16018	6.81526	5.39051	6.26408	4.30263	5.48684	20	MS2 targeting
M1850	9.45659	10.8088	10.8991	9.44271	10.9354	10.74	9.52882	10.272	10.8576	20	MS2 targeting
M1851	6.99248	8.34696	7.88733	7.14576	7.69678	9.46033	7.16387	8.40864	7.57516	20	MS2 targeting
M1852	7.02993	7.70333	8.39645	6.95883	7.66883	5.88484	7.03717	8.43428	6.96266	20	MS2 targeting
M1853	5.05883	7.7063	7.52748	5.28975	5.28217	6.7864	5.38131	5.64257	7.22792	20	MS2 targeting
M1854	5.10943	6.44897	5.0474	5.20006	3.7357	6.72838	5.3698	6.10421	5.27361	20	MS2 targeting
M1855	5.74309	6.29479	6.81911	5.79602	3.87642	6.0998	5.73624	4.7986	6.40396	20	MS2 targeting
M1856	7.21785	7.418	7.73547	6.92868	2.88893	8.0602	6.95289	8.6112	6.53038	20	MS2 targeting
M1857	6.10682	5.12952	4.88036	6.34381	4.21363	9.69141	6.31778	6.84709	9.79528	20	MS2 targeting
M1858	7.38074	8.48836	8.03383	7.27774	6.11912	3.92397	6.9887	8.53935	10.0725	20	MS2 targeting
M1859	7.81656	7.68114	8.48021	7.55811	8.17845	10.7053	7.5706	6.8916	8.86138	20	MS2 targeting
M1860	8.42967	8.31343	7.67623	8.33242	8.08485	7.4304	8.15527	7.30611	8.94119	20	MS2 targeting
M1861	8.00908	7.03669	6.1472	7.77027	8.24432	7.67436	7.72651	8.44891	7.95642	20	MS2 targeting
M1862	6.1558	5.51578	4.48065	6.2307	5.15899	5.71052	5.90123	6.41731	3.15989	20	MS2 targeting
M1863	4.4567	6.39103	6.09584	4.30264	5.46417	1.33321	4.01886	4.8436	4.69681	20	MS2 targeting
M1864	7.9679	8.20832	7.54114	7.80663	8.01869	7.56207	7.59032	9.93061	7.7752	20	MS2 targeting
M1865	6.01905	3.46191	4.99228	5.944	5.26947	5.0721	5.85079	7.5453	5.52395	20	MS2 targeting
M1866	2.44307	5.82892	-3.08945	2.46625	0.683948	-0.884567	2.3547	-2.51857	5.04667	20	MS2 targeting
M1867	1.66396	0.561455	-1.62559	2.40918	-2.04891	-0.0935013	1.79028	-1.97325	-1.58691	20	MS2 targeting
M1869	4.31747	2.82051	6.85945	4.39162	5.07385	0.264207	4.21429	3.92267	2.35425	20	MS2 targeting
M1870	6.52265	9.8532	4.67984	6.5322	7.30063	6.98569	6.36144	5.62861	6.03706	20	MS2 targeting
M1871	4.04258	0.993931	2.87738	4.18127	3.57975	2.98661	4.09073	2.8214	2.76829	20	MS2 targeting
M1872	2.19539	3.39274	1.68542	2.64639	-1.0919	0.674976	3.15766	3.18151	4.12401	20	MS2 targeting
M1873	4.07374	4.14069	3.31187	3.69678	5.98565	7.03294	4.1725	-0.609351	1.8584	20	MS2 targeting
M1874	0.394836	-3.31956	-6.13898	-0.249873	-6.13898	-6.13898	0.651586	-6.13898	-3.05384	20	MS2 targeting
M1875	1.76138	-3.31956	-0.439758	2.04176	-2.96659	2.43847	2.41866	-0.442901	-3.05384	20	MS2 targeting
M1876	3.3185	0.720459	6.66022	2.99008	4.10339	9.53582	3.68169	5.06359	6.46248	20	MS2 targeting
M1877	1.63854	-0.059029	-6.13898	1.45391	-2.04891	-2.77542	1.50055	-0.0348371	-6.13898	20	MS2 targeting
M1878	3.54402	8.49937	4.67402	4.09859	0.463678	4.35426	3.99508	2.24604	-0.400092	20	MS2 targeting
M1879	4.30743	4.11229	7.1762	4.53382	5.07872	7.63566	4.90477	5.36239	7.67902	20	MS2 targeting
M1880	5.95549	9.11629	8.3898	6.20099	7.18586	8.32809	6.7854	9.29206	8.87744	20	MS2 targeting
M1881	5.36037	9.45885	4.40529	5.35813	6.36985	8.63608	5.70727	6.05635	1.94055	20	MS2 targeting
M1882	4.45124	9.25592	8.43786	4.50881	5.30725	5.72138	4.79545	6.68233	6.34107	20	MS2 targeting
M1883	3.38115	-0.510485	2.61085	3.07641	4.54415	1.33321	3.60523	5.99964	1.23345	20	MS2 targeting
M1884	2.50064	-0.915834	2.58624	2.52883	2.74948	1.25566	2.58716	0.693715	-1.58691	20	MS2 targeting
M1885	2.19539	5.40305	-0.65753	1.08887	4.95721	-2.77542	1.55034	4.36007	-3.05384	20	MS2 targeting
M1886	3.43382	6.31829	2.79389	3.26284	5.05423	-0.0935013	3.46514	4.60784	3.58717	20	MS2 targeting
M1887	3.48106	3.46191	2.42909	2.93337	0.203609	1.94046	3.26097	0.893697	2.69918	20	MS2 targeting
M1888	3.75389	7.25135	4.18541	3.70358	-0.521553	6.38344	4.43137	7.50257	6.10765	20	MS2 targeting
M1889	2.92006	2.80284	0.326233	3.0553	4.89239	0.789467	3.07502	6.91095	6.22294	20	MS2 targeting
M1890	0.566404	-3.31956	-0.439758	0.378837	-1.0919	-0.884567	1.07096	6.71792	-1.18733	20	MS2 targeting
M1892	4.21801	6.08789	5.84155	4.13676	5.2042	-0.0935013	3.96174	5.27249	4.27414	20	MS2 targeting
M1893	3.90011	4.73695	6.10669	3.97481	4.37258	5.85885	3.94632	2.75443	5.0833	20	MS2 targeting
M1894	5.50276	9.68724	8.73262	5.35597	9.34411	7.62413	5.5448	5.65869	6.20643	20	MS2 targeting
M1895	5.21531	7.38647	8.32343	5.05345	8.78159	7.13933	4.9285	5.50927	5.01384	20	MS2 targeting
M1896	6.21396	7.06938	9.57857	5.9084	8.78084	5.40405	5.8232	4.98543	3.57436	20	MS2 targeting
M1897	6.69862	8.91696	7.6453	6.57453	5.78005	8.82537	6.3386	7.04573	9.59859	20	MS2 targeting
M1898	6.38326	8.0022	6.55796	6.36486	5.5081	7.60178	5.70727	3.00548	8.18162	20	MS2 targeting
M1899	4.67402	9.85293	8.66851	4.05407	4.67837	1.4068	3.86339	-0.0348371	1.77129	20	MS2 targeting
M1900	6.35232	9.89588	8.72349	5.92377	4.73493	4.43563	5.82405	7.65092	7.48906	20	MS2 targeting
M1901	2.13305	-1.17116	1.97798	2.54406	7.79314	0.264207	2.5221	-6.13898	-3.05384	20	MS2 targeting
M1902	3.93967	4.77368	4.4537	4.01362	7.30479	0.414504	3.93699	3.89961	-1.18733	20	MS2 targeting
M1903	2.88265	6.42174	2.70527	3.16773	-1.0919	1.60743	3.05791	-1.97325	-1.58691	20	MS2 targeting
M1904	3.92922	5.64037	6.38865	3.64475	3.05608	-0.570217	3.87971	5.6859	3.05315	20	MS2 targeting
M1905	3.36574	0.863665	-3.08945	2.85616	-2.96659	0.0964108	3.7684	0.0790259	1.62989	20	MS2 targeting
M1906	2.79908	-1.17116	6.99997	2.44207	-1.49246	-0.884567	1.95954	-1.97325	0.586337	20	MS2 targeting
M1907	6.65373	10.1807	7.75492	6.0344	4.38048	8.00795	6.13269	6.84004	8.52979	20	MS2 targeting
M1908	5.9471	7.16064	8.54668	5.31439	2.48217	8.12365	5.30842	6.88672	2.60155	20	MS2 targeting
M1909	4.55508	9.35073	3.3268	4.50102	0.463678	3.55461	4.54422	1.68737	7.87585	20	MS2 targeting
M1910	5.477	3.53863	3.91603	5.00337	1.39516	7.93442	4.75709	4.64991	10.0598	20	MS2 targeting
M1911	5.18161	7.64441	5.90261	4.8122	1.12116	8.19938	4.91431	2.29399	6.80849	20	MS2 targeting
M1912	6.47003	9.691	6.37075	6.22008	5.39955	8.67291	6.23202	3.25604	9.67107	20	MS2 targeting
M1913	5.7594	8.56274	4.20169	5.5495	3.56596	10.2441	5.49693	6.29303	6.64966	20	MS2 targeting
M1914	4.01074	5.35234	4.19357	3.95215	7.39432	0.994338	3.74008	5.50927	2.12753	20	MS2 targeting
M1915	4.11118	0.793838	-1.62559	3.3607	2.22573	-0.312258	3.2154	2.8214	-6.13898	20	MS2 targeting
M1916	5.24299	7.27397	5.14749	5.35273	7.99702	2.36651	5.11378	5.70154	3.59986	20	MS2 targeting
M1917	5.72207	5.87825	5.49679	5.62036	6.19275	8.3162	5.55805	6.06501	4.95577	20	MS2 targeting
M1918	4.91935	5.28713	3.62133	5.11211	6.36985	4.64781	4.7659	4.30263	8.44042	20	MS2 targeting
M1919	3.27379	3.58071	4.48065	3.52705	4.67837	4.97865	3.40776	4.83552	3.2269	20	MS2 targeting
M1920	4.587	3.50625	2.4565	4.28689	-0.778722	5.67745	4.59651	1.79127	4.1673	20	MS2 targeting
M1921	2.34433	3.20374	1.31805	1.99819	4.5229	3.43658	1.92221	4.80275	3.68574	20	MS2 targeting
M1922	2.13305	2.29711	1.85978	1.95326	8.02059	5.13841	1.6297	-1.26881	-2.14144	20	MS2 targeting
M1923	5.08494	2.46377	4.87021	4.99647	3.55204	3.73688	4.65268	2.3404	5.39876	20	MS2 targeting
M1924	5.67205	6.65378	2.61085	5.63998	7.46661	4.43563	5.49904	6.03534	2.69918	20	MS2 targeting
M1925	3.54402	3.10629	3.38502	3.36499	1.86941	0.550611	3.24594	6.36495	4.40288	20	MS2 targeting
M1926	5.75275	6.55303	4.74242	5.4898	2.72487	7.76723	5.73982	2.86967	4.43865	20	MS2 targeting
M1927	3.39639	6.92477	1.85978	4.01088	5.33598	5.5533	3.86339	3.66447	0.777277	20	MS2 targeting
M1928	5.0755	6.80675	4.89045	5.08243	0.578013	6.93684	5.29266	1.94935	7.22177	20	MS2 targeting
M1929	6.27967	7.7933	7.38853	6.28836	6.99066	5.5329	6.54612	6.43211	5.96037	20	MS2 targeting
M1930	2.42831	-1.87772	3.01279	1.88314	-6.13898	-0.884567	2.40969	2.14507	-2.14144	20	MS2 targeting
M1931	3.02187	-0.194401	3.01279	2.40084	2.26039	-1.28706	3.1031	4.44217	0.106354	20	MS2 targeting
M1932	0.790671	-3.31956	-1.62559	1.48581	0.683948	0.550611	1.18043	-0.0348371	-2.14144	20	MS2 targeting
M1933	5.93997	4.68002	5.82061	5.94328	8.34364	3.94883	5.82742	5.2665	7.94092	20	MS2 targeting
M1934	3.13526	0.561455	3.2189	2.94489	2.8666	5.3584	2.45397	1.75746	-3.05384	20	MS2 targeting
M1935	5.32395	6.5818	2.58624	5.23215	5.6124	1.66855	5.24306	4.56451	4.54752	20	MS2 targeting
M1936	4.73675	2.50805	0.0664604	4.9429	3.18797	4.80579	4.76238	6.31788	3.98574	20	MS2 targeting
M1937	2.81051	-1.48161	-2.17931	2.86831	-2.04891	0.895536	2.95691	-6.13898	0.106354	20	MS2 targeting
M1938	2.22131	-0.915834	-1.62559	3.01215	-2.04891	-0.884567	2.49693	2.00803	2.32397	20	MS2 targeting
M1939	2.04872	1.32622	-1.62559	1.16964	-2.04891	-6.13898	1.18043	-1.01402	3.0715	20	MS2 targeting
M1940	5.5998	6.79451	7.02307	5.63288	6.22162	8.96363	5.5169	6.63773	6.97733	20	MS2 targeting
M1941	6.72188	9.4629	8.70182	6.59478	9.73611	7.32044	6.52084	8.17813	7.78218	20	MS2 targeting
M1942	4.3413	2.48608	3.96457	4.28235	0.203609	9.3498	4.58261	0.184556	4.96561	20	MS2 targeting
M1943	4.53111	3.719	3.55948	4.64922	1.62533	2.91275	4.28463	0.763502	7.09074	20	MS2 targeting
M1944	4.3744	-0.915834	-1.62559	4.18613	-0.778722	-0.884567	4.27972	-2.51857	-0.0435375	20	MS2 targeting
M1945	6.06807	6.24823	4.41929	6.13777	6.70319	8.69557	6.08491	7.7244	3.17694	20	MS2 targeting
M1946	5.10248	7.79498	9.3042	5.38692	4.91432	2.88726	5.64082	6.74836	3.03457	20	MS2 targeting
M1947	3.54744	2.04997	6.66169	3.5347	1.62533	-0.0935013	3.46946	2.24604	3.4396	20	MS2 targeting
M1948	3.96033	5.41182	-0.914121	3.63412	6.13555	-0.0935013	3.25598	3.79518	6.27136	20	MS2 targeting
M1949	4.91803	6.59982	10.3632	4.66324	7.05624	1.83776	4.45988	3.98242	6.31629	20	MS2 targeting
M1950	3.11236	4.3003	1.97798	3.22081	2.64842	6.58712	2.80109	6.61195	-0.400092	20	MS2 targeting
M1954	2.32055	-6.13898	-1.22644	2.23244	-6.13898	-2.77542	2.07745	-0.797542	-6.13898	20	MS2 targeting
M1955	1.30861	-1.48161	-6.13898	1.5015	-1.0919	-2.77542	1.30169	-0.0348371	0.106354	20	MS2 targeting
M1956	2.90414	-1.87772	1.12657	3.04998	-1.0919	-1.28706	2.80109	-0.158463	-0.874753	20	MS2 targeting
M1957	3.17559	-2.42555	1.68542	3.70697	-2.96659	5.63979	3.52448	-2.51857	0.106354	20	MS2 targeting
M1958	5.16724	3.07719	4.09237	4.93858	6.45087	7.58504	5.08169	-0.609351	9.22295	20	MS2 targeting
M1959	4.03529	1.98878	5.68525	4.04607	6.88633	5.65497	3.88619	2.90098	0.864037	20	MS2 targeting
M1960	3.62391	-1.48161	9.38732	3.55363	6.62887	-0.312258	3.2154	6.21422	-1.18733	20	MS2 targeting
M1961	3.9731	4.91194	-0.914121	3.51164	-1.0919	4.03258	4.00702	3.80348	2.83425	20	MS2 targeting
M1962	5.49835	7.65245	8.08412	5.37313	7.43851	9.4092	5.7036	7.73692	7.76819	20	MS2 targeting
M1963	4.67714	5.54264	7.73057	4.68057	4.5789	6.40156	4.87739	6.36635	4.14148	20	MS2 targeting
M1964	3.75684	4.43828	-0.439758	3.75029	6.84554	2.7526	3.78583	3.59917	6.0648	20	MS2 targeting
M1965	2.43571	2.72993	1.12657	2.18465	-0.113881	-2.77542	2.73085	-2.51857	-6.13898	20	MS2 targeting
M1966	2.57622	3.5703	2.4565	2.6674	1.19469	3.99728	2.93833	3.93784	2.41299	20	MS2 targeting
M1967	2.06789	-6.13898	0.644891	1.79677	4.81289	3.87295	1.81765	0.954638	5.32421	20	MS2 targeting
M1968	2.53549	3.83653	5.28762	3.08684	-2.04891	0.414504	2.8746	-3.40579	0.242128	20	MS2 targeting
M1969	3.22339	4.03116	2.42909	3.0553	4.6328	0.674976	3.44334	5.07393	6.44851	20	MS2 targeting
M1971	4.17445	1.8234	4.98759	4.26178	5.58873	1.25566	4.21172	2.4713	2.01827	20	MS2 targeting
M1972	4.80404	8.42445	4.6623	4.42491	4.67195	6.02289	4.42025	4.23053	2.12753	20	MS2 targeting
M1973	4.68182	7.75764	1.37661	4.48533	6.3599	5.39955	4.60831	4.78188	6.02769	20	MS2 targeting
M1974	6.02089	5.06429	5.61705	5.72346	5.55423	5.82569	5.62832	5.57382	5.3694	20	MS2 targeting
M1975	2.74055	-3.31956	-0.914121	2.14525	3.50945	-1.28706	2.47131	-2.51857	-0.400092	20	MS2 targeting
M1976	2.02929	0.0647235	2.2211	2.32351	3.46556	8.37239	2.40969	0.693715	-0.400092	20	MS2 targeting
M1977	2.67954	0.0647235	0.737182	2.71528	2.59511	6.00227	1.93476	-2.51857	3.64956	20	MS2 targeting
M1978	4.64559	-0.915834	-2.17931	4.04874	-2.96659	1.47683	4.39776	-1.97325	-0.617989	20	MS2 targeting
M1979	1.20852	-0.194401	-0.439758	1.48581	-1.49246	3.22907	1.09353	2.75443	-3.05384	20	MS2 targeting
M1980	5.70227	3.81024	5.14749	5.64441	3.69826	7.10933	5.53762	5.33113	4.85875	20	MS2 targeting
M1981	7.40662	6.87386	9.45046	7.36313	7.94669	9.25053	7.38924	7.61657	7.91829	20	MS2 targeting
M1982	5.15496	6.31362	7.40972	5.45296	5.49724	0.895536	5.36517	6.14236	7.31327	20	MS2 targeting
M1983	4.91935	2.92219	1.81813	4.95006	6.10964	5.50385	4.95339	3.43778	4.38098	20	MS2 targeting
M1984	1.80773	-6.13898	-3.08945	2.1552	-2.04891	-2.77542	1.89677	-6.13898	5.81277	20	MS2 targeting
M1985	5.47161	2.72993	7.48734	5.20486	4.50855	7.63566	5.53143	4.2428	6.00162	20	MS2 targeting
M1986	4.20075	2.16506	7.89423	4.84331	4.47205	6.62809	4.82441	1.79127	-0.0435375	20	MS2 targeting
M1987	3.51638	4.53775	-6.13898	3.78595	-2.04891	6.68096	3.76489	4.88724	6.13844	20	MS2 targeting
M1988	4.20724	3.81024	0.0664604	4.50881	2.35964	2.21085	4.6297	5.73015	4.04265	20	MS2 targeting
M1989	5.67986	4.70876	9.43418	5.68619	6.59363	1.0868	5.98736	6.31933	5.49025	20	MS2 targeting
M1990	2.82184	6.36418	-0.65753	2.22301	4.05485	-1.28706	2.6944	-1.97325	2.97734	20	MS2 targeting
M1991	5.38732	3.79245	2.12188	5.29201	6.34383	1.98919	5.4496	5.99602	1.62989	20	MS2 targeting
M1992	1.58631	-2.42555	-1.22644	2.24181	-1.49246	1.54361	2.30722	-1.97325	-3.05384	20	MS2 targeting
M1993	5.69766	7.29781	0.326233	5.99268	1.33138	7.83877	5.91634	4.713	4.74904	20	MS2 targeting
M1994	2.68576	-0.915834	2.87738	2.91592	2.1538	0.0964108	2.99936	2.24604	3.8752	20	MS2 targeting
M1995	5.34571	4.61571	4.46049	5.29876	5.77106	8.21867	5.46699	5.50927	5.45575	20	MS2 targeting
M1996	6.51307	8.09085	6.26427	6.73948	9.33372	7.64043	6.67516	7.8047	9.1035	20	MS2 targeting
M1997	6.87325	7.29623	10.2052	6.87963	3.38931	8.07721	6.91617	8.02848	6.24937	20	MS2 targeting
M1998	2.97186	-0.343804	4.29575	2.81908	0.0535801	3.70806	3.36666	-2.51857	1.72568	20	MS2 targeting
M2000	3.49883	4.78273	3.59691	3.27202	4.34861	-2.77542	3.2154	1.79127	-2.14144	20	MS2 targeting
M2001	4.01568	4.80508	3.84521	3.80188	4.5229	2.98661	3.74365	3.59917	0.586337	20	MS2 targeting
M2002	3.76568	2.04997	0.202186	2.86225	-0.521553	3.28868	3.15766	4.98543	-0.400092	20	MS2 targeting
M2003	3.60107	8.66529	2.70527	3.39049	0.874999	4.46177	3.40776	7.71672	2.22909	20	MS2 targeting
M2004	5.15832	6.28686	0.983169	4.91535	5.14977	0.674976	4.95955	2.22145	6.49343	20	MS2 targeting
M2005	4.23719	5.89919	5.54227	3.94356	4.55815	5.46991	4.18043	4.63602	2.69918	20	MS2 targeting
M2006	6.88917	9.41972	8.6619	6.74443	6.40513	6.6165	6.78453	8.69758	6.6603	20	MS2 targeting
M2007	6.96654	6.45323	8.11885	6.53124	9.02937	8.08704	6.54918	7.94318	5.72567	20	MS2 targeting
M2008	5.14032	5.16798	3.25056	4.93281	4.94128	8.17852	4.68833	7.03254	5.1409	20	MS2 targeting
M2009	1.59955	-1.17116	4.62654	1.73175	0.0535801	-0.570217	1.55034	-2.51857	-0.874753	20	MS2 targeting
M2010	3.55085	2.95455	3.15342	3.67965	7.23571	2.91275	3.51197	4.86757	2.05562	20	MS2 targeting
M2011	4.34327	4.06119	3.28154	4.12668	2.79748	5.99035	4.1322	2.97639	2.05562	20	MS2 targeting
M2012	3.76274	3.63163	1.97798	3.78275	4.47205	2.29078	3.58943	2.85376	-0.400092	20	MS2 targeting
M2013	3.5406	1.5545	-0.0833721	3.48821	2.8666	3.53833	3.1523	-0.158463	-0.400092	20	MS2 targeting
M2014	3.80048	4.43255	2.25271	3.94069	1.62533	2.16916	3.62085	1.53608	1.94055	20	MS2 targeting
M2015	-0.620034	-6.13898	-1.22644	-0.539807	-2.96659	1.47683	-0.563587	1.12339	-6.13898	20	MS2 targeting
M2017	5.08494	7.39313	5.05638	5.02389	5.24371	2.93779	5.24684	4.08138	6.63431	20	MS2 targeting
M2018	2.12392	-0.343804	-6.13898	2.78744	0.463678	-0.570217	1.87087	0.954638	0.106354	20	MS2 targeting
M2019	6.72225	5.50763	8.26019	6.87135	8.01679	7.41822	6.70753	7.5886	4.28204	20	MS2 targeting
M2020	5.48594	5.09001	6.96103	5.48389	6.20837	5.25758	5.32163	5.71261	5.63297	20	MS2 targeting
M2021	1.6513	3.62159	4.66817	2.20396	-6.13898	4.75737	1.67529	-1.97325	-6.13898	20	MS2 targeting
M2022	4.49792	5.80472	4.50711	4.52617	6.09291	2.36651	4.4068	9.41608	3.95643	20	MS2 targeting
M2023	4.30743	2.19246	1.53926	4.09859	2.32731	4.02091	4.09353	9.26242	0.366216	20	MS2 targeting
M2024	5.25244	6.00919	4.87021	5.54003	6.36985	4.20753	5.28533	6.9442	6.32778	20	MS2 targeting
M2025	3.37731	-1.87772	0.202186	3.42792	3.20586	5.89126	3.24594	4.43684	5.61745	20	MS2 targeting
M2028	1.06324	-1.87772	-0.439758	1.4377	1.33138	-1.28706	1.09353	-1.26881	-1.58691	20	MS2 targeting
M2029	5.61046	4.59019	5.33638	5.63998	6.85691	1.98919	5.49375	4.04681	3.08962	20	MS2 targeting
M2030	2.03904	0.561455	-1.22644	2.67434	2.0781	-1.28706	2.56311	2.492	-0.617989	20	MS2 targeting
M2032	4.68182	5.78235	5.85963	4.99509	5.90579	0.550611	4.84284	7.58439	6.03238	20	MS2 targeting
M2033	6.62165	8.31109	6.58925	6.40295	7.18586	5.55735	6.61452	6.00685	6.59363	20	MS2 targeting
M2034	4.83094	6.8959	7.47651	4.99509	4.12236	7.03729	5.07604	2.06442	1.8584	20	MS2 targeting
M2035	5.02121	5.71074	4.19357	4.80431	5.37208	5.85885	4.86433	6.77183	5.72567	20	MS2 targeting
M2036	8.02373	8.8204	8.13378	7.90815	8.36171	8.91007	7.7764	9.08427	9.68863	20	MS2 targeting
M2037	8.49818	8.98317	8.97667	8.39478	9.25184	9.78882	8.33294	9.47138	8.04207	20	MS2 targeting
M2038	7.15453	7.4353	8.62765	6.8953	9.27693	6.87659	6.89264	8.15519	7.31327	20	MS2 targeting
M2039	7.27722	8.54724	10.0703	7.07675	6.38367	7.53975	7.20687	8.09977	8.67485	20	MS2 targeting
M2040	4.17887	4.28129	4.68565	4.37682	3.64679	0.550611	4.21686	2.64775	1.90006	20	MS2 targeting
M2041	4.27067	8.17737	5.22524	4.33584	4.06469	6.12728	4.04515	5.49652	5.03737	20	MS2 targeting
M2042	2.40589	1.42191	1.85978	2.962	2.59511	-0.570217	2.57117	2.77147	6.9834	20	MS2 targeting
M2043	2.1601	-1.48161	-1.22644	2.34106	-2.04891	-0.570217	0.681689	-6.13898	7.76256	20	MS2 targeting
M2044	2.09617	-0.69897	5.69966	2.13523	-0.778722	2.98661	1.56657	-1.01402	-0.400092	20	MS2 targeting
M2045	4.96224	5.86767	7.0023	4.74129	4.85319	3.43658	4.75886	6.36214	7.90939	20	MS2 targeting
M2046	5.77552	6.50057	6.51134	5.58122	7.0451	9.48867	5.70909	5.60267	6.23723	20	MS2 targeting
M2047	6.29957	8.53626	5.95159	6.31469	9.06136	4.71454	6.35737	7.82982	7.30069	20	MS2 targeting
M2048	1.77311	-1.87772	-0.914121	1.28291	4.08417	0.0964108	2.22783	2.31738	1.16675	20	MS2 targeting
M2049	5.46711	3.77443	6.23292	5.3397	5.50449	4.05565	5.26435	7.59997	4.93588	20	MS2 targeting
M2050	7.40874	11.1919	8.6235	7.2919	7.03763	10.1654	7.21301	8.6878	9.65975	20	MS2 targeting
M2051	7.63104	7.51273	9.89777	7.60515	8.93261	9.3692	7.57662	9.7549	9.26989	20	MS2 targeting
M2052	6.5574	7.10766	4.97343	6.73989	8.03567	9.4966	6.46243	7.61244	7.72248	20	MS2 targeting
M2053	6.88276	9.76827	8.51485	6.97893	10.0798	8.68359	6.84564	8.98162	7.97055	20	MS2 targeting
M2054	6.46507	7.40781	7.51123	6.36861	10.5087	7.806	6.39817	6.22817	7.87911	20	MS2 targeting
M2055	7.50836	8.93709	8.54588	7.39077	9.41625	9.81841	7.54396	8.30933	9.85889	20	MS2 targeting
M2056	5.98668	9.02543	7.97937	6.13022	1.62533	6.51823	6.15833	5.63095	7.45102	20	MS2 targeting
M2057	6.09519	8.2225	10.1308	6.04112	4.17781	8.10442	6.401	7.12492	8.99834	20	MS2 targeting
M2058	4.3859	5.13659	4.83409	4.67885	0.203609	0.550611	4.76765	4.85564	2.74562	20	MS2 targeting
M2059	5.86318	8.48456	7.34336	5.7475	7.83471	7.52433	5.90283	8.31188	9.3278	20	MS2 targeting
M2060	2.24676	-3.31956	-2.17931	2.1749	-1.0919	-6.13898	2.34533	-2.51857	-3.05384	20	MS2 targeting
M2061	6.09402	7.44174	7.68712	6.1409	7.19597	4.85263	6.55681	7.79484	9.27138	20	MS2 targeting
M2062	5.36618	6.40134	6.43244	5.252	6.83839	7.78631	5.48418	6.37474	7.00146	20	MS2 targeting
M2063	6.27297	7.11663	6.86713	6.01403	7.30271	4.23809	6.33742	7.35708	7.99418	20	MS2 targeting
M2064	3.93706	4.3437	4.08361	3.90575	3.87642	3.18791	3.88942	3.95285	4.6303	20	MS2 targeting
M2065	4.8954	6.30109	6.16808	4.98256	2.77368	2.88726	5.08732	4.52487	3.29094	20	MS2 targeting
M2066	4.67245	6.21355	3.87599	4.83094	3.72333	5.98735	5.17326	3.83624	-0.874753	20	MS2 targeting
M2067	1.37168	1.46748	3.45464	1.54756	-6.13898	1.47683	2.30722	-0.609351	-0.0435375	20	MS2 targeting
M2068	1.55947	5.41763	2.89752	1.99819	3.97362	7.31088	2.29753	-0.0348371	-1.58691	20	MS2 targeting
M2069	4.46215	5.79134	5.57077	4.61358	2.67436	6.20669	4.7659	6.70689	2.22909	20	MS2 targeting
M2070	4.3859	5.51035	3.77074	4.38106	4.32425	3.58663	4.56859	5.00717	2.09202	20	MS2 targeting
M2071	2.42831	-3.31956	1.53926	2.89231	-1.49246	-1.84726	2.45397	-0.442901	-1.58691	20	MS2 targeting
M2072	6.56796	4.00049	5.65894	6.11118	7.69124	5.94165	6.42177	6.5941	5.29718	20	MS2 targeting
M2073	7.03967	8.24843	9.13983	6.91813	8.72803	6.51823	6.9602	6.96749	7.63035	20	MS2 targeting
M2074	5.84384	5.07537	7.07704	5.62663	2.9539	6.76032	5.81134	6.35932	3.05315	20	MS2 targeting
M2075	4.9648	1.22373	7.5618	5.19404	0.203609	0.0964108	5.03873	4.58874	1.8584	20	MS2 targeting
M2078	5.17167	6.90006	6.80851	5.20606	3.79601	5.80201	5.18119	2.40733	0.684964	20	MS2 targeting
M2080	5.82917	4.7135	4.59606	5.57845	4.5371	0.550611	5.45832	3.43778	4.07938	20	MS2 targeting
M2081	0.645097	-0.059029	-0.65753	0.683928	-0.303365	-1.84726	0.681689	-0.442901	-1.58691	20	MS2 targeting
M2082	4.65829	4.4722	2.63504	4.4873	6.01132	4.71454	4.60635	2.91638	3.05315	20	MS2 targeting
M2083	5.30084	3.26953	3.75978	5.301	4.83605	0.895536	5.27055	3.56048	6.5534	20	MS2 targeting
M2084	4.89942	-1.48161	7.15544	4.82004	6.18149	0.674976	4.36335	4.50463	5.97018	20	MS2 targeting
M2085	0.364147	-3.31956	-3.08945	0.344455	-2.96659	1.89002	0.7684	-6.13898	0.242128	20	MS2 targeting
M2086	0.12884	0.561455	2.70527	-1.27834	-2.04891	-0.884567	-0.877971	3.45897	1.8155	20	MS2 targeting
M2087	3.98071	4.17543	3.55948	4.24789	5.91398	6.64339	4.3517	4.40989	0.242128	20	MS2 targeting
M2088	4.26653	-0.194401	4.63856	4.04071	5.29058	-1.28706	4.40455	6.21422	-2.14144	20	MS2 targeting
M2091	0.813567	-6.13898	0.326233	0.789933	-6.13898	-0.884567	1.67529	-6.13898	-1.58691	20	MS2 targeting
M2092	2.82184	4.24903	0.644891	3.1824	-1.0919	0.674976	3.26595	3.95285	2.95774	20	MS2 targeting
M2093	1.57296	1.95719	1.93965	1.96463	-1.49246	-1.28706	2.39159	2.97639	0.945874	20	MS2 targeting
M2094	0.234417	-0.915834	1.37661	1.08887	-2.96659	-0.884567	1.24233	-0.293683	0.586337	20	MS2 targeting
M2096	0.332792	-1.17116	0.823923	0.981097	-6.13898	-0.0935013	1.15919	0.0790259	1.52729	20	MS2 targeting
M2098	2.72855	-0.059029	5.14328	2.42572	-6.13898	-1.84726	2.687	4.83957	0.945874	20	MS2 targeting
M2099	1.58631	1.51165	-1.22644	1.5626	2.26039	-0.312258	1.41354	4.42073	4.98993	20	MS2 targeting
M2100	1.4614	1.89184	0.202186	1.87111	-1.49246	-0.570217	1.70491	6.69355	5.09231	20	MS2 targeting
M2101	4.03042	2.41809	-1.22644	4.27781	2.29424	4.31657	4.42025	2.62917	2.35425	20	MS2 targeting
M2102	4.07847	1.27589	3.78162	4.44938	5.5819	5.67745	4.42915	6.66989	5.33185	20	MS2 targeting
M2103	3.80905	-0.343804	1.257	4.12415	-1.0919	-0.884567	3.59735	1.22583	4.20933	20	MS2 targeting
M2104	3.73002	0.474859	3.88611	4.38741	5.52957	5.68116	3.96786	-1.97325	6.51034	20	MS2 targeting
M2105	6.24166	3.12062	5.34006	6.03102	4.18685	6.59107	5.76024	5.62393	5.99202	20	MS2 targeting
M2106	6.24008	4.70876	6.82174	5.84603	5.2042	5.62444	5.93365	6.38584	5.89748	20	MS2 targeting
M2107	4.30339	1.37486	5.18893	3.43202	0.339496	-1.84726	3.84022	1.8243	-2.14144	20	MS2 targeting
M2108	5.08964	3.65151	3.13657	4.86772	6.59022	5.61283	4.83951	0.543118	4.71443	20	MS2 targeting
M2109	9.33229	8.52552	9.46592	9.14378	9.52649	10.2269	9.09412	10.3412	10.2113	20	MS2 targeting
M2110	4.24773	4.21604	1.31805	3.83321	6.11912	4.76439	3.93387	7.26685	4.5735	20	MS2 targeting
M2111	7.90716	8.2787	7.60454	7.78677	9.27454	9.57227	7.78509	8.25358	7.19901	20	MS2 targeting
M2112	4.94549	4.07598	5.70538	4.9937	3.22354	0.994338	4.8528	4.36007	7.17694	20	MS2 targeting
M2113	4.44392	7.16064	3.97408	4.41873	4.09381	9.06052	4.32572	6.6084	5.61432	20	MS2 targeting
M2114	6.47048	6.94605	3.2189	6.39615	9.05366	4.18678	6.15967	9.84618	9.68566	20	MS2 targeting
M2115	6.46642	8.71218	1.37661	6.31358	9.89051	5.51221	6.03259	5.7104	6.50529	20	MS2 targeting
M2116	5.96255	3.20374	2.42909	6.02425	6.32143	5.43516	5.69256	6.56141	3.48136	20	MS2 targeting
M2117	6.54975	8.87979	6.61987	6.39562	9.26391	6.06612	6.07219	7.38434	6.59363	20	MS2 targeting
M2118	6.00358	9.65883	7.85551	6.16265	5.93291	6.13812	5.86316	7.98942	6.92532	20	MS2 targeting
M2119	2.34433	6.28686	7.34244	3.26284	2.29424	-0.570217	2.7734	2.77147	4.84281	20	MS2 targeting
M2120	3.49529	4.36192	3.46817	3.86084	-2.04891	-0.570217	3.53276	0.954638	1.02332	20	MS2 targeting
M2121	4.48372	5.51035	2.99421	4.37256	0.0535801	4.89161	4.2944	-0.609351	10.0645	20	MS2 targeting
M2122	3.78608	5.7319	7.38229	3.76985	-0.113881	4.83274	3.92131	4.37687	0.777277	20	MS2 targeting
M2123	3.44486	4.44968	7.44777	3.49607	1.95654	4.69997	3.64397	4.49953	0.864037	20	MS2 targeting
M2124	3.00705	-1.87772	-0.914121	2.59613	1.86941	7.13121	3.11969	-1.57845	-3.05384	20	MS2 targeting
M2125	-0.244066	-3.31956	-1.62559	0.118948	0.339496	-2.77542	-0.305605	-0.293683	-3.05384	20	MS2 targeting
M2126	7.79371	10.6176	10.2309	7.82097	10.6714	9.61438	7.97748	10.1106	10.9403	20	MS2 targeting
M2127	5.71068	6.47011	5.27996	5.72011	8.71559	4.20753	5.57819	4.98177	7.70128	20	MS2 targeting
M2128	3.78318	3.8793	4.28049	4.1063	-1.49246	-0.884567	4.30894	5.91783	3.52195	20	MS2 targeting
M2130	0.539189	-0.510485	-0.65753	0.888679	2.84393	-2.77542	0.421205	4.10173	-3.05384	20	MS2 targeting
M2131	4.30743	5.2903	2.2211	4.15671	5.41117	1.94046	3.82682	2.3404	5.51057	20	MS2 targeting
M2132	5.54014	6.51556	6.24279	5.4829	3.53798	1.33321	5.54889	5.67915	5.9775	20	MS2 targeting
M2133	5.87615	6.42174	6.99297	5.95686	4.1129	3.03383	5.81219	6.03711	5.68454	20	MS2 targeting
M2134	5.91901	2.48608	5.43613	6.26844	6.68736	6.89589	6.11694	5.03918	3.84352	20	MS2 targeting
M2135	4.08554	1.51165	6.17222	3.90869	3.64679	3.34594	4.3841	1.49564	5.35075	20	MS2 targeting
M2136	4.8954	6.03401	3.18653	5.16355	3.4203	4.04416	5.44413	4.11514	2.99667	20	MS2 targeting
M2137	4.85459	5.57423	4.39116	4.84331	5.46045	3.3271	4.95801	4.7174	2.01827	20	MS2 targeting
M2138	5.95678	5.01143	3.57206	5.92813	4.92516	2.83489	6.02747	5.81065	5.88457	20	MS2 targeting
M2139	3.77737	1.27589	4.97816	4.10887	6.0881	5.91036	4.11851	1.61371	6.22704	20	MS2 targeting
M2140	4.83933	6.32604	7.59146	4.55464	5.63899	6.74975	4.87577	5.3652	3.778	20	MS2 targeting
M2141	6.96814	6.30737	8.92793	7.12502	9.34411	7.61833	7.07239	3.30366	6.51202	20	MS2 targeting
M2142	7.45861	8.42734	9.3049	7.45261	8.39718	8.148	7.32393	8.949	7.7731	20	MS2 targeting
M2143	5.00016	3.8793	7.11624	5.04679	6.68736	4.41794	5.24935	2.19644	8.2057	20	MS2 targeting
M2144	6.41026	8.55419	8.94889	6.37714	7.90896	6.36047	6.46568	4.85963	5.93804	20	MS2 targeting
M2145	4.30944	5.95823	5.50009	4.35755	6.27769	5.133	3.96786	7.18099	3.35225	20	MS2 targeting
M2146	5.16835	5.35537	5.64412	4.98256	4.51574	6.17281	4.93163	7.47878	4.52106	20	MS2 targeting
M2147	4.14316	2.52969	5.40129	3.88795	1.45624	-1.28706	4.03935	0.763502	2.97734	20	MS2 targeting
M2148	3.35407	8.60413	4.36247	3.35207	5.28638	0.895536	3.4301	2.86967	1.8155	20	MS2 targeting
M2149	5.99359	7.53965	7.29389	5.98852	6.95936	7.06313	5.91793	2.45029	5.60175	20	MS2 targeting
M2150	6.23584	8.33164	5.56133	6.23364	6.45274	7.39467	6.18944	6.02827	7.83012	20	MS2 targeting
M2151	8.29086	9.88948	9.32758	8.25051	6.49702	8.86059	8.18743	9.87011	8.27265	20	MS2 targeting
M2152	7.42602	10.326	7.51775	7.29809	5.93827	6.15691	7.37117	9.84932	7.07491	20	MS2 targeting
M2153	5.32992	5.49118	6.00129	5.63021	5.29058	8.87159	5.62154	1.75746	6.32587	20	MS2 targeting
M2154	6.95533	7.05173	8.71713	6.87738	4.29946	6.16488	6.79834	7.03077	4.73184	20	MS2 targeting
M2155	6.42614	5.47174	8.67436	6.38773	4.97297	9.73515	6.5224	9.20067	7.18749	20	MS2 targeting
M2156	5.37391	6.2932	4.85484	5.11211	1.99821	1.94046	5.0732	9.05042	3.03457	20	MS2 targeting
M2157	4.46576	-0.194401	1.12657	4.54142	3.43554	0.550611	4.33995	-0.609351	2.67538	20	MS2 targeting
M2158	2.81051	-0.915834	2.08723	3.21131	1.67756	-0.570217	3.17364	2.68419	-0.874753	20	MS2 targeting
M2159	0.790671	-6.13898	-3.08945	1.00331	-6.13898	-2.77542	0.58943	-6.13898	-1.58691	20	MS2 targeting
M2160	2.58955	-6.13898	1.31805	2.65343	-2.96659	7.19362	2.83497	-3.40579	1.02332	20	MS2 targeting
M2161	2.39074	-0.69897	-1.22644	2.78103	-1.0919	-0.312258	2.42757	0.28289	1.90006	20	MS2 targeting
M2162	6.11491	4.24249	3.68064	6.15956	5.00398	7.4326	6.03477	5.17342	2.46942	20	MS2 targeting
M2163	7.89865	7.45664	8.76141	7.77289	7.62045	7.29401	7.71336	6.16188	7.89014	20	MS2 targeting
M2164	9.43686	9.15183	9.91747	9.40958	9.33194	11.1831	9.13047	9.59989	8.00078	20	MS2 targeting
M2165	6.38946	6.2932	6.35081	6.46777	6.45835	8.51286	6.29545	6.15215	6.81395	20	MS2 targeting
M2166	8.43129	8.71158	10.2695	8.46523	8.76998	9.70127	8.14484	9.45004	9.29401	20	MS2 targeting
M2167	8.75214	10.3566	9.99881	8.66531	7.99316	10.0099	8.4389	10.2188	9.91996	20	MS2 targeting
M2168	4.82531	3.72839	4.88541	4.90359	0.203609	5.13841	4.54626	4.8274	1.67858	20	MS2 targeting
M2172	4.04983	1.89184	1.90027	3.8578	-2.04891	3.34594	4.12947	0.0790259	7.05776	20	MS2 targeting
M2173	2.15114	0.993931	-1.62559	1.95326	-2.04891	-0.884567	2.18644	-1.97325	1.09681	20	MS2 targeting
M2174	3.62391	3.32009	2.87738	3.89391	2.8666	4.03258	3.76137	2.55239	0.945874	20	MS2 targeting
[truncated: 10,712 more rows]

## Sheet: Diff_expressed_glm
MOI 10								MOI 100
sgRNA	logFC	logCPM	LR	PValue	FDR			sgRNA	logFC	logCPM	LR	PValue	FDR
M9880	6.89476	5.36528	10.2113	0.0013958	0.0361345			M10687	7.04854	5.99948	11.472	0.000706536	0.025086
M10327	6.7652	6.99797	10.6518	0.00109965	0.0316307			M11888	7.03224	5.39591	10.6408	0.0011062	0.0316555
M6831	6.36118	3.46581	10.4081	0.00125463	0.0343698			M4786	6.38885	6.36838	9.37485	0.00219983	0.0427037
M8878	6.27192	5.90632	10.8173	0.00100559	0.0301462			M5715	6.38057	9.70848	9.91253	0.00164158	0.0377325
M10658	6.14822	7.25757	10.0584	0.00151656	0.0378724			M14483	5.98331	7.00913	10.1171	0.00146899	0.0363982
M1788	5.84833	6.87785	9.55841	0.00199035	0.0450167			M7136	5.87373	6.41718	13.1842	0.000282317	0.0181239
M11845	5.71124	4.22095	11.1621	0.000834833	0.0270703			M8295	5.84663	5.80793	10.8841	0.00096995	0.0297085
M957	5.61537	8.34529	14.8181	0.000118394	0.0110123			M7682	5.78634	6.10872	9.2844	0.00231113	0.0434773
M3415	5.59438	7.65146	13.0061	0.000310472	0.0162039			M6186	5.72339	8.21325	9.16996	0.0024602	0.0450599
M8832	5.5422	7.79754	9.28703	0.00230781	0.0491367			M3202	5.57099	6.91284	10.6391	0.0011072	0.0316555
M5999	5.51531	6.53964	9.94706	0.00161107	0.0393813			M12585	5.54128	7.12381	11.878	0.00056801	0.0226497
M9663	5.39037	7.29578	16.0715	6.09937e-05	0.00772879			M14281	5.53574	5.60748	13.8164	0.000201574	0.0160757
M1204	5.29002	6.59733	12.8841	0.000331386	0.0168225			M6878	5.51226	5.46253	15.47	8.38237e-05	0.0122963
M12541	5.27417	6.61726	13.6445	0.000220887	0.0142352			M15203	5.40402	8.80913	11.2697	0.00078781	0.0264882
M14044	5.26913	6.62849	10.9056	0.000958738	0.0294478			M5121	5.31599	6.66243	10.4846	0.00120372	0.0330449
M4744	5.24731	6.17008	18.6084	1.60508e-05	0.00453382			M14238	5.2338	8.45054	27.2104	1.82472e-07	0.0023194
M6885	5.20831	5.88192	10.3491	0.00129535	0.0348414			M15588	5.21516	6.56975	10.5869	0.00113893	0.0321365
M8579	5.14519	7.77782	10.3126	0.00132126	0.0350617			M17020	5.15344	7.74179	8.7832	0.00304017	0.0497583
M14238	5.12078	8.45054	26.3309	2.87657e-07	0.00220569			M10431	5.14124	6.33512	17.1897	3.38266e-05	0.0102392
M8750	4.92871	7.12737	12.0551	0.000516499	0.0216766			M5202	5.1161	8.30762	10.3694	0.00128123	0.0340025
M616	4.91886	2.98095	9.54059	0.00200977	0.0450754			M7723	5.11298	7.15183	8.95723	0.00276374	0.0474728
M7714	4.72495	4.17378	13.1434	0.000288534	0.0158769			M3210	5.04487	8.88387	18.9222	1.36159e-05	0.00853067
M11033	4.66926	5.77926	10.1919	0.00141062	0.0361932			M1101	5.01715	7.76151	17.1332	3.48472e-05	0.0102392
M10509	4.64876	7.51421	10.757	0.00103888	0.030497			M8835	5.00503	6.28438	10.7321	0.00105292	0.0310526
M4327	4.64713	7.7534	10.943	0.000939556	0.0291998			M3220	4.93271	7.66721	9.59728	0.00194866	0.041009
M5431	4.62434	7.19592	11.5188	0.000688966	0.0244235			M4337	4.92892	7.03137	8.91833	0.00282323	0.0480604
M13236	4.54975	8.3524	9.25238	0.0023519	0.049577			M1876	4.92184	6.80732	13.6959	0.000214925	0.0162614
M7176	4.53655	5.59198	9.4888	0.0020673	0.045713			M3421	4.8591	6.56135	13.2357	0.000274665	0.0178181
M1754	4.51759	7.33654	9.54258	0.0020076	0.0450754			M1783	4.77904	8.06306	12.3142	0.000449524	0.0211257
M10305	4.50855	7.3674	13.7121	0.000213078	0.013961			M7242	4.68631	4.71588	12.2672	0.000460979	0.0212301
M8197	4.50179	5.69935	10.9734	0.000924304	0.028938			M12466	4.66889	7.49155	10.7001	0.00107129	0.031196
M8268	4.49237	5.92546	9.6481	0.00189547	0.0436474			M3207	4.61525	6.62202	12.6507	0.000375431	0.0201354
M4250	4.48402	6.64291	10.3457	0.00129778	0.0348414			M8254	4.59312	6.23976	14.465	0.000142787	0.0142911
M15279	4.44219	5.95743	9.58787	0.00195867	0.0446347			M4442	4.57949	2.22423	12.4409	0.000420031	0.020501
M5519	4.41011	6.90596	10.3358	0.00130474	0.0348414			M8978	4.57106	5.76554	8.75817	0.00308218	0.0497583
M12997	4.40402	2.47864	12.0058	0.000530361	0.0216766			M14966	4.55313	8.11982	12.8718	0.000333577	0.0190314
M719	4.39487	8.22761	24.4502	7.6257e-07	0.0029988			M9787	4.53253	7.49456	8.83263	0.00295892	0.0490984
M3406	4.29482	6.85217	12.4964	0.000407735	0.018725			M1449	4.52428	6.95107	15.3736	8.82131e-05	0.0122963
M5341	4.25502	7.38776	10.1085	0.00147589	0.0372963			M4746	4.45305	6.90767	16.4589	4.97171e-05	0.0106969
M11543	4.23781	6.54515	10.3936	0.0012645	0.0344163			M7990	4.45112	7.88107	19.9954	7.76289e-06	0.00853067
M1756	4.22011	4.64586	9.35772	0.00222049	0.0477573			M5800	4.44712	8.26476	9.35231	0.00222705	0.042757
M16039	4.1857	8.35545	9.90715	0.00164637	0.0397494			M8268	4.44634	5.92546	9.49222	0.00206345	0.0420441
M5116	4.16554	6.30869	11.1716	0.000830581	0.0270013			M4785	4.35369	5.2295	9.72861	0.00181421	0.0393523
M4726	4.05566	6.7967	9.24832	0.00235711	0.0496048			M1153	4.33117	6.79115	11.4539	0.000713448	0.0251906
M7977	4.02181	6.90952	9.8842	0.00166704	0.0401321			M1258	4.25072	8.03629	11.8647	0.000572078	0.022724
M16474	4.00085	7.88257	10.242	0.00137279	0.0358306			M3096	4.24756	9.32708	22.6669	1.92658e-06	0.00816294
M16428	3.9682	8.72788	12.4882	0.000409532	0.018725			M1152	4.19507	5.63103	11.8766	0.000568426	0.0226497
M519	3.94807	7.97052	10.1897	0.0014123	0.0361932			M1394	4.125	7.18406	10.101	0.00148193	0.0365763
M14734	3.92913	7.78228	17.8039	2.44875e-05	0.0054607			M2592	4.06752	7.98767	10.1462	0.00144596	0.0360692
M3210	3.89717	8.88387	12.5972	0.000386335	0.0183436			M15164	4.03276	8.13899	8.96117	0.00275779	0.0474728
M15122	3.89443	5.49815	10.5491	0.00116246	0.0326939			M15139	3.99865	6.84956	10.1991	0.00140512	0.0357215
M48	3.8839	7.78845	12.3079	0.000451053	0.0198385			M5785	3.98701	8.14435	13.3026	0.000265039	0.0177311
M15172	3.83596	7.59451	11.2357	0.000802402	0.0264209			M17491	3.9823	9.20739	14.2055	0.000163892	0.0154313
M8836	3.78752	5.18607	9.25897	0.00234345	0.049577			M5296	3.96923	7.98804	12.9329	0.000322856	0.0190314
M13851	3.77433	6.61564	12.3765	0.000434782	0.0192577			M14551	3.95562	8.40742	13.8314	0.000199968	0.0160757
M1207	3.71762	7.95358	10.9569	0.000932553	0.0290531			M1121	3.95339	7.47007	9.35263	0.00222666	0.042757
M17328	3.6881	9.80452	15.1596	9.8794e-05	0.00988796			M3523	3.89553	6.92017	10.0478	0.00152528	0.0369315
M6874	3.62314	6.6787	10.5093	0.00118776	0.0330409			M4903	3.8851	6.93122	10.5274	0.00117615	0.032725
M1220	3.61521	6.41756	10.2463	0.0013696	0.0358306			M8824	3.82841	7.2394	8.79694	0.00301736	0.0496166
M1894	3.5196	8.02967	10.897	0.000963219	0.0294478			M16721	3.82415	6.86381	13.2665	0.000270186	0.0178093
M6097	3.50703	7.49464	9.98239	0.00158045	0.0387819			M10471	3.8183	7.04847	10.558	0.00115689	0.0325338
M1196	3.5018	8.3174	14.3513	0.000151674	0.0120495			M6954	3.81804	8.66867	13.3405	0.000259739	0.0175526
M3124	3.4741	7.39579	10.6253	0.00111553	0.032008			M14991	3.81338	6.51246	11.5732	0.00066908	0.02458
M15219	3.46476	9.19837	17.6794	2.61438e-05	0.00558888			M10305	3.81337	7.3674	10.4759	0.00120941	0.0330449
M1634	3.44142	8.9276	12.4117	0.000426659	0.019096			M8457	3.80702	6.83422	12.5684	0.000392326	0.020501
M3501	3.4142	8.45834	13.5812	0.000228462	0.0142352			M12588	3.74783	7.96306	12.4882	0.000409532	0.020501
M3404	3.40548	9.16017	17.3288	3.14378e-05	0.00594191			M11770	3.73477	6.88716	11.0777	0.000873732	0.0283093
M1541	3.37471	7.86696	10.3944	0.00126401	0.0344163			M5372	3.72555	7.23489	9.37181	0.00220347	0.0427037
M15183	3.37012	7.87284	13.8623	0.000196704	0.0135152			M2785	3.69513	7.78435	10.698	0.00107251	0.031196
M8267	3.36399	6.87098	11.7206	0.000618115	0.0231084			M6492	3.67757	6.52239	10.1058	0.00147801	0.0365507
M15121	3.35235	8.29263	10.7955	0.0010175	0.0303603			M1613	3.67004	6.97744	10.9193	0.000951671	0.0293609
M611	3.33901	8.30237	14.3252	0.000153794	0.0120606			M15120	3.66778	9.36662	23.5468	1.21914e-06	0.00774823
M1198	3.31635	7.09399	12.4289	0.000422735	0.0189987			M4532	3.66518	4.99556	9.89814	0.00165446	0.0378235
M17304	3.31066	8.77029	12.812	0.000344396	0.0172308			M15148	3.62998	8.12738	9.93246	0.00162389	0.0377325
M7990	3.28012	7.88107	12.1081	0.000502036	0.02142			M15124	3.62197	8.74262	16.3628	5.23012e-05	0.0106969
M17311	3.25519	9.19451	16.5855	4.65063e-05	0.00678556			M1195	3.59677	7.14469	11.9419	0.000548846	0.0226128
M15120	3.22749	9.36662	18.9754	1.32417e-05	0.00420788			M17973	3.59373	7.62756	9.50688	0.00204703	0.0419675
M45	3.20826	8.15699	12.4891	0.000409331	0.018725			M6763	3.54471	7.83259	8.7604	0.00307841	0.0497583
M2572	3.164	8.87594	10.7804	0.00102581	0.0303941			M45	3.52609	8.15699	14.6606	0.000128707	0.0142911
M15315	3.13084	10.1394	13.632	0.000222364	0.0142352			M3419	3.51447	7.05642	11.307	0.000772146	0.0261727
M14210	3.0839	8.26188	11.6754	0.000633311	0.0232298			M1365	3.5116	6.48942	12.1295	0.000496303	0.0219094
M5675	3.0777	8.55741	13.303	0.000264981	0.0156276			M601	3.5025	8.63766	13.3315	0.000260989	0.0175526
M17316	3.07682	9.94186	11.7517	0.00060789	0.0230922			M16134	3.50148	8.73748	11.7775	0.000599515	0.0233041
M15196	3.06025	8.54401	12.7897	0.00034854	0.0172308			M16089	3.50134	8.12379	12.111	0.000501241	0.0219094
M3268	3.04023	8.47884	12.7346	0.000358951	0.0175406			M1541	3.49023	7.86696	11.0022	0.000910042	0.0286044
M1812	3.03308	6.9277	10.8667	0.000979067	0.0297344			M15555	3.48165	5.53795	9.11234	0.0025389	0.0457479
M1206	3.00955	8.22309	10.098	0.00148428	0.0373385			M602	3.44973	8.18539	12.8292	0.000341252	0.0191086
M15126	2.99008	9.0619	9.37748	0.00219668	0.0473253			M3413	3.44904	7.48031	11.4775	0.000704456	0.0250822
M15199	2.97702	8.43001	12.0205	0.000526195	0.0216766			M2376	3.44185	8.16734	8.82205	0.00297612	0.0492571
M15152	2.97586	-0.00471865	9.67576	0.00186715	0.04323			M14210	3.42936	8.26188	14.0009	0.000182719	0.0157636
M1259	2.97292	7.18642	10.162	0.00143366	0.0365928			M3329	3.42825	7.47955	11.9606	0.000543362	0.0224973
M3293	2.9457	8.14041	11.4304	0.000722518	0.0248692			M15193	3.42248	7.90234	10.0317	0.00153873	0.0369315
M17313	2.88451	8.20962	9.91024	0.00164362	0.0397494			M15152	3.41974	-0.00471865	12.4418	0.000419838	0.020501
M9546	2.8561	9.13133	10.6679	0.00109009	0.0315555			M3366	3.40439	8.66514	10.1499	0.00144308	0.0360692
M17588	2.82558	8.92318	10.77	0.00103158	0.0304477			M1786	3.35821	7.9259	9.61089	0.00193427	0.0407974
M2053	2.77588	8.73872	13.2045	0.00027928	0.0156276			M16413	3.34206	7.47291	9.00761	0.00268857	0.0470722
M15119	2.75649	8.72387	10.3985	0.00126116	0.0344163			M13851	3.30603	6.61564	9.90855	0.00164512	0.0377458
M15303	2.74526	9.3828	9.75878	0.00178468	0.0420874			M4735	3.27509	7.86709	12.845	0.000338376	0.0190314
M17319	2.68385	9.75349	11.6569	0.000639658	0.0232306			M612	3.24925	8.10329	11.6498	0.000642098	0.0239346
M18036	2.65695	10.0658	12.0349	0.000522136	0.0216766			M15307	3.23204	9.90931	12.9163	0.000325735	0.0190314
M3096	2.65322	9.32708	10.2063	0.00139962	0.0361597			M1617	3.22522	9.15311	12.1133	0.00050063	0.0219094
M1941	2.65207	8.35007	10.2899	0.00133761	0.0352747			M1760	3.20379	9.39867	10.6202	0.0011186	0.03188
M17320	2.6442	9.99188	11.4066	0.00073183	0.0248821			M3003	3.20187	8.56698	9.91432	0.00163998	0.0377325
M2126	2.62136	9.95869	13.2028	0.000279531	0.0156276			M15682	3.17432	8.59877	10.0312	0.00153913	0.0369315
M3611	2.61512	9.95897	11.0788	0.0008732	0.0278876			M2057	3.1249	8.1635	9.43918	0.00212398	0.0423638
M806	2.59418	8.37939	9.74267	0.0018004	0.0421452			M7818	3.10076	7.12192	10.0182	0.00155002	0.0369315
M17322	2.57005	9.66077	11.1208	0.000853637	0.0274698			M15305	3.09065	9.80001	10.0332	0.00153743	0.0369315
M2745	2.55364	10.6285	13.2363	0.000274576	0.0156276			M17527	3.07793	8.24239	10.4338	0.00123727	0.0336764
M14950	2.52227	8.24325	9.74501	0.0017981	0.0421452			M1962	3.07509	7.71599	12.3398	0.000443408	0.0210305
M14945	2.50199	8.04767	9.49059	0.00206528	0.045713			M1732	3.04987	6.90224	10.8419	0.000992282	0.0300165
M17703	2.4843	9.241	10.8309	0.00099822	0.0299962			M896	2.99788	8.41866	10.9589	0.000931551	0.028951
M907	2.48072	9.32572	9.23931	0.00236874	0.0497671			M792	2.99746	8.25486	10.0859	0.00149411	0.0367343
M17330	2.46506	9.84135	11.3126	0.000769831	0.0257508			M1612	2.97188	7.5363	8.96905	0.00274592	0.0474728
M18032	2.45833	9.67431	10.5513	0.00116104	0.0326939			M905	2.96603	7.98873	9.06657	0.00260325	0.0463941
M292	2.45486	10.3312	11.8623	0.000572816	0.0224033			M15200	2.9446	7.67206	10.0261	0.00154341	0.0369315
M17881	2.43245	8.99678	9.41676	0.00215011	0.046798			M1198	2.93284	7.09399	10.0503	0.00152322	0.0369315
M1161	2.41533	9.70873	10.7105	0.00106531	0.0310577			M3404	2.92493	9.16017	13.3346	0.000260559	0.0175526
M14956	2.34245	10.4176	11.7274	0.000615866	0.0230922			M15320	2.91074	9.66909	9.37147	0.00220389	0.0427037
M556	2.30753	8.55333	9.52107	0.00203126	0.0451388			M17330	2.90119	9.84135	15.1223	0.000100764	0.0125342
M17718	2.29972	10.323	11.0237	0.000899533	0.0282459			M17707	2.89471	10.3284	13.265	0.000270412	0.0178093
M17317	2.2745	9.8835	9.48828	0.00206789	0.045713			M1761	2.88558	9.52759	12.5566	0.000394812	0.020501
M17725	2.27088	9.2609	9.27616	0.00232156	0.0493467			M2575	2.87622	9.90746	14.1216	0.000171367	0.015642
M3615	2.25241	9.54026	10.0201	0.0015484	0.0383781			M15630	2.8411	8.3922	9.73074	0.00181211	0.0393523
M17716	2.09049	10.4235	9.3406	0.00224133	0.048046			M17586	2.83918	9.69949	12.8734	0.000333289	0.0190314
M1748	2.01036	11.7861	9.527	0.0020247	0.0451388			M5207	2.78787	8.62664	10.5848	0.00114024	0.0321365
M9253	-3.08184	7.51053	10.2899	0.0013376	0.0352747			M17328	2.78422	9.80452	9.35877	0.00221921	0.042757
M12103	-3.31539	0.971819	9.6782	0.00186467	0.04323			M15315	2.76828	10.1394	10.9926	0.000914744	0.0286044
M15906	-3.40006	0.85852	9.34048	0.00224147	0.048046			M3501	2.75844	8.45834	9.38469	0.00218805	0.0427037
M11804	-3.50918	1.16859	9.83244	0.00171461	0.0408901			M17878	2.74719	8.82816	8.76306	0.00307392	0.0497583
M8768	-3.51454	0.149936	9.52877	0.00202275	0.0451388			M7701	2.72906	8.06242	9.06461	0.00260604	0.0463941
M5637	-3.55003	1.6804	9.97171	0.00158964	0.0389324			M15351	2.71217	10.7516	12.0515	0.000517519	0.0223687
M14978	-3.59284	0.798077	10.2626	0.00135752	0.0356517			M9485	2.67256	9.12531	12.0288	0.000523854	0.0223687
M13701	-3.59774	1.25678	10.9377	0.000942267	0.0292126			M1196	2.66891	8.3174	8.96054	0.00275874	0.0474728
M1033	-3.62069	0.703006	11.3224	0.000765786	0.0257508			M5363	2.647	8.11996	9.80558	0.00173983	0.0389348
M15898	-3.68065	0.427722	10.5489	0.00116259	0.0326939			M17871	2.63906	9.64173	10.5415	0.00116725	0.0326803
M838	-3.69858	0.632482	11.231	0.000804411	0.0264209			M17324	2.62563	7.79704	9.53853	0.00201202	0.0415851
M17818	-3.71724	1.07737	10.8959	0.000963756	0.0294478			M17322	2.61574	9.66077	11.4776	0.000704397	0.0250822
M9355	-3.72636	0.797374	9.54376	0.00200631	0.0450754			M18046	2.61545	10.1052	12.9256	0.000324123	0.0190314
M359	-3.74078	0.214334	10.0872	0.001493	0.0374309			M7063	2.56006	7.80257	9.01884	0.00267211	0.0470327
M13783	-3.74761	2.80104	9.25355	0.00235039	0.049577			M9989	2.54821	8.08335	9.07615	0.00258965	0.0462968
M6502	-3.75387	-0.00234795	10.2981	0.00133165	0.0352637			M16102	2.54249	8.63823	9.61062	0.00193455	0.0407974
M12574	-3.76335	1.27582	9.81327	0.00173257	0.0412411			M2673	2.54156	8.81478	9.14815	0.00248969	0.0453788
M3947	-3.773	1.24055	11.7841	0.000597397	0.0229411			M17299	2.51694	8.36862	9.68116	0.00186167	0.0399724
M13471	-3.77886	0.0783246	11.0236	0.000899568	0.0282459			M1748	2.50105	11.7861	14.2216	0.000162497	0.0154142
M11477	-3.78502	1.58077	10.0255	0.00154384	0.0383781			M15220	2.49998	8.77803	11.0446	0.000889445	0.0286044
M1956	-3.80638	1.85631	9.62107	0.00192357	0.0441195			M17703	2.49898	9.241	10.9463	0.000937921	0.0290778
M5617	-3.82706	-0.230154	9.72587	0.00181693	0.042454			M2126	2.49657	9.95869	12.0949	0.000505589	0.0220087
M16626	-3.83866	0.187278	10.509	0.00118792	0.0330409			M17877	2.49276	8.14316	9.92083	0.00163419	0.0377325
M5227	-3.84153	0.11915	9.38521	0.00218743	0.0472061			M15329	2.46726	9.77171	12.2968	0.000453726	0.0211257
M6955	-3.85513	1.29774	11.5491	0.000677831	0.024202			M17908	2.46616	9.45846	10.3345	0.00130566	0.0342141
M874	-3.86343	2.23613	9.26434	0.00233659	0.049577			M15312	2.45285	12.0759	10.6387	0.00110744	0.0316555
M545	-3.8713	0.27904	9.44938	0.00211221	0.0464503			M18037	2.44828	9.81052	11.1826	0.000825683	0.0272604
M4676	-3.87451	0.441379	12.3847	0.000432876	0.0192577			M17681	2.44151	10.7545	11.4608	0.000710799	0.025167
M1396	-3.88784	1.09435	12.7283	0.000360169	0.0175406			M7010	2.4187	8.34359	9.01167	0.00268261	0.0470327
M7931	-3.91167	1.34897	9.42486	0.00214064	0.0467519			M15219	2.38044	9.19837	9.14587	0.0024928	0.0453788
M15685	-3.91493	2.00091	9.48226	0.00207468	0.0457835			M2287	2.30376	13.5011	13.3773	0.000254692	0.0175029
M14220	-3.9208	-0.601049	9.39286	0.00217832	0.0470895			M15313	2.28959	10.5626	9.81917	0.00172702	0.0387847
M8089	-3.93718	0.913429	10.1266	0.00146148	0.0370795			M17345	2.28695	9.7992	10.6416	0.00110572	0.0316555
M16313	-3.93723	1.18303	11.9622	0.000542919	0.0218387			M1161	2.24528	9.70873	9.37432	0.00220046	0.0427037
M4904	-3.94187	1.04486	10.9005	0.000961401	0.0294478			M17318	2.22537	9.42475	8.96164	0.00275707	0.0474728
M9510	-3.94537	-0.199538	10.0413	0.00153072	0.0381509			M18047	2.20732	10.5943	9.41786	0.00214882	0.0426111
M5427	-3.94913	3.42447	10.1445	0.00144736	0.0367948			M3615	2.19452	9.54026	9.55172	0.00199762	0.0414221
M13621	-3.95908	1.97518	11.1244	0.000851978	0.0274698			M17326	2.19064	10.439	10.0079	0.00155869	0.0369315
M2828	-3.96558	0.163207	9.32684	0.00225821	0.0483234			M2745	2.18514	10.6285	9.96694	0.00159376	0.037446
M14474	-3.96592	0.542359	9.74756	0.00179561	0.0421452			M292	2.16925	10.3312	9.4627	0.00209692	0.0423079
M16762	-3.96634	1.36007	9.55369	0.00199548	0.0450525			M3530	-2.7329	7.95436	10.2271	0.00138395	0.0355382
M987	-3.99816	0.697689	9.92497	0.00163051	0.0397494			M4058	-3.13254	6.48094	8.84356	0.00294124	0.0489656
M543	-4.01279	0.249022	9.83385	0.0017133	0.0408901			M11954	-3.21396	1.19955	9.13436	0.00250853	0.0454168
M17458	-4.01425	0.980609	13.1324	0.000290227	0.0159012			M10772	-3.28177	1.23524	9.33263	0.00225109	0.0428173
M17782	-4.01824	0.568344	9.43537	0.0021284	0.0466451			M16313	-3.3055	1.18303	8.92986	0.00280547	0.047995
M16269	-4.02614	0.41529	11.4573	0.000712122	0.0248692			M7004	-3.38927	0.611946	9.33063	0.00225354	0.0428173
M10772	-4.03321	1.23524	12.9626	0.000317783	0.0164408			M838	-3.42088	0.632482	9.73562	0.00180731	0.0393523
M406	-4.0347	1.06289	9.76951	0.0017743	0.0419202			M8407	-3.42642	0.923092	9.43714	0.00212635	0.0423638
M11954	-4.04897	1.19955	13.2659	0.000270277	0.0156276			M9646	-3.44933	1.24384	10.022	0.00154678	0.0369315
M6543	-4.05683	0.225821	10.6209	0.00111819	0.0320119			M12103	-3.46583	0.971819	10.167	0.00142976	0.0360692
M8941	-4.05915	1.0353	10.4801	0.0012067	0.0334898			M2030	-3.47656	1.85038	8.96121	0.00275772	0.0474728
M17274	-4.07263	2.16782	11.6693	0.000635384	0.0232298			M5596	-3.49168	1.58794	9.49287	0.00206272	0.0420441
M8842	-4.07743	0.808509	10.5904	0.00113678	0.0322535			M4223	-3.49513	0.704296	8.88012	0.00288292	0.0485786
M5812	-4.08641	1.4478	10.0954	0.00148637	0.0373385			M8095	-3.5114	0.51642	9.65887	0.0018844	0.0402564
M3513	-4.0974	2.62993	9.74281	0.00180025	0.0421452			M13755	-3.52945	4.94107	9.38506	0.0021876	0.0427037
M2228	-4.10538	0.980352	10.5915	0.00113609	0.0322535			M15131	-3.54367	2.55863	8.76441	0.00307165	0.0497583
M13497	-4.11714	0.654814	10.6922	0.00107589	0.0312701			M17274	-3.56405	2.16782	9.35023	0.00222958	0.042757
M958	-4.12411	1.13992	11.6788	0.000632175	0.0232298			M10738	-3.59586	0.592077	9.11087	0.00254095	0.0457479
M15627	-4.14177	1.19148	10.6642	0.00109232	0.0315555			M6955	-3.59648	1.29774	10.2286	0.00138277	0.0355382
M13755	-4.15117	4.94107	12.2435	0.000466892	0.0203338			M958	-3.61506	1.13992	9.37857	0.00219537	0.0427037
M870	-4.17963	1.24053	11.2736	0.000786181	0.0260238			M474	-3.64487	2.5444	8.73926	0.0031143	0.0499822
M6046	-4.18113	1.29302	9.52405	0.00202797	0.0451388			M12289	-3.64564	1.58798	8.91756	0.00282441	0.0480604
M3094	-4.19427	0.865053	10.6514	0.0010999	0.0316307			M2492	-3.64869	1.3548	9.38601	0.00218648	0.0427037
M3903	-4.21705	0.620838	11.4428	0.000717705	0.0248692			M17458	-3.68339	0.980609	11.2657	0.000789539	0.0264882
M2481	-4.21796	4.46845	11.0909	0.000867527	0.0277762			M16652	-3.69696	3.69091	9.19824	0.00242247	0.0446909
M3457	-4.22977	2.43302	12.3525	0.000440401	0.0194373			M4925	-3.70404	1.87838	9.69135	0.00185138	0.0398434
M14405	-4.2309	1.57484	11.6623	0.00063781	0.0232298			M16137	-3.7046	1.82446	10.4291	0.00124047	0.0336914
M8800	-4.23899	0.169892	11.5532	0.000676319	0.024202			M4904	-3.70664	1.04486	9.77982	0.00176438	0.0391256
M14626	-4.24514	1.43947	9.99662	0.00156827	0.0386477			M3870	-3.7145	2.23932	9.56348	0.00198486	0.04136
M11437	-4.24648	3.25029	9.57888	0.00196828	0.044669			M1033	-3.72464	0.703006	11.4402	0.000718703	0.0252269
M8690	-4.24852	0.719821	9.71051	0.00183218	0.0426535			M12660	-3.73257	-0.107361	9.27728	0.00232013	0.0434974
M6775	-4.25211	0.79349	13.986	0.00018418	0.013149			M14061	-3.73666	1.2116	9.37934	0.00219444	0.0427037
M10971	-4.25511	0.382827	10.4191	0.00124717	0.0342394			M3990	-3.74604	2.77477	9.27247	0.00232623	0.0435475
M5191	-4.26087	0.219402	13.2223	0.000276641	0.0156276			M1585	-3.75817	0.216598	9.33259	0.00225113	0.0428173
M17075	-4.26156	-0.31066	11.7492	0.000608697	0.0230922			M588	-3.76199	2.32536	9.54506	0.00200488	0.0415049
M324	-4.27819	1.7826	9.43544	0.00212832	0.0466451			M5147	-3.76496	2.5444	9.55361	0.00199557	0.0414221
M8252	-4.29847	0.859241	11.747	0.000609415	0.0230922			M13783	-3.76569	2.80104	9.28089	0.00231557	0.0434773
M6253	-4.30018	0.678955	13.0889	0.000297048	0.0160859			M7452	-3.78492	0.235504	9.88256	0.00166853	0.0379404
M17758	-4.30105	0.623248	9.83474	0.00171246	0.0408901			M9761	-3.79829	1.77173	9.89269	0.00165936	0.0378674
M11829	-4.3183	0.237504	9.66076	0.00188245	0.0435052			M659	-3.80819	2.38037	9.44969	0.00211184	0.0423638
M11159	-4.34201	2.56199	10.3399	0.00130183	0.0348414			M5637	-3.81471	1.6804	11.0236	0.000899585	0.0286044
M7265	-4.34231	1.71432	12.5584	0.000394426	0.0185687			M15690	-3.81725	2.22955	10.1518	0.00144162	0.0360692
M7077	-4.35292	0.695243	10.3875	0.00126869	0.0344163			M7579	-3.82659	1.93639	9.94762	0.00161057	0.0377016
M2060	-4.35625	1.172	12.2362	0.000468711	0.0203338			M13929	-3.82908	1.71114	9.75182	0.00179145	0.0391256
M7474	-4.35903	-0.112496	9.71801	0.00182471	0.0425575			M1736	-3.85058	2.18792	8.84241	0.0029431	0.0489656
M15690	-4.36174	2.22955	12.5468	0.000396891	0.0186103			M13614	-3.85595	1.46447	9.15456	0.002481	0.0453103
M13326	-4.37565	2.95261	9.39543	0.00217527	0.0470895			M1080	-3.86222	1.79183	9.50937	0.00204425	0.0419675
M11980	-4.38929	2.35916	9.58487	0.00196187	0.0446347			M15906	-3.87416	0.85852	10.9969	0.000912662	0.0286044
M9907	-4.39586	0.537971	11.4352	0.000720674	0.0248692			M10829	-3.88065	0.476003	10.7131	0.00106377	0.031172
M3990	-4.39652	2.77477	11.9719	0.000540075	0.0218387			M1642	-3.8823	0.556445	10.7122	0.00106433	0.031172
M15820	-4.39726	-0.100423	9.41877	0.00214775	0.046798			M12765	-3.8841	0.389662	9.177	0.00245076	0.0449517
M13947	-4.40161	-0.219118	11.0707	0.000877006	0.0279389			M14867	-3.88576	0.652026	11.7949	0.000593932	0.0231579
M3870	-4.40711	2.23932	12.5404	0.000398238	0.0186103			M4897	-3.91103	5.17947	9.06157	0.00261038	0.0464063
M13087	-4.4095	1.09234	12.8796	0.000332189	0.0168225			M10178	-3.91249	2.74109	8.81099	0.00299421	0.0494154
M1535	-4.41445	-0.794361	9.61409	0.0019309	0.0441434			M6739	-3.91706	3.25909	10.3485	0.0012958	0.0341741
M5813	-4.42581	0.905735	11.0285	0.000897235	0.0282459			M482	-3.9221	6.41372	10.262	0.00135795	0.035012
M6072	-4.4268	-0.886254	9.64225	0.00190152	0.0437075			M2829	-3.93394	1.64374	11.0132	0.000904661	0.0286044
M196	-4.42705	2.7761	9.90847	0.0016452	0.0397494			M10044	-3.93495	0.36032	8.77553	0.00305299	0.0497583
M14460	-4.42835	2.76709	11.7926	0.000594669	0.0229056			M10971	-3.93526	0.382827	9.02676	0.00266056	0.0469049
M8966	-4.4298	-0.216244	11.6957	0.00062645	0.0232298			M5813	-3.93662	0.905735	9.16556	0.00246613	0.0451035
M14725	-4.43487	2.30806	9.86307	0.0016863	0.040519			M5481	-3.93785	1.52882	8.92668	0.00281035	0.048014
M13902	-4.43653	1.96285	13.374	0.000255133	0.0154797			M4404	-3.9408	2.12844	10.2215	0.00138809	0.0355727
M9411	-4.43682	0.520696	12.7832	0.000349741	0.0172308			M9037	-3.95301	2.68484	10.2803	0.00134457	0.0348083
M17010	-4.4383	0.555519	11.7355	0.000613192	0.0230922			M4278	-3.96683	2.15022	9.04944	0.00262776	0.04665
M13644	-4.45687	0.228517	12.1507	0.000490686	0.0210713			M7211	-3.97047	0.757398	10.1983	0.00140572	0.0357215
M5352	-4.46187	1.34595	14.3722	0.000149999	0.0120495			M13701	-3.97681	1.25678	12.4408	0.000420045	0.020501
M6695	-4.46664	3.43097	10.7868	0.00102228	0.0303603			M12074	-3.98644	-0.323702	8.76726	0.00306687	0.0497583
M17119	-4.46785	1.44019	10.4328	0.001238	0.034061			M3191	-3.99042	6.44681	11.4248	0.000724694	0.0253065
M11202	-4.46917	2.35626	10.5366	0.00117036	0.0327185			M14235	-3.9919	1.05421	10.7426	0.001047	0.0310271
M8493	-4.48459	-0.143687	11.7385	0.000612189	0.0230922			M406	-3.99543	1.06289	9.48879	0.00206731	0.0420441
M881	-4.48651	4.9164	11.2364	0.000802096	0.0264209			M8349	-4.00065	1.13634	11.3864	0.00073985	0.0254857
M9591	-4.48683	-0.152437	11.4344	0.000720984	0.0248692			M7084	-4.0011	1.86154	9.18177	0.00244437	0.0449517
M12973	-4.48839	-0.100916	11.2766	0.000784889	0.0260238			M17534	-4.00983	2.64805	10.4728	0.00121146	0.0330449
M1513	-4.48975	0.890157	12.8603	0.000335618	0.0168618			M2560	-4.02066	1.05094	10.4017	0.00125901	0.0338182
M6415	-4.49401	0.796126	11.7117	0.000621083	0.0231513			M7125	-4.02489	0.422825	9.38243	0.00219075	0.0427037
M16966	-4.50117	0.663005	11.8711	0.000570126	0.0224033			M12210	-4.02586	1.28419	10.0258	0.0015436	0.0369315
M4851	-4.50221	1.64845	10.0159	0.00155191	0.0383781			M10585	-4.02623	-0.302845	9.21937	0.00239468	0.0443068
M16373	-4.51062	3.80947	9.43187	0.00213247	0.0466536			M9472	-4.02798	0.486613	12.1795	0.000483189	0.0219094
M5216	-4.51211	1.87329	10.7287	0.00105485	0.0308234			M5227	-4.03594	0.11915	9.76817	0.00177559	0.0391256
M12493	-4.52095	1.83355	11.6624	0.00063776	0.0232298			M4160	-4.04351	3.7592	8.74424	0.00310582	0.049909
M17621	-4.52325	2.02573	14.0492	0.000178087	0.0129694			M13619	-4.04633	0.794812	9.17713	0.00245058	0.0449517
M7421	-4.52527	0.992328	13.1654	0.000285173	0.015829			M16733	-4.05613	3.16324	9.38942	0.00218241	0.0427037
M11984	-4.52851	2.06512	10.89	0.000966852	0.0294716			M15129	-4.06427	2.70158	9.18644	0.00243815	0.0449149
M8139	-4.5315	0.388081	13.0856	0.000297579	0.0160859			M15742	-4.06996	4.18591	11.138	0.000845773	0.0277794
M400	-4.53166	2.10267	11.4098	0.000730558	0.0248821			M5863	-4.09857	-0.242221	9.63133	0.00191286	0.0406595
M490	-4.53758	1.16824	10.3168	0.00131828	0.0350558			M9294	-4.10556	1.99548	9.72459	0.00181819	0.0393713
M6168	-4.53973	1.56459	9.9108	0.00164312	0.0397494			M9388	-4.1103	0.172249	9.90007	0.00165273	0.0378235
M17468	-4.53992	4.69533	12.6809	0.000369404	0.0177247			M13773	-4.11512	1.56592	11.6766	0.000632907	0.0239099
M14737	-4.54232	1.96515	10.3564	0.00129026	0.0348206			M1978	-4.11973	3.04496	8.90059	0.00285078	0.0482925
M11278	-4.54479	-0.781804	10.1198	0.00146688	0.0371424			M10370	-4.12514	2.19604	9.38637	0.00218605	0.0427037
M4074	-4.54864	-0.14302	10.6894	0.00107752	0.0312701			M4467	-4.12555	1.85975	11.1839	0.000825108	0.0272604
M9566	-4.55254	0.291128	12.24	0.000467752	0.0203338			M17621	-4.12662	2.02573	12.1174	0.000499533	0.0219094
M9464	-4.56189	1.00065	11.3244	0.000764943	0.0257508			M14173	-4.12941	1.77414	9.82545	0.00172114	0.0387847
M11207	-4.56516	1.40111	11.0228	0.000899975	0.0282459			M9510	-4.13344	-0.199538	10.0141	0.00155343	0.0369315
M13884	-4.56987	1.62061	11.1384	0.000845604	0.0273498			M14978	-4.13808	0.798077	12.2556	0.000463862	0.0212858
M2562	-4.57031	0.89761	14.8134	0.000118691	0.0110123			M3962	-4.14195	1.80001	8.7863	0.00303502	0.0497583
M10268	-4.57137	0.915809	14.0598	0.000177086	0.0129694			M14291	-4.14424	2.45262	9.23594	0.0023731	0.0441001
M972	-4.57175	0.487628	9.53976	0.00201068	0.0450754			M3903	-4.15261	0.620838	10.7686	0.00103237	0.0308038
M13614	-4.59421	1.46447	12.0342	0.000522334	0.0216766			M9155	-4.15336	0.888907	9.62298	0.00192157	0.0407765
M8175	-4.60051	0.337223	12.0566	0.000516104	0.0216766			M400	-4.15428	2.10267	9.92464	0.00163081	0.0377325
M2503	-4.60215	-0.0582861	11.7571	0.000606128	0.0230922			M11747	-4.16782	2.0893	9.12839	0.00251674	0.0454407
M10178	-4.60546	2.74109	11.4059	0.000732115	0.0248821			M6278	-4.19594	1.90018	9.70927	0.00183341	0.0396075
M8970	-4.60551	0.885904	14.0443	0.000178557	0.0129694			M13794	-4.19641	0.329814	8.7643	0.00307184	0.0497583
M16137	-4.62074	1.82446	14.6669	0.000128282	0.0114028			M9916	-4.19699	1.59665	10.8954	0.000964025	0.0295984
M9155	-4.62231	0.888907	11.6029	0.000658476	0.0237107			M14839	-4.19851	1.0956	9.91793	0.00163676	0.0377325
M1738	-4.62513	0.44727	13.5118	0.000237073	0.0146997			M10057	-4.20094	2.13315	8.91144	0.00283389	0.0481092
M6133	-4.63115	-0.34065	10.2716	0.0013509	0.0355514			M17128	-4.20196	0.289769	9.92612	0.00162949	0.0377325
M13492	-4.63956	1.77847	12.4278	0.00042299	0.0189987			M6421	-4.20231	4.46182	9.07132	0.00259649	0.0463539
M12411	-4.64377	0.751131	13.2752	0.00026894	0.0156276			M3954	-4.2057	3.31964	9.26107	0.00234076	0.0436907
M2205	-4.6488	1.84809	11.8678	0.000571124	0.0224033			M11303	-4.20663	2.39065	8.93476	0.00279794	0.047995
M8598	-4.65397	0.375979	9.61839	0.00192639	0.0441195			M16636	-4.20952	1.30915	12.6619	0.000373192	0.0201002
M9757	-4.65434	-0.0299561	10.4653	0.00121638	0.033685			M16455	-4.21149	0.401665	10.3035	0.00132776	0.0345137
M15860	-4.66804	0.651048	11.8855	0.000565723	0.0224033			M8493	-4.21659	-0.143687	10.3692	0.00128135	0.0340025
M7125	-4.68862	0.422825	11.8475	0.000577382	0.0225126			M407	-4.22081	0.373239	10.9903	0.000915899	0.0286044
M16628	-4.6964	1.50451	12.2623	0.000462196	0.0202585			M6170	-4.2265	5.18169	9.21998	0.00239388	0.0443068
M10434	-4.70092	3.6862	11.4289	0.00072309	0.0248692			M2244	-4.23378	1.18617	8.98763	0.00271813	0.0473601
M9644	-4.7011	0.419029	12.5075	0.000405318	0.018725			M7168	-4.23719	4.36602	9.37694	0.00219732	0.0427037
M17282	-4.71269	0.0216737	11.2005	0.000817757	0.02679			M15169	-4.23727	4.54827	9.04042	0.00264075	0.046685
M4090	-4.72402	-0.500178	10.3396	0.00130208	0.0348414			M5018	-4.24606	3.0999	9.64565	0.001898	0.040479
M15825	-4.72447	-0.014766	11.6877	0.000629152	0.0232298			M12574	-4.24763	1.27582	11.545	0.000679306	0.0246445
M9202	-4.72474	0.29309	9.2873	0.00230748	0.0491367			M13091	-4.24858	1.11864	11.9235	0.000554292	0.0226128
M13260	-4.73061	0.499959	10.3775	0.00127563	0.0344991			M6285	-4.24943	0.945572	10.5051	0.00119048	0.0328962
M1650	-4.73297	2.61898	12.9166	0.00032568	0.0166254			M7077	-4.25176	0.695243	9.69021	0.00185252	0.0398434
M7889	-4.74279	-0.00307024	11.1831	0.000825469	0.0269234			M2562	-4.25778	0.89761	13.0523	0.000302917	0.0185114
M15869	-4.74736	2.38799	10.2205	0.00138888	0.0360988			M870	-4.26279	1.24053	11.3995	0.000734651	0.0253754
M12289	-4.75413	1.58798	13.2895	0.0002669	0.0156276			M9264	-4.26591	3.76981	9.4781	0.00207939	0.0420823
M10395	-4.75653	-0.00891374	11.7305	0.000614831	0.0230922			M1650	-4.2711	2.61898	10.9855	0.000918273	0.0286082
M14598	-4.75663	1.16927	11.868	0.000571063	0.0224033			M4074	-4.27382	-0.14302	9.44938	0.00211221	0.0423638
M14317	-4.76191	1.95564	14.4613	0.000143072	0.0120495			M8060	-4.27482	-0.113646	9.4902	0.00206573	0.0420441
M5838	-4.76675	-0.581596	9.58388	0.00196293	0.0446347			M12362	-4.27799	3.68064	10.0247	0.00154452	0.0369315
M10320	-4.77323	0.444204	11.4352	0.000720642	0.0248692			M8370	-4.282	2.47891	8.75626	0.00308542	0.0497583
M2605	-4.78177	2.98336	12.0655	0.000513645	0.0216766			M8175	-4.28211	0.337223	10.544	0.00116568	0.0326803
M13380	-4.79015	0.0221865	12.7152	0.000362698	0.0175721			M8882	-4.28299	1.36205	10.1572	0.00143736	0.0360692
M10301	-4.79757	-0.633185	10.4601	0.00121983	0.033707			M11917	-4.28549	1.40488	9.33545	0.00224762	0.0428173
M10089	-4.79967	4.95668	13.0359	0.00030558	0.016134			M8815	-4.28964	0.961586	11.4962	0.000697393	0.0250444
M9454	-4.80092	1.22165	13.03	0.000306541	0.016134			M12730	-4.28987	2.47495	9.31481	0.0022731	0.042996
M16300	-4.81088	0.843803	15.4066	8.66852e-05	0.00910624			M10400	-4.29883	-0.10117	10.4029	0.00125817	0.0338182
M5185	-4.81109	1.75433	14.9808	0.000108611	0.0104909			M16882	-4.30114	4.51674	9.93942	0.00161777	0.037709
M14444	-4.81275	0.82035	11.2938	0.000777655	0.0258764			M6897	-4.30158	0.339447	12.1495	0.000491017	0.0219094
M6608	-4.8156	1.4205	15.4228	8.59449e-05	0.00910372			M17758	-4.30344	0.623248	9.57524	0.00197219	0.0411684
M4022	-4.82459	1.09243	12.0571	0.000515943	0.0216766			M11278	-4.30433	-0.781804	8.91083	0.00283485	0.0481092
M9604	-4.8376	0.748736	10.7888	0.00102115	0.0303603			M6844	-4.31143	2.38047	9.50224	0.00205221	0.0420058
M8130	-4.85646	0.395802	11.5183	0.00068914	0.0244235			M13330	-4.31579	1.50018	9.0337	0.00265047	0.0467919
M9723	-4.86135	-0.507616	10.8382	0.000994277	0.0299485			M9115	-4.31956	1.6596	11.6613	0.000638127	0.0239099
M1284	-4.86727	1.68804	14.6469	0.000129647	0.0114441			M534	-4.32081	5.36453	9.73141	0.00181146	0.0393523
M12675	-4.87059	-0.51885	10.7898	0.00102063	0.0303603			M1320	-4.32135	1.53038	10.1263	0.00146168	0.0362878
M5083	-4.87318	-0.485535	10.9183	0.000952176	0.0293765			M6253	-4.32154	0.678955	12.7512	0.00035578	0.0194927
M3571	-4.87385	-0.514677	11.5841	0.000665173	0.0238842			M12095	-4.32284	0.423061	11.4358	0.000720428	0.0252269
M13876	-4.87702	0.613549	13.0262	0.00030717	0.016134			M11204	-4.3239	0.740094	10.6745	0.00108625	0.0314516
M7838	-4.87914	1.10218	12.641	0.000377373	0.018033			M5345	-4.3361	-0.628754	8.89901	0.00285325	0.0482925
M13325	-4.89132	3.4706	12.0084	0.000529619	0.0216766			M617	-4.33737	1.10846	9.4408	0.00212211	0.0423638
M7575	-4.89277	0.186221	12.1717	0.0004852	0.0209064			M13589	-4.34058	1.12801	9.84544	0.00170253	0.0384726
M13091	-4.89309	1.11864	14.9185	0.000112255	0.0107284			M5298	-4.34158	4.41076	8.98643	0.00271992	0.0473601
M9582	-4.89984	1.15862	12.1076	0.000502176	0.02142			M6952	-4.34181	4.12053	9.39929	0.0021707	0.0427037
M13638	-4.90174	-0.483457	10.9278	0.000947334	0.0292982			M960	-4.34539	3.44303	8.98139	0.00272743	0.0474259
M5645	-4.90438	0.644577	10.1036	0.00147981	0.037321			M14526	-4.35054	0.320596	9.70735	0.00183532	0.0396075
M11827	-4.90701	0.16948	12.9526	0.000319478	0.0164408			M4204	-4.35739	2.18129	10.3327	0.00130695	0.0342141
M856	-4.90803	1.36613	13.0505	0.000303205	0.016134			M7837	-4.37325	0.739165	10.7344	0.00105159	0.0310526
M14176	-4.90931	2.73384	13.9374	0.000189004	0.013149			M16269	-4.37452	0.41529	12.2204	0.000472702	0.0215359
M5748	-4.92458	3.44067	12.3763	0.000434816	0.0192577			M8712	-4.38679	2.0913	10.7078	0.00106683	0.0311734
M6189	-4.92544	1.45302	13.3238	0.000262063	0.0156276			M3021	-4.39486	0.800577	10.0311	0.00153918	0.0369315
M9205	-4.93036	5.79387	9.77047	0.00177337	0.0419202			M1284	-4.39556	1.68804	12.4781	0.000411743	0.020501
M5250	-4.93248	1.311	10.1462	0.00144603	0.0367948			M13588	-4.397	1.60953	10.8529	0.000986436	0.029925
M9162	-4.9377	-0.516995	11.7935	0.000594365	0.0229056			M15405	-4.41009	1.58756	9.4005	0.00216926	0.0427037
M14348	-4.9747	3.30038	14.4436	0.000144421	0.0120495			M3528	-4.4141	3.88429	9.13195	0.00251184	0.0454168
M9820	-4.98044	1.02378	9.52896	0.00202254	0.0451388			M16130	-4.41513	1.03392	11.8322	0.000582167	0.022948
M5561	-4.98285	-0.457012	12.1787	0.000483388	0.0208991			M9853	-4.41672	1.74606	11.5675	0.000671148	0.0245849
M5583	-4.98375	2.33007	9.91642	0.00163811	0.0397494			M6502	-4.42093	-0.00234795	12.1231	0.000497999	0.0219094
M8610	-4.9849	0.763381	12.4775	0.000411879	0.0187436			M2373	-4.42141	0.344383	9.24316	0.00236377	0.0440555
M16130	-4.98607	1.03392	14.219	0.000162722	0.0123854			M4414	-4.43097	0.0676992	12.1125	0.000500859	0.0219094
M8166	-4.98817	1.54699	11.4295	0.000722891	0.0248692			M17172	-4.44597	2.34383	10.4843	0.00120396	0.0330449
M1585	-5.01272	0.216598	14.0763	0.000175545	0.0129694			M10173	-4.44821	4.51149	10.3761	0.00127657	0.0340025
M13312	-5.02104	0.808351	9.9954	0.00156932	0.0386477			M7737	-4.45055	0.448619	10.1411	0.00145003	0.0360692
M17102	-5.02376	-0.395111	11.9242	0.000554088	0.0221478			M2415	-4.45363	1.45333	9.01208	0.00268201	0.0470327
M9036	-5.02558	1.13248	11.4817	0.000702841	0.0248161			M9440	-4.45569	3.36204	9.82042	0.00172585	0.0387847
M17448	-5.02587	2.15375	13.7297	0.000211091	0.0139339			M8701	-4.46602	0.25492	8.87358	0.00289327	0.0485786
M9314	-5.03281	-0.241442	10.3858	0.00126986	0.0344163			M7689	-4.46844	2.46678	8.8087	0.00299798	0.0494154
M17211	-5.03677	-0.404995	11.8718	0.000569893	0.0224033			M8842	-4.46991	0.808509	11.6242	0.000650991	0.0241246
M6673	-5.04486	3.0666	10.8507	0.000987588	0.0298886			M15919	-4.47035	3.98022	9.08465	0.00257764	0.0461471
M4466	-5.04605	1.62658	13.2104	0.000278399	0.0156276			M17818	-4.47358	1.07737	13.8004	0.000203296	0.0160757
M11204	-5.04807	0.740094	13.5014	0.000238385	0.0147093			M8421	-4.48325	3.51635	8.86695	0.0029038	0.0486301
M10226	-5.05021	1.66888	14.3762	0.000149684	0.0120495			M979	-4.49998	1.34612	10.3446	0.00129857	0.0341741
M1874	-5.05387	-0.41563	11.9627	0.00054275	0.0218387			M11046	-4.50608	1.31976	13.5758	0.000229117	0.0168341
M4197	-5.09533	5.85958	14.016	0.000181262	0.0130778			M1843	-4.51026	3.2777	8.87625	0.00288904	0.0485786
M6897	-5.101	0.339447	15.476	8.35591e-05	0.00905574			M9080	-4.51047	1.08514	12.0309	0.000523262	0.0223687
M4130	-5.10862	2.74665	11.1084	0.000859355	0.027584			M5874	-4.51383	-0.406322	9.60982	0.00193539	0.0407974
M6190	-5.11375	0.60909	11.6322	0.000648182	0.0234064			M2582	-4.51736	1.08315	10.3248	0.00131254	0.034258
M17773	-5.1225	0.697128	11.7986	0.000592744	0.0229056			M6528	-4.52739	3.5655	9.1407	0.00249986	0.0453788
M13724	-5.1295	2.01035	14.267	0.000158622	0.0122197			M14557	-4.53302	-0.583153	10.6582	0.00109583	0.0316555
M8102	-5.14159	1.58194	9.39419	0.00217674	0.0470895			M11581	-4.54044	1.35921	11.012	0.000905234	0.0286044
M11002	-5.14533	-0.328198	12.0329	0.000522686	0.0216766			M7214	-4.54435	0.506768	8.7369	0.00311833	0.0499838
M13553	-5.14591	-0.287471	12.4402	0.000420183	0.0189987			M11757	-4.54694	0.476558	11.8808	0.000567143	0.0226497
M8775	-5.15111	1.0774	11.3167	0.000768147	0.0257508			M13708	-4.54959	1.76552	8.81715	0.00298412	0.0493253
M11044	-5.15195	0.345568	13.8271	0.000200426	0.0135511			M10562	-4.55155	3.12826	11.7122	0.000620932	0.0235602
M453	-5.1528	2.1269	11.3016	0.000774409	0.025836			M15401	-4.55672	2.03984	9.34696	0.00223355	0.042757
M8150	-5.15421	-0.257655	12.7106	0.000363579	0.0175721			M13628	-4.5571	1.18059	9.87551	0.00167493	0.038018
M16315	-5.15887	0.297429	13.2402	0.000274015	0.0156276			M8035	-4.56966	2.80731	9.0867	0.00257475	0.0461471
M12074	-5.16852	-0.323702	12.5757	0.000390796	0.0184662			M5201	-4.57022	1.30917	8.75437	0.00308861	0.0497583
M13934	-5.17028	1.48781	10.451	0.00122585	0.0337999			M2991	-4.5785	2.58526	9.78745	0.00175707	0.0391141
M12405	-5.17163	0.805036	15.4833	8.32392e-05	0.00905574			M9551	-4.5797	4.61632	10.856	0.000984783	0.029925
M6333	-5.18111	0.839534	16.4917	4.88646e-05	0.00678556			M11146	-4.58029	0.127463	11.6158	0.000653952	0.0241639
M13240	-5.19151	2.80876	10.5353	0.00117118	0.0327185			M10096	-4.58743	2.05281	9.3225	0.00226357	0.0428795
M758	-5.19476	3.42543	12.7478	0.000356427	0.0174925			M6818	-4.59162	3.86968	12.0383	0.000521179	0.0223687
M12258	-5.21228	2.2267	10.5932	0.00113506	0.0322535			M1954	-4.60212	1.14621	8.75892	0.00308092	0.0497583
M13624	-5.21786	-0.286794	12.7884	0.000348776	0.0172308			M1728	-4.60323	1.25901	13.3932	0.000252532	0.0175029
M4867	-5.22143	3.07356	10.2169	0.00139158	0.0360988			M6189	-4.61191	1.45302	11.9321	0.000551743	0.0226128
M11764	-5.22589	3.7865	9.25549	0.00234791	0.049577			M6251	-4.61237	0.867733	12.5337	0.00039968	0.020501
M16982	-5.22665	0.949169	9.39997	0.00216989	0.0470895			M8050	-4.61308	-0.544187	10.4769	0.00120876	0.0330449
M15712	-5.229	1.662	14.975	0.000108945	0.0104909			M10830	-4.61841	2.82023	11.0547	0.000884618	0.028539
M4404	-5.23567	2.12844	15.672	7.53317e-05	0.00878678			M13353	-4.61889	4.83635	9.01396	0.00267925	0.0470327
M1937	-5.23727	1.77804	13.4811	0.000240974	0.0147972			M358	-4.61995	1.55532	10.408	0.00125471	0.0338182
M14095	-5.23994	2.84494	14.3146	0.00015466	0.0120606			M13661	-4.63094	-0.344532	10.8145	0.00100707	0.030249
M17862	-5.24033	0.384519	13.5819	0.000228378	0.0142352			M3984	-4.63123	2.72875	9.29872	0.00229314	0.0433107
M13531	-5.24304	0.561643	13.8484	0.000198167	0.0135425			M4648	-4.63795	-0.51095	10.0584	0.00151652	0.0369315
M16005	-5.25986	4.47823	10.5848	0.0011402	0.0322787			M12531	-4.63817	0.602614	13.722	0.000211963	0.0162153
M6966	-5.26812	0.924129	13.7671	0.000206927	0.0138434			M5280	-4.64008	-0.537358	9.23204	0.00237816	0.0441296
M8326	-5.27005	2.37649	15.4942	8.2757e-05	0.00905574			M9297	-4.64423	0.984874	11.1043	0.000861279	0.0280711
M8874	-5.27777	1.0058	14.3943	0.000148251	0.0120495			M15560	-4.64854	-0.460311	10.5207	0.00118046	0.0327312
M5863	-5.27853	-0.242221	13.6192	0.000223887	0.0142352			M6748	-4.6526	2.20229	9.85951	0.00168956	0.0382817
M12210	-5.2811	1.28419	14.8402	0.000117015	0.0110123			M4670	-4.65462	0.646739	12.8503	0.00033742	0.0190314
M7329	-5.28214	2.47338	10.2435	0.00137169	0.0358306			M12582	-4.66906	1.24518	12.5427	0.000397765	0.020501
M9113	-5.28374	1.45948	11.9464	0.000547535	0.0219549			M9162	-4.66979	-0.516995	10.3961	0.00126283	0.0338182
M6251	-5.28975	0.867733	15.33	9.02706e-05	0.00932869			M15814	-4.67372	0.974679	12.7676	0.000352668	0.0194059
M5146	-5.29194	1.83395	9.90532	0.00164802	0.0397494			M17459	-4.68585	4.62276	9.08526	0.00257678	0.0461471
M14894	-5.29471	2.28574	9.70148	0.00184119	0.042785			M5242	-4.68835	0.270825	12.9261	0.000324027	0.0190314
M12038	-5.29656	-0.23316	13.0709	0.000299926	0.0160859			M12972	-4.68914	1.54513	9.57808	0.00196915	0.0411684
M5154	-5.30367	-0.127657	13.1434	0.000288528	0.0158769			M5534	-4.69188	2.45966	9.75185	0.00179143	0.0391256
M6279	-5.30645	1.62373	13.0376	0.000305296	0.016134			M9621	-4.69529	4.21463	10.8109	0.00100902	0.030249
M9017	-5.31687	0.49107	13.7374	0.000210224	0.0139339			M16968	-4.69604	-0.47984	9.99871	0.0015665	0.0369614
M17827	-5.34329	-0.190826	11.992	0.000534303	0.0217677			M12521	-4.69645	0.160233	11.1278	0.000850451	0.027861
M13989	-5.35498	0.531796	15.4561	8.44427e-05	0.00905574			M359	-4.69794	0.214334	12.9787	0.000315051	0.0190314
M12660	-5.35521	-0.107361	14.7067	0.000125597	0.0112427			M9723	-4.699	-0.507616	9.99433	0.00157023	0.0369614
M9832	-5.35839	0.592453	16.6714	4.44451e-05	0.00672549			M16024	-4.70068	4.95704	9.14331	0.00249629	0.0453788
M1642	-5.35854	0.556445	16.518	4.819e-05	0.00678556			M3264	-4.70189	2.94057	12.1098	0.000501585	0.0219094
M7619	-5.3758	0.473328	13.696	0.000214915	0.0140092			M5083	-4.71058	-0.485535	10.0692	0.00150766	0.0369246
M14620	-5.38318	2.49025	11.1817	0.000826065	0.0269234			M6386	-4.71133	6.40901	10.5184	0.00118194	0.0327312
M10738	-5.38771	0.592077	15.9339	6.5594e-05	0.00794063			M4921	-4.7188	1.93858	9.75199	0.00179129	0.0391256
M5721	-5.38849	3.31607	14.3517	0.000151645	0.0120495			M8834	-4.72066	3.31071	11.1208	0.000853644	0.0278937
M3856	-5.39103	2.54439	13.2932	0.000266376	0.0156276			M17521	-4.72417	0.98798	12.8181	0.000343289	0.0191384
M4361	-5.40598	1.24008	12.503	0.000406292	0.018725			M6494	-4.72747	2.72107	8.87488	0.00289121	0.0485786
M4033	-5.42197	0.651816	14.0072	0.000182108	0.0130778			M15608	-4.72918	3.24512	8.8589	0.00291663	0.0487166
M16708	-5.42266	0.607345	16.5225	4.80758e-05	0.00678556			M6543	-4.73242	0.225821	12.4255	0.000423507	0.0205465
M5264	-5.42373	1.56041	16.0681	6.11062e-05	0.00772879			M14648	-4.73381	2.95005	11.7506	0.000608233	0.0234942
M7840	-5.42848	1.40806	13.5898	0.000227422	0.0142352			M16695	-4.73482	2.82788	13.06	0.000301666	0.0185114
M9629	-5.43153	0.06068	10.2181	0.00139072	0.0360988			M4505	-4.73482	0.735143	13.3975	0.000251962	0.0175029
M10207	-5.43297	0.545478	13.3938	0.000252457	0.0154278			M9540	-4.73623	4.78566	8.87129	0.00289691	0.0485786
M12531	-5.43735	0.602614	17.0991	3.548e-05	0.00594191			M16288	-4.73744	2.33079	8.85909	0.00291633	0.0487166
M4905	-5.44681	3.18503	10.0802	0.00149871	0.0375001			M17832	-4.73761	1.0873	12.7801	0.000350328	0.0193659
M5752	-5.45643	5.13259	12.0468	0.000518814	0.0216766			M8126	-4.75385	1.64444	10.6006	0.0011305	0.0320039
M2566	-5.46165	3.95039	13.9363	0.00018911	0.013149			M10171	-4.75715	4.295	9.67215	0.00187082	0.0400805
M11581	-5.46643	1.35921	14.4488	0.000144024	0.0120495			M11435	-4.75715	3.74686	9.04339	0.00263646	0.046685
M9760	-5.48421	0.566027	15.1975	9.68332e-05	0.00976863			M9120	-4.75754	1.59341	11.8178	0.000586663	0.022948
M8021	-5.48846	1.31918	14.493	0.000140685	0.0120495			M4191	-4.76662	3.88625	11.9135	0.000557277	0.0226128
M10864	-5.48946	1.05751	11.4208	0.000726264	0.0248821			M9564	-4.76759	-0.338443	9.13869	0.0025026	0.0453788
M8700	-5.50773	0.615197	14.2678	0.000158556	0.0122197			M9166	-4.77089	0.652537	9.55909	0.00198962	0.0413912
M15672	-5.52007	3.11172	13.0954	0.000296029	0.0160859			M3891	-4.77687	3.88844	13.1477	0.000287875	0.0182779
M1944	-5.54026	2.93165	16.3457	5.27752e-05	0.00706132			M15718	-4.79433	3.1445	9.47696	0.00208068	0.0420823
M7973	-5.54415	2.94737	12.0125	0.000528455	0.0216766			M5352	-4.79535	1.34595	15.4316	8.55451e-05	0.0122963
M12264	-5.54781	0.645102	13.5896	0.000227443	0.0142352			M14191	-4.79814	1.13737	11.7673	0.000602817	0.023361
M14771	-5.56942	0.502925	10.8647	0.000980153	0.0297344			M6534	-4.80326	2.28552	13.2351	0.000274749	0.0178181
M11817	-5.58887	0.0930586	13.6106	0.000224907	0.0142352			M13534	-4.80459	1.60472	10.609	0.00112538	0.0320016
M13042	-5.59871	1.24427	10.9653	0.000928339	0.0289929			M9522	-4.80483	0.314859	10.8975	0.000962925	0.0295984
M11825	-5.60263	0.816123	13.9147	0.000191292	0.0132148			M3369	-4.80522	3.05319	13.921	0.000190656	0.0158112
M9638	-5.61024	0.815657	14.3897	0.000148613	0.0120495			M6381	-4.80532	4.76083	11.0183	0.000902157	0.0286044
M14763	-5.61222	3.07914	10.7685	0.00103241	0.0304477			M1874	-4.80568	-0.41563	10.6759	0.00108538	0.0314516
M10540	-5.63062	0.0486995	15.4752	8.35949e-05	0.00905574			M5065	-4.8105	0.253207	12.1534	0.000489975	0.0219094
M3991	-5.63267	2.13098	13.6562	0.00021951	0.0142352			M9700	-4.82045	1.08711	12.4517	0.000417605	0.020501
M12275	-5.63776	0.0828804	14.471	0.000142337	0.0120495			M13087	-4.82614	1.09234	14.0787	0.00017532	0.015642
M17214	-5.64714	0.137378	14.2517	0.000159916	0.0122452			M10828	-4.82673	0.784177	12.6414	0.000377296	0.0201505
M4582	-5.64854	0.108683	13.9407	0.000188671	0.013149			M3758	-4.82973	2.85764	9.26707	0.0023331	0.0436119
M6916	-5.65609	1.52376	16.4821	4.91127e-05	0.00678556			M951	-4.83743	0.511811	12.9385	0.000321898	0.0190314
M13773	-5.67949	1.56592	18.3521	1.83617e-05	0.0046679			M12145	-4.83882	0.743753	9.99463	0.00156998	0.0369614
M14173	-5.68491	1.77414	15.6089	7.78857e-05	0.00891897			M15383	-4.8401	0.902552	9.47542	0.00208243	0.0420823
M12790	-5.69582	0.771723	13.1976	0.000280315	0.0156276			M7207	-4.84184	2.31123	13.1964	0.000280488	0.0180979
M11917	-5.71879	1.40488	13.8364	0.000199434	0.0135511			M10052	-4.84469	2.38492	9.42092	0.00214524	0.0426065
M11469	-5.73108	0.159872	14.1029	0.00017308	0.0128656			M17862	-4.84525	0.384519	11.7193	0.00061855	0.0235542
M11146	-5.74814	0.127463	15.6543	7.60401e-05	0.00878678			M5351	-4.84711	3.57338	11.032	0.00089551	0.0286044
M12417	-5.74918	0.918422	16.0109	6.29801e-05	0.00784844			M14738	-4.85354	2.17995	9.67	0.00187301	0.0400805
M8737	-5.75731	1.81197	15.4486	8.47796e-05	0.00905574			M6415	-4.85376	0.796126	12.5207	0.000402478	0.020501
M6364	-5.76019	1.54789	16.0586	6.1412e-05	0.00772879			M16610	-4.85665	1.88605	10.4216	0.0012455	0.0337559
M1019	-5.76686	1.54151	12.5085	0.000405111	0.018725			M9638	-4.85752	0.815657	11.8176	0.000586745	0.022948
M9748	-5.77013	2.12742	12.5951	0.000386758	0.0183436			M4554	-4.86998	2.95801	10.0231	0.00154591	0.0369315
M11046	-5.77622	1.31976	19.0541	1.27067e-05	0.00414142			M14887	-4.8904	2.51087	11.558	0.000674583	0.0246397
M6863	-5.77704	1.24221	17.0965	3.55271e-05	0.00594191			M15888	-4.89062	5.70181	10.9263	0.000948093	0.0293217
M14596	-5.77927	2.59616	12.9555	0.000318976	0.0164408			M6446	-4.89369	5.27885	15.6903	7.46052e-05	0.0118149
M8065	-5.78697	1.99266	12.0123	0.000528495	0.0216766			M13568	-4.89392	1.52809	10.01	0.00155697	0.0369315
M9378	-5.78768	1.08809	11.8093	0.000589362	0.0229056			M5983	-4.90165	1.98493	11.6011	0.000659125	0.0242844
M8793	-5.79626	2.78449	11.4362	0.000720257	0.0248692			M13624	-4.91063	-0.286794	11.1897	0.000822544	0.0272604
M12521	-5.82929	0.160233	14.7274	0.000124225	0.0112108			M5747	-4.91282	2.53218	10.8615	0.000981817	0.029925
M15897	-5.83531	2.31154	16.5565	4.72228e-05	0.00678556			M13553	-4.91368	-0.287471	11.2083	0.000814312	0.0270961
M3877	-5.83923	1.03436	11.4268	0.000723909	0.0248692			M9257	-4.91471	2.55178	10.2161	0.00139222	0.0356067
M7452	-5.85483	0.235504	17.1655	3.42594e-05	0.00594191			M5832	-4.91581	6.07348	10.5268	0.00117657	0.032725
M13693	-5.88046	0.279219	15.2599	9.36839e-05	0.00952653			M12993	-4.92801	1.69231	10.1954	0.00140795	0.0357215
M15814	-5.88811	0.974679	17.3319	3.13873e-05	0.00594191			M10534	-4.9315	1.22427	12.9386	0.000321867	0.0190314
M538	-5.89741	1.46612	16.3748	5.19727e-05	0.00702792			M11084	-4.95793	2.18922	11.1448	0.000842686	0.0277497
M14526	-5.89973	0.320596	14.1276	0.000170817	0.0127721			M9754	-4.95893	3.63948	11.3696	0.000746555	0.0256472
M3010	-5.9296	0.39698	14.1696	0.000167046	0.0126388			M2282	-4.96968	3.94802	10.1878	0.00141376	0.0357975
M10044	-5.93428	0.36032	14.781	0.000120745	0.0110416			M2867	-4.97328	0.471715	11.4907	0.000699454	0.0250444
M9080	-5.93722	1.08514	17.1498	3.4545e-05	0.00594191			M14310	-4.98483	3.78326	13.7298	0.000211084	0.0162153
M8406	-5.94177	0.243237	15.9553	6.48569e-05	0.00792689			M9395	-4.98801	1.02297	9.43388	0.00213013	0.0423726
M3932	-5.94507	3.37614	9.23025	0.00238049	0.0499314			M13599	-4.9886	0.882198	13.615	0.000224384	0.0165822
M5175	-5.95799	0.265604	15.9004	6.67636e-05	0.00798585			M11459	-4.9898	1.18304	12.5624	0.000393581	0.020501
M9643	-5.97785	2.39125	16.9145	3.9102e-05	0.00629146			M7412	-4.99496	0.579178	13.7519	0.000208614	0.0162153
M9522	-5.97813	0.314859	14.5236	0.000138413	0.0120495			M5460	-5.00267	4.39674	8.9573	0.00276363	0.0474728
M7377	-5.97982	1.69557	9.64815	0.00189542	0.0436474			M1944	-5.00572	2.93165	14.0779	0.000175396	0.015642
M7407	-5.98455	5.63712	9.57591	0.00197147	0.044669			M9244	-5.01473	3.05035	10.484	0.00120414	0.0330449
M7414	-5.98507	2.58147	9.99233	0.00157193	0.0386477			M11345	-5.01883	2.78985	9.43751	0.00212592	0.0423638
M14487	-5.99113	1.78613	16.7343	4.29969e-05	0.00672549			M12570	-5.02793	0.41968	13.1575	0.000286373	0.0182779
M4816	-5.99351	0.358417	16.5479	4.74363e-05	0.00678556			M18065	-5.02866	2.50543	11.5234	0.000687267	0.0248178
M13907	-5.99992	1.12717	14.7882	0.000120288	0.0110416			M14317	-5.03094	1.95564	15.3039	9.15295e-05	0.0122963
M8517	-6.00124	1.42915	17.4202	2.99618e-05	0.00594191			M9454	-5.03511	1.22165	13.5221	0.000235766	0.0170274
M5481	-6.00296	1.52882	16.1113	5.97262e-05	0.00772879			M10561	-5.04247	1.40444	10.3459	0.00129764	0.0341741
M16695	-6.02769	2.82788	18.485	1.71245e-05	0.00466355			M6691	-5.04301	4.43446	9.7792	0.00176497	0.0391256
M5477	-6.03324	1.21508	15.8874	6.72241e-05	0.00798585			M538	-5.04554	1.46612	13.3346	0.000260552	0.0175526
M4861	-6.05509	1.80274	15.0918	0.000102408	0.0100907			M1467	-5.04678	3.09517	9.75672	0.00178668	0.0391256
M9023	-6.06815	2.5436	10.0167	0.00155128	0.0383781			M12038	-5.04838	-0.23316	11.7425	0.000610894	0.0234942
M2652	-6.09137	1.16792	19.5661	9.71808e-06	0.00409876			M14405	-5.05544	1.57484	14.5944	0.000133307	0.0142911
M3888	-6.09693	2.38134	11.644	0.000644101	0.0233253			M15364	-5.05824	3.00243	12.8539	0.000336769	0.0190314
M13588	-6.11386	1.60953	16.9438	3.85034e-05	0.00627458			M13621	-5.05854	1.97518	15.6862	7.47674e-05	0.0118149
M1978	-6.11736	3.04496	15.9864	6.38008e-05	0.00787351			M16261	-5.06219	1.35448	11.9858	0.00053607	0.0224144
M16987	-6.12362	1.36678	13.2098	0.000278496	0.0156276			M6283	-5.06312	1.21112	10.6374	0.00110823	0.0316555
M8487	-6.14079	1.65671	13.0709	0.000299926	0.0160859			M14427	-5.06407	3.73735	10.331	0.00130816	0.0342141
M16307	-6.14247	3.63544	10.1944	0.00140868	0.0361932			M1915	-5.06431	2.65237	11.9283	0.000552875	0.0226128
M1957	-6.1566	3.2807	13.0027	0.000311049	0.0162039			M8326	-5.06481	2.37649	14.5507	0.000136436	0.0142911
M13828	-6.18446	1.69185	11.0643	0.000880055	0.0279659			M13752	-5.06915	1.33648	12.2678	0.000460834	0.0212301
M5456	-6.23308	1.67964	19.4183	1.04997e-05	0.00409876			M4572	-5.07182	5.34956	8.83032	0.00296267	0.0490984
M10761	-6.24075	0.562832	16.5486	4.7418e-05	0.00678556			M5277	-5.07633	2.22941	14.0575	0.000177301	0.0156505
M7233	-6.2468	0.58753	17.2506	3.27594e-05	0.00594191			M5986	-5.07697	2.59021	13.8381	0.000199254	0.0160757
M12803	-6.24927	1.25292	18.4186	1.77319e-05	0.0046679			M13989	-5.08724	0.531796	14.018	0.000181069	0.0157636
M10534	-6.26543	1.22427	17.8428	2.39922e-05	0.0054458			M4731	-5.08931	2.43618	9.79708	0.0017479	0.0390466
M8712	-6.2779	2.0913	17.6622	2.63813e-05	0.00558888			M9341	-5.09846	1.90364	15.5759	7.92587e-05	0.0120388
M4587	-6.28155	1.65378	10.7495	0.0010431	0.0305503			M17767	-5.11246	2.1183	8.87829	0.00288582	0.0485786
M11443	-6.30203	1.75392	18.4718	1.72439e-05	0.00466355			M6746	-5.12401	2.3721	12.882	0.000331764	0.0190314
M11752	-6.30488	1.44892	12.9209	0.000324932	0.0166254			M14176	-5.12593	2.73384	14.6671	0.000128264	0.0142911
M6359	-6.30928	2.64314	13.7254	0.000211569	0.0139339			M4481	-5.1271	1.12909	12.0343	0.000522306	0.0223687
M11129	-6.31445	2.57871	10.17	0.00142741	0.0365067			M8941	-5.1319	1.0353	14.0246	0.00018043	0.0157636
M11395	-6.32207	2.83531	13.2246	0.000276293	0.0156276			M10278	-5.13214	3.9838	10.8254	0.00100119	0.0301567
M17213	-6.32763	1.84371	11.3947	0.000736557	0.0249663			M14314	-5.13221	3.67519	8.77372	0.00305601	0.0497583
M8428	-6.34228	0.56943	17.1373	3.47732e-05	0.00594191			M9760	-5.13421	0.566027	13.4351	0.000246962	0.0174396
M13608	-6.36441	1.75426	20.0212	7.65899e-06	0.00405639			M4439	-5.15255	1.61271	10.3091	0.00132372	0.0344792
M13457	-6.38031	0.591144	17.5666	2.77417e-05	0.00567775			M2300	-5.15377	1.54974	11.5461	0.000678909	0.0246445
M6284	-6.39409	3.37254	12.6803	0.000369527	0.0177247			M7233	-5.15435	0.58753	13.637	0.000221767	0.0164847
M14281	-6.40198	5.60748	13.9344	0.000189305	0.013149			M2544	-5.15804	-0.154112	11.7257	0.000616428	0.0235542
M6051	-6.42972	2.3533	12.473	0.000412887	0.0187436			M15860	-5.15881	0.651048	12.7796	0.000350417	0.0193659
M8565	-6.43013	0.726706	18.7735	1.47196e-05	0.00445477			M3717	-5.15882	1.54278	9.35583	0.00222277	0.042757
M14321	-6.43292	1.98418	10.5436	0.00116591	0.0327151			M4303	-5.16135	2.76022	10.6031	0.00112901	0.0320039
M11087	-6.44113	1.10656	10.8414	0.000992569	0.0299485			M11202	-5.16525	2.35626	12.8627	0.000335189	0.0190314
M17838	-6.45929	3.34331	14.5602	0.000135751	0.0119002			M3899	-5.16594	1.81633	8.74749	0.00310029	0.0498833
M4841	-6.47212	0.764099	18.1253	2.06838e-05	0.00502125			M13056	-5.16958	0.548611	12.6754	0.000370506	0.0200791
M13255	-6.47478	1.87271	9.83767	0.00170974	0.0408901			M4041	-5.18286	1.37262	8.85471	0.00292333	0.0487643
M10828	-6.48563	0.784177	18.0299	2.17459e-05	0.00502568			M10226	-5.18858	1.66888	14.5789	0.00013441	0.0142911
M14027	-6.49423	0.865075	12.8004	0.000346547	0.0172308			M8081	-5.19418	1.15177	8.96608	0.00275038	0.0474728
M9641	-6.50539	0.873251	17.3655	3.08371e-05	0.00594191			M7269	-5.19581	2.04992	10.5312	0.00117377	0.032725
M940	-6.50838	1.48014	14.3804	0.000149351	0.0120495			M7838	-5.19614	1.10218	13.2509	0.000272448	0.0178181
M2160	-6.53613	4.1944	11.3672	0.00074753	0.0252709			M5717	-5.1986	4.75734	16.337	5.30176e-05	0.0106969
M13767	-6.57074	1.95439	17.1245	3.5007e-05	0.00594191			M3537	-5.20508	0.737707	11.9091	0.000558605	0.0226128
M7365	-6.61024	1.40139	10.1955	0.00140785	0.0361932			M13299	-5.2073	1.62153	10.7559	0.00103946	0.0309428
M13761	-6.61057	0.811309	19.1931	1.1814e-05	0.00414142			M10039	-5.2136	3.43771	9.88274	0.00166836	0.0379404
M10214	-6.63479	0.916535	13.355	0.000257733	0.0154797			M7027	-5.21798	2.65096	9.63893	0.00190496	0.0405595
M5061	-6.64402	1.2514	9.79296	0.00175181	0.041621			M13246	-5.21914	2.08446	8.80672	0.00300124	0.0494154
M8284	-6.67624	1.79118	13.8006	0.000203267	0.0136705			M11965	-5.22282	-0.101588	12.2971	0.000453654	0.0211257
M4803	-6.68067	2.97505	11.6892	0.000628643	0.0232298			M12049	-5.22696	1.62982	11.0312	0.000895898	0.0286044
M3902	-6.68401	0.92811	19.0677	1.26161e-05	0.00414142			M13605	-5.227	4.25384	13.8495	0.000198048	0.0160757
M13599	-6.70782	0.882198	19.4402	1.038e-05	0.00409876			M6195	-5.22771	3.6979	11.9018	0.000560787	0.0226291
M17521	-6.72207	0.98798	19.4007	1.05971e-05	0.00409876			M14785	-5.22904	1.28065	9.35613	0.00222241	0.042757
M17833	-6.74193	1.18668	11.5165	0.000689799	0.0244235			M9541	-5.23008	2.60131	8.99546	0.00270651	0.0472561
M16995	-6.74925	2.24661	17.212	3.34321e-05	0.00594191			M3925	-5.23118	1.38465	11.2651	0.000789792	0.0264882
M14854	-6.75903	1.85039	14.4613	0.000143069	0.0120495			M7876	-5.23696	2.29643	9.28083	0.00231564	0.0434773
M10469	-6.77718	3.24564	15.1267	0.00010053	0.00998314			M12774	-5.23786	-0.0565086	12.2337	0.00046934	0.0214596
M12080	-6.78482	1.73275	19.3357	1.09636e-05	0.00409876			M13318	-5.2381	4.4973	11.4085	0.000731089	0.0253212
M13421	-6.7949	2.36577	15.546	8.05238e-05	0.00905574			M4033	-5.24281	0.651816	13.1402	0.00028903	0.0182779
M9853	-6.79958	1.74606	20.3034	6.6082e-06	0.00405639			M9682	-5.24467	1.59066	15.3108	9.11938e-05	0.0122963
M12895	-6.80113	1.0322	19.5312	9.8968e-06	0.00409876			M10827	-5.24582	-0.032789	9.34778	0.00223256	0.042757
M15905	-6.82349	3.03485	21.2961	3.93529e-06	0.0038478			M987	-5.25774	0.697689	13.7698	0.000206635	0.0162132
M12760	-6.82777	2.1434	11.9806	0.000537587	0.0218315			M13282	-5.25902	1.9258	10.7422	0.00104717	0.0310271
M9700	-6.84988	1.08711	18.9006	1.3771e-05	0.00426933			M11984	-5.26353	2.06512	13.4095	0.000250357	0.0175029
M10010	-6.85269	3.91702	15.0152	0.000106647	0.0104276			M11443	-5.26559	1.75392	14.4896	0.000140938	0.0142911
M7280	-6.89764	-0.837259	14.413	0.000146789	0.0120495			M4696	-5.26572	-0.0485093	11.4461	0.000716423	0.0252256
M12178	-6.91424	-0.806138	13.951	0.000187634	0.013149			M2503	-5.27209	-0.0582861	13.0568	0.000302183	0.0185114
M9577	-6.92623	1.14175	18.0991	2.097e-05	0.00502125			M17134	-5.27981	5.30434	12.0143	0.000527937	0.0223687
M7987	-6.93084	-0.794968	14.1497	0.000168825	0.0126978			M9127	-5.281	4.93294	8.7726	0.0030579	0.0497583
M7326	-6.94716	1.28113	15.3789	8.79648e-05	0.00916492			M13358	-5.28136	0.553312	9.09745	0.00255966	0.0460195
M7402	-7.0025	1.29278	10.3309	0.00130825	0.0348619			M15376	-5.28458	2.57666	12.1588	0.000488572	0.0219094
M15592	-7.00546	-0.531739	15.2659	9.33869e-05	0.00952653			M16966	-5.2851	0.663005	14.1741	0.000166649	0.0154619
M7207	-7.01333	2.31123	21.5273	3.4882e-06	0.0038478			M4680	-5.28956	4.09002	8.83873	0.00294904	0.0490004
M11100	-7.02381	1.25499	16.713	4.34822e-05	0.00672549			M6947	-5.29128	0.127707	9.78974	0.00175488	0.0391141
M11459	-7.07916	1.18304	19.0981	1.24168e-05	0.00414142			M11679	-5.29155	0.200452	9.34397	0.0022372	0.0427625
M4899	-7.08361	-0.675406	14.3177	0.000154407	0.0120606			M6168	-5.29923	1.56459	12.0144	0.000527898	0.0223687
M15831	-7.13552	-0.267387	9.47168	0.00208668	0.0459685			M8934	-5.30425	1.46743	9.76646	0.00177724	0.0391256
M12582	-7.13817	1.24518	20.983	4.63376e-06	0.00392665			M14517	-5.30987	0.509584	14.9192	0.000112217	0.0134565
M13928	-7.22458	-0.529459	14.7254	0.000124359	0.0112108			M11305	-5.31193	2.59181	9.61851	0.00192626	0.0407974
M9676	-7.24524	4.03696	10.5943	0.00113438	0.0322535			M14000	-5.31399	2.06955	11.9716	0.000540175	0.0224973
M17190	-7.26137	1.94086	18.0665	2.13317e-05	0.00502125			M10395	-5.3296	-0.00891374	12.5659	0.000392852	0.020501
M13577	-7.26995	3.46789	9.77314	0.0017708	0.0419202			M12212	-5.33192	1.57451	9.58304	0.00196382	0.0411684
M6130	-7.30096	-0.394407	16.6932	4.39389e-05	0.00672549			M13389	-5.33967	2.83587	14.4863	0.000141181	0.0142911
M11717	-7.33193	1.6209	16.0742	6.09097e-05	0.00772879			M5472	-5.34071	2.33077	12.4538	0.000417141	0.020501
M4648	-7.33451	-0.51095	16.1737	5.77905e-05	0.00765182			M9859	-5.34099	2.92636	9.23721	0.00237146	0.0441001
M10409	-7.40572	-0.445453	17.0437	3.65288e-05	0.00603009			M7889	-5.34154	-0.00307024	12.1291	0.000496411	0.0219094
M7844	-7.41448	0.539908	9.30597	0.00228409	0.048795			M8351	-5.34364	0.44884	13.0862	0.000297486	0.0185114
M3452	-7.42009	-0.377846	15.6613	7.57568e-05	0.00878678			M17773	-5.34442	0.697128	11.998	0.000532567	0.0224144
M4385	-7.46499	-0.374847	17.6216	2.69504e-05	0.00561584			M11174	-5.34748	0.157279	11.014	0.000904268	0.0286044
M14491	-7.47652	-0.425601	16.3774	5.19012e-05	0.00702792			M13608	-5.35109	1.75426	15.883	6.73821e-05	0.0115715
M14426	-7.54223	1.73786	19.9384	7.99779e-06	0.00406639			M490	-5.35262	1.16824	12.5388	0.000398588	0.020501
M15848	-7.5485	-0.23643	14.8307	0.000117602	0.0110123			M9649	-5.35337	2.5136	10.8045	0.00101256	0.0302837
M10585	-7.58373	-0.302845	17.7565	2.51053e-05	0.00550196			M17282	-5.36157	0.0216737	12.3829	0.000433278	0.0207758
M9636	-7.60065	-0.112214	13.2027	0.00027954	0.0156276			M2060	-5.36187	1.172	15.7925	7.06837e-05	0.0116683
M13496	-7.7337	2.63418	20.1304	7.23391e-06	0.00405639			M11316	-5.36604	1.60289	14.3708	0.000150114	0.0146777
M7853	-7.75388	4.55044	15.5257	8.13907e-05	0.00905574			M12080	-5.36715	1.73275	14.4996	0.000140187	0.0142911
M2544	-7.79507	-0.154112	17.5394	2.81408e-05	0.00567775			M11634	-5.37745	2.08859	11.987	0.000535719	0.0224144
M7538	-7.80367	4.09789	13.3518	0.000258178	0.0154797			M4841	-5.3802	0.764099	14.5119	0.000139278	0.0142911
M11217	-7.82097	-0.153905	18.3766	1.81274e-05	0.0046679			M13809	-5.38111	0.148381	13.8033	0.000202979	0.0160757
M11965	-7.86022	-0.101588	18.2202	1.96776e-05	0.00490435			M9643	-5.38208	2.39125	14.6146	0.000131892	0.0142911
M2159	-7.93759	-3.31037e-05	20.2529	6.78493e-06	0.00405639			M5244	-5.38623	2.87843	9.44215	0.00212054	0.0423638
M16581	-7.96584	2.03982	23.917	1.00578e-06	0.0029988			M15027	-5.39245	2.21496	14.8267	0.000117855	0.0140006
M952	-8.00608	0.0332971	18.7116	1.52054e-05	0.00449439			M10555	-5.39483	2.79746	10.3612	0.00128692	0.0340792
M6384	-8.00879	0.667446	12.8697	0.000333938	0.016844			M11438	-5.39497	0.20865	11.6572	0.000639554	0.0239099
M9182	-8.02103	3.07987	13.3572	0.000257434	0.0154797			M6418	-5.39942	0.1146	11.4095	0.000730687	0.0253212
M7241	-8.0684	0.384091	10.7634	0.00103525	0.0304609			M2753	-5.40289	2.05927	11.6578	0.000639336	0.0239099
M8408	-8.13004	0.0962085	19.3643	1.08009e-05	0.00409876			M2728	-5.40765	4.79699	12.3082	0.000450969	0.0211257
M10172	-8.1403	0.204615	19.2249	1.16191e-05	0.00414142			M6478	-5.416	1.00525	12.6718	0.000371221	0.0200791
M971	-8.17403	0.401915	18.6679	1.55577e-05	0.00449439			M5223	-5.42612	2.21965	12	0.000532002	0.0224144
M9388	-8.19761	0.172249	20.1012	7.34509e-06	0.00405639			M10817	-5.43254	2.90726	9.75753	0.0017859	0.0391256
M696	-8.19953	0.143233	19.6849	9.13191e-06	0.00409876			M6364	-5.44605	1.54789	14.6326	0.000130638	0.0142911
M1094	-8.20089	0.222361	21.446	3.63927e-06	0.0038478			M13761	-5.44794	0.811309	15.1233	0.000100712	0.0125342
M10091	-8.23488	1.47663	11.8822	0.000566722	0.0224033			M11267	-5.45139	1.76997	8.75778	0.00308284	0.0497583
M2091	-8.28884	0.394596	21.3149	3.89695e-06	0.0038478			M6682	-5.46993	4.41914	11.6608	0.000638322	0.0239099
M5065	-8.31175	0.253207	20.4945	5.98034e-06	0.00400085			M4584	-5.47319	0.836405	9.57502	0.00197243	0.0411684
M11185	-8.32717	2.40881	20.5891	5.692e-06	0.00400085			M4582	-5.48892	0.108683	13.0591	0.000301813	0.0185114
M6625	-8.48312	0.617547	17.2671	3.24765e-05	0.00594191			M9884	-5.49318	1.31791	11.2208	0.00080887	0.0269857
M15392	-8.49827	0.389756	20.5869	5.69839e-06	0.00400085			M9798	-5.49992	6.87838	14.7858	0.000120442	0.0141754
M6197	-8.51198	0.512855	16.797	4.15985e-05	0.00660948			M11469	-5.50027	0.159872	12.9073	0.000327308	0.0190314
M12570	-8.52919	0.41968	21.5745	3.40339e-06	0.0038478			M8408	-5.50112	0.0962085	13.4374	0.000246653	0.0174396
M11771	-8.53483	0.41813	21.1491	4.24894e-06	0.00385773			M11911	-5.50311	1.01163	13.9798	0.000184784	0.0157636
M11757	-8.58496	0.476558	22.0481	2.659e-06	0.0038478			M10089	-5.51761	4.95668	15.9993	6.33644e-05	0.0115061
M2867	-8.59082	0.471715	19.8483	8.38364e-06	0.00409863			M15356	-5.52702	1.81144	9.5758	0.00197159	0.0411684
M13056	-8.67583	0.548611	20.724	5.30473e-06	0.00400085			M4487	-5.52731	2.79783	11.3557	0.000752171	0.0257012
M10402	-8.8985	0.720205	22.5969	1.99804e-06	0.0038478			M7265	-5.52795	1.71432	17.0096	3.71908e-05	0.0102392
M12393	-8.90402	1.29979	11.0428	0.000890339	0.0282222			M3784	-5.53253	2.63014	13.9847	0.000184308	0.0157636
M9297	-9.19772	0.984874	22.3741	2.24377e-06	0.0038478			M4682	-5.53569	1.06601	11.8854	0.00056577	0.0226497
M8028	-9.2625	1.02773	23.6102	1.17961e-06	0.0029988			M13008	-5.53955	0.230453	11.3477	0.000755429	0.0257433
M14235	-9.26601	1.05421	25.9684	3.47053e-07	0.00220569			M13496	-5.56143	2.63418	13.4496	0.000245056	0.0174396
								M8970	-5.56299	0.885904	17.0317	3.67616e-05	0.0102392
								M13644	-5.56654	0.228517	14.7459	0.000123012	0.0142911
								M5812	-5.57442	1.4478	14.9745	0.000108975	0.0131922
								M7086	-5.58315	2.67429	9.77041	0.00177343	0.0391256
								M6314	-5.60442	0.32576	8.75937	0.00308015	0.0497583
								M9609	-5.60715	3.14011	10.1583	0.00143656	0.0360692
								M5185	-5.62732	1.75433	17.9702	2.24386e-05	0.00853067
								M5175	-5.62836	0.265604	14.1211	0.000171412	0.015642
								M4573	-5.63758	1.08994	15.8915	6.70795e-05	0.0115715
								M8517	-5.64472	1.42915	15.6993	7.42501e-05	0.0118149
								M7034	-5.64581	4.77118	18.5117	1.68865e-05	0.00853067
								M11980	-5.65131	2.35916	13.5527	0.000231961	0.0169452
								M8425	-5.65603	2.35642	13.7124	0.00021304	0.0162153
								M13785	-5.65927	3.88917	13.5324	0.000234484	0.0170274
								M9713	-5.67747	1.27088	12.4368	0.000420956	0.020501
								M10036	-5.68384	3.92146	9.75209	0.00179119	0.0391256
								M8028	-5.70926	1.02773	15.1564	9.89647e-05	0.0125342
								M12895	-5.70964	1.0322	15.9016	6.67238e-05	0.0115715
								M13693	-5.71077	0.279219	14.2946	0.000156316	0.0149973
								M6916	-5.71203	1.52376	16.1971	5.70816e-05	0.0108293
								M12317	-5.71262	3.6912	10.3947	0.00126376	0.0338182
								M9495	-5.72245	2.87285	12.3889	0.000431887	0.0207758
								M17790	-5.72732	1.19081	13.919	0.000190856	0.0158112
								M16315	-5.7314	0.297429	14.0717	0.000175974	0.015642
								M7745	-5.73573	2.12848	12.0245	0.000525061	0.0223687
								M6235	-5.73665	3.83592	12.4417	0.000419847	0.020501
								M8737	-5.75507	1.81197	15.1338	0.000100155	0.0125342
								M10631	-5.78075	3.26035	9.50907	0.00204459	0.0419675
								M13382	-5.79004	4.91198	12.4843	0.00041039	0.020501
								M2650	-5.80263	2.5006	14.0791	0.000175281	0.015642
								M10027	-5.80306	2.83864	10.1622	0.00143353	0.0360692
								M14514	-5.80769	1.10612	11.9659	0.000541826	0.0224973
								M11292	-5.81447	1.28458	14.2873	0.000156922	0.0149973
								M1013	-5.81657	2.69247	11.7397	0.000611801	0.0234942
								M7580	-5.82568	1.13545	11.4109	0.000730154	0.0253212
								M11642	-5.8389	3.64798	12.5311	0.00040023	0.020501
								M3513	-5.84387	2.62993	16.1252	5.92902e-05	0.0110829
								M16454	-5.84535	3.47663	10.3872	0.00126893	0.0338852
								M9776	-5.84983	2.72944	13.3769	0.000254743	0.0175029
								M15392	-5.86145	0.389756	14.6525	0.000129263	0.0142911
								M9644	-5.86277	0.419029	15.3189	9.08037e-05	0.0122963
								M11919	-5.86374	2.2533	13.6487	0.000220397	0.0164792
								M7058	-5.8649	2.07672	9.81349	0.00173237	0.0388362
								M6373	-5.87151	2.37184	10.7181	0.00106095	0.031172
								M9578	-5.8727	2.34321	13.933	0.000189446	0.0158112
								M7619	-5.87308	0.473328	14.187	0.000165511	0.0154619
								M8034	-5.88281	0.664758	9.47582	0.00208198	0.0420823
								M10449	-5.88465	2.14192	10.0061	0.00156024	0.0369315
								M7567	-5.88854	3.05866	11.0744	0.00087527	0.0283093
								M355	-5.89161	2.52678	14.444	0.000144391	0.0143387
								M12503	-5.89301	4.05772	14.5636	0.000135509	0.0142911
								M11985	-5.90358	1.76178	11.4958	0.000697538	0.0250444
								M11771	-5.90613	0.41813	15.1673	9.83924e-05	0.0125342
								M10320	-5.90709	0.444204	13.9548	0.000187259	0.0158112
								M9577	-5.911	1.14175	15.1073	0.000101567	0.0125342
								M9640	-5.91568	3.92282	12.5058	0.000405687	0.020501
								M9411	-5.92621	0.520696	16.8074	4.13714e-05	0.0102406
								M4417	-5.92876	2.24418	9.51755	0.00203516	0.0419447
								M7808	-5.93068	0.707886	15.3881	8.75389e-05	0.0122963
								M6863	-5.95768	1.24221	17.0084	3.72146e-05	0.0102392
								M4109	-5.95922	1.71353	11.5417	0.000680531	0.0246445
								M6412	-5.96734	3.534	18.2387	1.94877e-05	0.00853067
								M11562	-5.96824	0.885494	12.89	0.00033035	0.0190314
								M14552	-5.96931	3.49022	15.2564	9.38567e-05	0.0124272
								M1877	-5.97369	0.710186	16.8341	4.07944e-05	0.0102406
								M12803	-5.97496	1.25292	17.0051	3.72789e-05	0.0102392
								M6152	-5.98109	0.657321	11.7182	0.00061892	0.0235542
								M16656	-5.98685	1.77139	16.525	4.80116e-05	0.0105319
								M10525	-5.99843	2.76375	11.9184	0.000555829	0.0226128
								M8141	-6.01175	3.5947	9.32606	0.00225918	0.0428603
								M9172	-6.02016	3.17078	12.2729	0.000459578	0.0212301
								M17010	-6.02237	0.555519	16.0621	6.12974e-05	0.011292
								M13876	-6.04128	0.613549	15.833	6.91866e-05	0.0115715
								M12493	-6.05187	1.83355	16.7484	4.26775e-05	0.0102406
								M9892	-6.05409	3.77345	9.93712	0.00161979	0.037709
								M10289	-6.06448	2.58584	10.2927	0.00133559	0.0346463
								M8428	-6.07272	0.56943	15.673	7.52898e-05	0.0118149
								M856	-6.09292	1.36613	16.5408	4.76154e-05	0.0105319
								M8021	-6.09937	1.31918	15.9161	6.62128e-05	0.0115715
								M8287	-6.11685	2.5386	10.2097	0.00139702	0.0356575
								M12264	-6.15552	0.645102	14.5709	0.000134986	0.0142911
								M7993	-6.16688	2.79937	15.2962	9.19002e-05	0.0122963
								M4429	-6.17567	2.29288	8.93109	0.00280358	0.047995
								M11207	-6.17812	1.40111	15.8536	6.84379e-05	0.0115715
								M9262	-6.18679	3.2665	10.3982	0.00126139	0.0338182
								M16628	-6.18747	1.50451	16.768	4.22402e-05	0.0102406
								M10435	-6.19589	2.06186	15.415	8.62993e-05	0.0122963
								M10402	-6.19873	0.720205	16.2624	5.51461e-05	0.0107246
								M8098	-6.20411	2.07935	10.0728	0.00150478	0.0369246
								M14566	-6.22775	1.44455	11.825	0.000584392	0.022948
								M14095	-6.22902	2.84494	17.8034	2.44949e-05	0.00864875
								M12468	-6.2481	1.66507	15.4478	8.48149e-05	0.0122963
								M14273	-6.25155	1.55866	10.2746	0.00134877	0.0348459
								M2201	-6.26765	3.16895	11.3339	0.000761041	0.0258652
								M12405	-6.28071	0.805036	18.1183	2.07599e-05	0.00853067
								M13213	-6.28155	1.24731	9.84381	0.00170404	0.0384726
								M7846	-6.312	4.83487	13.9121	0.000191561	0.0158112
								M5264	-6.32293	1.56041	18.6077	1.60572e-05	0.00853067
								M8356	-6.3386	3.20423	13.1094	0.000293818	0.0183976
								M5362	-6.34206	1.63217	18.048	2.15407e-05	0.00853067
								M5327	-6.37085	1.46493	9.43935	0.00212379	0.0423638
								M5155	-6.38296	2.26457	10.0944	0.00148719	0.036635
								M14369	-6.40998	0.914582	13.4602	0.000243675	0.0174396
								M4906	-6.41631	4.3638	18.4886	1.70921e-05	0.00853067
								M10053	-6.42811	1.77003	9.28921	0.00230508	0.0434715
								M11159	-6.48965	2.56199	17.7308	2.54479e-05	0.00874237
								M9464	-6.49934	1.00065	16.4006	5.12696e-05	0.0106969
								M6508	-6.50582	1.77654	19.5122	9.99583e-06	0.00853067
								M15905	-6.53057	3.03485	19.9374	8.00203e-06	0.00853067
								M5456	-6.53811	1.67964	19.9596	7.90947e-06	0.00853067
								M14487	-6.5433	1.78613	17.9114	2.3143e-05	0.00853067
								M12928	-6.55932	3.55674	13.7974	0.000203618	0.0160757
								M12624	-6.56562	1.16786	9.20078	0.00241912	0.0446909
								M8732	-6.59001	1.84669	15.6284	7.70866e-05	0.0119494
								M14814	-6.61134	3.32255	11.6361	0.000646828	0.0240405
								M15672	-6.63204	3.11172	16.6684	4.45153e-05	0.0103103
								M5467	-6.65143	3.52021	12.3814	0.000433638	0.0207758
								M11913	-6.6609	2.21386	9.04088	0.00264008	0.046685
								M13797	-6.69956	2.78327	8.96863	0.00274655	0.0474728
								M11293	-6.7128	1.27958	17.119	3.51086e-05	0.0102392
								M5193	-6.74759	-0.440373	8.87332	0.00289368	0.0485786
								M9746	-6.75215	1.881	13.1136	0.000293161	0.0183976
								M13429	-6.77281	2.14685	12.3533	0.000440216	0.0209573
								M6072	-6.81694	-0.886254	12.8509	0.000337317	0.0190314
								M12152	-6.84774	2.34267	12.6204	0.000381564	0.0202931
								M13767	-6.87413	1.95439	17.6586	2.64324e-05	0.00884164
								M11377	-6.93904	2.05309	14.4066	0.000147283	0.0145125
								M9507	-6.93925	1.42188	14.5719	0.000134913	0.0142911
								M17657	-6.96455	2.54789	12.3765	0.000434771	0.0207758
								M8082	-7.03656	-0.639592	12.3019	0.000452509	0.0211257
								M10728	-7.09464	-0.232561	11.2777	0.000784431	0.0264882
								M18104	-7.10936	0.308813	8.99956	0.00270044	0.047215
								M10468	-7.12636	0.545713	11.3607	0.000750164	0.0257012
								M10301	-7.18658	-0.633185	13.65	0.000220246	0.0164792
								M15897	-7.19863	2.31154	20.6512	5.51019e-06	0.00853067
								M12039	-7.22934	-0.40354	12.5353	0.00039934	0.020501
								M13884	-7.23425	1.62061	18.7208	1.51326e-05	0.00853067
								M8067	-7.24237	-0.310104	11.0049	0.00090872	0.0286044
								M9295	-7.28259	2.35675	18.0909	2.10609e-05	0.00853067
								M8844	-7.30841	-0.474914	14.4705	0.00014237	0.0142911
								M12675	-7.33785	-0.51885	14.3447	0.000152209	0.0147689
								M12904	-7.3405	-0.186055	10.061	0.00151437	0.0369315
								M4082	-7.34062	-0.268009	11.8558	0.000574827	0.0227621
								M15836	-7.34363	1.71399	15.3734	8.8223e-05	0.0122963
								M9256	-7.36399	-0.439597	15.1365	0.000100009	0.0125342
								M11612	-7.41003	-0.309694	11.099	0.000863743	0.0280794
								M14303	-7.47025	0.761362	9.94394	0.00161379	0.0377076
								M6292	-7.47565	1.85084	21.5918	3.37292e-06	0.00853067
								M14491	-7.47652	-0.425601	15.0632	0.00010397	0.0127073
								M9696	-7.5241	0.674995	8.91978	0.00282099	0.0480604
								M2644	-7.67549	0.0262392	10.1413	0.00144982	0.0360692
								M13724	-7.70691	2.01035	22.0362	2.6755e-06	0.00850206
								M14340	-7.77687	-0.143242	16.6643	4.46123e-05	0.0103103
								M11217	-7.82097	-0.153905	16.9758	3.78603e-05	0.0102392
								M13576	-7.83042	2.45213	16.5233	4.80567e-05	0.0105319
								M10656	-7.87271	-0.0427636	13.268	0.000269975	0.0178093
								M13541	-7.90531	2.2377	12.9125	0.000326393	0.0190314
								M13348	-7.9059	0.0709287	17.4368	2.97016e-05	0.00968043
								M13380	-8.01135	0.0221865	18.2664	1.92064e-05	0.00853067
								M12275	-8.10366	0.0828804	18.099	2.09711e-05	0.00853067
								M11239	-8.15115	1.56958	9.95831	0.00160125	0.0375526
								M2828	-8.16209	0.163207	17.8831	2.34894e-05	0.00853067
								M15843	-8.16526	0.211503	17.8887	2.34206e-05	0.00853067
								M696	-8.19953	0.143233	18.2953	1.89178e-05	0.00853067
								M11827	-8.20778	0.16948	18.8879	1.38626e-05	0.00853067
								M8406	-8.31055	0.243237	19.1024	1.2389e-05	0.00853067
								M7463	-8.32099	0.980633	9.51677	0.00203602	0.0419447
								M7455	-8.36866	0.619838	15.5688	7.95576e-05	0.0120388
								M8598	-8.47792	0.375979	16.3773	5.19027e-05	0.0106969
								M11678	-8.53108	0.531177	14.5771	0.000134536	0.0142911
								M4493	-8.54097	2.72624	18.3269	1.86059e-05	0.00853067
								M6061	-8.59218	0.940534	12.7149	0.000362758	0.0197897
								M10207	-8.6671	0.545478	18.7731	1.47232e-05	0.00853067
								M4990	-8.69076	0.720384	18.7037	1.52687e-05	0.00853067
								M13841	-8.69851	2.00385	10.8384	0.000994173	0.0300165
								M6198	-8.70534	1.09711	19.8413	8.41428e-06	0.00853067
								M8839	-8.70647	2.23771	10.8773	0.000973516	0.0297461
								M13457	-8.7481	0.591144	20.7075	5.35049e-06	0.00853067
								M13497	-8.78294	0.654814	21.1548	4.2364e-06	0.00853067
								M4249	-8.89326	1.06841	16.7475	4.26996e-05	0.0102406
								M6247	-8.97897	1.05543	16.2518	5.5456e-05	0.0107246
								M13347	-9.35621	1.14318	18.7656	1.47812e-05	0.00853067
								M8088	-9.4406	2.73503	13.7365	0.000210324	0.0162153
								M17783	-9.47079	1.31692	16.8095	4.13253e-05	0.0102406
								M8367	-9.4923	1.72003	11.2534	0.000794759	0.0265847
								M5833	-9.49599	1.39628	16.244	5.5686e-05	0.0107246
								M12488	-9.56072	1.89961	12.507	0.000405438	0.020501

## Sheet: Fig3B
MOI 10						MOI 100						Summary
sgRNA	logFC	Sequence	Length	Type		sgRNA	logFC	Sequence	Length	Type			MS2	SNP	Control
M45	3.20826	CCCGGGTCCTCTCTTTAGGG	20	MS2 targeting		M45	3.52609	CCCGGGTCCTCTCTTTAGGG	20	MS2 targeting		MOI10	90	38	3
M48	3.8839	GGGTCCTCTCTTTAGGGGGA	20	MS2 targeting		M292	2.16925	AGTATGGAACCACGCTATGT	20	MS2 targeting		MOI100	107	54	5
M292	2.45486	AGTATGGAACCACGCTATGT	20	MS2 targeting		M601	3.5025	GGCGAAGAGATTGTCAACAG	20	MS2 targeting
M519	3.94807	GTACCCACACCTTATAGAGG	20	MS2 targeting		M602	3.44973	GCGAAGAGATTGTCAACAGG	20	MS2 targeting
M556	2.30753	TCCGACAACTCCCCAACCCC	20	MS2 targeting		M612	3.24925	TGTCAACAGGTTTCTTGATG	20	MS2 targeting
M611	3.33901	TTGTCAACAGGTTTCTTGAT	20	MS2 targeting		M792	2.99746	CGTAGATGCCTATGGTTCCG	20	MS2 targeting
M616	4.91886	AACAGGTTTCTTGATGTAAA	20	MS2 targeting		M896	2.99788	GTGGAAAATAGTTCCCATCG	20	MS2 targeting
M719	4.39487	GGTTTAAAACCGTAGTAGGC	20	MS2 targeting		M905	2.96603	AGTTCCCATCGTATCGTCTC	20	MS2 targeting
M806	2.59418	GTTCCGGCGTTACCAAAATG	20	MS2 targeting		M1101	5.01715	CATTCAGGTCTATACCAACG	20	MS2 targeting
M907	2.48072	TTCCCATCGTATCGTCTCGC	20	MS2 targeting		M1121	3.95339	GATTTGAGCCGGCGTCTGAT	20	MS2 targeting
M957	5.61537	GATCGAGATATGAATATAGC	20	MS2 targeting		M1152	4.19507	CCCCTTTCTGGAGGTACATA	20	MS2 targeting
M1161	2.41533	GGAGGTACATATTCATATCA	20	MS2 targeting		M1153	4.33117	CCCTTTCTGGAGGTACATAT	20	MS2 targeting
M1196	3.5018	GCCCGATCTATTTTATTATT	20	MS2 targeting		M1161	2.24528	GGAGGTACATATTCATATCA	20	MS2 targeting
M1198	3.31635	CCGATCTATTTTATTATTCT	20	MS2 targeting		M1195	3.59677	AGCCCGATCTATTTTATTAT	20	MS2 targeting
M1204	5.29002	TATTTTATTATTCTTCGGAA	20	MS2 targeting		M1196	2.66891	GCCCGATCTATTTTATTATT	20	MS2 targeting
M1206	3.00955	TTTTATTATTCTTCGGAACT	20	MS2 targeting		M1198	2.93284	CCGATCTATTTTATTATTCT	20	MS2 targeting
M1207	3.71762	TTTATTATTCTTCGGAACTG	20	MS2 targeting		M1258	4.25072	TTCATATGACTCGTTATAGC	20	MS2 targeting
M1220	3.61521	GGAACTGTAAACACTCCGTT	20	MS2 targeting		M1365	3.5116	CGAACTTCTTGTAAGGCGCT	20	MS2 targeting
M1259	2.97292	TCATATGACTCGTTATAGCG	20	MS2 targeting		M1394	4.125	AACTTGTGCCCCATAGGAGC	20	MS2 targeting
M1541	3.37471	CCTTCTCTATTTATCTGACC	20	MS2 targeting		M1449	4.52428	ATCGGTAGCCAGAGAGGAGG	20	MS2 targeting
M1634	3.44142	AAGGTCGGATGCTTTGTGAG	20	MS2 targeting		M1541	3.49023	CCTTCTCTATTTATCTGACC	20	MS2 targeting
M1748	2.01036	AGAGAAAGATCGCGAGGAAG	20	MS2 targeting		M1612	2.97188	CGCCTCGTCATTACCAGAAC	20	MS2 targeting
M1754	4.51759	AGATCGCGAGGAAGATCAAT	20	MS2 targeting		M1613	3.67004	GCCTCGTCATTACCAGAACC	20	MS2 targeting
M1756	4.22011	ATCGCGAGGAAGATCAATAC	20	MS2 targeting		M1617	3.22522	CGTCATTACCAGAACCTAAG	20	MS2 targeting
M1788	5.84833	ACTTCTTTGTTGTCTTCGAC	20	MS2 targeting		M1732	3.04987	TGATTGGTAAATTTCGAGAG	20	MS2 targeting
M1812	3.03308	GTAATCCTCATGTTTGAATG	20	MS2 targeting		M1748	2.50105	AGAGAAAGATCGCGAGGAAG	20	MS2 targeting
M1894	3.5196	TTTTAGGAGACCTTGCATTG	20	MS2 targeting		M1760	3.20379	CGAGGAAGATCAATACATAA	20	MS2 targeting
M1941	2.65207	TCGTAGCGAAAATTGGAATG	20	MS2 targeting		M1761	2.88558	GAGGAAGATCAATACATAAA	20	MS2 targeting
M2053	2.77588	GATGGTGTATTTGCGATTCT	20	MS2 targeting		M1783	4.77904	GTTGAACTTCTTTGTTGTCT	20	MS2 targeting
M2126	2.62136	TTAGAGCTGATCCATTCAGC	20	MS2 targeting		M1786	3.35821	GAACTTCTTTGTTGTCTTCG	20	MS2 targeting
M2572	3.164	TTTTCCCACACTATACCTAG	20	MS2 targeting		M1876	4.92184	GGGAATCGGGTTTCCATCTT	20	MS2 targeting
M2745	2.55364	ACGTACGGCTCTCATAGGAA	20	MS2 targeting		M1962	3.07509	TTAGTTCCATATTTAAGTAC	20	MS2 targeting
M3096	2.65322	TTCGATGTAAGTCAAGTTTT	20	MS2 targeting		M2057	3.1249	GTGTATTTGCGATTCTGCGC	20	MS2 targeting
M3124	3.4741	GGGAAGAGGCTGTAGCAGGA	20	MS2 targeting		M2126	2.49657	TTAGAGCTGATCCATTCAGC	20	MS2 targeting
M3210	3.89717	TCGCTTGTAGGCACCTTGAT	20	MS2 targeting		M2287	2.30376	GCTAACGCATCTAAGGTATG	20	MS2 targeting
M3268	3.04023	GAGGGGTAGTGCCACTGTTT	20	MS2 targeting		M2376	3.44185	GGCTGAGATTTGGGCCTTAG	20	MS2 targeting
M3293	2.9457	TGGCCCCAGTCGAGTTAAAA	20	MS2 targeting		M2575	2.87622	TCCCACACTATACCTAGTGG	20	MS2 targeting
M3404	3.40548	TCTCGTTCTCCCTATCAAGG	20	MS2 targeting		M2592	4.06752	TGGGTTCAAGATACCTAGAG	20	MS2 targeting
M3406	4.29482	TCGTTCTCCCTATCAAGGGT	20	MS2 targeting		M2673	2.54156	GTTGCACGTTGTCTGGAAGT	20	MS2 targeting
M3415	5.59438	CTATCAAGGGTACTAAAAGC	20	MS2 targeting		M2745	2.18514	ACGTACGGCTCTCATAGGAA	20	MS2 targeting
M3501	3.4142	CGCTAAAGACATTAAAAATG	20	MS2 targeting		M2785	3.69513	TTCGTAAGCATCTCATATGC	20	MS2 targeting
M3611	2.61512	GGGGGAGGTCCCTGGGCCGAA	21	MS2 targeting		M3003	3.20187	GGCCTCTGCTAAAGCAACAC	20	MS2 targeting
M3615	2.25241	GAGGTCCCTGGGCCGAAGCCC	21	MS2 targeting		M3096	4.24756	TTCGATGTAAGTCAAGTTTT	20	MS2 targeting
M4250	4.48402	AACGTTTTACGAAGATTCGGT	21	MS2 targeting		M3202	5.57099	GACCCACTTCGCTTGTAGGC	20	MS2 targeting
M4327	4.64713	TATAATATCGTCCCCGTAGAT	21	MS2 targeting		M3207	4.61525	ACTTCGCTTGTAGGCACCTT	20	MS2 targeting
M4726	4.05566	ATCAGGCTCCTTACAGGCAGC	21	MS2 targeting		M3210	5.04487	TCGCTTGTAGGCACCTTGAT	20	MS2 targeting
M4744	5.24731	AGCCCGATCTATTTTATTATT	21	MS2 targeting		M3220	4.93271	GCACCTTGATCTATCGATGT	20	MS2 targeting
M5116	4.16554	ACCATTCGCCTCCCGTAGCTT	21	MS2 targeting		M3329	3.42825	TCGAACGATATTTTAAAGAG	20	MS2 targeting
M5341	4.25502	CTTTGTTGTCTTCGACATGGG	21	MS2 targeting		M3366	3.40439	CTCACCGTCCGCGTAAACGC	20	MS2 targeting
M5431	4.62434	CGGGTTTCCATCTTTTAGGAG	21	MS2 targeting		M3404	2.92493	TCTCGTTCTCCCTATCAAGG	20	MS2 targeting
M5519	4.41011	ATATTTAAGTACGAACGCCAT	21	MS2 targeting		M3413	3.44904	CCCTATCAAGGGTACTAAAA	20	MS2 targeting
M5675	3.0777	TTAGAGCTGATCCATTCAGCG	21	MS2 targeting		M3419	3.51447	CAAGGGTACTAAAAGCTCGC	20	MS2 targeting
M5999	5.51531	ACTCACCCGTTATTACGTCAG	21	MS2 targeting		M3421	4.8591	AGGGTACTAAAAGCTCGCAC	20	MS2 targeting
M6097	3.50703	TCGACAACGAATGAGAAAGGC	21	MS2 targeting		M3501	2.75844	CGCTAAAGACATTAAAAATG	20	MS2 targeting
M6831	6.36118	CTGTTTCGTTTTGGCCCCAGT	21	MS2 targeting		M3523	3.89553	ATTAGCTCGACAGGAAGTTG	20	MS2 targeting
M6874	3.62314	CAGTTCGAACGATATTTTAAA	21	MS2 targeting		M3615	2.19452	GAGGTCCCTGGGCCGAAGCCC	21	MS2 targeting
M6885	5.20831	ATATTTTAAAGAGAATGAGTT	21	MS2 targeting		M4337	4.92892	TCCCCGTAGATGCCTATGGTT	21	MS2 targeting
M7176	4.53655	CGAAGCCCGCCCACCTTTCGGT	22	MS2 targeting		M4442	4.57949	ATTGTGGAAAATAGTTCCCAT	21	MS2 targeting
M7714	4.72495	ACAGGTTTCTTGATGTAAAACG	22	MS2 targeting		M4532	3.66518	GGGAGAAAACTCCACACCAGG	21	MS2 targeting
M7977	4.02181	GAACCCATTTCCCATTGTGGAA	22	MS2 targeting		M4735	3.27509	CTTACAGGCAGCCCGATCTAT	21	MS2 targeting
M7990	3.28012	ATTGTGGAAAATAGTTCCCATC	22	MS2 targeting		M4746	4.45305	CCCGATCTATTTTATTATTCT	21	MS2 targeting
M8197	4.50179	TCATTCAGGTCTATACCAACGG	22	MS2 targeting		M4785	4.35369	CGTTCCCTACAACGAGCCTAA	21	MS2 targeting
M8267	3.36399	TATTCATATCAGGCTCCTTACA	22	MS2 targeting		M4786	6.38885	GTTCCCTACAACGAGCCTAAA	21	MS2 targeting
M8268	4.49237	ATTCATATCAGGCTCCTTACAG	22	MS2 targeting		M4903	3.8851	TGCTTGTTCAGCGAACTTCTT	21	MS2 targeting
M8579	5.14519	TACGGATGCTGGTTTGTAAAAC	22	MS2 targeting		M5121	5.31599	TCGCCTCCCGTAGCTTAGCGA	21	MS2 targeting
M8750	4.92871	GCAATTCGTCCCTTAAGTAAGC	22	MS2 targeting		M5202	5.1161	GCAATTCGTCCCTTAAGTAAG	21	MS2 targeting
M8832	5.5422	TTGGTAAATTTCGAGAGAAAGA	22	MS2 targeting		M5207	2.78787	TCGTCCCTTAAGTAAGCAATT	21	MS2 targeting
M8836	3.78752	TAAATTTCGAGAGAAAGATCGC	22	MS2 targeting		M5296	3.96923	GAGAGAAAGATCGCGAGGAAG	21	MS2 targeting
M8878	6.27192	GAGTTGAACTTCTTTGTTGTCT	22	MS2 targeting		M5363	2.647	AATCCTCATGTTTGAATGGCC	21	MS2 targeting
M9546	2.8561	GACTCACCCGTTATTACGTCAG	22	MS2 targeting		M5372	3.72555	GTTTGAATGGCCGGCGTCTAT	21	MS2 targeting
M9663	5.39037	GGCACCTTTTCCCACACTATAC	22	MS2 targeting		M5715	6.38057	TTGGGGCGACAGTCACGTCGC	21	MS2 targeting
M9880	6.89476	CCTTCGTAAGCATCTCATATGC	22	MS2 targeting		M5785	3.98701	GCTTCAAACTCCGGTTGAGGG	21	MS2 targeting
M10305	4.50855	CTTCGCTTGTAGGCACCTTGAT	22	MS2 targeting		M5800	4.44712	TGAGGGCTCTATCTAGAGAGC	21	MS2 targeting
M10327	6.7652	CTATCGATGTGACACTTAACGC	22	MS2 targeting		M6186	5.72339	GTTTATGTAAAACCATATCAC	21	MS2 targeting
M10509	4.64876	TCCCTATCAAGGGTACTAAAAG	22	MS2 targeting		M6492	3.67757	GGCAGTGTACGCCTTCACGAG	21	MS2 targeting
M10658	6.14822	GCCAAGCAGCTAGTTACCAAATC	23	MS2 targeting		M6763	3.54471	TTGTAGGCACCTTGATCTATC	21	MS2 targeting
M11033	4.66926	GTATCCGCGAGCAGCCGCCCGTA	23	MS2 targeting		M6878	5.51226	TCGAACGATATTTTAAAGAGA	21	MS2 targeting
M11543	4.23781	GAAAATAGTTCCCATCGTATCGT	23	MS2 targeting		M6954	3.81804	CTCGTTCTCCCTATCAAGGGT	21	MS2 targeting
M11845	5.71124	ATCTATTTTATTATTCTTCGGAA	23	MS2 targeting		M7010	2.4187	GGAATTCCGGCTACCTACAGC	21	MS2 targeting
M12541	5.27417	TAGGAGACCTTGCATTGCCTTAA	23	MS2 targeting		M7063	2.56006	AAAAATGGCATTAGCTCGACA	21	MS2 targeting
M12997	4.40402	ACGGATTGTACCCCTCGATGCAT	23	MS2 targeting		M7136	5.87373	GAGAATCCCGGGTCCTCTCTTT	22	MS2 targeting
M13236	4.54975	TGGGTTCAAGATACCTAGAGACG	23	MS2 targeting		M7242	4.68631	CCCCGTTTACGGGGGTCCCTCG	22	MS2 targeting
M13851	3.77433	ACTTCGCTTGTAGGCACCTTGAT	23	MS2 targeting		M7682	5.78634	TTAATATCAGCATCAGGGCGAA	22	MS2 targeting
M14044	5.26913	AAGGTCTCGTTCTCCCTATCAAG	23	MS2 targeting		M7701	2.72906	GAAGAGATTGTCAACAGGTTTC	22	MS2 targeting
M14210	3.0839	TACGGACCGGTCTCAGGGAATT	22	Control		M7723	5.11298	TTGATGTAAAACGGTTTGACAT	22	MS2 targeting
M14238	5.12078	TATACCGCTTTCAGTTTTCATTT	23	Control		M7818	3.10076	TTTAAAACCGTAGTAGGCAAGT	22	MS2 targeting
M14734	3.92913	GTCAAGGCTTCTTATTATTTTAT	23	Control		M7990	4.45112	ATTGTGGAAAATAGTTCCCATC	22	MS2 targeting
M14945	2.50199	GAGGTCCCTGGGCCGGAGCCCGC	23	SNP		M8254	4.59312	TTCTGGAGGTACATATTCATAT	22	MS2 targeting
M14950	2.52227	GAGGTCCCTGGGCCGAAACCCGC	23	SNP		M8268	4.44634	ATTCATATCAGGCTCCTTACAG	22	MS2 targeting
M14956	2.34245	GAGGTCCCTGGGCCGAAGCACGC	23	SNP		M8295	5.84663	CCGATCTATTTTATTATTCTTC	22	MS2 targeting
M15119	2.75649	TTAGAGGTGATCCATTCAGCG	21	SNP		M8457	3.80702	TTCAGCGAACTTCTTGTAAGGC	22	MS2 targeting
M15120	3.22749	TTAGAGTTGATCCATTCAGCG	21	SNP		M8824	3.82841	GCAATTGATTGGTAAATTTCGA	22	MS2 targeting
M15121	3.35235	TTAGAGCAGATCCATTCAGCG	21	SNP		M8835	5.00503	GTAAATTTCGAGAGAAAGATCG	22	MS2 targeting
M15122	3.89443	TTAGAGCCGATCCATTCAGCG	21	SNP		M8978	4.57106	TCGGGTTTCCATCTTTTAGGAG	22	MS2 targeting
M15126	2.99008	TTAGAGCTTATCCATTCAGCG	21	SNP		M9485	2.67256	GGCCTTAGCAGTGCCCTGTCTC	22	MS2 targeting
M15152	2.97586	TTAGAGCTGATCCATTCGGCG	21	SNP		M9787	4.53253	AGTTTGCAGCTGGATACGACAG	22	MS2 targeting
M15172	3.83596	AGTCTGGAACCACGCTATGT	20	SNP		M9989	2.54821	TTCGTTTAGGGCAAGGTAGCGG	22	MS2 targeting
M15183	3.37012	AGTATGTAACCACGCTATGT	20	SNP		M10305	3.81337	CTTCGCTTGTAGGCACCTTGAT	22	MS2 targeting
M15196	3.06025	AGTATGGAACCCCGCTATGT	20	SNP		M10431	5.14124	CGATATTTTAAAGAGAATGAGT	22	MS2 targeting
M15199	2.97702	AGTATGGAACCAAGCTATGT	20	SNP		M10471	3.8183	CCGCGTAAACGCGAACGGAGGG	22	MS2 targeting
M15219	3.46476	AGTATGGAACCACGCTATTT	20	SNP		M10687	7.04854	ATCCCGGGTCCTCTCTTTAGGGG	23	MS2 targeting
M15279	4.44219	ACGGATGCTGGTTTGTAATACA	22	SNP		M11770	3.73477	GAGCCGGCGTCTGATGAAAGCAC	23	MS2 targeting
M15303	2.74526	GCTATCGCATCTAAGGTATGG	21	SNP		M11888	7.03224	ACAACGAGCCTAAATTCATATGA	23	MS2 targeting
M15315	3.13084	GCTAACGCTTCTAAGGTATGG	21	SNP		M12466	4.66889	TGTTTGAATGGCCGGCGTCTATT	23	MS2 targeting
M16039	4.1857	GCATCTAAGGTATAGACCATCGA	23	SNP		M12585	5.54128	TCGTAGCGAAAATTGGAATGGTT	23	MS2 targeting
M16428	3.9682	CGGATTGTACCCCTTGATGC	20	SNP		M12588	3.74783	TAGCGAAAATTGGAATGGTTAGT	23	MS2 targeting
M16474	4.00085	GTCGGTGATTACACCTCCAGTAT	23	SNP		M13851	3.30603	ACTTCGCTTGTAGGCACCTTGAT	23	MS2 targeting
M17304	3.31066	AGAGTAAGATCGCGAGGAAG	20	SNP		M14210	3.42936	TACGGACCGGTCTCAGGGAATT	22	Control
M17311	3.25519	AGAGAAAAATCGCGAGGAAG	20	SNP		M14238	5.2338	TATACCGCTTTCAGTTTTCATTT	23	Control
M17313	2.88451	AGAGAAATATCGCGAGGAAG	20	SNP		M14281	5.53574	GTACGACATATACGCAGGGTGA	22	Control
M17316	3.07682	AGAGAAAGTTCGCGAGGAAG	20	SNP		M14483	5.98331	TTGCGGAATACCTTATCAAC	20	Control
M17317	2.2745	AGAGAAAGAACGCGAGGAAG	20	SNP		M14551	3.95562	GCGGGACTACGACTATAATTTAG	23	Control
M17319	2.68385	AGAGAAAGAGCGCGAGGAAG	20	SNP		M14966	4.55313	GAGGTCCCTGGGCCGAAGCCCGG	23	SNP
M17320	2.6442	AGAGAAAGATAGCGAGGAAG	20	SNP		M14991	3.81338	CTCATAGTAAGAAACTCTTGAA	22	SNP
M17322	2.57005	AGAGAAAGATTGCGAGGAAG	20	SNP		M15120	3.66778	TTAGAGTTGATCCATTCAGCG	21	SNP
M17328	3.6881	AGAGAAAGATCGTGAGGAAG	20	SNP		M15124	3.62197	TTAGAGCTAATCCATTCAGCG	21	SNP
M17330	2.46506	AGAGAAAGATCGCCAGGAAG	20	SNP		M15139	3.99865	TTAGAGCTGATCCCTTCAGCG	21	SNP
M17588	2.82558	GGAGGGGACGAAGGCCTCGTTCT	23	SNP		M15148	3.62998	TTAGAGCTGATCCATTAAGCG	21	SNP
M17703	2.4843	GAAGAGATTTTCAACAGGTT	20	SNP		M15152	3.41974	TTAGAGCTGATCCATTCGGCG	21	SNP
M17716	2.09049	GAAGAGATTGTCAAAAGGTT	20	SNP		M15164	4.03276	GGTATGGAACCACGCTATGT	20	SNP
M17718	2.29972	GAAGAGATTGTCAATAGGTT	20	SNP		M15193	3.42248	AGTATGGAACAACGCTATGT	20	SNP
M17725	2.27088	GAAGAGATTGTCAACAGATT	20	SNP		M15200	2.9446	AGTATGGAACCAGGCTATGT	20	SNP
M17881	2.43245	TTGAGAAGGACCCCGAAAGGG	21	SNP		M15203	5.40402	AGTATGGAACCACCCTATGT	20	SNP
M18032	2.45833	GAAGAGATTGTCAAGAGGTTT	21	SNP		M15219	2.38044	AGTATGGAACCACGCTATTT	20	SNP
M18036	2.65695	GAAGAGATTGTCAACTGGTTT	21	SNP		M15220	2.49998	AGTATGGAACCACGCTATGA	20	SNP
						M15305	3.09065	GCTAAGGCATCTAAGGTATGG	21	SNP
						M15307	3.23204	GCTAACACATCTAAGGTATGG	21	SNP
						M15312	2.45285	GCTAACGTATCTAAGGTATGG	21	SNP
						M15313	2.28959	GCTAACGCCTCTAAGGTATGG	21	SNP
						M15315	2.76828	GCTAACGCTTCTAAGGTATGG	21	SNP
						M15320	2.91074	GCTAACGCATGTAAGGTATGG	21	SNP
						M15329	2.46726	GCTAACGCATCTAGGGTATGG	21	SNP
						M15351	2.71217	GCTAACGCATCTAAGGTATGT	21	SNP
						M15555	3.48165	ATCTATCTTGATGTTAGTACCG	22	SNP
						M15588	5.21516	ATCTAACTTGATGTTATTACCG	22	SNP
						M15630	2.8411	ACGTACGGTTCTCATAGGAAGA	22	SNP
						M15682	3.17432	GGCTATAGCAGGAGCGTGCGTC	22	SNP
						M16089	3.50134	ATGCCGTAGTTTGCTGCGAT	20	SNP
						M16102	2.54249	ATGCCGGAGTTAGCTGCGAT	20	SNP
						M16134	3.50148	GTGGGAGAAGCCGAAACCGGC	21	SNP
						M16413	3.34206	CGGATTGTATCCCTCGATGC	20	SNP
						M16721	3.82415	ACCAGCGGATTTGAGCCGGCG	21	SNP
						M17020	5.15344	CGAACGTTTTACGAAGATACGGT	23	SNP
						M17299	2.51694	AGAAAAAGATCGCGAGGAAG	20	SNP
						M17318	2.22537	AGAGAAAGACCGCGAGGAAG	20	SNP
						M17322	2.61574	AGAGAAAGATTGCGAGGAAG	20	SNP
						M17324	2.62563	AGAGAAAGATCCCGAGGAAG	20	SNP
						M17326	2.19064	AGAGAAAGATCGAGAGGAAG	20	SNP
						M17328	2.78422	AGAGAAAGATCGTGAGGAAG	20	SNP
						M17330	2.90119	AGAGAAAGATCGCCAGGAAG	20	SNP
						M17345	2.28695	AGAGAAAGATCGCGAGGAGG	20	SNP
						M17491	3.9823	CTATGATTCCGGCGTTACCAAAA	23	SNP
						M17527	3.07793	CTATGGTTCCGGCGTTAACAAAA	23	SNP
						M17586	2.83918	GGAGGGGACGAAGTTCTCGTTCT	23	SNP
						M17681	2.44151	GAGGAGATTGTCAACAGGTT	20	SNP
						M17703	2.49898	GAAGAGATTTTCAACAGGTT	20	SNP
						M17707	2.89471	GAAGAGATTGTAAACAGGTT	20	SNP
						M17871	2.63906	TGGAGCAGGACCCCGAAAGGG	21	SNP
						M17877	2.49276	TTGTGCAGGACCCCGAAAGGG	21	SNP
						M17878	2.74719	TTGAACAGGACCCCGAAAGGG	21	SNP
						M17908	2.46616	TTGAGCAGGACCCCAAAAGGG	21	SNP
						M17973	3.59373	CAGTATGGAACCACTCTATG	20	SNP
						M18037	2.44828	GAAGAGATTGTCAACAAGTTT	21	SNP
						M18046	2.61545	GAAGAGATTGTCAACAGGTAT	21	SNP
						M18047	2.20732	GAAGAGATTGTCAACAGGTCT	21	SNP

## Sheet: Fig3C
20	21	22	23		Tukey's multiple comparisons test	Mean Diff.	95.00% CI of diff.	Significant?	Summary	Adjusted P Value
3.20826	2.61512	4.53655	6.14822
3.8839	2.25241	4.72495	4.66926		20 vs. 21	-0.6664	-1.146 to -0.1869	Yes	**	0.0023
2.45486	4.48402	4.02181	4.23781		20 vs. 22	-1.013	-1.505 to -0.5202	Yes	****	<0.0001
3.94807	4.64713	3.28012	5.71124		20 vs. 23	-1.54	-2.254 to -0.8263	Yes	****	<0.0001
2.30753	4.05566	4.50179	5.27417		21 vs. 22	-0.3464	-0.9252 to 0.2325	No	ns	0.4092
3.33901	5.24731	3.36399	4.40402		21 vs. 23	-0.8735	-1.649 to -0.09781	Yes	*	0.0204
4.91886	4.16554	4.49237	4.54975		22 vs. 23	-0.5271	-1.311 to 0.2567	No	ns	0.3043
4.39487	4.25502	5.14519	3.77433
2.59418	4.62434	4.92871	5.26913
2.48072	4.41011	5.5422	7.04854
5.61537	3.0777	3.78752	3.73477
2.41533	5.51531	6.27192	7.03224
3.5018	3.50703	2.8561	4.66889
3.31635	6.36118	5.39037	5.54128
5.29002	3.62314	6.89476	3.74783
3.00955	5.20831	4.50855
3.71762	2.19452	6.7652
3.61521	4.92892	4.64876
2.97292	4.57949	5.87373
3.37471	3.66518	4.68631
3.44142	3.27509	5.78634
2.01036	4.45305	2.72906
4.51759	4.35369	5.11298
4.22011	6.38885	3.10076
5.84833	3.8851	4.45112
3.03308	5.31599	4.59312
3.5196	5.1161	4.44634
2.65207	2.78787	5.84663
2.77588	3.96923	3.80702
2.62136	2.647	3.82841
3.164	3.72555	5.00503
2.55364	6.38057	4.57106
2.65322	3.98701	2.67256
3.4741	4.44712	4.53253
3.89717	5.72339	2.54821
3.04023	3.67757	3.81337
2.9457	3.54471	5.14124
3.40548	5.51226	3.8183
4.29482	3.81804
5.59438	2.4187
3.4142	2.56006
3.52609
2.16925
3.5025
3.44973
3.24925
2.99746
2.99788
2.96603
5.01715
3.95339
4.19507
4.33117
2.24528
3.59677
2.66891
2.93284
4.25072
3.5116
4.125
4.52428
3.49023
2.97188
3.67004
3.22522
3.04987
2.50105
3.20379
2.88558
4.77904
3.35821
4.92184
3.07509
3.1249
2.49657
2.30376
3.44185
2.87622
4.06752
2.54156
2.18514
3.69513
3.20187
4.24756
5.57099
4.61525
5.04487
4.93271
3.42825
3.40439
2.92493
3.44904
3.51447
4.8591
2.75844
3.89553

## Sheet: Fig3D
sgRNA	Start	End	logFC
M45	3506	3525	3.52609
M292	3259	3278	2.16925
M601	2950	2969	3.5025
M602	2949	2968	3.44973
M612	2939	2958	3.24925
M792	2759	2778	2.99746
M896	2655	2674	2.99788
M905	2646	2665	2.96603
M1101	2450	2469	5.01715
M1121	2430	2449	3.95339
M1152	2399	2418	4.19507
M1153	2398	2417	4.33117
M1161	2390	2409	2.24528
M1195	2356	2375	3.59677
M1196	2355	2374	2.66891
M1198	2353	2372	2.93284
M1258	2293	2312	4.25072
M1365	2186	2205	3.5116
M1394	2157	2176	4.125
M1449	2102	2121	4.52428
M1541	2010	2029	3.49023
M1612	1939	1958	2.97188
M1613	1938	1957	3.67004
M1617	1934	1953	3.22522
M1732	1819	1838	3.04987
M1748	1803	1822	2.50105
M1760	1791	1810	3.20379
M1761	1790	1809	2.88558
M1783	1768	1787	4.77904
M1786	1765	1784	3.35821
M1876	1675	1694	4.92184
M1962	1589	1608	3.07509
M2057	1494	1513	3.1249
M2126	1425	1444	2.49657
M2287	1264	1283	2.30376
M2376	1175	1194	3.44185
M2575	976	995	2.87622
M2592	959	978	4.06752
M2673	878	897	2.54156
M2745	806	825	2.18514
M2785	766	785	3.69513
M3003	548	567	3.20187
M3096	455	474	4.24756
M3202	349	368	5.57099
M3207	344	363	4.61525
M3210	341	360	5.04487
M3220	331	350	4.93271
M3329	222	241	3.42825
M3366	185	204	3.40439
M3404	147	166	2.92493
M3413	138	157	3.44904
M3419	132	151	3.51447
M3421	130	149	4.8591
M3501	50	69	2.75844
M3523	28	47	3.89553
M3615	3484	3504	2.19452
M4337	2762	2782	4.92892
M4442	2657	2677	4.57949
M4532	2567	2587	3.66518
M4735	2364	2384	3.27509
M4746	2353	2373	4.45305
M4785	2314	2334	4.35369
M4786	2313	2333	6.38885
M4903	2196	2216	3.8851
M5121	1978	1998	5.31599
M5202	1897	1917	5.1161
M5207	1892	1912	2.78787
M5296	1803	1823	3.96923
M5363	1736	1756	2.647
M5372	1727	1747	3.72555
M5715	1384	1404	6.38057
M5785	1314	1334	3.98701
M5800	1299	1319	4.44712
M6186	913	933	5.72339
M6492	607	627	3.67757
M6763	336	356	3.54471
M6878	221	241	5.51226
M6954	145	165	3.81804
M7010	89	109	2.4187
M7063	36	56	2.56006
M7136	3510	3531	5.87373
M7242	3404	3425	4.68631
M7682	2964	2985	5.78634
M7701	2945	2966	2.72906
M7723	2923	2944	5.11298
M7818	2828	2849	3.10076
M7990	2656	2677	4.45112
M8254	2392	2413	4.59312
M8268	2378	2399	4.44634
M8295	2351	2372	5.84663
M8457	2189	2210	3.80702
M8824	1822	1843	3.82841
M8835	1811	1832	5.00503
M8978	1668	1689	4.57106
M9485	1161	1182	2.67256
M9787	859	880	4.53253
M9989	657	678	2.54821
M10305	341	362	3.81337
M10431	215	236	5.14124
M10471	175	196	3.8183
M10687	3505	3527	7.04854
M11770	2422	2444	3.73477
M11888	2304	2326	7.03224
M12466	1726	1748	4.66889
M12585	1607	1629	5.54128
M12588	1604	1626	3.74783
M13851	341	363	3.30603

## Sheet: Fig3F
Apo	Control	23 guide	Cas9 - 23	Cas9-23 scr	22 guide	Cas9-22	Cas9-22 scr
1200000000000	1200000000000	1200000000000	60000000000	600000000000	1200000000000	60000000000	600000000000
800000000000	800000000000	600000000000	60000000000	800000000000	2000000000000	60000000000	800000000000
800000000000	800000000000	800000000000	40000000000	1000000000000	400000000000	120000000000	400000000000
