# Supplementary material for: RNA-dependent RNA targeting by CRISPR-Cas9
Source: eLife journal article supplement (doi:10.7554/elife.32724), 2018-01-05
Supplement: supp [file elife-32724-supp-v1.zip › elife_poa_e32724_Figure_4_figure_supplement_1_source_data_1.xlsx]

## Sheet: GFP
FigS10A	Time [s]	Null-Null_1	Null-Null_2	Null-Null_3	Time [s]	Sa-Null_1	Sa-Null_2	Sa-Null_3	Time [s]	Guide GFP2 coding_1	Guide GFP2 coding_2	Guide GFP2 coding_3	Time [s]	RNP GFP2 coding_1	RNP GFP2 coding_2	RNP GFP2 coding_3	Time [s]	Guide GFP2 noncoding_1	Guide GFP2 noncoding_2	Guide GFP2 noncoding_3	Time [s]	RNP GFP2 noncoding_1	RNP GFP2 noncoding_2	RNP GFP2 noncoding_3	Time [s]	Guide GFP6 coding_1	Guide GFP6 coding_2	Guide GFP6 coding_3	Time [s]	RNP GFP6 coding_1	RNP GFP6 coding_2	RNP GFP6 coding_3	Time [s]	Guide GFP6 noncoding_1	Guide GFP6 noncoding_2	Guide GFP6 noncoding_3	Time [s]	RNP GFP6 noncoding_1	RNP GFP6 noncoding_2	RNP GFP6 noncoding_3		FigS10C	Time [s]	Null-Null_1	Null-Null_2	Null-Null_3	Time [s]	dSa-Null_1	dSa-Null_2
	0	107.778	81.7778	104.778	0	98.7778	96.7778	108.778	0	62.4444	53.4444	58.4444	0	28.4444	34.4444	26.4444	0	95.8333	117.833	111.833	0	135.833	154.833	157.833	0	53.4444	42.4444	37.4444	0	36.4444	46.4444	21.4444	0	66.8	61.8	101.8	0	56.8	66.8	47.8			0	107.778	81.7778	104.778	0	98.7778	96.7778
	655.9	118	87	114	655.9	107	104	120	657	65.6667	56.6667	61.6667	657	29.6667	36.6667	27.6667	671.5	101.333	122.333	116.333	671.5	141.333	160.333	163.333	657	58.6667	44.6667	41.6667	657	40.6667	48.6667	23.6667	681.2	69.4	61.4	105.4	681.2	59.4	69.4	53.4			655.9	118	87	114	655.9	107	104
	1311.8	123.444	93.4444	121.444	1311.8	109.444	108.444	123.444	1314	70.1111	62.1111	67.1111	1314	30.1111	38.1111	30.1111	1343	110.5	127.5	121.5	1343	148.5	166.5	170.5	1314	63.1111	49.1111	47.1111	1314	41.1111	49.1111	24.1111	1362.5	70.6	63.6	106.6	1362.5	60.6	69.6	53.6			1311.8	123.444	93.4444	121.444	1311.8	109.444	108.444
	1967.8	135.889	103.889	130.889	1967.8	111.889	113.889	126.889	1971	80.1111	70.1111	77.1111	1971	32.1111	40.1111	32.1111	2014.5	119.167	133.167	126.167	2014.5	155.167	174.167	181.167	1971	74.1111	59.1111	56.1111	1971	45.1111	52.1111	25.1111	2043.7	73.9	64.9	108.9	2043.7	63.9	70.9	54.9			1967.8	135.889	103.889	130.889	1967.8	111.889	113.889
	2623.7	151.444	115.444	146.444	2623.7	119.444	117.444	131.444	2628	92.8889	81.8889	88.8889	2628	34.8889	40.8889	33.8889	2686	129	138	133	2686	164	184	188	2628	88.8889	71.8889	66.8889	2628	45.8889	51.8889	25.8889	2725	75.9	68.9	112.9	2725	66.9	72.9	56.9			2623.7	151.444	115.444	146.444	2623.7	119.444	117.444
	3279.7	169.111	132.111	165.111	3279.7	121.111	124.111	136.111	3285	107.444	94.4444	104.444	3285	35.4444	43.4444	36.4444	3357.5	135.333	143.333	137.333	3357.5	171.333	190.333	196.333	3285	105.444	88.4444	80.4444	3285	49.4444	53.4444	27.4444	3406.3	79.5	71.5	117.5	3406.3	67.5	74.5	59.5			3279.7	169.111	132.111	165.111	3279.7	121.111	124.111
	3935.6	191.667	150.667	185.667	3935.6	127.667	126.667	140.667	3942	125.556	109.556	121.556	3942	36.5556	44.5556	36.5556	4029	146.5	149.5	145.5	4029	179.5	196.5	203.5	3942	126.556	104.556	97.5556	3942	51.5556	53.5556	29.5556	4087.5	83.2	74.2	123.2	4087.5	71.2	76.2	62.2			3935.6	191.667	150.667	185.667	3935.6	127.667	126.667
	4591.6	213	169	208	4591.6	129	130	145	4599	145.556	127.556	143.556	4599	39.5556	45.5556	36.5556	4700.5	155	159	153	4700.5	187	204	212	4599	148.556	127.556	114.556	4599	52.5556	54.5556	30.5556	4768.8	86.4	77.4	127.4	4768.8	72.4	77.4	64.4			4591.6	213	169	208	4591.6	129	130
	5247.5	237.778	188.778	229.778	5247.5	131.778	131.778	146.778	5256	169.222	147.222	167.222	5256	40.2222	48.2222	39.2222	5372	165	164	160	5372	192	211	215	5256	174.222	150.222	137.222	5256	56.2222	56.2222	32.2222	5450	91.7	81.7	133.7	5450	75.7	79.7	65.7			5247.5	237.778	188.778	229.778	5247.5	131.778	131.778
	5903.4	264.111	215.111	254.111	5903.4	137.111	135.111	149.111	5913	194.778	169.778	190.778	5913	40.7778	48.7778	39.7778	6043.5	176.333	175.333	166.333	6043.5	197.333	215.333	221.333	5913	200.778	176.778	160.778	5913	58.7778	56.7778	34.7778	6131.3	95.5	84.5	138.5	6131.3	77.5	81.5	68.5			5903.4	264.111	215.111	254.111	5903.4	137.111	135.111
	6559.3	292.667	240.667	281.667	6559.3	139.667	141.667	154.667	6570	224	197	222	6570	41	51	42	6715	189.833	180.833	173.833	6715	202.833	221.833	226.833	6570	232	208	186	6570	61	58	35	6812.5	98.3	88.3	145.3	6812.5	80.3	84.3	70.3			6559.3	292.667	240.667	281.667	6559.3	139.667	141.667
	7215.2	325	269	310	7215.2	143	146	157	7227	258.667	225.667	254.667	7227	43.6667	51.6667	43.6667	7386.5	198.667	190.667	182.667	7386.5	205.667	224.667	232.667	7227	268.667	241.667	217.667	7227	62.6667	59.6667	37.6667	7493.8	104.1	92.1	152.1	7493.8	84.1	84.1	73.1			7215.2	325	269	310	7215.2	143	146
	7871.1	357.667	297.667	340.667	7871.1	146.667	148.667	160.667	7884	292.778	255.778	286.778	7884	44.7778	53.7778	43.7778	8058	214.167	200.167	192.167	8058	212.167	231.167	239.167	7884	304.778	274.778	248.778	7884	63.7778	59.7778	37.7778	8175	109.2	97.2	160.2	8175	84.2	86.2	76.2			7871.1	357.667	297.667	340.667	7871.1	146.667	148.667
	8527	389.889	332.889	371.889	8527	148.889	149.889	162.889	8541	328.222	288.222	323.222	8541	46.2222	56.2222	45.2222	8729.5	231.167	209.167	203.167	8729.5	218.167	237.167	245.167	8541	346.222	312.222	285.222	8541	66.2222	66.2222	38.2222	8856.3	114.1	102.1	167.1	8856.3	87.1	90.1	78.1			8527	389.889	332.889	371.889	8527	148.889	149.889
	9182.9	431.778	365.778	407.778	9182.9	151.778	157.778	167.778	9198	367.667	322.667	357.667	9198	47.6667	57.6667	47.6667	9401	242	222	214	9401	222	242	251	9198	388.667	353.667	320.667	9198	68.6667	69.6667	40.6667	9537.5	119.8	105.8	175.8	9537.5	89.8	90.8	80.8			9182.9	431.778	365.778	407.778	9182.9	151.778	157.778
	9838.8	465.222	401.222	444.222	9838.8	157.222	161.222	171.222	9855	403.889	359.889	394.889	9855	50.8889	59.8889	49.8889	10072.5	255.833	233.833	222.833	10072.5	226.833	246.833	254.833	9855	434.889	395.889	357.889	9855	73.8889	71.8889	43.8889	10218.8	124.4	109.4	185.4	10218.8	94.4	92.4	82.4			9838.8	465.222	401.222	444.222	9838.8	157.222	161.222
	10494.7	510.111	445.111	482.111	10494.7	163.111	163.111	174.111	10512	442.667	395.667	435.667	10512	50.6667	60.6667	50.6667	10744.1	271.667	243.667	232.667	10744.1	231.667	253.667	261.667	10512	481.667	439.667	401.667	10512	78.6667	72.6667	43.6667	10900	131.3	115.3	192.3	10900	96.3	94.3	86.3			10494.7	510.111	445.111	482.111	10494.7	163.111	163.111
	11150.7	552.667	486.667	525.667	11150.7	165.667	170.667	178.667	11169	484	432	476	11169	55	64	53	11415.6	287.333	257.333	242.333	11415.6	236.333	261.333	267.333	11169	531	487	449	11169	79	71	48	11581.3	137.2	120.2	203.2	11581.3	99.2	98.2	87.2			11150.7	552.667	486.667	525.667	11150.7	165.667	170.667
	11806.6	602.222	539.222	571.222	11806.6	170.222	175.222	184.222	11826	526.111	473.111	512.111	11826	54.1111	65.1111	54.1111	12087	306.167	270.167	253.167	12087	243.167	267.167	278.167	11826	579.111	529.111	492.111	11826	80.1111	72.1111	55.1111	12262.6	144.7	125.7	212.7	12262.6	100.7	97.7	90.7			11806.6	602.222	539.222	571.222	11806.6	170.222	175.222
	12462.6	654.333	586.333	616.333	12462.6	177.333	181.333	189.333	12483	570.222	514.222	555.222	12483	58.2222	69.2222	56.2222	12758.7	320.833	283.833	265.833	12758.7	248.833	275.833	286.833	12483	629.222	577.222	545.222	12483	84.2222	73.2222	56.2222	12943.8	151.1	132.1	222.1	12943.8	104.1	101.1	92.1			12462.6	654.333	586.333	616.333	12462.6	177.333	181.333
	13118.5	706.111	648.111	667.111	13118.5	182.111	189.111	193.111	13140	617.111	555.111	597.111	13140	60.1111	72.1111	59.1111	13430.3	339.167	302.167	282.167	13430.3	254.167	286.167	295.167	13140	683.111	628.111	588.111	13140	87.1111	76.1111	55.1111	13625.1	159.5	137.5	229.5	13625.1	107.5	102.5	93.5			13118.5	706.111	648.111	667.111	13118.5	182.111	189.111
	13775.1	762.889	698.889	717.889	13775.1	188.889	195.889	200.889	13797	668	602	645	13797	63	76	62	14101.8	355.167	313.167	295.167	14101.8	260.167	305.167	311.167	13797	742	687	645	13797	90	78	54	14306.3	166.9	143.9	241.9	14306.3	109.9	105.9	94.9			13775.1	762.889	698.889	717.889	13775.1	188.889	195.889
	14431	821.556	768.556	772.556	14431	194.556	202.556	204.556	14454	719	646	716	14454	66	78	65	14773.4	372.5	332.5	307.5	14773.4	273.5	315.5	321.5	14454	808	742	695	14454	93	80	55	14987.6	173	148	256	14987.6	113	106	97			14431	821.556	768.556	772.556	14431	194.556	202.556
	15086.9	889.333	844.333	832.333	15086.9	202.333	209.333	211.333	15111	797	691	790	15111	68	80	68	15444.9	387.333	351.333	322.333	15444.9	283.333	306.333	317.333	15111	906	789	740	15111	97	83	55	15668.8	183.9	158.9	272.9	15668.8	116.9	109.9	103.9			15086.9	889.333	844.333	832.333	15086.9	202.333	209.333
	15742.8	971.111	923.111	897.111	15742.8	210.111	218.111	221.111	15768	857.333	761.333	849.333	15768	70.3333	81.3333	71.3333	16116.5	398.833	364.833	337.833	16116.5	293.833	312.833	315.833	15768	991.333	847.333	794.333	15768	100.333	86.3333	58.3333	16350.1	193	165	284	16350.1	120	112	106			15742.8	971.111	923.111	897.111	15742.8	210.111	218.111
	16398.7	1040.22	1004.22	968.222	16398.7	218.222	228.222	229.222	16425.1	899.111	821.111	880.111	16425.1	72.1111	83.1111	73.1111	16788	401.333	387.333	356.333	16788	301.333	313.333	324.333	16425.1	1055.11	905.111	846.111	16425.1	103.111	88.1111	59.1111	17031.3	202.5	174.5	287.5	17031.3	123.5	115.5	109.5			16398.7	1040.22	1004.22	968.222	16398.7	218.222	228.222
	17054.7	1122	1098	1028	17054.7	230	239	243	17082.1	932.889	864.889	907.889	17082.1	75.8889	87.8889	74.8889	17459.5	407.833	404.833	372.833	17459.5	300.833	312.833	322.833	17082.1	1106.89	982.889	896.889	17082.1	107.889	91.8889	61.8889	17712.6	211.7	181.7	310.7	17712.6	126.7	118.7	111.7			17054.7	1122	1098	1028	17054.7	230	239
	17710.6	1194.44	1205.44	1069.44	17710.6	243.444	248.444	259.444	17739.1	948.333	887.333	924.333	17739.1	77.3333	88.3333	77.3333	18131	427	425	388	18131	302	313	331	17739.1	1137.33	1070.33	968.333	17739.1	110.333	93.3333	62.3333	18393.8	227.4	190.4	303.4	18393.8	131.4	121.4	110.4			17710.6	1194.44	1205.44	1069.44	17710.6	243.444	248.444
	18366.5	1304.33	1333.33	1142.33	18366.5	257.333	263.333	274.333	18396.1	974.333	912.333	951.333	18396.1	78.3333	90.3333	78.3333	18802.5	448.167	438.167	403.167	18802.5	304.167	317.167	336.167	18396.1	1180.33	1126.33	1050.33	18396.1	113.333	97.3333	65.3333	19075.1	237.2	199.2	312.2	19075.1	135.2	128.2	111.2			18366.5	1304.33	1333.33	1142.33	18366.5	257.333	263.333
	19022.4	1456.11	1462.11	1236.11	19022.4	270.111	281.111	287.111	19053.1	1000.22	938.222	977.222	19053.1	82.2222	95.2222	80.2222	19474	455.5	456.5	419.5	19474	305.5	320.5	342.5	19053.1	1227.22	1174.22	1120.22	19053.1	118.222	101.222	68.2222	19756.3	247.6	209.6	326.6	19756.3	138.6	130.6	114.6			19022.4	1456.11	1462.11	1236.11	19022.4	270.111	281.111
	19678.3	1567.11	1549.11	1306.11	19678.3	286.111	310.111	294.111	19710.1	1032.44	977.444	1002.44	19710.1	83.4444	96.4444	83.4444	20145.5	457.667	472.667	434.667	20145.5	310.667	321.667	346.667	19710.1	1262.44	1213.44	1176.44	19710.1	121.444	103.444	72.4444	20437.5	262	221	343	20437.5	142	135	119			19678.3	1567.11	1549.11	1306.11	19678.3	286.111	310.111
	20334.2	1660.33	1624.33	1405.33	20334.2	300.333	333.333	299.333	20367.1	1062	1011	1033	20367.1	86	97	85	20817	475.333	491.333	456.333	20817	313.333	326.333	353.333	20367.1	1292	1242	1217	20367.1	126	108	73	21118.8	275	230	358	21118.8	146	135	122			20334.2	1660.33	1624.33	1405.33	20334.2	300.333	333.333
	20990.1	1721.89	1693.89	1518.89	20990.1	317.889	356.889	311.889	21024.1	1094.44	1033.44	1066.44	21024.1	88.4444	98.4444	87.4444	21488.5	475.333	507.333	469.333	21488.5	316.333	329.333	358.333	21024.1	1310.44	1273.44	1244.44	21024.1	130.444	110.444	75.4444	21800	287.2	241.2	374.2	21800	149.2	137.2	126.2			20990.1	1721.89	1693.89	1518.89	20990.1	317.889	356.889
	21646	1769.78	1750.78	1613.78	21646	337.778	379.778	321.778	21681.1	1123.11	1069.11	1101.11	21681.1	90.1111	100.111	88.1111	22160	482	529	491	22160	322	336	366	21681.1	1333.11	1313.11	1271.11	21681.1	135.111	114.111	79.1111	22481.3	300.7	251.7	388.7	22481.3	154.7	140.7	128.7			21646	1769.78	1750.78	1613.78	21646	337.778	379.778
	22302	1798.22	1791.22	1702.22	22302	360.222	401.222	338.222	22338.1	1148.44	1101.44	1130.44	22338.1	91.4444	103.444	90.4444	22831.5	489.667	548.667	512.667	22831.5	329.667	341.667	369.667	22338.1	1350.44	1342.44	1295.44	22338.1	138.444	116.444	81.4444	23162.6	315.8	262.8	407.8	23162.6	155.8	143.8	131.8			22302	1798.22	1791.22	1702.22	22302	360.222	401.222
	22957.9	1833	1821	1761	22957.9	386	427	349	22995.1	1161.56	1121.56	1153.56	22995.1	93.5556	103.556	92.5556	23503	498.5	564.5	534.5	23503	332.5	344.5	374.5	22995.1	1351.56	1353.56	1305.56	22995.1	142.556	120.556	83.5556	23843.8	330.4	276.4	424.4	23843.8	159.4	147.4	134.4			22957.9	1833	1821	1761	22957.9	386	427
	23613.8	1858.44	1855.44	1769.44	23613.8	404.444	451.444	361.444	23652.1	1173.11	1138.11	1171.11	23652.1	95.1111	105.111	94.1111	24174.5	519.167	588.167	561.167	24174.5	339.167	348.167	381.167	23652.1	1360.11	1363.11	1309.11	23652.1	146.111	123.111	86.1111	24525	343.9	288.9	445.9	24525	163.9	153.9	141.9			23613.8	1858.44	1855.44	1769.44	23613.8	404.444	451.444
	24269.7	1870.11	1896.11	1797.11	24269.7	434.111	477.111	378.111	24309.1	1181.33	1146.33	1182.33	24309.1	97.3333	107.333	96.3333	24846	541.167	607.167	587.167	24846	344.167	352.167	383.167	24309.1	1351.33	1362.33	1294.33	24309.1	150.333	127.333	90.3333	25206.3	359.2	301.2	463.2	25206.3	166.2	156.2	141.2			24269.7	1870.11	1896.11	1797.11	24269.7	434.111	477.111
	24925.8	1865.33	1921.33	1821.33	24925.8	455.333	509.333	399.333	24966.1	1182.78	1157.78	1189.78	24966.1	98.7778	108.778	95.7778	25517.5	551.667	618.667	610.667	25517.5	347.667	355.667	388.667	24966.1	1344.78	1357.78	1290.78	24966.1	154.778	131.778	92.7778	25887.6	373.7	317.7	480.7	25887.6	172.7	161.7	145.7			24925.8	1865.33	1921.33	1821.33	24925.8	455.333	509.333
	25581.6	1887.22	1946.22	1848.22	25581.6	483.222	546.222	420.222	25623.8	1184.78	1165.78	1187.78	25623.8	98.7778	109.778	96.7778	26189	572.167	635.167	637.167	26189	352.167	359.167	391.167	25623.8	1339.78	1354.78	1283.78	25623.8	157.778	133.778	94.7778	26568.8	388.3	326.3	495.3	26568.8	175.3	165.3	146.3			25581.6	1887.22	1946.22	1848.22	25581.6	483.222	546.222
	26237.6	1918.78	1972.78	1870.78	26237.6	514.778	582.778	443.778	26280.9	1184.22	1173.22	1184.22	26280.9	100.222	111.222	99.2222	26860.5	593	650	663	26860.5	354	362	393	26280.9	1334.22	1352.22	1275.22	26280.9	160.222	138.222	97.2222	27250.1	403	339	514	27250.1	181	172	151			26237.6	1918.78	1972.78	1870.78	26237.6	514.778	582.778
	26893.6	1948.56	1998.56	1893.56	26893.6	533.556	630.556	466.556	26937.9	1183.89	1177.89	1186.89	26937.9	101.889	111.889	98.8889	27532	608.167	655.167	691.167	27532	356.167	363.167	395.167	26937.9	1319.89	1345.89	1258.89	26937.9	164.889	139.889	99.8889	27931.3	425.3	352.3	533.3	27931.3	186.3	176.3	155.3			26893.6	1948.56	1998.56	1893.56	26893.6	533.556	630.556
	27549.5	1959.22	2026.22	1921.22	27549.5	566.222	675.222	490.222	27594.9	1180.56	1181.56	1186.56	27594.9	102.556	113.556	104.556	28203.5	626.833	653.833	709.833	28203.5	359.833	363.833	394.833	27594.9	1292.56	1343.56	1247.56	27594.9	169.556	144.556	104.556	28612.6	445.5	367.5	551.5	28612.6	192.5	180.5	157.5			27549.5	1959.22	2026.22	1921.22	27549.5	566.222	675.222
	28205.4	1986.89	2043.89	1938.89	28205.4	598.889	720.889	518.889	28251.9	1174.56	1179.56	1184.56	28251.9	105.556	113.556	103.556	28875.1	645	669	732	28875.1	360	367	398	28251.9	1288.56	1333.56	1229.56	28251.9	172.556	147.556	105.556	29293.8	465.7	384.7	567.7	29293.8	191.7	184.7	160.7			28205.4	1986.89	2043.89	1938.89	28205.4	598.889	720.889
	28861.4	2003.67	2066.67	1946.67	28861.4	634.667	768.667	545.667	28908.9	1171.44	1176.44	1182.44	28908.9	106.444	114.444	102.444	29546.5	659.167	675.167	749.167	29546.5	364.167	370.167	400.167	28908.9	1281.44	1328.44	1224.44	28908.9	175.444	149.444	109.444	29975.1	489.4	405.4	586.4	29975.1	198.4	191.4	163.4			28861.4	2003.67	2066.67	1946.67	28861.4	634.667	768.667
	29517.4	2005.56	2091.56	1966.56	29517.4	675.556	822.556	574.556	29565.9	1164	1173	1178	29565.9	107	118	105	30218	671.833	683.833	766.833	30218	365.833	370.833	401.833	29565.9	1273	1316	1218	29565.9	179	154	113	30656.3	512.6	420.6	611.6	30656.3	203.6	197.6	168.6			29517.4	2005.56	2091.56	1966.56	29517.4	675.556	822.556
	30173.3	2005.22	2096.22	1981.22	30173.3	719.222	880.222	608.222	30222.9	1158.44	1168.44	1173.44	30222.9	108.444	116.444	104.444	30890.2	689.333	694.333	778.333	30890.2	367.333	371.333	402.333	30222.9	1268.44	1295.44	1213.44	30222.9	180.444	156.444	114.444	31337.6	536.7	437.7	624.7	31337.6	206.7	201.7	169.7			30173.3	2005.22	2096.22	1981.22	30173.3	719.222	880.222
	30829.2	2027.11	2112.11	1999.11	30829.2	772.111	931.111	641.111	30879.9	1154.67	1164.67	1165.67	30879.9	107.667	118.667	105.667	31561.7	702.5	711.5	794.5	31561.7	369.5	373.5	405.5	30879.9	1263.67	1279.67	1209.67	30879.9	182.667	157.667	119.667	32018.8	566.5	458.5	649.5	32018.8	212.5	210.5	175.5			30829.2	2027.11	2112.11	1999.11	30829.2	772.111	931.111
	31485.1	2045.89	2103.89	2001.89	31485.1	816.889	990.889	673.889	31536.9	1143.56	1160.56	1160.56	31536.9	110.556	119.556	107.556	32233.2	719.5	729.5	813.5	32233.2	369.5	374.5	404.5	31536.9	1256.56	1264.56	1199.56	31536.9	187.556	163.556	124.556	32700.1	590.5	480.5	678.5	32700.1	218.5	215.5	176.5			31485.1	2045.89	2103.89	2001.89	31485.1	816.889	990.889
	32141	2064.11	2114.11	1999.11	32141	877.111	1049.11	709.111	32193.9	1143.11	1158.11	1161.11	32193.9	112.111	121.111	109.111	32904.7	729	745	829	32904.7	373	375	404	32193.9	1254.11	1264.11	1193.11	32193.9	189.111	167.111	127.111	33381.3	619.7	504.7	702.7	33381.3	227.7	222.7	183.7			32141	2064.11	2114.11	1999.11	32141	877.111	1049.11
	32796.9	2082.78	2141.78	1999.78	32796.9	930.778	1105.78	745.778	32850.9	1135.33	1148.33	1155.33	32850.9	112.333	121.333	110.333	33576.4	741	767	842	33576.4	372	377	410	32850.9	1248.33	1259.33	1191.33	32850.9	192.333	169.333	130.333	34062.6	640.9	527.9	722.9	34062.6	229.9	231.9	188.9			32796.9	2082.78	2141.78	1999.78	32796.9	930.778	1105.78
	33452.8	2102.78	2154.78	1989.78	33452.8	990.778	1164.78	785.778	33507.9	1125.56	1144.56	1146.56	33507.9	113.556	123.556	111.556	34247.8	747.833	789.833	859.833	34247.8	373.833	377.833	408.833	33507.9	1244.56	1248.56	1186.56	33507.9	196.556	171.556	131.556	34744.5	663	545	740	34744.5	236	235	191			33452.8	2102.78	2154.78	1989.78	33452.8	990.778	1164.78
	34108.9	2120.44	2171.44	1999.44	34108.9	1039.44	1222.44	821.444	34164.9	1119.89	1139.89	1138.89	34164.9	114.889	123.889	111.889	34919.4	759.5	807.5	874.5	34919.4	376.5	378.5	409.5	34164.9	1234.89	1247.89	1175.89	34164.9	199.889	173.889	135.889	35425.8	682.9	562.9	749.9	35425.8	240.9	242.9	195.9			34108.9	2120.44	2171.44	1999.44	34108.9	1039.44	1222.44
	34764.7	2134.67	2197.67	2027.67	34764.7	1095.67	1275.67	856.667	34821.9	1116.78	1134.78	1134.78	34821.9	114.778	123.778	112.778	35590.8	769.667	828.667	893.667	35590.8	374.667	378.667	410.667	34821.9	1228.78	1239.78	1170.78	34821.9	199.778	175.778	138.778	36107.1	708.4	588.4	754.4	36107.1	247.4	246.4	197.4			34764.7	2134.67	2197.67	2027.67	34764.7	1095.67	1275.67
	35420.7	2156.11	2217.11	2039.11	35420.7	1147.11	1329.11	900.111	35478.9	1111.33	1129.33	1127.33	35478.9	114.333	125.333	114.333	36262.3	771.833	846.833	908.833	36262.3	375.833	376.833	408.833	35478.9	1225.33	1235.33	1165.33	35478.9	202.333	180.333	142.333	36788.3	732.8	613.8	767.8	36788.3	253.8	252.8	203.8			35420.7	2156.11	2217.11	2039.11	35420.7	1147.11	1329.11
	36076.6	2176.44	2231.44	2049.44	36076.6	1208.44	1377.44	934.444	36135.9	1103.33	1124.33	1123.33	36135.9	115.333	128.333	114.333	36933.8	788.167	867.167	929.167	36933.8	378.167	379.167	410.167	36135.9	1216.33	1232.33	1162.33	36135.9	205.333	182.333	144.333	37469.6	749.2	631.2	775.2	37469.6	257.2	257.2	204.2			36076.6	2176.44	2231.44	2049.44	36076.6	1208.44	1377.44
	36732.5	2190.44	2235.44	2060.44	36732.5	1248.44	1423.44	970.444	36792.9	1097.89	1121.89	1115.89	36792.9	116.889	128.889	115.889	37605.3	788.5	877.5	935.5	37605.3	380.5	379.5	412.5	36792.9	1212.89	1223.89	1152.89	36792.9	206.889	181.889	148.889	38150.8	772.5	651.5	787.5	38150.8	263.5	262.5	210.5			36732.5	2190.44	2235.44	2060.44	36732.5	1248.44	1423.44
	37388.4	2195.44	2245.44	2072.44	37388.4	1298.44	1472.44	1008.44	37449.9	1087	1107	1108	37449.9	117	128	116	38276.8	797.833	902.833	938.833	38276.8	378.833	378.833	410.833	37449.9	1198	1214	1141	37449.9	208	183	147	38832.1	786	673	796	38832.1	270	271	214			37388.4	2195.44	2245.44	2072.44	37388.4	1298.44	1472.44
	38044.3	2212	2265	2075	38044.3	1338	1524	1047	38106.9	1078.78	1102.78	1096.78	38106.9	117.778	127.778	115.778	38948.3	806.333	928.333	949.333	38948.3	382.333	379.333	407.333	38106.9	1195.78	1211.78	1139.78	38106.9	209.778	184.778	151.778	39513.3	802	688	800	39513.3	275	274	218			38044.3	2212	2265	2075	38044.3	1338	1524
	38700.2	2218.56	2275.56	2096.56	38700.2	1377.56	1567.56	1086.56	38763.9	1073.67	1099.67	1091.67	38763.9	119.667	128.667	116.667	39619.8	810.667	950.667	969.667	39619.8	381.667	380.667	412.667	38763.9	1187.67	1204.67	1129.67	38763.9	212.667	186.667	153.667	40194.5	817.7	706.7	805.7	40194.5	282.7	280.7	219.7			38700.2	2218.56	2275.56	2096.56	38700.2	1377.56	1567.56
	39356.1	2215.11	2279.11	2091.11	39356.1	1405.11	1600.11	1111.11	39420.9	1068.56	1093.56	1089.56	39420.9	119.556	130.556	117.556	40291.3	808.167	967.167	987.167	40291.3	381.167	382.167	410.167	39420.9	1182.56	1196.56	1118.56	39420.9	212.556	188.556	156.556	40875.8	826	729	810	40875.8	287	287	227			39356.1	2215.11	2279.11	2091.11	39356.1	1405.11	1600.11
	40012	2237.78	2288.78	2097.78	40012	1441.78	1628.78	1145.78	40077.9	1059.33	1081.33	1080.33	40077.9	120.333	129.333	118.333	40962.8	813	985	1007	40962.8	380	383	412	40077.9	1172.33	1188.33	1112.33	40077.9	214.333	191.333	158.333	41557.1	839.1	745.1	808.1	41557.1	293.1	292.1	231.1			40012	2237.78	2288.78	2097.78	40012	1441.78	1628.78
	40668	2237.11	2299.11	2107.11	40668	1469.11	1673.11	1178.11	40734.9	1048.78	1071.78	1065.78	40734.9	118.778	130.778	118.778	41634.3	816.333	999.333	1034.33	41634.3	381.333	380.333	409.333	40734.9	1161.78	1180.78	1103.78	40734.9	215.778	190.778	158.778	42238.8	852	759	812	42238.8	301	299	235			40668	2237.11	2299.11	2107.11	40668	1469.11	1673.11
	41323.9	2254.33	2314.33	2124.33	41323.9	1506.33	1706.33	1217.33	41391.9	1039.78	1069.78	1062.78	41391.9	119.778	129.778	118.778	42305.8	817.667	1027.67	1060.67	42305.8	383.667	381.667	410.667	41391.9	1155.78	1174.78	1096.78	41391.9	215.778	190.778	159.778	42920.1	864.9	778.9	806.9	42920.1	307.9	304.9	239.9			41323.9	2254.33	2314.33	2124.33	41323.9	1506.33	1706.33
	41979.8	2263.89	2318.89	2119.89	41979.8	1535.89	1741.89	1246.89	42048.9	1035.67	1060.67	1052.67	42048.9	123.667	129.667	120.667	42977.3	811.167	1046.17	1076.17	42977.3	380.167	380.167	408.167	42048.9	1146.67	1163.67	1086.67	42048.9	218.667	192.667	160.667	43601.3	883.7	789.7	807.7	43601.3	311.7	309.7	243.7			41979.8	2263.89	2318.89	2119.89	41979.8	1535.89	1741.89
	42635.7	2261.67	2322.67	2122.67	42635.7	1548.67	1767.67	1273.67	42705.9	1030.44	1054.44	1050.44	42705.9	123.444	131.444	119.444	43648.8	806.167	1059.17	1096.17	43648.8	383.167	382.167	411.167	42705.9	1143.44	1160.44	1084.44	42705.9	219.444	193.444	163.444	44282.5	894.6	809.6	803.6	44282.5	318.6	314.6	248.6			42635.7	2261.67	2322.67	2122.67	42635.7	1548.67	1767.67
	43291.6	2264.33	2322.33	2127.33	43291.6	1569.33	1795.33	1305.33	43362.9	1018.67	1044.67	1040.67	43362.9	124.667	130.667	120.667	44320.3	805.167	1072.17	1103.17	44320.3	377.167	375.167	406.167	43362.9	1130.67	1152.67	1073.67	43362.9	220.667	194.667	165.667	44963.8	908.7	829.7	802.7	44963.8	325.7	320.7	253.7			43291.6	2264.33	2322.33	2127.33	43291.6	1569.33	1795.33
	43947.5	2274.89	2326.89	2129.89	43947.5	1589.89	1813.89	1334.89	44019.9	1012.78	1042.78	1032.78	44019.9	121.778	131.778	121.778	44991.8	796.833	1074.83	1112.83	44991.8	378.833	376.833	404.833	44019.9	1122.78	1142.78	1069.78	44019.9	220.778	195.778	166.778	45645	915	841	801	45645	334	328	260			43947.5	2274.89	2326.89	2129.89	43947.5	1589.89	1813.89
	44603.4	2280.11	2335.11	2129.11	44603.4	1606.11	1832.11	1364.11	44676.9	1008.67	1032.67	1027.67	44676.9	122.667	131.667	120.667	45663.3	789.833	1100.83	1131.83	45663.3	378.833	373.833	406.833	44676.9	1115.67	1133.67	1058.67	44676.9	221.667	196.667	166.667	46326.3	921.6	853.6	798.6	46326.3	341.6	332.6	265.6			44603.4	2280.11	2335.11	2129.11	44603.4	1606.11	1832.11
	45259.3	2273.22	2334.22	2129.22	45259.3	1632.22	1852.22	1390.22	45333.9	1001.44	1024.44	1020.44	45333.9	122.444	132.444	122.444	46334.8	796.5	1110.5	1146.5	46334.8	376.5	374.5	405.5	45333.9	1110.44	1123.44	1052.44	45333.9	221.444	197.444	169.444	47007.5	933.5	868.5	800.5	47007.5	348.5	340.5	268.5			45259.3	2273.22	2334.22	2129.22	45259.3	1632.22	1852.22
	45915.2	2275	2331	2132	45915.2	1656	1876	1419	45990.9	990.556	1016.56	1011.56	45990.9	122.556	132.556	122.556	47006.3	813.667	1124.67	1158.67	47006.3	375.667	374.667	407.667	45990.9	1100.56	1118.56	1043.56	45990.9	222.556	196.556	170.556	47688.8	959.5	884.5	809.5	47688.8	352.5	345.5	274.5			45915.2	2275	2331	2132	45915.2	1656	1876
	46571.1	2272.56	2333.56	2134.56	46571.1	1663.56	1883.56	1439.56	46647.9	982.889	1012.89	1002.89	46647.9	123.889	132.889	122.889	47677.8	815.667	1126.67	1167.67	47677.8	375.667	374.667	408.667	46647.9	1089.89	1105.89	1034.89	46647.9	222.889	196.889	168.889	48370	965	897	816	48370	362	351	281			46571.1	2272.56	2333.56	2134.56	46571.1	1663.56	1883.56
	47227	2279	2344	2134	47227	1682	1899	1461	47304.9	975	1006	996	47304.9	124	133	123	48349.3	814.333	1134.33	1192.33	48349.3	373.333	371.333	408.333	47304.9	1084	1100	1030	47304.9	223	199	169	49051.3	977.3	902.3	815.3	49051.3	368.3	356.3	285.3			47227	2279	2344	2134	47227	1682	1899
	47883	2275.78	2340.78	2134.78	47883	1694.78	1912.78	1481.78	47961.9	969.556	999.556	995.556	47961.9	125.556	133.556	123.556	49020.8	800.667	1138.67	1199.67	49020.8	371.667	370.667	409.667	47961.9	1078.56	1098.56	1018.56	47961.9	224.556	199.556	170.556	49732.5	994.9	918.9	819.9	49732.5	376.9	362.9	288.9			47883	2275.78	2340.78	2134.78	47883	1694.78	1912.78
	48538.9	2280	2343	2145	48538.9	1696	1930	1498	48618.9	961.444	987.444	983.444	48618.9	124.444	134.444	122.444	49692.3	814.333	1126.33	1180.33	49692.3	371.333	369.333	410.333	48618.9	1067.44	1088.44	1013.44	48618.9	226.444	198.444	171.444	50413.8	1011.5	923.5	817.5	50413.8	383.5	368.5	294.5			48538.9	2280	2343	2145	48538.9	1696	1930
	49194.8	2273	2338	2144	49194.8	1711	1941	1520	49275.9	951.778	983.778	973.778	49275.9	124.778	132.778	124.778	50363.8	810.5	1109.5	1186.5	50363.8	367.5	369.5	410.5	49275.9	1060.78	1081.78	1007.78	49275.9	224.778	197.778	170.778	51095	1018	930	812	51095	391	372	300			49194.8	2273	2338	2144	49194.8	1711	1941
	49850.8	2275.22	2339.22	2136.22	49850.8	1726.22	1947.22	1532.22	49932.9	946.444	978.444	970.444	49932.9	125.444	135.444	125.444	51035.3	807	1093	1191	51035.3	367	368	408	49932.9	1055.44	1073.44	1000.44	49932.9	225.444	201.444	171.444	51776.3	1017.1	939.1	809.1	51776.3	399.1	378.1	307.1			49850.8	2275.22	2339.22	2136.22	49850.8	1726.22	1947.22
	50506.8	2263.33	2337.33	2132.33	50506.8	1728.33	1963.33	1553.33	50589.9	942.556	969.556	959.556	50589.9	125.556	135.556	125.556	51706.8	794.333	1078.33	1190.33	51706.8	367.333	367.333	406.333	50589.9	1041.56	1067.56	988.556	50589.9	226.556	200.556	172.556	52457.5	1015.3	943.3	807.3	52457.5	406.3	385.3	311.3			50506.8	2263.33	2337.33	2132.33	50506.8	1728.33	1963.33
	51162.7	2263.11	2335.11	2139.11	51162.7	1753.11	1980.11	1572.11	51246.9	931	959	955	51246.9	126	134	125	52378.3	772.5	1069.5	1204.5	52378.3	362.5	366.5	404.5	51246.9	1035	1056	980	51246.9	226	202	172	53138.8	1009.9	951.9	800.9	53138.8	413.9	384.9	315.9			51162.7	2263.11	2335.11	2139.11	51162.7	1753.11	1980.11
	51818.6	2267.11	2339.11	2140.11	51818.6	1756.11	1992.11	1586.11	51903.9	924.333	954.333	946.333	51903.9	125.333	134.333	125.333	53049.9	761	1060	1228	53049.9	366	364	403	51903.9	1028.33	1048.33	973.333	51903.9	226.333	200.333	171.333	53820	1005.4	958.4	796.4	53820	419.4	389.4	318.4			51818.6	2267.11	2339.11	2140.11	51818.6	1756.11	1992.11
	52474.5	2263.11	2336.11	2135.11	52474.5	1772.11	1992.11	1596.11	52560.9	919.222	950.222	941.222	52560.9	125.222	134.222	125.222	53721.4	735.5	1057.5	1237.5	53721.4	364.5	363.5	404.5	52560.9	1023.22	1045.22	970.222	52560.9	228.222	202.222	171.222	54501.2	994.9	957.9	796.9	54501.2	426.9	392.9	323.9			52474.5	2263.11	2336.11	2135.11	52474.5	1772.11	1992.11
	53131.2	2259.11	2333.11	2140.11	53131.2	1782.11	2016.11	1616.11	53217.9	910.444	941.444	931.444	53217.9	124.444	132.444	125.444	54392.9	704.333	1041.33	1221.33	54392.9	360.333	359.333	403.333	53217.9	1011.44	1029.44	957.444	53217.9	227.444	201.444	169.444	55182.5	1000.3	969.3	794.3	55182.5	432.3	397.3	326.3			53131.2	2259.11	2333.11	2140.11	53131.2	1782.11	2016.11
	53787.1	2260.44	2331.44	2141.44	53787.1	1787.44	2008.44	1625.44	53874.9	906.111	934.111	925.111	53874.9	125.111	135.111	126.111	55064.4	705	1009	1216	55064.4	361	359	400	53874.9	1005.11	1028.11	952.111	53874.9	227.111	201.111	170.111	55863.7	1006.8	973.8	790.8	55863.7	440.8	398.8	331.8			53787.1	2260.44	2331.44	2141.44	53787.1	1787.44	2008.44
	54443	2257.11	2327.11	2146.11	54443	1789.11	2033.11	1627.11	54531.9	895.667	922.667	916.667	54531.9	124.667	135.667	125.667	55735.9	698.333	1010.33	1191.33	55735.9	357.333	357.333	400.333	54531.9	995.667	1018.67	942.667	54531.9	225.667	201.667	170.667	56545	1017.4	983.4	779.4	56545	447.4	403.4	335.4			54443	2257.11	2327.11	2146.11	54443	1789.11	2033.11
	55098.9	2245.22	2323.22	2140.22	55098.9	1792.22	2035.22	1639.22	55188.9	889.222	919.222	910.222	55188.9	127.222	134.222	126.222	56407.4	692.333	994.333	1182.33	56407.4	353.333	355.333	397.333	55188.9	990.222	1010.22	937.222	55188.9	228.222	202.222	171.222	57226.3	1018.1	986.1	773.1	57226.3	454.1	408.1	339.1			55098.9	2245.22	2323.22	2140.22	55098.9	1792.22	2035.22
	55754.8	2245.78	2320.78	2138.78	55754.8	1813.78	2056.78	1650.78	55845.9	882.667	913.667	903.667	55845.9	125.667	134.667	125.667	57078.9	684.167	988.167	1169.17	57078.9	352.167	351.167	394.167	55845.9	983.667	1001.67	928.667	55845.9	226.667	199.667	169.667	57907.5	1020.5	991.5	769.5	57907.5	463.5	411.5	342.5			55754.8	2245.78	2320.78	2138.78	55754.8	1813.78	2056.78
	56410.7	2243.89	2312.89	2132.89	56410.7	1818.89	2053.89	1659.89	56502.9	877.889	907.889	896.889	56502.9	125.889	134.889	126.889	57750.4	679.333	979.333	1163.33	57750.4	351.333	351.333	395.333	56502.9	977.889	997.889	920.889	56502.9	227.889	201.889	168.889	58588.7	1021.8	998.8	765.8	58588.7	466.8	413.8	343.8			56410.7	2243.89	2312.89	2132.89	56410.7	1818.89	2053.89
	57066.6	2242	2308	2140	57066.6	1823	2065	1668	57159.9	869	901	891	57159.9	125	136	127	58421.9	673.333	973.333	1126.33	58421.9	350.333	350.333	395.333	57159.9	968	986	913	57159.9	227	201	170	59270	1023.7	992.7	756.7	59270	468.7	416.7	348.7			57066.6	2242	2308	2140	57066.6	1823	2065
	57722.5	2230.89	2299.89	2128.89	57722.5	1839.89	2073.89	1666.89	57816.9	862.333	892.333	883.333	57816.9	127.333	134.333	126.333	59093.4	671.5	950.5	1107.5	59093.4	347.5	346.5	393.5	57816.9	960.333	982.333	905.333	57816.9	227.333	202.333	169.333	59951.2	1024.9	999.9	752.9	59951.2	472.9	418.9	349.9			57722.5	2230.89	2299.89	2128.89	57722.5	1839.89	2073.89
	58378.4	2233.56	2297.56	2131.56	58378.4	1835.56	2083.56	1675.56	58473.9	855.333	887.333	875.333	58473.9	129.333	135.333	126.333	59764.9	667.5	901.5	1066.5	59764.9	345.5	346.5	390.5	58473.9	953.333	971.333	897.333	58473.9	231.333	201.333	169.333	60632.5	1028.1	1003.1	743.1	60632.5	478.1	423.1	352.1			58378.4	2233.56	2297.56	2131.56	58378.4	1835.56	2083.56
	59034.3	2224.11	2292.11	2122.11	59034.3	1827.11	2082.11	1678.11	59130.9	846	878	866	59130.9	126	134	126	60436.4	669.5	898.5	1037.5	60436.4	343.5	344.5	387.5	59130.9	943	964	888	59130.9	230	202	167	61313.7	1042	1004	744	61313.7	482	423	353			59034.3	2224.11	2292.11	2122.11	59034.3	1827.11	2082.11
	59690.2	2203.33	2267.33	2105.33	59690.2	1833.33	2076.33	1676.33	59787.9	839.222	869.222	860.222	59787.9	125.222	134.222	125.222	61107.9	663.333	895.333	995.333	61107.9	343.333	343.333	388.333	59787.9	937.222	955.222	881.222	59787.9	228.222	199.222	166.222	61995	1040.4	1005.4	743.4	61995	487.4	428.4	356.4			59690.2	2203.33	2267.33	2105.33	59690.2	1833.33	2076.33
	60346.1	2197.44	2266.44	2105.44	60346.1	1838.44	2090.44	1678.44	60444.9	833.556	866.556	854.556	60444.9	124.556	133.556	127.556	61779.5	668.833	904.833	968.833	61779.5	339.833	341.833	382.833	60444.9	927.556	945.556	874.556	60444.9	227.556	200.556	165.556	62676.2	1038	998	736	62676.2	493	431	360			60346.1	2197.44	2266.44	2105.44	60346.1	1838.44	2090.44
	61002	2196.56	2264.56	2104.56	61002	1848.56	2102.56	1678.56	61101.9	825.889	854.889	841.889	61101.9	125.889	133.889	124.889									61101.9	918.889	936.889	862.889	61101.9	225.889	197.889	166.889	63357.5	1030	1008	730	63357.5	495	432	362			61002	2196.56	2264.56	2104.56	61002	1848.56	2102.56
	61658	2192.67	2260.67	2099.67	61658	1850.67	2107.67	1681.67	61759	815.778	845.778	835.778	61759	124.778	133.778	125.778									61759	908.778	927.778	855.778	61759	224.778	197.778	164.778	64038.7	1040.9	1006.9	725.9	64038.7	500.9	432.9	363.9			61658	2192.67	2260.67	2099.67	61658	1850.67	2107.67
	62313.9	2183.78	2250.78	2091.78	62313.9	1860.78	2121.78	1688.78	62416	808	838	829	62416	125	133	126									62416	899	919	847	62416	226	197	162	64720	1048.1	1013.1	720.1	64720	504.1	436.1	370.1			62313.9	2183.78	2250.78	2091.78	62313.9	1860.78	2121.78
	62969.8	2172.89	2238.89	2085.89	62969.8	1867.89	2121.89	1681.89	63073	801.556	833.556	822.556	63073	125.556	132.556	124.556									63073	891.556	910.556	839.556	63073	225.556	196.556	162.556	65401.2	1042.9	1004.9	711.9	65401.2	506.9	437.9	368.9			62969.8	2172.89	2238.89	2085.89	62969.8	1867.89	2121.89
	63625.7	2171	2235	2087	63625.7	1868	2123	1680	63730	794.111	825.111	813.111	63730	123.111	133.111	124.111									63730	880.111	903.111	830.111	63730	224.111	197.111	161.111	66082.5	1047.8	1000.8	711.8	66082.5	511.8	441.8	372.8			63625.7	2171	2235	2087	63625.7	1868	2123
	64281.6	2159	2227	2075	64281.6	1859	2126	1685	64387	787.333	816.333	805.333	64387	124.333	132.333	124.333									64387	875.333	894.333	820.333	64387	223.333	195.333	162.333	66763.7	1045.7	1008.7	711.7	66763.7	514.7	441.7	373.7			64281.6	2159	2227	2075	64281.6	1859	2126
	64937.5	2144.89	2212.89	2059.89	64937.5	1859.89	2131.89	1684.89	65044.7	778.889	809.889	799.889	65044.7	123.889	132.889	124.889									65044.7	864.889	885.889	812.889	65044.7	221.889	194.889	162.889	67444.9	1052.7	1004.7	700.7	67444.9	517.7	441.7	374.7			64937.5	2144.89	2212.89	2059.89	64937.5	1859.89	2131.89
	65593.4	2134.56	2208.56	2050.56	65593.4	1866.56	2124.56	1677.56	65701.7	773	801	793	65701.7	123	133	125									65701.7	855	880	805	65701.7	222	195	158	68126.2	1053.2	1002.2	692.2	68126.2	520.2	442.2	373.2			65593.4	2134.56	2208.56	2050.56	65593.4	1866.56	2124.56
									66358.7	764.444	794.444	783.444	66358.7	122.444	130.444	124.444									66358.7	843.444	868.444	796.444	66358.7	222.444	194.444	159.444	68807.4	1062.2	1003.2	691.2	68807.4	525.2	446.2	375.2
									67015.7	755.667	785.667	774.667	67015.7	123.667	131.667	124.667									67015.7	835.667	856.667	787.667	67015.7	221.667	191.667	156.667	69488.7	1052	995	682	69488.7	525	442	374
									67672.7	751.111	780.111	771.111	67672.7	122.111	130.111	124.111									67672.7	827.111	851.111	781.111	67672.7	222.111	191.111	155.111	70169.9	1058.7	995.7	678.7	70169.9	525.7	444.7	378.7
									68329.7	740.667	771.667	761.667	68329.7	123.667	131.667	123.667									68329.7	817.667	839.667	768.667	68329.7	216.667	193.667	153.667	70851.2	1063.5	994.5	672.5	70851.2	528.5	444.5	378.5
									68986.7	736.111	765.111	756.111	68986.7	122.111	132.111	123.111									68986.7	808.111	832.111	761.111	68986.7	212.111	192.111	152.111	71532.4	1064.1	990.1	658.1	71532.4	528.1	447.1	378.1
									69643.7	732.333	760.333	750.333	69643.7	122.333	131.333	123.333									69643.7	799.333	821.333	755.333	69643.7	211.333	190.333	151.333	72213.7	1062.7	991.7	656.7	72213.7	531.7	446.7	376.7
									70300.7	723.333	752.333	742.333	70300.7	121.333	130.333	123.333									70300.7	789.333	812.333	744.333	70300.7	208.333	187.333	150.333	72894.9	1064.3	992.3	655.3	72894.9	532.3	446.3	376.3
									70957.7	716.667	744.667	736.667	70957.7	120.667	129.667	123.667									70957.7	782.667	805.667	736.667	70957.7	206.667	182.667	149.667	73576.2	1068.8	985.8	649.8	73576.2	531.8	444.8	377.8
									71614.7	708.667	738.667	728.667	71614.7	120.667	129.667	122.667									71614.7	772.667	794.667	726.667	71614.7	206.667	181.667	147.667	74257.4	1063.6	976.6	640.6	74257.4	530.6	444.6	377.6
									72271.7	701.444	727.444	720.444	72271.7	120.444	128.444	121.444									72271.7	764.444	783.444	718.444	72271.7	207.444	180.444	146.444	74938.7	1062.8	978.8	635.8	74938.7	533.8	441.8	375.8
									72928.7	694.778	724.778	713.778	72928.7	122.778	128.778	121.778									72928.7	754.778	776.778	710.778	72928.7	207.778	179.778	147.778	75620.6	1060.2	964.2	620.2	75620.6	529.2	439.2	370.2
									73585.7	686.444	716.444	703.444	73585.7	121.444	129.444	122.444									73585.7	747.444	766.444	702.444	73585.7	205.444	178.444	145.444	76301.9	1057.9	968.9	611.9	76301.9	528.9	440.9	370.9
									74242.7	677.333	705.333	697.333	74242.7	118.333	126.333	121.333									74242.7	734.333	755.333	688.333	74242.7	204.333	178.333	145.333	76983.1	1052.5	960.5	601.5	76983.1	528.5	438.5	371.5
																																	77664.4	1057.7	948.7	590.7	77664.4	527.7	438.7	369.7
																																	78345.6	1043.7	941.7	586.7	78345.6	524.7	437.7	369.7
																																	79026.9	1044.7	934.7	570.7	79026.9	522.7	433.7	366.7
																																	79708.1	1042.4	931.4	567.4	79708.1	523.4	432.4	369.4
																																	80389.4	1041.7	922.7	558.7	80389.4	517.7	429.7	365.7
																																	81070.7	1027.7	923.7	547.7	81070.7	518.7	427.7	365.7
																																	81751.9	1025.7	912.7	543.7	81751.9	517.7	422.7	362.7
																																	82433.2	1024.1	899.1	535.1	82433.2	518.1	422.1	363.1
																																	83114.4	1020.8	891.8	526.8	83114.4	513.8	419.8	355.8
																																	83795.7	1014	890	520	83795.7	513	417	352
																																	84476.9	1014.2	880.2	512.2	84476.9	509.2	414.2	348.2
																																	85158.2	1006.8	876.8	501.8	85158.2	506.8	412.8	346.8
[truncated: 53 more columns]

## Sheet: OD600
FigS10A	Time [s]	Null-Null_1	Null-Null_2	Null-Null_3	Time [s]	Sa-Null_1	Sa-Null_2	Sa-Null_3	Time [s]	Guide GFP2 coding_1	Guide GFP2 coding_2	Guide GFP2 coding_3	Time [s]	RNP GFP2 coding_1	RNP GFP2 coding_2	RNP GFP2 coding_3	Time [s]	Guide GFP2 noncoding_1	Guide GFP2 noncoding_2	Guide GFP2 noncoding_3	Time [s]	RNP GFP2 noncoding_1	RNP GFP2 noncoding_2	RNP GFP2 noncoding_3	Time [s]	Guide GFP6 coding_1	Guide GFP6 coding_2	Guide GFP6 coding_3	Time [s]	RNP GFP6 coding_1	RNP GFP6 coding_2	RNP GFP6 coding_3	Time [s]	Guide GFP6 noncoding_1	Guide GFP6 noncoding_2	Guide GFP6 noncoding_3	Time [s]	RNP GFP6 noncoding_1	RNP GFP6 noncoding_2	RNP GFP6 noncoding_3		FigS10C	Time [s]	Null-Null_1	Null-Null_2	Null-Null_3	Time [s]	dSa-Null_1	dSa-Null_2
	0	0.065675	0.064175	0.070775	0	0.0655833	0.0595833	0.0653833	0	0.0540667	0.0481667	0.0522667	0	0.0396667	0.0443667	0.0404667	0	0.0356833	0.0434833	0.0411833	0	0.0568833	0.0653833	0.0636833	0	0.0484667	0.0461667	0.0434667	0	0.0444667	0.0421667	0.0242667	0	0.02435	0.02185	0.03955	0	0.02495	0.02895	0.02145			0	0.065675	0.064175	0.070775	0	0.0655833	0.0595833
	651.3	0.08965	0.08635	0.09125	694.7	0.07265	0.06545	0.07275	657	0.0598444	0.0534444	0.0587444	657	0.0435444	0.0487444	0.0444444	671.5	0.0425	0.0483	0.0453	671.5	0.0625	0.0707	0.0698	657	0.0543444	0.0511444	0.0476444	657	0.0472444	0.0462444	0.0287444	681.2	0.02787	0.02507	0.05297	681.2	0.02887	0.03147	0.02747			651.3	0.08965	0.08635	0.09125	694.7	0.07265	0.06545
	1302.7	0.089275	0.087975	0.090875	1389.5	0.0750833	0.0695833	0.0771833	1314	0.0624222	0.0572222	0.0619222	1314	0.0474222	0.0524222	0.0482222	1343	0.0550667	0.0540667	0.0516667	1343	0.0658667	0.0748667	0.0739667	1314	0.0574222	0.0546222	0.0514222	1314	0.0502222	0.0481222	0.0328222	1362.5	0.03077	0.02677	0.05867	1362.5	0.02947	0.03247	0.02997			1302.7	0.089275	0.087975	0.090875	1389.5	0.0750833	0.0695833
	1954	0.0911	0.0915	0.0925	2084.2	0.0778333	0.0722333	0.0806333	1971	0.0678333	0.0627333	0.0671333	1971	0.0514333	0.0571333	0.0527333	2014.5	0.0682667	0.0582667	0.0561667	2014.5	0.0697667	0.0784667	0.0777667	1971	0.0623333	0.0598333	0.0562333	1971	0.0530333	0.0501333	0.0330333	2043.7	0.03281	0.02931	0.05651	2043.7	0.03101	0.03421	0.02971			1954	0.0911	0.0915	0.0925	2084.2	0.0778333	0.0722333
	2605.3	0.091225	0.092025	0.093325	2779	0.0816333	0.0760333	0.0837333	2628	0.0730667	0.0670667	0.0721667	2628	0.0560667	0.0622667	0.0569667	2686	0.0757667	0.0636667	0.0609667	2686	0.0731667	0.0824667	0.0817667	2628	0.0664667	0.0636667	0.0596667	2628	0.0559667	0.0522667	0.0352667	2725	0.03445	0.03065	0.05845	2725	0.03165	0.03575	0.03105			2605.3	0.091225	0.092025	0.093325	2779	0.0816333	0.0760333
	3256.6	0.09535	0.09655	0.09625	3473.7	0.0853083	0.0797083	0.0870083	3285	0.0795	0.0729	0.0794	3285	0.0606	0.0675	0.0618	3357.5	0.0883667	0.0672667	0.0646667	3357.5	0.0776667	0.0873667	0.0864667	3285	0.0725	0.0694	0.0651	3285	0.0593	0.0544	0.0375	3406.3	0.03764	0.03274	0.06324	3406.3	0.03314	0.03664	0.03194			3256.6	0.09535	0.09655	0.09625	3473.7	0.0853083	0.0797083
	3908	0.11	0.1088	0.1064	4168.5	0.0881917	0.0820917	0.0895917	3942	0.0854444	0.0786444	0.0855444	3942	0.0656444	0.0724444	0.0673444	4029	0.09405	0.07295	0.06975	4029	0.08205	0.09185	0.09075	3942	0.0775444	0.0753444	0.0706444	3942	0.0622444	0.0568444	0.0397444	4087.5	0.04066	0.03506	0.06736	4087.5	0.03596	0.03906	0.03426			3908	0.11	0.1088	0.1064	4168.5	0.0881917	0.0820917
	4559.3	0.11385	0.11225	0.11155	4863.4	0.09245	0.08615	0.09275	4599	0.0920111	0.0851111	0.0923111	4599	0.0713111	0.0791111	0.0728111	4700.5	0.104933	0.0783333	0.0750333	4700.5	0.0866333	0.0964333	0.0961333	4599	0.0843111	0.0821111	0.0767111	4599	0.0671111	0.0600111	0.0427111	4768.8	0.04357	0.03607	0.07017	4768.8	0.03737	0.04067	0.03537			4559.3	0.11385	0.11225	0.11155	4863.4	0.09245	0.08615
	5210.6	0.1134	0.1126	0.1128	5558.2	0.095475	0.088875	0.095575	5256	0.100122	0.0928222	0.100522	5256	0.0765222	0.0849222	0.0790222	5372	0.115	0.0855	0.0811	5372	0.0909	0.1011	0.1013	5256	0.0917222	0.0891222	0.0838222	5256	0.0698222	0.0618222	0.0448222	5450	0.0447	0.0371	0.0737	5450	0.0385	0.0417	0.0367			5210.6	0.1134	0.1126	0.1128	5558.2	0.095475	0.088875
	5861.9	0.126375	0.126175	0.122675	6253	0.0978083	0.0919083	0.0975083	5913	0.106711	0.0991111	0.107411	5913	0.0824111	0.0918111	0.0857111	6043.5	0.124933	0.0940333	0.0885333	6043.5	0.0966333	0.106433	0.106333	5913	0.0982111	0.0964111	0.0892111	5913	0.0743111	0.0657111	0.0488111	6131.3	0.0488	0.0388	0.079	6131.3	0.041	0.0444	0.0401			5861.9	0.126375	0.126175	0.122675	6253	0.0978083	0.0919083
	6513.3	0.12745	0.12655	0.12265	6947.8	0.101033	0.0945333	0.100033	6570	0.1155	0.1073	0.1159	6570	0.0899	0.0992	0.0928	6715	0.1394	0.103	0.097	6715	0.1008	0.1113	0.1111	6570	0.1063	0.1052	0.0982	6570	0.0785	0.0693	0.0531	6812.5	0.05154	0.04074	0.08404	6812.5	0.04344	0.04634	0.04244			6513.3	0.12745	0.12655	0.12265	6947.8	0.101033	0.0945333
	7164.6	0.140275	0.136975	0.134575	7642.6	0.105458	0.0978583	0.102758	7227	0.122989	0.114289	0.124089	7227	0.0947889	0.105689	0.0987889	7386.5	0.150283	0.112583	0.106183	7386.5	0.106183	0.116183	0.116483	7227	0.114489	0.113789	0.104889	7227	0.0813889	0.0713889	0.0546889	7493.8	0.05577	0.04397	0.09047	7493.8	0.04497	0.04767	0.04367			7164.6	0.140275	0.136975	0.134575	7642.6	0.105458	0.0978583
	7816	0.142075	0.140075	0.137275	8337.3	0.108975	0.100475	0.105275	7884	0.1326	0.1222	0.1339	7884	0.1019	0.1135	0.1062	8058	0.15985	0.12375	0.11675	8058	0.11035	0.12025	0.12125	7884	0.1234	0.1232	0.1137	7884	0.0854	0.0747	0.0572	8175	0.05692	0.04572	0.09542	8175	0.04772	0.04952	0.04652			7816	0.142075	0.140075	0.137275	8337.3	0.108975	0.100475
	8467.3	0.149925	0.150225	0.144625	9032.1	0.112017	0.104617	0.108717	8541	0.141011	0.131911	0.142811	8541	0.108611	0.120711	0.113811	8729.5	0.163017	0.134017	0.127717	8729.5	0.115717	0.124717	0.126417	8541	0.133611	0.132711	0.123311	8541	0.0897111	0.0794111	0.0605111	8856.3	0.05718	0.04788	0.09808	8856.3	0.04958	0.05088	0.04918			8467.3	0.149925	0.150225	0.144625	9032.1	0.112017	0.104617
	9118.6	0.166	0.1607	0.1565	9726.8	0.114867	0.105767	0.112467	9198	0.148256	0.139256	0.149556	9198	0.116356	0.129056	0.120456	9401	0.179483	0.150683	0.142683	9401	0.120083	0.129783	0.132083	9198	0.141256	0.140856	0.131456	9198	0.0942556	0.0852556	0.0640556	9537.5	0.05988	0.05038	0.10438	9537.5	0.05198	0.05268	0.05068			9118.6	0.166	0.1607	0.1565	9726.8	0.114867	0.105767
	9769.9	0.1784	0.173	0.1631	10421.6	0.116475	0.107375	0.112275	9855	0.160444	0.148644	0.164044	9855	0.125144	0.137844	0.129244	10072.5	0.190117	0.168917	0.158617	10072.5	0.125017	0.135917	0.138517	9855	0.153644	0.152544	0.142144	9855	0.100144	0.0880444	0.0663444	10218.8	0.0627	0.0538	0.1124	10218.8	0.0544	0.0553	0.0523			9769.9	0.1784	0.173	0.1631	10421.6	0.116475	0.107375
	10421.2	0.18075	0.18055	0.16955	11116.3	0.11925	0.11085	0.11705	10512	0.170922	0.159122	0.183122	10512	0.132522	0.146622	0.136622	10744.1	0.2014	0.1885	0.1746	10744.1	0.1302	0.14	0.1444	10512	0.166922	0.168422	0.158022	10512	0.105722	0.0915222	0.0699222	10900	0.06644	0.05684	0.12044	10900	0.05614	0.05674	0.05434			10421.2	0.18075	0.18055	0.16955	11116.3	0.11925	0.11085
	11072.6	0.188675	0.189375	0.183575	11811	0.120742	0.112442	0.118242	11169	0.185956	0.172456	0.194956	11169	0.142956	0.157556	0.146356	11415.6	0.209783	0.204783	0.190683	11415.6	0.132983	0.144483	0.149383	11169	0.184056	0.184856	0.175056	11169	0.110056	0.0958556	0.0753556	11581.3	0.0715	0.0596	0.1266	11581.3	0.0592	0.0593	0.0559			11072.6	0.188675	0.189375	0.183575	11811	0.120742	0.112442
	11723.9	0.20655	0.20365	0.20155	12505.8	0.123142	0.114342	0.122642	11826	0.197333	0.191033	0.206733	11826	0.152133	0.171733	0.156233	12087	0.2173	0.2208	0.2068	12087	0.1365	0.1472	0.1542	11826	0.194533	0.193733	0.195933	11826	0.116333	0.100833	0.0797333	12262.6	0.07533	0.06303	0.13133	12262.6	0.06133	0.06083	0.05793			11723.9	0.20655	0.20365	0.20155	12505.8	0.123142	0.114342
	12375.2	0.2142	0.2162	0.2064	13200.5	0.123808	0.115608	0.125008	12483	0.215356	0.204856	0.226656	12483	0.165256	0.188756	0.169756	12758.7	0.234833	0.246933	0.228433	12758.7	0.142333	0.154333	0.163033	12483	0.210356	0.208356	0.211356	12483	0.119656	0.103856	0.0815556	12943.8	0.08119	0.06659	0.13899	12943.8	0.06429	0.06309	0.05989			12375.2	0.2142	0.2162	0.2064	13200.5	0.123808	0.115608
	13026.5	0.239025	0.238525	0.220625	13895.3	0.128042	0.118442	0.128042	13140	0.230667	0.222567	0.238267	13140	0.181667	0.208267	0.182467	13430.3	0.246017	0.269117	0.248917	13430.3	0.147517	0.159417	0.168617	13140	0.224467	0.223667	0.220967	13140	0.122867	0.108367	0.0831667	13625.1	0.08681	0.07161	0.14421	13625.1	0.06691	0.06471	0.06081			13026.5	0.239025	0.238525	0.220625	13895.3	0.128042	0.118442
	13677.9	0.255175	0.255575	0.245475	14590	0.130117	0.119717	0.130317	13797	0.250067	0.241767	0.255867	13797	0.200367	0.233667	0.204267	14101.8	0.25695	0.28665	0.26855	14101.8	0.15215	0.16555	0.17535	13797	0.244967	0.259967	0.249767	13797	0.127767	0.113267	0.0830667	14306.3	0.0885	0.0745	0.1403	14306.3	0.0691	0.0675	0.0627			13677.9	0.255175	0.255575	0.245475	14590	0.130117	0.119717
	14329.2	0.275175	0.276775	0.263575	15284.9	0.133142	0.123142	0.133442	14454	0.264622	0.255822	0.271422	14454	0.219522	0.245222	0.223722	14773.4	0.268383	0.304083	0.285683	14773.4	0.158283	0.169783	0.180283	14454	0.263822	0.275622	0.262422	14454	0.131822	0.117222	0.0865222	14987.6	0.09637	0.07947	0.14307	14987.6	0.06977	0.06847	0.06377			14329.2	0.275175	0.276775	0.263575	15284.9	0.133142	0.123142
	14980.5	0.30425	0.30085	0.28045	15979.6	0.138342	0.126642	0.137442	15111	0.280078	0.266278	0.284578	15111	0.230878	0.247378	0.237978	15444.9	0.279967	0.322567	0.302467	15444.9	0.162367	0.173767	0.187967	15111	0.274178	0.289678	0.272278	15111	0.136378	0.119478	0.0892778	15668.8	0.10508	0.08558	0.15198	15668.8	0.07508	0.07268	0.06708			14980.5	0.30425	0.30085	0.28045	15979.6	0.138342	0.126642
	15631.9	0.3263	0.3251	0.3077	16674.4	0.138775	0.127475	0.137675	15768	0.283544	0.279944	0.293544	15768	0.243344	0.255744	0.250944	16116.5	0.292717	0.340017	0.321317	16116.5	0.169517	0.179017	0.193917	15768	0.286244	0.304044	0.289644	15768	0.141544	0.122944	0.0944444	16350.1	0.1129	0.0906	0.1568	16350.1	0.0776	0.0747	0.069			15631.9	0.3263	0.3251	0.3077	16674.4	0.138775	0.127475
	16283.2	0.3423	0.3409	0.3176	17369.1	0.140833	0.128933	0.140033	16425.1	0.289267	0.296367	0.306967	16425.1	0.252067	0.264367	0.263167	16788	0.30375	0.35905	0.33655	16788	0.17495	0.18585	0.20325	16425.1	0.296567	0.320867	0.307167	16425.1	0.145767	0.128067	0.0993667	17031.3	0.12118	0.09738	0.16148	17031.3	0.08048	0.07728	0.07178			16283.2	0.3423	0.3409	0.3176	17369.1	0.140833	0.128933
	16934.5	0.36405	0.36465	0.34175	18063.9	0.1435	0.1302	0.1417	17082.1	0.286989	0.298389	0.308489	17082.1	0.257489	0.274589	0.270689	17459.5	0.318133	0.378433	0.353933	17459.5	0.177133	0.186033	0.207633	17082.1	0.309789	0.339089	0.326889	17082.1	0.151289	0.133189	0.103589	17712.6	0.12643	0.10183	0.16803	17712.6	0.08303	0.07993	0.07433			16934.5	0.36405	0.36465	0.34175	18063.9	0.1435	0.1302
	17585.8	0.387375	0.383975	0.360075	18758.6	0.146117	0.133717	0.144817	17739.1	0.289289	0.303089	0.317589	17739.1	0.263189	0.279289	0.277189	18131	0.328867	0.389067	0.366467	18131	0.183867	0.193267	0.217067	17739.1	0.319789	0.351489	0.337689	17739.1	0.154989	0.136689	0.106689	18393.8	0.13652	0.10822	0.17772	18393.8	0.08702	0.08412	0.07712			17585.8	0.387375	0.383975	0.360075	18758.6	0.146117	0.133717
	18237.2	0.40505	0.40535	0.38115	19453.4	0.150492	0.138492	0.146892	18396.1	0.286044	0.300944	0.321244	18396.1	0.262744	0.281144	0.287244	18802.5	0.338967	0.397067	0.380467	18802.5	0.189767	0.200267	0.227667	18396.1	0.324044	0.359244	0.341344	18396.1	0.159544	0.141044	0.110644	19075.1	0.14694	0.11384	0.18874	19075.1	0.08954	0.08554	0.08004			18237.2	0.40505	0.40535	0.38115	19453.4	0.150492	0.138492
	18888.5	0.4235	0.4215	0.3925	20148.1	0.153383	0.139983	0.147383	19053.1	0.283189	0.307689	0.329789	19053.1	0.260889	0.278089	0.294389	19474	0.349017	0.406417	0.390717	19474	0.193017	0.200017	0.227817	19053.1	0.336689	0.373189	0.360289	19053.1	0.164189	0.144689	0.112889	19756.3	0.15385	0.12115	0.19895	19756.3	0.09045	0.08825	0.08175			18888.5	0.4235	0.4215	0.3925	20148.1	0.153383	0.139983
	19539.8	0.435625	0.439525	0.414225	20842.9	0.156792	0.142692	0.152192	19710.1	0.286989	0.313689	0.337789	19710.1	0.262489	0.281989	0.303989	20145.5	0.359367	0.412867	0.401367	20145.5	0.198767	0.204367	0.235267	19710.1	0.344289	0.374489	0.362689	19710.1	0.168489	0.148789	0.116089	20437.5	0.16257	0.12467	0.20887	20437.5	0.09117	0.09177	0.08487			19539.8	0.435625	0.439525	0.414225	20842.9	0.156792	0.142692
	20191.1	0.462975	0.460875	0.431775	21537.6	0.159883	0.145083	0.157183	20367.1	0.293589	0.322689	0.344989	20367.1	0.268189	0.283589	0.308289	20817	0.371983	0.431083	0.419283	20817	0.203983	0.209883	0.242883	20367.1	0.350289	0.381189	0.373389	20367.1	0.174489	0.152789	0.119189	21118.8	0.18088	0.13498	0.21808	21118.8	0.09628	0.09538	0.08828			20191.1	0.462975	0.460875	0.431775	21537.6	0.159883	0.145083
	20842.5	0.47335	0.47215	0.44095	22232.4	0.162933	0.147433	0.157333	21024.1	0.297867	0.320567	0.350967	21024.1	0.273567	0.287467	0.311267	21488.5	0.38015	0.44175	0.43975	21488.5	0.20605	0.21025	0.24205	21024.1	0.358567	0.388067	0.376267	21024.1	0.176867	0.154867	0.121567	21800	0.19402	0.14372	0.22102	21800	0.09832	0.09682	0.08912			20842.5	0.47335	0.47215	0.44095	22232.4	0.162933	0.147433
	21493.8	0.481	0.4867	0.4566	22927.1	0.165092	0.149792	0.159592	21681.1	0.306522	0.332222	0.359722	21681.1	0.283022	0.296822	0.323522	22160	0.3895	0.4534	0.4583	22160	0.2086	0.2121	0.2433	21681.1	0.370622	0.398222	0.387622	21681.1	0.183622	0.160522	0.127022	22481.3	0.20987	0.15467	0.23117	22481.3	0.10017	0.09987	0.09207			21493.8	0.481	0.4867	0.4566	22927.1	0.165092	0.149792
	22145.1	0.499625	0.500525	0.469525	23621.9	0.167308	0.152608	0.161508	22338.1	0.310789	0.338589	0.363489	22338.1	0.289689	0.301889	0.324889	22831.5	0.395883	0.457783	0.477683	22831.5	0.214383	0.216783	0.249683	22338.1	0.378589	0.407589	0.390689	22338.1	0.187689	0.165089	0.130689	23162.6	0.21694	0.16614	0.24184	23162.6	0.10244	0.10344	0.09424			22145.1	0.499625	0.500525	0.469525	23621.9	0.167308	0.152608
	22796.4	0.50465	0.50765	0.47825	24316.7	0.170258	0.155458	0.165358	22995.1	0.315933	0.339133	0.372333	22995.1	0.294933	0.307933	0.328033	23503	0.4073	0.4818	0.5027	23503	0.2183	0.2202	0.2532	22995.1	0.385233	0.422633	0.398733	22995.1	0.192433	0.169133	0.134033	23843.8	0.22832	0.17992	0.25102	23843.8	0.10552	0.10792	0.09732			22796.4	0.50465	0.50765	0.47825	24316.7	0.170258	0.155458
	23447.8	0.514325	0.517125	0.484225	25011.4	0.172858	0.158258	0.168158	23652.1	0.321222	0.340022	0.379722	23652.1	0.301522	0.314222	0.331222	24174.5	0.411117	0.470517	0.518617	24174.5	0.222917	0.223117	0.258117	23652.1	0.392522	0.430422	0.404022	23652.1	0.195822	0.173422	0.138122	24525	0.23246	0.18896	0.25726	24525	0.10616	0.11076	0.09936			23447.8	0.514325	0.517125	0.484225	25011.4	0.172858	0.158258
	24099.1	0.524875	0.521775	0.486875	25706.2	0.175108	0.161908	0.169208	24309.1	0.322333	0.313033	0.371633	24309.1	0.305533	0.318433	0.319733	24846	0.415967	0.472367	0.536167	24846	0.224467	0.223367	0.257067	24309.1	0.392333	0.430233	0.403533	24309.1	0.198933	0.176533	0.141033	25206.3	0.25144	0.20534	0.26594	25206.3	0.11004	0.11334	0.10164			24099.1	0.524875	0.521775	0.486875	25706.2	0.175108	0.161908
	24750.4	0.53225	0.53035	0.49395	26400.9	0.1786	0.1653	0.1729	24966.1	0.328144	0.319844	0.373544	24966.1	0.312444	0.324544	0.313644	25517.5	0.424217	0.482717	0.559617	25517.5	0.230717	0.229717	0.265017	24966.1	0.401044	0.436344	0.407544	24966.1	0.202144	0.181444	0.144744	25887.6	0.25858	0.20678	0.26658	25887.6	0.11438	0.11808	0.10448			24750.4	0.53225	0.53035	0.49395	26400.9	0.1786	0.1653
	25401.7	0.53865	0.53525	0.49525	27095.7	0.181592	0.168392	0.175492	25623.8	0.331522	0.322922	0.356422	25623.8	0.317422	0.330022	0.317722	26189	0.428333	0.474133	0.575933	26189	0.229733	0.227333	0.260833	25623.8	0.403222	0.437122	0.407422	25623.8	0.206422	0.184622	0.148422	26568.8	0.2668	0.2091	0.2664	26568.8	0.1158	0.1182	0.1052			25401.7	0.53865	0.53525	0.49525	27095.7	0.181592	0.168392
	26053	0.5432	0.5356	0.4878	27790.4	0.1842	0.1718	0.1771	26280.9	0.336133	0.326833	0.334133	26280.9	0.321433	0.334633	0.322633	26860.5	0.4322	0.47	0.5931	26860.5	0.2337	0.2309	0.264	26280.9	0.402333	0.431933	0.403033	26280.9	0.209433	0.188733	0.152233	27250.1	0.27272	0.20722	0.27072	27250.1	0.12002	0.12112	0.10782			26053	0.5432	0.5356	0.4878	27790.4	0.1842	0.1718
	26704.4	0.544925	0.530325	0.474325	28485.2	0.185608	0.175108	0.178608	26937.9	0.341411	0.331511	0.339211	26937.9	0.328911	0.340811	0.329711	27532	0.437983	0.456583	0.597783	27532	0.233983	0.231183	0.267383	26937.9	0.394211	0.434111	0.395211	26937.9	0.213611	0.192911	0.156311	27931.3	0.28973	0.22443	0.27253	27931.3	0.12493	0.12673	0.11133			26704.4	0.544925	0.530325	0.474325	28485.2	0.185608	0.175108
	27355.7	0.54835	0.52965	0.46655	29179.9	0.187783	0.176283	0.180183	27594.9	0.344344	0.334644	0.341444	27594.9	0.331744	0.344844	0.333344	28203.5	0.44415	0.45145	0.60875	28203.5	0.23545	0.23195	0.26945	27594.9	0.358544	0.432644	0.381144	27594.9	0.216744	0.197144	0.160144	28612.6	0.30946	0.23156	0.27296	28612.6	0.12756	0.12776	0.11256			27355.7	0.54835	0.52965	0.46655	29179.9	0.187783	0.176283
	28007	0.54535	0.52555	0.44925	29874.6	0.187908	0.177708	0.182808	28251.9	0.350367	0.341567	0.348367	28251.9	0.337467	0.351167	0.340167	28875.1	0.4461	0.4475	0.6145	28875.1	0.2386	0.233	0.2706	28251.9	0.366267	0.438467	0.361767	28251.9	0.220767	0.201267	0.164667	29293.8	0.32846	0.24946	0.27546	29293.8	0.12956	0.13166	0.11446			28007	0.54535	0.52555	0.44925	29874.6	0.187908	0.177708
	28658.3	0.537	0.5108	0.4215	30569.4	0.192492	0.183392	0.185092	28908.9	0.353744	0.346544	0.352144	28908.9	0.344244	0.356944	0.346344	29546.5	0.4535	0.4489	0.6231	29546.5	0.2404	0.2348	0.2738	28908.9	0.372644	0.443344	0.368544	28908.9	0.224944	0.206044	0.168444	29975.1	0.34802	0.26292	0.27982	29975.1	0.13342	0.13542	0.11742			28658.3	0.537	0.5108	0.4215	30569.4	0.192492	0.183392
	29309.7	0.5228	0.489	0.4003	31264.2	0.194633	0.185833	0.189133	29565.9	0.357689	0.349289	0.354589	29565.9	0.346789	0.358589	0.349289	30218	0.452017	0.454217	0.622817	30218	0.241717	0.234617	0.273217	29565.9	0.374589	0.437989	0.370189	29565.9	0.229589	0.208689	0.173189	30656.3	0.36099	0.26839	0.28429	30656.3	0.13619	0.13809	0.11819			29309.7	0.5228	0.489	0.4003	31264.2	0.194633	0.185833
	29961	0.514175	0.465575	0.401975	31958.9	0.198083	0.189883	0.192483	30222.9	0.360044	0.352144	0.356344	30222.9	0.350744	0.362744	0.352844	30890.2	0.454967	0.458867	0.628267	30890.2	0.242867	0.236167	0.273567	30222.9	0.377244	0.429144	0.372844	30222.9	0.230744	0.212344	0.176544	31337.6	0.37735	0.27745	0.28175	31337.6	0.14125	0.14085	0.11945			29961	0.514175	0.465575	0.401975	31958.9	0.198083	0.189883
	30612.3	0.502425	0.449425	0.397925	32653.6	0.197067	0.191067	0.190767	30879.9	0.361789	0.354189	0.359689	30879.9	0.353689	0.365789	0.356489	31561.7	0.456633	0.467433	0.634833	31561.7	0.244233	0.236733	0.276133	30879.9	0.379289	0.405789	0.373889	30879.9	0.233789	0.214989	0.179589	32018.8	0.38044	0.27934	0.27304	32018.8	0.14354	0.14454	0.12194			30612.3	0.502425	0.449425	0.397925	32653.6	0.197067	0.191067
	31263.6	0.476775	0.423675	0.337175	33348.4	0.201533	0.196433	0.197033	31536.9	0.365056	0.357256	0.363256	31536.9	0.357956	0.370856	0.360256	32233.2	0.458717	0.480117	0.635317	32233.2	0.245317	0.238417	0.275617	31536.9	0.382556	0.382856	0.377056	31536.9	0.236856	0.218856	0.182956	32700.1	0.39707	0.28397	0.27957	32700.1	0.14867	0.14677	0.12357			31263.6	0.476775	0.423675	0.337175	33348.4	0.201533	0.196433
	31915	0.4531	0.404	0.3409	34043.1	0.204192	0.199792	0.198292	32193.9	0.368489	0.360689	0.366889	32193.9	0.362889	0.376889	0.365589	32904.7	0.4627	0.4958	0.6446	32904.7	0.2436	0.2361	0.2726	32193.9	0.385889	0.387689	0.380889	32193.9	0.241089	0.222389	0.186989	33381.3	0.39896	0.28906	0.28966	33381.3	0.15026	0.15076	0.12656			31915	0.4531	0.404	0.3409	34043.1	0.204192	0.199792
	32566.3	0.442375	0.400375	0.343875	34737.9	0.206692	0.205092	0.203092	32850.9	0.370944	0.364744	0.369844	32850.9	0.366744	0.380944	0.369544	33576.4	0.46435	0.51615	0.65205	33576.4	0.24925	0.23935	0.27685	32850.9	0.390544	0.391144	0.384044	32850.9	0.244644	0.226144	0.190844	34062.6	0.40574	0.28924	0.29334	34062.6	0.15254	0.15264	0.12644			32566.3	0.442375	0.400375	0.343875	34737.9	0.206692	0.205092
	33217.6	0.42445	0.35035	0.34445	35432.6	0.207425	0.206525	0.204125	33507.9	0.374478	0.366878	0.372678	33507.9	0.370278	0.382478	0.371378	34247.8	0.465967	0.537567	0.662867	34247.8	0.247167	0.237567	0.273067	33507.9	0.392178	0.392578	0.384978	33507.9	0.247378	0.228478	0.193378	34744.5	0.40904	0.27774	0.29254	34744.5	0.15694	0.15624	0.12974			33217.6	0.42445	0.35035	0.34445	35432.6	0.207425	0.206525
	33868.9	0.393175	0.349075	0.346075	36127.4	0.21005	0.20955	0.20945	34164.9	0.374389	0.367289	0.372889	34164.9	0.374389	0.387589	0.374989	34919.4	0.46065	0.54615	0.64865	34919.4	0.24195	0.23145	0.26475	34164.9	0.394089	0.393889	0.387589	34164.9	0.248089	0.231689	0.195889	35425.8	0.41479	0.28509	0.29569	35425.8	0.16339	0.16099	0.13259			33868.9	0.393175	0.349075	0.346075	36127.4	0.21005	0.20955
	34520.3	0.36005	0.35095	0.34735	36822.1	0.210467	0.210367	0.211167	34821.9	0.379478	0.374078	0.378778	34821.9	0.377578	0.392978	0.379578	35590.8	0.463917	0.568117	0.671117	35590.8	0.245017	0.233717	0.268717	34821.9	0.399878	0.400978	0.392478	34821.9	0.253578	0.234378	0.199678	36107.1	0.43684	0.29204	0.30064	36107.1	0.16694	0.16324	0.13454			34520.3	0.36005	0.35095	0.34735	36822.1	0.210467	0.210367
	35171.6	0.361825	0.353125	0.349025	37516.9	0.213517	0.215317	0.213317	35478.9	0.3809	0.375	0.3802	35478.9	0.3846	0.3971	0.3853	36262.3	0.47355	0.60355	0.70145	36262.3	0.24915	0.23835	0.27205	35478.9	0.401	0.4018	0.3935	35478.9	0.2568	0.2383	0.2033	36788.3	0.41312	0.28882	0.29452	36788.3	0.16612	0.16322	0.13382			35171.6	0.361825	0.353125	0.349025	37516.9	0.213517	0.215317
	35822.9	0.3619	0.3523	0.349	38211.6	0.214933	0.218833	0.215133	36135.9	0.383967	0.378167	0.383267	36135.9	0.387467	0.399167	0.388867	36933.8	0.471433	0.618433	0.711333	36933.8	0.248533	0.238133	0.268233	36135.9	0.403067	0.405767	0.395467	36135.9	0.258467	0.241467	0.204967	37469.6	0.43195	0.29885	0.30135	37469.6	0.17045	0.16755	0.13785			35822.9	0.3619	0.3523	0.349	38211.6	0.214933	0.218833
	36475	0.362975	0.353175	0.349975	38906.4	0.218142	0.223142	0.221242	36792.9	0.386756	0.381056	0.386256	36792.9	0.390756	0.402256	0.392556	37605.3	0.470817	0.633117	0.707217	37605.3	0.250317	0.238617	0.269517	36792.9	0.407156	0.409656	0.400756	36792.9	0.264556	0.244356	0.207956	38150.8	0.43504	0.30814	0.30224	38150.8	0.17634	0.17254	0.14104			36475	0.362975	0.353175	0.349975	38906.4	0.218142	0.223142
	37126.3	0.364225	0.353825	0.351325	39601.8	0.217942	0.225642	0.222242	37449.9	0.386144	0.381844	0.386544	37449.9	0.391844	0.402644	0.394344	38276.8	0.474617	0.687117	0.707317	38276.8	0.249217	0.236017	0.265617	37449.9	0.406844	0.408744	0.399544	37449.9	0.264044	0.244444	0.209044	38832.1	0.43731	0.31351	0.29341	38832.1	0.18091	0.17521	0.14321			37126.3	0.364225	0.353825	0.351325	39601.8	0.217942	0.225642
	37777.6	0.364975	0.354075	0.350675	40296.6	0.22035	0.22895	0.22485	38106.9	0.387344	0.381744	0.386844	38106.9	0.393144	0.402544	0.394644	38948.3	0.475183	0.718283	0.711983	38948.3	0.249583	0.236783	0.263183	38106.9	0.406544	0.409144	0.400044	38106.9	0.266544	0.245544	0.208844	39513.3	0.43232	0.31082	0.29502	39513.3	0.18192	0.17642	0.14462			37777.6	0.364975	0.354075	0.350675	40296.6	0.22035	0.22895
	38428.9	0.364375	0.354375	0.351175	40991.3	0.221358	0.232458	0.226758	38763.9	0.387844	0.382044	0.388144	38763.9	0.396644	0.405544	0.399244	39619.8	0.46635	0.73765	0.75955	39619.8	0.25135	0.23855	0.26395	38763.9	0.408144	0.410144	0.401744	38763.9	0.268844	0.247744	0.212144	40194.5	0.42691	0.31361	0.29131	40194.5	0.18131	0.17731	0.14441			38428.9	0.364375	0.354375	0.351175	40991.3	0.221358	0.232458
	39080.2	0.367275	0.356075	0.353275	41686.1	0.221308	0.233908	0.227308	39420.9	0.393756	0.389156	0.394156	39420.9	0.399856	0.409456	0.403456	40291.3	0.4664	0.7571	0.7976	40291.3	0.2492	0.2368	0.2599	39420.9	0.413456	0.416456	0.406656	39420.9	0.270856	0.248756	0.211956	40875.8	0.41124	0.31604	0.29324	40875.8	0.18474	0.18074	0.14914			39080.2	0.367275	0.356075	0.353275	41686.1	0.221308	0.233908
	39731.6	0.36635	0.35565	0.35295	42380.8	0.222867	0.236567	0.228167	40077.9	0.392867	0.388567	0.394067	40077.9	0.402767	0.412067	0.407467	40962.8	0.46695	0.77145	0.81105	40962.8	0.25135	0.23795	0.26105	40077.9	0.412367	0.416967	0.406767	40077.9	0.274267	0.251367	0.214867	41557.1	0.3959	0.322	0.2888	41557.1	0.1881	0.1823	0.1512			39731.6	0.36635	0.35565	0.35295	42380.8	0.222867	0.236567
	40382.9	0.367475	0.356775	0.353475	43075.5	0.224933	0.240033	0.231033	40734.9	0.397444	0.392544	0.397344	40734.9	0.402944	0.412644	0.407744	41634.3	0.452617	0.771117	0.819917	41634.3	0.251417	0.238417	0.256517	40734.9	0.415344	0.419044	0.408644	40734.9	0.276044	0.253244	0.216944	42238.8	0.41752	0.33092	0.28982	42238.8	0.19312	0.18622	0.15392			40382.9	0.367475	0.356775	0.353475	43075.5	0.224933	0.240033
	41034.2	0.3701	0.3586	0.3561	43770.3	0.224192	0.242092	0.232792	41391.9	0.396778	0.392078	0.396978	41391.9	0.408678	0.417378	0.413378	42305.8	0.452233	0.791333	0.833133	42305.8	0.252133	0.238233	0.251833	41391.9	0.414378	0.418578	0.408978	41391.9	0.279078	0.255378	0.217778	42920.1	0.41377	0.32927	0.28797	42920.1	0.19447	0.18707	0.15487			41034.2	0.3701	0.3586	0.3561	43770.3	0.224192	0.242092
	41685.5	0.367475	0.357075	0.353375	44465	0.22405	0.24245	0.23315	42048.9	0.398989	0.394689	0.399489	42048.9	0.409589	0.418189	0.414289	42977.3	0.460617	0.803617	0.843617	42977.3	0.251917	0.237817	0.246617	42048.9	0.416889	0.421889	0.410189	42048.9	0.280289	0.257089	0.221389	43601.3	0.42412	0.33942	0.28662	43601.3	0.19962	0.18922	0.15812			41685.5	0.367475	0.357075	0.353375	44465	0.22405	0.24245
	42336.9	0.36725	0.35505	0.35105	45159.8	0.224075	0.243975	0.233775	42705.9	0.401689	0.397889	0.402389	42705.9	0.409789	0.419389	0.415689	43648.8	0.4348	0.8029	0.8516	43648.8	0.2476	0.2345	0.238	42705.9	0.419189	0.423689	0.411389	42705.9	0.279589	0.257889	0.221189	44282.5	0.42767	0.33537	0.28227	44282.5	0.20077	0.19037	0.15897			42336.9	0.36725	0.35505	0.35105	45159.8	0.224075	0.243975
	42988.2	0.36795	0.35505	0.35205	45854.5	0.226617	0.248117	0.238417	43362.9	0.400733	0.398233	0.403433	43362.9	0.412933	0.421433	0.417733	44320.3	0.424267	0.822167	0.858967	44320.3	0.249067	0.234267	0.238867	43362.9	0.420233	0.425233	0.412033	43362.9	0.281633	0.260233	0.223833	44963.8	0.4269	0.345	0.2827	44963.8	0.2045	0.1953	0.1623			42988.2	0.36795	0.35505	0.35205	45854.5	0.226617	0.248117
	43639.5	0.36765	0.35435	0.35145	46549.3	0.228292	0.252592	0.239792	44019.9	0.404144	0.400644	0.406244	44019.9	0.416444	0.423544	0.420744	44991.8	0.374117	0.825017	0.861117	44991.8	0.247717	0.233517	0.239017	44019.9	0.421344	0.427644	0.414444	44019.9	0.284544	0.265444	0.227644	45645	0.42692	0.34422	0.28102	45645	0.20722	0.19632	0.16382			43639.5	0.36765	0.35435	0.35145	46549.3	0.228292	0.252592
	44290.8	0.370775	0.357475	0.353975	47244	0.2258	0.2493	0.2373	44676.9	0.4037	0.4008	0.4078	44676.9	0.4175	0.424	0.4214	45663.3	0.320383	0.833683	0.864783	45663.3	0.247783	0.233783	0.237683	44676.9	0.4218	0.4291	0.4159	44676.9	0.2859	0.2674	0.2287	46326.3	0.42501	0.34381	0.27991	46326.3	0.20721	0.19581	0.16371			44290.8	0.370775	0.357475	0.353975	47244	0.2258	0.2493
	44942.1	0.369725	0.356225	0.353325	47938.8	0.22905	0.25465	0.24205	45333.9	0.406444	0.403044	0.408944	45333.9	0.419644	0.425644	0.423244	46334.8	0.380733	0.838533	0.870333	46334.8	0.248333	0.233733	0.239533	45333.9	0.423044	0.428644	0.415344	45333.9	0.287144	0.267844	0.229944	47007.5	0.42386	0.34736	0.28006	47007.5	0.21016	0.19816	0.16526			44942.1	0.369725	0.356225	0.353325	47938.8	0.22905	0.25465
	45593.5	0.36645	0.35395	0.35035	48633.6	0.228133	0.255733	0.242133	45990.9	0.408878	0.406478	0.411378	45990.9	0.420878	0.427278	0.424878	47006.3	0.407317	0.840917	0.873117	47006.3	0.246717	0.231617	0.233117	45990.9	0.425078	0.431978	0.418378	45990.9	0.287278	0.267778	0.228478	47688.8	0.44094	0.35184	0.28204	47688.8	0.21324	0.19994	0.16754			45593.5	0.36645	0.35395	0.35035	48633.6	0.228133	0.255733
	46244.8	0.3652	0.3512	0.3478	49328.3	0.226817	0.254717	0.241317	46647.9	0.406789	0.403389	0.409889	46647.9	0.422289	0.428189	0.426289	47677.8	0.426717	0.845017	0.881517	47677.8	0.246117	0.232217	0.232417	46647.9	0.421989	0.426789	0.413789	46647.9	0.289089	0.268889	0.228989	48370	0.43917	0.35297	0.28317	48370	0.21657	0.20317	0.16997			46244.8	0.3652	0.3512	0.3478	49328.3	0.226817	0.254717
	46896.1	0.364475	0.350675	0.347475	50023.1	0.226558	0.256758	0.242158	47304.9	0.408289	0.405889	0.411089	47304.9	0.422189	0.428489	0.427789	48349.3	0.4107	0.8488	0.8894	48349.3	0.2455	0.2314	0.232	47304.9	0.422189	0.428389	0.414489	47304.9	0.289589	0.270089	0.230189	49051.3	0.44861	0.35561	0.28481	49051.3	0.21701	0.20261	0.16851			46896.1	0.364475	0.350675	0.347475	50023.1	0.226558	0.256758
	47547.4	0.3656	0.352	0.347	50717.8	0.22905	0.25935	0.24105	47961.9	0.407544	0.406944	0.412644	47961.9	0.423744	0.428444	0.428744	49020.8	0.400817	0.846017	0.888817	49020.8	0.243017	0.228517	0.230017	47961.9	0.422544	0.430044	0.416444	47961.9	0.291144	0.271244	0.231244	49732.5	0.45909	0.35859	0.28559	49732.5	0.22059	0.20479	0.17169			47547.4	0.3656	0.352	0.347	50717.8	0.22905	0.25935
	48198.7	0.3671	0.3522	0.3476	51412.5	0.228025	0.259725	0.242625	48618.9	0.408444	0.408444	0.413944	48618.9	0.423944	0.429244	0.430044	49692.3	0.419183	0.834783	0.885383	49692.3	0.243283	0.227783	0.229983	48618.9	0.422644	0.431344	0.417244	48618.9	0.291244	0.271944	0.230544	50413.8	0.47106	0.35956	0.28436	50413.8	0.22306	0.20646	0.17286			48198.7	0.3671	0.3522	0.3476	51412.5	0.228025	0.259725
	48850.1	0.365875	0.350775	0.346075	52107.3	0.226025	0.259425	0.241525	49275.9	0.410367	0.408267	0.413467	49275.9	0.425567	0.430767	0.431867	50363.8	0.4133	0.8195	0.8813	50363.8	0.243	0.2277	0.2295	49275.9	0.421767	0.428767	0.414167	49275.9	0.291467	0.272567	0.230667	51095	0.47465	0.36035	0.28385	51095	0.22705	0.20905	0.17385			48850.1	0.365875	0.350775	0.346075	52107.3	0.226025	0.259425
	49501.4	0.3641	0.3493	0.3454	52802.1	0.225133	0.259033	0.239833	49932.9	0.412311	0.411811	0.417211	49932.9	0.426111	0.432211	0.433211	51035.3	0.422467	0.811267	0.880067	51035.3	0.241067	0.226367	0.227467	49932.9	0.425611	0.433211	0.417611	49932.9	0.292411	0.273811	0.231111	51776.3	0.47695	0.36785	0.28245	51776.3	0.22925	0.20915	0.17555			49501.4	0.3641	0.3493	0.3454	52802.1	0.225133	0.259033
	50152.7	0.3639	0.3483	0.3437	53496.8	0.225617	0.260317	0.241217	50589.9	0.408744	0.410544	0.415944	50589.9	0.426244	0.431544	0.433644	51706.8	0.4009	0.8076	0.8822	51706.8	0.241	0.2258	0.226	50589.9	0.423144	0.431244	0.415944	50589.9	0.293344	0.274944	0.231544	52457.5	0.46122	0.36762	0.28352	52457.5	0.23202	0.21192	0.17722			50152.7	0.3639	0.3483	0.3437	53496.8	0.225617	0.260317
	50804	0.3637	0.348	0.3424	54191.5	0.226642	0.260142	0.240942	51246.9	0.409833	0.410333	0.414633	51246.9	0.427433	0.433733	0.435033	52378.3	0.369317	0.800517	0.889617	52378.3	0.241117	0.225517	0.226117	51246.9	0.420333	0.430033	0.414433	51246.9	0.294133	0.275833	0.230933	53138.8	0.44347	0.37217	0.28077	53138.8	0.23297	0.21257	0.17837			50804	0.3637	0.348	0.3424	54191.5	0.226642	0.260142
	51455.4	0.361025	0.345325	0.340625	54886.3	0.224425	0.259625	0.240425	51903.9	0.410044	0.409944	0.415244	51903.9	0.428244	0.433244	0.435544	53049.9	0.33625	0.79195	0.89615	53049.9	0.23965	0.22515	0.22495	51903.9	0.419844	0.428244	0.412444	51903.9	0.294844	0.276344	0.231544	53820	0.41959	0.37279	0.26689	53820	0.23559	0.21409	0.17759			51455.4	0.361025	0.345325	0.340625	54886.3	0.224425	0.259625
	52106.7	0.36145	0.34565	0.33935	55581	0.225067	0.261967	0.240867	52560.9	0.407922	0.407022	0.412822	52560.9	0.428722	0.433522	0.435522	53721.4	0.3048	0.7875	0.8956	53721.4	0.2381	0.2232	0.2234	52560.9	0.415622	0.424722	0.408322	52560.9	0.294822	0.276422	0.230222	54501.2	0.39109	0.37489	0.27089	54501.2	0.23689	0.21379	0.17859			52106.7	0.36145	0.34565	0.33935	55581	0.225067	0.261967
	52758	0.3606	0.3444	0.3385	56275.8	0.223767	0.260567	0.240967	53217.9	0.408244	0.408444	0.412844	53217.9	0.429944	0.435244	0.436544	54392.9	0.244117	0.766917	0.893917	54392.9	0.237317	0.221717	0.221917	53217.9	0.415644	0.425344	0.408744	53217.9	0.296044	0.276744	0.230744	55182.5	0.3958	0.3784	0.2683	55182.5	0.2391	0.2163	0.1792			52758	0.3606	0.3444	0.3385	56275.8	0.223767	0.260567
	53409.3	0.360625	0.343925	0.338625	56970.5	0.223642	0.259642	0.240242	53874.9	0.408656	0.410256	0.413556	53874.9	0.427256	0.432756	0.435256	55064.4	0.247983	0.715783	0.881883	55064.4	0.235583	0.220383	0.221683	53874.9	0.417356	0.428056	0.411156	53874.9	0.295156	0.275756	0.227856	55863.7	0.39674	0.38104	0.26544	55863.7	0.23964	0.21654	0.17944			53409.3	0.360625	0.343925	0.338625	56970.5	0.223642	0.259642
	54060.6	0.359025	0.342525	0.335025	57665.3	0.222783	0.260283	0.239483	54531.9	0.406622	0.409022	0.413122	54531.9	0.429322	0.433922	0.436922	55735.9	0.243883	0.725583	0.874183	55735.9	0.234283	0.217783	0.219683	54531.9	0.415622	0.424522	0.406722	54531.9	0.295822	0.276522	0.229422	56545	0.40389	0.38659	0.26559	56545	0.24209	0.21849	0.18019			54060.6	0.359025	0.342525	0.335025	57665.3	0.222783	0.260283
	54712	0.356325	0.339625	0.332425	58360	0.224033	0.262733	0.241733	55188.9	0.406356	0.407156	0.412056	55188.9	0.428556	0.434756	0.437656	56407.4	0.2404	0.6646	0.8729	56407.4	0.2356	0.2191	0.2203	55188.9	0.414256	0.422656	0.404656	55188.9	0.295056	0.276756	0.228356	57226.3	0.40456	0.38846	0.26306	57226.3	0.24186	0.21736	0.17956			54712	0.356325	0.339625	0.332425	58360	0.224033	0.262733
					59054.7	0.2219	0.2608	0.2384	55845.9	0.407778	0.410778	0.414978	55845.9	0.427778	0.434878	0.437078	57078.9	0.240617	0.638117	0.863217	57078.9	0.232017	0.215717	0.217317	55845.9	0.417778	0.428278	0.407078	55845.9	0.295978	0.276678	0.228178	57907.5	0.40347	0.38857	0.26157	57907.5	0.24237	0.21867	0.17847							59054.7	0.2219	0.2608
					59749.5	0.222158	0.262458	0.237958	56502.9	0.406367	0.408567	0.412367	56502.9	0.430467	0.435567	0.439567	57750.4	0.238817	0.600717	0.865417	57750.4	0.231217	0.214717	0.218117	56502.9	0.415167	0.424567	0.404467	56502.9	0.297567	0.277367	0.228767	58588.7	0.405	0.3882	0.2594	58588.7	0.2443	0.2211	0.1787							59749.5	0.222158	0.262458
					60444.2	0.220867	0.262767	0.239467	57159.9	0.406878	0.409178	0.412978	57159.9	0.427778	0.435078	0.437578	58421.9	0.235183	0.583083	0.855783	58421.9	0.231283	0.214383	0.216283	57159.9	0.414478	0.425478	0.404678	57159.9	0.297278	0.276578	0.226278	59270	0.40573	0.38863	0.25823	59270	0.24513	0.22123	0.17943							60444.2	0.220867	0.262767
					61139	0.219225	0.260425	0.237325	57816.9	0.406567	0.408367	0.410967	57816.9	0.429167	0.434267	0.437667	59093.4	0.238817	0.518917	0.847617	59093.4	0.229517	0.212417	0.215517	57816.9	0.413367	0.422567	0.401267	57816.9	0.296667	0.276867	0.226567	59951.2	0.40563	0.38753	0.25463	59951.2	0.24413	0.22083	0.17803							61139	0.219225	0.260425
					61833.7	0.220242	0.262242	0.236842	58473.9	0.406389	0.408489	0.411689	58473.9	0.428889	0.434589	0.437689	59764.9	0.23635	0.47675	0.83955	59764.9	0.22885	0.21155	0.21475	58473.9	0.412089	0.421589	0.399889	58473.9	0.297289	0.276289	0.225989	60632.5	0.4121	0.3943	0.2563	60632.5	0.2463	0.2223	0.1782							61833.7	0.220242	0.262242
					62528.5	0.22025	0.26165	0.23535	59130.9	0.406044	0.407844	0.412044	59130.9	0.429444	0.436244	0.438544	60436.4	0.2484	0.4785	0.8189	60436.4	0.2273	0.2099	0.2122	59130.9	0.410644	0.420044	0.397344	59130.9	0.297344	0.277644	0.226444	61313.7	0.41072	0.39102	0.25502	61313.7	0.24792	0.22332	0.17862							62528.5	0.22025	0.26165
					63223.2	0.218892	0.261692	0.234792	59787.9	0.404822	0.407222	0.410722	59787.9	0.428522	0.434522	0.437422	61107.9	0.2463	0.475	0.7748	61107.9	0.2229	0.2051	0.2091	59787.9	0.409322	0.418722	0.394822	59787.9	0.297122	0.276722	0.224622	61995	0.418	0.3962	0.2537	61995	0.2479	0.2234	0.1777							63223.2	0.218892	0.261692
					63917.9	0.216533	0.258333	0.233233	60444.9	0.4024	0.4058	0.4088	60444.9	0.4273	0.4342	0.4373	61779.5	0.250383	0.472783	0.751983	61779.5	0.223883	0.207083	0.209083	60444.9	0.406	0.4151	0.3916	60444.9	0.2971	0.2762	0.2238	62676.2	0.41772	0.39572	0.25202	62676.2	0.24892	0.22412	0.17722							63917.9	0.216533	0.258333
					64612.7	0.216042	0.262442	0.233142	61101.9	0.398978	0.403578	0.407678	61101.9	0.428878	0.436078	0.438578									61101.9	0.403878	0.413178	0.390078	61101.9	0.297578	0.276978	0.223978	63357.5	0.42136	0.39426	0.25026	63357.5	0.24936	0.22556	0.17766							64612.7	0.216042	0.262442
					65307.4	0.216158	0.259358	0.230458	61759	0.398811	0.403311	0.406711	61759	0.427211	0.434811	0.437511									61759	0.401411	0.410411	0.386611	61759	0.296311	0.275411	0.222711	64038.7	0.416	0.3946	0.249	64038.7	0.2508	0.2243	0.175							65307.4	0.216158	0.259358
					66002.2	0.21575	0.26025	0.22875	62416	0.399578	0.402578	0.406278	62416	0.426178	0.434278	0.436578									62416	0.401778	0.411578	0.386278	62416	0.296478	0.274778	0.220978	64720	0.4212	0.3991	0.2453	64720	0.2517	0.2261	0.1778							66002.2	0.21575	0.26025
					66696.9	0.214492	0.260092	0.228192	63073	0.398389	0.402589	0.406189	63073	0.425589	0.432489	0.436289									63073	0.398689	0.409689	0.383789	63073	0.295389	0.274389	0.219789	65401.2	0.42428	0.40218	0.24738	65401.2	0.25078	0.22518	0.17738							66696.9	0.214492	0.260092
					67391.7	0.213075	0.259575	0.227575	63730	0.398922	0.404422	0.407522	63730	0.424222	0.432222	0.435622									63730	0.401222	0.410622	0.383522	63730	0.295222	0.274422	0.219322	66082.5	0.41998	0.39598	0.24788	66082.5	0.25348	0.22548	0.17628							67391.7	0.213075	0.259575
					68086.4	0.211858	0.257758	0.225358	64387	0.393211	0.398711	0.402411	64387	0.424811	0.434111	0.436311									64387	0.394111	0.403111	0.377611	64387	0.295511	0.274211	0.218911	66763.7	0.42556	0.40056	0.24716	66763.7	0.25506	0.22676	0.17666							68086.4	0.211858	0.257758
					68781.1	0.212533	0.258733	0.224733	65044.7	0.393122	0.398722	0.403622	65044.7	0.425022	0.432022	0.435622									65044.7	0.393922	0.403322	0.375822	65044.7	0.294722	0.273522	0.217622	67444.9	0.427	0.3977	0.2406	67444.9	0.2542	0.2248	0.1754							68781.1	0.212533	0.258733
					69475.9	0.209808	0.256708	0.223708	65701.7	0.393256	0.398956	0.403856	65701.7	0.423556	0.432556	0.435756									65701.7	0.393856	0.401656	0.373456	65701.7	0.294056	0.273656	0.216256	68126.2	0.43169	0.39899	0.23919	68126.2	0.25339	0.22359	0.17319							69475.9	0.209808	0.256708
					70170.6	0.207608	0.257808	0.220708	66358.7	0.391389	0.396989	0.401189	66358.7	0.422489	0.431589	0.435089									66358.7	0.390089	0.399389	0.371689	66358.7	0.294189	0.272789	0.214889	68807.4	0.42882	0.39832	0.24052	68807.4	0.25462	0.22332	0.17232							70170.6	0.207608	0.257808
					70865.4	0.208592	0.255492	0.216192	67015.7	0.389089	0.394589	0.400189	67015.7	0.424989	0.432689	0.435289									67015.7	0.386689	0.395989	0.367389	67015.7	0.293989	0.273789	0.213989	69488.7	0.42961	0.39551	0.23831	69488.7	0.25401	0.22171	0.17101							70865.4	0.208592	0.255492
					71560.1	0.208633	0.256133	0.220233	67672.7	0.388011	0.394511	0.397711	67672.7	0.421611	0.431311	0.433411									67672.7	0.383911	0.393811	0.364311	67672.7	0.292411	0.272311	0.213911	70169.9	0.43462	0.39832	0.23422	70169.9	0.25512	0.22102	0.17162							71560.1	0.208633	0.256133
									68329.7	0.386678	0.392478	0.398178	68329.7	0.421178	0.429778	0.433478									68329.7	0.383378	0.392578	0.362978	68329.7	0.294178	0.270378	0.214478	70851.2	0.43112	0.39412	0.22902	70851.2	0.25182	0.21842	0.16892
									68986.7	0.384878	0.392178	0.395978	68986.7	0.421478	0.429878	0.432978									68986.7	0.379378	0.388078	0.359578	68986.7	0.296678	0.271178	0.214278	71532.4	0.44087	0.40057	0.23307	71532.4	0.25377	0.22007	0.16947
									69643.7	0.380311	0.389011	0.393111	69643.7	0.419511	0.429011	0.431811									69643.7	0.375411	0.385211	0.355511	69643.7	0.296711	0.269711	0.211911	72213.7	0.4424	0.3988	0.2262	72213.7	0.2572	0.2206	0.169
									70300.7	0.3793	0.3863	0.3919	70300.7	0.418	0.4281	0.4313									70300.7	0.3735	0.3821	0.3528	70300.7	0.2951	0.2698	0.2098	72894.9	0.44096	0.39806	0.22386	72894.9	0.25476	0.21846	0.16756
									70957.7	0.377878	0.386278	0.390878	70957.7	0.415378	0.425378	0.428778									70957.7	0.370878	0.380278	0.349178	70957.7	0.292978	0.271278	0.206478	73576.2	0.44411	0.39001	0.22801	73576.2	0.25411	0.21701	0.16701
									71614.7	0.375111	0.382611	0.387711	71614.7	0.413611	0.422911	0.427211									71614.7	0.367011	0.377411	0.346311	71614.7	0.289011	0.271511	0.204711	74257.4	0.4443	0.3945	0.2245	74257.4	0.2522	0.215	0.1647
									72271.7	0.376667	0.382967	0.385767	72271.7	0.415867	0.425667	0.429967									72271.7	0.366267	0.374567	0.343167	72271.7	0.289667	0.271867	0.203567	74938.7	0.43855	0.39535	0.21965	74938.7	0.25325	0.21535	0.16445
									72928.7	0.371211	0.379711	0.383711	72928.7	0.414611	0.423911	0.429111									72928.7	0.362011	0.371511	0.339111	72928.7	0.287511	0.271411	0.201411	75620.6	0.4435	0.3923	0.2147	75620.6	0.2515	0.2124	0.1615
									73585.7	0.369011	0.377711	0.382211	73585.7	0.412711	0.423911	0.428611									73585.7	0.360211	0.369211	0.335011	73585.7	0.284711	0.269611	0.199811	76301.9	0.44586	0.39456	0.21676	76301.9	0.25026	0.21176	0.16146
									74242.7	0.365578	0.373778	0.378978	74242.7	0.411978	0.423478	0.426778									74242.7	0.355278	0.364178	0.330578	74242.7	0.283978	0.267278	0.197678	76983.1	0.44279	0.38869	0.20969	76983.1	0.24719	0.20919	0.15849
																																	77664.4	0.44408	0.38438	0.20268	77664.4	0.24708	0.20778	0.15818
																																	78345.6	0.43758	0.38228	0.20408	78345.6	0.24558	0.20578	0.15608
																																	79026.9	0.43856	0.37496	0.20126	79026.9	0.24156	0.20256	0.15396
																																	79708.1	0.44098	0.37858	0.19758	79708.1	0.24038	0.20038	0.15348
																																	80389.4	0.44346	0.37916	0.19446	80389.4	0.23996	0.19986	0.15336
																																	81070.7	0.43938	0.37468	0.19128	81070.7	0.23538	0.19418	0.14868
																																	81751.9	0.44044	0.37354	0.19094	81751.9	0.23564	0.19314	0.14874
																																	82433.2	0.43873	0.36603	0.18643	82433.2	0.23393	0.19023	0.14783
																																	83114.4	0.43996	0.36346	0.18396	83114.4	0.23216	0.18676	0.14536
																																	83795.7	0.43913	0.36553	0.17933	83795.7	0.22963	0.18123	0.14303
																																	84476.9	0.4378	0.3665	0.1801	84476.9	0.2262	0.1766	0.1398
																																	85158.2	0.43573	0.35753	0.17583	85158.2	0.22313	0.17113	0.13713
[truncated: 53 more columns]

## Sheet: GFP_OD600
FigS10A	Time [s]	Null-Null_1	Null-Null_2	Null-Null_3	Time [s]	Sa-Null_1	Sa-Null_2	Sa-Null_3	Time [s]	Guide GFP2 coding_1	Guide GFP2 coding_2	Guide GFP2 coding_3	Time [s]	RNP GFP2 coding_1	RNP GFP2 coding_2	RNP GFP2 coding_3	Time [s]	Guide GFP2 noncoding_1	Guide GFP2 noncoding_2	Guide GFP2 noncoding_3	Time [s]	RNP GFP2 noncoding_1	RNP GFP2 noncoding_2	RNP GFP2 noncoding_3	Time [s]	Guide GFP6 coding_1	Guide GFP6 coding_2	Guide GFP6 coding_3	Time [s]	RNP GFP6 coding_1	RNP GFP6 coding_2	RNP GFP6 coding_3	Time [s]	Guide GFP6 noncoding_1	Guide GFP6 noncoding_2	Guide GFP6 noncoding_3	Time [s]	RNP GFP6 noncoding_1	RNP GFP6 noncoding_2	RNP GFP6 noncoding_3		FigS10C	Time [s]	Null-Null_1	Null-Null_2	Null-Null_3	Time [s]	dSa-Null_1	dSa-Null_2
	0	2774.6	2374.19	2843.79	0	2710.37	2459.76	2562.83	0	1154.95	1109.57	1118.2	0	717.087	776.359	653.487	0	2685.66	2709.85	2715.5	0	2387.93	2368.09	2478.41	0	1102.71	919.374	861.452	0	819.59	1101.45	883.7	0	2743.33	2828.38	2573.96	0	2276.55	2307.43	2228.44			0	2774.6	2374.19	2843.79	0	2710.37	2459.76
	655.9	2734.29	2268.25	2824.89	655.9	2718.8	2472.92	2663.38	657	1097.29	1060.29	1049.74	657	681.296	752.223	622.5	671.5	2384.31	2532.78	2568.06	671.5	2261.33	2267.8	2340.02	657	1079.53	873.343	874.534	657	860.771	1052.38	823.348	681.2	2490.13	2449.14	1989.81	681.2	2057.5	2205.27	1943.94			655.9	2734.29	2268.25	2824.89	655.9	2718.8	2472.92
	1311.8	2612.27	2254.09	2807.6	1311.8	2621.07	2484.09	2668.75	1314	1123.18	1085.44	1083.8	1314	634.958	727.003	624.424	1343	2006.66	2358.2	2351.61	1343	2254.55	2223.95	2305.09	1314	1099.07	899.105	916.162	1314	818.584	1020.55	734.597	1362.5	2294.44	2375.79	1816.94	1362.5	2056.33	2143.52	1788.46			1311.8	2612.27	2254.09	2807.6	1311.8	2621.07	2484.09
	1967.8	2655.81	2325.87	2804.76	1967.8	2616.26	2566.99	2650.88	1971	1181	1117.61	1148.63	1971	624.325	702.061	608.934	2014.5	1745.61	2285.47	2246.29	2014.5	2224.08	2219.63	2329.62	1971	1188.95	987.929	997.827	1971	850.618	1039.45	760.175	2043.7	2252.36	2214.26	1927.09	2043.7	2060.63	2072.49	1847.86			1967.8	2655.81	2325.87	2804.76	1967.8	2616.26	2566.99
	2623.7	2753.54	2400.09	2952.51	2623.7	2666.17	2558.7	2628.89	2628	1271.29	1221.01	1231.72	2628	622.275	656.674	594.89	2686	1702.6	2167.54	2181.52	2686	2241.46	2231.2	2299.23	2628	1337.35	1129.14	1121.04	2628	819.932	992.772	734.089	2725	2203.19	2247.96	1931.57	2725	2113.74	2039.16	1832.53			2623.7	2753.54	2400.09	2952.51	2623.7	2666.17	2558.7
	3279.7	2890.79	2492.66	3057.61	3279.7	2627.14	2564.28	2637.81	3285	1351.5	1295.53	1315.42	3285	584.892	643.621	589.716	3357.5	1531.5	2130.82	2123.71	3357.5	2206.01	2178.56	2270.62	3285	1454.41	1274.42	1235.71	3285	833.802	982.435	731.852	3406.3	2112.11	2183.87	1858	3406.3	2036.81	2033.3	1862.87			3279.7	2890.79	2492.66	3057.61	3279.7	2627.14	2564.28
	3935.6	3026.32	2591.74	3244.03	3935.6	2652.35	2521.57	2637.5	3942	1469.44	1393.05	1420.96	3942	556.872	615.031	542.815	4029	1557.68	2049.35	2086.02	4029	2187.69	2139.36	2242.42	3942	1632.04	1387.7	1380.94	3942	828.276	942.142	743.64	4087.5	2046.24	2116.37	1828.98	4087.5	1979.98	1950.84	1815.53			3935.6	3026.32	2591.74	3244.03	3935.6	2652.35	2521.57
	4591.6	3132.87	2739.55	3344.65	4591.6	2622.54	2472.01	2622.59	4599	1581.93	1498.69	1555.13	4599	554.69	575.843	502.06	4700.5	1477.13	2029.79	2039.09	4700.5	2158.52	2115.45	2205.27	4599	1761.99	1553.45	1493.34	4599	783.113	909.091	715.401	4768.8	1983.02	2145.83	1815.59	4768.8	1937.38	1903.12	1820.75			4591.6	3132.87	2739.55	3344.65	4591.6	2622.54	2472.01
	5247.5	3253.27	2818.05	3435.22	5247.5	2554.38	2418.43	2544.3	5256	1690.16	1586.07	1663.53	5256	525.628	567.84	496.344	5372	1434.78	1918.13	1972.87	5372	2112.21	2087.04	2122.41	5256	1899.45	1685.58	1637.06	5256	805.22	909.418	718.889	5450	2051.45	2202.16	1814.11	5450	1966.23	1911.27	1790.19			5247.5	3253.27	2818.05	3435.22	5247.5	2554.38	2418.43
	5903.4	3367.81	2957.98	3562.86	5903.4	2581.05	2357.05	2463.74	5913	1825.28	1713	1776.15	5913	494.809	531.284	464.091	6043.5	1411.42	1864.59	1878.76	6043.5	2042.08	2023.18	2081.5	5913	2044.35	1833.58	1802.22	5913	790.969	864.051	712.497	6131.3	1956.97	2177.83	1753.16	6131.3	1890.24	1835.59	1708.23			5903.4	3367.81	2957.98	3562.86	5903.4	2581.05	2357.05
	6559.3	3501.73	3043.42	3673.38	6559.3	2512.99	2464.72	2561.65	6570	1939.39	1835.97	1915.44	6570	456.062	514.113	452.586	6715	1361.79	1755.66	1792.1	6715	2012.24	1993.11	2041.7	6570	2182.5	1977.19	1894.09	6570	777.07	836.941	659.134	6812.5	1907.26	2167.4	1728.94	6812.5	1848.53	1819.16	1656.46			6559.3	3501.73	3043.42	3673.38	6559.3	2512.99	2464.72
	7215.2	3641.68	3185.53	3829.79	7215.2	2528.98	2460.21	2522.31	7227	2103.17	1974.53	2052.29	7227	460.673	488.856	442.02	7386.5	1321.95	1693.56	1720.3	7386.5	1936.9	1933.73	1997.42	7227	2346.66	2123.82	2075.21	7227	769.966	835.798	688.744	7493.8	1866.59	2094.61	1681.22	7493.8	1870.14	1764.21	1673.92			7215.2	3641.68	3185.53	3829.79	7215.2	2528.98	2460.21
	7871.1	3719.24	3219.18	3890.37	7871.1	2508.55	2414.73	2484.54	7884	2207.98	2093.11	2141.73	7884	439.429	473.813	412.22	8058	1339.8	1617.51	1645.97	8058	1922.67	1922.38	1972.51	7884	2469.84	2230.34	2188.02	7884	746.812	800.238	660.451	8175	1918.48	2125.98	1678.89	8175	1764.46	1740.71	1638.01			7871.1	3719.24	3219.18	3890.37	7871.1	2508.55	2414.73
	8527	3763	3295.57	3934.87	8527	2460.52	2352.63	2416.35	8541	2327.63	2184.97	2263.28	8541	425.575	465.758	397.345	8729.5	1418.06	1560.75	1590.76	8729.5	1885.35	1901.64	1939.35	8541	2591.27	2352.65	2313.03	8541	738.172	833.916	631.656	8856.3	1995.45	2132.41	1703.71	8856.3	1756.76	1770.83	1588.04			8527	3763	3295.57	3934.87	8527	2460.52	2352.63
	9182.9	3921.29	3399.07	4089.59	9182.9	2447.59	2430.67	2470.55	9198	2479.95	2317.08	2391.53	9198	409.664	446.836	395.72	9401	1348.31	1473.29	1499.82	9401	1848.72	1864.65	1900.32	9198	2751.51	2510.85	2439.35	9198	728.516	817.151	634.866	9537.5	2000.67	2100.04	1684.23	9537.5	1727.59	1723.61	1594.32			9182.9	3921.29	3399.07	4089.59	9182.9	2447.59	2430.67
	9838.8	3941.82	3434.47	4178.08	9838.8	2432.94	2423.58	2431.37	9855	2517.31	2421.14	2407.21	9855	406.641	434.467	386.004	10072.5	1345.66	1384.31	1404.85	10072.5	1814.42	1816.06	1839.73	9855	2830.49	2595.24	2517.78	9855	737.823	816.507	661.531	10218.8	1984.05	2033.46	1649.47	10218.8	1735.29	1670.89	1575.53			9838.8	3941.82	3434.47	4178.08	9838.8	2432.94	2423.58
	10494.7	3999.83	3407.33	4183.78	10494.7	2477.64	2325.73	2367.78	10512	2589.87	2486.56	2379.1	10512	382.326	413.762	370.852	10744.1	1348.89	1292.66	1332.57	10744.1	1779.31	1811.9	1812.1	10512	2885.58	2610.5	2541.84	10512	744.088	793.978	624.503	10900	1976.22	2028.5	1596.65	10900	1715.35	1661.97	1588.15			10494.7	3999.83	3407.33	4183.78	10494.7	2477.64	2325.73
	11150.7	4061.4	3489.21	4288.43	11150.7	2377.61	2371.1	2398.93	11169	2602.77	2504.99	2441.58	11169	384.735	406.206	362.132	11415.6	1369.67	1256.61	1270.87	11415.6	1777.17	1808.74	1789.58	11169	2885	2634.49	2564.9	11169	717.819	740.698	636.98	11581.3	1918.88	2016.78	1605.06	11581.3	1675.68	1655.99	1559.93			11150.7	4061.4	3489.21	4288.43	11150.7	2377.61	2371.1
	11806.6	4223.16	3640.93	4438.4	11806.6	2384.06	2358.31	2380.13	11826	2666.1	2476.59	2477.16	11826	355.682	379.141	346.348	12087	1408.96	1223.58	1224.21	12087	1781.44	1814.99	1803.93	11826	2976.92	2731.13	2511.63	11826	688.634	715.151	691.193	12262.6	1920.88	1994.29	1619.58	12262.6	1641.94	1606.12	1565.68			11806.6	4223.16	3640.93	4438.4	11806.6	2384.06	2358.31
	12462.6	4296.35	3628.3	4434.05	12462.6	2406.15	2345.84	2414.97	12483	2647.82	2510.17	2449.63	12483	352.316	366.729	331.195	12758.7	1366.22	1149.43	1163.72	12758.7	1748.24	1787.26	1759.35	12483	2991.23	2770.37	2579.64	12483	703.872	705.039	689.373	12943.8	1861.07	1983.78	1597.96	12943.8	1619.23	1602.47	1537.82			12462.6	4296.35	3628.3	4434.05	12462.6	2406.15	2345.84
	13118.5	4275.43	3685.47	4463.61	13118.5	2432.83	2377.09	2353.42	13140	2675.34	2494.13	2506.06	13140	330.887	346.244	323.956	13430.3	1378.63	1122.81	1133.58	13430.3	1722.97	1795.09	1750.52	13140	3043.26	2808.25	2661.54	13140	708.989	702.348	662.659	13625.1	1837.35	1920.12	1591.43	13625.1	1606.64	1583.99	1537.58			13118.5	4275.43	3685.47	4463.61	13118.5	2432.83	2377.09
	13775.1	4347.22	3775.96	4555.45	13775.1	2422	2400.93	2285.71	13797	2671.29	2490	2520.84	13797	314.424	325.25	303.525	14101.8	1382.24	1092.51	1099.11	14101.8	1709.94	1843.35	1774.55	13797	3028.98	2642.65	2582.41	13797	704.409	688.64	650.08	14306.3	1885.88	1931.54	1724.16	14306.3	1590.45	1568.89	1513.56			13775.1	4347.22	3775.96	4555.45	13775.1	2422	2400.93
	14431	4397	3828.53	4630.39	14431	2403.57	2387.38	2289.52	14454	2717.08	2525.19	2637.96	14454	300.653	318.079	290.539	14773.4	1387.94	1093.45	1076.37	14773.4	1727.91	1858.25	1783.3	14454	3062.67	2692.09	2648.4	14454	705.496	682.464	635.675	14987.6	1795.16	1862.34	1789.33	14987.6	1619.61	1548.12	1521.09			14431	4397	3828.53	4630.39	14431	2403.57	2387.38
	15086.9	4205.99	3686.33	4395.87	15086.9	2424.77	2311.94	2237.65	15111	2845.64	2595.03	2776.04	15111	294.528	323.392	285.741	15444.9	1383.5	1089.18	1065.68	15444.9	1745.02	1762.9	1688.24	15111	3304.43	2723.72	2717.81	15111	711.26	694.69	616.055	15668.8	1750.1	1856.74	1795.63	15668.8	1557.01	1512.11	1548.9			15086.9	4205.99	3686.33	4395.87	15086.9	2424.77	2311.94
	15742.8	4323.52	3766.09	4476.35	15742.8	2428.72	2327.48	2291.04	15768	3023.63	2719.59	2893.37	15768	289.028	318.026	284.259	16116.5	1362.52	1072.99	1051.4	16116.5	1733.36	1747.51	1628.71	15768	3463.24	2786.87	2742.44	15768	708.847	702.214	617.647	16350.1	1709.48	1821.19	1811.22	16350.1	1546.39	1499.33	1536.23			15742.8	4323.52	3766.09	4476.35	15742.8	2428.72	2327.48
	16398.7	4245.23	3655.26	4114.26	16398.7	2410.41	2374.02	2246.54	16425.1	3108.24	2770.59	2867.12	16425.1	286.08	314.378	277.813	16788	1321.26	1078.77	1058.78	16788	1722.4	1685.95	1595.74	16425.1	3557.75	2820.83	2754.57	16425.1	707.371	688.01	594.879	17031.3	1671.07	1791.95	1780.41	17031.3	1534.54	1494.57	1525.49			16398.7	4245.23	3655.26	4114.26	16398.7	2410.41	2374.02
	17054.7	4375.98	3714.48	4367.03	17054.7	2368.69	2340.84	2273.15	17082.1	3250.61	2898.53	2943.02	17082.1	294.727	320.074	276.66	17459.5	1281.96	1069.76	1053.4	17459.5	1698.34	1681.6	1554.82	17082.1	3573.04	2898.62	2743.71	17082.1	713.132	689.914	597.447	17712.6	1674.44	1784.35	1849.07	17712.6	1525.95	1485.05	1502.76			17054.7	4375.98	3714.48	4367.03	17054.7	2368.69	2340.84
	17710.6	4274.18	3686.88	4618.52	17710.6	2248.79	2396.83	2323.61	17739.1	3278.15	2927.63	2910.47	17739.1	293.832	316.279	278.991	18131	1298.4	1092.36	1058.76	18131	1642.49	1619.52	1524.88	17739.1	3556.51	3045.14	2867.53	17739.1	711.879	682.816	584.253	18393.8	1665.69	1759.38	1707.18	18393.8	1510	1443.18	1431.54			17710.6	4274.18	3686.88	4618.52	17710.6	2248.79	2396.83
	18366.5	4334.45	3794.11	4184.03	18366.5	2184.08	2413.2	2364.49	18396.1	3406.23	3031.57	2961.4	18396.1	298.135	321.306	272.706	18802.5	1322.16	1103.51	1059.66	18802.5	1602.85	1583.72	1476.57	18396.1	3642.5	3135.28	3077.05	18396.1	710.356	690.09	590.48	19075.1	1614.26	1749.82	1654.13	19075.1	1509.94	1498.71	1389.31			18366.5	4334.45	3794.11	4184.03	18366.5	2184.08	2413.2
	19022.4	4534.76	4011.28	4250.73	19022.4	2221.31	2402.66	2328.56	19053.1	3532	3049.26	2963.18	19053.1	315.162	342.416	272.504	19474	1305.1	1123.23	1073.67	19474	1582.76	1602.37	1503.4	19053.1	3644.97	3146.46	3109.23	19053.1	720.038	699.585	604.331	19756.3	1609.36	1730.09	1641.62	19756.3	1532.34	1479.89	1401.83			19022.4	4534.76	4011.28	4250.73	19022.4	2221.31	2402.66
	19678.3	4628.51	3981.49	4079.33	19678.3	2156.44	2499.33	2218.4	19710.1	3597.51	3115.97	2967.67	19710.1	317.897	342.015	274.498	20145.5	1273.54	1144.84	1082.97	20145.5	1562.97	1573.97	1473.51	19710.1	3666.82	3240.27	3243.67	19710.1	720.786	695.243	624.043	20437.5	1611.61	1772.68	1642.17	20437.5	1557.53	1471.07	1402.14			19678.3	4628.51	3981.49	4079.33	19678.3	2156.44	2499.33
	20334.2	4714.92	3989.58	4131.58	20334.2	2120.33	2412.93	2246.5	20367.1	3617.3	3133.05	2994.3	20367.1	320.67	342.044	275.715	20817	1277.84	1139.76	1088.37	20817	1536.07	1554.83	1454.75	20367.1	3688.38	3258.23	3259.34	20367.1	722.109	706.858	612.473	21118.8	1520.35	1703.96	1641.6	21118.8	1516.41	1415.39	1381.97			20334.2	4714.92	3989.58	4131.58	20334.2	2120.33	2412.93
	20990.1	4614.81	4049.24	4184.01	20990.1	2095.2	2360.03	2424.84	21024.1	3674.28	3223.81	3038.59	21024.1	323.301	342.455	280.931	21488.5	1250.38	1148.46	1067.27	21488.5	1535.23	1566.39	1480.41	21024.1	3654.67	3281.51	3307.35	21024.1	737.53	713.158	620.601	21800	1480.26	1678.26	1693.06	21800	1517.49	1417.06	1416.07			20990.1	4614.81	4049.24	4184.01	20990.1	2095.2	2360.03
	21646	4649.7	4064.75	4213.27	21646	2104.24	2323.91	2442.85	21681.1	3664.04	3218.06	3061	21681.1	318.389	337.276	272.349	22160	1237.48	1166.74	1071.35	22160	1543.62	1584.16	1504.32	21681.1	3596.95	3297.43	3279.25	21681.1	735.81	710.874	622.813	22481.3	1432.79	1627.34	1681.45	22481.3	1544.37	1408.83	1397.85			21646	4649.7	4064.75	4213.27	21646	2104.24	2323.91
	22302	4635.66	4088.51	4351.16	22302	2107.66	2299.12	2457.81	22338.1	3695.26	3253.04	3109.98	22338.1	315.664	342.657	278.386	22831.5	1236.9	1198.53	1073.24	22831.5	1537.74	1576.07	1480.54	22338.1	3567.05	3293.62	3315.8	22338.1	737.627	705.344	623.193	23162.6	1455.7	1581.8	1686.24	23162.6	1520.89	1390.18	1398.56			22302	4635.66	4088.51	4351.16	22302	2107.66	2299.12
	22957.9	4621.01	4013.08	4336.73	22957.9	2152.02	2314.78	2564.92	22995.1	3676.58	3307.12	3098.18	22995.1	317.209	336.292	282.153	23503	1223.91	1171.65	1063.26	23503	1523.13	1564.49	1479.07	22995.1	3508.41	3202.67	3274.26	22995.1	740.805	712.784	623.394	23843.8	1447.09	1536.24	1690.7	23843.8	1510.61	1365.83	1381.01			22957.9	4621.01	4013.08	4336.73	22957.9	2152.02	2314.78
	23613.8	4560.97	3965.75	4229.41	23613.8	2174.82	2316.68	2668.14	23652.1	3652.02	3347.17	3084.13	23652.1	315.436	334.512	284.133	24174.5	1262.82	1250.04	1082.05	24174.5	1521.5	1560.47	1476.72	23652.1	3465.06	3166.92	3240.2	23652.1	746.142	709.892	623.441	24525	1479.39	1528.9	1733.27	24525	1543.9	1389.49	1428.14			23613.8	4560.97	3965.75	4229.41	23613.8	2174.82	2316.68
	24269.7	4570.66	4024.38	4280.31	24269.7	2257.99	2416.3	2701.65	24309.1	3664.94	3662.02	3181.45	24309.1	318.569	337.067	301.293	24846	1300.99	1285.37	1095.12	24846	1533.26	1576.63	1490.53	24309.1	3444.35	3166.5	3207.5	24309.1	755.697	721.299	640.511	25206.3	1428.57	1466.84	1741.75	25206.3	1510.36	1378.15	1389.22			24269.7	4570.66	4024.38	4280.31	24269.7	2257.99	2416.3
	24925.8	4495.38	3999.08	4237.19	24925.8	2316.69	2530.92	2781.95	24966.1	3604.44	3619.82	3185.1	24966.1	316.145	335.171	305.371	25517.5	1300.44	1281.64	1091.22	25517.5	1506.9	1548.28	1466.57	24966.1	3353.19	3111.71	3167.21	24966.1	765.679	726.271	640.976	25887.6	1445.2	1536.42	1803.21	25887.6	1509.88	1369.41	1394.53			24925.8	4495.38	3999.08	4237.19	24925.8	2316.69	2530.92
	25581.6	4451.23	3989.98	4166.63	25581.6	2398.39	2596.39	2864.93	25623.8	3573.75	3610.09	3332.5	25623.8	311.187	332.638	304.599	26189	1335.8	1339.64	1106.32	26189	1532.94	1579.91	1499.68	25623.8	3322.68	3099.31	3150.98	25623.8	764.345	724.603	638.569	26568.8	1455.4	1560.5	1859.23	26568.8	1513.82	1398.48	1390.68			25581.6	4451.23	3989.98	4166.63	25581.6	2398.39	2596.39
	26237.6	4490.35	3989.35	4149.8	26237.6	2538.21	2614.4	2888.97	26280.9	3523.07	3589.67	3544.16	26280.9	311.798	332.37	307.539	26860.5	1372.05	1382.98	1117.86	26860.5	1514.76	1567.78	1488.64	26280.9	3316.21	3130.63	3164.06	26280.9	765.027	732.368	638.64	27250.1	1477.71	1635.94	1898.64	27250.1	1508.08	1420.08	1400.48			26237.6	4490.35	3989.35	4149.8	26237.6	2538.21	2614.4
	26893.6	4448.87	4012.45	4114.74	26893.6	2616.89	2693.66	2881.95	26937.9	3467.63	3553.09	3498.97	26937.9	309.776	328.302	299.926	27532	1388.56	1434.93	1156.22	27532	1522.19	1570.9	1477.9	26937.9	3348.18	3100.33	3185.36	26937.9	771.912	725.147	639.039	27931.3	1467.92	1569.75	1956.85	27931.3	1491.24	1391.15	1394.95			26893.6	4448.87	4012.45	4114.74	26893.6	2616.89	2693.66
	27549.5	4409.79	4102.59	4128.21	27549.5	2714.54	2717.31	2935.66	27594.9	3428.41	3530.78	3475.11	27594.9	309.14	329.295	313.656	28203.5	1411.31	1448.3	1166.05	28203.5	1528.28	1568.59	1465.33	27594.9	3605.01	3105.45	3273.18	27594.9	782.283	733.247	652.883	28612.6	1439.6	1587.06	2020.44	28612.6	1509.09	1412.81	1399.25			27549.5	4409.79	4102.59	4128.21	27549.5	2714.54	2717.31
	28205.4	4498.05	4143.11	4161.4	28205.4	2807.44	2839.01	3035.82	28251.9	3352.36	3453.37	3400.31	28251.9	312.788	323.367	304.426	28875.1	1445.86	1494.97	1191.21	28875.1	1508.8	1575.11	1470.81	28251.9	3518.08	3041.41	3398.75	28251.9	781.62	733.135	641.026	29293.8	1417.83	1542.13	2060.92	29293.8	1479.62	1402.86	1403.98			28205.4	4498.05	4143.11	4161.4	28205.4	2807.44	2839.01
	28861.4	4526.58	4208.72	4183.28	28861.4	2922.79	3009.13	3096.08	28908.9	3311.56	3394.79	3357.84	28908.9	309.212	320.623	295.788	29546.5	1453.51	1504.05	1202.32	29546.5	1514.84	1576.52	1461.53	28908.9	3438.79	2996.42	3322.38	28908.9	779.946	725.302	649.736	29975.1	1406.24	1541.91	2095.63	29975.1	1487.03	1413.38	1391.59			28861.4	4526.58	4208.72	4183.28	28861.4	2922.79	3009.13
	29517.4	4651.94	4298.11	4254.57	29517.4	3085.82	3157.33	3163.47	29565.9	3254.22	3358.25	3322.16	29565.9	308.545	329.068	300.611	30218	1486.3	1505.52	1231.23	30218	1513.48	1580.59	1470.75	29565.9	3398.39	3004.64	3290.21	29565.9	779.654	737.941	652.467	30656.3	1419.98	1567.12	2151.32	30656.3	1494.97	1430.95	1426.52			29517.4	4651.94	4298.11	4254.57	29517.4	3085.82	3157.33
	30173.3	5129.32	4380.51	4230.37	30173.3	3261.29	3313.67	3232.93	30222.9	3217.5	3318.08	3293.01	30222.9	309.184	321.01	296.007	30890.2	1515.13	1513.15	1238.86	30890.2	1512.49	1572.34	1470.7	30222.9	3362.39	3018.67	3254.56	30222.9	782.01	736.748	648.247	31337.6	1422.29	1577.58	2217.21	31337.6	1463.36	1432.02	1420.68			30173.3	5129.32	4380.51	4230.37	30173.3	3261.29	3313.67
	30829.2	5118.97	4471.02	4354.41	30829.2	3309.52	3389.56	3267.64	30879.9	3191.55	3288.26	3240.76	30879.9	304.411	324.413	296.409	31561.7	1538.43	1522.14	1251.51	31561.7	1512.9	1577.72	1468.49	30879.9	3331.67	3153.53	3235.36	30879.9	781.332	733.371	666.337	32018.8	1489.07	1641.37	2378.77	32018.8	1480.42	1456.34	1439.23			30829.2	5118.97	4471.02	4354.41	30829.2	3309.52	3389.56
	31485.1	5109.75	4912.31	4425.15	31485.1	3410.97	3503.99	3319.83	31536.9	3132.55	3248.53	3194.87	31536.9	308.853	322.378	298.553	32233.2	1568.51	1519.42	1280.46	32233.2	1506.22	1570.78	1467.62	31536.9	3284.64	3302.96	3181.38	31536.9	791.856	747.322	680.797	32700.1	1487.14	1692.08	2426.94	32700.1	1469.7	1468.28	1428.34			31485.1	5109.75	4912.31	4425.15	31485.1	3410.97	3503.99
	32141	5110.31	4909.56	4574.51	32141	3532.31	3695.21	3430.44	32193.9	3102.16	3210.83	3164.75	32193.9	308.941	321.344	298.453	32904.7	1575.53	1502.62	1286.07	32904.7	1531.2	1588.31	1482.02	32193.9	3249.93	3260.63	3132.44	32193.9	784.404	751.436	679.779	33381.3	1553.29	1746	2425.95	33381.3	1515.37	1477.18	1451.49			32141	5110.31	4909.56	4574.51	32141	3532.31	3695.21
	32796.9	5117.39	4922.5	4620.56	32796.9	3597.9	3923.98	3494.74	32850.9	3060.66	3148.32	3123.84	32850.9	306.299	318.507	298.566	33576.4	1595.78	1486	1291.31	33576.4	1492.48	1575.1	1480.95	32850.9	3196.39	3219.61	3102.07	32850.9	786.175	748.784	682.93	34062.6	1579.58	1825.13	2464.38	34062.6	1507.15	1519.26	1493.99			32796.9	5117.39	4922.5	4620.56	32796.9	3597.9	3923.98
	33452.8	5092.84	4887.35	5046.5	33452.8	3710.93	3979.58	3542.91	33507.9	3005.67	3119.72	3076.53	33507.9	306.677	323.04	300.383	34247.8	1604.91	1469.28	1297.14	34247.8	1512.47	1590.43	1497.19	33507.9	3173.45	3180.4	3082.14	33507.9	794.556	750.863	680.303	34744.5	1620.87	1962.27	2529.57	34744.5	1503.76	1504.1	1472.18			33452.8	5092.84	4887.35	5046.5	33452.8	3710.93	3979.58
	34108.9	5111.28	4918.83	5042.03	34108.9	3790.06	4094.53	3617.81	34164.9	2991.25	3103.52	3054.23	34164.9	306.87	319.64	298.379	34919.4	1648.76	1478.53	1348.18	34919.4	1556.11	1635.34	1546.74	34164.9	3133.53	3168.12	3033.86	34164.9	805.715	750.527	693.704	35425.8	1646.38	1974.46	2536.1	35425.8	1474.39	1508.79	1477.49			34108.9	5111.28	4918.83	5042.03	34108.9	3790.06	4094.53
	34764.7	5095.48	4922.72	5057.37	34764.7	3839.95	4168.39	3693.59	34821.9	2942.93	3033.53	2995.89	34821.9	303.984	314.974	297.114	35590.8	1659.06	1458.62	1331.61	35590.8	1529.15	1620.2	1528.25	34821.9	3072.88	3091.89	2983.04	34821.9	787.836	749.976	695.009	36107.1	1621.65	2014.79	2509.31	36107.1	1481.97	1509.43	1467.22			34764.7	5095.48	4922.72	5057.37	34764.7	3839.95	4168.39
	35420.7	5142.58	4975.94	5086.76	35420.7	4001.55	4282.39	3809.73	35478.9	2917.65	3011.56	2965.11	35478.9	297.279	315.622	296.738	36262.3	1629.89	1403.09	1295.65	36262.3	1508.46	1581.01	1502.79	35478.9	3055.69	3074.5	2961.46	35478.9	787.902	756.749	700.115	36788.3	1773.82	2125.2	2606.95	36788.3	1527.81	1548.83	1522.94			35420.7	5142.58	4975.94	5086.76	35420.7	4001.55	4282.39
	36076.6	5125.07	4952.53	5039.62	36076.6	4057	4311.7	3838.08	36135.9	2873.51	2973.12	2930.94	36135.9	297.66	321.503	294.017	36933.8	1671.85	1402.2	1306.23	36933.8	1521.59	1592.25	1529.14	36135.9	3017.7	3037.05	2939.14	36135.9	794.429	755.108	704.18	37469.6	1734.46	2112.1	2572.42	37469.6	1508.95	1535.06	1481.32			36076.6	5125.07	4952.53	5039.62	36076.6	4057	4311.7
	36732.5	5103.55	4901.22	4993.81	36732.5	4054.71	4365.05	3874.03	36792.9	2838.72	2944.16	2888.99	36792.9	299.136	320.415	295.217	37605.3	1674.75	1386	1322.79	37605.3	1520.07	1590.42	1530.52	36792.9	2978.93	2987.6	2876.79	36792.9	782.024	744.362	715.965	38150.8	1775.7	2114.3	2605.55	38150.8	1494.27	1521.39	1492.48			36732.5	5103.55	4901.22	4993.81	36732.5	4054.71	4365.05
	37388.4	5099.49	4931.55	5020.19	37388.4	4153.4	4446.83	3954.34	37449.9	2815.01	2899.09	2866.42	37449.9	298.588	317.898	294.159	38276.8	1681.01	1313.94	1327.32	38276.8	1520.1	1605.11	1546.72	37449.9	2944.61	2970.07	2855.75	37449.9	787.746	748.636	703.2	38832.1	1797.35	2146.66	2712.93	38832.1	1492.45	1546.72	1494.31			37388.4	5099.49	4931.55	5020.19	37388.4	4153.4	4446.83
	38044.3	5135.43	4958.04	5016.52	38044.3	4176.9	4551.52	4023.31	38106.9	2785.06	2888.79	2835.19	38106.9	299.579	317.425	293.372	38948.3	1696.89	1292.43	1333.36	38948.3	1531.89	1602.03	1547.72	38106.9	2941.32	2961.74	2849.13	38106.9	787.027	752.523	726.75	39513.3	1855.11	2213.5	2711.68	39513.3	1511.65	1553.11	1507.4			38044.3	5135.43	4958.04	5016.52	38044.3	4176.9	4551.52
	38700.2	5083.12	4940.89	5019.82	38700.2	4262.82	4593.49	4080.87	38763.9	2768.29	2878.37	2812.53	38763.9	301.698	317.269	292.219	39619.8	1738.32	1288.78	1276.63	39619.8	1518.47	1595.75	1563.43	38763.9	2909.92	2937.18	2811.9	38763.9	791.04	753.465	724.349	40194.5	1915.39	2253.44	2765.78	40194.5	1559.21	1583.1	1521.36			38700.2	5083.12	4940.89	5019.82	38700.2	4262.82	4593.49
	39356.1	5029.39	4907.29	4957.2	39356.1	4252.33	4596.26	4095	39420.9	2713.75	2810.07	2764.28	39420.9	298.997	318.852	291.372	40291.3	1732.78	1277.46	1237.67	40291.3	1529.56	1613.88	1578.17	39420.9	2860.18	2873.19	2750.62	39420.9	784.756	757.995	738.624	40875.8	2008.56	2306.67	2762.24	40875.8	1553.53	1587.92	1522.06			39356.1	5029.39	4907.29	4957.2	39356.1	4252.33	4596.26
	40012	5116.74	4956.81	5013.28	40012	4294.27	4669.07	4180.99	40077.9	2696.42	2782.88	2741.5	40077.9	298.767	313.865	290.412	40962.8	1741.09	1276.82	1241.6	40962.8	1511.84	1609.58	1578.24	40077.9	2842.94	2849.95	2734.57	40077.9	781.478	761.172	736.891	41557.1	2119.47	2313.98	2798.13	41557.1	1558.21	1602.3	1528.44			40012	5116.74	4956.81	5013.28	40012	4294.27	4669.07
	40668	5038.16	4922.8	4962.19	40668	4296.48	4696.67	4187.6	40734.9	2638.8	2730.33	2682.25	40734.9	294.775	316.926	291.304	41634.3	1803.59	1295.96	1261.51	41634.3	1516.74	1595.25	1595.74	40734.9	2797.14	2817.79	2701.07	40734.9	781.678	753.334	731.882	42238.8	2040.62	2293.61	2801.74	42238.8	1558.62	1605.63	1526.77			40668	5038.16	4922.8	4962.19	40668	4296.48	4696.67
	41323.9	5078.73	4967.68	5016.4	41323.9	4385.53	4754.64	4277.68	41391.9	2620.55	2728.48	2677.17	41391.9	293.086	310.936	287.335	42305.8	1808.06	1298.65	1273.11	42305.8	1521.68	1602.07	1630.71	41391.9	2789.19	2806.59	2681.75	41391.9	773.181	747.041	733.673	42920.1	2090.29	2365.54	2802.03	42920.1	1583.28	1629.87	1549.04			41323.9	5078.73	4967.68	5016.4	41323.9	4385.53	4754.64
	41979.8	5064	4937.42	4954.68	41979.8	4393.83	4797.86	4298.79	42048.9	2595.73	2687.35	2635.03	42048.9	301.929	310.067	291.262	42977.3	1761.04	1301.82	1275.66	42977.3	1509.1	1598.57	1655.07	42048.9	2750.53	2758.23	2649.19	42048.9	780.147	749.417	725.721	43601.3	2083.61	2326.62	2818.02	43601.3	1561.47	1636.72	1541.23			41979.8	5064	4937.42	4954.68	41979.8	4393.83	4797.86
	42635.7	5048.36	4931.35	4939.88	42635.7	4393.38	4812.6	4341.06	42705.9	2565.28	2650.1	2610.52	42705.9	301.239	313.419	287.341	43648.8	1854.11	1319.18	1287.18	43648.8	1547.52	1629.71	1727.59	42705.9	2727.75	2738.91	2636.06	42705.9	784.883	750.108	738.936	44282.5	2091.8	2414.05	2846.92	44282.5	1586.89	1652.57	1563.82			42635.7	5048.36	4931.35	4939.88	42635.7	4393.38	4812.6
	43291.6	5056.45	4930.53	4961	43291.6	4366.4	4836.42	4393.42	43362.9	2542.01	2623.25	2579.53	43362.9	301.905	310.053	288.861	44320.3	1897.78	1304.07	1284.3	44320.3	1514.32	1601.45	1700.39	43362.9	2690.57	2710.67	2605.78	43362.9	783.525	748.047	740.134	44963.8	2128.6	2404.93	2839.41	44963.8	1592.67	1642.09	1563.15			43291.6	5056.45	4930.53	4961	43291.6	4366.4	4836.42
	43947.5	5024.66	4887.97	4895.8	43947.5	4390.21	4817.2	4394.78	44019.9	2505.98	2602.75	2542.26	44019.9	292.423	311.131	289.434	44991.8	2129.91	1302.8	1292.31	44991.8	1529.3	1613.73	1693.75	44019.9	2664.75	2672.26	2581.23	44019.9	775.899	737.547	732.624	45645	2143.26	2443.2	2850.33	45645	1611.81	1670.74	1587.11			43947.5	5024.66	4887.97	4895.8	43947.5	4390.21	4817.2
	44603.4	5033.48	4907.87	4895.76	44603.4	4417.38	4853.42	4459.5	44676.9	2498.56	2576.51	2520.03	44676.9	293.812	310.535	286.347	45663.3	2465.28	1320.45	1308.81	45663.3	1528.89	1599.06	1711.66	44676.9	2645.01	2641.96	2545.48	44676.9	775.329	735.477	728.757	46326.3	2168.42	2482.77	2853.06	46326.3	1648.57	1698.59	1622.38			44603.4	5033.48	4907.87	4895.76	44603.4	4417.38	4853.42
	45259.3	4994.14	4889.68	4869.27	45259.3	4402.16	4820.01	4453.3	45333.9	2463.91	2541.77	2495.31	45333.9	291.781	311.162	289.3	46334.8	2092.02	1324.34	1317.31	46334.8	1516.11	1602.25	1692.87	45333.9	2624.89	2620.92	2533.91	45333.9	771.195	737.161	736.893	47007.5	2202.38	2500.29	2858.32	47007.5	1658.26	1718.31	1624.71			45259.3	4994.14	4889.68	4869.27	45259.3	4402.16	4820.01
	45915.2	4959.31	4848.84	4838.49	45915.2	4436.9	4833.39	4492.88	45990.9	2422.62	2500.89	2458.95	45990.9	291.19	310.233	288.449	47006.3	1997.63	1337.43	1327.05	47006.3	1522.66	1617.62	1748.77	45990.9	2589.07	2589.38	2494.29	45990.9	774.705	734.025	746.486	47688.8	2176.03	2513.93	2870.16	47688.8	1653.07	1728.02	1638.41			45915.2	4959.31	4848.84	4838.49	45915.2	4436.9	4833.39
	46571.1	4985.74	4881.8	4875.52	46571.1	4424.22	4854.39	4541.03	46647.9	2416.21	2510.95	2446.73	46647.9	293.375	310.351	288.276	47677.8	1911.49	1333.31	1324.61	47677.8	1526.38	1613.44	1758.34	46647.9	2582.74	2591.18	2501.01	46647.9	771.005	732.231	737.542	48370	2197.33	2541.29	2881.66	48370	1671.52	1727.62	1653.23			46571.1	4985.74	4881.8	4875.52	46571.1	4424.22	4854.39
	47227	4933.02	4838.09	4789.17	47227	4447.51	4815.04	4509.41	47304.9	2388.01	2478.51	2422.83	47304.9	293.707	310.393	287.525	48349.3	1982.79	1336.4	1340.6	48349.3	1520.71	1604.72	1760.06	47304.9	2567.57	2567.76	2484.99	47304.9	770.057	736.794	734.18	49051.3	2178.51	2537.33	2862.61	49051.3	1697.16	1758.55	1693.07			47227	4933.02	4838.09	4789.17	47227	4447.51	4815.04
	47883	4947.34	4853.36	4810.22	47883	4402.02	4821.72	4542.54	47961.9	2379.02	2456.25	2412.62	47961.9	296.3	311.722	288.18	49020.8	1997.59	1345.92	1349.73	49020.8	1529.39	1622.06	1781.03	47961.9	2552.53	2554.52	2445.84	47961.9	771.286	735.704	737.555	49732.5	2167.11	2562.54	2870.9	49732.5	1708.6	1772.06	1682.68			47883	4947.34	4853.36	4810.22	47883	4402.02	4821.72
	48538.9	4897.37	4806.59	4785.22	48538.9	4386.33	4808.7	4537.26	48618.9	2353.92	2417.57	2375.79	48618.9	293.54	313.212	284.725	49692.3	1942.67	1349.25	1333.13	49692.3	1526.34	1621.42	1784.19	48618.9	2525.63	2523.38	2428.9	48618.9	777.506	729.724	743.65	50413.8	2147.28	2568.42	2874.88	50413.8	1719.27	1784.85	1703.69			48538.9	4897.37	4806.59	4785.22	48538.9	4386.33	4808.7
	49194.8	4888.29	4803.89	4775.17	49194.8	4395.19	4802.21	4551.05	49275.9	2319.34	2409.65	2355.15	49275.9	293.204	308.236	288.927	50363.8	1961.05	1353.87	1346.31	50363.8	1512.35	1622.75	1788.67	49275.9	2515.08	2523	2433.27	49275.9	771.195	725.613	740.366	51095	2144.74	2580.82	2860.67	51095	1722.09	1779.48	1725.63			49194.8	4888.29	4803.89	4775.17	49194.8	4395.19	4802.21
	49850.8	4896.7	4789.13	4746.69	49850.8	4393.04	4772.08	4554.16	49932.9	2295.46	2375.95	2326.03	49932.9	294.394	313.376	289.569	51035.3	1910.21	1347.28	1353.31	51035.3	1522.4	1625.68	1793.67	49932.9	2479.83	2477.88	2395.64	49932.9	770.985	735.706	741.827	51776.3	2132.51	2552.94	2864.58	51776.3	1740.89	1807.79	1749.36			49850.8	4896.7	4789.13	4746.69	49850.8	4393.04	4772.08
	50506.8	4849.54	4781.67	4712.22	50506.8	4366.56	4775.68	4563.11	50589.9	2305.98	2361.63	2306.93	50589.9	294.562	314.117	289.536	51706.8	1981.38	1335.23	1349.28	51706.8	1524.2	1626.81	1797.94	50589.9	2461.47	2475.52	2376.65	50589.9	772.319	729.44	745.237	52457.5	2201.34	2565.96	2847.42	52457.5	1751.14	1818.14	1756.57			50506.8	4849.54	4781.67	4712.22	50506.8	4366.56	4775.68
	51162.7	4839.96	4776.36	4737.9	51162.7	4428.29	4827.32	4621.29	51246.9	2271.66	2337.12	2303.24	51246.9	294.783	308.946	287.334	52378.3	2091.7	1336.01	1353.95	52378.3	1503.42	1625.16	1788.9	51246.9	2462.33	2455.62	2364.67	51246.9	768.359	732.326	744.804	53138.8	2277.27	2557.7	2852.51	53138.8	1776.62	1810.7	1771.04			51162.7	4839.96	4776.36	4737.9	51162.7	4428.29	4827.32
	51818.6	4861.8	4796.1	4763.09	51818.6	4405.57	4795.52	4605.28	51903.9	2254.23	2327.96	2278.98	51903.9	292.668	310.064	287.762	53049.9	2263.2	1338.47	1370.31	53049.9	1527.23	1616.7	1791.51	51903.9	2449.32	2447.98	2359.91	51903.9	767.636	724.941	739.959	53820	2396.15	2570.88	2984	53820	1780.21	1818.86	1792.89			51818.6	4861.8	4796.1	4763.09	51818.6	4405.57	4795.52
	52474.5	4856.23	4797.71	4729.74	52474.5	4452.29	4747.39	4580.97	52560.9	2253.43	2334.57	2279.97	52560.9	292.082	309.609	287.522	53721.4	2413.06	1342.86	1381.76	53721.4	1530.87	1628.58	1810.65	52560.9	2461.9	2460.95	2376.12	52560.9	774.101	731.57	743.726	54501.2	2543.92	2555.15	2941.78	54501.2	1802.1	1837.78	1813.65			52474.5	4856.23	4797.71	4729.74	52474.5	4452.29	4747.39
	53131.2	4812.19	4753.15	4720.6	53131.2	4418.21	4776.89	4614.09	53217.9	2230.15	2304.95	2256.16	53217.9	289.443	304.299	287.358	54392.9	2885.23	1357.82	1366.27	54392.9	1518.37	1620.69	1817.5	53217.9	2433.44	2420.26	2342.4	53217.9	768.278	727.908	734.338	55182.5	2527.29	2561.58	2960.49	55182.5	1808.03	1836.8	1820.87			53131.2	4812.19	4753.15	4720.6	53131.2	4418.21	4776.89
	53787.1	4819.71	4761.94	4726.21	53787.1	4402.57	4730.2	4591.65	53874.9	2217.3	2276.9	2236.97	53874.9	292.825	312.211	289.74	55064.4	2842.93	1409.64	1378.87	55064.4	1532.37	1628.98	1804.38	53874.9	2408.28	2401.82	2315.7	53874.9	769.462	729.309	746.574	55863.7	2537.68	2555.64	2979.2	55863.7	1839.43	1841.69	1849.09			53787.1	4819.71	4761.94	4726.21	53787.1	4402.57	4730.2
	54443	4799.07	4748.02	4733.14	54443	4395.61	4762.25	4558.73	54531.9	2202.7	2255.79	2218.88	54531.9	290.38	312.652	287.618	55735.9	2863.39	1392.44	1362.8	55735.9	1525.22	1640.77	1822.32	54531.9	2395.6	2399.56	2317.72	54531.9	762.846	729.296	743.898	56545	2519	2543.78	2934.6	56545	1848.07	1846.31	1861.37			54443	4799.07	4748.02	4733.14	54443	4395.61	4762.25
	55098.9	4770.87	4740.2	4720.27	55098.9	4387.21	4743.99	4576.13	55188.9	2188.29	2257.67	2208.98	55188.9	296.863	308.73	288.405	56407.4	2879.92	1496.14	1354.49	56407.4	1499.72	1621.79	1803.6	55188.9	2390.37	2390.18	2316.1	55188.9	773.489	730.689	749.805	57226.3	2516.56	2538.49	2938.87	57226.3	1877.53	1877.53	1888.51			55098.9	4770.87	4740.2	4720.27	55098.9	4387.21	4743.99
	55754.8	4772.61	4740.58	4712.46	55754.8	4410.34	4750.55	4573.35	55845.9	2164.58	2224.24	2177.63	55845.9	293.766	309.666	287.516	57078.9	2843.39	1548.57	1354.43	57078.9	1517.85	1627.91	1813.79	55845.9	2354.52	2338.82	2281.3	55845.9	765.823	721.658	743.572	57907.5	2529.31	2551.66	2941.85	57907.5	1912.37	1881.83	1919.09			55754.8	4772.61	4740.58	4712.46	55754.8	4410.34	4750.55
	56410.7	4761.85	4733.49	4712.29	56410.7	4428.51	4735.49	4558.6	56502.9	2160.34	2222.13	2174.98	56502.9	292.447	309.686	288.668	57750.4	2844.58	1630.27	1344.25	57750.4	1519.5	1636.26	1812.49	56502.9	2355.41	2350.37	2276.8	56502.9	765.841	727.877	738.258	58588.7	2522.96	2572.9	2952.2	58588.7	1910.77	1871.55	1923.89			56410.7	4761.85	4733.49	4712.29	56410.7	4428.51	4735.49
	57066.6	4726.41	4694.34	4687.27	57066.6	4391.13	4734.55	4571.67	57159.9	2135.78	2201.98	2157.5	57159.9	292.208	312.588	290.234	58421.9	2863.01	1669.29	1316.14	58421.9	1514.74	1634.14	1827.85	57159.9	2335.47	2317.39	2256.12	57159.9	763.596	726.739	751.289	59270	2523.11	2554.36	2930.33	59270	1912.05	1883.56	1943.38			57066.6	4726.41	4694.34	4687.27	57066.6	4391.13	4734.55
	57722.5	4753.65	4728.39	4712.02	57722.5	4423.87	4747.91	4568.07	57816.9	2121.01	2185.13	2149.4	57816.9	296.699	309.334	288.652	59093.4	2811.78	1831.7	1306.6	59093.4	1514.05	1631.23	1825.84	57816.9	2323.2	2324.68	2256.19	57816.9	766.292	730.797	747.389	59951.2	2526.69	2580.19	2956.84	59951.2	1937.08	1896.93	1965.4			57722.5	4753.65	4728.39	4712.02	57722.5	4423.87	4747.91
	58378.4	4749.66	4726.94	4723.61	58378.4	4384.41	4736.91	4540.12	58473.9	2104.72	2172.23	2126.2	58473.9	301.554	311.405	288.637	59764.9	2824.2	1890.93	1270.32	59764.9	1509.72	1637.91	1818.39	58473.9	2313.42	2303.98	2243.96	58473.9	778.143	728.706	749.299	60632.5	2494.78	2544	2899.34	60632.5	1941.13	1903.28	1975.87			58378.4	4749.66	4726.94	4723.61	58378.4	4384.41	4736.91
	59034.3	4729.36	4722.32	4701.41	59034.3	4381.79	4707.7	4525.92	59130.9	2083.52	2152.78	2101.71	59130.9	293.402	307.167	287.314	60436.4	2695.25	1877.74	1266.94	60436.4	1511.22	1641.26	1826.11	59130.9	2296.39	2295	2234.84	59130.9	773.514	727.549	737.488	61313.7	2537.01	2567.64	2917.42	61313.7	1944.18	1894.14	1976.26			59034.3	4729.36	4722.32	4701.41	59034.3	4381.79	4707.7
	59690.2	4681.97	4664.34	4678.52	59690.2	4375.5	4692.28	4540.45	59787.9	2073.06	2134.52	2094.41	59787.9	292.219	308.896	286.273	61107.9	2693.19	1884.91	1284.63	61107.9	1540.3	1673.98	1857.17	59787.9	2289.69	2281.28	2231.95	59787.9	768.109	719.936	740.008	61995	2489	2537.61	2930.23	61995	1966.12	1917.64	2005.63			59690.2	4681.97	4664.34	4678.52	59690.2	4375.5	4692.28
	60346.1	4677.63	4678.12	4679	60346.1	4366.04	4682.08	4513.43	60444.9	2071.46	2135.43	2090.4	60444.9	291.494	307.59	291.689	61779.5	2671.24	1913.84	1288.37	61779.5	1517.9	1650.7	1831.01	60444.9	2284.62	2277.9	2233.29	60444.9	765.922	726.124	739.748	62676.2	2484.92	2521.99	2920.4	62676.2	1980.56	1923.08	2031.37			60346.1	4677.63	4678.12	4679	60346.1	4366.04	4682.08
	61002	4687.49	4692.41	4707.12	61002	4382.54	4665.09	4472.57	61101.9	2070.01	2118.28	2065.08	61101.9	293.531	307.03	284.759									61101.9	2275.17	2267.52	2212.09	61101.9	759.092	714.458	745.114	63357.5	2444.47	2556.69	2916.97	63357.5	1985.08	1915.23	2037.6			61002	4687.49	4692.41	4707.12	61002	4382.54	4665.09
	61658	4681.3	4677.67	4692.11	61658	4399.13	4697.39	4511.04	61759	2045.52	2097.09	2054.97	61759	292.075	307.669	287.485									61759	2263.96	2260.61	2213.54	61759	758.587	718.118	739.872	64038.7	2502.16	2551.7	2915.26	64038.7	1997.21	1930	2079.43			61658	4681.3	4677.67	4692.11	61658	4399.13	4697.39
	62313.9	4672.4	4666.01	4680.87	62313.9	4403.4	4711.11	4514.51	62416	2022.13	2081.59	2040.48	62416	293.305	306.256	288.608									62416	2237.56	2232.87	2192.72	62416	762.283	716.943	733.105	64720	2488.37	2538.46	2935.59	64720	2002.78	1928.79	2081.55			62313.9	4672.4	4666.01	4680.87	62313.9	4403.4	4711.11
	62969.8	4657.85	4651.75	4686.34	62969.8	4391.93	4699.64	4485.04	63073	2011.99	2070.49	2025.06	63073	295.016	306.495	285.489									63073	2236.22	2222.55	2187.55	63073	763.588	716.339	739.599	65401.2	2458.05	2498.63	2877.76	65401.2	2021.29	1944.67	2079.72			62969.8	4657.85	4651.75	4686.34	62969.8	4391.93	4699.64
	63625.7	4664.47	4674.43	4716.03	63625.7	4406.35	4679.99	4464.13	63730	1990.64	2040.22	1995.26	63730	290.204	307.969	284.905									63730	2193.58	2199.37	2164.44	63730	759.127	718.277	734.586	66082.5	2494.88	2527.4	2871.55	66082.5	2019.09	1959.38	2114.82			63625.7	4664.47	4674.43	4716.03	63625.7	4406.35	4679.99
	64281.6	4665.08	4681.52	4714.84	64281.6	4372.06	4675.61	4470.68	64387	2002.32	2047.43	2001.27	64387	292.679	304.837	284.965									64387	2221.03	2218.58	2172.43	64387	755.753	712.346	741.549	66763.7	2457.23	2518.22	2879.51	66763.7	2017.96	1947.87	2115.36			64281.6	4665.08	4681.52	4714.84	64281.6	4372.06	4675.61
	64937.5	4656.5	4680.17	4709.15	64937.5	4402.91	4715.29	4502.38	65044.7	1981.29	2031.21	1981.78	65044.7	291.488	307.597	286.691									65044.7	2195.58	2196.48	2162.96	65044.7	752.875	712.516	748.494	67444.9	2465.34	2526.28	2912.3	67444.9	2036.59	1964.86	2136.26			64937.5	4656.5	4680.17	4709.15	64937.5	4402.91	4715.29
	65593.4	4623.03	4656.23	4667.54	65593.4	4398.91	4674.26	4457.76	65701.7	1965.64	2007.74	1963.57	65701.7	290.399	307.475	286.858									65701.7	2170.85	2190.93	2155.54	65701.7	754.959	712.575	730.617	68126.2	2439.71	2511.84	2893.93	68126.2	2052.96	1977.73	2154.86			65593.4	4623.03	4656.23	4667.54	65593.4	4398.91	4674.26
									66358.7	1953.16	2001.18	1952.81	66358.7	289.817	302.242	286.021									66358.7	2162.19	2174.43	2142.77	66358.7	756.128	712.802	741.985	68807.4	2477.03	2518.58	2873.77	68807.4	2062.68	1998.03	2177.34
									67015.7	1942.14	1991.1	1935.75	67015.7	290.988	304.299	286.4									67015.7	2161.08	2163.36	2143.96	67015.7	753.997	700.053	732.125	69488.7	2448.73	2515.74	2861.82	69488.7	2066.85	1993.6	2187.01
									67672.7	1935.8	1977.41	1938.87	67672.7	289.63	301.664	286.359									67672.7	2154.43	2161.22	2144.08	67672.7	759.585	701.812	725.119	70169.9	2435.92	2499.75	2897.7	70169.9	2060.6	2012.04	2206.62
									68329.7	1915.46	1966.14	1912.88	68329.7	293.621	306.36	285.29									68329.7	2132.8	2138.85	2117.67	68329.7	736.516	716.282	716.469	70851.2	2466.83	2523.34	2936.42	70851.2	2098.72	2035.07	2240.71
									68986.7	1912.58	1950.93	1909.48	68986.7	289.721	307.322	284.336									68986.7	2130.1	2144.19	2116.68	68986.7	714.955	708.432	709.878	71532.4	2413.64	2471.73	2823.62	71532.4	2081.02	2031.63	2231.07
									69643.7	1925.62	1954.53	1908.71	69643.7	291.609	306.13	285.619									69643.7	2129.22	2132.16	2124.64	69643.7	712.253	705.693	714.136	72213.7	2402.12	2486.71	2903.18	72213.7	2067.26	2024.93	2228.99
									70300.7	1907.02	1947.54	1894.19	70300.7	290.271	304.446	285.957									70300.7	2113.34	2125.97	2109.79	70300.7	705.975	694.342	716.555	72894.9	2413.6	2492.84	2927.28	72894.9	2089.42	2042.94	2245.76
									70957.7	1896.56	1927.8	1884.65	70957.7	290.499	304.827	288.417									70957.7	2110.31	2118.63	2109.72	70957.7	705.4	673.357	724.856	73576.2	2406.61	2527.63	2849.88	73576.2	2092.79	2049.68	2262.14
									71614.7	1889.22	1930.59	1879.41	71614.7	291.739	306.605	287.134									71614.7	2105.3	2105.57	2098.31	71614.7	715.082	669.095	721.342	74257.4	2393.88	2475.54	2853.45	74257.4	2103.89	2067.91	2292.65
									72271.7	1862.24	1899.5	1867.57	72271.7	289.623	301.749	282.451									72271.7	2087.13	2091.6	2093.57	72271.7	716.149	663.724	719.393	74938.7	2423.44	2475.78	2894.6	74938.7	2107.8	2051.54	2285.19
									72928.7	1871.65	1908.76	1860.2	72928.7	296.128	303.785	283.791									72928.7	2084.96	2090.86	2096	72928.7	722.677	662.382	733.712	75620.6	2390.53	2457.81	2888.68	75620.6	2104.17	2067.8	2292.26
									73585.7	1860.23	1896.81	1840.46	73585.7	294.26	305.358	285.677									73585.7	2075.02	2075.9	2096.78	73585.7	721.589	661.859	727.91	76301.9	2372.72	2455.65	2822.94	76301.9	2113.4	2082.07	2297.16
									74242.7	1852.77	1887.04	1840.04	74242.7	287.232	298.323	284.301									74242.7	2066.93	2074.08	2082.21	74242.7	719.54	667.221	735.203	76983.1	2376.97	2471.12	2868.52	76983.1	2138.03	2096.18	2344
																																	77664.4	2381.78	2468.13	2914.45	77664.4	2135.75	2111.37	2337.21
																																	78345.6	2385.16	2463.38	2874.85	78345.6	2136.57	2127.03	2368.66
																																	79026.9	2382.11	2492.8	2835.64	79026.9	2163.85	2141.09	2381.79
																																	79708.1	2363.83	2460.25	2871.75	79708.1	2177.39	2157.9	2406.83
																																	80389.4	2349.03	2433.54	2873.08	80389.4	2157.44	2150.01	2384.59
																																	81070.7	2338.98	2465.3	2863.34	81070.7	2203.67	2202.6	2459.64
																																	81751.9	2328.81	2443.38	2847.49	81751.9	2197	2188.57	2438.48
																																	82433.2	2334.24	2456.36	2870.25	82433.2	2214.77	2218.89	2456.2
																																	83114.4	2320.21	2453.64	2863.67	83114.4	2213.13	2247.8	2447.72
																																	83795.7	2309.11	2434.82	2899.68	83795.7	2234.03	2300.94	2461.02
																																	84476.9	2316.58	2401.64	2843.98	84476.9	2251.11	2345.41	2490.7
																																	85158.2	2310.61	2452.38	2853.89	85158.2	2271.32	2412.2	2528.99
[truncated: 53 more columns]

## Sheet: FigS10A-final
Sau vector control	Sau Apo	Guide GFP2 noncoding_1	RNP GFP2 noncoding_1	Guide GFP2 coding_1	RNP GFP2 coding_1	Guide GFP6 noncoding_1	RNP GFP6 noncoding_1	Guide GFP6 coding_1	RNP GFP6 coding_1
2067.64	1799.65	1411.31	1722.4	3108.24	311.798	2040.62	1912.37	3463.24	782.01
1843.85	2166.21	1402.2	1843.35	2927.63	337.067	2326.62	1779.48	2898.62	733.371
2051.99	1926.84	1276.63	1524.88	2943.02	299.926	2060.92	1813.65	2867.53	680.303
Normalized to vectors		Guide GFP2 noncoding_1	RNP GFP2 noncoding_1	Guide GFP2 coding_1	RNP GFP2 coding_1	Guide GFP6 noncoding_1	RNP GFP6 noncoding_1	Guide GFP6 coding_1	RNP GFP6 coding_1
		0.682571	0.957076	1.50328	0.173255	0.986934	1.06263	1.67497	0.434536
		0.760474	0.850958	1.58778	0.155602	1.26183	0.821473	1.57205	0.338551
		0.622143	0.791387	1.43422	0.155657	1.00435	0.941257	1.39744	0.353067
Normalized to guide		GFP2 noncoding	GFP2 coding	GFP6 noncoding	GFP6 coding
		1.40216	0.115251	1.0767	0.259428
		1.11898	0.0979997	0.651019	0.215357
		1.27204	0.10853	0.937182	0.252653
Sidak's multiple comparisons test	Mean Diff.	95.00% CI of diff.	Significant?	Summary	Adjusted P Value
Sa RNP1 Noncoding vs. Sa RNP1 Coding	1.08	0.851 to 1.308	Yes	****	<0.0001
Sa RNP2 Noncoding vs. Sa RNP2 Coding	0.5997	0.3712 to 0.8282	Yes	***	0.0002

## Sheet: FigS10C-final
Sau vector control	Sau Apo	Guide GFP1	dRNP GFP1	WtRNP GFP1	Guide GFP2	dRNP GFP2	WtRNP GFP2	Guide GFP7	dRNP GFP7	WtRNP GFP7	Guide GFP12	dRNP GFP12	WtRNP GFP12
2067.64	1799.65	457.699	388.47	467.216	3108.24	311.798	221.547	1405.07	1888.45	1431.42	975.916	476.832	246.702
1843.85	2166.21	530.847	418.087	540.785	2927.63	337.067	229.166	1425.85	1853.23	1431.64	1035.42	452.621	235.644
2051.99	1926.84	649.028	413.221	394.759	2943.02	299.926	237.347	1281.89	1607.54	1332.63	1033.89	465.173	228.107
Normalized to vectors		Guide GFP1	dRNP GFP1	WtRNP GFP1	Guide GFP2	dRNP GFP2	WtRNP GFP2	Guide GFP7	dRNP GFP7	WtRNP GFP7	Guide GFP12	dRNP GFP12	WtRNP GFP12
		0.221363	0.215859	0.375245	1.50328	0.173255	0.177936	0.679553	1.04934	1.14965	0.471996	0.264959	0.198139
		0.287902	0.193004	0.268893	1.58778	0.155602	0.113948	0.7733	0.855519	0.71185	0.561554	0.208947	0.117169
		0.316291	0.214455	0.216055	1.43422	0.155657	0.129903	0.624704	0.834287	0.72936	0.503847	0.241417	0.124845
Normalized to guides		dSau GFP1	WtSau GFP1	dSau GFP2	WtSau GFP2	dSau GFP7	WtSau GFP7	dSau GFP12	WtSau GFP12
		0.975135	1.69516	0.115251	0.118365	1.54417	1.69177	0.561359	0.419789
		0.670382	0.933974	0.0979997	0.0717652	1.10632	0.920536	0.372086	0.20865
		0.67803	0.68309	0.10853	0.0905734	1.33549	1.16753	0.479148	0.247784
Sidak's multiple comparisons test	Mean Diff.	95.00% CI of diff.	Significant?	Summary	Adjusted P Value
dSau GFP1 vs. WtSau GFP1	-0.3296	-0.9206 to 0.2615	No	ns	0.4467
dSau GFP2 vs. WtSau GFP2	0.01369	-0.5774 to 0.6048	No	ns	>0.9999
dSau GFP7 vs. WtSau GFP7	0.06871	-0.5224 to 0.6598	No	ns	0.996
dSau GFP12 vs. WtSau GFP12	0.1788	-0.4123 to 0.7699	No	ns	0.8779
