# Supplementary material for: RNA-dependent RNA targeting by CRISPR-Cas9
Source: eLife journal article supplement (doi:10.7554/elife.32724), 2018-01-05
Supplement: supp [file elife-32724-supp-v1.zip › elife_poa_e32724_Figure_4_source_data_1.xlsx]

## Sheet: GFP
Fig4A	Time [s]	Null-Null_1	Null-Null_2	Null-Null_3	Time [s]	Sa-Null_1	Sa-Null_2	Sa-Null_3	Time [s]	Null-SpyNull_1	Null-SpyNull_2	Null-SpyNull_3	Time [s]	Spy Apo_1	Spy Apo_2	Spy Apo_3	Time [s]	SpyG1_1	SpyG1_2	SpyG1_3	Time [s]	SpyG2_1	SpyG2_2	SpyG2_3	Time [s]	SpyG3_1	SpyG3_2	SpyG3_3	Time [s]	SpyG4_1	SpyG4_2	SpyG4_3	Time [s]	Spy1_1	Spy1_2	Spy1_3	Time [s]	Spy2_1	Spy2_2	Spy2_3	Time [s]	Spy3_1	Spy3_2	Spy3_3	Time [s]	Spy4_1	Spy4_2	Spy4_3	Time [s]
	0	107.778	81.7778	104.778	0	98.7778	96.7778	108.778	0	107.778	81.7778	104.778	0	128.778	157.778	144.778	0	44	44	48	0	32	34	27	0	48	43	48	0	54	54	51	0	4	4	3	0	27	20	20	0	34	34	36	0	5	5	5	0
	655.9	118	87	114	655.9	107	104	120	655.9	118	87	114	682.6	132.667	164.667	150.667	674.6	47.3333	50.3333	53.3333	674.6	36.3333	37.3333	29.3333	674.6	52.3333	47.3333	52.3333	674.6	59.3333	62.3333	54.3333	674.6	4.33333	3.33333	3.33333	674.6	29.3333	21.3333	23.3333	674.6	37.3333	37.3333	39.3333	674.6	4.33333	5.33333	5.33333	657
	1311.8	123.444	93.4444	121.444	1311.8	109.444	108.444	123.444	1311.8	123.444	93.4444	121.444	1365.1	138.556	168.556	156.556	1349.1	54.8333	53.8333	60.8333	1349.1	42.8333	43.8333	34.8333	1349.1	57.8333	53.8333	59.8333	1349.1	67.8333	66.8333	62.8333	1349.1	4.83333	4.83333	4.83333	1349.1	32.8333	22.8333	25.8333	1349.1	39.8333	39.8333	40.8333	1349.1	4.83333	5.83333	4.83333	1314
	1967.8	135.889	103.889	130.889	1967.8	111.889	113.889	126.889	1967.8	135.889	103.889	130.889	2047.7	146.667	175.667	163.667	2023.5	63.6667	62.6667	71.6667	2023.5	52.6667	52.6667	41.6667	2023.5	67.6667	63.6667	70.6667	2023.5	77.6667	77.6667	73.6667	2023.5	4.66667	5.66667	4.66667	2023.5	34.6667	24.6667	26.6667	2023.5	42.6667	43.6667	43.6667	2023.5	6.66667	5.66667	5.66667	1971
	2623.7	151.444	115.444	146.444	2623.7	119.444	117.444	131.444	2623.7	151.444	115.444	146.444	2730.2	152.222	183.222	169.222	2697.9	74.1667	72.1667	83.1667	2697.9	65.1667	66.1667	52.1667	2697.9	78.1667	73.1667	82.1667	2697.9	90.1667	91.1667	85.1667	2697.9	4.16667	7.16667	4.16667	2697.9	37.1667	26.1667	26.1667	2697.9	46.1667	44.1667	44.1667	2697.9	6.16667	6.16667	6.16667	2628
	3279.7	169.111	132.111	165.111	3279.7	121.111	124.111	136.111	3279.7	169.111	132.111	165.111	3412.7	159.444	191.444	176.444	3372.3	88	84	99	3372.3	85	84	65	3372.3	90	87	99	3372.3	104	110	101	3372.3	6	6	7	3372.3	39	27	30	3372.3	48	48	46	3372.3	7	7	8	3285
	3935.6	191.667	150.667	185.667	3935.6	127.667	126.667	140.667	3935.6	191.667	150.667	185.667	4095.3	167.222	199.222	184.222	4046.8	102.667	98.6667	116.667	4046.8	102.667	103.667	81.6667	4046.8	106.667	102.667	112.667	4046.8	121.667	127.667	121.667	4046.8	6.66667	7.66667	5.66667	4046.8	42.6667	26.6667	33.6667	4046.8	49.6667	48.6667	49.6667	4046.8	5.66667	6.66667	7.66667	3942
	4591.6	213	169	208	4591.6	129	130	145	4591.6	213	169	208	4777.9	176.444	208.444	191.444	4721.2	120.333	117.333	138.333	4721.2	127.333	127.333	99.3333	4721.2	124.333	119.333	133.333	4721.2	140.333	151.333	142.333	4721.2	7.33333	6.33333	8.33333	4721.2	47.3333	33.3333	34.3333	4721.2	53.3333	52.3333	52.3333	4721.2	6.33333	7.33333	8.33333	4599
	5247.5	237.778	188.778	229.778	5247.5	131.778	131.778	146.778	5247.5	237.778	188.778	229.778	5460.4	186	216	202	5395.6	139.333	133.333	160.333	5395.6	151.333	150.333	117.333	5395.6	143.333	137.333	153.333	5395.6	159.333	174.333	165.333	5395.6	7.33333	6.33333	5.33333	5395.6	49.3333	33.3333	35.3333	5395.6	56.3333	53.3333	53.3333	5395.6	10.3333	7.33333	9.33333	5256
	5903.4	264.111	215.111	254.111	5903.4	137.111	135.111	149.111	5903.4	264.111	215.111	254.111	6143	193.667	226.667	209.667	6070	158.5	153.5	181.5	6070	175.5	173.5	135.5	6070	161.5	156.5	175.5	6070	181.5	200.5	185.5	6070	6.5	8.5	8.5	6070	51.5	35.5	39.5	6070	56.5	53.5	53.5	6070	8.5	7.5	9.5	5913
	6559.3	292.667	240.667	281.667	6559.3	139.667	141.667	154.667	6559.3	292.667	240.667	281.667	6825.5	203	234	217	6744.5	179	170	208	6744.5	203	207	157	6744.5	182	177	198	6744.5	204	227	212	6744.5	8	8	7	6744.5	56	39	43	6744.5	59	57	56	6744.5	10	8	10	6570
	7215.2	325	269	310	7215.2	143	146	157	7215.2	325	269	310	7508.1	213.667	247.667	229.667	7418.9	202.667	189.667	234.667	7418.9	236.667	236.667	182.667	7418.9	206.667	198.667	220.667	7418.9	230.667	256.667	241.667	7418.9	8.66667	8.66667	9.66667	7418.9	59.6667	40.6667	45.6667	7418.9	62.6667	60.6667	58.6667	7418.9	9.66667	9.66667	10.6667	7227
	7871.1	357.667	297.667	340.667	7871.1	146.667	148.667	160.667	7871.1	357.667	297.667	340.667	8190.6	228.111	261.111	241.111	8093.3	228.5	215.5	265.5	8093.3	271.5	270.5	210.5	8093.3	231.5	221.5	247.5	8093.3	256.5	285.5	270.5	8093.3	8.5	8.5	8.5	8093.3	61.5	43.5	47.5	8093.3	64.5	61.5	61.5	8093.3	9.5	9.5	9.5	7884
	8527	389.889	332.889	371.889	8527	148.889	149.889	162.889	8527	389.889	332.889	371.889	8873.2	237	271	254	8767.7	254.833	240.833	297.833	8767.7	306.833	304.833	238.833	8767.7	258.833	247.833	277.833	8767.7	288.833	315.833	306.833	8767.7	10.8333	8.83333	9.83333	8767.7	66.8333	45.8333	49.8333	8767.7	67.8333	64.8333	62.8333	8767.7	10.8333	10.8333	11.8333	8541
	9182.9	431.778	365.778	407.778	9182.9	151.778	157.778	167.778	9182.9	431.778	365.778	407.778	9555.7	250.778	283.778	266.778	9442.1	283.667	269.667	328.667	9442.1	343.667	342.667	266.667	9442.1	285.667	279.667	305.667	9442.1	322.667	354.667	341.667	9442.1	9.66667	10.6667	10.6667	9442.1	70.6667	47.6667	53.6667	9442.1	69.6667	66.6667	63.6667	9442.1	11.6667	10.6667	12.6667	9198
	9838.8	465.222	401.222	444.222	9838.8	157.222	161.222	171.222	9838.8	465.222	401.222	444.222	10238.3	264.444	296.444	279.444	10116.6	314.167	304.167	366.167	10116.6	390.167	387.167	303.167	10116.6	321.167	308.167	340.167	10116.6	357.167	396.167	381.167	10116.6	12.1667	11.1667	12.1667	10116.6	74.1667	51.1667	57.1667	10116.6	73.1667	69.1667	67.1667	10116.6	13.1667	13.1667	13.1667	9855
	10494.7	510.111	445.111	482.111	10494.7	163.111	163.111	174.111	10494.7	510.111	445.111	482.111	10920.8	277.556	310.556	294.556	10791	351.167	334.167	411.167	10791	437.167	437.167	338.167	10791	353.167	343.167	377.167	10791	395.167	454.167	425.167	10791	12.1667	12.1667	13.1667	10791	78.1667	54.1667	59.1667	10791	74.1667	71.1667	68.1667	10791	14.1667	13.1667	14.1667	10512
	11150.7	552.667	486.667	525.667	11150.7	165.667	170.667	178.667	11150.7	552.667	486.667	525.667	11603.4	291.556	321.556	309.556	11465.4	389	362	450	11465.4	483	485	379	11465.4	394	381	425	11465.4	446	524	476	11465.4	13	12	12	11465.4	83	56	64	11465.4	78	74	70	11465.4	14	13	14	11169
	11806.6	602.222	539.222	571.222	11806.6	170.222	175.222	184.222	11806.6	602.222	539.222	571.222	12286	305.889	336.889	323.889	12139.9	426	406	496	12139.9	536	539	424	12139.9	434	414	461	12139.9	494	580	540	12139.9	15	14	15	12139.9	88	63	68	12139.9	82	77	75	12139.9	15	15	16	11826
	12462.6	654.333	586.333	616.333	12462.6	177.333	181.333	189.333	12462.6	654.333	586.333	616.333	12968.5	325	352	343	12814.3	473.167	445.167	553.167	12814.3	590.167	588.167	460.167	12814.3	474.167	453.167	503.167	12814.3	540.167	630.167	595.167	12814.3	15.1667	14.1667	16.1667	12814.3	92.1667	69.1667	75.1667	12814.3	84.1667	82.1667	73.1667	12814.3	16.1667	14.1667	17.1667	12483
	13118.5	706.111	648.111	667.111	13118.5	182.111	189.111	193.111	13118.5	706.111	648.111	667.111	13651	339.444	368.444	357.444	13488.7	518.333	490.333	608.333	13488.7	650.333	644.333	508.333	13488.7	523.333	509.333	556.333	13488.7	591.333	690.333	666.333	13488.7	17.3333	15.3333	17.3333	13488.7	101.333	72.3333	81.3333	13488.7	89.3333	82.3333	76.3333	13488.7	17.3333	16.3333	17.3333	13140
	13775.1	762.889	698.889	717.889	13775.1	188.889	195.889	200.889	13775.1	762.889	698.889	717.889	14333.6	357.222	390.222	381.222	14163.1	574.833	553.833	673.833	14163.1	708.833	711.833	562.833	14163.1	574.833	547.833	610.833	14163.1	650.833	736.833	739.833	14163.1	17.8333	16.8333	19.8333	14163.1	107.833	74.8333	84.8333	14163.1	90.8333	86.8333	77.8333	14163.1	17.8333	16.8333	18.8333	13797
	14431	821.556	768.556	772.556	14431	194.556	202.556	204.556	14431	821.556	768.556	772.556	15016.2	373.444	406.444	392.444	14837.6	636	610	737	14837.6	772	789	621	14837.6	638	594	653	14837.6	722	803	835	14837.6	19	19	21	14837.6	112	78	86	14837.6	95	88	83	14837.6	19	18	22	14454
	15086.9	889.333	844.333	832.333	15086.9	202.333	209.333	211.333	15086.9	889.333	844.333	832.333	15698.7	388.889	427.889	409.889	15512	694.333	675.333	792.333	15512	844.333	881.333	672.333	15512	699.333	642.333	709.333	15512	790.333	870.333	920.333	15512	22.3333	19.3333	21.3333	15512	114.333	82.3333	90.3333	15512	99.3333	88.3333	89.3333	15512	19.3333	21.3333	23.3333	15111
	15742.8	971.111	923.111	897.111	15742.8	210.111	218.111	221.111	15742.8	971.111	923.111	897.111	16381.3	409	458	432	16186.4	759.5	739.5	859.5	16186.4	950.5	965.5	728.5	16186.4	766.5	685.5	752.5	16186.4	887.5	919.5	987.5	16186.4	23.5	21.5	23.5	16186.4	121.5	87.5	97.5	16186.4	104.5	94.5	109.5	16186.4	22.5	19.5	26.5	15768
	16398.7	1040.22	1004.22	968.222	16398.7	218.222	228.222	229.222	16398.7	1040.22	1004.22	968.222	17063.8	429.333	494.333	454.333	16860.8	828.167	804.167	941.167	16860.8	1032.17	1036.17	790.167	16860.8	828.167	745.167	804.167	16860.8	968.167	968.167	1073.17	16860.8	25.1667	22.1667	25.1667	16860.8	125.167	89.1667	102.167	16860.8	113.167	102.167	117.167	16860.8	24.1667	19.1667	23.1667	16425.1
	17054.7	1122	1098	1028	17054.7	230	239	243	17054.7	1122	1098	1028	17746.4	461.333	519.333	468.333	17535.2	885.667	863.667	1006.67	17535.2	1100.67	1090.67	849.667	17535.2	889.667	796.667	857.667	17535.2	1023.67	1029.67	1147.67	17535.2	26.6667	25.6667	28.6667	17535.2	131.667	97.6667	107.667	17535.2	113.667	106.667	117.667	17535.2	24.6667	22.6667	27.6667	17082.1
	17710.6	1194.44	1205.44	1069.44	17710.6	243.444	248.444	259.444	17710.6	1194.44	1205.44	1069.44	18428.9	498.778	529.778	489.778	18209.7	958.667	912.667	1081.67	18209.7	1137.67	1129.67	940.667	18209.7	955.667	866.667	941.667	18209.7	1093.67	1079.67	1231.67	18209.7	29.6667	27.6667	31.6667	18209.7	139.667	102.667	115.667	18209.7	115.667	107.667	112.667	18209.7	28.6667	24.6667	29.6667	17739.1
	18366.5	1304.33	1333.33	1142.33	18366.5	257.333	263.333	274.333	18366.5	1304.33	1333.33	1142.33	19111.5	511.333	537.333	509.333	18884.1	1063.67	962.667	1189.67	18884.1	1178.67	1164.67	1011.67	18884.1	1042.67	951.667	989.667	18884.1	1150.67	1136.67	1312.67	18884.1	32.6667	29.6667	33.6667	18884.1	145.667	107.667	122.667	18884.1	120.667	109.667	106.667	18884.1	28.6667	25.6667	31.6667	18396.1
	19022.4	1456.11	1462.11	1236.11	19022.4	270.111	281.111	287.111	19022.4	1456.11	1462.11	1236.11	19794	521.333	554.333	536.333	19558.5	1130.67	1020.67	1252.67	19558.5	1226.67	1215.67	1072.67	19558.5	1128.67	1014.67	1010.67	19558.5	1224.67	1212.67	1402.67	19558.5	33.6667	30.6667	35.6667	19558.5	151.667	113.667	131.667	19558.5	122.667	112.667	103.667	19558.5	30.6667	26.6667	33.6667	19053.1
	19678.3	1567.11	1549.11	1306.11	19678.3	286.111	310.111	294.111	19678.3	1567.11	1549.11	1306.11	20476.6	541.667	574.667	564.667	20232.9	1143.5	1074.5	1269.5	20232.9	1252.5	1234.5	1100.5	20232.9	1160.5	1045.5	1013.5	20232.9	1302.5	1280.5	1502.5	20232.9	36.5	32.5	37.5	20232.9	159.5	119.5	138.5	20232.9	126.5	115.5	105.5	20232.9	33.5	29.5	34.5	19710.1
	20334.2	1660.33	1624.33	1405.33	20334.2	300.333	333.333	299.333	20334.2	1660.33	1624.33	1405.33	21159.1	557.444	596.444	584.444	20907.4	1190.5	1077.5	1313.5	20907.4	1293.5	1274.5	1140.5	20907.4	1199.5	1085.5	1031.5	20907.4	1358.5	1344.5	1597.5	20907.4	37.5	33.5	40.5	20907.4	168.5	125.5	146.5	20907.4	131.5	121.5	109.5	20907.4	34.5	31.5	37.5	20367.1
	20990.1	1721.89	1693.89	1518.89	20990.1	317.889	356.889	311.889	20990.1	1721.89	1693.89	1518.89	21841.7	583.667	617.667	606.667	21581.8	1224	1111	1329	21581.8	1317	1298	1172	21581.8	1215	1100	1036	21581.8	1422	1419	1682	21581.8	42	37	43	21581.8	177	133	157	21581.8	136	127	114	21581.8	38	33	39	21024.1
	21646	1769.78	1750.78	1613.78	21646	337.778	379.778	321.778	21646	1769.78	1750.78	1613.78	22524.2	606.778	634.778	631.778	22256.2	1247.17	1135.17	1340.17	22256.2	1340.17	1326.17	1187.17	22256.2	1231.17	1114.17	1058.17	22256.2	1500.17	1486.17	1780.17	22256.2	39.1667	37.1667	44.1667	22256.2	186.167	141.167	165.167	22256.2	139.167	128.167	117.167	22256.2	39.1667	35.1667	40.1667	21681.1
	22302	1798.22	1791.22	1702.22	22302	360.222	401.222	338.222	22302	1798.22	1791.22	1702.22	23206.8	632.444	654.444	657.444	22930.6	1283	1179	1368	22930.6	1372	1357	1222	22930.6	1268	1154	1073	22930.6	1602	1556	1886	22930.6	43	40	47	22930.6	192	150	179	22930.6	146	135	121	22930.6	43	38	44	22338.1
	22957.9	1833	1821	1761	22957.9	386	427	349	22957.9	1833	1821	1761	23889.3	660	678	683	23605.1	1310.5	1210.5	1393.5	23605.1	1368.5	1358.5	1225.5	23605.1	1279.5	1167.5	1084.5	23605.1	1671.5	1619.5	1980.5	23605.1	48.5	43.5	50.5	23605.1	201.5	156.5	189.5	23605.1	150.5	138.5	126.5	23605.1	45.5	41.5	47.5	22995.1
	23613.8	1858.44	1855.44	1769.44	23613.8	404.444	451.444	361.444	23613.8	1858.44	1855.44	1769.44	24571.9	688.444	695.444	706.444	24279.5	1345.33	1236.33	1412.33	24279.5	1369.33	1360.33	1225.33	24279.5	1276.33	1162.33	1091.33	24279.5	1715.33	1674.33	2047.33	24279.5	48.3333	43.3333	50.3333	24279.5	210.333	168.333	202.333	24279.5	155.333	142.333	131.333	24279.5	47.3333	43.3333	49.3333	23652.1
	24269.7	1870.11	1896.11	1797.11	24269.7	434.111	477.111	378.111	24269.7	1870.11	1896.11	1797.11	25254.4	710.444	725.444	737.444	24953.9	1364.5	1254.5	1431.5	24953.9	1373.5	1377.5	1234.5	24953.9	1299.5	1183.5	1101.5	24953.9	1788.5	1715.5	2140.5	24953.9	48.5	46.5	52.5	24953.9	220.5	176.5	212.5	24953.9	159.5	146.5	133.5	24953.9	50.5	45.5	52.5	24309.1
	24925.8	1865.33	1921.33	1821.33	24925.8	455.333	509.333	399.333	24925.8	1865.33	1921.33	1821.33	25937	737.222	743.222	762.222	25628.3	1384.67	1277.67	1444.67	25628.3	1343.67	1367.67	1230.67	25628.3	1285.67	1194.67	1104.67	25628.3	1812.67	1751.67	2203.67	25628.3	51.6667	47.6667	53.6667	25628.3	230.667	185.667	226.667	25628.3	163.667	153.667	138.667	25628.3	55.6667	48.6667	55.6667	24966.1
	25581.6	1887.22	1946.22	1848.22	25581.6	483.222	546.222	420.222	25581.6	1887.22	1946.22	1848.22	26619.5	758	771	790	26302.8	1402.67	1295.67	1457.67	26302.8	1348.67	1371.67	1226.67	26302.8	1294.67	1202.67	1103.67	26302.8	1854.67	1793.67	2254.67	26302.8	53.6667	49.6667	56.6667	26302.8	237.667	196.667	239.667	26302.8	168.667	158.667	142.667	26302.8	57.6667	50.6667	57.6667	25623.8
	26237.6	1918.78	1972.78	1870.78	26237.6	514.778	582.778	443.778	26237.6	1918.78	1972.78	1870.78	27302.1	784.889	794.889	815.889	26977.2	1417	1312	1468	26977.2	1355	1382	1229	26977.2	1305	1206	1108	26977.2	1915	1823	2333	26977.2	55	51	58	26977.2	247	206	252	26977.2	172	162	146	26977.2	60	54	59	26280.9
	26893.6	1948.56	1998.56	1893.56	26893.6	533.556	630.556	466.556	26893.6	1948.56	1998.56	1893.56	27984.7	815.444	820.444	846.444	27651.6	1429	1325	1479	27651.6	1358	1371	1233	27651.6	1312	1213	1110	27651.6	1918	1856	2369	27651.6	57	53	59	27651.6	255	217	266	27651.6	177	168	150	27651.6	64	59	63	26937.9
	27549.5	1959.22	2026.22	1921.22	27549.5	566.222	675.222	490.222	27549.5	1959.22	2026.22	1921.22	28668	841.222	846.222	887.222	28326	1442.33	1336.33	1490.33	28326	1362.33	1374.33	1240.33	28326	1325.33	1221.33	1115.33	28326	1951.33	1894.33	2442.33	28326	58.3333	55.3333	61.3333	28326	264.333	226.333	278.333	28326	180.333	173.333	156.333	28326	67.3333	62.3333	66.3333	27594.9
	28205.4	1986.89	2043.89	1938.89	28205.4	598.889	720.889	518.889	28205.4	1986.89	2043.89	1938.89	29350.5	862.333	857.333	909.333	29000.5	1455.5	1350.5	1503.5	29000.5	1371.5	1372.5	1245.5	29000.5	1336.5	1226.5	1118.5	29000.5	1984.5	1919.5	2452.5	29000.5	58.5	55.5	63.5	29000.5	274.5	238.5	291.5	29000.5	185.5	179.5	160.5	29000.5	70.5	66.5	68.5	28251.9
	28861.4	2003.67	2066.67	1946.67	28861.4	634.667	768.667	545.667	28861.4	2003.67	2066.67	1946.67	30033.1	889.333	880.333	941.333	29674.9	1464.17	1357.17	1511.17	29674.9	1368.17	1358.17	1246.17	29674.9	1337.17	1232.17	1120.17	29674.9	1974.17	1938.17	2491.17	29674.9	61.1667	58.1667	65.1667	29674.9	282.167	249.167	305.167	29674.9	190.167	183.167	166.167	29674.9	73.1667	68.1667	73.1667	28908.9
	29517.4	2005.56	2091.56	1966.56	29517.4	675.556	822.556	574.556	29517.4	2005.56	2091.56	1966.56	30715.6	917.778	903.778	967.778	30349.3	1471.33	1367.33	1520.33	30349.3	1371.33	1332.33	1252.33	30349.3	1342.33	1234.33	1118.33	30349.3	2007.33	1941.33	2526.33	30349.3	62.3333	58.3333	66.3333	30349.3	290.333	259.333	315.333	30349.3	191.333	188.333	170.333	30349.3	76.3333	71.3333	75.3333	29565.9
	30173.3	2005.22	2096.22	1981.22	30173.3	719.222	880.222	608.222	30173.3	2005.22	2096.22	1981.22	31398.2	942.778	923.778	996.778	31023.7	1484.83	1372.83	1526.83	31023.7	1376.83	1325.83	1255.83	31023.7	1351.83	1237.83	1122.83	31023.7	2044.83	1974.83	2535.83	31023.7	63.8333	61.8333	66.8333	31023.7	297.833	266.833	327.833	31023.7	196.833	192.833	174.833	31023.7	77.8333	75.8333	75.8333	30222.9
	30829.2	2027.11	2112.11	1999.11	30829.2	772.111	931.111	641.111	30829.2	2027.11	2112.11	1999.11	32080.7	963.444	934.444	1015.44	31698.9	1493.17	1380.17	1537.17	31698.9	1385.17	1332.17	1261.17	31698.9	1356.17	1245.17	1118.17	31698.9	2076.17	1971.17	2565.17	31698.9	65.1667	61.1667	70.1667	31698.9	306.167	278.167	341.167	31698.9	199.167	198.167	180.167	31698.9	82.1667	78.1667	80.1667	30879.9
	31485.1	2045.89	2103.89	2001.89	31485.1	816.889	990.889	673.889	31485.1	2045.89	2103.89	2001.89	32763.3	973.667	939.667	1022.67	32373.3	1494.83	1381.83	1536.83	32373.3	1377.83	1327.83	1258.83	32373.3	1357.83	1239.83	1112.83	32373.3	2064.83	1951.83	2557.83	32373.3	65.8333	62.8333	70.8333	32373.3	315.833	287.833	352.833	32373.3	201.833	201.833	183.833	32373.3	85.8333	82.8333	82.8333	31536.9
	32141	2064.11	2114.11	1999.11	32141	877.111	1049.11	709.111	32141	2064.11	2114.11	1999.11	33445.8	991.667	946.667	1040.67	33047.7	1505.33	1388.33	1546.33	33047.7	1375.33	1333.33	1262.33	33047.7	1363.33	1247.33	1113.33	33047.7	2111.33	1954.33	2601.33	33047.7	68.3333	64.3333	73.3333	33047.7	322.333	297.333	366.333	33047.7	207.333	207.333	189.333	33047.7	89.3333	86.3333	85.3333	32193.9
	32796.9	2082.78	2141.78	1999.78	32796.9	930.778	1105.78	745.778	32796.9	2082.78	2141.78	1999.78	34128.4	1014	970	1067	33722.1	1508.17	1400.17	1548.17	33722.1	1379.17	1330.17	1264.17	33722.1	1363.17	1245.17	1112.17	33722.1	2141.17	1965.17	2576.17	33722.1	69.1667	65.1667	76.1667	33722.1	330.167	308.167	376.167	33722.1	210.167	213.167	194.167	33722.1	91.1667	87.1667	87.1667	32850.9
	33452.8	2102.78	2154.78	1989.78	33452.8	990.778	1164.78	785.778	33452.8	2102.78	2154.78	1989.78	34811	1023.44	973.444	1083.44	34396.6	1515.67	1411.67	1555.67	34396.6	1378.67	1330.67	1264.67	34396.6	1364.67	1241.67	1108.67	34396.6	2171.67	1979.67	2571.67	34396.6	72.6667	67.6667	76.6667	34396.6	335.667	318.667	385.667	34396.6	213.667	216.667	197.667	34396.6	93.6667	91.6667	90.6667	33507.9
	34108.9	2120.44	2171.44	1999.44	34108.9	1039.44	1222.44	821.444	34108.9	2120.44	2171.44	1999.44	35493.5	1038.33	992.333	1105.33	35071	1517	1424	1553	35071	1379	1331	1267	35071	1365	1242	1102	35071	2183	1987	2610	35071	71	69	77	35071	342	326	398	35071	216	220	203	35071	96	94	92	34164.9
	34764.7	2134.67	2197.67	2027.67	34764.7	1095.67	1275.67	856.667	34764.7	2134.67	2197.67	2027.67	36176	1054.78	1001.78	1110.78	35745.4	1526.67	1434.67	1561.67	35745.4	1379.67	1331.67	1267.67	35745.4	1365.67	1235.67	1096.67	35745.4	2198.67	2014.67	2583.67	35745.4	73.6667	68.6667	79.6667	35745.4	348.667	333.667	405.667	35745.4	218.667	224.667	206.667	35745.4	98.6667	97.6667	96.6667	34821.9
	35420.7	2156.11	2217.11	2039.11	35420.7	1147.11	1329.11	900.111	35420.7	2156.11	2217.11	2039.11	36858.6	1068.67	1017.67	1133.67	36419.8	1529.67	1444.67	1559.67	36419.8	1377.67	1328.67	1259.67	36419.8	1363.67	1239.67	1095.67	36419.8	2180.67	1999.67	2548.67	36419.8	74.6667	69.6667	79.6667	36419.8	355.667	341.667	416.667	36419.8	220.667	228.667	209.667	36419.8	101.667	100.667	96.6667	35478.9
	36076.6	2176.44	2231.44	2049.44	36076.6	1208.44	1377.44	934.444	36076.6	2176.44	2231.44	2049.44	37541.2	1082.89	1027.89	1139.89	37094.3	1538.17	1431.17	1576.17	37094.3	1378.17	1332.17	1261.17	37094.3	1365.17	1245.17	1093.17	37094.3	2240.17	2022.17	2582.17	37094.3	76.1667	72.1667	81.1667	37094.3	362.167	351.167	427.167	37094.3	223.167	232.167	213.167	37094.3	104.167	103.167	100.167	36135.9
	36732.5	2190.44	2235.44	2060.44	36732.5	1248.44	1423.44	970.444	36732.5	2190.44	2235.44	2060.44	38223.7	1082	1029	1149	37768.7	1542.5	1424.5	1582.5	37768.7	1374.5	1329.5	1260.5	37768.7	1368.5	1243.5	1088.5	37768.7	2248.5	2015.5	2601.5	37768.7	77.5	72.5	82.5	37768.7	370.5	359.5	438.5	37768.7	227.5	234.5	217.5	37768.7	107.5	107.5	103.5	36792.9
	37388.4	2195.44	2245.44	2072.44	37388.4	1298.44	1472.44	1008.44	37388.4	2195.44	2245.44	2072.44	38906.3	1091.67	1033.67	1155.67	38443.1	1549.83	1455.83	1588.83	38443.1	1371.83	1319.83	1258.83	38443.1	1368.83	1240.83	1080.83	38443.1	2243.83	1996.83	2581.83	38443.1	80.8333	73.8333	85.8333	38443.1	374.833	365.833	444.833	38443.1	228.833	237.833	221.833	38443.1	109.833	107.833	104.833	37449.9
	38044.3	2212	2265	2075	38044.3	1338	1524	1047	38044.3	2212	2265	2075	39588.8	1095.67	1047.67	1165.67	39117.5	1544.5	1436.5	1591.5	39117.5	1365.5	1319.5	1250.5	39117.5	1367.5	1236.5	1074.5	39117.5	2256.5	2014.5	2622.5	39117.5	80.5	74.5	85.5	39117.5	381.5	373.5	450.5	39117.5	229.5	242.5	223.5	39117.5	111.5	111.5	107.5	38106.9
	38700.2	2218.56	2275.56	2096.56	38700.2	1377.56	1567.56	1086.56	38700.2	2218.56	2275.56	2096.56	40271.4	1070.22	1058.22	1169.22	39792	1551.33	1454.33	1600.33	39792	1368.33	1319.33	1250.33	39792	1364.33	1232.33	1070.33	39792	2255.33	2022.33	2649.33	39792	82.3333	75.3333	86.3333	39792	384.333	382.333	459.333	39792	231.333	245.333	224.333	39792	113.333	114.333	109.333	38763.9
	39356.1	2215.11	2279.11	2091.11	39356.1	1405.11	1600.11	1111.11	39356.1	2215.11	2279.11	2091.11	40953.9	1036	1059	1165	40466.4	1558.83	1445.83	1609.83	40466.4	1367.83	1315.83	1246.83	40466.4	1367.83	1231.83	1061.83	40466.4	2274.83	2125.83	2699.83	40466.4	82.8333	75.8333	88.8333	40466.4	393.833	387.833	465.833	40466.4	232.833	246.833	228.833	40466.4	116.833	115.833	112.833	39420.9
	40012	2237.78	2288.78	2097.78	40012	1441.78	1628.78	1145.78	40012	2237.78	2288.78	2097.78	41636.5	1048.33	1049.33	1174.33	41140.8	1555.17	1441.17	1608.17	41140.8	1366.17	1307.17	1235.17	41140.8	1363.17	1220.17	1053.17	41140.8	2270.17	2018.17	2714.17	41140.8	83.1667	77.1667	90.1667	41140.8	395.167	396.167	472.167	41140.8	234.167	247.167	231.167	41140.8	119.167	117.167	112.167	40077.9
	40668	2237.11	2299.11	2107.11	40668	1469.11	1673.11	1178.11	40668	2237.11	2299.11	2107.11	42319	1052.11	1055.11	1174.11	41815.2	1553.33	1454.33	1611.33	41815.2	1360.33	1306.33	1234.33	41815.2	1356.33	1223.33	1051.33	41815.2	2241.33	2011.33	2699.33	41815.2	84.3333	78.3333	91.3333	41815.2	399.333	402.333	477.333	41815.2	233.333	251.333	233.333	41815.2	121.333	120.333	115.333	40734.9
	41323.9	2254.33	2314.33	2124.33	41323.9	1506.33	1706.33	1217.33	41323.9	2254.33	2314.33	2124.33	43001.6	1066.89	1048.89	1184.89	42489.7	1564	1456	1616	42489.7	1363	1308	1231	42489.7	1360	1220	1041	42489.7	2191	2084	2689	42489.7	85	80	92	42489.7	404	407	485	42489.7	236	254	235	42489.7	124	123	117	41391.9
	41979.8	2263.89	2318.89	2119.89	41979.8	1535.89	1741.89	1246.89	41979.8	2263.89	2318.89	2119.89	43684.1	1076.22	1032.22	1185.22	43164.1	1559.83	1460.83	1618.83	43164.1	1356.83	1303.83	1227.83	43164.1	1348.83	1206.83	1031.83	43164.1	2182.83	2008.83	2718.83	43164.1	87.8333	79.8333	92.8333	43164.1	408.833	410.833	492.833	43164.1	235.833	253.833	236.833	43164.1	126.833	124.833	119.833	42048.9
	42635.7	2261.67	2322.67	2122.67	42635.7	1548.67	1767.67	1273.67	42635.7	2261.67	2322.67	2122.67	44366.7	1079.78	1007.78	1187.78	43838.5	1561.17	1488.17	1619.17	43838.5	1349.17	1304.17	1226.17	43838.5	1350.17	1207.17	1031.17	43838.5	2195.17	2030.17	2693.17	43838.5	87.1667	81.1667	96.1667	43838.5	409.167	418.167	500.167	43838.5	238.167	257.167	239.167	43838.5	126.167	127.167	121.167	42705.9
	43291.6	2264.33	2322.33	2127.33	43291.6	1569.33	1795.33	1305.33	43291.6	2264.33	2322.33	2127.33	45049.3	1082.11	992.111	1181.11	44512.9	1573.5	1450.5	1629.5	44512.9	1349.5	1306.5	1227.5	44512.9	1355.5	1203.5	1024.5	44512.9	2211.5	2023.5	2705.5	44512.9	89.5	82.5	95.5	44512.9	415.5	423.5	502.5	44512.9	237.5	258.5	239.5	44512.9	130.5	131.5	124.5	43362.9
	43947.5	2274.89	2326.89	2129.89	43947.5	1589.89	1813.89	1334.89	43947.5	2274.89	2326.89	2129.89	45731.8	1086.89	998.889	1168.89	45187.3	1569.67	1449.67	1621.67	45187.3	1352.67	1304.67	1222.67	45187.3	1345.67	1196.67	1017.67	45187.3	2204.67	2021.67	2728.67	45187.3	90.6667	82.6667	96.6667	45187.3	420.667	429.667	511.667	45187.3	237.667	258.667	241.667	45187.3	130.667	131.667	124.667	44019.9
	44603.4	2280.11	2335.11	2129.11	44603.4	1606.11	1832.11	1364.11	44603.4	2280.11	2335.11	2129.11	46414.3	1095	1006	1106	45861.8	1563.83	1447.83	1619.83	45861.8	1346.83	1308.83	1220.83	45861.8	1340.83	1192.83	1007.83	45861.8	2220.83	2004.83	2704.83	45861.8	91.8333	83.8333	98.8333	45861.8	420.833	433.833	517.833	45861.8	236.833	260.833	241.833	45861.8	134.833	133.833	127.833	44676.9
	45259.3	2273.22	2334.22	2129.22	45259.3	1632.22	1852.22	1390.22	45259.3	2273.22	2334.22	2129.22	47096.9	1097.33	1006.33	1104.33	46536.2	1571.67	1439.67	1619.67	46536.2	1343.67	1298.67	1216.67	46536.2	1335.67	1187.67	996.667	46536.2	2211.67	2085.67	2689.67	46536.2	92.6667	85.6667	99.6667	46536.2	421.667	437.667	523.667	46536.2	238.667	263.667	243.667	46536.2	136.667	135.667	129.667	45333.9
	45915.2	2275	2331	2132	45915.2	1656	1876	1419	45915.2	2275	2331	2132	47779.5	1095.56	1001.56	1099.56	47210.6	1572.33	1451.33	1625.33	47210.6	1342.33	1297.33	1221.33	47210.6	1343.33	1192.33	992.333	47210.6	2220.33	2099.33	2646.33	47210.6	95.3333	85.3333	100.333	47210.6	428.333	446.333	532.333	47210.6	240.333	266.333	245.333	47210.6	139.333	139.333	132.333	45990.9
	46571.1	2272.56	2333.56	2134.56	46571.1	1663.56	1883.56	1439.56	46571.1	2272.56	2333.56	2134.56	48462	1101.56	1006.56	1096.56	47885	1572.5	1454.5	1622.5	47885	1336.5	1290.5	1213.5	47885	1329.5	1185.5	983.5	47885	2228.5	1994.5	2642.5	47885	95.5	85.5	101.5	47885	429.5	447.5	533.5	47885	239.5	265.5	245.5	47885	140.5	139.5	133.5	46647.9
	47227	2279	2344	2134	47227	1682	1899	1461	47227	2279	2344	2134	49144.6	1101.11	1006.11	1105.11	48559.5	1569	1440	1638	48559.5	1328	1288	1209	48559.5	1332	1177	980	48559.5	2225	2001	2609	48559.5	96	88	103	48559.5	435	455	541	48559.5	241	266	246	48559.5	143	142	134	47304.9
	47883	2275.78	2340.78	2134.78	47883	1694.78	1912.78	1481.78	47883	2275.78	2340.78	2134.78	49827.1	1100.56	1008.56	1103.56	49233.9	1577.5	1432.5	1643.5	49233.9	1324.5	1283.5	1208.5	49233.9	1324.5	1166.5	974.5	49233.9	2216.5	2085.5	2616.5	49233.9	96.5	88.5	102.5	49233.9	433.5	459.5	546.5	49233.9	241.5	270.5	248.5	49233.9	144.5	142.5	137.5	47961.9
	48538.9	2280	2343	2145	48538.9	1696	1930	1498	48538.9	2280	2343	2145	50509.7	1096.67	1003.67	1102.67	49908.3	1557.67	1430.67	1638.67	49908.3	1321.67	1277.67	1197.67	49908.3	1315.67	1163.67	966.667	49908.3	2231.67	1982.67	2569.67	49908.3	97.6667	87.6667	103.667	49908.3	435.667	462.667	548.667	49908.3	238.667	269.667	246.667	49908.3	144.667	144.667	138.667	48618.9
	49194.8	2273	2338	2144	49194.8	1711	1941	1520	49194.8	2273	2338	2144	51192.2	1100.22	1013.22	1110.22	50582.7	1567.83	1426.83	1635.83	50582.7	1315.83	1275.83	1201.83	50582.7	1317.83	1157.83	954.833	50582.7	2223.83	1963.83	2564.83	50582.7	98.8333	89.8333	104.833	50582.7	438.833	462.833	554.833	50582.7	241.833	270.833	248.833	50582.7	147.833	146.833	139.833	49275.9
	49850.8	2275.22	2339.22	2136.22	49850.8	1726.22	1947.22	1532.22	49850.8	2275.22	2339.22	2136.22	51874.8	1105.11	1015.11	1112.11	51257.2	1567	1427	1634	51257.2	1312	1273	1200	51257.2	1316	1158	951	51257.2	2236	1983	2537	51257.2	98	90	107	51257.2	440	470	563	51257.2	241	273	249	51257.2	150	149	142	49932.9
	50506.8	2263.33	2337.33	2132.33	50506.8	1728.33	1963.33	1553.33	50506.8	2263.33	2337.33	2132.33	52557.3	1102.89	1020.89	1112.89	51931.6	1567.83	1439.83	1642.83	51931.6	1312.83	1269.83	1198.83	51931.6	1304.83	1149.83	943.833	51931.6	2251.83	1973.83	2519.83	51931.6	100.833	90.8333	107.833	51931.6	445.833	476.833	569.833	51931.6	244.833	272.833	249.833	51931.6	151.833	149.833	143.833	50589.9
	51162.7	2263.11	2335.11	2139.11	51162.7	1753.11	1980.11	1572.11	51162.7	2263.11	2335.11	2139.11	53239.9	1100.56	1014.56	1107.56	52606	1563	1430	1634	52606	1311	1270	1186	52606	1302	1147	938	52606	2224	1973	2457	52606	99	90	107	52606	445	478	569	52606	244	273	248	52606	152	151	144	51246.9
	51818.6	2267.11	2339.11	2140.11	51818.6	1756.11	1992.11	1586.11	51818.6	2267.11	2339.11	2140.11	53922.4	1095.33	1018.33	1106.33	53280.4	1568.33	1433.33	1636.33	53280.4	1303.33	1265.33	1183.33	53280.4	1306.33	1148.33	932.333	53280.4	2248.33	1991.33	2467.33	53280.4	101.333	91.3333	108.333	53280.4	447.333	485.333	577.333	53280.4	245.333	274.333	249.333	53280.4	156.333	154.333	147.333	51903.9
	52474.5	2263.11	2336.11	2135.11	52474.5	1772.11	1992.11	1596.11	52474.5	2263.11	2336.11	2135.11	54605	1109.33	1016.33	1113.33	53954.9	1576.33	1422.33	1639.33	53954.9	1296.33	1259.33	1178.33	53954.9	1311.33	1145.33	920.333	53954.9	2243.33	1969.33	2447.33	53954.9	102.333	91.3333	110.333	53954.9	452.333	484.333	578.333	53954.9	247.333	274.333	249.333	53954.9	159.333	158.333	149.333	52560.9
	53131.2	2259.11	2333.11	2140.11	53131.2	1782.11	2016.11	1616.11	53131.2	2259.11	2333.11	2140.11	55287.5	1102.56	1018.56	1112.56	54629.3	1578.83	1412.83	1645.83	54629.3	1300.83	1261.83	1175.83	54629.3	1308.83	1151.83	919.833	54629.3	2255.83	1962.83	2428.83	54629.3	102.833	93.8333	111.833	54629.3	453.833	490.833	587.833	54629.3	244.833	277.833	249.833	54629.3	161.833	160.833	152.833	53217.9
	53787.1	2260.44	2331.44	2141.44	53787.1	1787.44	2008.44	1625.44	53787.1	2260.44	2331.44	2141.44	55970.1	1100.56	1026.56	1111.56	55303.7	1567.5	1420.5	1652.5	55303.7	1298.5	1257.5	1170.5	55303.7	1296.5	1129.5	911.5	55303.7	2253.5	1973.5	2436.5	55303.7	103.5	93.5	112.5	55303.7	455.5	493.5	590.5	55303.7	245.5	276.5	249.5	55303.7	162.5	160.5	154.5	53874.9
	54443	2257.11	2327.11	2146.11	54443	1789.11	2033.11	1627.11	54443	2257.11	2327.11	2146.11	56652.6	1101.67	1019.67	1113.67	55978.2	1563.33	1412.33	1645.33	55978.2	1285.33	1247.33	1161.33	55978.2	1285.33	1129.33	901.333	55978.2	2256.33	2002.33	2436.33	55978.2	104.333	93.3333	114.333	55978.2	457.333	498.333	600.333	55978.2	247.333	277.333	248.333	55978.2	165.333	164.333	157.333	54531.9
	55098.9	2245.22	2323.22	2140.22	55098.9	1792.22	2035.22	1639.22	55098.9	2245.22	2323.22	2140.22	57335.2	1105.89	1020.89	1112.89	56652.6	1566.83	1408.83	1647.83	56652.6	1281.83	1237.83	1162.83	56652.6	1279.83	1125.83	890.833	56652.6	2256.83	1975.83	2436.83	56652.6	105.833	95.8333	113.833	56652.6	461.833	495.833	596.833	56652.6	249.833	278.833	246.833	56652.6	166.833	166.833	157.833	55188.9
	55754.8	2245.78	2320.78	2138.78	55754.8	1813.78	2056.78	1650.78	55754.8	2245.78	2320.78	2138.78	58017.7	1109.22	1025.22	1112.22	57327	1565.33	1395.33	1642.33	57327	1277.33	1237.33	1151.33	57327	1287.33	1112.33	882.333	57327	2256.33	1964.33	2418.33	57327	106.333	96.3333	115.333	57327	458.333	498.333	601.333	57327	248.333	279.333	247.333	57327	167.333	167.333	158.333	55845.9
	56410.7	2243.89	2312.89	2132.89	56410.7	1818.89	2053.89	1659.89	56410.7	2243.89	2312.89	2132.89	58700.3	1112.78	1027.78	1119.78	58001.4	1562.83	1397.83	1632.83	58001.4	1265.83	1223.83	1142.83	58001.4	1277.83	1103.83	865.833	58001.4	2261.83	1952.83	2406.83	58001.4	106.833	94.8333	115.833	58001.4	459.833	503.833	612.833	58001.4	244.833	276.833	244.833	58001.4	167.833	170.833	157.833	56502.9
	57066.6	2242	2308	2140	57066.6	1823	2065	1668	57066.6	2242	2308	2140	59382.8	1105.11	1029.11	1117.11	58675.9	1554.67	1386.67	1631.67	58675.9	1265.67	1221.67	1141.67	58675.9	1283.67	1123.67	858.667	58675.9	2245.67	1955.67	2421.67	58675.9	106.667	96.6667	116.667	58675.9	458.667	502.667	612.667	58675.9	248.667	277.667	244.667	58675.9	171.667	172.667	162.667	57159.9
	57722.5	2230.89	2299.89	2128.89	57722.5	1839.89	2073.89	1666.89	57722.5	2230.89	2299.89	2128.89	60065.4	1111.11	1030.11	1124.11	59350.3	1558.67	1381.67	1628.67	59350.3	1259.67	1215.67	1135.67	59350.3	1268.67	1095.67	854.667	59350.3	2252.67	1937.67	2431.67	59350.3	107.667	96.6667	116.667	59350.3	460.667	504.667	613.667	59350.3	247.667	275.667	242.667	59350.3	173.667	175.667	162.667	57816.9
	58378.4	2233.56	2297.56	2131.56	58378.4	1835.56	2083.56	1675.56	58378.4	2233.56	2297.56	2131.56	60747.9	1106.89	1027.89	1122.89	60024.7	1553.17	1378.17	1623.17	60024.7	1250.17	1219.17	1132.17	60024.7	1268.17	1090.17	841.167	60024.7	2246.17	1929.17	2409.17	60024.7	109.167	98.1667	117.167	60024.7	459.167	502.167	616.167	60024.7	247.167	277.167	242.167	60024.7	174.167	178.167	165.167	58473.9
	59034.3	2224.11	2292.11	2122.11	59034.3	1827.11	2082.11	1678.11	59034.3	2224.11	2292.11	2122.11	61430.5	1110.56	1030.56	1129.56	60699.1	1540.17	1372.17	1623.17	60699.1	1252.17	1209.17	1127.17	60699.1	1248.17	1092.17	827.167	60699.1	2246.17	1926.17	2425.17	60699.1	107.167	97.1667	118.167	60699.1	459.167	508.167	621.167	60699.1	248.167	274.167	239.167	60699.1	175.167	179.167	166.167	59130.9
	59690.2	2203.33	2267.33	2105.33	59690.2	1833.33	2076.33	1676.33	59690.2	2203.33	2267.33	2105.33	62113	1105.11	1025.11	1125.11	61373.6	1538.17	1372.17	1622.17	61373.6	1244.17	1204.17	1124.17	61373.6	1243.17	1106.17	819.167	61373.6	2248.17	1919.17	2429.17	61373.6	110.167	98.1667	119.167	61373.6	465.167	509.167	624.167	61373.6	251.167	277.167	239.167	61373.6	178.167	182.167	169.167	59787.9
	60346.1	2197.44	2266.44	2105.44	60346.1	1838.44	2090.44	1678.44	60346.1	2197.44	2266.44	2105.44	62795.6	1107.44	1022.44	1122.44	62048	1539.83	1385.83	1626.83	62048	1231.83	1192.83	1106.83	62048	1272.83	1082.83	798.833	62048	2240.83	1901.83	2411.83	62048	109.833	96.8333	118.833	62048	458.833	506.833	619.833	62048	244.833	272.833	234.833	62048	177.833	181.833	169.833	60444.9
	61002	2196.56	2264.56	2104.56	61002	1848.56	2102.56	1678.56	61002	2196.56	2264.56	2104.56	63478.1	1102.56	1023.56	1125.56	62722.4	1544.33	1354.33	1612.33	62722.4	1234.33	1190.33	1105.33	62722.4	1265.33	1083.33	795.333	62722.4	2242.33	1903.33	2410.33	62722.4	110.333	99.3333	120.333	62722.4	462.333	512.333	627.333	62722.4	253.333	276.333	235.333	62722.4	181.333	183.333	172.333	61101.9
	61658	2192.67	2260.67	2099.67	61658	1850.67	2107.67	1681.67	61658	2192.67	2260.67	2099.67	64160.7	1104.78	1025.78	1124.78	63396.8	1529	1356	1610	63396.8	1224	1187	1094	63396.8	1265	1069	783	63396.8	2239	1897	2424	63396.8	111	99	121	63396.8	467	518	630	63396.8	249	274	234	63396.8	181	186	173	61759
	62313.9	2183.78	2250.78	2091.78	62313.9	1860.78	2121.78	1688.78	62313.9	2183.78	2250.78	2091.78	64843.3	1094.67	1020.67	1124.67	64071.3	1519	1358	1603	64071.3	1216	1183	1092	64071.3	1254	1068	772	64071.3	2251	1895	2424	64071.3	110	99	120	64071.3	463	515	635	64071.3	249	274	231	64071.3	184	187	173	62416
	62969.8	2172.89	2238.89	2085.89	62969.8	1867.89	2121.89	1681.89	62969.8	2172.89	2238.89	2085.89	65525.8	1094.89	1013.89	1124.89	64745.8	1518.67	1359.67	1598.67	64745.8	1209.67	1168.67	1090.67	64745.8	1244.67	1051.67	759.667	64745.8	2222.67	1884.67	2387.67	64745.8	110.667	99.6667	121.667	64745.8	465.667	518.667	634.667	64745.8	244.667	276.667	229.667	64745.8	186.667	189.667	174.667	63073
	63625.7	2171	2235	2087	63625.7	1868	2123	1680	63625.7	2171	2235	2087	66208.4	1089.44	1011.44	1116.44	65420.2	1508	1356	1599	65420.2	1207	1165	1077	65420.2	1206	1048	749	65420.2	2224	1891	2387	65420.2	111	101	123	65420.2	465	520	636	65420.2	246	275	228	65420.2	185	190	176	63730
	64281.6	2159	2227	2075	64281.6	1859	2126	1685	64281.6	2159	2227	2075	66890.9	1085.56	1010.56	1108.56	66094.6	1514.33	1365.33	1587.33	66094.6	1197.33	1147.33	1072.33	66094.6	1208.33	1056.33	736.333	66094.6	2211.33	1901.33	2402.33	66094.6	111.333	100.333	122.333	66094.6	465.333	520.333	635.333	66094.6	248.333	275.333	225.333	66094.6	188.333	192.333	179.333	64387
	64937.5	2144.89	2212.89	2059.89	64937.5	1859.89	2131.89	1684.89	64937.5	2144.89	2212.89	2059.89	67573.5	1078.44	1006.44	1114.44	66769.1	1501.33	1370.33	1583.33	66769.1	1185.33	1149.33	1067.33	66769.1	1212.33	1034.33	720.333	66769.1	2203.33	1850.33	2394.33	66769.1	112.333	100.333	122.333	66769.1	466.333	521.333	639.333	66769.1	244.333	273.333	223.333	66769.1	187.333	193.333	178.333	65044.7
	65593.4	2134.56	2208.56	2050.56	65593.4	1866.56	2124.56	1677.56	65593.4	2134.56	2208.56	2050.56	68256	1071.11	1000.11	1105.11	67443.5	1496.5	1359.5	1535.5	67443.5	1176.5	1140.5	1058.5	67443.5	1204.5	1041.5	711.5	67443.5	2190.5	1832.5	2381.5	67443.5	112.5	101.5	122.5	67443.5	466.5	523.5	636.5	67443.5	248.5	276.5	221.5	67443.5	190.5	195.5	178.5	65701.7
													68938.6	1062.11	992.111	1098.11	68117.9	1492	1362	1575	68117.9	1181	1137	1054	68117.9	1186	1022	695	68117.9	2191	1817	2355	68117.9	112	102	123	68117.9	471	525	644	68117.9	243	274	218	68117.9	191	199	181	66358.7
													69621.8	1053.22	985.222	1095.22	68792.3	1488	1358	1572	68792.3	1170	1134	1053	68792.3	1173	1022	684	68792.3	2187	1818	2343	68792.3	112	102	124	68792.3	467	523	651	68792.3	246	273	216	68792.3	194	200	185	67015.7
													70304.4	1046.33	985.333	1087.33	69466.8	1488	1327	1571	69466.8	1176	1122	1042	69466.8	1179	1020	669	69466.8	2187	1794	2356	69466.8	113	103	125	69466.8	470	530	655	69466.8	245	274	214	69466.8	197	203	186	67672.7
													70986.9	1043.67	981.667	1082.67	70141.2	1484	1316	1564	70141.2	1162	1126	1038	70141.2	1212	1008	658	70141.2	2183	1866	2365	70141.2	114	102	125	70141.2	471	530	649	70141.2	241	273	212	70141.2	197	203	187	68329.7
													71669.5	1034.78	971.778	1074.78	70815.7	1472	1314	1561	70815.7	1152	1110	1031	70815.7	1150	966	640	70815.7	2178	1800	2349	70815.7	113	103	125	70815.7	471	536	651	70815.7	239	269	206	70815.7	198	205	188	68986.7
													72352	1031.56	972.556	1068.56	71490.1	1469.67	1337.67	1500.67	71490.1	1148.67	1106.67	1030.67	71490.1	1176.67	993.667	623.667	71490.1	2170.67	1778.67	2334.67	71490.1	114.667	102.667	125.667	71490.1	471.667	529.667	652.667	71490.1	238.667	270.667	206.667	71490.1	200.667	206.667	188.667	69643.7
													73034.6	1021.67	964.667	1066.67	72165.3	1456.33	1297.33	1492.33	72165.3	1138.33	1099.33	1014.33	72165.3	1176.33	978.333	604.333	72165.3	2156.33	1771.33	2332.33	72165.3	113.333	101.333	125.333	72165.3	473.333	531.333	652.333	72165.3	246.333	269.333	202.333	72165.3	201.333	210.333	191.333	70300.7
													73717.2	1020.67	967.667	1060.67	72839.7	1454.67	1296.67	1479.67	72839.7	1127.67	1093.67	1016.67	72839.7	1141.67	968.667	587.667	72839.7	2142.67	1767.67	2329.67	72839.7	112.667	103.667	125.667	72839.7	472.667	533.667	659.667	72839.7	239.667	268.667	197.667	72839.7	202.667	209.667	192.667	70957.7
													74399.7	1016.22	958.222	1060.22	73514.1	1450	1303	1480	73514.1	1125	1079	1005	73514.1	1202	958	569	73514.1	2099	1754	2257	73514.1	114	102	125	73514.1	470	529	651	73514.1	235	265	196	73514.1	204	212	192	71614.7
													75082.3	1010.56	955.556	1051.56	74188.6	1437.17	1329.17	1473.17	74188.6	1117.17	1071.17	1004.17	74188.6	1158.17	928.167	546.167	74188.6	2064.17	1748.17	2213.17	74188.6	115.167	103.167	126.167	74188.6	473.167	538.167	653.167	74188.6	242.167	265.167	192.167	74188.6	205.167	215.167	195.167	72271.7
													75764.8	1000.22	955.222	1045.22	74863	1435	1287	1524	74863	1110	1067	991	74863	1151	910	526	74863	2048	1729	2191	74863	115	104	127	74863	473	536	662	74863	239	263	187	74863	207	217	197	72928.7
													76447.4	983.222	942.222	1037.22	75537.4	1419.83	1277.83	1465.83	75537.4	1096.83	1056.83	978.833	75537.4	1110.83	894.833	496.833	75537.4	2037.83	1740.83	2178.83	75537.4	113.833	102.833	126.833	75537.4	470.833	533.833	657.833	75537.4	232.833	261.833	182.833	75537.4	207.833	216.833	195.833	73585.7
													77129.9	981.222	932.222	1030.22	76211.9	1407	1267	1510	76211.9	1086	1042	977	76211.9	1069	892	476	76211.9	2009	1709	2153	76211.9	114	102	127	76211.9	469	535	656	76211.9	231	259	180	76211.9	208	219	199	74242.7
													77812.5	971.444	928.444	1019.44	76886.3	1403.67	1263.67	1440.67	76886.3	1077.67	1027.67	972.667	76886.3	1142.67	863.667	448.667	76886.3	2001.67	1708.67	2130.67	76886.3	113.667	102.667	124.667	76886.3	476.667	529.667	653.667	76886.3	233.667	255.667	175.667	76886.3	208.667	219.667	198.667
													78495	961.556	920.556	1008.56	77560.7	1396.67	1259.67	1421.67	77560.7	1070.67	1008.67	946.667	77560.7	1079.67	875.667	418.667	77560.7	1982.67	1694.67	2092.67	77560.7	110.667	101.667	124.667	77560.7	472.667	533.667	656.667	77560.7	229.667	252.667	169.667	77560.7	211.667	222.667	200.667
													79177.6	953.889	910.889	1005.89	78235.3	1381	1230	1422	78235.3	1052	993	945	78235.3	1057	866	391	78235.3	1950	1674	2067	78235.3	111	101	122	78235.3	469	536	650	78235.3	224	251	166	78235.3	211	224	201
													79860.1	942.333	901.333	995.333	78909.7	1367.17	1240.17	1407.17	78909.7	1037.17	985.167	932.167	78909.7	1029.17	810.167	358.167	78909.7	1932.17	1620.17	2039.17	78909.7	110.167	102.167	124.167	78909.7	473.167	524.167	646.167	78909.7	220.167	247.167	161.167	78909.7	212.167	225.167	202.167
													80542.7	934.889	891.889	985.889	79584.1	1357.5	1253.5	1396.5	79584.1	1024.5	970.5	914.5	79584.1	1052.5	752.5	327.5	79584.1	1893.5	1596.5	2006.5	79584.1	108.5	101.5	122.5	79584.1	469.5	524.5	651.5	79584.1	224.5	245.5	157.5	79584.1	211.5	224.5	202.5
													81225.2	917.889	883.889	971.889	80258.6	1354.33	1196.33	1382.33	80258.6	1007.33	954.333	907.333	80258.6	1040.33	797.333	294.333	80258.6	1875.33	1581.33	1984.33	80258.6	109.333	101.333	121.333	80258.6	461.333	523.333	647.333	80258.6	215.333	241.333	152.333	80258.6	213.333	225.333	203.333
													81907.8	912.889	874.889	963.889
													82590.3	899.778	866.778	950.778
													83272.9	888.778	855.778	939.778
													83955.4	880.778	846.778	926.778
													84638	864.778	836.778	917.778
													85320.5	859.889	836.889	913.889
													86003.1	849.111	826.111	904.111
													86685.6	833	814	890
													87368.2	822.778	806.778	879.778
													88050.7	809.333	799.333	874.333
													88733.3	795.667	786.667	859.667
													89415.9	782	779	852
													90098.4	768.111	771.111	834.111
													90781	760.556	761.556	827.556
													91463.5	742.556	749.556	815.556
													92146.1	731.111	739.111	803.111
													92828.6	714	732	790
													93511.2	698.333	722.333	779.333
													94193.7	684.222	707.222	767.222
													94876.3	668.111	702.111	752.111
													95558.8	652.333	689.333	743.333
													96241.4	636.889	677.889	725.889
													96924	622	666	714
													97606.5	608.111	657.111	702.111
													98289.1	591.333	644.333	689.333
													98971.6	578.778	633.778	672.778
													99654.2	561.667	619.667	661.667
													100337	546.111	609.111	644.111
													101019	534.889	595.889	631.889
													101702	524.111	586.111	619.111
													102384	508.667	570.667	602.667
													103067	497.222	561.222	587.222
													103750	478.222	545.222	573.222
													104432	467.778	534.778	558.778
													105115	453.111	523.111	545.111
													105797	439.889	507.889	531.889
													106480	425.556	496.556	521.556
													107162	412.667	488.667	509.667
													107845	400.556	475.556	497.556
													108527	386.778	462.778	485.778
													109210	371	455	474
													109892	356.778	443.778	461.778
													110576	340.556	431.556	450.556
													111258	324.333	417.333	437.333
													111941	308.111	407.111	426.111
													112623	293	395	414
													113306	276.444	382.444	402.444
													113989	262.111	372.111	390.111
													114671	247.889	360.889	380.889
													115354	231.889	346.889	366.889
													116036	214.444	334.444	354.444
													116719	197.556	320.556	342.556
													117401	182.222	308.222	329.222
													118084	163.667	291.667	313.667
													118766	145.222	278.222	302.222
													119449	130.444	265.444	288.444
													120132	112.111	250.111	274.111
													120814	97.6667	235.667	262.667
													121497	82.5556	218.556	245.556
													122179	70.8889	200.889	228.889
													122862	61.8889	185.889	215.889
													123544	52.7778	170.778	201.778
													124227	45.2222	155.222	186.222
													124910	36.4444	138.444	171.444
													125592	31.3333	123.333	157.333
													126275	26.6667	110.667	141.667
													126957	21.4444	94.4444	128.444
													127640	21.1111	83.1111	116.111
													128322	22.2222	71.2222	103.222
													129005	24.2222	61.2222	90.2222
													129688	26.2222	50.2222	75.2222
													130370	25.4444	44.4444	69.4444
													131053	21.7778	36.7778	58.7778
													131735	17.3333	30.3333	49.3333
													132418	14.1111	26.1111	44.1111
													133100	10.8889	19.8889	35.8889
													133783	9.11111	16.1111	30.1111
													134465	8.55556	13.5556	26.5556
													135148	6.55556	11.5556	22.5556
													135830	5.55556	11.5556	20.5556
[truncated: 185 more columns]

## Sheet: OD600
Fig4A	Time [s]	Null-Null_1	Null-Null_2	Null-Null_3	Time [s]	Sa-Null_1	Sa-Null_2	Sa-Null_3	Time [s]	Null-SpyNull_1	Null-SpyNull_2	Null-SpyNull_3	Time [s]	Spy Apo_1	Spy Apo_2	Spy Apo_3	Time [s]	SpyG1_1	SpyG1_2	SpyG1_3	Time [s]	SpyG2_1	SpyG2_2	SpyG2_3	Time [s]	SpyG3_1	SpyG3_2	SpyG3_3	Time [s]	SpyG4_1	SpyG4_2	SpyG4_3	Time [s]	Spy1_1	Spy1_2	Spy1_3	Time [s]	Spy2_1	Spy2_2	Spy2_3	Time [s]	Spy3_1	Spy3_2	Spy3_3	Time [s]	Spy4_1	Spy4_2	Spy4_3	Time [s]
	0	0.065675	0.064175	0.070775	0	0.0655833	0.0595833	0.0653833	0	0.0388444	0.0344444	0.0368444	0	0.0388444	0.0344444	0.0368444	0	0.0245167	0.0282167	0.0268167	0	0.0313167	0.0325167	0.0262167	0	0.0259167	0.0280167	0.0293167	0	0.0280167	0.0252167	0.0259167	0	0.0235167	0.0260167	0.0236167	0	0.0272167	0.0219167	0.0210167	0	0.0222167	0.0242167	0.0285167	0	0.0197167	0.0201167	0.0229167	0
	651.3	0.08965	0.08635	0.09125	694.7	0.07265	0.06545	0.07275	655.9	0.0431556	0.0383556	0.0403556	655.9	0.0431556	0.0383556	0.0403556	674.6	0.0273833	0.0389833	0.0303833	674.6	0.0353833	0.0365833	0.0299833	674.6	0.0290833	0.0309833	0.0346833	674.6	0.0306833	0.0347833	0.0287833	674.6	0.0263833	0.0282833	0.0263833	674.6	0.0307833	0.0237833	0.0254833	674.6	0.0254833	0.0275833	0.0349833	674.6	0.0232833	0.0234833	0.0266833	657
	1302.7	0.089275	0.087975	0.090875	1389.5	0.0750833	0.0695833	0.0771833	1311.8	0.0472556	0.0414556	0.0432556	1311.8	0.0472556	0.0414556	0.0432556	1349.1	0.0303	0.0314	0.0327	1349.1	0.039	0.0388	0.0319	1349.1	0.0325	0.0337	0.0374	1349.1	0.0339	0.04	0.0321	1349.1	0.0296	0.0311	0.0293	1349.1	0.0336	0.0259	0.0269	1349.1	0.0279	0.03	0.0329	1349.1	0.0257	0.0268	0.0316	1314
	1954	0.0911	0.0915	0.0925	2084.2	0.0778333	0.0722333	0.0806333	1967.8	0.0511667	0.0446667	0.0466667	1967.8	0.0511667	0.0446667	0.0466667	2023.5	0.0331833	0.0330833	0.0358833	2023.5	0.0416833	0.0420833	0.0346833	2023.5	0.0353833	0.0373833	0.0407833	2023.5	0.0371833	0.0368833	0.0356833	2023.5	0.0322833	0.0337833	0.0314833	2023.5	0.0367833	0.0278833	0.0294833	2023.5	0.0309833	0.0325833	0.0323833	2023.5	0.0284833	0.0291833	0.0343833	1971
	2605.3	0.091225	0.092025	0.093325	2779	0.0816333	0.0760333	0.0837333	2623.7	0.055	0.0481	0.0496	2623.7	0.055	0.0481	0.0496	2697.9	0.0370167	0.0351167	0.0386167	2697.9	0.0460167	0.0460167	0.0377167	2697.9	0.0385167	0.0406167	0.0446167	2697.9	0.0409167	0.0407167	0.0400167	2697.9	0.0355167	0.0368167	0.0343167	2697.9	0.0407167	0.0305167	0.0324167	2697.9	0.0343167	0.0355167	0.0356167	2697.9	0.0313167	0.0316167	0.0364167	2628
	3256.6	0.09535	0.09655	0.09625	3473.7	0.0853083	0.0797083	0.0870083	3279.7	0.0585	0.053	0.054	3279.7	0.0585	0.053	0.054	3372.3	0.0402833	0.0369833	0.0423833	3372.3	0.0501833	0.0500833	0.0416833	3372.3	0.0421833	0.0445833	0.0485833	3372.3	0.0444833	0.0440833	0.0440833	3372.3	0.0386833	0.0396833	0.0375833	3372.3	0.0440833	0.0326833	0.0352833	3372.3	0.0370833	0.0383833	0.0375833	3372.3	0.0343833	0.0340833	0.0397833	3285
	3908	0.11	0.1088	0.1064	4168.5	0.0881917	0.0820917	0.0895917	3935.6	0.0633333	0.0581333	0.0572333	3935.6	0.0633333	0.0581333	0.0572333	4046.8	0.0446833	0.0421833	0.0464833	4046.8	0.0555833	0.0558833	0.0461833	4046.8	0.0459833	0.0486833	0.0531833	4046.8	0.0488833	0.0477833	0.0484833	4046.8	0.0422833	0.0431833	0.0409833	4046.8	0.0481833	0.0354833	0.0380833	4046.8	0.0401833	0.0416833	0.0399833	4046.8	0.0378833	0.0373833	0.0431833	3942
	4559.3	0.11385	0.11225	0.11155	4863.4	0.09245	0.08615	0.09275	4591.6	0.0679889	0.0616889	0.0621889	4591.6	0.0679889	0.0616889	0.0621889	4721.2	0.0492333	0.0454333	0.0505333	4721.2	0.0607333	0.0616333	0.0505333	4721.2	0.0501333	0.0527333	0.0582333	4721.2	0.0531333	0.0524333	0.0544333	4721.2	0.0462333	0.0460333	0.0449333	4721.2	0.0513333	0.0376333	0.0412333	4721.2	0.0431333	0.0446333	0.0424333	4721.2	0.0406333	0.0399333	0.0464333	4599
	5210.6	0.1134	0.1126	0.1128	5558.2	0.095475	0.088875	0.095575	5247.5	0.0730889	0.0669889	0.0668889	5247.5	0.0730889	0.0669889	0.0668889	5395.6	0.0533167	0.0487167	0.0556167	5395.6	0.0668167	0.0676167	0.0556167	5395.6	0.0551167	0.0574167	0.0633167	5395.6	0.0589167	0.0567167	0.0598167	5395.6	0.0498167	0.0499167	0.0483167	5395.6	0.0552167	0.0405167	0.0439167	5395.6	0.0465167	0.0479167	0.0453167	5395.6	0.0438167	0.0421167	0.0498167	5256
	5861.9	0.126375	0.126175	0.122675	6253	0.0978083	0.0919083	0.0975083	5903.4	0.0784222	0.0727222	0.0713222	5903.4	0.0784222	0.0727222	0.0713222	6070	0.0580667	0.0536667	0.0602667	6070	0.0725667	0.0732667	0.0602667	6070	0.0590667	0.0627667	0.0687667	6070	0.0627667	0.0626667	0.0658667	6070	0.0543667	0.0544667	0.0531667	6070	0.0593667	0.0436667	0.0475667	6070	0.0502667	0.0514667	0.0481667	6070	0.0470667	0.0447667	0.0530667	5913
	6513.3	0.12745	0.12655	0.12265	6947.8	0.101033	0.0945333	0.100033	6559.3	0.0835778	0.0790778	0.0766778	6559.3	0.0835778	0.0790778	0.0766778	6744.5	0.06275	0.05385	0.06535	6744.5	0.07875	0.07925	0.06535	6744.5	0.06375	0.06745	0.07375	6744.5	0.06935	0.06945	0.07215	6744.5	0.05915	0.05985	0.05825	6744.5	0.06355	0.04635	0.05115	6744.5	0.05415	0.05445	0.05175	6744.5	0.04945	0.04745	0.05625	6570
	7164.6	0.140275	0.136975	0.134575	7642.6	0.105458	0.0978583	0.102758	7215.2	0.0892444	0.0844444	0.0809444	7215.2	0.0892444	0.0844444	0.0809444	7418.9	0.0678167	0.0557167	0.0708167	7418.9	0.0857167	0.0867167	0.0712167	7418.9	0.0689167	0.0736167	0.0800167	7418.9	0.0741167	0.0704167	0.0788167	7418.9	0.0642167	0.0642167	0.0643167	7418.9	0.0678167	0.0492167	0.0540167	7418.9	0.0582167	0.0587167	0.0540167	7418.9	0.0527167	0.0505167	0.0598167	7227
	7816	0.142075	0.140075	0.137275	8337.3	0.108975	0.100475	0.105275	7871.1	0.0961667	0.0924667	0.0875667	7871.1	0.0961667	0.0924667	0.0875667	8093.3	0.0746833	0.0604833	0.0775833	8093.3	0.0962833	0.0965833	0.0802833	8093.3	0.0750833	0.0798833	0.0876833	8093.3	0.0830833	0.0748833	0.0890833	8093.3	0.0700833	0.0707833	0.0700833	8093.3	0.0728833	0.0533833	0.0577833	8093.3	0.0614833	0.0614833	0.0569833	8093.3	0.0571833	0.0543833	0.0645833	7884
	8467.3	0.149925	0.150225	0.144625	9032.1	0.112017	0.104617	0.108717	8527	0.103611	0.101011	0.0945111	8527	0.103611	0.101011	0.0945111	8767.7	0.081	0.0663	0.0835	8767.7	0.1035	0.1047	0.0867	8767.7	0.0818	0.087	0.0946	8767.7	0.0878	0.0787	0.0989	8767.7	0.0765	0.0776	0.0772	8767.7	0.0775	0.0572	0.0616	8767.7	0.0667	0.0659	0.0605	8767.7	0.061	0.0569	0.0687	8541
	9118.6	0.166	0.1607	0.1565	9726.8	0.114867	0.105767	0.112467	9182.9	0.110111	0.107611	0.0997111	9182.9	0.110111	0.107611	0.0997111	9442.1	0.0884	0.0718	0.0906	9442.1	0.1117	0.113	0.0945	9442.1	0.0883	0.0977	0.1032	9442.1	0.1002	0.0843	0.1113	9442.1	0.0833	0.085	0.0856	9442.1	0.0822	0.0606	0.0659	9442.1	0.0711	0.0697	0.0641	9442.1	0.0647	0.0612	0.0746	9198
	9769.9	0.1784	0.173	0.1631	10421.6	0.116475	0.107375	0.112275	9838.8	0.118022	0.116822	0.106322	9838.8	0.118022	0.116822	0.106322	10116.6	0.0953667	0.0766667	0.0990667	10116.6	0.130367	0.130167	0.105667	10116.6	0.0994667	0.105167	0.113767	10116.6	0.111867	0.0920667	0.126967	10116.6	0.0907667	0.0929667	0.0938667	10116.6	0.0868667	0.0646667	0.0699667	10116.6	0.0758667	0.0736667	0.0667667	10116.6	0.0693667	0.0652667	0.0795667	9855
	10421.2	0.18075	0.18055	0.16955	11116.3	0.11925	0.11085	0.11705	10494.7	0.127533	0.130633	0.115233	10494.7	0.127533	0.130633	0.115233	10791	0.10595	0.08415	0.10925	10791	0.13565	0.14225	0.11725	10791	0.11035	0.11685	0.13255	10791	0.12865	0.09985	0.14725	10791	0.09965	0.10135	0.10255	10791	0.09275	0.06905	0.07405	10791	0.08005	0.07855	0.06915	10791	0.07455	0.06945	0.08575	10512
	11072.6	0.188675	0.189375	0.183575	11811	0.120742	0.112442	0.118242	11150.7	0.136078	0.139478	0.122578	11150.7	0.136078	0.139478	0.122578	11465.4	0.1181	0.0917	0.1181	11465.4	0.1489	0.1595	0.1285	11465.4	0.1192	0.1272	0.1561	11465.4	0.1493	0.1102	0.1809	11465.4	0.1128	0.1138	0.1149	11465.4	0.1002	0.0738	0.0791	11465.4	0.0854	0.083	0.0738	11465.4	0.0795	0.0736	0.0918	11169
	11723.9	0.20655	0.20365	0.20155	12505.8	0.123142	0.114342	0.122642	11806.6	0.1426	0.1481	0.1287	11806.6	0.1426	0.1481	0.1287	12139.9	0.125383	0.0996833	0.127183	12139.9	0.168983	0.188983	0.143083	12139.9	0.131083	0.132583	0.172883	12139.9	0.161483	0.119183	0.205383	12139.9	0.119883	0.122783	0.125383	12139.9	0.108083	0.0791833	0.0842833	12139.9	0.0904833	0.0909833	0.0768833	12139.9	0.0848833	0.0782833	0.0976833	11826
	12375.2	0.2142	0.2162	0.2064	13200.5	0.123808	0.115608	0.125008	12462.6	0.1523	0.1616	0.139	12462.6	0.1523	0.1616	0.139	12814.3	0.145083	0.106183	0.150483	12814.3	0.188683	0.204883	0.153883	12814.3	0.146083	0.154983	0.188983	12814.3	0.175883	0.128783	0.230183	12814.3	0.136383	0.138983	0.140083	12814.3	0.117183	0.0853833	0.0916833	12814.3	0.0981833	0.0984833	0.0802833	12814.3	0.0910833	0.0834833	0.107583	12483
	13026.5	0.239025	0.238525	0.220625	13895.3	0.128042	0.118442	0.128042	13118.5	0.165156	0.175856	0.149456	13118.5	0.165156	0.175856	0.149456	13488.7	0.15775	0.11315	0.16285	13488.7	0.21185	0.23565	0.17715	13488.7	0.15375	0.16185	0.20985	13488.7	0.18605	0.13905	0.26695	13488.7	0.14995	0.15695	0.15665	13488.7	0.13245	0.09085	0.09775	13488.7	0.10625	0.09885	0.08275	13488.7	0.10165	0.08895	0.11975	13140
	13677.9	0.255175	0.255575	0.245475	14590	0.130117	0.119717	0.130317	13775.1	0.175489	0.185089	0.157589	13775.1	0.175489	0.185089	0.157589	14163.1	0.179933	0.122533	0.185533	14163.1	0.232033	0.249033	0.198033	14163.1	0.180133	0.183933	0.225233	14163.1	0.204033	0.148733	0.279433	14163.1	0.169333	0.174433	0.175033	14163.1	0.136933	0.0968333	0.104133	14163.1	0.112733	0.107933	0.0881333	14163.1	0.109633	0.0951333	0.137333	13797
	14329.2	0.275175	0.276775	0.263575	15284.9	0.133142	0.123142	0.133442	14431	0.186844	0.200744	0.166844	14431	0.186844	0.200744	0.166844	14837.6	0.2053	0.1323	0.1989	14837.6	0.2417	0.2661	0.221	14837.6	0.2047	0.2021	0.2439	14837.6	0.2213	0.1605	0.3072	14837.6	0.1806	0.1855	0.1918	14837.6	0.1393	0.1017	0.1084	14837.6	0.1263	0.114	0.0946	14837.6	0.1167	0.1015	0.1565	14454
	14980.5	0.30425	0.30085	0.28045	15979.6	0.138342	0.126642	0.137442	15086.9	0.211444	0.229044	0.189344	15086.9	0.211444	0.229044	0.189344	15512	0.222967	0.138067	0.204867	15512	0.257467	0.280167	0.239267	15512	0.238067	0.203967	0.258567	15512	0.240167	0.170467	0.324167	15512	0.195367	0.211067	0.221067	15512	0.141167	0.105067	0.113367	15512	0.131867	0.115067	0.0972667	15512	0.119367	0.105367	0.170367	15111
	15631.9	0.3263	0.3251	0.3077	16674.4	0.138775	0.127475	0.137675	15742.8	0.224611	0.245111	0.200411	15742.8	0.224611	0.245111	0.200411	16186.4	0.247083	0.151683	0.218383	16186.4	0.279783	0.301883	0.253283	16186.4	0.256383	0.221383	0.266583	16186.4	0.264683	0.183483	0.350383	16186.4	0.219683	0.239283	0.247583	16186.4	0.145883	0.110483	0.119583	16186.4	0.143483	0.121283	0.104583	16186.4	0.126383	0.113283	0.188883	15768
	16283.2	0.3423	0.3409	0.3176	17369.1	0.140833	0.128933	0.140033	16398.7	0.245033	0.274733	0.235333	16398.7	0.245033	0.274733	0.235333	16860.8	0.270967	0.164367	0.242567	16860.8	0.302667	0.314067	0.274067	16860.8	0.288667	0.249467	0.287467	16860.8	0.281467	0.197667	0.376767	16860.8	0.229367	0.255267	0.268267	16860.8	0.152467	0.117167	0.127667	16860.8	0.153367	0.131267	0.115767	16860.8	0.138267	0.122167	0.207267	16425.1
	16934.5	0.36405	0.36465	0.34175	18063.9	0.1435	0.1302	0.1417	17054.7	0.2564	0.2956	0.2354	17054.7	0.2564	0.2956	0.2354	17535.2	0.284883	0.171383	0.252283	17535.2	0.314583	0.322183	0.286283	17535.2	0.308783	0.269483	0.296883	17535.2	0.282883	0.206383	0.392983	17535.2	0.244783	0.258183	0.271983	17535.2	0.157483	0.121583	0.133583	17535.2	0.149283	0.134383	0.116083	17535.2	0.148183	0.128683	0.218883	17082.1
	17585.8	0.387375	0.383975	0.360075	18758.6	0.146117	0.133717	0.144817	17710.6	0.279456	0.326956	0.231556	17710.6	0.279456	0.326956	0.231556	18209.7	0.306367	0.182767	0.273367	18209.7	0.313967	0.317167	0.310867	18209.7	0.318767	0.287767	0.304867	18209.7	0.283767	0.216267	0.417167	18209.7	0.272967	0.289267	0.304267	18209.7	0.166067	0.129267	0.141967	18209.7	0.157467	0.142467	0.118867	18209.7	0.160767	0.137267	0.230267	17739.1
	18237.2	0.40505	0.40535	0.38115	19453.4	0.150492	0.138492	0.146892	18366.5	0.300922	0.351422	0.273022	18366.5	0.300922	0.351422	0.273022	18884.1	0.317867	0.192167	0.280167	18884.1	0.315267	0.322967	0.325567	18884.1	0.332467	0.303367	0.303167	18884.1	0.284867	0.223367	0.427167	18884.1	0.292767	0.312467	0.323167	18884.1	0.171167	0.134167	0.147767	18884.1	0.164467	0.149367	0.122867	18884.1	0.171967	0.146767	0.243567	18396.1
	18888.5	0.4235	0.4215	0.3925	20148.1	0.153383	0.139983	0.147383	19022.4	0.3211	0.3645	0.2908	19022.4	0.3211	0.3645	0.2908	19558.5	0.314767	0.201367	0.280167	19558.5	0.318167	0.329967	0.323667	19558.5	0.340867	0.309967	0.299867	19558.5	0.301867	0.232067	0.445667	19558.5	0.302767	0.339267	0.332167	19558.5	0.177867	0.139967	0.155267	19558.5	0.172967	0.155967	0.128567	19558.5	0.178467	0.157867	0.252267	19053.1
	19539.8	0.435625	0.439525	0.414225	20842.9	0.156792	0.142692	0.152192	19678.3	0.338578	0.389078	0.320178	19678.3	0.338578	0.389078	0.320178	20232.9	0.293233	0.205333	0.280433	20232.9	0.319533	0.332633	0.323633	20232.9	0.341733	0.314033	0.274033	20232.9	0.303633	0.238433	0.454633	20232.9	0.295833	0.355433	0.331933	20232.9	0.183033	0.145933	0.160833	20232.9	0.180133	0.162033	0.133633	20232.9	0.182933	0.164233	0.257133	19710.1
	20191.1	0.462975	0.460875	0.431775	21537.6	0.159883	0.145083	0.157183	20334.2	0.352144	0.407144	0.340144	20334.2	0.352144	0.407144	0.340144	20907.4	0.29315	0.21365	0.28585	20907.4	0.33045	0.34555	0.33095	20907.4	0.33975	0.30965	0.27515	20907.4	0.31285	0.24565	0.46955	20907.4	0.29795	0.38055	0.34075	20907.4	0.19315	0.15465	0.17075	20907.4	0.18955	0.17175	0.13975	20907.4	0.19305	0.17315	0.27345	20367.1
	20842.5	0.47335	0.47215	0.44095	22232.4	0.162933	0.147433	0.157333	20990.1	0.373122	0.418322	0.363022	20990.1	0.373122	0.418322	0.363022	21581.8	0.280717	0.217717	0.277917	21581.8	0.328217	0.350017	0.329617	21581.8	0.320117	0.293917	0.247817	21581.8	0.314317	0.250217	0.484917	21581.8	0.291017	0.388317	0.341617	21581.8	0.196017	0.159417	0.174817	21581.8	0.194517	0.176217	0.142517	21581.8	0.202017	0.178117	0.278317	21024.1
	21493.8	0.481	0.4867	0.4566	22927.1	0.165092	0.149792	0.159592	21646	0.380622	0.430722	0.383022	21646	0.380622	0.430722	0.383022	22256.2	0.271617	0.221717	0.261117	22256.2	0.331817	0.357117	0.330117	22256.2	0.316217	0.291117	0.253817	22256.2	0.338417	0.257017	0.501817	22256.2	0.288117	0.395717	0.352217	22256.2	0.203817	0.167317	0.183017	22256.2	0.202317	0.182817	0.149317	22256.2	0.211417	0.186617	0.291217	21681.1
	22145.1	0.499625	0.500525	0.469525	23621.9	0.167308	0.152608	0.161508	22302	0.387911	0.438111	0.391211	22302	0.387911	0.438111	0.391211	22930.6	0.267433	0.228733	0.262133	22930.6	0.345033	0.368933	0.335933	22930.6	0.322033	0.298833	0.257033	22930.6	0.370133	0.266633	0.521833	22930.6	0.300433	0.407333	0.370733	22930.6	0.213533	0.176733	0.192933	22930.6	0.213433	0.192833	0.154533	22930.6	0.227233	0.201333	0.312233	22338.1
	22796.4	0.50465	0.50765	0.47825	24316.7	0.170258	0.155458	0.165358	22957.9	0.396667	0.453767	0.406067	22957.9	0.396667	0.453767	0.406067	23605.1	0.269783	0.232483	0.264383	23605.1	0.347083	0.371983	0.335683	23605.1	0.319083	0.297283	0.259283	23605.1	0.377683	0.270683	0.533083	23605.1	0.295083	0.412783	0.373283	23605.1	0.218683	0.182183	0.198083	23605.1	0.217783	0.196383	0.158583	23605.1	0.237883	0.210883	0.313083	22995.1
	23447.8	0.514325	0.517125	0.484225	25011.4	0.172858	0.158258	0.168158	23613.8	0.407467	0.467867	0.418367	23613.8	0.407467	0.467867	0.418367	24279.5	0.27345	0.23655	0.26865	24279.5	0.34405	0.37755	0.32735	24279.5	0.31025	0.26865	0.26275	24279.5	0.38315	0.27465	0.54145	24279.5	0.28615	0.41855	0.37475	24279.5	0.22465	0.18845	0.20405	24279.5	0.22425	0.20145	0.16345	24279.5	0.24305	0.21615	0.30745	23652.1
	24099.1	0.524875	0.521775	0.486875	25706.2	0.175108	0.161908	0.169208	24269.7	0.409156	0.471156	0.419856	24269.7	0.409156	0.471156	0.419856	24953.9	0.277783	0.239883	0.272783	24953.9	0.337683	0.380983	0.328383	24953.9	0.316783	0.271283	0.264683	24953.9	0.402183	0.281983	0.551083	24953.9	0.291883	0.431783	0.384283	24953.9	0.229683	0.194783	0.212083	24953.9	0.231683	0.207683	0.166483	24953.9	0.255383	0.227783	0.304683	24309.1
	24750.4	0.53225	0.53035	0.49395	26400.9	0.1786	0.1653	0.1729	24925.8	0.414944	0.480444	0.429844	24925.8	0.414944	0.480444	0.429844	25628.3	0.279317	0.241917	0.272817	25628.3	0.288617	0.375817	0.308517	25628.3	0.277717	0.272817	0.264917	25628.3	0.394917	0.282817	0.542917	25628.3	0.295317	0.432317	0.382017	25628.3	0.235517	0.199017	0.216517	25628.3	0.234517	0.209117	0.168617	25628.3	0.263617	0.231317	0.276517	24966.1
	25401.7	0.53865	0.53525	0.49525	27095.7	0.181592	0.168392	0.175492	25581.6	0.423978	0.487778	0.443578	25581.6	0.423978	0.487778	0.443578	26302.8	0.285067	0.246167	0.277767	26302.8	0.291967	0.381567	0.285667	26302.8	0.281067	0.274867	0.266067	26302.8	0.416567	0.288567	0.556567	26302.8	0.302167	0.446667	0.390867	26302.8	0.241067	0.205767	0.222067	26302.8	0.241167	0.213367	0.171967	26302.8	0.273067	0.240767	0.284567	25623.8
	26053	0.5432	0.5356	0.4878	27790.4	0.1842	0.1718	0.1771	26237.6	0.427311	0.494511	0.450811	26237.6	0.427311	0.494511	0.450811	26977.2	0.291	0.2518	0.2862	26977.2	0.2997	0.3902	0.2899	26977.2	0.2879	0.2801	0.2707	26977.2	0.4322	0.2927	0.5675	26977.2	0.3094	0.4598	0.4	26977.2	0.2477	0.2132	0.2293	26977.2	0.249	0.2221	0.1777	26977.2	0.2855	0.2537	0.2946	26280.9
	26704.4	0.544925	0.530325	0.474325	28485.2	0.185608	0.175108	0.178608	26893.6	0.437989	0.498089	0.460189	26893.6	0.437989	0.498089	0.460189	27651.6	0.2945	0.2552	0.2891	27651.6	0.3028	0.3864	0.2937	27651.6	0.2906	0.2838	0.2733	27651.6	0.4316	0.298	0.574	27651.6	0.3152	0.4662	0.4004	27651.6	0.2541	0.2199	0.235	27651.6	0.2538	0.225	0.1797	27651.6	0.2928	0.2614	0.3027	26937.9
	27355.7	0.54835	0.52965	0.46655	29179.9	0.187783	0.176283	0.180183	27549.5	0.444289	0.493889	0.465389	27549.5	0.444289	0.493889	0.465389	28326	0.299117	0.257817	0.292417	28326	0.305917	0.383317	0.296917	28326	0.293217	0.286117	0.274717	28326	0.431617	0.305417	0.591817	28326	0.318717	0.469717	0.404417	28326	0.259317	0.224517	0.238517	28326	0.258517	0.228617	0.182217	28326	0.301817	0.270717	0.310717	27594.9
	28007	0.54535	0.52555	0.44925	29874.6	0.187908	0.177708	0.182808	28205.4	0.441722	0.493322	0.465922	28205.4	0.441722	0.493322	0.465922	29000.5	0.303083	0.260583	0.296683	29000.5	0.310583	0.383583	0.300283	29000.5	0.297183	0.289783	0.277583	29000.5	0.452383	0.311383	0.593683	29000.5	0.324983	0.481483	0.413783	29000.5	0.264483	0.231283	0.243683	29000.5	0.263783	0.232883	0.185583	29000.5	0.309083	0.278683	0.316783	28251.9
	28658.3	0.537	0.5108	0.4215	30569.4	0.192492	0.183392	0.185092	28861.4	0.442644	0.491044	0.465344	28861.4	0.442644	0.491044	0.465344	29674.9	0.305933	0.263333	0.299633	29674.9	0.314033	0.374633	0.304133	29674.9	0.301633	0.292633	0.280233	29674.9	0.449233	0.315933	0.598333	29674.9	0.329033	0.482933	0.407433	29674.9	0.269533	0.237533	0.247633	29674.9	0.268133	0.236133	0.188433	29674.9	0.316133	0.286533	0.324933	28908.9
	29309.7	0.5228	0.489	0.4003	31264.2	0.194633	0.185833	0.189133	29517.4	0.431122	0.486622	0.462222	29517.4	0.431122	0.486622	0.462222	30349.3	0.310183	0.266483	0.303483	30349.3	0.318983	0.325383	0.308183	30349.3	0.304383	0.296083	0.281283	30349.3	0.463783	0.321183	0.600183	30349.3	0.331683	0.487383	0.411583	30349.3	0.274283	0.242083	0.251283	30349.3	0.272383	0.238783	0.190583	30349.3	0.323983	0.294583	0.331883	29565.9
	29961	0.514175	0.465575	0.401975	31958.9	0.198083	0.189883	0.192483	30173.3	0.390933	0.478533	0.468333	30173.3	0.390933	0.478533	0.468333	31023.7	0.31285	0.26785	0.30545	31023.7	0.32125	0.32195	0.31075	31023.7	0.30625	0.29665	0.28185	31023.7	0.47405	0.32885	0.61125	31023.7	0.33645	0.49355	0.41495	31023.7	0.27895	0.24745	0.25535	31023.7	0.27555	0.24235	0.19325	31023.7	0.33025	0.30085	0.33735	30222.9
	30612.3	0.502425	0.449425	0.397925	32653.6	0.197067	0.191067	0.190767	30829.2	0.396	0.4724	0.4591	30829.2	0.396	0.4724	0.4591	31698.9	0.317383	0.271283	0.310083	31698.9	0.325183	0.326683	0.315283	31698.9	0.308983	0.298983	0.284083	31698.9	0.488183	0.330183	0.615783	31698.9	0.339683	0.498483	0.415783	31698.9	0.281683	0.251783	0.259983	31698.9	0.280883	0.246083	0.195483	31698.9	0.335883	0.308483	0.344083	30879.9
	31263.6	0.476775	0.423675	0.337175	33348.4	0.201533	0.196433	0.197033	31485.1	0.400389	0.428289	0.452389	31485.1	0.400389	0.428289	0.452389	32373.3	0.317533	0.271333	0.310633	32373.3	0.325533	0.327033	0.316333	32373.3	0.310633	0.300833	0.285233	32373.3	0.476533	0.330733	0.615233	32373.3	0.342533	0.495833	0.410933	32373.3	0.286933	0.257133	0.262533	32373.3	0.283033	0.248533	0.198433	32373.3	0.339833	0.311333	0.349033	31536.9
	31915	0.4531	0.404	0.3409	34043.1	0.204192	0.199792	0.198292	32141	0.403911	0.430611	0.437011	32141	0.403911	0.430611	0.437011	33047.7	0.320367	0.272867	0.313967	33047.7	0.327867	0.329267	0.318567	33047.7	0.313367	0.302667	0.286967	33047.7	0.493867	0.336167	0.613467	33047.7	0.346967	0.497267	0.415467	33047.7	0.292867	0.262767	0.265967	33047.7	0.286567	0.250567	0.199767	33047.7	0.347667	0.317867	0.357067	32193.9
	32566.3	0.442375	0.400375	0.343875	34737.9	0.206692	0.205092	0.203092	32796.9	0.407	0.4351	0.4328	32796.9	0.407	0.4351	0.4328	33722.1	0.3249	0.2775	0.3173	33722.1	0.3319	0.333	0.3222	33722.1	0.3165	0.3054	0.2875	33722.1	0.5011	0.3372	0.604	33722.1	0.3517	0.493	0.4143	33722.1	0.2946	0.2668	0.2698	33722.1	0.2904	0.2532	0.2017	33722.1	0.3512	0.323	0.3595	32850.9
	33217.6	0.42445	0.35035	0.34445	35432.6	0.207425	0.206525	0.204125	33452.8	0.412889	0.440889	0.394289	33452.8	0.412889	0.440889	0.394289	34396.6	0.32725	0.28245	0.32095	34396.6	0.33635	0.33775	0.32745	34396.6	0.32015	0.30875	0.29005	34396.6	0.51655	0.33905	0.61585	34396.6	0.35795	0.48515	0.41715	34396.6	0.29875	0.27205	0.27435	34396.6	0.29585	0.25665	0.20425	34396.6	0.35565	0.32855	0.36485	33507.9
	33868.9	0.393175	0.349075	0.346075	36127.4	0.21005	0.20955	0.20945	34108.9	0.414856	0.441456	0.396556	34108.9	0.414856	0.441456	0.396556	35071	0.330333	0.285633	0.322033	35071	0.338133	0.339133	0.328233	35071	0.320533	0.309233	0.288833	35071	0.527433	0.342633	0.611433	35071	0.363733	0.455033	0.417033	35071	0.304933	0.274733	0.279433	35071	0.296233	0.257733	0.204133	35071	0.363933	0.338833	0.375833	34164.9
	34520.3	0.36005	0.35095	0.34735	36822.1	0.210467	0.210367	0.211167	34764.7	0.418933	0.446433	0.400933	34764.7	0.418933	0.446433	0.400933	35745.4	0.332867	0.290667	0.323567	35745.4	0.339767	0.340567	0.330167	35745.4	0.322267	0.310467	0.288767	35745.4	0.524267	0.346067	0.612267	35745.4	0.369567	0.446467	0.418167	35745.4	0.303067	0.283567	0.280267	35745.4	0.301067	0.258967	0.206667	35745.4	0.366367	0.340767	0.378667	34821.9
	35171.6	0.361825	0.353125	0.349025	37516.9	0.213517	0.215317	0.213317	35420.7	0.419267	0.445567	0.400867	35420.7	0.419267	0.445567	0.400867	36419.8	0.336217	0.295017	0.328017	36419.8	0.342217	0.342917	0.332217	36419.8	0.323217	0.311417	0.289317	36419.8	0.527417	0.345417	0.586117	36419.8	0.373717	0.449017	0.373017	36419.8	0.305317	0.287117	0.284417	36419.8	0.299017	0.261417	0.206817	36419.8	0.373217	0.341817	0.384917	35478.9
	35822.9	0.3619	0.3523	0.349	38211.6	0.214933	0.218833	0.215133	36076.6	0.424667	0.450567	0.406667	36076.6	0.424667	0.450567	0.406667	37094.3	0.3376	0.2976	0.33	37094.3	0.3428	0.3443	0.3323	37094.3	0.324	0.3131	0.2877	37094.3	0.5373	0.352	0.5962	37094.3	0.3791	0.453	0.3793	37094.3	0.3175	0.2915	0.2888	37094.3	0.3026	0.2641	0.2069	37094.3	0.3824	0.3521	0.3884	36135.9
	36475	0.362975	0.353175	0.349975	38906.4	0.218142	0.223142	0.221242	36732.5	0.4292	0.4561	0.4126	36732.5	0.4292	0.4561	0.4126	37768.7	0.34085	0.30235	0.33405	37768.7	0.34675	0.34825	0.33705	37768.7	0.32695	0.31625	0.28875	37768.7	0.52245	0.35205	0.60415	37768.7	0.38275	0.45675	0.38385	37768.7	0.32105	0.29405	0.29155	37768.7	0.30845	0.26325	0.21015	37768.7	0.39065	0.35535	0.39805	36792.9
	37126.3	0.364225	0.353825	0.351325	39601.8	0.217942	0.225642	0.222242	37388.4	0.430522	0.455322	0.412822	37388.4	0.430522	0.455322	0.412822	38443.1	0.344917	0.306517	0.339117	38443.1	0.349017	0.348817	0.338317	38443.1	0.329317	0.314517	0.286717	38443.1	0.529417	0.355417	0.605017	38443.1	0.387517	0.459917	0.389117	38443.1	0.327517	0.294017	0.295117	38443.1	0.313817	0.267517	0.210817	38443.1	0.398817	0.361417	0.405717	37449.9
	37777.6	0.364975	0.354075	0.350675	40296.6	0.22035	0.22895	0.22485	38044.3	0.430733	0.456833	0.413633	38044.3	0.430733	0.456833	0.413633	39117.5	0.346583	0.308883	0.342883	39117.5	0.349283	0.350083	0.338083	39117.5	0.325983	0.312483	0.285083	39117.5	0.527883	0.357283	0.613883	39117.5	0.392483	0.463183	0.391983	39117.5	0.329983	0.304083	0.296783	39117.5	0.314583	0.267283	0.210783	39117.5	0.405983	0.361783	0.401683	38106.9
	38428.9	0.364375	0.354375	0.351175	40991.3	0.221358	0.232458	0.226758	38700.2	0.436456	0.460556	0.417656	38700.2	0.436456	0.460556	0.417656	39792	0.34865	0.31205	0.34495	39792	0.35165	0.35125	0.34045	39792	0.32765	0.31785	0.28765	39792	0.53445	0.36125	0.63395	39792	0.39675	0.46725	0.39725	39792	0.32785	0.30675	0.29695	39792	0.30865	0.26785	0.21025	39792	0.41105	0.36575	0.40665	38763.9
	39080.2	0.367275	0.356075	0.353275	41686.1	0.221308	0.233908	0.227308	39356.1	0.440433	0.464433	0.421833	39356.1	0.440433	0.464433	0.421833	40466.4	0.3547	0.3164	0.3491	40466.4	0.3542	0.3548	0.3435	40466.4	0.3353	0.3179	0.2876	40466.4	0.5345	0.3644	0.641	40466.4	0.4035	0.4711	0.4017	40466.4	0.336	0.3088	0.3019	40466.4	0.3174	0.2699	0.212	40466.4	0.4197	0.3721	0.4169	39420.9
	39731.6	0.36635	0.35565	0.35295	42380.8	0.222867	0.236567	0.228167	40012	0.437344	0.461744	0.418444	40012	0.437344	0.461744	0.418444	41140.8	0.355233	0.319233	0.353233	41140.8	0.356633	0.356033	0.344633	41140.8	0.331233	0.315033	0.287533	41140.8	0.531333	0.366533	0.669033	41140.8	0.407033	0.476533	0.407733	41140.8	0.340333	0.313333	0.307533	41140.8	0.320033	0.272533	0.212333	41140.8	0.433933	0.374033	0.432733	40077.9
	40382.9	0.367475	0.356775	0.353475	43075.5	0.224933	0.240033	0.231033	40668	0.444033	0.467033	0.424633	40668	0.444033	0.467033	0.424633	41815.2	0.359217	0.320417	0.358417	41815.2	0.360017	0.360817	0.348017	41815.2	0.337017	0.321717	0.288317	41815.2	0.515317	0.365317	0.664417	41815.2	0.412517	0.479217	0.412817	41815.2	0.342417	0.319317	0.306317	41815.2	0.319017	0.272117	0.213117	41815.2	0.442417	0.374517	0.421317	40734.9
	41034.2	0.3701	0.3586	0.3561	43770.3	0.224192	0.242092	0.232792	41323.9	0.443878	0.465878	0.423478	41323.9	0.443878	0.465878	0.423478	42489.7	0.358033	0.323933	0.360033	42489.7	0.361133	0.357633	0.346433	42489.7	0.335733	0.320933	0.286433	42489.7	0.479033	0.362633	0.649033	42489.7	0.412433	0.477333	0.412833	42489.7	0.344033	0.322833	0.305433	42489.7	0.319933	0.271133	0.211833	42489.7	0.437933	0.375033	0.422533	41391.9
	41685.5	0.367475	0.357075	0.353375	44465	0.22405	0.24245	0.23315	41979.8	0.447056	0.469656	0.427856	41979.8	0.447056	0.469656	0.427856	43164.1	0.36255	0.32505	0.36155	43164.1	0.36435	0.36475	0.34975	43164.1	0.33415	0.31675	0.28615	43164.1	0.44435	0.36845	0.67355	43164.1	0.41745	0.48345	0.41845	43164.1	0.35425	0.32965	0.31005	43164.1	0.32175	0.27235	0.21255	43164.1	0.45055	0.38205	0.43095	42048.9
	42336.9	0.36725	0.35505	0.35105	45159.8	0.224075	0.243975	0.233775	42635.7	0.448	0.471	0.4297	42635.7	0.448	0.471	0.4297	43838.5	0.364067	0.327367	0.368467	43838.5	0.365367	0.364567	0.351667	43838.5	0.341967	0.322067	0.283867	43838.5	0.443467	0.368467	0.651967	43838.5	0.423067	0.485367	0.420167	43838.5	0.350467	0.332067	0.308067	43838.5	0.322867	0.273367	0.211867	43838.5	0.444767	0.383567	0.431467	42705.9
	42988.2	0.36795	0.35505	0.35205	45854.5	0.226617	0.248117	0.238417	43291.6	0.447811	0.471011	0.428811	43291.6	0.447811	0.471011	0.428811	44512.9	0.367167	0.335567	0.373767	44512.9	0.369267	0.365067	0.352467	44512.9	0.341167	0.320267	0.279867	44512.9	0.446267	0.371267	0.648467	44512.9	0.422267	0.487167	0.425467	44512.9	0.358167	0.333467	0.306867	44512.9	0.321567	0.265867	0.211567	44512.9	0.452467	0.385067	0.431967	43362.9
	43639.5	0.36765	0.35435	0.35145	46549.3	0.228292	0.252592	0.239792	43947.5	0.452744	0.476044	0.435044	43947.5	0.452744	0.476044	0.435044	45187.3	0.368517	0.332717	0.370317	45187.3	0.366317	0.367117	0.352917	45187.3	0.341217	0.323317	0.282717	45187.3	0.452617	0.368817	0.672117	45187.3	0.429217	0.492017	0.431317	45187.3	0.356617	0.339217	0.316117	45187.3	0.322817	0.269817	0.210517	45187.3	0.460417	0.397017	0.438117	44019.9
	44290.8	0.370775	0.357475	0.353975	47244	0.2258	0.2493	0.2373	44603.4	0.452989	0.475789	0.434889	44603.4	0.452989	0.475789	0.434889	45861.8	0.37245	0.33255	0.37105	45861.8	0.37095	0.37265	0.35315	45861.8	0.34055	0.32105	0.28125	45861.8	0.45445	0.36525	0.65785	45861.8	0.42875	0.49265	0.43135	45861.8	0.36325	0.34245	0.31775	45861.8	0.32635	0.27215	0.21105	45861.8	0.46665	0.39345	0.44415	44676.9
	44942.1	0.369725	0.356225	0.353325	47938.8	0.22905	0.25465	0.24205	45259.3	0.455178	0.477378	0.437278	45259.3	0.455178	0.477378	0.437278	46536.2	0.380867	0.332267	0.372167	46536.2	0.369067	0.367067	0.356067	46536.2	0.341067	0.317367	0.280467	46536.2	0.453367	0.367467	0.660067	46536.2	0.430967	0.495367	0.432267	46536.2	0.362467	0.338867	0.316067	46536.2	0.319767	0.260767	0.206567	46536.2	0.466167	0.397367	0.448067	45333.9
	45593.5	0.36645	0.35395	0.35035	48633.6	0.228133	0.255733	0.242133	45915.2	0.458733	0.480733	0.440633	45915.2	0.458733	0.480733	0.440633	47210.6	0.372567	0.336367	0.374267	47210.6	0.372967	0.373167	0.356867	47210.6	0.344267	0.319667	0.277967	47210.6	0.460567	0.364967	0.642367	47210.6	0.433167	0.495467	0.435267	47210.6	0.362067	0.340667	0.321367	47210.6	0.313967	0.266267	0.206767	47210.6	0.464167	0.399167	0.449867	45990.9
	46244.8	0.3652	0.3512	0.3478	49328.3	0.226817	0.254717	0.241317	46571.1	0.455811	0.478011	0.437811	46571.1	0.455811	0.478011	0.437811	47885	0.378	0.3368	0.3801	47885	0.3741	0.3758	0.3594	47885	0.3395	0.3198	0.2732	47885	0.4632	0.3685	0.6391	47885	0.438	0.4994	0.4391	47885	0.365	0.3519	0.3251	47885	0.3214	0.267	0.2061	47885	0.4734	0.3994	0.4557	46647.9
	46896.1	0.364475	0.350675	0.347475	50023.1	0.226558	0.256758	0.242158	47227	0.461989	0.484489	0.445589	47227	0.461989	0.484489	0.445589	48559.5	0.37585	0.33935	0.39105	48559.5	0.37475	0.37425	0.36285	48559.5	0.34405	0.31965	0.27655	48559.5	0.46375	0.36955	0.62915	48559.5	0.43945	0.50055	0.44175	48559.5	0.36795	0.35435	0.32385	48559.5	0.31645	0.26665	0.20455	48559.5	0.47525	0.40535	0.45565	47304.9
	47547.4	0.3656	0.352	0.347	50717.8	0.22905	0.25935	0.24105	47883	0.46	0.4823	0.4438	47883	0.46	0.4823	0.4438	49233.9	0.3886	0.3397	0.3972	49233.9	0.3788	0.3798	0.3621	49233.9	0.3457	0.3231	0.2742	49233.9	0.466	0.3739	0.6271	49233.9	0.442	0.5049	0.4435	49233.9	0.3707	0.3535	0.3252	49233.9	0.3206	0.2662	0.2048	49233.9	0.5037	0.4091	0.4633	47961.9
	48198.7	0.3671	0.3522	0.3476	51412.5	0.228025	0.259725	0.242625	48538.9	0.465556	0.487456	0.448256	48538.9	0.465556	0.487456	0.448256	49908.3	0.3785	0.3372	0.398	49908.3	0.3728	0.3747	0.3626	49908.3	0.3411	0.3181	0.2688	49908.3	0.4653	0.3752	0.601	49908.3	0.442	0.506	0.4429	49908.3	0.3706	0.3549	0.3305	49908.3	0.3123	0.2655	0.2009	49908.3	0.4787	0.4113	0.4556	48618.9
	48850.1	0.365875	0.350775	0.346075	52107.3	0.226025	0.259425	0.241525	49194.8	0.464989	0.486689	0.448989	49194.8	0.464989	0.486689	0.448989	50582.7	0.385233	0.344133	0.406833	50582.7	0.379233	0.376833	0.362133	50582.7	0.343733	0.319633	0.267133	50582.7	0.472033	0.375533	0.597133	50582.7	0.446133	0.508933	0.451533	50582.7	0.376033	0.364233	0.335233	50582.7	0.317433	0.267133	0.201033	50582.7	0.496333	0.416333	0.466533	49275.9
	49501.4	0.3641	0.3493	0.3454	52802.1	0.225133	0.259033	0.239833	49850.8	0.464644	0.488444	0.450044	49850.8	0.464644	0.488444	0.450044	51257.2	0.38185	0.34625	0.40865	51257.2	0.38205	0.38285	0.36435	51257.2	0.34555	0.32355	0.27275	51257.2	0.47365	0.37755	0.58675	51257.2	0.44765	0.51065	0.45345	51257.2	0.37315	0.36235	0.33905	51257.2	0.31325	0.26745	0.19915	51257.2	0.51705	0.42145	0.47365	49932.9
	50152.7	0.3639	0.3483	0.3437	53496.8	0.225617	0.260317	0.241217	50506.8	0.466711	0.488811	0.452511	50506.8	0.466711	0.488811	0.452511	51931.6	0.382933	0.346533	0.402233	51931.6	0.381233	0.383733	0.364533	51931.6	0.342433	0.327033	0.269933	51931.6	0.479533	0.381433	0.564733	51931.6	0.449233	0.511533	0.453633	51931.6	0.374433	0.368333	0.335633	51931.6	0.321133	0.260133	0.199033	51931.6	0.492233	0.420033	0.468133	50589.9
	50804	0.3637	0.348	0.3424	54191.5	0.226642	0.260142	0.240942	51162.7	0.467589	0.488889	0.451489	51162.7	0.467589	0.488889	0.451489	52606	0.393567	0.347067	0.400267	52606	0.382167	0.379767	0.365767	52606	0.344667	0.318267	0.266267	52606	0.477867	0.388267	0.538367	52606	0.449067	0.512967	0.454667	52606	0.374467	0.366167	0.336767	52606	0.319167	0.260667	0.195667	52606	0.485067	0.427967	0.468367	51246.9
	51455.4	0.361025	0.345325	0.340625	54886.3	0.224425	0.259625	0.240425	51818.6	0.466311	0.487711	0.449311	51818.6	0.466311	0.487711	0.449311	53280.4	0.388483	0.350383	0.412883	53280.4	0.378983	0.381583	0.364983	53280.4	0.344483	0.325983	0.264783	53280.4	0.482883	0.396983	0.527783	53280.4	0.451583	0.513283	0.455883	53280.4	0.376783	0.361983	0.335983	53280.4	0.318183	0.259583	0.192183	53280.4	0.560883	0.433583	0.479983	51903.9
	52106.7	0.36145	0.34565	0.33935	55581	0.225067	0.261967	0.240867	52474.5	0.466022	0.486922	0.451422	52474.5	0.466022	0.486922	0.451422	53954.9	0.387333	0.347533	0.408933	53954.9	0.379233	0.384833	0.364733	53954.9	0.364633	0.314633	0.255233	53954.9	0.482033	0.396333	0.516133	53954.9	0.450533	0.515033	0.457633	53954.9	0.375933	0.367233	0.340933	53954.9	0.320233	0.252533	0.192333	53954.9	0.565833	0.435833	0.483733	52560.9
	52758	0.3606	0.3444	0.3385	56275.8	0.223767	0.260567	0.240967	53131.2	0.469456	0.490856	0.453356	53131.2	0.469456	0.490856	0.453356	54629.3	0.386333	0.339533	0.409333	54629.3	0.381033	0.379033	0.365033	54629.3	0.352833	0.324133	0.258733	54629.3	0.488533	0.396733	0.478133	54629.3	0.453633	0.517933	0.460233	54629.3	0.377333	0.370933	0.339833	54629.3	0.321433	0.249033	0.189533	54629.3	0.555133	0.447333	0.483133	53217.9
	53409.3	0.360625	0.343925	0.338625	56970.5	0.223642	0.259642	0.240242	53787.1	0.469	0.4896	0.4531	53787.1	0.469	0.4896	0.4531	55303.7	0.389	0.3571	0.4283	55303.7	0.3819	0.385	0.3665	55303.7	0.3417	0.3128	0.2517	55303.7	0.4921	0.3973	0.4809	55303.7	0.4542	0.5207	0.4575	55303.7	0.3799	0.3749	0.3453	55303.7	0.3182	0.2461	0.1884	55303.7	0.5557	0.4561	0.4967	53874.9
	54060.6	0.359025	0.342525	0.335025	57665.3	0.222783	0.260283	0.239483	54443	0.470322	0.490122	0.453422	54443	0.470322	0.490122	0.453422	55978.2	0.391	0.3419	0.4197	55978.2	0.383	0.3862	0.3632	55978.2	0.3407	0.319	0.2467	55978.2	0.4898	0.4005	0.4855	55978.2	0.4525	0.5197	0.4594	55978.2	0.382	0.3751	0.3463	55978.2	0.3178	0.2429	0.1851	55978.2	0.5752	0.4579	0.498	54531.9
	54712	0.356325	0.339625	0.332425	58360	0.224033	0.262733	0.241733	55098.9	0.470611	0.490111	0.453411	55098.9	0.470611	0.490111	0.453411	56652.6	0.38665	0.34015	0.42305	56652.6	0.38225	0.38555	0.36295	56652.6	0.34035	0.31575	0.24635	56652.6	0.49275	0.40645	0.48575	56652.6	0.45575	0.52195	0.46015	56652.6	0.38105	0.37335	0.34525	56652.6	0.32265	0.24835	0.18335	56652.6	0.58775	0.48155	0.51145	55188.9
					59054.7	0.2219	0.2608	0.2384	55754.8	0.470556	0.489556	0.453856	55754.8	0.470556	0.489556	0.453856	57327	0.3945	0.3399	0.4176	57327	0.3836	0.3841	0.3599	57327	0.3744	0.3165	0.2378	57327	0.498	0.407	0.487	57327	0.4545	0.5219	0.4614	57327	0.3812	0.3705	0.3487	57327	0.3226	0.2492	0.1806	57327	0.5556	0.4836	0.5055	55845.9
					59749.5	0.222158	0.262458	0.237958	56410.7	0.471222	0.488622	0.452622	56410.7	0.471222	0.488622	0.452622	58001.4	0.391117	0.338717	0.422417	58001.4	0.384617	0.379617	0.363617	58001.4	0.349017	0.323517	0.232417	58001.4	0.498717	0.407217	0.488817	58001.4	0.456017	0.524117	0.462117	58001.4	0.382217	0.376217	0.350617	58001.4	0.324517	0.238417	0.178017	58001.4	0.584417	0.501717	0.532117	56502.9
					60444.2	0.220867	0.262767	0.239467	57066.6	0.474356	0.491656	0.456556	57066.6	0.474356	0.491656	0.456556	58675.9	0.408283	0.341683	0.420983	58675.9	0.382683	0.384583	0.363383	58675.9	0.355283	0.329883	0.226483	58675.9	0.500383	0.408383	0.490383	58675.9	0.455883	0.525183	0.464583	58675.9	0.381683	0.376583	0.356083	58675.9	0.326583	0.246083	0.176183	58675.9	0.591383	0.507883	0.548883	57159.9
					61139	0.219225	0.260425	0.237325	57722.5	0.4693	0.4864	0.4518	57722.5	0.4693	0.4864	0.4518	59350.3	0.39145	0.34355	0.42705	59350.3	0.38125	0.38455	0.36205	59350.3	0.33715	0.31005	0.22225	59350.3	0.49955	0.40705	0.48835	59350.3	0.45605	0.52625	0.46525	59350.3	0.37965	0.37455	0.35365	59350.3	0.31965	0.23355	0.17345	59350.3	0.57925	0.52175	0.50265	57816.9
					61833.7	0.220242	0.262242	0.236842	58378.4	0.470256	0.486056	0.451256	58378.4	0.470256	0.486056	0.451256	60024.7	0.389283	0.340883	0.423883	60024.7	0.382283	0.381383	0.363283	60024.7	0.361583	0.306183	0.216983	60024.7	0.505783	0.408983	0.489083	60024.7	0.455883	0.525483	0.464283	60024.7	0.380683	0.377483	0.360383	60024.7	0.320383	0.242683	0.170883	60024.7	0.609783	0.523883	0.561483	58473.9
					62528.5	0.22025	0.26165	0.23535	59034.3	0.470278	0.485378	0.451378	59034.3	0.470278	0.485378	0.451378	60699.1	0.388317	0.339017	0.427417	60699.1	0.384017	0.384117	0.363117	60699.1	0.354217	0.333817	0.210917	60699.1	0.508917	0.411917	0.500217	60699.1	0.456417	0.528117	0.466817	60699.1	0.380917	0.380217	0.354217	60699.1	0.323117	0.235217	0.169417	60699.1	0.607517	0.522017	0.552217	59130.9
					63223.2	0.218892	0.261692	0.234792	59690.2	0.4706	0.4861	0.45	59690.2	0.4706	0.4861	0.45	61373.6	0.394367	0.341467	0.423267	61373.6	0.385567	0.380167	0.368167	61373.6	0.341267	0.328667	0.209667	61373.6	0.508767	0.409467	0.520067	61373.6	0.456967	0.529767	0.468067	61373.6	0.383467	0.375467	0.363467	61373.6	0.316967	0.231967	0.165767	61373.6	0.611767	0.525267	0.563967	59787.9
					63917.9	0.216533	0.258333	0.233233	60346.1	0.469778	0.484478	0.449978	60346.1	0.469778	0.484478	0.449978	62048	0.413083	0.336883	0.430683	62048	0.381183	0.376083	0.360283	62048	0.355383	0.322583	0.203983	62048	0.508883	0.413583	0.526383	62048	0.456483	0.527583	0.470883	62048	0.379183	0.378583	0.362183	62048	0.317783	0.227783	0.160883	62048	0.601383	0.528183	0.568483	60444.9
					64612.7	0.216042	0.262442	0.233142	61002	0.4686	0.4826	0.4471	61002	0.4686	0.4826	0.4471	62722.4	0.386667	0.338167	0.423367	62722.4	0.378767	0.374967	0.359667	62722.4	0.379867	0.316267	0.200567	62722.4	0.507667	0.411967	0.525567	62722.4	0.459267	0.529067	0.470967	62722.4	0.381567	0.378967	0.362567	62722.4	0.319067	0.233867	0.158167	62722.4	0.610367	0.544467	0.574667	61101.9
					65307.4	0.216158	0.259358	0.230458	61658	0.468389	0.483289	0.447489	61658	0.468389	0.483289	0.447489	63396.8	0.3933	0.3383	0.43	63396.8	0.3825	0.3782	0.3595	63396.8	0.3596	0.3076	0.1958	63396.8	0.5104	0.4115	0.5328	63396.8	0.4557	0.5307	0.4703	63396.8	0.3814	0.378	0.3639	63396.8	0.3172	0.231	0.1548	63396.8	0.6186	0.5347	0.5803	61759
					66002.2	0.21575	0.26025	0.22875	62313.9	0.467378	0.482378	0.446878	62313.9	0.467378	0.482378	0.446878	64071.3	0.38575	0.33915	0.43175	64071.3	0.38155	0.37895	0.35705	64071.3	0.35255	0.32365	0.19045	64071.3	0.50975	0.41005	0.53275	64071.3	0.45615	0.52815	0.47195	64071.3	0.37895	0.38015	0.36695	64071.3	0.32335	0.22645	0.15055	64071.3	0.61525	0.55035	0.57315	62416
					66696.9	0.214492	0.260092	0.228192	62969.8	0.4665	0.4813	0.4451	62969.8	0.4665	0.4813	0.4451	64745.8	0.408267	0.358867	0.429967	64745.8	0.377967	0.377867	0.363467	64745.8	0.377267	0.316667	0.188967	64745.8	0.511967	0.409167	0.523667	64745.8	0.456767	0.530167	0.472167	64745.8	0.381567	0.379267	0.363067	64745.8	0.318767	0.241567	0.147367	64745.8	0.625467	0.490867	0.529867	63073
					67391.7	0.213075	0.259575	0.227575	63625.7	0.465433	0.478133	0.442533	63625.7	0.465433	0.478133	0.442533	65420.2	0.393867	0.371667	0.430067	65420.2	0.379467	0.379267	0.355567	65420.2	0.340467	0.324667	0.182267	65420.2	0.513167	0.413967	0.526767	65420.2	0.456067	0.529967	0.474067	65420.2	0.378567	0.380667	0.362867	65420.2	0.319067	0.233567	0.143067	65420.2	0.626167	0.486067	0.530967	63730
					68086.4	0.211858	0.257758	0.225358	64281.6	0.4628	0.4757	0.4401	64281.6	0.4628	0.4757	0.4401	66094.6	0.40465	0.37435	0.41275	66094.6	0.37495	0.37465	0.35335	66094.6	0.34715	0.31235	0.18305	66094.6	0.51595	0.41105	0.53535	66094.6	0.45805	0.53185	0.47295	66094.6	0.38075	0.38185	0.36445	66094.6	0.32125	0.22525	0.13905	66094.6	0.63195	0.57855	0.57555	64387
					68781.1	0.212533	0.258733	0.224733	64937.5	0.460622	0.472822	0.437422	64937.5	0.460622	0.472822	0.437422	66769.1	0.3827	0.3566	0.431	66769.1	0.3773	0.3685	0.3546	66769.1	0.3451	0.3214	0.1786	66769.1	0.5127	0.4081	0.5378	66769.1	0.4572	0.5318	0.4743	66769.1	0.3853	0.3795	0.3548	66769.1	0.3151	0.2253	0.1336	66769.1	0.6097	0.551	0.5723	65044.7
					69475.9	0.209808	0.256708	0.223708	65593.4	0.461722	0.474322	0.439322	65593.4	0.461722	0.474322	0.439322	67443.5	0.384833	0.353033	0.436033	67443.5	0.373833	0.368133	0.348533	67443.5	0.356033	0.299533	0.173233	67443.5	0.505833	0.407733	0.535733	67443.5	0.452833	0.529633	0.471333	67443.5	0.378533	0.376633	0.352033	67443.5	0.313633	0.223933	0.126933	67443.5	0.629333	0.558333	0.559633	65701.7
					70170.6	0.207608	0.257808	0.220708									68117.9	0.386467	0.382267	0.419467	68117.9	0.371967	0.369567	0.347667	68117.9	0.337867	0.306067	0.170667	68117.9	0.512567	0.410467	0.540167	68117.9	0.455367	0.530267	0.472167	68117.9	0.378867	0.380067	0.365867	68117.9	0.314467	0.224367	0.123367	68117.9	0.616467	0.559267	0.577267	66358.7
					70865.4	0.208592	0.255492	0.216192									68792.3	0.40225	0.35015	0.41545	68792.3	0.37235	0.36335	0.35235	68792.3	0.33685	0.29195	0.16685	68792.3	0.50865	0.40865	0.53955	68792.3	0.45155	0.52935	0.47175	68792.3	0.37575	0.38365	0.36015	68792.3	0.30735	0.21945	0.11905	68792.3	0.64305	0.57195	0.55765	67015.7
					71560.1	0.208633	0.256133	0.220233									69466.8	0.40665	0.34045	0.43145	69466.8	0.36845	0.36265	0.34105	69466.8	0.34895	0.28135	0.16175	69466.8	0.51515	0.40685	0.53795	69466.8	0.45065	0.52935	0.46945	69466.8	0.37775	0.37945	0.36385	69466.8	0.30795	0.22075	0.11535	69466.8	0.60805	0.56255	0.58645	67672.7
																	70141.2	0.401017	0.331217	0.420017	70141.2	0.373417	0.361817	0.341717	70141.2	0.380317	0.277717	0.156917	70141.2	0.511617	0.411317	0.536117	70141.2	0.451617	0.529717	0.470717	70141.2	0.378617	0.375217	0.360117	70141.2	0.309717	0.212317	0.108717	70141.2	0.651017	0.497417	0.533817	68329.7
																	70815.7	0.376683	0.331483	0.433083	70815.7	0.376783	0.362483	0.337783	70815.7	0.336683	0.273083	0.152483	70815.7	0.511983	0.407283	0.537083	70815.7	0.450383	0.530883	0.473783	70815.7	0.381983	0.376983	0.353383	70815.7	0.307283	0.209783	0.105983	70815.7	0.640583	0.576183	0.587983	68986.7
																	71490.1	0.395833	0.351333	0.398833	71490.1	0.364433	0.360633	0.344633	71490.1	0.349933	0.247633	0.145933	71490.1	0.513033	0.405133	0.540833	71490.1	0.447733	0.528333	0.469533	71490.1	0.383233	0.375333	0.363533	71490.1	0.303033	0.209133	0.0994333	71490.1	0.609833	0.585933	0.595233	69643.7
																	72165.3	0.373383	0.374883	0.398583	72165.3	0.367583	0.358583	0.335783	72165.3	0.352183	0.250383	0.139783	72165.3	0.510583	0.407783	0.537983	72165.3	0.448683	0.527483	0.469183	72165.3	0.373383	0.401483	0.367783	72165.3	0.337383	0.202783	0.0961833	72165.3	0.645983	0.578783	0.596183	70300.7
																	72839.7	0.402183	0.350183	0.456283	72839.7	0.364383	0.352883	0.333883	72839.7	0.338883	0.235283	0.133483	72839.7	0.510783	0.404883	0.534083	72839.7	0.446483	0.526583	0.468383	72839.7	0.373383	0.399483	0.367183	72839.7	0.300183	0.208883	0.0922833	72839.7	0.602583	0.588783	0.593883	70957.7
																	73514.1	0.376733	0.355433	0.373833	73514.1	0.355533	0.348833	0.328033	73514.1	0.314733	0.219433	0.124733	73514.1	0.508333	0.403633	0.533533	73514.1	0.439733	0.519433	0.467033	73514.1	0.370733	0.367033	0.346733	73514.1	0.293033	0.205633	0.0862333	73514.1	0.632833	0.580533	0.579433	71614.7
																	74188.6	0.39405	0.38165	0.37195	74188.6	0.35995	0.35175	0.32975	74188.6	0.32505	0.21525	0.11655	74188.6	0.51345	0.40275	0.53045	74188.6	0.44175	0.52315	0.46655	74188.6	0.36905	0.39095	0.34745	74188.6	0.30055	0.19855	0.08425	74188.6	0.63145	0.59395	0.59625	72271.7
																	74863	0.382117	0.321617	0.447117	74863	0.356417	0.348617	0.328617	74863	0.309517	0.210217	0.107617	74863	0.515117	0.400617	0.530517	74863	0.440317	0.520617	0.467417	74863	0.372817	0.367317	0.368317	74863	0.296617	0.193517	0.0816167	74863	0.576017	0.594417	0.591417	72928.7
																	75537.4	0.3819	0.3704	0.4418	75537.4	0.3546	0.3488	0.3224	75537.4	0.3032	0.2044	0.1014	75537.4	0.5147	0.4045	0.5382	75537.4	0.4382	0.5196	0.4627	75537.4	0.3651	0.3709	0.3549	75537.4	0.304	0.1797	0.0782	75537.4	0.5879	0.5561	0.5937	73585.7
																	76211.9	0.368983	0.369383	0.443883	76211.9	0.353283	0.340083	0.324583	76211.9	0.296883	0.199783	0.0933833	76211.9	0.509883	0.399583	0.537883	76211.9	0.435083	0.518183	0.460283	76211.9	0.365483	0.364383	0.346183	76211.9	0.283083	0.176183	0.0750833	76211.9	0.639383	0.583283	0.596183	74242.7
																	76886.3	0.368333	0.334233	0.406433	76886.3	0.350333	0.334733	0.319033	76886.3	0.279833	0.196333	0.0853333	76886.3	0.518133	0.401733	0.547333	76886.3	0.437733	0.517933	0.466133	76886.3	0.366333	0.366433	0.344833	76886.3	0.310733	0.177933	0.0715333	76886.3	0.569933	0.556933	0.602233
																	77560.7	0.36425	0.33035	0.36845	77560.7	0.34685	0.33695	0.30735	77560.7	0.25695	0.18815	0.07475	77560.7	0.51205	0.40085	0.53405	77560.7	0.43685	0.51415	0.46485	77560.7	0.37075	0.38485	0.34185	77560.7	0.28325	0.16225	0.06715	77560.7	0.59445	0.59665	0.59355
																	78235.3	0.363017	0.334917	0.374817	78235.3	0.345617	0.326817	0.303217	78235.3	0.253517	0.186217	0.0655167	78235.3	0.511317	0.399917	0.540617	78235.3	0.438517	0.514417	0.465717	78235.3	0.361017	0.396417	0.365517	78235.3	0.289217	0.163517	0.0649167	78235.3	0.597617	0.562917	0.584417
																	78909.7	0.361667	0.353267	0.391867	78909.7	0.340867	0.323667	0.300267	78909.7	0.240167	0.179967	0.0553667	78909.7	0.513367	0.402667	0.535367	78909.7	0.436967	0.511167	0.462567	78909.7	0.375767	0.358367	0.338467	78909.7	0.270067	0.159767	0.0620667	78909.7	0.575367	0.560767	0.587467
																	79584.1	0.3641	0.3386	0.4087	79584.1	0.3407	0.3252	0.2927	79584.1	0.2339	0.1778	0.0451	79584.1	0.5136	0.4049	0.5286	79584.1	0.4351	0.5101	0.4613	79584.1	0.3729	0.3567	0.3689	79584.1	0.2917	0.1496	0.0593	79584.1	0.5935	0.5704	0.5628
																	80258.6	0.36755	0.31625	0.37945	80258.6	0.33885	0.31915	0.28505	80258.6	0.22905	0.17185	0.03295	80258.6	0.51095	0.40485	0.53755	80258.6	0.43495	0.50875	0.45965	80258.6	0.35555	0.35305	0.37145	80258.6	0.26295	0.14465	0.05665	80258.6	0.53935	0.55665	0.58785
[truncated: 185 more columns]

## Sheet: GFP_OD600
Fig4A	Time [s]	Null-Null_1	Null-Null_2	Null-Null_3	Time [s]	Sa-Null_1	Sa-Null_2	Sa-Null_3	Time [s]	Null-SpyNull_1	Null-SpyNull_2	Null-SpyNull_3	Time [s]	Spy Apo_1	Spy Apo_2	Spy Apo_3	Time [s]	SpyG1_1	SpyG1_2	SpyG1_3	Time [s]	SpyG2_1	SpyG2_2	SpyG2_3	Time [s]	SpyG3_1	SpyG3_2	SpyG3_3	Time [s]	SpyG4_1	SpyG4_2	SpyG4_3	Time [s]	Spy1_1	Spy1_2	Spy1_3	Time [s]	Spy2_1	Spy2_2	Spy2_3	Time [s]	Spy3_1	Spy3_2	Spy3_3	Time [s]	Spy4_1	Spy4_2	Spy4_3	Time [s]
	0	2774.6	2374.19	2843.79	0	2710.37	2459.76	2562.83	0	2774.6	2374.19	2843.79	0	3212.31	3695.99	3703.81	0	1794.7	1559.36	1789.93	0	1021.82	1045.62	1029.88	0	1852.09	1534.8	1637.29	0	1927.42	2141.44	1967.85	0	170.092	153.748	127.029	0	992.039	912.548	951.626	0	1530.38	1403.99	1262.42	0	253.593	248.55	218.182	0
	655.9	2734.29	2268.25	2824.89	655.9	2718.8	2472.92	2663.38	655.9	2734.29	2268.25	2824.89	682.6	2984.25	3491.99	3499.35	674.6	1728.55	1291.15	1755.35	674.6	1026.85	1020.5	978.321	674.6	1799.43	1527.7	1508.89	674.6	1933.73	1792.05	1887.67	674.6	164.245	117.855	126.342	674.6	952.897	896.987	915.631	674.6	1465.01	1353.47	1124.34	674.6	186.113	227.111	199.875	657
	1311.8	2612.27	2254.09	2807.6	1311.8	2621.07	2484.09	2668.75	1311.8	2612.27	2254.09	2807.6	1365.1	2899.33	3242.15	3317.64	1349.1	1809.68	1714.44	1860.35	1349.1	1098.29	1129.73	1091.95	1349.1	1779.49	1597.43	1599.82	1349.1	2000.98	1670.83	1957.42	1349.1	163.288	155.413	164.96	1349.1	977.183	881.596	960.347	1349.1	1427.72	1327.78	1241.13	1349.1	188.067	217.662	152.954	1314
	1967.8	2655.81	2325.87	2804.76	1967.8	2616.26	2566.99	2650.88	1967.8	2655.81	2325.87	2804.76	2047.7	2787.16	3064.55	3164.34	2023.5	1918.63	1894.21	1997.21	2023.5	1263.49	1251.49	1201.35	2023.5	1912.39	1703.08	1732.73	2023.5	2088.75	2105.74	2064.46	2023.5	144.553	167.736	148.227	2023.5	942.456	884.638	904.466	2023.5	1377.08	1340.15	1348.43	2023.5	234.055	194.175	164.809	1971
	2623.7	2753.54	2400.09	2952.51	2623.7	2666.17	2558.7	2628.89	2623.7	2753.54	2400.09	2952.51	2730.2	2722.03	2992.74	3026.03	2697.9	2003.6	2055.05	2153.65	2697.9	1416.15	1437.88	1383.12	2697.9	2029.42	1801.4	1841.61	2697.9	2203.67	2239.05	2128.28	2697.9	117.316	194.658	121.418	2697.9	912.812	857.455	807.198	2697.9	1345.31	1243.55	1240.06	2697.9	196.913	195.045	169.336	2628
	3279.7	2890.79	2492.66	3057.61	3279.7	2627.14	2564.28	2637.81	3279.7	2890.79	2492.66	3057.61	3412.7	2615.75	2846.52	2871.09	3372.3	2184.53	2271.29	2335.82	3372.3	1693.79	1677.2	1559.38	3372.3	2133.54	1951.4	2037.74	3372.3	2337.95	2495.27	2291.12	3372.3	155.106	151.197	186.253	3372.3	884.688	826.109	850.26	3372.3	1294.38	1250.54	1223.95	3372.3	203.587	205.379	201.089	3285
	3935.6	3026.32	2591.74	3244.03	3935.6	2652.35	2521.57	2637.5	3935.6	3026.32	2591.74	3244.03	4095.3	2526.02	2717.9	2766.1	4046.8	2297.65	2339	2509.86	4046.8	1847.08	1855.06	1768.31	4046.8	2319.68	2108.87	2118.46	4046.8	2488.92	2671.78	2509.45	4046.8	157.667	177.538	138.268	4046.8	885.507	751.527	884.026	4046.8	1236	1167.53	1242.18	4046.8	149.582	178.333	177.538	3942
	4591.6	3132.87	2739.55	3344.65	4591.6	2622.54	2472.01	2622.59	4591.6	3132.87	2739.55	3344.65	4777.9	2456.3	2654.22	2650.36	4721.2	2444.14	2582.54	2737.47	4721.2	2096.6	2065.98	1965.7	4721.2	2480.05	2262.96	2289.64	4721.2	2641.15	2886.2	2614.82	4721.2	158.616	137.581	185.46	4721.2	922.078	885.74	832.66	4721.2	1236.48	1172.52	1233.31	4721.2	155.865	183.639	179.469	4599
	5247.5	3253.27	2818.05	3435.22	5247.5	2554.38	2418.43	2544.3	5247.5	3253.27	2818.05	3435.22	5460.4	2417.68	2537.2	2582.02	5395.6	2613.32	2736.91	2882.83	5395.6	2264.9	2223.32	2109.68	5395.6	2600.54	2391.87	2421.69	5395.6	2704.38	3073.76	2764	5395.6	147.206	126.878	110.383	5395.6	893.45	822.707	804.554	5395.6	1211.04	1113.04	1176.9	5395.6	235.831	174.12	187.354	5256
	5903.4	3367.81	2957.98	3562.86	5903.4	2581.05	2357.05	2463.74	5903.4	3367.81	2957.98	3562.86	6143	2291.01	2487.2	2489.12	6070	2729.62	2860.25	3011.62	6070	2418.47	2368.06	2248.34	6070	2734.2	2493.36	2552.11	6070	2891.66	3199.47	2816.3	6070	119.559	156.059	159.875	6070	867.49	812.977	830.413	6070	1124.01	1039.51	1110.73	6070	180.595	167.535	179.02	5913
	6559.3	3501.73	3043.42	3673.38	6559.3	2512.99	2464.72	2561.65	6559.3	3501.73	3043.42	3673.38	6825.5	2248.62	2335.85	2393.09	6744.5	2852.59	3156.92	3182.86	6744.5	2577.78	2611.99	2402.45	6744.5	2854.9	2624.17	2684.75	6744.5	2941.6	3268.54	2938.32	6744.5	135.249	133.668	120.172	6744.5	881.196	841.424	840.665	6744.5	1089.57	1046.83	1082.13	6744.5	202.224	168.599	177.778	6570
	7215.2	3641.68	3185.53	3829.79	7215.2	2528.98	2460.21	2522.31	7215.2	3641.68	3185.53	3829.79	7508.1	2139.28	2262.26	2334.54	7418.9	2988.45	3404.13	3313.72	7418.9	2761.03	2729.19	2564.94	7418.9	2998.79	2698.66	2757.76	7418.9	3112.21	3644.97	3066.19	7418.9	134.96	134.96	150.298	7418.9	879.823	826.278	845.418	7418.9	1076.44	1033.21	1086.08	7418.9	183.37	191.356	178.323	7227
	7871.1	3719.24	3219.18	3890.37	7871.1	2508.55	2414.73	2484.54	7871.1	3719.24	3219.18	3890.37	8190.6	2133.43	2223.69	2234.12	8093.3	3059.58	3562.96	3422.13	8093.3	2819.8	2800.69	2621.96	8093.3	3083.24	2772.79	2822.66	8093.3	3087.26	3812.6	3036.48	8093.3	121.284	120.085	121.284	8093.3	843.814	814.861	822.036	8093.3	1049.06	1000.27	1079.26	8093.3	166.132	174.686	147.097	7884
	8527	3763	3295.57	3934.87	8527	2460.52	2352.63	2416.35	8527	3763	3295.57	3934.87	8873.2	2059.68	2172.05	2153.15	8767.7	3146.09	3632.48	3566.87	8767.7	2964.57	2911.49	2754.71	8767.7	3164.22	2848.66	2936.93	8767.7	3289.67	4013.13	3102.46	8767.7	141.612	113.832	127.375	8767.7	862.366	801.282	808.983	8767.7	1016.99	983.814	1038.57	8767.7	177.596	190.392	172.246	8541
	9182.9	3921.29	3399.07	4089.59	9182.9	2447.59	2430.67	2470.55	9182.9	3921.29	3399.07	4089.59	9555.7	1974.46	2128.69	2030.1	9442.1	3208.9	3755.8	3627.67	9442.1	3076.69	3032.45	2821.87	9442.1	3235.18	2862.5	2961.89	9442.1	3220.23	4207.2	3069.78	9442.1	116.046	125.49	124.611	9442.1	859.692	786.579	814.365	9442.1	979.841	956.48	993.24	9442.1	180.319	174.292	169.794	9198
	9838.8	3941.82	3434.47	4178.08	9838.8	2432.94	2423.58	2431.37	9838.8	3941.82	3434.47	4178.08	10238.3	1907.05	2067.74	1962.85	10116.6	3294.3	3967.39	3696.16	10116.6	2992.84	2974.39	2869.09	10116.6	3228.89	2930.27	2990.04	10116.6	3192.79	4303.04	3002.1	10116.6	134.043	120.115	129.616	10116.6	853.799	791.237	817.056	10116.6	964.411	938.914	1005.99	10116.6	189.813	201.736	165.48	9855
	10494.7	3999.83	3407.33	4183.78	10494.7	2477.64	2325.73	2367.78	10494.7	3999.83	3407.33	4183.78	10920.8	1879.33	2052.73	1915.32	10791	3314.46	3971.08	3763.54	10791	3222.75	3073.23	2884.15	10791	3200.42	2936.81	2845.47	10791	3071.64	4548.49	2887.38	10791	122.094	120.046	128.393	10791	842.767	784.456	799.01	10791	926.504	906.005	985.78	10791	190.029	189.585	165.209	10512
	11150.7	4061.4	3489.21	4288.43	11150.7	2377.61	2371.1	2398.93	11150.7	4061.4	3489.21	4288.43	11603.4	1754.71	1935.27	1818.18	11465.4	3293.82	3947.66	3810.33	11465.4	3243.79	3040.75	2949.42	11465.4	3305.37	2995.28	2722.61	11465.4	2987.27	4754.99	2631.29	11465.4	115.248	105.448	104.439	11465.4	828.343	758.808	809.102	11465.4	913.349	891.566	948.509	11465.4	176.101	176.63	152.505	11169
	11806.6	4223.16	3640.93	4438.4	11806.6	2384.06	2358.31	2380.13	11806.6	4223.16	3640.93	4438.4	12286	1706.76	1960.68	1787.25	12139.9	3397.58	4072.9	3899.88	12139.9	3171.91	2852.1	2963.31	12139.9	3310.87	3122.56	2666.54	12139.9	3059.14	4866.45	2629.23	12139.9	125.122	114.022	119.633	12139.9	814.187	795.622	806.802	12139.9	906.244	846.309	975.504	12139.9	176.713	191.612	163.795	11826
	12462.6	4296.35	3628.3	4434.05	12462.6	2406.15	2345.84	2414.97	12462.6	4296.35	3628.3	4434.05	12968.5	1756.33	1899.17	1709.49	12814.3	3261.34	4192.43	3675.93	12814.3	3127.82	2870.74	2990.36	12814.3	3245.86	2923.97	2662.49	12814.3	3071.16	4893.23	2585.62	12814.3	111.206	101.931	115.407	12814.3	786.517	810.072	819.851	12814.3	857.24	834.321	911.356	12814.3	177.493	169.695	159.566	12483
	13118.5	4275.43	3685.47	4463.61	13118.5	2432.83	2377.09	2353.42	13118.5	4275.43	3685.47	4463.61	13651	1670.22	1827.3	1709.99	13488.7	3285.79	4333.48	3735.54	13488.7	3069.78	2734.28	2869.51	13488.7	3403.79	3146.95	2651.1	13488.7	3178.36	4964.64	2496.1	13488.7	115.594	97.6957	110.65	13488.7	765.069	796.184	832.055	13488.7	840.784	832.912	922.457	13488.7	170.52	183.624	144.746	13140
	13775.1	4347.22	3775.96	4555.45	13775.1	2422	2400.93	2285.71	13775.1	4347.22	3775.96	4555.45	14333.6	1673.69	1777.51	1676.93	14163.1	3194.7	4519.86	3631.87	14163.1	3054.88	2858.39	2842.11	14163.1	3191.15	2978.43	2712	14163.1	3189.84	4954.06	2647.62	14163.1	105.315	96.503	113.312	14163.1	787.488	772.805	814.661	14163.1	805.736	804.509	883.132	14163.1	162.663	176.945	137.136	13797
	14431	4397	3828.53	4630.39	14431	2403.57	2387.38	2289.52	14431	4397	3828.53	4630.39	15016.2	1628.23	1642.49	1528.48	14837.6	3097.91	4610.73	3705.38	14837.6	3194.04	2965.05	2809.95	14837.6	3116.76	2939.14	2677.33	14837.6	3262.54	5003.12	2718.1	14837.6	105.205	102.426	109.489	14837.6	804.02	766.962	793.358	14837.6	752.177	771.93	877.378	14837.6	162.811	177.34	140.575	14454
	15086.9	4205.99	3686.33	4395.87	15086.9	2424.77	2311.94	2237.65	15086.9	4205.99	3686.33	4395.87	15698.7	1600.81	1649.96	1569.65	15512	3114.07	4891.36	3867.56	15512	3279.39	3145.75	2809.98	15512	2937.55	3149.21	2743.33	15512	3290.77	5105.59	2839.07	15512	114.315	91.5982	96.5018	15512	809.917	783.629	796.824	15512	753.286	767.671	918.437	15512	161.966	202.468	136.959	15111
	15742.8	4323.52	3766.09	4476.35	15742.8	2428.72	2327.48	2291.04	15742.8	4323.52	3766.09	4476.35	16381.3	1622.87	1665.32	1604.03	16186.4	3073.86	4875.29	3935.74	16186.4	3397.27	3198.26	2876.23	16186.4	2989.66	3096.44	2822.76	16186.4	3353.06	5011.35	2818.34	16186.4	106.972	89.8516	94.9175	16186.4	832.857	791.975	815.331	16186.4	728.308	779.167	1047.01	16186.4	178.03	172.135	140.298	15768
	16398.7	4245.23	3655.26	4114.26	16398.7	2410.41	2374.02	2246.54	16398.7	4245.23	3655.26	4114.26	17063.8	1632.24	1677.22	1591.73	16860.8	3056.34	4892.52	3880.03	16860.8	3410.24	3299.19	2883.12	16860.8	2868.94	2987.04	2797.43	16860.8	3439.72	4897.98	2848.36	16860.8	109.722	86.8373	93.8121	16860.8	820.944	761.024	800.261	16860.8	737.883	778.314	1012.09	16860.8	174.783	156.889	111.772	16425.1
	17054.7	4375.98	3714.48	4367.03	17054.7	2368.69	2340.84	2273.15	17054.7	4375.98	3714.48	4367.03	17746.4	1629.96	1700.32	1508.16	17535.2	3108.88	5039.39	3990.22	17535.2	3498.81	3385.24	2967.92	17535.2	2881.2	2956.27	2888.9	17535.2	3618.69	4989.1	2920.4	17535.2	108.94	99.4126	105.399	17535.2	836.067	803.29	805.989	17535.2	761.416	793.749	1013.64	17535.2	166.46	176.143	126.399	17082.1
	17710.6	4274.18	3686.88	4618.52	17710.6	2248.79	2396.83	2323.61	17710.6	4274.18	3686.88	4618.52	18428.9	1753.04	1677.46	1573.22	18209.7	3129.15	4993.62	3956.83	18209.7	3623.53	3561.74	3025.95	18209.7	2998.01	3011.7	3088.78	18209.7	3854.11	4992.29	2952.46	18209.7	108.682	95.6442	104.075	18209.7	841.028	794.224	814.745	18209.7	734.547	755.732	947.841	18209.7	178.312	179.699	128.836	17739.1
	18366.5	4334.45	3794.11	4184.03	18366.5	2184.08	2413.2	2364.49	18366.5	4334.45	3794.11	4184.03	19111.5	1705.9	1636.99	1550.27	18884.1	3346.27	5009.54	4246.28	18884.1	3738.63	3606.15	3107.4	18884.1	3136.15	3137.02	3264.43	18884.1	4039.32	5088.79	3072.96	18884.1	111.579	94.9435	104.177	18884.1	851.022	802.484	830.138	18884.1	733.685	734.211	868.15	18884.1	166.699	174.881	130.012	18396.1
	19022.4	4534.76	4011.28	4250.73	19022.4	2221.31	2402.66	2328.56	19022.4	4534.76	4011.28	4250.73	19794	1777.34	1641.87	1587.62	19558.5	3592.08	5068.7	4471.15	19558.5	3855.42	3684.21	3314.11	19558.5	3311.17	3273.47	3370.39	19558.5	4056.98	5225.51	3147.34	19558.5	111.197	90.391	107.376	19558.5	852.699	812.098	848.003	19558.5	709.193	722.377	806.326	19558.5	171.834	168.919	133.457	19053.1
	19678.3	4628.51	3981.49	4079.33	19678.3	2156.44	2499.33	2218.4	19678.3	4628.51	3981.49	4079.33	20476.6	1790.96	1684.03	1661.06	20232.9	3899.62	5232.95	4526.92	20232.9	3919.78	3711.29	3400.45	20232.9	3395.92	3329.26	3698.45	20232.9	4289.71	5370.47	3304.86	20232.9	123.38	91.4377	112.974	20232.9	871.426	818.867	861.14	20232.9	702.258	712.816	789.474	20232.9	183.127	179.622	134.172	19710.1
	20334.2	4714.92	3989.58	4131.58	20334.2	2120.33	2412.93	2246.5	20334.2	4714.92	3989.58	4131.58	21159.1	1774.92	1674.15	1649.73	20907.4	4061.06	5043.3	4595.07	20907.4	3914.36	3688.32	3446.14	20907.4	3530.54	3505.57	3748.86	20907.4	4342.34	5473.23	3402.19	20907.4	125.86	88.0305	118.855	20907.4	872.379	811.51	857.979	20907.4	693.748	707.424	783.542	20907.4	178.71	181.923	137.137	20367.1
	20990.1	4614.81	4049.24	4184.01	20990.1	2095.2	2360.03	2424.84	20990.1	4614.81	4049.24	4184.01	21841.7	1783.04	1666.47	1649.7	21581.8	4360.27	5102.96	4782.01	21581.8	4012.59	3708.39	3555.65	21581.8	3795.49	3742.56	4180.51	21581.8	4524.1	5671.09	3468.64	21581.8	144.322	95.2831	125.872	21581.8	902.984	834.292	898.084	21581.8	699.169	720.704	799.906	21581.8	188.103	185.272	140.128	21024.1
	21646	4649.7	4064.75	4213.27	21646	2104.24	2323.91	2442.85	21646	4649.7	4064.75	4213.27	22524.2	1765.6	1662.3	1705.82	22256.2	4591.64	5119.9	5132.44	22256.2	4038.88	3713.54	3596.2	22256.2	3893.43	3827.22	4169.02	22256.2	4432.9	5782.37	3547.44	22256.2	135.94	93.9224	125.396	22256.2	913.403	843.71	902.468	22256.2	687.866	701.067	784.686	22256.2	185.258	188.443	137.927	21681.1
	22302	4635.66	4088.51	4351.16	22302	2107.66	2299.12	2457.81	22302	4635.66	4088.51	4351.16	23206.8	1810.14	1696.82	1769.76	22930.6	4797.46	5154.47	5218.72	22930.6	3976.43	3678.17	3637.63	22930.6	3937.48	3861.68	4174.56	22930.6	4328.17	5835.73	3614.18	22930.6	143.127	98.1997	126.776	22930.6	899.157	848.736	927.782	22930.6	684.054	700.086	783.003	22930.6	189.233	188.742	140.92	22338.1
	22957.9	4621.01	4013.08	4336.73	22957.9	2152.02	2314.78	2564.92	22957.9	4621.01	4013.08	4336.73	23889.3	1799.89	1720.42	1760.81	23605.1	4857.6	5206.82	5270.76	23605.1	3942.86	3652.05	3650.76	23605.1	4009.92	3927.23	4182.68	23605.1	4425.67	5983.01	3715.18	23605.1	164.36	105.382	135.286	23605.1	921.424	859.025	956.668	23605.1	691.054	705.253	797.688	23605.1	191.27	196.791	151.717	22995.1
	23613.8	4560.97	3965.75	4229.41	23613.8	2174.82	2316.68	2668.14	23613.8	4560.97	3965.75	4229.41	24571.9	1811.54	1741.08	1750.21	24279.5	4919.85	5226.52	5257.15	24279.5	3980.04	3603.05	3743.19	24279.5	4113.89	4326.57	4153.5	24279.5	4476.92	6096.24	3781.2	24279.5	168.909	103.532	134.312	24279.5	936.271	893.252	991.587	24279.5	692.679	706.544	803.508	24279.5	194.747	200.478	160.46	23652.1
	24269.7	4570.66	4024.38	4280.31	24269.7	2257.99	2416.3	2701.65	24269.7	4570.66	4024.38	4280.31	25254.4	1775.08	1759.79	1709.29	24953.9	4912.1	5229.63	5247.75	24953.9	4067.42	3615.64	3759.33	24953.9	4102.17	4362.6	4161.58	24953.9	4446.98	6083.69	3884.17	24953.9	166.162	107.693	136.618	24953.9	960.017	906.135	1001.96	24953.9	688.44	705.401	801.882	24953.9	197.742	199.751	172.31	24309.1
	24925.8	4495.38	3999.08	4237.19	24925.8	2316.69	2530.92	2781.95	24925.8	4495.38	3999.08	4237.19	25937	1766.13	1789.08	1696.38	25628.3	4957.34	5281.43	5295.38	25628.3	4655.54	3639.19	3988.98	25628.3	4629.42	4379.01	4169.86	25628.3	4590	6193.65	4058.94	25628.3	174.953	110.259	140.483	25628.3	979.407	932.92	1046.88	25628.3	697.889	734.837	822.378	25628.3	211.165	210.39	201.314	24966.1
	25581.6	4451.23	3989.98	4166.63	25581.6	2398.39	2596.39	2864.93	25581.6	4451.23	3989.98	4166.63	26619.5	1857.14	1806.23	1747.96	26302.8	4920.49	5263.37	5247.81	26302.8	4619.25	3594.83	4294.05	26302.8	4606.26	4375.45	4148.08	26302.8	4452.27	6215.78	4051.03	26302.8	177.606	111.194	144.977	26302.8	985.896	955.775	1079.26	26302.8	699.378	743.634	829.618	26302.8	211.182	210.439	202.647	25623.8
	26237.6	4490.35	3989.35	4149.8	26237.6	2538.21	2614.4	2888.97	26237.6	4490.35	3989.35	4149.8	27302.1	1921.76	1795.86	1821.09	26977.2	4869.42	5210.48	5129.28	26977.2	4521.19	3541.77	4239.39	26977.2	4532.82	4305.61	4093.09	26977.2	4430.82	6228.22	4111.01	26977.2	177.763	110.918	145	26977.2	997.174	966.229	1099	26977.2	690.763	729.401	821.609	26977.2	210.158	212.85	200.272	26280.9
	26893.6	4448.87	4012.45	4114.74	26893.6	2616.89	2693.66	2881.95	26893.6	4448.87	4012.45	4114.74	27984.7	1956.08	1778.63	1767.19	27651.6	4852.29	5192.01	5115.88	27651.6	4484.81	3548.14	4198.16	27651.6	4514.8	4274.14	4061.47	27651.6	4443.93	6228.19	4127.18	27651.6	180.838	113.685	147.353	27651.6	1003.54	986.812	1131.91	27651.6	697.4	746.667	834.725	27651.6	218.579	225.708	208.127	26937.9
	27549.5	4409.79	4102.59	4128.21	27549.5	2714.54	2717.31	2935.66	27549.5	4409.79	4102.59	4128.21	28668	1961.96	1873.55	1843.51	28326	4821.98	5183.27	5096.61	28326	4453.28	3585.37	4177.38	28326	4519.98	4268.65	4059.94	28326	4520.99	6202.46	4126.84	28326	183.026	117.802	151.659	28326	1019.35	1008.09	1166.93	28326	697.569	758.183	857.953	28326	223.093	230.253	213.485	27594.9
	28205.4	4498.05	4143.11	4161.4	28205.4	2807.44	2839.01	3035.82	28205.4	4498.05	4143.11	4161.4	29350.5	1983.29	1903.49	1837.78	29000.5	4802.31	5182.6	5067.69	29000.5	4415.88	3578.1	4147.75	29000.5	4497.22	4232.47	4029.42	29000.5	4386.77	6164.43	4130.99	29000.5	180.009	115.269	153.462	29000.5	1037.87	1031.2	1196.22	29000.5	703.229	770.772	864.841	29000.5	228.094	238.622	216.236	28251.9
	28861.4	4526.58	4208.72	4183.28	28861.4	2922.79	3009.13	3096.08	28861.4	4526.58	4208.72	4183.28	30033.1	2035.76	1924.83	1868.26	29674.9	4785.9	5153.8	5043.39	29674.9	4356.76	3625.32	4097.44	29674.9	4433.09	4210.62	3997.26	29674.9	4394.52	6134.73	4163.51	29674.9	185.898	120.444	159.944	29674.9	1046.87	1048.98	1232.33	29674.9	709.224	775.692	881.833	29674.9	231.442	237.901	225.174	28908.9
	29517.4	4651.94	4298.11	4254.57	29517.4	3085.82	3157.33	3163.47	29517.4	4651.94	4298.11	4254.57	30715.6	2067.53	1956.23	1899.47	30349.3	4743.43	5131.03	5009.61	30349.3	4299.08	4094.66	4063.6	30349.3	4410.01	4168.87	3975.83	30349.3	4328.17	6044.32	4209.27	30349.3	187.93	119.687	161.166	30349.3	1058.52	1071.26	1254.89	30349.3	702.441	788.721	893.747	30349.3	235.609	242.15	226.987	29565.9
	30173.3	5129.32	4380.51	4230.37	30173.3	3261.29	3313.67	3232.93	30173.3	5129.32	4380.51	4230.37	31398.2	2144.95	2038.64	1994.62	31023.7	4746.15	5125.38	4998.64	31023.7	4285.86	4118.13	4041.3	31023.7	4414.15	4172.71	3983.8	31023.7	4313.54	6005.27	4148.6	31023.7	189.726	125.283	161.064	31023.7	1067.69	1078.33	1283.86	31023.7	714.329	795.681	904.7	31023.7	235.68	252.064	224.791	30222.9
	30829.2	5118.97	4471.02	4354.41	30829.2	3309.52	3389.56	3267.64	30829.2	5118.97	4471.02	4354.41	32080.7	2170.84	2017.75	1964.07	31698.9	4704.62	5087.55	4957.27	31698.9	4259.65	4077.85	4000.11	31698.9	4389.13	4164.67	3936.05	31698.9	4252.84	5969.92	4165.7	31698.9	191.845	122.706	168.758	31698.9	1086.92	1104.79	1312.26	31698.9	709.073	805.283	921.647	31698.9	244.629	253.39	232.986	30879.9
	31485.1	5109.75	4912.31	4425.15	31485.1	3410.97	3503.99	3319.83	31485.1	5109.75	4912.31	4425.15	32763.3	2164.18	2082.13	2078.17	32373.3	4707.64	5092.75	4947.42	32373.3	4232.54	4060.24	3979.45	32373.3	4371.18	4121.33	3901.48	32373.3	4333.03	5901.53	4157.5	32373.3	192.195	126.723	172.372	32373.3	1100.72	1119.39	1343.96	32373.3	713.108	812.098	926.424	32373.3	252.575	266.06	237.322	31536.9
	32141	5110.31	4909.56	4574.51	32141	3532.31	3695.21	3430.44	32141	5110.31	4909.56	4574.51	33445.8	2196	2089.41	2041.41	33047.7	4698.78	5087.96	4925.15	33047.7	4194.79	4049.4	3962.54	33047.7	4350.6	4121.15	3879.66	33047.7	4275.11	5813.58	4240.38	33047.7	196.945	129.374	176.508	33047.7	1100.61	1131.55	1377.37	33047.7	723.508	827.458	947.772	33047.7	256.951	271.602	238.984	32193.9
	32796.9	5117.39	4922.5	4620.56	32796.9	3597.9	3923.98	3494.74	32796.9	5117.39	4922.5	4620.56	34128.4	2269.92	2125.74	2096.63	33722.1	4641.94	5045.65	4879.19	33722.1	4155.37	3994.49	3923.55	33722.1	4307	4077.17	3868.41	33722.1	4272.93	5827.9	4265.18	33722.1	196.664	132.184	183.844	33722.1	1120.73	1155.05	1394.24	33722.1	723.714	841.89	962.651	33722.1	259.586	269.866	242.466	32850.9
	33452.8	5092.84	4887.35	5046.5	33452.8	3710.93	3979.58	3542.91	33452.8	5092.84	4887.35	5046.5	34811	2274.88	2172.92	2115.32	34396.6	4631.53	4997.93	4847.07	34396.6	4098.9	3939.8	3862.17	34396.6	4262.59	4021.59	3822.33	34396.6	4204.18	5838.86	4175.8	34396.6	203.008	139.476	183.787	34396.6	1123.57	1171.35	1405.75	34396.6	722.213	844.211	967.768	34396.6	263.368	279.004	248.504	33507.9
	34108.9	5111.28	4918.83	5042.03	34108.9	3790.06	4094.53	3617.81	34108.9	5111.28	4918.83	5042.03	35493.5	2307.18	2255.08	2256.5	35071	4592.33	4985.41	4822.48	35071	4078.27	3924.71	3860.06	35071	4258.53	4016.38	3815.35	35071	4138.91	5799.2	4268.66	35071	195.198	151.637	184.638	35071	1121.56	1186.61	1424.31	35071	729.155	853.595	994.448	35071	263.785	277.423	244.789	34164.9
	34764.7	5095.48	4922.72	5057.37	34764.7	3839.95	4168.39	3693.59	34764.7	5095.48	4922.72	5057.37	36176	2296.1	2216.92	2219.88	35745.4	4586.42	4935.78	4826.41	35745.4	4060.63	3910.15	3839.47	35745.4	4237.69	3980.03	3797.76	35745.4	4193.79	5821.61	4219.84	35745.4	199.333	153.8	190.514	35745.4	1150.46	1176.68	1447.43	35745.4	726.306	867.551	1000	35745.4	269.311	286.609	255.282	34821.9
	35420.7	5142.58	4975.94	5086.76	35420.7	4001.55	4282.39	3809.73	35420.7	5142.58	4975.94	5086.76	36858.6	2374.52	2236.85	2298.8	36419.8	4549.65	4896.9	4754.84	36419.8	4025.71	3874.61	3791.7	36419.8	4219.05	3980.73	3787.08	36419.8	4134.62	5789.14	4348.39	36419.8	199.795	155.154	213.574	36419.8	1164.91	1189.99	1464.99	36419.8	737.974	874.721	1013.78	36419.8	272.407	294.505	251.137	35478.9
	36076.6	5125.07	4952.53	5039.62	36076.6	4057	4311.7	3838.08	36076.6	5125.07	4952.53	5039.62	37541.2	2414.89	2301.99	2330.96	37094.3	4556.18	4809.03	4776.26	37094.3	4020.32	3869.2	3795.27	37094.3	4213.48	3976.9	3799.68	37094.3	4169.3	5744.79	4331.04	37094.3	200.914	159.308	213.991	37094.3	1140.68	1204.69	1479.11	37094.3	737.497	879.086	1030.29	37094.3	272.402	293.004	257.896	36135.9
	36732.5	5103.55	4901.22	4993.81	36732.5	4054.71	4365.05	3874.03	36732.5	5103.55	4901.22	4993.81	38223.7	2379.42	2291.59	2299.23	37768.7	4525.45	4711.43	4737.31	37768.7	3963.95	3817.66	3739.8	37768.7	4185.66	3932.02	3769.7	37768.7	4303.76	5725.04	4306.05	37768.7	202.482	158.73	214.928	37768.7	1154.03	1222.58	1504.03	37768.7	737.559	890.788	1034.98	37768.7	275.182	302.519	260.018	36792.9
	37388.4	5099.49	4931.55	5020.19	37388.4	4153.4	4446.83	3954.34	37388.4	5099.49	4931.55	5020.19	38906.3	2543.89	2361.41	2264.98	38443.1	4493.36	4749.61	4685.21	38443.1	3930.57	3783.74	3720.87	38443.1	4156.59	3945.21	3769.69	38443.1	4238.31	5618.29	4267.38	38443.1	208.593	160.536	220.585	38443.1	1144.47	1244.26	1507.31	38443.1	729.194	889.041	1052.26	38443.1	275.398	298.363	258.39	37449.9
	38044.3	5135.43	4958.04	5016.52	38044.3	4176.9	4551.52	4023.31	38044.3	5135.43	4958.04	5016.52	39588.8	2608.87	2336.57	2337.98	39117.5	4456.36	4650.62	4641.52	39117.5	3909.43	3769.1	3698.79	39117.5	4195	3957.01	3769.07	39117.5	4274.62	5638.38	4271.98	39117.5	205.104	160.843	218.122	39117.5	1156.12	1228.28	1517.94	39117.5	729.536	907.277	1060.33	39117.5	274.642	308.196	267.624	38106.9
	38700.2	5083.12	4940.89	5019.82	38700.2	4262.82	4593.49	4080.87	38700.2	5083.12	4940.89	5019.82	40271.4	2713.62	2328.89	2349.78	39792	4449.54	4660.58	4639.32	39792	3891.18	3756.11	3672.59	39792	4164	3877.09	3720.96	39792	4219.91	5598.15	4179.09	39792	207.519	161.227	217.327	39792	1172.28	1246.4	1546.84	39792	749.501	915.935	1066.98	39792	275.717	312.6	268.863	38763.9
	39356.1	5029.39	4907.29	4957.2	39356.1	4252.33	4596.26	4095	39356.1	5029.39	4907.29	4957.2	40953.9	3110.7	2366.77	2389.53	40466.4	4394.79	4569.64	4611.38	40466.4	3861.75	3708.66	3629.79	40466.4	4079.43	3874.91	3692.05	40466.4	4256	5833.79	4211.91	40466.4	205.287	160.971	221.143	40466.4	1172.12	1255.94	1543.01	40466.4	733.564	914.536	1079.4	40466.4	278.373	311.296	270.648	39420.9
	40012	5116.74	4956.81	5013.28	40012	4294.27	4669.07	4180.99	40012	5116.74	4956.81	5013.28	41636.5	3108.22	2320.11	2415.94	41140.8	4377.87	4514.46	4552.7	41140.8	3830.73	3671.47	3584	41140.8	4115.43	3873.14	3662.76	41140.8	4272.58	5506.09	4056.85	41140.8	204.324	161.933	221.141	41140.8	1161.12	1264.36	1535.33	41140.8	731.695	906.923	1088.7	41140.8	274.62	313.252	259.205	40077.9
	40668	5038.16	4922.8	4962.19	40668	4296.48	4696.67	4187.6	40668	5038.16	4922.8	4962.19	42319	3119.73	2445.53	2420.13	41815.2	4324.22	4538.88	4495.7	41815.2	3778.53	3620.49	3546.77	41815.2	4024.53	3802.52	3646.45	41815.2	4349.43	5505.73	4062.71	41815.2	204.436	163.461	221.244	41815.2	1166.22	1259.98	1558.3	41815.2	731.414	923.623	1094.86	41815.2	274.251	321.303	273.745	40734.9
	41323.9	5078.73	4967.68	5016.4	41323.9	4385.53	4754.64	4277.68	41323.9	5078.73	4967.68	5016.4	43001.6	3139.45	2472.43	2541.95	42489.7	4368.31	4494.75	4488.47	42489.7	3774.23	3657.38	3553.35	42489.7	4050.83	3801.41	3634.35	42489.7	4573.79	5746.85	4143.08	42489.7	206.094	167.598	222.85	42489.7	1174.3	1260.71	1587.91	42489.7	737.654	936.808	1109.36	42489.7	283.148	327.971	276.901	41391.9
	41979.8	5064	4937.42	4954.68	41979.8	4393.83	4797.86	4298.79	41979.8	5064	4937.42	4954.68	43684.1	3155.15	2663.8	2642.64	43164.1	4302.4	4494.18	4477.48	43164.1	3723.98	3574.59	3510.6	43164.1	4036.61	3810.05	3605.92	43164.1	4912.42	5452.12	4036.57	43164.1	210.404	165.133	221.85	43164.1	1154.08	1246.27	1589.53	43164.1	732.971	932.012	1114.25	43164.1	281.508	326.746	278.068	42048.9
	42635.7	5048.36	4931.35	4939.88	42635.7	4393.38	4812.6	4341.06	42635.7	5048.36	4931.35	4939.88	44366.7	3184.14	2940.6	2619.07	43838.5	4288.13	4545.87	4394.34	43838.5	3692.64	3577.31	3486.73	43838.5	3948.24	3748.19	3632.57	43838.5	4950.02	5509.77	4130.83	43838.5	206.035	167.228	228.877	43838.5	1167.49	1259.29	1623.57	43838.5	737.663	940.739	1128.85	43838.5	283.669	331.537	280.825	42705.9
	43291.6	5056.45	4930.53	4961	43291.6	4366.4	4836.42	4393.42	43291.6	5056.45	4930.53	4961	45049.3	3176.14	3173.74	2732.79	44512.9	4285.52	4322.54	4359.67	44512.9	3654.54	3578.8	3482.6	44512.9	3973.13	3757.81	3660.67	44512.9	4955.56	5450.26	4172.15	44512.9	211.951	169.347	224.459	44512.9	1160.07	1269.99	1637.52	44512.9	738.572	972.292	1132.03	44512.9	288.419	341.499	288.217	43362.9
	43947.5	5024.66	4887.97	4895.8	43947.5	4390.21	4817.2	4394.78	43947.5	5024.66	4887.97	4895.8	45731.8	3177.01	3184.1	2814.49	45187.3	4259.42	4357.06	4379.13	45187.3	3692.62	3553.82	3464.46	45187.3	3943.73	3701.22	3599.6	45187.3	4870.94	5481.49	4059.81	45187.3	211.238	168.016	224.12	45187.3	1179.6	1266.64	1618.6	45187.3	736.228	958.676	1147.97	45187.3	283.801	331.64	284.551	44019.9
	44603.4	5033.48	4907.87	4895.76	44603.4	4417.38	4853.42	4459.5	44603.4	5033.48	4907.87	4895.76	46414.3	3239.11	3211.44	3265.86	45861.8	4198.77	4353.73	4365.54	45861.8	3630.77	3512.23	3456.98	45861.8	3937.26	3715.41	3583.41	45861.8	4886.86	5488.93	4111.63	45861.8	214.189	170.168	229.126	45861.8	1158.52	1266.85	1629.69	45861.8	725.703	958.418	1145.86	45861.8	288.939	340.153	287.816	44676.9
	45259.3	4994.14	4889.68	4869.27	45259.3	4402.16	4820.01	4453.3	45259.3	4994.14	4889.68	4869.27	47096.9	3220.92	3199.9	3302.54	46536.2	4126.55	4332.87	4351.99	46536.2	3640.72	3537.96	3416.96	46536.2	3916.15	3742.25	3553.6	46536.2	4878.32	5675.8	4074.84	46536.2	215.021	172.936	230.568	46536.2	1163.33	1291.56	1656.82	46536.2	746.378	1011.12	1179.6	46536.2	293.171	341.414	289.391	45333.9
	45915.2	4959.31	4848.84	4838.49	45915.2	4436.9	4833.39	4492.88	45915.2	4959.31	4848.84	4838.49	47779.5	3221.38	3176.63	3256.12	47210.6	4220.27	4314.74	4342.71	47210.6	3599.07	3476.55	3422.38	47210.6	3902.01	3729.93	3569.97	47210.6	4820.87	5752.12	4119.66	47210.6	220.085	172.228	230.51	47210.6	1183.02	1310.18	1656.47	47210.6	765.474	1000.25	1186.52	47210.6	300.18	349.061	294.161	45990.9
	46571.1	4985.74	4881.8	4875.52	46571.1	4424.22	4854.39	4541.03	46571.1	4985.74	4881.8	4875.52	48462	3228.9	3161.73	3249.48	47885	4160.05	4318.59	4268.61	47885	3572.57	3434.01	3376.46	47885	3916.05	3707	3599.93	47885	4811.1	5412.48	4134.72	47885	218.037	171.205	231.155	47885	1176.71	1271.67	1641.03	47885	745.177	994.382	1191.17	47885	296.789	349.274	292.956	46647.9
	47227	4933.02	4838.09	4789.17	47227	4447.51	4815.04	4509.41	47227	4933.02	4838.09	4789.17	49144.6	3233.81	3174.85	3288.04	48559.5	4174.54	4243.41	4188.72	48559.5	3543.7	3441.55	3331.96	48559.5	3871.53	3682.15	3543.66	48559.5	4797.84	5414.69	4146.86	48559.5	218.455	175.807	233.164	48559.5	1182.23	1284.04	1670.53	48559.5	761.574	997.562	1202.64	48559.5	300.894	350.315	294.085	47304.9
	47883	4947.34	4853.36	4810.22	47883	4402.02	4821.72	4542.54	47883	4947.34	4853.36	4810.22	49827.1	3260.05	3190.73	3302.19	49233.9	4059.44	4216.96	4137.71	49233.9	3496.57	3379.41	3337.48	49233.9	3831.36	3610.34	3553.98	49233.9	4756.44	5577.69	4172.38	49233.9	218.326	175.282	231.116	49233.9	1169.41	1299.86	1680.5	49233.9	753.275	1016.15	1213.38	49233.9	286.877	348.326	296.784	47961.9
	48538.9	4897.37	4806.59	4785.22	48538.9	4386.33	4808.7	4537.26	48538.9	4897.37	4806.59	4785.22	50509.7	3226.33	3149.14	3302.28	49908.3	4115.37	4242.78	4117.25	49908.3	3545.24	3409.84	3303	49908.3	3857.13	3658.18	3596.23	49908.3	4796.19	5284.29	4275.65	49908.3	220.965	173.254	234.063	49908.3	1175.57	1303.65	1660.11	49908.3	764.222	1015.69	1227.81	49908.3	302.207	351.73	304.361	48618.9
	49194.8	4888.29	4803.89	4775.17	49194.8	4395.19	4802.21	4551.05	49194.8	4888.29	4803.89	4775.17	51192.2	3211.49	3182.34	3304.34	50582.7	4069.83	4146.16	4020.89	50582.7	3469.72	3385.67	3318.76	50582.7	3833.88	3622.38	3574.37	50582.7	4711.18	5229.45	4295.24	50582.7	221.533	176.513	232.172	50582.7	1167.01	1270.71	1655.07	50582.7	761.84	1013.85	1237.77	50582.7	297.851	352.682	299.729	49275.9
	49850.8	4896.7	4789.13	4746.69	49850.8	4393.04	4772.08	4554.16	49850.8	4896.7	4789.13	4746.69	51874.8	3233.84	3185.83	3303.63	51257.2	4103.71	4121.3	3998.53	51257.2	3434.11	3325.06	3293.54	51257.2	3808.42	3579.04	3486.71	51257.2	4720.79	5252.28	4323.82	51257.2	218.921	176.246	235.969	51257.2	1179.15	1297.09	1660.52	51257.2	769.354	1020.75	1250.31	51257.2	290.107	353.541	299.799	49932.9
	50506.8	4849.54	4781.67	4712.22	50506.8	4366.56	4775.68	4563.11	50506.8	4849.54	4781.67	4712.22	52557.3	3213.75	3190.5	3304.52	51931.6	4094.27	4154.96	4084.28	51931.6	3443.65	3309.16	3288.68	51931.6	3810.47	3515.95	3496.54	51931.6	4695.88	5174.78	4461.99	51931.6	224.456	177.571	237.71	51931.6	1190.69	1294.57	1697.79	51931.6	762.404	1048.82	1255.23	51931.6	308.458	356.718	307.249	50589.9
	51162.7	4839.96	4776.36	4737.9	51162.7	4428.29	4827.32	4621.29	51162.7	4839.96	4776.36	4737.9	53239.9	3226.07	3216.27	3311.63	52606	3971.37	4120.25	4082.28	52606	3430.44	3344.16	3242.5	52606	3777.56	3603.9	3522.78	52606	4654.02	5081.56	4563.8	52606	220.457	175.45	235.337	52606	1188.36	1305.42	1689.6	52606	764.491	1047.31	1267.46	52606	313.359	352.831	307.451	51246.9
	51818.6	4861.8	4796.1	4763.09	51818.6	4405.57	4795.52	4605.28	51818.6	4861.8	4796.1	4763.09	53922.4	3201.07	3214.66	3284.08	53280.4	4037.07	4090.76	3963.19	53280.4	3439.03	3316.01	3242.16	53280.4	3792.15	3522.68	3521.12	53280.4	4656.06	5016.16	4674.9	53280.4	224.396	177.939	237.634	53280.4	1187.24	1340.76	1718.34	53280.4	771.044	1056.82	1297.37	53280.4	278.727	355.948	306.955	51903.9
	52474.5	4856.23	4797.71	4729.74	52474.5	4452.29	4747.39	4580.97	52474.5	4856.23	4797.71	4729.74	54605	3224.49	3219.98	3309.22	53954.9	4069.71	4092.65	4008.8	53954.9	3418.3	3272.41	3230.67	53954.9	3596.31	3640.22	3605.85	53954.9	4653.9	4968.88	4741.67	53954.9	227.138	177.335	241.095	53954.9	1203.23	1318.87	1696.32	53954.9	772.354	1086.33	1296.36	53954.9	281.591	363.289	308.71	52560.9
	53131.2	4812.19	4753.15	4720.6	53131.2	4418.21	4776.89	4614.09	53131.2	4812.19	4753.15	4720.6	55287.5	3253.02	3232.14	3309.86	54629.3	4086.71	4161.1	4020.77	54629.3	3413.96	3329.08	3221.17	54629.3	3709.49	3553.58	3555.14	54629.3	4617.56	4947.49	5079.82	54629.3	226.688	181.169	242.993	54629.3	1202.74	1323.24	1729.77	54629.3	761.692	1115.65	1318.15	54629.3	291.522	359.538	316.338	53217.9
	53787.1	4819.71	4761.94	4726.21	53787.1	4402.57	4730.2	4591.65	53787.1	4819.71	4761.94	4726.21	55970.1	3218.31	3277.98	3308.53	55303.7	4029.56	3977.88	3858.28	55303.7	3400.1	3266.23	3193.72	55303.7	3794.26	3610.93	3621.37	55303.7	4579.35	4967.28	5066.54	55303.7	227.873	179.566	245.902	55303.7	1199	1316.35	1710.11	55303.7	771.527	1123.53	1324.31	55303.7	292.424	351.897	311.053	53874.9
	54443	4799.07	4748.02	4733.14	54443	4395.61	4762.25	4558.73	54443	4799.07	4748.02	4733.14	56652.6	3196.53	3228.38	3307.16	55978.2	3998.3	4130.84	3920.26	55978.2	3355.96	3229.76	3197.5	55978.2	3772.63	3540.23	3653.56	55978.2	4606.64	4999.58	5018.19	55978.2	230.571	179.591	248.875	55978.2	1197.21	1328.53	1733.56	55978.2	778.267	1141.76	1341.62	55978.2	287.436	358.885	315.93	54531.9
	55098.9	4770.87	4740.2	4720.27	55098.9	4387.21	4743.99	4576.13	55098.9	4770.87	4740.2	4720.27	57335.2	3222.91	3217.09	3302.01	56652.6	4052.33	4141.8	3895.13	56652.6	3353.39	3210.57	3203.84	56652.6	3760.34	3565.58	3616.13	56652.6	4580.08	4861.2	5016.64	56652.6	232.218	183.606	247.383	56652.6	1212	1328.07	1728.7	56652.6	774.317	1122.74	1346.24	56652.6	283.851	346.451	308.6	55188.9
	55754.8	4772.61	4740.58	4712.46	55754.8	4410.34	4750.55	4573.35	55754.8	4772.61	4740.58	4712.46	58017.7	3213.17	3214.76	3347.94	57327	3967.89	4105.13	3932.79	57327	3329.86	3221.38	3199.04	57327	3438.39	3514.48	3710.4	57327	4530.79	4826.37	4965.78	57327	233.957	184.582	249.964	57327	1202.34	1345.03	1724.5	57327	769.787	1120.92	1369.51	57327	301.176	346.016	313.221	55845.9
	56410.7	4761.85	4733.49	4712.29	56410.7	4428.51	4735.49	4558.6	56410.7	4761.85	4733.49	4712.29	58700.3	3244.78	3247.89	3341.18	58001.4	3995.82	4126.85	3865.46	58001.4	3291.16	3223.87	3142.96	58001.4	3661.24	3411.98	3725.35	58001.4	4535.31	4795.56	4923.8	58001.4	234.275	180.939	250.658	58001.4	1203.07	1339.21	1747.87	58001.4	754.455	1161.13	1375.34	58001.4	287.181	340.498	296.614	56502.9
	57066.6	4726.41	4694.34	4687.27	57066.6	4391.13	4734.55	4571.67	57066.6	4726.41	4694.34	4687.27	59382.8	3209.11	3268.4	3311.27	58675.9	3807.81	4058.34	3875.85	58675.9	3307.35	3176.6	3141.77	58675.9	3613.08	3406.25	3791.3	58675.9	4487.89	4788.8	4938.31	58675.9	233.978	184.063	251.121	58675.9	1201.69	1334.81	1720.57	58675.9	761.419	1128.34	1388.7	58675.9	290.28	339.973	296.359	57159.9
	57722.5	4753.65	4728.39	4712.02	57722.5	4423.87	4747.91	4568.07	57722.5	4753.65	4728.39	4712.02	60065.4	3246.96	3292.14	3351.55	59350.3	3981.78	4021.73	3813.76	59350.3	3304.04	3161.27	3136.77	59350.3	3762.91	3533.84	3845.52	59350.3	4509.39	4760.27	4979.35	59350.3	236.085	183.69	250.761	59350.3	1213.4	1347.39	1735.24	59350.3	774.806	1180.33	1399.06	59350.3	299.813	336.687	323.618	57816.9
	58378.4	4749.66	4726.94	4723.61	58378.4	4384.41	4736.91	4540.12	58378.4	4749.66	4726.94	4723.61	60747.9	3239.36	3267.29	3344.92	60024.7	3989.81	4042.93	3829.28	60024.7	3270.26	3196.7	3116.48	60024.7	3507.26	3560.5	3876.64	60024.7	4440.97	4716.98	4925.88	60024.7	239.462	186.812	252.36	60024.7	1206.16	1330.3	1709.75	60024.7	771.472	1142.09	1417.15	60024.7	285.621	340.088	294.161	58473.9
	59034.3	4729.36	4722.32	4701.41	59034.3	4381.79	4707.7	4525.92	59034.3	4729.36	4722.32	4701.41	61430.5	3234.73	3332.73	3376.62	60699.1	3966.26	4047.49	3797.62	60699.1	3260.71	3147.92	3104.14	60699.1	3523.74	3271.76	3921.77	60699.1	4413.62	4676.11	4848.23	60699.1	234.8	183.987	253.133	60699.1	1205.43	1336.52	1753.63	60699.1	768.04	1165.59	1411.71	60699.1	288.332	343.22	300.908	59130.9
	59690.2	4681.97	4664.34	4678.52	59690.2	4375.5	4692.28	4540.45	59690.2	4681.97	4664.34	4678.52	62113	3218.25	3286.78	3354.65	61373.6	3900.35	4018.45	3832.49	61373.6	3226.85	3167.47	3053.42	61373.6	3642.8	3365.62	3907	61373.6	4418.86	4686.99	4670.88	61373.6	241.082	185.302	254.593	61373.6	1213.06	1356.09	1717.26	61373.6	792.407	1194.86	1442.79	61373.6	291.233	346.808	299.959	59787.9
	60346.1	4677.63	4678.12	4679	60346.1	4366.04	4682.08	4513.43	60346.1	4677.63	4678.12	4679	62795.6	3219.63	3282.68	3334.98	62048	3727.66	4113.69	3777.33	62048	3231.6	3171.73	3072.12	62048	3581.58	3356.76	3916.17	62048	4403.43	4598.43	4581.9	62048	240.608	183.541	252.363	62048	1210.06	1338.76	1711.38	62048	770.441	1197.78	1459.65	62048	295.707	344.262	298.748	60444.9
	61002	4687.49	4692.41	4707.12	61002	4382.54	4665.09	4472.57	61002	4687.49	4692.41	4707.12	63478.1	3211.22	3296	3327.64	62722.4	3993.97	4004.93	3808.36	62722.4	3258.82	3174.5	3073.22	62722.4	3330.99	3425.38	3965.43	62722.4	4416.94	4620.11	4586.16	62722.4	240.238	187.752	255.503	62722.4	1211.67	1351.92	1730.26	62722.4	793.982	1181.58	1487.88	62722.4	297.089	336.721	299.884	61101.9
	61658	4681.3	4677.67	4692.11	61658	4399.13	4697.39	4511.04	61658	4681.3	4677.67	4692.11	64160.7	3195.77	3291.97	3299.44	63396.8	3887.62	4008.28	3744.19	63396.8	3200	3138.55	3043.12	63396.8	3517.8	3475.29	3998.98	63396.8	4386.76	4609.96	4549.55	63396.8	243.581	186.546	257.283	63396.8	1224.44	1370.37	1731.24	63396.8	784.994	1186.15	1511.63	63396.8	292.596	347.859	298.122	61759
	62313.9	4672.4	4666.01	4680.87	62313.9	4403.4	4711.11	4514.51	62313.9	4672.4	4666.01	4680.87	64843.3	3223.93	3314.45	3337.84	64071.3	3937.78	4004.13	3712.8	64071.3	3187	3121.78	3058.4	64071.3	3556.94	3299.86	4053.56	64071.3	4415.89	4621.39	4549.98	64071.3	241.149	187.447	254.264	64071.3	1221.8	1354.73	1730.48	64071.3	770.063	1209.98	1534.37	64071.3	299.065	339.784	301.841	62416
	62969.8	4657.85	4651.75	4686.34	62969.8	4391.93	4699.64	4485.04	62969.8	4657.85	4651.75	4686.34	65525.8	3212.91	3294.22	3365.13	64745.8	3719.79	3788.78	3718.12	64745.8	3200.46	3092.8	3000.73	64745.8	3299.17	3321.05	4020.11	64745.8	4341.43	4606.11	4559.52	64745.8	242.283	187.991	257.677	64745.8	1220.41	1367.55	1748.07	64745.8	767.542	1145.3	1558.47	64745.8	298.444	386.391	329.643	63073
	63625.7	4664.47	4674.43	4716.03	63625.7	4406.35	4679.99	4464.13	63625.7	4664.47	4674.43	4716.03	66208.4	3219.4	3296.76	3353.69	65420.2	3828.71	3648.43	3718.03	65420.2	3180.78	3071.72	3028.97	65420.2	3542.2	3227.93	4109.36	65420.2	4333.87	4568	4531.42	65420.2	243.385	190.578	259.457	65420.2	1228.32	1366.02	1752.71	65420.2	770.999	1177.39	1593.66	65420.2	295.448	390.893	331.471	63730
	64281.6	4665.08	4681.52	4714.84	64281.6	4372.06	4675.61	4470.68	64281.6	4665.08	4681.52	4714.84	66890.9	3220.38	3297.2	3336.12	66094.6	3742.33	3647.21	3845.75	66094.6	3193.31	3062.41	3034.76	66094.6	3480.72	3381.89	4022.58	66094.6	4285.95	4625.55	4487.41	66094.6	243.059	188.65	258.66	66094.6	1222.15	1362.66	1743.27	66094.6	773.022	1222.35	1620.52	66094.6	298.019	332.44	311.586	64387
	64937.5	4656.5	4680.17	4709.15	64937.5	4402.91	4715.29	4502.38	64937.5	4656.5	4680.17	4709.15	67573.5	3206.26	3302.46	3377.56	66769.1	3923	3842.77	3673.63	66769.1	3141.62	3118.95	3009.96	66769.1	3512.99	3218.21	4033.22	66769.1	4297.51	4534.02	4452.09	66769.1	245.698	188.667	257.924	66769.1	1210.31	1373.74	1801.95	66769.1	775.415	1213.2	1671.66	66769.1	307.255	350.877	311.608	65044.7
	65593.4	4623.03	4656.23	4667.54	65593.4	4398.91	4674.26	4457.76	65593.4	4623.03	4656.23	4667.54	68256	3183.41	3308.7	3354.24	67443.5	3888.7	3850.91	3521.52	67443.5	3147.12	3098.06	3037.01	67443.5	3383.11	3477.08	4107.18	67443.5	4330.48	4494.36	4445.31	67443.5	248.436	191.642	259.901	67443.5	1232.39	1389.95	1808.07	67443.5	792.327	1234.74	1745.01	67443.5	302.701	350.149	318.959	65701.7
													68938.6	3182.3	3284.53	3344.27	68117.9	3860.62	3562.96	3754.77	68117.9	3175.02	3076.58	3031.64	68117.9	3510.26	3339.14	4072.27	68117.9	4274.57	4426.67	4359.77	68117.9	245.956	192.356	260.501	68117.9	1243.18	1381.34	1760.2	68117.9	772.737	1221.22	1767.09	68117.9	309.83	355.823	313.547	66358.7
													69621.8	3144.89	3288.46	3350.33	68792.3	3699.19	3878.34	3783.85	68792.3	3142.2	3120.96	2988.51	68792.3	3482.26	3500.6	4099.49	68792.3	4299.62	4448.79	4342.51	68792.3	248.035	192.689	262.851	68792.3	1242.85	1363.22	1807.58	68792.3	800.39	1244.02	1814.36	68792.3	301.687	349.681	331.749	67015.7
													70304.4	3158.05	3312.91	3339.25	69466.8	3659.17	3897.78	3641.21	69466.8	3191.75	3093.89	3055.27	69466.8	3378.71	3625.38	4136.01	69466.8	4245.37	4409.49	4379.59	69466.8	250.749	194.578	266.269	69466.8	1244.21	1396.76	1800.19	69466.8	795.584	1241.22	1855.22	69466.8	323.987	360.857	317.163	67672.7
													70986.9	3153.07	3298.61	3327.19	70141.2	3700.59	3973.23	3723.66	70141.2	3111.81	3112.07	3037.6	70141.2	3186.82	3629.6	4193.31	70141.2	4266.87	4536.65	4411.35	70141.2	252.426	192.556	265.553	70141.2	1244	1412.52	1802.19	70141.2	778.131	1285.82	1950.02	70141.2	302.604	408.109	350.308	68329.7
													71669.5	3141.4	3276.39	3319.26	70815.7	3907.79	3964	3604.39	70815.7	3057.46	3062.21	3052.25	70815.7	3415.67	3537.38	4197.18	70815.7	4254.04	4419.53	4373.62	70815.7	250.897	194.016	263.834	70815.7	1233.04	1421.81	1842.19	70815.7	777.784	1282.28	1943.7	70815.7	309.093	355.79	319.737	68986.7
													72352	3181.09	3313.9	3326.99	71490.1	3712.84	3807.4	3762.64	71490.1	3151.93	3068.68	2990.62	71490.1	3362.55	4012.65	4273.64	71490.1	4231.04	4390.32	4316.79	71490.1	256.105	194.322	267.642	71490.1	1230.76	1411.19	1795.34	71490.1	787.592	1294.23	2078.44	71490.1	329.052	352.714	316.963	69643.7
													73034.6	3153.62	3321.09	3340.99	72165.3	3900.37	3460.63	3744.09	72165.3	3096.8	3065.77	3020.8	72165.3	3340.12	3907.34	4323.36	72165.3	4223.27	4343.81	4335.33	72165.3	252.591	192.107	267.131	72165.3	1267.69	1323.43	1773.69	72165.3	730.129	1328.18	2103.62	72165.3	311.67	363.406	320.93	70300.7
													73717.2	3169.33	3338.57	3355.01	72839.7	3616.92	3702.82	3242.87	72839.7	3094.73	3099.23	3044.98	72839.7	3368.91	4117.02	4402.55	72839.7	4194.86	4365.87	4361.99	72839.7	252.342	196.867	268.299	72839.7	1265.9	1335.89	1796.56	72839.7	798.401	1286.2	2141.95	72839.7	336.33	356.102	324.418	70957.7
													74399.7	3192.66	3358.65	3385.13	73514.1	3848.88	3665.95	3958.98	73514.1	3164.26	3093.17	3063.71	73514.1	3819.11	4365.79	4561.73	73514.1	4129.18	4345.53	4230.29	73514.1	259.248	196.368	267.647	73514.1	1267.76	1441.29	1877.52	73514.1	801.957	1288.7	2272.9	73514.1	322.36	365.181	331.358	71614.7
													75082.3	3184.75	3368.06	3377.83	74188.6	3647.17	3482.68	3960.66	74188.6	3103.67	3045.25	3045.24	74188.6	3563.04	4312.04	4686.11	74188.6	4020.19	4340.58	4172.24	74188.6	260.706	197.203	270.425	74188.6	1282.12	1376.56	1879.89	74188.6	805.745	1335.52	2280.91	74188.6	324.914	362.264	327.324	72271.7
													75764.8	3198.78	3395.88	3402.54	74863	3755.4	4001.66	3408.51	74863	3114.33	3060.67	3015.67	74863	3718.7	4328.87	4887.72	74863	3975.8	4315.85	4129.94	74863	261.176	199.763	271.706	74863	1268.72	1459.23	1797.37	74863	805.754	1359.06	2291.2	74863	359.365	365.064	333.098	72928.7
													76447.4	3142.18	3366.15	3372.96	75537.4	3717.81	3449.87	3317.87	75537.4	3093.16	3029.91	3036.08	75537.4	3663.7	4377.85	4899.74	75537.4	3959.26	4303.67	4048.37	75537.4	259.775	197.909	274.116	75537.4	1289.6	1439.29	1853.57	75537.4	765.899	1457.06	2338.02	75537.4	353.518	389.918	329.852	73585.7
													77129.9	3186.36	3388.12	3402.94	76211.9	3813.18	3430.04	3401.79	76211.9	3074.02	3063.95	3010.01	76211.9	3600.74	4464.84	5097.27	76211.9	3940.12	4276.96	4002.73	76211.9	262.019	196.842	275.917	76211.9	1283.23	1468.23	1894.95	76211.9	816.014	1470.06	2397.34	76211.9	325.313	375.461	333.79	74242.7
													77812.5	3200.69	3393.3	3391.24	76886.3	3810.86	3780.79	3544.66	76886.3	3076.12	3070.11	3048.79	76886.3	4083.38	4398.98	5257.81	76886.3	3863.23	4253.24	3892.81	76886.3	259.671	198.224	267.449	76886.3	1301.18	1445.47	1895.6	76886.3	751.985	1436.87	2455.73	76886.3	366.125	394.422	329.883
													78495	3191.71	3401.07	3382.52	77560.7	3834.36	3813.13	3858.51	77560.7	3086.83	2993.52	3080.09	77560.7	4201.86	4654.09	5600.89	77560.7	3872.02	4227.68	3918.48	77560.7	253.329	197.737	268.187	77560.7	1274.89	1386.69	1920.92	77560.7	810.827	1557.27	2526.68	77560.7	356.071	373.195	338.079
													79177.6	3215.84	3406.18	3417.65	78235.3	3804.23	3672.56	3793.85	78235.3	3043.83	3038.4	3116.58	78235.3	4169.35	4650.5	5967.95	78235.3	3813.68	4185.87	3823.41	78235.3	253.126	196.339	261.962	78235.3	1299.11	1352.11	1778.3	78235.3	774.506	1535.01	2557.12	78235.3	353.069	397.927	343.933
													79860.1	3177	3380.7	3396.91	78909.7	3780.18	3510.57	3590.93	78909.7	3042.73	3043.77	3104.46	78909.7	4285.22	4501.76	6468.99	78909.7	3763.72	4023.59	3808.92	78909.7	252.117	199.87	268.43	78909.7	1259.2	1462.65	1909.1	78909.7	815.231	1547.05	2596.67	78909.7	368.75	401.534	344.133
													80542.7	3204.84	3394.94	3403.01	79584.1	3728.37	3702.01	3416.93	79584.1	3007.04	2984.32	3124.36	79584.1	4499.79	4232.28	7261.64	79584.1	3686.72	3942.95	3795.88	79584.1	249.368	198.981	265.554	79584.1	1259.05	1470.42	1766.06	79584.1	769.626	1641.04	2655.99	79584.1	356.361	393.583	359.808
													81225.2	3175.35	3383.09	3377.35	80258.6	3684.76	3782.87	3642.99	80258.6	2972.8	2990.23	3183.07	80258.6	4541.95	4639.71	8932.73	80258.6	3670.29	3905.97	3691.44	80258.6	251.37	199.181	263.969	80258.6	1297.52	1482.32	1742.72	80258.6	818.914	1668.39	2689.03	80258.6	395.538	404.803	345.893
													81907.8	3209.5	3386.67	3393.58
													82590.3	3185.93	3367.14	3360.56
													83272.9	3164.66	3348.84	3367.84
													83955.4	3206.33	3374.96	3356.67
													84638	3230	3375.01	3341.83
													85320.5	3249.91	3399.38	3381.16
													86003.1	3304.08	3398.39	3381.26
													86685.6	3328.75	3374.17	3377.04
													87368.2	3396.32	3414.85	3393.48
													88050.7	3439.58	3424.74	3423.39
													88733.3	3411.46	3385.94	3374.77
													89415.9	3539.71	3423.84	3391.42
													90098.4	3555.52	3420.57	3387.48
													90781	3732.08	3468.1	3438.28
													91463.5	3727.27	3444.3	3414.91
													92146.1	3917.37	3499.03	3471.66
													92828.6	3876.92	3506.31	3442.77
													93511.2	3984.66	3545.1	3492.33
													94193.7	3982.15	3553.48	3488.61
													94876.3	4103.04	3637.25	3518.92
													95558.8	4141.51	3680.15	3580.41
													96241.4	4192.82	3787.09	3627.63
													96924	4230.65	3849.22	3689.5
													97606.5	4219.74	3892.58	3736.4
													98289.1	4190.88	3943.29	3793.8
													98971.6	4280.2	4059.5	3841.76
													99654.2	4254.69	4076.46	3921.89
													100337	4253.57	4178.04	3991.05
													101019	4350.66	4267.19	4099.33
													101702	4444.97	4322	4188.53
													102384	4412.96	4288.58	4165.9
													103067	4399.76	4377.33	4224.28
													103750	4394.53	4361	4264.34
													104432	4403.77	4389.82	4274.54
													105115	4421.08	4411.13	4309.56
													105797	4462.86	4425.4	4343.13
													106480	4513.32	4473.92	4386.92
													107162	4536.46	4480.44	4379.83
													107845	4627.73	4505.26	4412.69
													108527	4732.83	4487.66	4403.26
													109210	4759.12	4579.51	4427.61
													109892	4799.7	4592.39	4455.88
													110576	4842.79	4599.72	4477.69
													111258	5006	4658.32	4504.46
													111941	5053.76	4633.28	4486.95
													112623	5182.78	4678.25	4493.49
													113306	5255.6	4704.11	4526.93
													113989	5430.48	4724.22	4564.48
													114671	5764.86	4824.72	4628.05
													115354	6068.63	4803.82	4655.29
													116036	6276.42	4849.36	4715.45
													116719	7024.89	4945.15	4678.3
													117401	7667.13	4974	4746.12
													118084	8862.82	5057.8	4740.55
													118766	10730.7	5177.83	4840.72
													119449	18145.3	5288.91	4898.11
													120132	52827.2	5422.79	4919.24
													120814	-251144	5609.63	5159.32
													121497	-27932.3	5805.79	5219.65
													122179	-20918	5941.51	5248.41
													122862	-17682.5	6301.32	5521.45
													123544	-15372.2	6653.68	5754.12
													124227	-13657.7	7291.23	5803.32
													124910	-10684	8295.61	6169.53
													125592	-8294.12	10090.9	6746.07
													126275	-9266.41	13969.1	7447.43
													126957	12293	26645.8	8537.67
													127640	4016.91	110000	11547
													128322	4106.78	-44825.2	17462.4
													129005	5422.88	-18366.7	36576.6
													129688	5900	-12085.6	520771
													130370	5994.77	-8968.61	-55309.7
													131053	4722.89	-6464.84	-24604.7
													131735	3529.41	-5332.03	-17689.2
													132418	3479.45	-3871.5	-17336.3
													133100	2729.8	-3008.4	-15528.9
													133783	2662.34	-3372.09	-34303.8
													134465	5238.1	-5281.38	-18106
													135148	6941.17	-4351.46	-5178.57
													135830	-8928.57	-6341.46	4805.19
[truncated: 185 more columns]

## Sheet: Fig4A-final
Sau vector control	Sau Apo	Spy vector control	Spy Apo	SpyG1	SpyG2	SpyG3	SpyG4	SaG1	SaG2	SaG3	SaG4	Spy1	Spy2	Spy3	Spy4	dSa1	dSa2	dSa3	dSa4
2067.64	1799.65	4635.66	2067.53	4360.27	3410.24	3136.15	4446.98	3108.24	3463.24	2251.78	3934.36	211.238	1156.12	714.329	290.28	311.798	782.01	489.354	488.508
1843.85	2166.21	3965.75	1873.55	5102.96	3198.26	3011.7	5835.73	2927.63	2898.62	2185.89	3499.55	167.228	1269.99	853.595	343.22	337.067	733.371	227.606	606.184
2051.99	1926.84	4351.16	1868.26	4526.92	3025.95	2743.33	3715.18	2943.02	2867.53	2043.97	3761.76	230.51	1656.82	921.647	296.359	299.926	680.303	223.672	984.686
Normalized to respective vectors				SpyG1	SpyG2	SpyG3	SpyG4	SaG1	SaG2	SaG3	SaG4	dSpy1	dSpy2	dSpy3	dSpy4	dSa1	dSa2	dSa3	dSa4
				0.940594	0.735655	0.676529	0.959298	1.50328	1.67497	1.08906	1.90283	0.102169	0.559178	0.345498	0.140399	0.173255	0.434536	0.271917	0.271447
				1.28676	0.806468	0.759427	1.47153	1.58778	1.57205	1.1855	1.89796	0.0892568	0.677852	0.455602	0.183192	0.155602	0.338551	0.105071	0.279837
				1.04039	0.695435	0.630482	0.853836	1.43422	1.39744	0.996088	1.83322	0.123382	0.886827	0.493318	0.158628	0.155657	0.353067	0.116082	0.511037
Reorganized				SpyG1	dSpy1	SaG1	dSa1	SpyG2	dSpy2	SaG2	dSa2	SpyG3	dSpy3	SaG3	dSa3	SpyG4	dSpy4	SaG4	dSa4
				0.940594	0.102169	1.50328	0.173255	0.735655	0.559178	1.67497	0.434536	0.676529	0.345498	1.08906	0.271917	0.959298	0.140399	1.90283	0.271447
				1.28676	0.0892568	1.58778	0.155602	0.806468	0.677852	1.57205	0.338551	0.759427	0.455602	1.1855	0.105071	1.47153	0.183192	1.89796	0.279837
				1.04039	0.123382	1.43422	0.155657	0.695435	0.886827	1.39744	0.353067	0.630482	0.493318	0.996088	0.116082	0.853836	0.158628	1.83322	0.511037
Abbreviation key
SpyG1	Spy Guide for Spy PAM
SpyG2	Spy Guide for No PAM
SpyG3	Spy Guide for Sa PAM
SpyG4	Spy Guide for Dual PAM
Spy1	Spy RNP for Spy PAM
Spy2	Spy RNP for No PAM
Spy3	Spy RNP for Sa PAM
Spy4	Spy RNP for Dual PAM
SaG1	Sau Guide for Spy PAM
SaG2	Sau Guide for No PAM
SaG3	Sau Guide for Sa PAM
SaG4	Sau Guide for Dual PAM
dSa1	Sau RNP for Spy PAM
dSa2	Sau RNP for No PAM
dSa3	Sau RNP for Sa PAM
dSa4	Sau RNP for Dual PAM
Sidak's multiple comparisons test	Mean Diff.	95.00% CI of diff.	Significant?	Summary	Adjusted P Value
SpyG1 vs. dSpy1	0.9843	0.6873 to 1.281	Yes	****	<0.0001
SaG1 vs. dSa1	1.347	1.05 to 1.644	Yes	****	<0.0001
SpyG2 vs. dSpy2	0.0379	-0.2591 to 0.3349	No	ns	>0.9999
SaG2 vs. dSa2	1.173	0.8758 to 1.47	Yes	****	<0.0001
SpyG3 vs. dSpy3	0.2573	-0.03967 to 0.5543	No	ns	0.1252
SaG3 vs. dSa3	0.9259	0.6289 to 1.223	Yes	****	<0.0001
SpyG4 vs. dSpy4	0.9341	0.6371 to 1.231	Yes	****	<0.0001
SaG4 vs. dSa4	1.524	1.227 to 1.821	Yes	****	<0.0001

## Sheet: Fig4B-final
Vector Control	Sau Apo	Guide 20	RNP 20	Guide 21	RNP 21	Guide 22	RNP 22	Guide 23	RNP 23
2067.64	1799.65	1675.36	1135.99	1468.26	206.82	3123.75	291.898	3197.55	315.523
1843.85	2166.21	1568.86	1331.72	1300.63	301.591	3059.22	328.266	3249.94	319.567
2051.99	1926.84	1646.88	1135.07	1250.47	341.837	3185.7	317.121	2988.98	261.052
Normalized to respective vectors		Guide 20	RNP 20	Guide 21	RNP 21	Guide 22	RNP 22	Guide 23	RNP 23
		0.810279	0.631227	0.710114	0.114923	1.51078	0.162198	1.54647	0.175325
		0.850861	0.614772	0.70539	0.139226	1.65915	0.15154	1.76259	0.147524
		0.802574	0.589086	0.609392	0.177408	1.55249	0.164581	1.45662	0.135482
Normalized to guide		20	21	22	23
		0.779025	0.161837	0.10736	0.113371
		0.722529	0.197374	0.0913358	0.0836973
		0.733996	0.291123	0.106011	0.0930109
Tukey's multiple comparisons test	Mean Diff.	95.00% CI of diff.	Significant?	Summary	Adjusted P Value
20 vs. 21	0.4946	0.4089 to 0.5802	Yes	****	<0.0001
20 vs. 22	0.6018	0.5161 to 0.6875	Yes	****	<0.0001
20 vs. 23	0.6064	0.5207 to 0.6921	Yes	****	<0.0001
21 vs. 22	0.1072	0.02158 to 0.1929	Yes	*	0.0165
21 vs. 23	0.1118	0.02616 to 0.1975	Yes	*	0.0131
22 vs. 23	0.004578	-0.08109 to 0.09024	No	ns	0.9981

## Sheet: Fig4C-final
Vector Control	Sau Apo	Guide RBS	RNP RBS	Guide GFP1	RNP GFP1	Guide GFP2	RNP GFP2	Guide GFP3	RNP GFP3	Guide GFP4	RNP GFP4	Guide GFP5	RNP GFP5	Guide GFP6	RNP GFP6	Guide GFP7	RNP GFP7	Guide GFP8	RNP GFP8	Guide GFP9	RNP GFP9	Guide GFP10	RNP GFP10	Guide GFP11	RNP GFP11	Guide GFP12	RNP GFP12
2067.64	1799.65	858.135	423.189	457.699	388.47	3108.24	311.798	2013.11	1090.83	972.692	462.489	2001.9	1034.44	3463.24	782.01	1405.07	1888.45	1525.87	1280.14	567.399	609.983	2316.56	1817.46	1375.73	1228.65	975.916	476.832
1843.85	2166.21	874.176	435.946	530.847	418.087	2927.63	337.067	2070.71	1284.24	771.867	481.273	2011.21	1260.39	2898.62	733.371	1425.85	1853.23	1676.53	1365.45	680.573	515.224	2342.68	2058.9	1582.49	1185.7	1035.42	452.621
2051.99	1926.84	950.766	401.981	649.028	413.221	2943.02	299.926	2071.05	1006.02	865.715	433.548	1873.67	899.534	2867.53	680.303	1281.89	1607.54	1445.23	1290.34	952.381	493.331	2182.79	1876.47	1368.12	1019.07	1033.89	465.173
Normalized to vector		Guide RBS	RNP RBS	Guide GFP1	RNP GFP1	Guide GFP2	RNP GFP2	Guide GFP3	RNP GFP3	Guide GFP4	RNP GFP4	Guide GFP5	RNP GFP5	Guide GFP6	RNP GFP6	Guide GFP7	RNP GFP7	Guide GFP8	RNP GFP8	Guide GFP9	RNP GFP9	Guide GFP10	RNP GFP10	Guide GFP11	RNP GFP11	Guide GFP12	RNP GFP12
		0.415032	0.235151	0.221363	0.215859	1.50328	0.173255	0.97363	0.606135	0.470437	0.256989	0.968205	0.574804	1.67497	0.434536	0.679553	1.04934	0.73798	0.71133	0.274419	0.338946	1.12039	1.0099	0.665362	0.68272	0.471996	0.264959
		0.474104	0.201249	0.287902	0.193004	1.58778	0.155602	1.12304	0.592852	0.418617	0.222173	1.09077	0.581843	1.57205	0.338551	0.7733	0.855519	0.909256	0.630342	0.369105	0.237846	1.27054	0.950465	0.858255	0.547364	0.561554	0.208947
		0.463338	0.208622	0.316291	0.214455	1.43422	0.155657	1.00929	0.522109	0.42189	0.225005	0.913096	0.466844	1.39744	0.353067	0.624704	0.834287	0.704304	0.669665	0.464125	0.256031	1.06374	0.973857	0.666728	0.528881	0.503847	0.241417
Normalized to guide		RBS	GFP1	GFP2	GFP3	GFP4	GFP5	GFP6	GFP7	GFP8	GFP9	GFP10	GFP11	GFP12
		0.566586	0.975135	0.115251	0.622552	0.546277	0.59368	0.259428	1.54417	0.963888	1.23514	0.901382	1.02609	0.561359
		0.424483	0.670382	0.0979997	0.527902	0.530731	0.533425	0.215357	1.10632	0.69325	0.644387	0.748079	0.637764	0.372086
		0.450259	0.67803	0.10853	0.517304	0.533326	0.511276	0.252653	1.33549	0.950818	0.551643	0.915501	0.793248	0.479148
