# Supplementary material for: RNA-dependent RNA targeting by CRISPR-Cas9
Source: eLife journal article supplement (doi:10.7554/elife.32724), 2018-01-05
Supplement: supp [file elife-32724-supp-v1.zip › elife_poa_e32724_Supplementary_File_1.xlsx]

## Sheet: Sheet1
In vitro targets	Sequence from 5' -> 3'
ssRNA	GGGCAGCAUUCAACCAUAUGGCAUCCGCUUACAGCCAAGCUGUGACC
dsRNA - TS	GGGCAGCAUUCAACCAUAUGGCAUCCGCUUACAGCCAAGCUGUGACC
dsRNA - NTS	GGUCACAGCUUGGCUGUAAGCGGAUGCCAUAUGGUUGAAUGCUGCCC
ssDNA	GGGCAGCATTCAACCATATGGCATCCGCTTACAGCCAAGCTGTGACC
dsDNA - TS	GGGCAGCATTCAACCATATGGCATCCGCTTACAGCCAAGCTGTGACC
dsDNA - NTS	GGTCACAGCTTGGCTGTAAGCGGATGCCATATGGTTGAATGCTGCCC
PAMmer	CCATATGGTTGAATGCTGCCC
unrelated DNA oligo control PAMmer	GAAGCCCTGAAAGACGCGCAG
NTS ssRNA	GGUCACAGCUUGGCUGUAAGCGGAUGCCAUAUGGUUGAAUGCUGCCC
ssRNA mutant anti-PAM	GGGCAGCCAAGUCCCAUAUGGCAUCCGCUUACAGCCAAGCUGUGACC
dsRNA mutant anti-PAM - TS	GGGCAGCCAAGUCCCAUAUGGCAUCCGCUUACAGCCAAGCUGUGACC
dsRNA mutant anti-PAM - NTS	GGUCACAGCUUGGCUGUAAGCGGAUGCCAUAUGGUUGAAUGCUGCCC
2nt 3' end of guide NTS	GGUCACAGCUUGGCUGUAAGCGGAUGCCAUAUAAUUGAAUGCUGCCC
6nt 3' end of guide NTS	GGUCACAGCUUGGCUGUAAGCGGAUGCCUAUAAAUUGAAUGCUGCCC
12nt 3' end of guide NTS	GGUCACAGCUUGGCUGUAAGCGUUACAGUAUAAAUUGAAUGCUGCCC
23nt Bubble/mutant anti-PAM NTS	GGUCACAGCUUAAUGAAUUCAAUUACAGUAUAAAUUGAAUGCUGCCC
2nt 3' end of guide NTS	GGUCACAGCUUAACUGUAAGCGGAUGCCAUAUGGUUGAAUGCUGCCC
6nt 3' end of guide NTS	GGUCACAGCUUAAUGAAAAGCGGAUGCCAUAUGGUUGAAUGCUGCCC
12nt 3' end of guide NTS	GGUCACAGCUUAAUGAAUUCAAUAUGCCAUAUGGUUGAAUGCUGCCC
pUC target	GGGCAGCAUUCAACCAUAUGGCAUCCGCUUACAGCCAAGCUGUGACC
ON target	GGGAUUCAACCAUAUGGCAUCCGCUUACAGCCAAGCUG
OFF target	GGGUUUUAUUUUGGAUUUGGAAACGAGAGUUUCUGGUCAUGAA
GFP2 dsDNA - TS	GGGCAGCTGTCCCCCATATGGCATCCGCTTACAGCCAAGCTGTGACC
GFP2 dsDNA - NTS	GGTCACAGCTTGGCTGTAAGCGGATGCCATATGGGGGACAGCTGCCC
GFP4 dsDNA - TS	GGGCAGCCTGTCCCCATATGGCATCCGCTTACAGCCAAGCTGTGACC
GFP4 dsDNA - NTS	GGTCACAGCTTGGCTGTAAGCGGATGCCATATGGGGACAGGCTGCCC
GFP6 dsDNA - TS	GGGCAGCTATTTGCCATATGGCATCCGCTTACAGCCAAGCTGTGACC
GFP6 dsDNA - NTS	GGTCACAGCTTGGCTGTAAGCGGATGCCATATGGCAAATAGCTGCCC
In vitro sgRNAs	Sequence from 5' -> 3'
Spy	GGCUGUAAGCGGAUGCCAUAGUUUUAGAGCUAGAAAUAGCAAGUUAAAAUAAGGCUAGUCCGUUAUCAACUUGAAAAAGUGGCACCGAGUCGGUGCUUUUUU
Sau	GGCUGUAAGCGGAUGCCAUAUGGGUUUUAGUACUCUGGAAACAGAAUCUACUAAAACAAGGCAAAAUGCCGUGUUUAUCUCGUCAACUUGUUGGCGAGAUUUUU
Cje	GGCUGUAAGCGGAUGCCAUAUGUUUUAGUCCCUUUUUAAAUUUCUUUAUGGUAAAAUUAUAAUCUCAUAAGAAAUUUAAAAAGGGACUAAAAUAAAGAGUUUGCGGGACUCUGCGGGGUUACAAUCCCCUAAAACCGCUU
Fno	GGCUGUAAGCGGAUGCCAUAUGUUUCAGUUGCGCCGAAAGGCGCUCUGUAAUCAUUUAAAAGUAUUUUGAACGGACCUCUGUUUGACACGUCUG
Sau 20	GGCTGTAAGCGGATGCCATAGTTTTAGTACTCTGGAAACAGAATCTACTAAAACAAGGCAAAATGCCGTGTTTATCTCGTCAACTTGTTGGCGAGATTTTT
Sau 21	GGCTGTAAGCGGATGCCATATGTTTTAGTACTCTGGAAACAGAATCTACTAAAACAAGGCAAAATGCCGTGTTTATCTCGTCAACTTGTTGGCGAGATTTTT
Sau 22	GGCTGTAAGCGGATGCCATATGGTTTTAGTACTCTGGAAACAGAATCTACTAAAACAAGGCAAAATGCCGTGTTTATCTCGTCAACTTGTTGGCGAGATTTTT
Sau 23	GGCTGTAAGCGGATGCCATATGGGTTTTAGTACTCTGGAAACAGAATCTACTAAAACAAGGCAAAATGCCGTGTTTATCTCGTCAACTTGTTGGCGAGATTTTT
Sau 24	GGCTGTAAGCGGATGCCATATGGTGTTTTAGTACTCTGGAAACAGAATCTACTAAAACAAGGCAAAATGCCGTGTTTATCTCGTCAACTTGTTGGCGAGATTTTT
Sau 25	GGCTGTAAGCGGATGCCATATGGTTGTTTTAGTACTCTGGAAACAGAATCTACTAAAACAAGGCAAAATGCCGTGTTTATCTCGTCAACTTGTTGGCGAGATTTTT
Sau 26	GGCUGUAAGCGGAUGCCAUAUGGUUGGUUUUAGUACUCUGGAAACAGAAUCUACUAAAACAAGGCAAAAUGCCGUGUUUAUCUCGUCAACUUGUUGGCGAGAUUUUU
MS2 plaque sgRNAs	Sequence from 5' -> 3'
Control	UAGACGAGCCCACCGCUUAGACGUUUUAGUACUCUGGAAACAGAAUCUACUAAAACAAGGCAAAAUGCCGUGUUUAUCUCGUCAACUUGUUGGCGAGAUUUUUU
23 guide	AUCCCGGGUCCUCUCUUUAGGGGGUUUUAGUACUCUGGAAACAGAAUCUACUAAAACAAGGCAAAAUGCCGUGUUUAUCUCGUCAACUUGUUGGCGAGAUUUUUU
23 guide scr	GUGCUUGUCCCCCAGGGUCGUAUGUUUUAGUACUCUGGAAACAGAAUCUACUAAAACAAGGCAAAAUGCCGUGUUUAUCUCGUCAACUUGUUGGCGAGAUUUUUU
22 guide	GAGAAUCCCGGGUCCUCUCUUUGUUUUAGUACUCUGGAAACAGAAUCUACUAAAACAAGGCAAAAUGCCGUGUUUAUCUCGUCAACUUGUUGGCGAGAUUUUUU
22 guide scr	GACUCUGCUUGCUGGCACUACUGUUUUAGUACUCUGGAAACAGAAUCUACUAAAACAAGGCAAAAUGCCGUGUUUAUCUCGUCAACUUGUUGGCGAGAUUUUUU
23 (supp)	ACUUCGCUUGUAGGCACCUUGAUGUUUUAGUACUCUGGAAACAGAAUCUACUAAAACAAGGCAAAAUGCCGUGUUUAUCUCGUCAACUUGUUGGCGAGAUUUUUU
22 (supp)	AUUCAUAUCAGGCUCCUUACAGGUUUUAGUACUCUGGAAACAGAAUCUACUAAAACAAGGCAAAAUGCCGUGUUUAUCUCGUCAACUUGUUGGCGAGAUUUUUU
21 (supp)	GAGGUCCCUGGGCCGAAGCCCGUUUUAGUACUCUGGAAACAGAAUCUACUAAAACAAGGCAAAAUGCCGUGUUUAUCUCGUCAACUUGUUGGCGAGAUUUUUU
20 (supp)	UUCGAUGUAAGUCAAGUUUUGUUUUAGUACUCUGGAAACAGAAUCUACUAAAACAAGGCAAAAUGCCGUGUUUAUCUCGUCAACUUGUUGGCGAGAUUUUUU
14238	UAUACCGCUUUCAGUUUUCAUUUGUUUUAGUACUCUGGAAACAGAAUCUACUAAAACAAGGCAAAAUGCCGUGUUUAUCUCGUCAACUUGUUGGCGAGAUUUUUU
14238 scr	GUUCUAUUCUUCAUUUCGUUACAGUUUUAGUACUCUGGAAACAGAAUCUACUAAAACAAGGCAAAAUGCCGUGUUUAUCUCGUCAACUUGUUGGCGAGAUUUUUU
14210	UACGGACCGGUCUCAGGGAAUUGUUUUAGUACUCUGGAAACAGAAUCUACUAAAACAAGGCAAAAUGCCGUGUUUAUCUCGUCAACUUGUUGGCGAGAUUUUUU
14210 scr	GGCAUGCGACGUGGAACUCUAUGUUUUAGUACUCUGGAAACAGAAUCUACUAAAACAAGGCAAAAUGCCGUGUUUAUCUCGUCAACUUGUUGGCGAGAUUUUUU
GFP repression targets	Sequence from 5' -> 3'
Spy PAM adjacent	AATTCTTGTTGAATTAGATGGTGA
None PAM adjacent	CACTACTGGAAAACTACCTGTTC
Sau PAM adjacent	ACCTATGGTGTTCAATGCTTTTC
Dual PAM adjacent	ATTGGCGATGGCCCTGTCCTTTT
GFP gene	ATGAGCAAAGGAGAAGAACTTTTCACTGGAGTTGTCCCAATTCTTGTTGAATTAGATGGTGATGTTAATGGGCACAAATTTTCTGTCCGTGGAGAGGGTGAAGGTGATGCTACAAACGGAAAACTCACCCTTAAATTTATTTGCACTACTGGAAAACTACCTGTTCCGTGGCCAACACTTGTCACTACTCTGACCTATGGTGTTCAATGCTTTTCCCGTTATCCGGATCACATGAAACGGCATGACTTTTTCAAGAGTGCCATGCCCGAAGGTTATGTACAGGAACGCACTATATCTTTCAAAGATGACGGGACCTACAAGACGCGTGCTGAAGTCAAGTTTGAAGGTGATACCCTTGTTAATCGTATCGAGTTAAAGGGTATTGATTTTAAAGAAGAT…
GFP sgRNAs	Sequence from 5' -> 3'
RBS	CAUGGUACCUUUCUCCUCUUUAAGUUUUAGUACUCUGGAAACAGAAUCUACUAAAACAAGGCAAAAUGCCGUGUUUAUCUCGUCAACUUGUUGGCGAGAUUUUUU
GFP1	CCAGUGAAAAGUUCUUCUCCUUUGUUUUAGUACUCUGGAAACAGAAUCUACUAAAACAAGGCAAAAUGCCGUGUUUAUCUCGUCAACUUGUUGGCGAGAUUUUUU
GFP2	CACCAUCUAAUUCAACAAGAAUUGUUUUAGUACUCUGGAAACAGAAUCUACUAAAACAAGGCAAAAUGCCGUGUUUAUCUCGUCAACUUGUUGGCGAGAUUUUUU
GFP3	CAGAAAAUUUGUGCCCAUUAACAGUUUUAGUACUCUGGAAACAGAAUCUACUAAAACAAGGCAAAAUGCCGUGUUUAUCUCGUCAACUUGUUGGCGAGAUUUUUU
GFP4	AGCAUCACCUUCACCCUCUCCACGUUUUAGUACUCUGGAAACAGAAUCUACUAAAACAAGGCAAAAUGCCGUGUUUAUCUCGUCAACUUGUUGGCGAGAUUUUUU
GFP5	AAUUUAAGGGUGAGUUUUCCGUUGUUUUAGUACUCUGGAAACAGAAUCUACUAAAACAAGGCAAAAUGCCGUGUUUAUCUCGUCAACUUGUUGGCGAGAUUUUUU
GFP6	GAACAGGUAGUUUUCCAGUAGUGGUUUUAGUACUCUGGAAACAGAAUCUACUAAAACAAGGCAAAAUGCCGUGUUUAUCUCGUCAACUUGUUGGCGAGAUUUUUU
GFP7	CGGGCAUGGCACUCUUGAAAAAGGUUUUAGUACUCUGGAAACAGAAUCUACUAAAACAAGGCAAAAUGCCGUGUUUAUCUCGUCAACUUGUUGGCGAGAUUUUUU
GFP8	AAAGAUAUAGUGCGUUCCUGUACGUUUUAGUACUCUGGAAACAGAAUCUACUAAAACAAGGCAAAAUGCCGUGUUUAUCUCGUCAACUUGUUGGCGAGAUUUUUU
GFP9	ACGCGUCUUGUAGGUCCCGUCAUGUUUUAGUACUCUGGAAACAGAAUCUACUAAAACAAGGCAAAAUGCCGUGUUUAUCUCGUCAACUUGUUGGCGAGAUUUUUU
GFP10	UUUAAAAUCAAUACCCUUUAACUGUUUUAGUACUCUGGAAACAGAAUCUACUAAAACAAGGCAAAAUGCCGUGUUUAUCUCGUCAACUUGUUGGCGAGAUUUUUU
GFP11	GUUGAACGGAACCAUCUUCAACGGUUUUAGUACUCUGGAAACAGAAUCUACUAAAACAAGGCAAAAUGCCGUGUUUAUCUCGUCAACUUGUUGGCGAGAUUUUUU
GFP12	AUGUGUAAUCCCAGCAGCAGUUAGUUUUAGUACUCUGGAAACAGAAUCUACUAAAACAAGGCAAAAUGCCGUGUUUAUCUCGUCAACUUGUUGGCGAGAUUUUUU
20mer	CACCAUCUAAUUCAACAAGAAUUGUUUUAGUACUCUGGAAACAGAAUCUACUAAAACAAGGCAAAAUGCCGUGUUUAUCUCGUCAACUUGUUGGCGAGAUUUUUU
21mer	CACCAUCUAAUUCAACAAGAAUGUUUUAGUACUCUGGAAACAGAAUCUACUAAAACAAGGCAAAAUGCCGUGUUUAUCUCGUCAACUUGUUGGCGAGAUUUUUU
22mer	CACCAUCUAAUUCAACAAGAAGUUUUAGUACUCUGGAAACAGAAUCUACUAAAACAAGGCAAAAUGCCGUGUUUAUCUCGUCAACUUGUUGGCGAGAUUUUUU
23mer	CACCAUCUAAUUCAACAAGAGUUUUAGUACUCUGGAAACAGAAUCUACUAAAACAAGGCAAAAUGCCGUGUUUAUCUCGUCAACUUGUUGGCGAGAUUUUUU
GFP2 noncoding	AAUUCUUGUUGAAUUAGAUGGUGGUUUUAGUACUCUGGAAACAGAAUCUACUAAAACAAGGCAAAAUGCCGUGUUUAUCUCGUCAACUUGUUGGCGAGAUUUUUU
GFP6 noncoding	CACUACUGGAAAACUACCUGUUCGUUUUAGUACUCUGGAAACAGAAUCUACUAAAACAAGGCAAAAUGCCGUGUUUAUCUCGUCAACUUGUUGGCGAGAUUUUUU
Protein sequences	N -> C terminus
Wt SauCas9	MGKRNYILGLDIGITSVGYGIIDYETRDVIDAGVRLFKEANVENNEGRRSKRGARRLKRRRRHRIQRVKKLLFDYNLLTDHSELSGINPYEARVKGLSQKLSEEEFSAALLHLAKRRGVHNVNEVEEDTGNELSTKEQISRNSKALEEKYVAELQLERLKKDGEVRGSINRFKTSDYVKEAKQLLKVQKAYHQLDQSFIDTYIDLLETRRTYYEGPGEGSPFGWKDIKEWYEMLMGHCTYFPEELRSVKYAYNADLYNALNDLNNLVITRDENEKLEYYEKFQIIENVFKQKKKPTLKQIAKEILVNEEDIKGYRVTSTGKPEFTNLKVYHDIKDITARKEIIENAELLDQIAKILTIYQSSEDIQEELTNLNSELTQEEIEQISNLKGYTGTHNLSLK…
dSauCas9	MGKRNYILGLAIGITSVGYGIIDYETRDVIDAGVRLFKEANVENNEGRRSKRGARRLKRRRRHRIQRVKKLLFDYNLLTDHSELSGINPYEARVKGLSQKLSEEEFSAALLHLAKRRGVHNVNEVEEDTGNELSTKEQISRNSKALEEKYVAELQLERLKKDGEVRGSINRFKTSDYVKEAKQLLKVQKAYHQLDQSFIDTYIDLLETRRTYYEGPGEGSPFGWKDIKEWYEMLMGHCTYFPEELRSVKYAYNADLYNALNDLNNLVITRDENEKLEYYEKFQIIENVFKQKKKPTLKQIAKEILVNEEDIKGYRVTSTGKPEFTNLKVYHDIKDITARKEIIENAELLDQIAKILTIYQSSEDIQEELTNLNSELTQEEIEQISNLKGYTGTHNLSLK…
SpyCas9	MDKKYSIGLDIGTNSVGWAVITDEYKVPSKKFKVLGNTDRHSIKKNLIGALLFDSGETAEATRLKRTARRRYTRRKNRICYLQEIFSNEMAKVDDSFFHRLEESFLVEEDKKHERHPIFGNIVDEVAYHEKYPTIYHLRKKLVDSTDKADLRLIYLALAHMIKFRGHFLIEGDLNPDNSDVDKLFIQLVQTYNQLFEENPINASGVDAKAILSARLSKSRRLENLIAQLPGEKKNGLFGNLIALSLGLTPNFKSNFDLAEDAKLQLSKDTYDDDLDNLLAQIGDQYADLFLAAKNLSDAILLSDILRVNTEITKAPLSASMIKRYDEHHQDLTLLKALVRQQLPEKYKEIFFDQSKNGYAGYIDGGASQEEFYKFIKPILEKMDGTEELLVKLNREDLL…
FnoCas9	MNFKILPIAIDLGVKNTGVFSAFYQKGTSLERLDNKNGKVYELSKDSYTLLMNNRTARRHQRRGIDRKQLVKRLFKLIWTEQLNLEWDKDTQQAISFLFNRRGFSFITDGYSPEYLNIVPEQVKAILMDIFDDYNGEDDLDSYLKLATEQESKISEIYNKLMQKILEFKLMKLCTDIKDDKVSTKTLKEITSYEFELLADYLANYSESLKTQKFSYTDKQGNLKELSYYHHDKYNIQEFLKRHATINDRILDTLLTDDLDIWNFNFEKFDFDKNEEKLQNQEDKDHIQAHLHHFVFAVNKIKSEMASGGRHRSQYFQEITNVLDENNHQEGYLKNFCENLHNKKYSNLSVKNLVNLIGNLSNLELKPLRKYFNDKIHAKADHWDEQKFTETYCHWILGE…
CjeCas9	MARILAFDIGISSIGWAFSENDELKDCGVRIFTKVENPKTGESLALPRRLARSARKRLARRKARLNHLKHLIANEFKLNYEDYQSFDESLAKAYKGSLISPYELRFRALNELLSKQDFARVILHIAKRRGYDDIKNSDDKEKGAILKAIKQNEEKLANYQSVGEYLYKEYFQKFKENSKEFTNVRNKKESYERCIAQSFLKDELKLIFKKQREFGFSFSKKFEEEVLSVAFYKRALKDFSHLVGNCSFFTDEKRAPKNSPLAFMFVALTRIINLLNNLKNTEGILYTKDDLNALLNEVLKNGTLTYKQTKKLLGLSDDYEFKGEKGTYFIEFKKYKEFIKALGEHNLSQDDLNEIAKDITLIKDEIKLKKALAKYDLNQNQIDSLSKLEFKDHLNISFK…
